# Supplementary material for: A general photo-induced wide-scope regioselective hydroboration of alkenes without using a photocatalyst or an external initiator
Source: Royal Society of Chemistry journal article supplement (doi:10.1039/d2gc02313j), 2022-01-01

## A General Photo-Induced Wide-Scope Regioselective Hydroboration of Alkenes without Using Photocatalyst or External Initiator

Yu-Qi Miao<sup>a</sup>, Xin-Ying Li<sup>b</sup>, Qiao-Jing Pan<sup>a</sup>, Yubin Ma<sup>a</sup>, Jia-Xin Kang<sup>a</sup>, Yan-Na Ma<sup>b</sup>, Zhenxing Liu<sup>b\*</sup>, Xuenian Chen<sup>a,b\*</sup>

### Affiliations:

<sup>a</sup>Henan Key Laboratory of Boron Chemistry and Advanced Energy Materials, School of Chemistry and Chemical Engineering, Henan Normal University, Xinxiang, Henan, China.

<sup>b</sup>College of Chemistry, Zhengzhou University, Zhengzhou, Henan, China.

\*Corresponding Author: [Xuenian\\_Chen@zzu.edu.cn](mailto:Xuenian_Chen@zzu.edu.cn) (X. C), [Liuzhenxing@zzu.edu.cn](mailto:Liuzhenxing@zzu.edu.cn) (Z. L.)

### Table of Contents

|     |                                                                                              |    |
|-----|----------------------------------------------------------------------------------------------|----|
| 1.  | General information.....                                                                     | 2  |
| 2.  | Synthesis of Starting Materials.....                                                         | 2  |
| 3.  | Reaction condition optimization.....                                                         | 5  |
| 4.  | General Experimental Procedure for the hydroboration of alkenes.....                         | 6  |
| 5.  | The synthesis of boryl sulphide and its photochemical reaction (Figure S1-S3, Table S1)..... | 9  |
| 6.  | The UV/vis absorption and fluorescence spectroscopy (Figure S4-S6).....                      | 12 |
| 7.  | Mechanistic Experiments (Figure S7-S11).....                                                 | 14 |
| 8.  | Characterization data of products.....                                                       | 20 |
| 9.  | Characterization data of starting materials.....                                             | 50 |
| 10. | The crystallographic data (Figures S12-S14, Tables S2-S7).....                               | 58 |
| 11. | References .....                                                                             | 62 |
| 12. | NMR Spectra.....                                                                             | 63 |



## 1. General information

Unless otherwise noted, all reagents were purchased from commercial suppliers and used without further purification. The Blue LEDs lamp was directly purchased from the supermarket. Reactions were monitored by thin-layer chromatography (TLC) using 60 mesh silica gel plates visualized with short-wavelength UV light (254 nm).  $^1\text{H}$ ,  $^1\text{H}\{^{11}\text{B}\}$ , and  $^{13}\text{C}$  NMR spectra were recorded on Bruker Avance 600 and 400 spectrometers using  $\text{CDCl}_3$  or DMSO as solvents. Chemical shifts ( $\delta$ ) are reported in ppm relative to the solvent peak. The  $^{11}\text{B}$  and  $^{11}\text{B}\{^1\text{H}\}$  NMR spectra were obtained at 128 or 193 MHz. All  $^{11}\text{B}$  chemical shifts are referenced to  $\text{BF}_3\cdot\text{OEt}_2$  (0.0 ppm), with a negative sign indicating an upfield shift. Multiplicity was indicated as follows: s (singlet), d (doublet), t (triplet), q (quartet), m (multiplet), dd (doublet of doublet), q (quartet), with coupling constants ( $J$ ) in hertz (Hz).

## 2. Synthesis of Starting Materials

### 2.1 Preparation of NHC-BH<sub>3</sub> using the modified literature method<sup>1</sup>

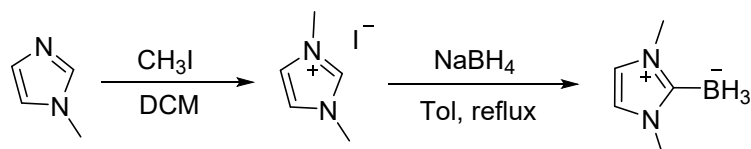

A 100 mL Schlenk-tube was charged with 1-methylimidazole (8.2 g, 100 mmol, 1.0 equiv.) in  $\text{CH}_2\text{Cl}_2$  (20 mL) to which methyl iodide (16.9 g, 120 mmol, 1.2 equiv.) was added dropwise over 10 min at 0 °C. The mixture was allowed to stir for 2 h at room temperature. The solvent was evaporated under the reduced pressure and obtained the crude product, and directly used for the next step without further purification. Then the mixture was added 50 mL toluene and  $\text{NaBH}_4$  (4.53 g, 120 mmol, 1.2 equiv.), and the mixture was placed in an oil bath at 120 °C for 24 h. The hot reaction solvent was cautiously decanted from the insoluble mixture, and the remaining residue was extracted with hot toluene ( $2 \times 20$  mL). The organic extracts were combined, evaporated, and further recrystallized over water to give the 5.3 g pure product as a fine white crystal in a 48% yield.

### 2.2 Preparation of TRIP thiol using the modified literature method<sup>2</sup>

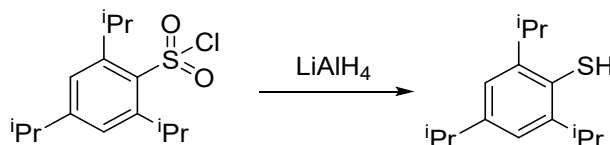

A 100 mL Schlenk-tube was charged with lithium aluminum hydride ( $\text{LiAlH}_4$ ) (1.52 g, 40.0 mmol, 2.0 equiv.). Dry  $\text{Et}_2\text{O}$  (20 mL) was then added and cooled to 0 °C. To this mixture, a solution of 2,4,6-triisopropylbenzene-1-sulfonyl chloride (5.96 g, 20 mmol, 1.0 equiv.) in  $\text{Et}_2\text{O}$  (20 mL) was added slowly. After completion of the addition, an additional load of  $\text{LiAlH}_4$  (0.76 g, 20 mmol, 1.0 equiv.) was added. The reaction was allowed to warm to rt and it was stirred overnight. Upon completion, the reaction was cooled to 0 °C and diluted with 40 mL  $\text{Et}_2\text{O}$ . The reaction was quenched with water (4 mL), 4 mL 15% (w/w)  $\text{NaOH}$  solution, and 10 mL water. The reaction was stirred for

30 min at 0 °C before MgSO<sub>4</sub> was added. The resulting white slurry was allowed to stir for 30 minutes at rt. The white solids were removed via filtration, with Et<sub>2</sub>O washing. The filtrate was then concentrated and distilled at reduced pressure to provide 3.8 g of 2,4,6-triisopropyl-benzenethiol as colorless oil in 80% yield.

### 2.3 Starting coumarin derivatives.

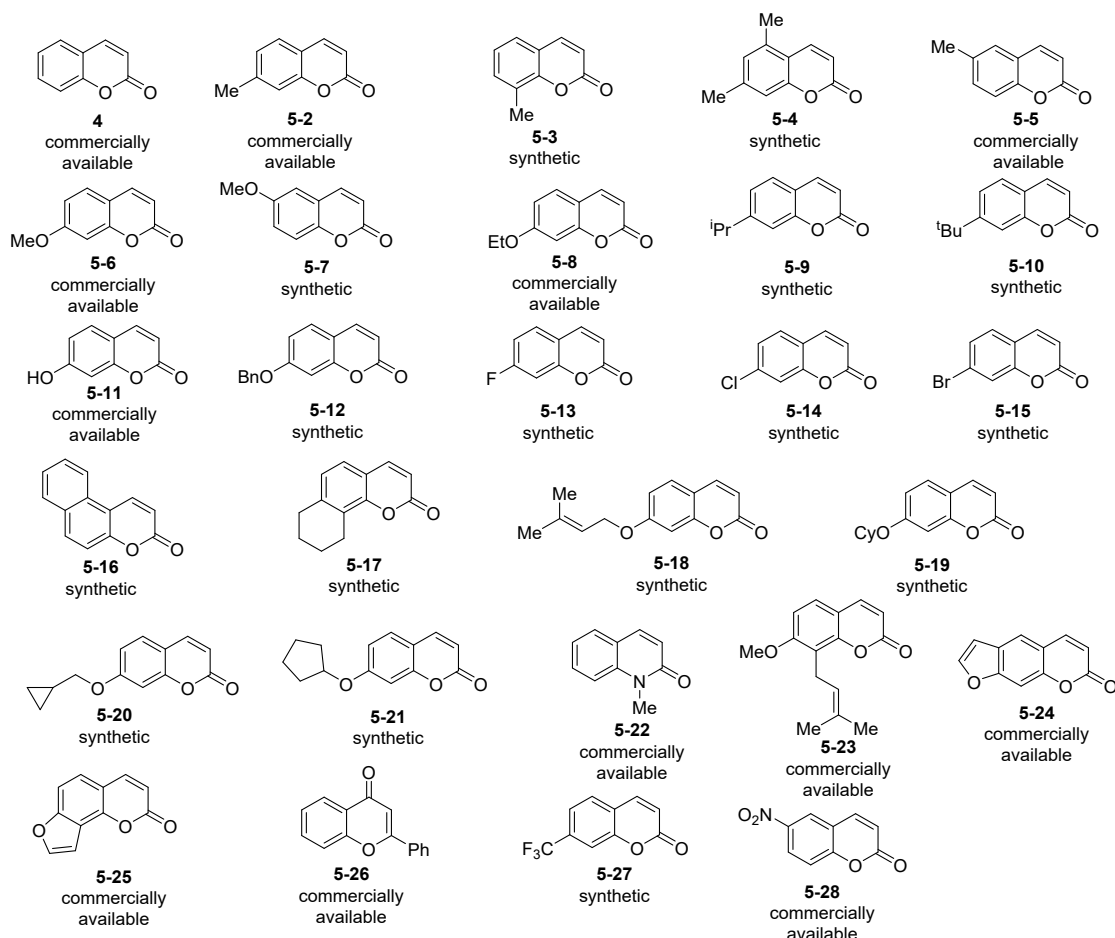

### 2.4 General Experimental Procedure for the Synthesis of Coumarins 5-3, 5-4, 5-7, 5-9, 5-10, 5-12 to 5-17.

A 100 mL Schlenk-tube was charged with phenol derivatives (10.0 mmol, 1.0 equiv.), trifluoromethanesulfonic acid (1.5 g, 10.0 mmol, 1.0 equiv.), and propiolic acid (350 mg, 5.0 mmol, 0.5 equiv.) in PhCl (25 mL), which was stirred at 100 °C for 3 h. After the starting material was consumed, monitored by TLC. The reaction was poured into H<sub>2</sub>O, neutralized with NaHCO<sub>3</sub> solution, and extracted with DCM (3 × 15 mL), dried by anhydrous Na<sub>2</sub>SO<sub>4</sub>, and the solvent was evaporated under the reduced pressure. The residue was purified by column chromatography (Petroleum ether: EtOAc) on silica gel to obtain products.

### 2.5 General Experimental Procedure for the Synthesis of Coumarins 5-18 to 5-21.

A 100mL Schlenk-tube was charged with 7-hydroxycoumarin (810 mg, 5.0 mmol, 1.0 equiv.), alkyl or aryl halide (6.0 mmol, 1.2 equiv.), and potassium carbonate (2.07 g, 15.0 mmol, 3.0 equiv.) in DMF (15 mL), which was stirred at 100 °C for 10 h. After the starting material was consumed, monitored by TLC. The reaction was poured into H<sub>2</sub>O, extracted with ethyl acetate (3 × 15 mL), and the combined extracts were washed



with water. The organic layer was dried over anhydrous Na<sub>2</sub>SO<sub>4</sub> and evaporated under reduced pressure. The residue was purified by column chromatography (Petroleum ether: EtOAc) on silica gel to obtain the product.

## 2.6 General Experimental Procedure for the Synthesis of Coumarins 5-27<sup>15</sup>

A 10 mL Schlenk-tube was charged with (*E*)-3-(4-(trifluoromethyl)phenyl)acrylic acid (1 mmol, 1.0 equiv.), Xanthone (0.05 mmol, 0.05 equiv.), selectflour (1 mmol, 1 equiv.) in HFIP (5 mL) and DCE (1 mL) with magnetic stirring under N<sub>2</sub> atmosphere. The tube was placed at a distance (app. 5 cm) from 10W blue LEDs (400 nm) lamp and the mixture was stirred for 24 h at room temperature. Then the reaction was added 5mL H<sub>2</sub>O, extracted with DCM (3 × 10 mL), dried over anhydrous Na<sub>2</sub>SO<sub>4</sub>, and evaporated under the reduced pressure. The residue was purified by column chromatography (Petroleum ether: EtOAc) on silica gel to obtain the products.

## 2.7 Starting $\alpha,\beta$ -unsaturated esters, acids, ketones, amide, nitriles, styrenes, imines.

9-2, 9-3, 11-3, 11-4, 11-5, 12-1 to 12-4, 13 were synthetic, others were commercially available.

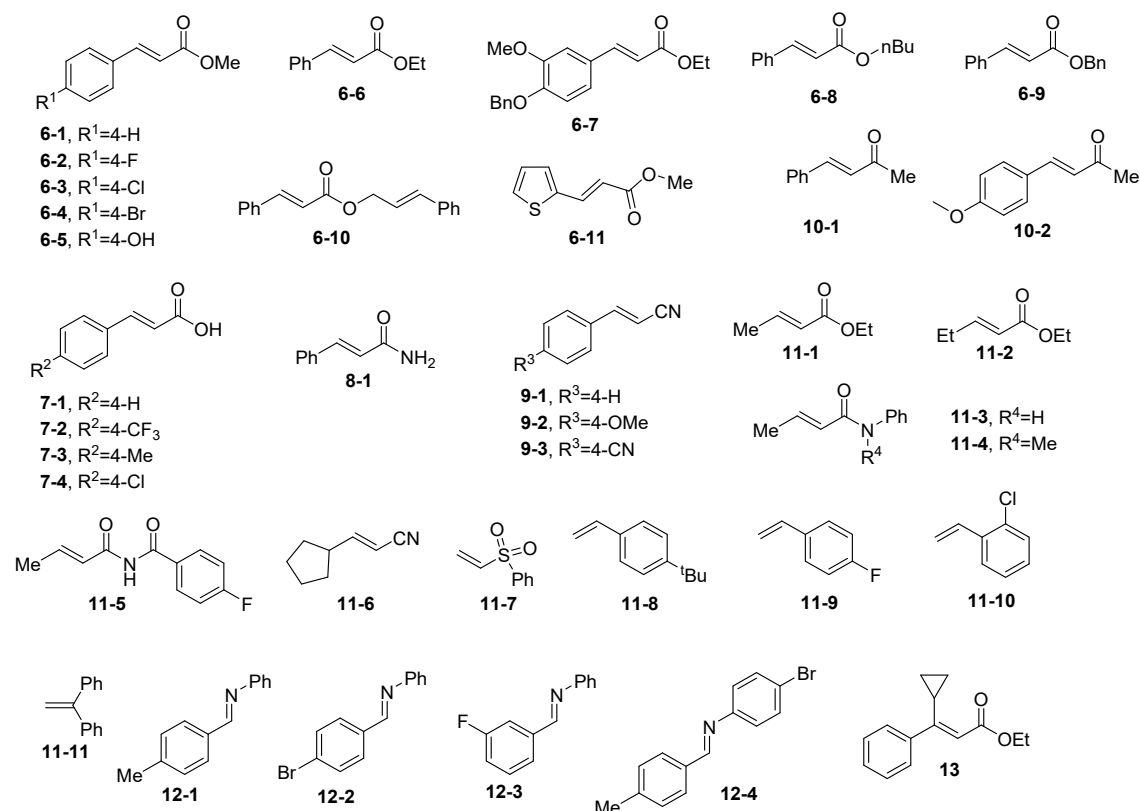

## 2.8 General Experimental Procedure for the Synthesis of 9-2, 9-3<sup>4</sup>.

To a mixture of NaH (2.4 mmol, 1.2 equiv.) in dry THF was added diethyl(cyanomethyl)phosphonate (2.4 mmol, 1.2 equiv.) at 0 °C under N<sub>2</sub> atmosphere. The mixture was stirred at room temperature for 0.5 h before adding the solution of aldehyde (2 mmol, 1.0 equiv.). The starting material was consumed, analyzed by TLC. The reaction was quenched with saturated NH<sub>4</sub>Cl (aq.). The mixture was extracted with ethyl acetate (3 × 15 mL), the organic layer was dried over anhydrous Na<sub>2</sub>SO<sub>4</sub> and evaporated under reduced pressure. The crude materials were purified by column

chromatography (Petroleum ether: EtOAc) on silica gel to obtain the product.

### **2.9 General Experimental Procedure for the Synthesis of 11-3 to 11-5<sup>5</sup>.**

A 100 mL Schlenk-tube was charged with aniline (3.0 mmol, 1.0 equiv.), potassium carbonate (420 mg, 3.0 mmol, 1.0 equiv.) in DCM (15 mL) to which crotonyl chloride (374 mg, 3.6 mmol, 1.2 equiv.) was added by syringe under N<sub>2</sub> atmosphere. The starting material was consumed, monitored by TLC. The reaction was poured into H<sub>2</sub>O, extracted with ethyl acetate (3 × 15 mL), dried over anhydrous Na<sub>2</sub>SO<sub>4</sub>, and evaporated under reduced pressure. The residue was purified by column chromatography (Petroleum ether: EtOAc) on silica gel to obtain the products **11-3**, **11-4**.

A 100 mL Schlenk-tube was charged with 4-fluorobenzamide (556 mg, 4.0 mmol, 2.0 equiv.) in THF (20 mL), NaH (192 mg, 4.8 mmol, 2.4 equiv.) was added at 0 °C. After stirring the reaction for 0.5 h, crotonyl chloride (210 mg, 2.0 mmol, 1.0 equiv.) was added at 0°C, after 10 minutes the solution was allowed to warm to room temperature and stirred for 4 h. The reaction was poured into H<sub>2</sub>O, extracted with ethyl acetate (3 × 15 mL), dried over anhydrous Na<sub>2</sub>SO<sub>4</sub>, and evaporated under reduced pressure. The residue was purified by column chromatography (Petroleum ether: EtOAc) on silica gel to obtain the product **11-5**.

### **2.10 General Experimental Procedure for the Synthesis of 12-1 to 12-4<sup>6</sup>.**

A 100 mL Schlenk-tube was charged with an aldehyde (10.0 mmol, 1 equiv.), aniline (10.0 mmol, 1 equiv.), and MgSO<sub>4</sub> (1.56 g, 13 mmol, 1.3 equiv.) in DCM (12 mL), which was stirred for 10h under N<sub>2</sub> atmosphere. The starting material was consumed, monitored by TLC. Then the mixture was filtered and the filter liquor was evaporated under reduced pressure. The final imines were recrystallized from n-hexane.

### **2.11 General Experimental Procedure for the Synthesis of 13<sup>13</sup>.**

A 25 mL Schlenk-tube was charged with NaH (80 mg, 2 mmol, 2.0 equiv.) in dry THF, the mixture was cooled to 0 °C, triethylphosphonoacetate (448 mg, 2 mmol, 2.0 equiv.) was added dropwise to the solution before the resulting solution was stirred for 1 h at 0 °C. The cyclopropyl(phenyl)methanone (146 mg, 1 mmol, 1.0 equiv.) was added to the reaction mixture, which was stirred for 1 h at 0 °C and another 20 h at 40 °C oil bath. The organic phase was separated and the aqueous phase was extracted with Et<sub>2</sub>O (3 × 10 mL). The combined organic phases were dried over MgSO<sub>4</sub>, concentrated in vacuo, and purified by silica gel column chromatography.

## **3. Reaction condition optimization**

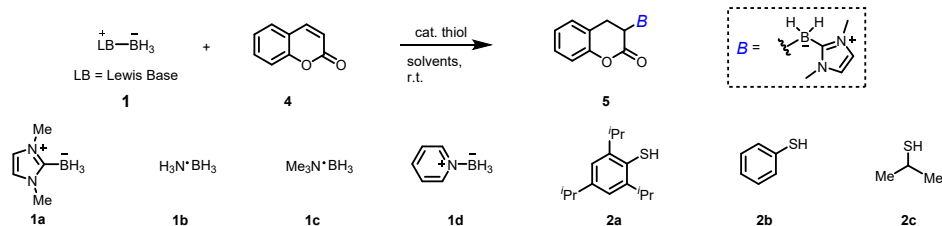

| Entry | Borane | Thiol | Equiv. of 1 | Loading of thiol (mmol %) | Solvent          | Conc. (M) | Atmosphere     | Yield (%) <sup>a</sup> |
|-------|--------|-------|-------------|---------------------------|------------------|-----------|----------------|------------------------|
| 1     | 1a     | 2a    | 1.3         | 10                        | THF              | 0.1       | N <sub>2</sub> | 90                     |
| 2     | 1b     | 2a    | 1.3         | 10                        | THF              | 0.1       | N <sub>2</sub> | 0                      |
| 3     | 1c     | 2a    | 1.3         | 10                        | THF              | 0.1       | N <sub>2</sub> | 0                      |
| 4     | 1d     | 2a    | 1.3         | 10                        | THF              | 0.1       | N <sub>2</sub> | 0                      |
| 5     | 1a     | 2b    | 1.3         | 10                        | THF              | 0.1       | N <sub>2</sub> | 82                     |
| 6     | 1a     | 2c    | 1.3         | 10                        | THF              | 0.1       | N <sub>2</sub> | 0                      |
| 7     | 1a     | 2a    | 1.3         | 10                        | MeCN             | 0.1       | N <sub>2</sub> | 87                     |
| 8     | 1a     | 2a    | 1.3         | 10                        | Toluene          | 0.1       | N <sub>2</sub> | 41                     |
| 9     | 1a     | 2a    | 1.3         | 10                        | 1,4-Dioxane      | 0.1       | N <sub>2</sub> | 59                     |
| 10    | 1a     | 2a    | 1.3         | 10                        | DCE              | 0.1       | N <sub>2</sub> | 87                     |
| 11    | 1a     | 2a    | 1.3         | 10                        | MeOH             | 0.1       | N <sub>2</sub> | 86                     |
| 12    | 1a     | 2a    | 1.3         | 10                        | H <sub>2</sub> O | 0.1       | N <sub>2</sub> | 70                     |
| 13    | 1a     | 2a    | 1.3         | 20                        | THF              | 0.1       | N <sub>2</sub> | 92                     |
| 14    | 1a     | 2a    | 1.3         | 5                         | THF              | 0.1       | N <sub>2</sub> | 78                     |
| 15    | 1a     | 2a    | 1.5         | 10                        | THF              | 0.1       | N <sub>2</sub> | 90                     |
| 16    | 1a     | 2a    | 1.1         | 10                        | THF              | 0.1       | N <sub>2</sub> | 85                     |
| 17    | 1a     | 2a    | 1.3         | 10                        | THF              | 0.1       | Air            | 16                     |
| 18    | 1a     | 2a    | 1.3         | 10                        | THF              | 0.2       | N <sub>2</sub> | 93                     |
| 19    | 1a     | 2a    | 1.3         | 10                        | THF              | 0.2       | N <sub>2</sub> | 0 <sup>b</sup>         |
| 20    | 1a     | 2a    | 1.3         | 0                         | THF              | 0.2       | N <sub>2</sub> | 0                      |

**Table S1:** Unless otherwise specified, reaction conditions were: coumarin (0.2 mmol, 1 equiv.), borane (0.26 mmol, 1.3 equiv.), thiol (0.02 mmol, 0.1 equiv.), and solvents (2 mL) were irradiated with blue LEDs for 24 h under nitrogen atmosphere. yields were determined by <sup>1</sup>H NMR using 1,3,5-methoxybenzen as the internal standard. <sup>b</sup>The reaction was set up in dark. DCE, 1,2-dichloroethane.

## 4. General Experimental Procedure for the hydroboration of alkenes.

### 4.1 General Experimental Procedure for the hydroboration of coumarins.

A 25 mL Schlenk-tube was charged with coumarins (2 mmol, 1.0 equiv.), NHC-borane (286 mg, 2.6 mmol, 1.3 equiv.), 2,4,6-triisopropyl-thiophenol (47 mg, 0.2 mmol, 0.1 equiv.) in dry THF (10 mL) with magnetic stirring under N<sub>2</sub> atmosphere. The tube was placed at a distance (app. 5 cm) from 10W blue LEDs (410-420 nm) lamp and the mixture was stirred for 24 h at room temperature.

General purified procedure of product **5a**.

After the reaction was illuminated for 24 h, the mixture was filtered and obtained the product directly. The product was washed with petroleum ether, and the product was

separated from the mother liquor, which was filtered again.

General purified procedure of products **5b**, **5f**, **5n**, **5o**, **5r**, **5v**.

After the reaction was illuminated for 24 h, the mixture was added 5 mL petroleum ether and remained stationary for 6-24 h until the product was separated from the solvent. Then the final product was filtered directly.

General purified procedure of product **5c**.

After the reaction was illuminated for 24 h, the mixture was added 10 mL petroleum ether and remained stationary for 6 h until the product was separated from the solvent. Then the final product was filtered directly.

General purified procedure of products **5d**, **5h**, **5i**.

After the reaction was illuminated for 24 h, THF was evaporated under reduced pressure. The residue was poured into 30 mL petroleum ether and stirred for 6 h. The crude product was filtered and added 1 mL ethyl acetate, which was stirred for 2 h and filtered to obtain the final product.

General purified procedure of products **5e**, **5l**, **5t**, **5x**, **5y**.

After the reaction was illuminated for 24 h, the product was separated from THF and filtered directly.

General purified procedure of products **5g**, **5s**, **5w**, **5z**.

After the reaction was illuminated for 24 h, THF was evaporated under reduced pressure. The residue was poured into 30 mL petroleum ether and stirred for 6 h. The crude product was filtered and added 2 mL ethyl acetate, which was stirred for 2 h and filtered to obtain the final product.

General purified procedure of product **5j**.

After the reaction was illuminated for 24 h, THF was evaporated under reduced pressure. The residue was poured into 30 mL petroleum ether and stirred for 6 h. The crude product was filtered and added 3 mL ethyl acetate and 7 mL petroleum ether, then stirred for 2 h and filtered to obtain the final product.

General purified procedure of product **5k**.

After the reaction was illuminated for 24 h, the crude product was separated from the THF and filtered. The crude product was added to 4 mL ethyl acetate and stirred for 4 h. The mixture was filtered to offer the final product.

General purified procedure of product **5m**.

After the reaction was illuminated for 24 h, the mixture was added 7 mL petroleum ether and remained stationary for 12 h until the product was separated from the solvent. The mixture was filtered to obtain the final product, and the filter liquor was poured into 15 mL petroleum ether. The final product was separated from the filter liquor and filtered again.

General purified procedure of product **5p**.

After the reaction was illuminated for 24 h, THF was evaporated under reduced pressure. The residue was poured into 30 mL petroleum ether and stirred for 6 h. The crude product was filtered and added 3 mL ethyl acetate, which was stirred for 2 h and filtered to obtain the final product.

General purified procedure of product **5q**.

After the reaction was illuminated for 24 h, the mixture was added 5 mL petroleum

ether and remained stationary for 12 h until the product was separated from the solvent, then the final product was filtered directly. The filtered liquor was evaporated under reduced pressure. The mixture was added 3 mL ethyl acetate and stirred for 4 h. The mixture was also filtered to obtain the final product.

General purified procedure of product **5u**.

After the reaction was illuminated for 24 h, the mixture was filtered and obtained the final product directly. The filtered liquor was added 15 mL petroleum ether, and the crude product was separated from filter liquor, which was filtered. The crude product was added 2 mL ethyl acetate, which was stirred for 2 h and filtered to obtain the final product.

#### **4.2 General Experimental Procedure for the hydroboration of coumarins 5-27, 5-28.**

A 25 mL Schlenk-tube was charged with coumarins (0.2 mmol, 1.0 equiv.), NHC-borane (28.6 mg, 0.26 mmol, 1.3 equiv.), 2,4,6-triisopropyl-thiophenol (4.7 mg, 0.02 mmol, 0.1 equiv.) in dry THF (2 mL) with magnetic stirring under N<sub>2</sub> atmosphere. The tube was placed at a distance (app. 5 cm) from 10W blue LEDs (410-420 nm) lamp and the mixture was stirred for 24 h at room temperature. Then the reaction was added 5 mL H<sub>2</sub>O, extracted with DCM (3 × 10 mL), dried over anhydrous Na<sub>2</sub>SO<sub>4</sub>, and evaporated under reduced pressure. The residue was purified by column chromatography (Petroleum ether: EtOAc) on silica gel to obtain the products **5aa**.

#### **4.3 General Experimental Procedure for the hydroboration of 6-1 to 6-11, 7-1 to 7-4, 8-1, 9-1 to 9-3, 10-1, 10-2, 11-3, 11-4, 11-6, 11-7, 11-11**

A 10 mL Schlenk-tube was charged with alkenes (0.2 mmol, 1.0 equiv.), NHC-borane (28.6 mg, 0.26 mmol, 0.13 equiv.), 2,4,6-triisopropyl-thiophenol (4.7 mg, 0.02 mmol, 0.01 equiv.) in dry THF (1.5 mL) with magnetic stirring under N<sub>2</sub> atmosphere. The tube was placed at a distance (app. 5 cm) from 10W blue LEDs (410-420 nm) lamp and the mixture was stirred for 24 h at room temperature. Then the reaction was added 5 mL H<sub>2</sub>O, extracted with DCM (3 × 10 mL), dried over anhydrous Na<sub>2</sub>SO<sub>4</sub>, and evaporated under reduced pressure. The residue was purified by column chromatography (Petroleum ether: EtOAc) on silica gel to obtain the products **6a-k, 7a-d, 8a, 9a-c, 10a-b, 11c-d, 11f, 11g, 11k**.

#### **4.4 General Experimental Procedure for the hydroboration of 11-1, 11-2.**

A 10 mL Schlenk-tube was charged with alkenes (0.4 mmol, 1.0 equiv.), NHC-borane (57.2 mg, 0.52 mmol, 0.13 equiv.), 2,4,6-triisopropyl-thiophenol (9.4 mg, 0.04 mmol, 0.01 equiv.) in dry THF (3 mL) with magnetic stirring under N<sub>2</sub> atmosphere. The tube was placed at a distance (app. 5 cm) from 10W blue LEDs (410-420 nm) lamp and the mixture was stirred for 24 h at room temperature. Then the reaction was added 5 mL H<sub>2</sub>O, extracted with DCM (3 × 10 mL), dried over anhydrous Na<sub>2</sub>SO<sub>4</sub>, and evaporated under reduced pressure. The residue was purified by column chromatography (Petroleum ether: EtOAc) on silica gel to obtain the products **11a, 11b**.

#### **4.5 General Experimental Procedure for the hydroboration of 11-5.**

A 10 mL Schlenk-tube was charged with alkenes (41 mg, 0.2 mmol, 1.0 equiv.), NHC-borane (66 mg, 0.6 mmol, 3 equiv.), 2,4,6-triisopropyl-thiophenol (14.2 mg, 0.06 mmol, 0.03 equiv.) in DCE (1.5 mL) with magnetic stirring under N<sub>2</sub> atmosphere. The tube

was placed at a distance (app. 5 cm) from 10W blue LEDs (410-420 nm) lamp and the mixture was stirred for 24 h at room temperature. Then the reaction was added 5 mL H<sub>2</sub>O, extracted with DCM (3 × 10 mL), dried over anhydrous Na<sub>2</sub>SO<sub>4</sub>, and evaporated under reduced pressure. The residue was purified by column chromatography (Petroleum ether: EtOAc) on silica gel to obtain the product **11e**.

#### 4.6 General Experimental Procedure for the hydroboration of **11-8** to **11-10**.

A 10 mL Schlenk-tube was charged with styrenes (0.2 mmol, 1.0 equiv.), NHC-borane (44 mg, 0.4 mmol, 2 equiv.), 2,4,6-triisopropyl-thiophenol (9.4 mg, 0.04 mmol, 0.02 equiv.) in THF (1.5 mL) with magnetic stirring under N<sub>2</sub> atmosphere. The tube was placed at a distance (app. 5 cm) from 10W blue LEDs (410-420 nm) lamp and the mixture was stirred for 24 h at room temperature. Then the reaction was added 5 mL H<sub>2</sub>O, extracted with DCM (3 × 10 mL), dried over anhydrous Na<sub>2</sub>SO<sub>4</sub>, and evaporated under reduced pressure. The residue was purified by column chromatography (Petroleum ether: EtOAc) on silica gel to obtain the products **11h-j**

#### 4.7 General Experimental Procedure for the hydroboration of **12-1** to **12-4**.

A 10 mL Schlenk-tube was charged with imines (0.2 mmol, 1.0 equiv.), NHC-borane (28.6 mg, 0.26 mmol, 0.13 equiv.), 2,4,6-triisopropyl-thiophenol (4.7 mg, 0.02 mmol, 0.01 equiv.) in dry THF (1.5 mL) with magnetic stirring under N<sub>2</sub> atmosphere. The tube was placed at a distance (app. 5 cm) from 10W blue LEDs (410-420 nm) lamp and the mixture was stirred for 24 h at room temperature. Then the reaction was added 5 mL H<sub>2</sub>O, extracted with DCM (3 × 10 mL), dried over anhydrous Na<sub>2</sub>SO<sub>4</sub>, and evaporated under reduced pressure. The residue was purified by column chromatography (Petroleum ether: EtOAc) on silica gel to obtain the products **12a-d**.

## 5. The synthesis of boryl sulphide and its photochemical reaction

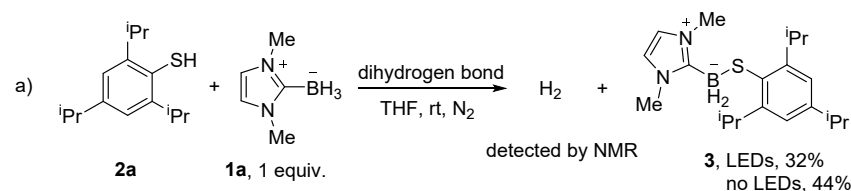

A 10 mL Schlenk-tube was charged with NHC-borane (165 mg, 1.5 mmol, 1.0 equiv.) and 2,4,6-triisopropyl-thiophenol (354 mg, 1.5 mmol, 1.0 equiv.) in THF (5 mL) with magnetic stirring under N<sub>2</sub> atmosphere. The tube was placed at a distance (app. 5 cm) from 10W blue LEDs (410-420 nm) lamp and the mixture was stirred for 24 h at room temperature. The resulting gas was passed through Tol-*d*<sub>8</sub> and detected by <sup>1</sup>H NMR, showing that H<sub>2</sub> was produced. Then the reaction was added 10 mL H<sub>2</sub>O, extracted with DCM (3 × 10 mL), dried over anhydrous Na<sub>2</sub>SO<sub>4</sub>, and evaporated under reduced pressure. The residue was purified by column chromatography (Petroleum ether: EtOAc) on silica gel to obtain the product 165 mg **3** in 32% isolated yield.

A 10 mL Schlenk-tube was charged with NHC-borane (165 mg, 1.5 mmol, 1.0 equiv.) and 2,4,6-triisopropyl-thiophenol (354 mg, 1.5 mmol, 1.0 equiv.) in THF (5 mL) with magnetic stirring under N<sub>2</sub> atmosphere. The mixture was stirred for 24 h at room temperature under dark conditions. The resulting gas was passed through Tol-*d*<sub>8</sub> and detected by <sup>1</sup>H NMR, showing that H<sub>2</sub> was produced. Then the reaction was added 10

mL H<sub>2</sub>O, extracted with DCM (3 × 10 mL), dried over anhydrous Na<sub>2</sub>SO<sub>4</sub>, and evaporated under reduced pressure. The residue was purified by column chromatography (Petroleum ether: EtOAc) on silica gel to obtain the product 227 mg **3** in 44% isolated yield.

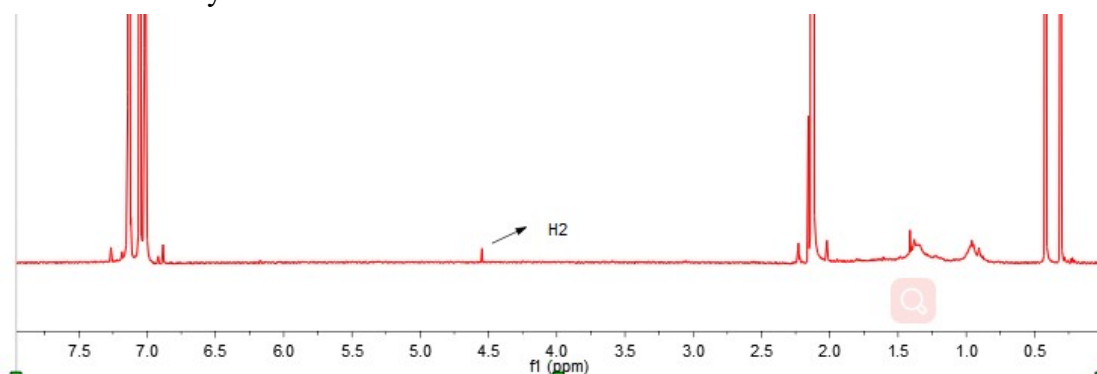

Figure S1. The <sup>1</sup>H NMR spectra of the H<sub>2</sub> in Tol-*d*<sub>8</sub>

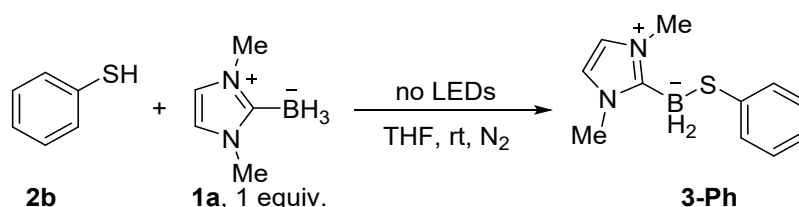

A 10 mL Schlenk-tube was charged with NHC-borane (22 mg, 0.2 mmol, 1.0 equiv.) and thiophenol (22 mg, 0.2 mmol, 1.0 equiv.) in THF (2 mL) with magnetic stirring under N<sub>2</sub> atmosphere. The mixture was stirred for 24 h at room temperature. Then the reaction was added 3 mL H<sub>2</sub>O, extracted with DCM (3 × 10 mL), dried over anhydrous Na<sub>2</sub>SO<sub>4</sub>, and evaporated under reduced pressure. The residue was purified by column chromatography (Petroleum ether: EtOAc) on silica gel to obtain the product 11 mg **3-Ph** in a 25% isolated yield.

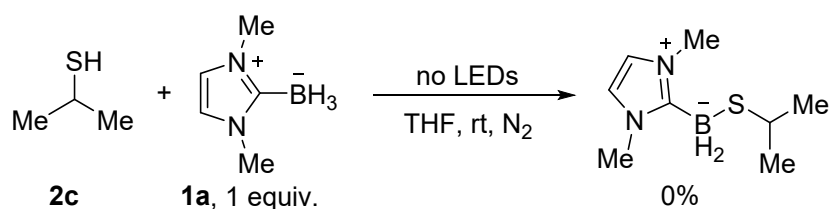

A 10 mL Schlenk-tube was charged with NHC-borane (22 mg, 0.2 mmol, 1.0 equiv.) and 2-mercapto-2-methylpropane (15.2 mg, 0.2 mmol, 1.0 equiv.) in THF (2 mL) with magnetic stirring under N<sub>2</sub> atmosphere. The mixture was stirred for 24 h at room temperature under dark conditions. No targeted compound was generated by TLC and <sup>11</sup>B NMR was detected.

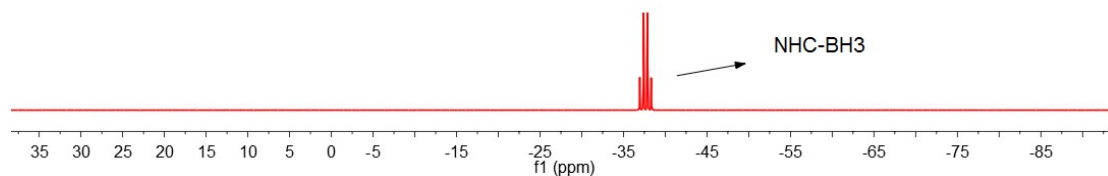

Figure S2. The  $^{11}\text{B}$  NMR spectra of the reaction mixture with propane-2-thiol and **1a** in THF.

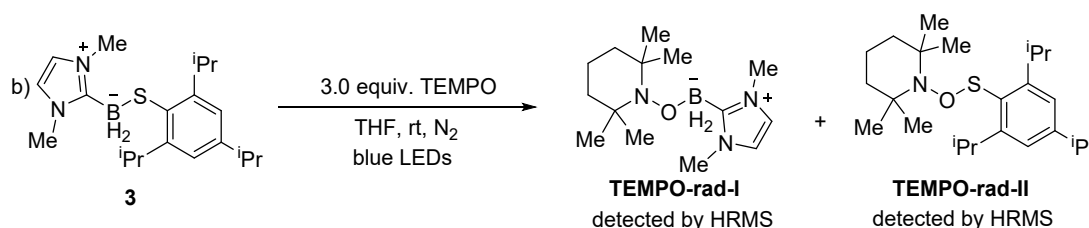

A 10 mL Schlenk-tube was charged with compound **3** (34 mg, 0.1 mmol, 1.0 equiv.) and TEMPO (47 mg, 0.3 mmol, 3.0 equiv.) in THF (2 mL) with magnetic stirring under  $\text{N}_2$  atmosphere. The tube was placed at a distance (app. 5 cm) from 10W blue LEDs (410-420 nm) and the mixture was stirred for 24 h at room temperature. We found the boryl radical-trapping and thiyl radical-trapping products by HRMS.

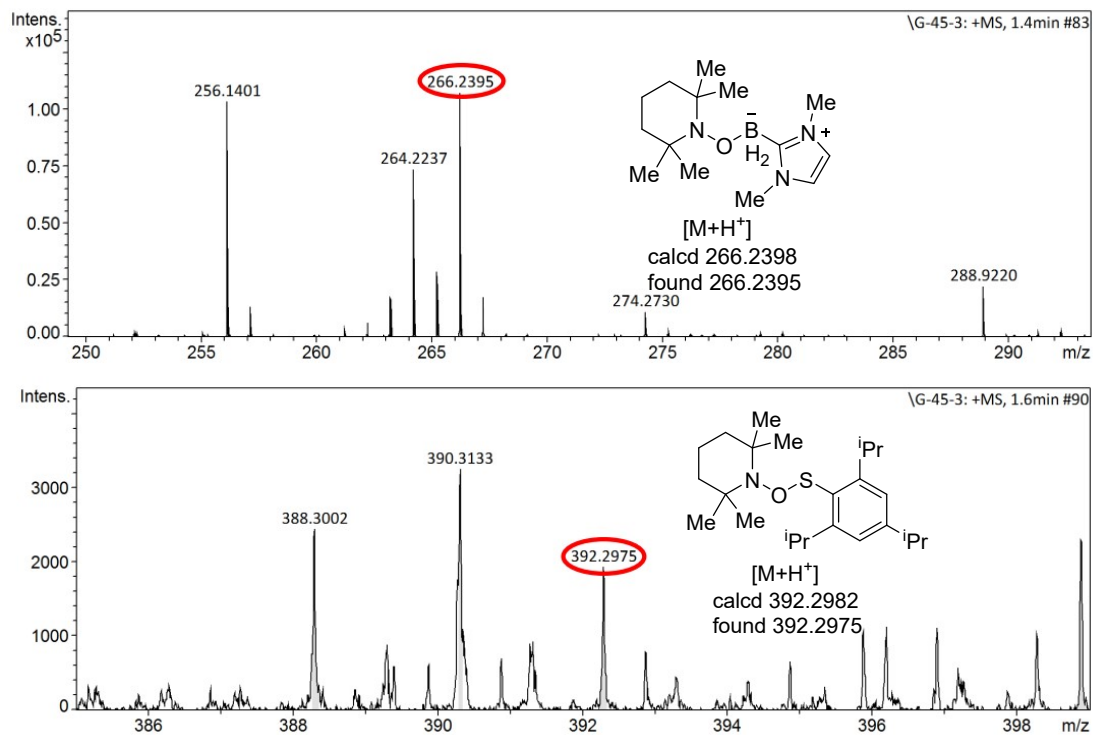

Figure S3. HRMS data of the reaction mixture



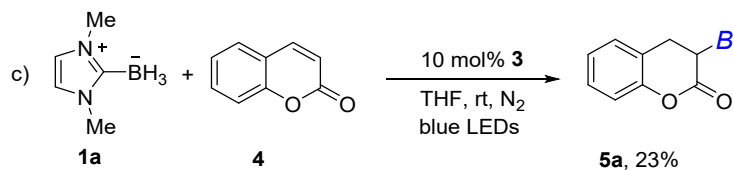

A 10 mL Schlenk-tube was charged with coumarin (29.2 mg, 0.2 mmol, 1.0 equiv.), NHC-borane (28.6 mg, 0.26 mmol, 1.3 equiv.) and compound **3** (6.9 mg, 0.02 mmol, 0.1 equiv.) in THF (2 mL) with magnetic stirring under N<sub>2</sub> atmosphere. The tube was placed at a distance (app. 5 cm) from 10W blue LEDs (410-420 nm) lamp and the mixture was stirred for 10 h at room temperature. Then the reaction was added 5 mL H<sub>2</sub>O, extracted with DCM (3 × 10 mL), dried over anhydrous Na<sub>2</sub>SO<sub>4</sub>, and evaporated under reduced pressure. The residue was purified by column chromatography (Petroleum ether: EtOAc) on silica gel to obtain the 12 mg product in 23% yield.

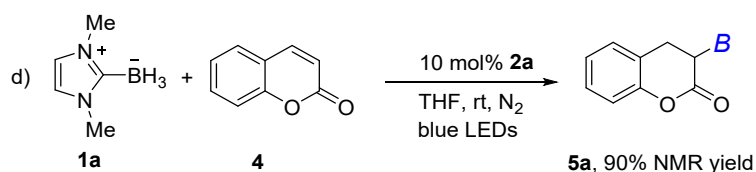

A 10 mL Schlenk-tube was charged with coumarin (29.2 mg, 0.2 mmol, 1.0 equiv.), NHC-borane (28.6 mg, 0.26 mmol, 1.3 equiv.) and compound **3** (6.9 mg, 0.02 mmol, 0.1 equiv.) in THF (2 mL) with magnetic stirring under N<sub>2</sub> atmosphere. The tube was placed at a distance (app. 5 cm) from 10W blue LEDs (410-420 nm) lamp and the mixture was stirred for 10 h at room temperature. The solvent was evaporated under the reduced pressure and the mixture was subjected to <sup>1</sup>H NMR to determine the yield (90%) using 1,3,5-methoxybenzen as the internal standard.

## 6. The UV/vis absorption and fluorescence spectroscopy.

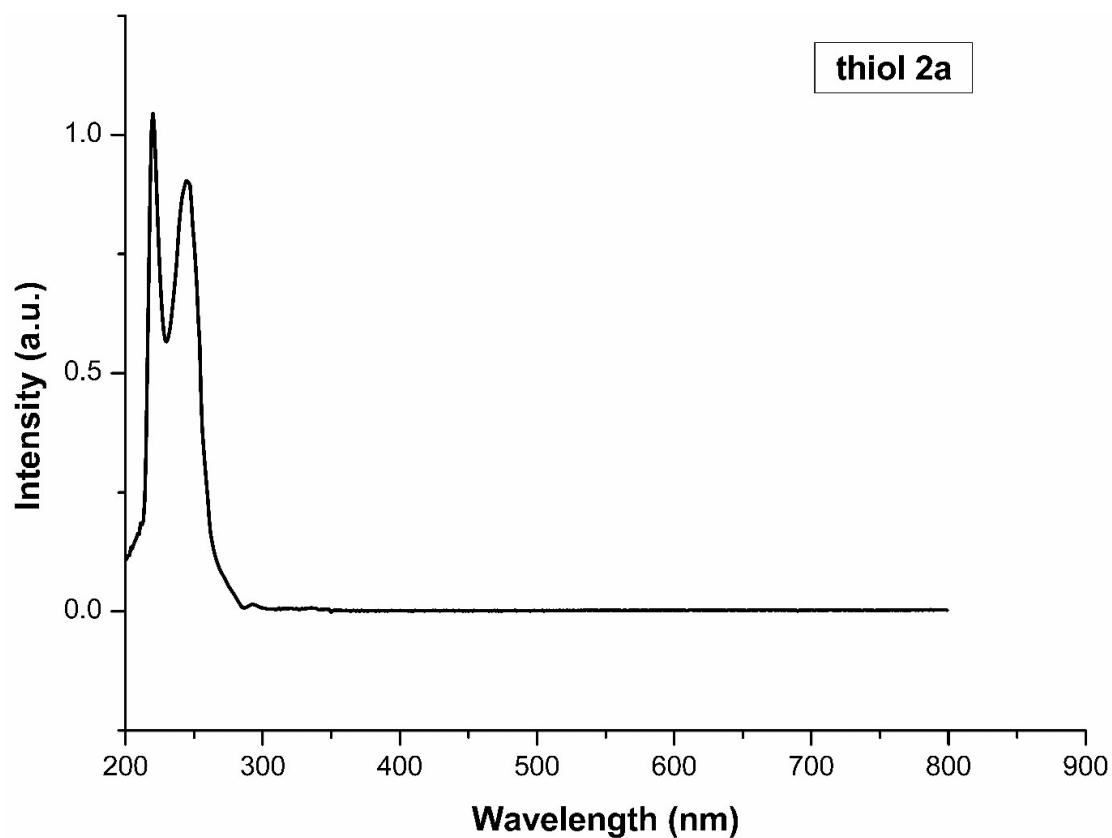

Figure S4. UV/vis absorption of thiol 2a

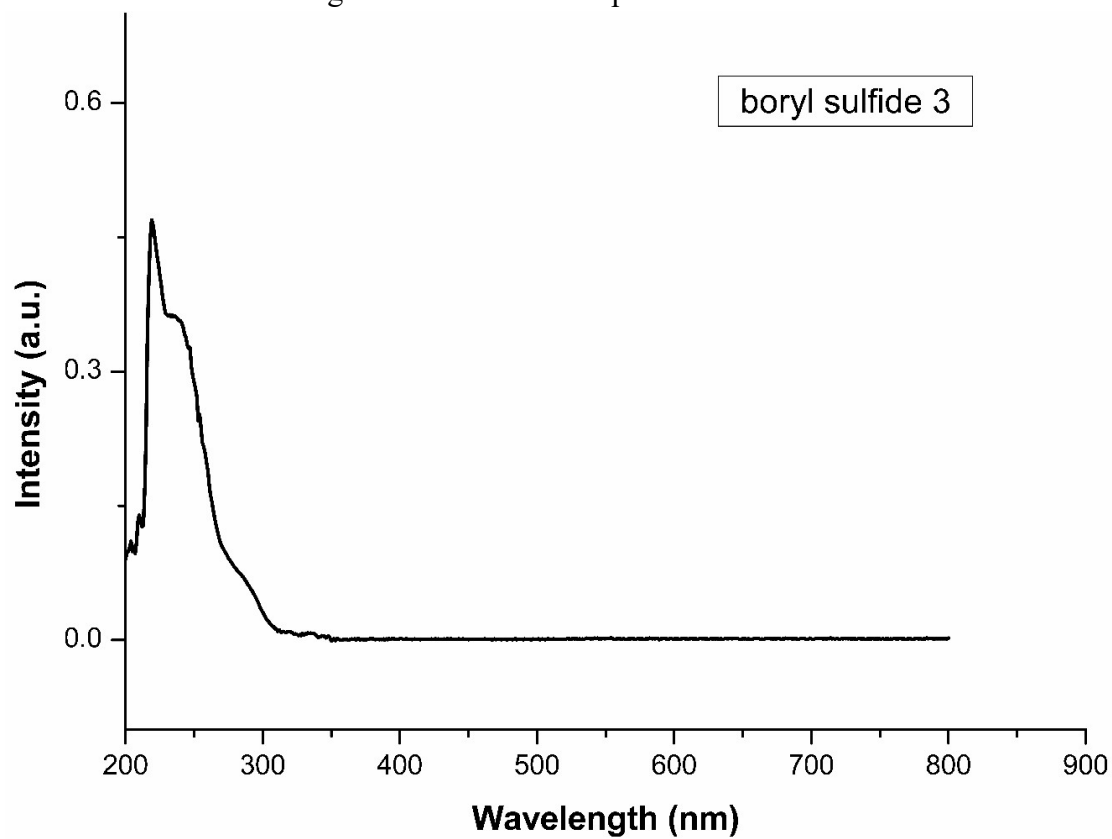

Figure S5. UV/vis absorption of boryl sulphide 3

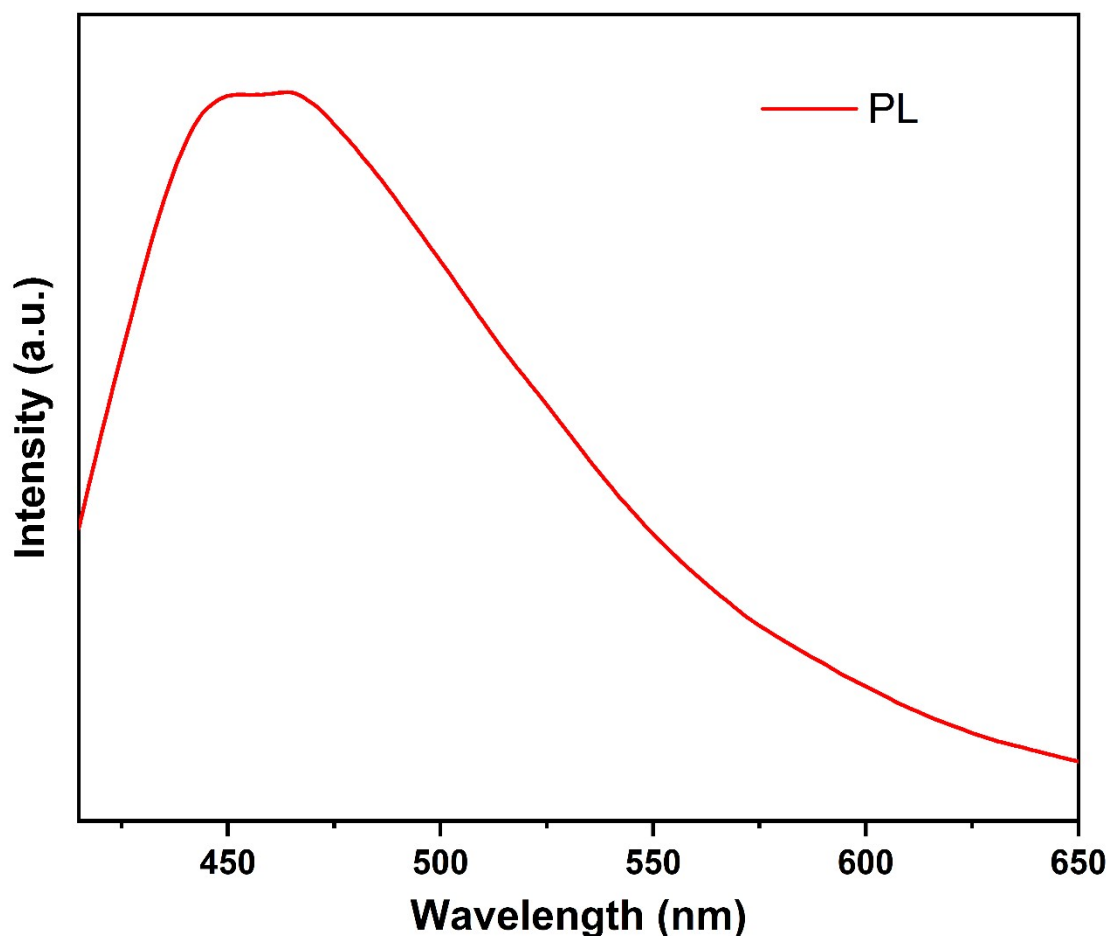

Figure S6. fluorescence spectroscopy of boryl sulphide **3**

## 6. Mechanistic Experiments.

### (I) Monitoring the catalytic reaction

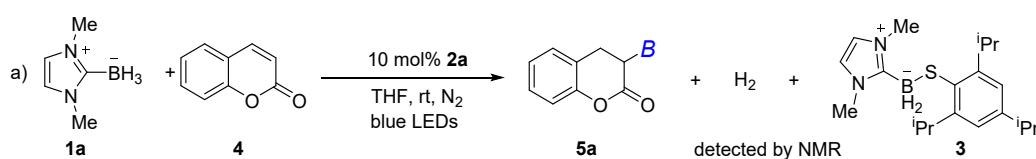

A 100 mL Schlenk-tube was charged with coumarin (1.46 g, 10 mmol, 1.0 equiv.), NHC-borane (1.43 g, 13 mmol, 1.3 equiv.) and 2,4,6-triisopropyl-thiophenol (236 mg, 1.0 mmol, 0.1 equiv.) in THF (70 mL) with magnetic stirring under N<sub>2</sub> atmosphere. The tube was placed at a distance (app. 5 cm) from 10W blue LEDs (410-420 nm) lamp and the mixture was stirred for 10 h at room temperature. The resulting gas was passed through Tol-*d*<sub>8</sub> and detected by <sup>1</sup>H NMR, showing that H<sub>2</sub> was produced. The mixture was detected by <sup>11</sup>B NMR and <sup>11</sup>B {<sup>1</sup>H} NMR, showing that boryl sulphide **3** was generated in the reaction process.

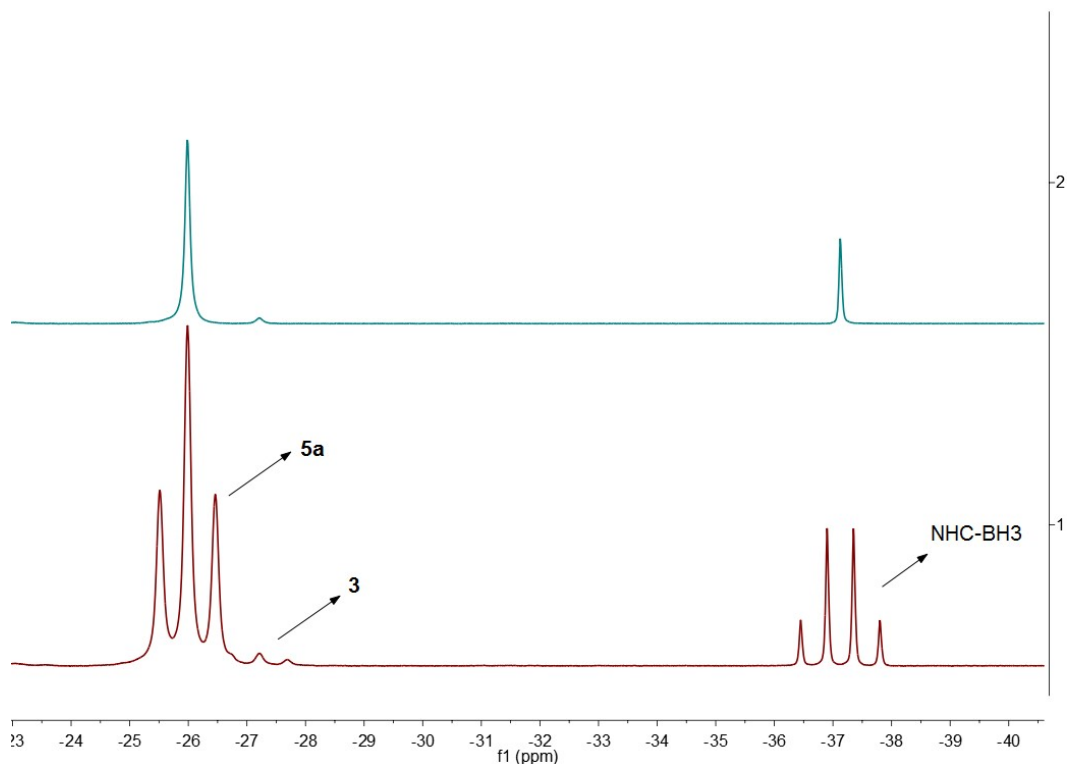

Figure S7. The  $^{11}\text{B}$  NMR (a) and  $^{11}\text{B}$   $\{^1\text{H}\}$  NMR (b) spectra of the reaction mixture in THF.

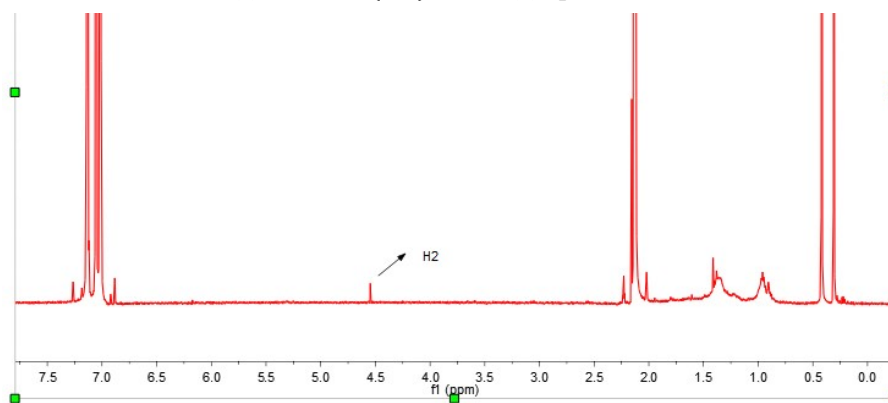

Figure S8. The  $^1\text{H}$  NMR spectra of the  $\text{H}_2$  in  $\text{Tol-}d_8$

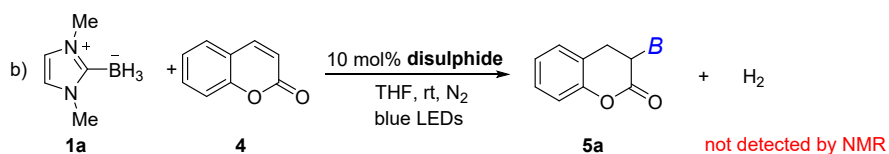

A 100 mL Schlenk-tube was charged with coumarin (1.46 g, 10 mmol, 1.0 equiv.), NHC-borane (1.43 g, 13 mmol, 1.3 equiv.) and disulphide (235 mg, 0.5 mmol, 0.05 equiv.) in THF (70 mL) with magnetic stirring under  $\text{N}_2$  atmosphere. The tube was placed at a distance (app. 5 cm) from 10W blue LEDs (410-420 nm) lamp and the mixture was stirred for 10 h at room temperature. The  $\text{H}_2$  was not detected by  $^1\text{H}$  NMR.

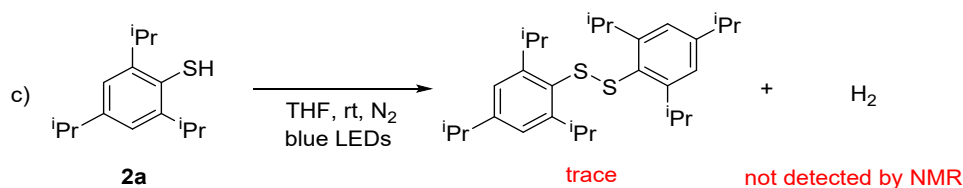

A 10 mL Schlenk-tube was charged with 2,4,6-triisopropylthiophenol (470 mg) in THF (3 mL) with magnetic stirring under N<sub>2</sub> atmosphere. The tube was placed at a distance (app. 5 cm) from 10W blue LEDs (410-420 nm) and the mixture was stirred for 10 h at room temperature. The H<sub>2</sub> was not detected by <sup>1</sup>H NMR. And the only trace disulphide was detected by TLC detected.

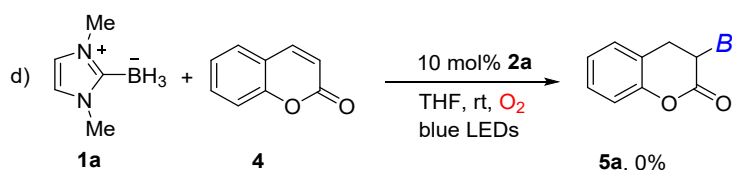

A 10 mL Schlenk-tube was charged with coumarin (29.2 mg, 0.2 mmol, 1.0 equiv.), NHC-borane (28.6 mg, 0.26 mmol, 1.3 equiv.) and 2,4,6-triisopropylthiophenol (4.7 mg, 0.02 mmol, 0.1 equiv.) in THF (1.5 mL) with magnetic stirring under O<sub>2</sub> atmosphere. The tube was placed at a distance (app. 5 cm) from 10W blue LEDs (410-420 nm) and the mixture was stirred for 24 h at room temperature. No desired product was formed by TLC detected.

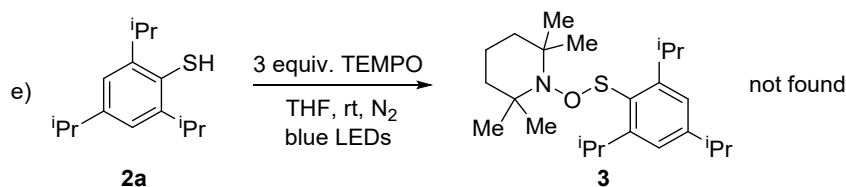

A 10 mL Schlenk-tube was charged with 2,4,6-triisopropylthiophenol (0.1 mmol, 24 mg) and TEMPO (0.3 mmol, 3.0 equiv., 47 mg) in THF (2 mL) with magnetic stirring under N<sub>2</sub> atmosphere. The tube was placed at a distance (app. 5 cm) from 10W blue LEDs (410-420 nm) and the mixture was stirred for 24 h at room temperature. No thiyl radical-trapping product was formed by HRMS detected.

## (II) Control experiments and radical-trapping experiments

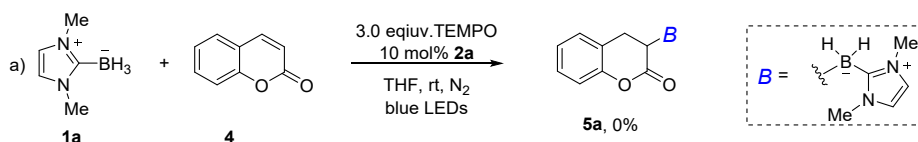

Detected compounds:

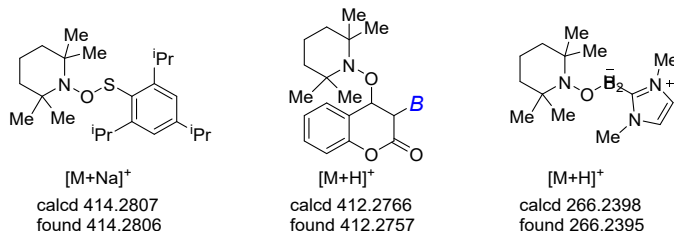

A 10 mL Schlenk-tube was charged with coumarin (29.2 mg, 0.2 mmol, 1.0 equiv.), NHC-borane (28.6 mg, 0.26 mmol, 1.3 equiv.), 2,4,6-triisopropyl-thiophenol (4.7 mg, 0.02 mmol, 0.1 equiv.) and TEMPO (94 mg, 0.6 mmol, 3.0 equiv.) in THF (1.5 mL) with magnetic stirring under N<sub>2</sub> atmosphere. The tube was placed at a distance (app. 5 cm) from 10W blue LEDs (410-420 nm) lamp and the mixture was stirred for 24 h at room temperature. No desired product was formed and we found the boryl radical, thiyl radical, and intermediate A radical-trapping products.

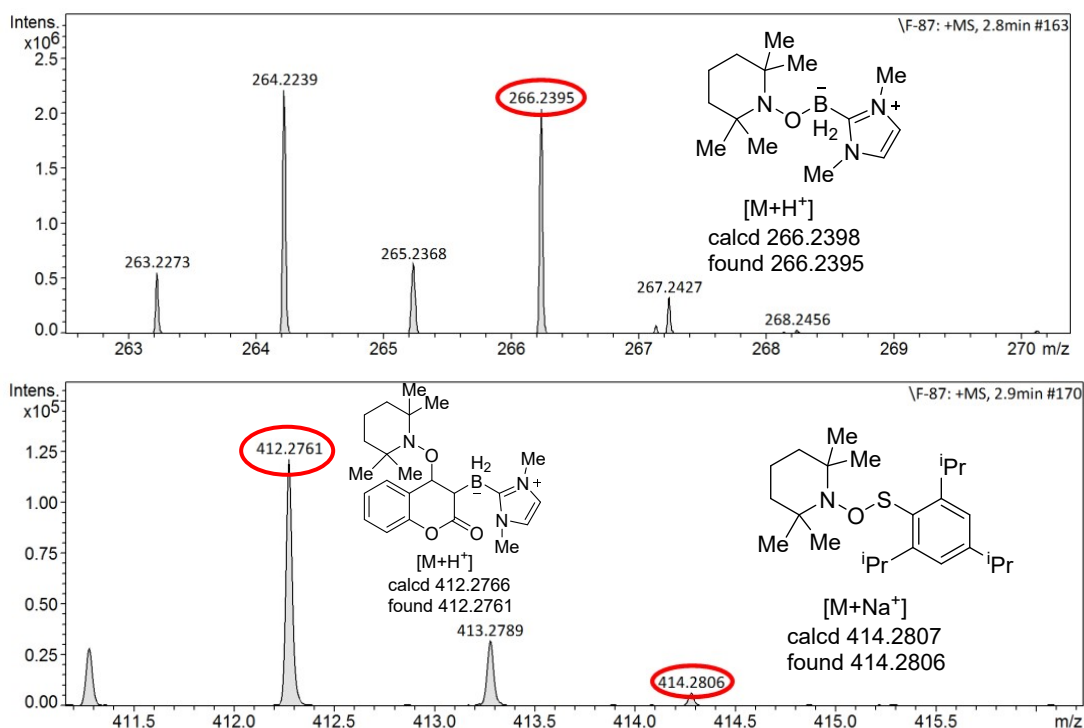

Figure S9. HRMS data of the reaction mixture

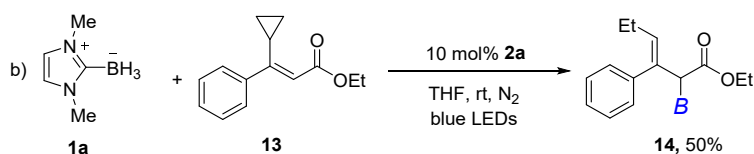

A 10 mL Schlenk-tube was charged with **13** (22 mg, 0.1 mmol, 1.0 equiv.), NHC-borane (14.3 mg, 0.13 mmol, 1.3 equiv.), 2,4,6-triisopropyl-thiophenol (2.4 mg, 0.01

mmol, 0.1 equiv.) in THF (1.5 mL) with magnetic stirring under N<sub>2</sub> atmosphere. The tube was placed at a distance (app. 5 cm) from 10W blue LEDs (410-420 nm) lamp and the mixture was stirred for 24 h at room temperature. Then the reaction was added 5 mL H<sub>2</sub>O, extracted with DCM (3 × 10 mL), dried over anhydrous Na<sub>2</sub>SO<sub>4</sub>, and evaporated under reduced pressure. The residue was purified by column chromatography (Petroleum ether: EtOAc) on silica gel to obtain the product **14** in 50% yield.

### (III) Deuterium-labeled experiments

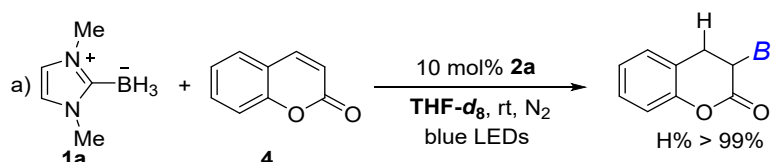

A 10 mL Schlenk-tube was charged with coumarin (29.2 mg, 0.2 mmol, 1.0 equiv.), NHC-borane (28.6 mg, 0.26 mmol, 1.3 equiv.) and 2,4,6-triisopropyl-thiophenol (4.7 mg, 0.02 mmol, 0.1 equiv.) in THF-*d*<sub>8</sub> (1.0 mL) with magnetic stirring under N<sub>2</sub> atmosphere. The tube was placed at a distance (app. 5 cm) from 10W blue LEDs (410-420 nm) lamp and the mixture was stirred for 24 h at room temperature. The solvent was evaporated under the reduced pressure and detected by <sup>1</sup>H NMR, indicating no deuterium hydrogen in the product.

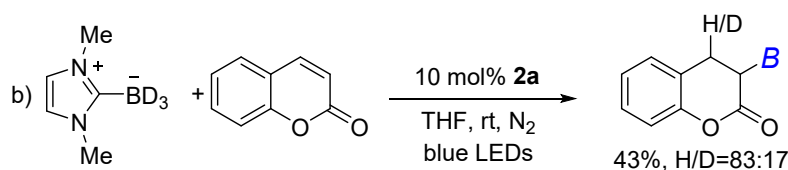

A 10 mL Schlenk-tube was charged with coumarin (14.6 mg, 0.1 mmol, 1.0 equiv.), NHC-BD<sub>3</sub> (14.7 mg, 0.13 mmol, 1.3 equiv.) and 2,4,6-triisopropyl-thiophenol (2.4 mg, 0.01 mmol, 0.1 equiv.) in THF (1.5 mL) with magnetic stirring under N<sub>2</sub> atmosphere. The tube was placed at a distance (app. 5 cm) from 10W blue LEDs (410-420 nm) lamp and the mixture was stirred for 24 h at room temperature. The solvent was evaporated under the reduced pressure and detected by <sup>1</sup>H NMR, indicating 17% (based on the integration value in <sup>1</sup>H NMR spectrum) deuterium hydrogen at the β-position of the product.

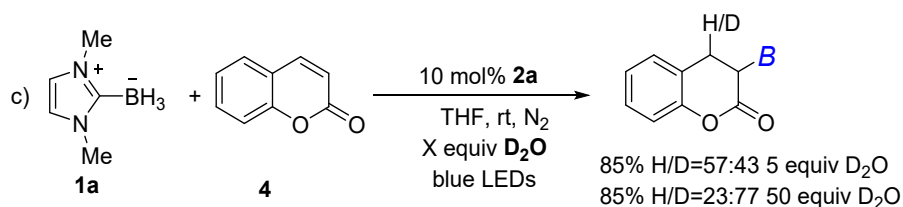

A 10 mL Schlenk-tube was charged with coumarin (29.2 mg, 0.2 mmol, 1.0 equiv.), NHC-BH<sub>3</sub> (28.6 mg, 0.26 mmol, 1.3 equiv.), 2,4,6-triisopropyl-thiophenol (4.7 mg, 0.02 mmol, 0.1 equiv.) and 5 or 50 Equiv. D<sub>2</sub>O in THF (1.5 mL) with magnetic stirring

under N<sub>2</sub> atmosphere. The tube was placed at a distance (app. 5 cm) from 10W blue LEDs (410-420 nm) and the mixture was stirred for 24 h at room temperature. The reaction mixture was dried over anhydrous Na<sub>2</sub>SO<sub>4</sub>, extracted with DCM (3 × 10 mL), and evaporated under reduced pressure. The data was detected by <sup>1</sup>H NMR, indicating 43% (based on the integration value in <sup>1</sup>H NMR spectrum) deuterium hydrogen at the β-position of the product when the reaction was added 5 Equiv. D<sub>2</sub>O and 77% deuterium hydrogen at the β-position of the product when the reaction was added 50 Equiv. D<sub>2</sub>O.

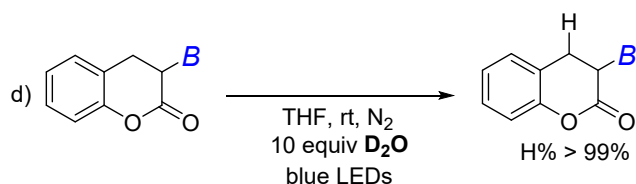

A 10 mL Schlenk-tube was charged with **5a** (51.2 mg, 0.2 mmol, 1.0 equiv.), 10 Equiv. D<sub>2</sub>O (20 mg, 1 mmol, 10 equiv.) in THF (1.5 mL) with magnetic stirring under N<sub>2</sub> atmosphere. The tube was placed at a distance (app. 5 cm) from 10W blue LEDs (410-420 nm) and the mixture was stirred for 24 h at room temperature. The reaction mixture was dried over anhydrous Na<sub>2</sub>SO<sub>4</sub>, extracted with DCM (3 × 10 mL), and evaporated under reduced pressure. The data was detected by <sup>1</sup>H NMR, indicating no deuterium hydrogen in the product.

#### (IV) Formation of disulphide

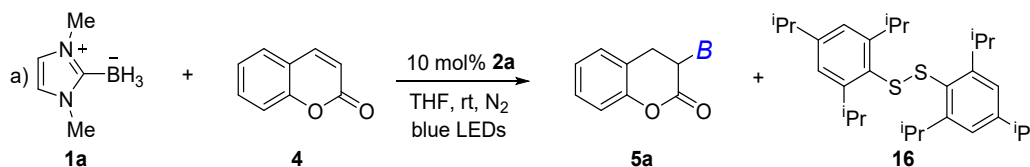

A 10 mL Schlenk-tube was charged with coumarin (29.2 mg, 0.2 mmol, 1.0 equiv), NHC-boranes (28.6 mg, 0.26 mmol, 1.3 equiv) and 2,4,6-triisopropyl-thiophenol (4.7 mg, 0.02 mmol, 0.1 equiv) in THF (1.5 mL) with magnetic stirring under N<sub>2</sub> atmosphere. We cannot detect the disulfide compound **16** by TLC, nevertheless, we can detect the boryl sulphide **3** by TLC in the reaction process. Fortunately, we detected the disulphide compound **16** by HRMS in the reaction process. These data further support our proposed mechanism.

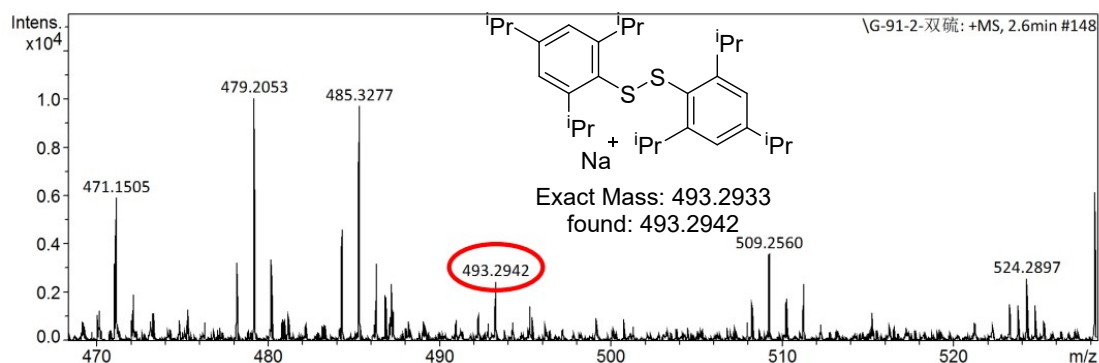



Figure S10. HRMS data of the disulphide **16** of the reaction mixture

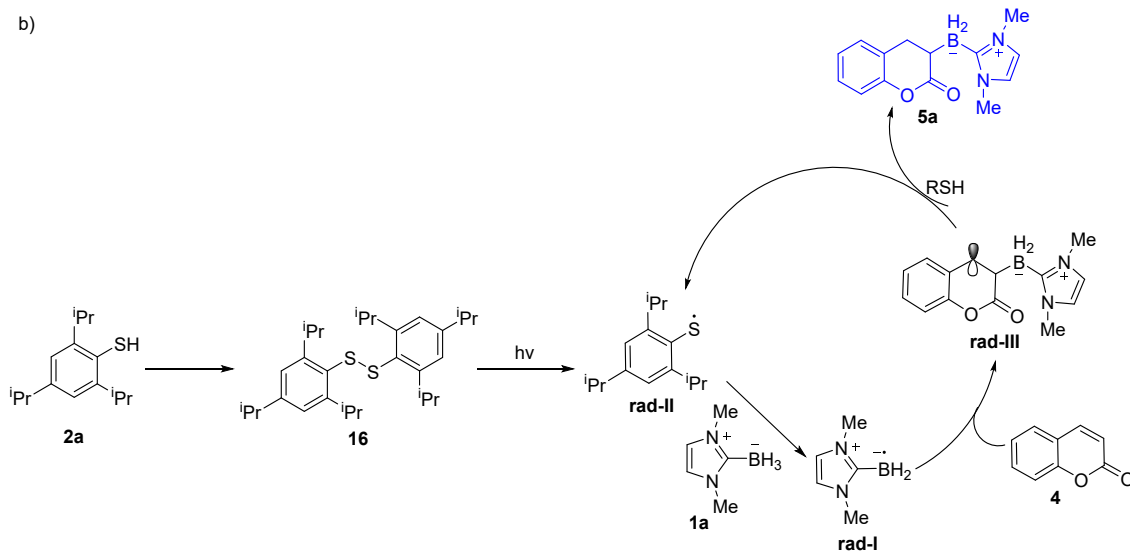

Figure S11. Disulphide mechanism

At this stage, we could not rule out another pathway through disulphide compounds (Figure S8). However, the absence of mediators for S-S bond formation and failure of isolation of disulphide species may at least insinuate this pathway is not a major route for the formation of the products.

## 7. Characterization data of products.

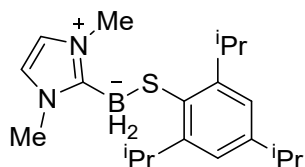

(1,3-dimethyl-1H-imidazol-3-ium-2-yl)((2,4,6-triisopropylphenyl)thio)dihydroborate (**3**): Colorless liquid (227 mg, 44% yield); Gradient eluent: EtOAc/petroleum ether: 1/1 to 2/1.

<sup>1</sup>H NMR (600 MHz, CDCl<sub>3</sub>) δ 6.83 (s, 2H), 6.72 (s, 2H), 3.83 (dq, *J* = 13.8, 6.9 Hz, 2H), 3.38 (s, 6H), 2.81 (dq, *J* = 13.8, 6.9 Hz, 1H), 2.36 (dd, *J* = 175.1, 69.5 Hz, 2H), 1.21 (d, *J* = 6.9 Hz, 6H), 1.09 (d, *J* = 6.9 Hz, 12H).

<sup>13</sup>C NMR (151 MHz, CDCl<sub>3</sub>) δ 152.21, 146.07, 135.24, 120.41, 120.37, 35.47, 34.15, 31.21, 24.26, 24.19. <sup>11</sup>B NMR (193 MHz, CDCl<sub>3</sub>) δ -23.23 (t, *J* = 96.9 Hz).

<sup>11</sup>B{<sup>1</sup>H} NMR (193 MHz, CDCl<sub>3</sub>) δ -23.31.

<sup>1</sup>H{<sup>11</sup>B} NMR (600 MHz, CDCl<sub>3</sub>) δ 6.83 (s, 2H), 6.72 (s, 2H), 3.84 (hept, *J* = 6.9 Hz, 2H), 3.39 (s, 6H), 2.81 (dq, *J* = 13.8, 6.9 Hz, 1H), 2.37 (s, 2H), 1.21 (d, *J* = 6.9 Hz, 6H), 1.09 (d, *J* = 6.9 Hz, 12H).

HRMS (ESI-TOF) *m/z*: [M + Na]<sup>+</sup> cauld. for C<sub>20</sub>H<sub>33</sub>BN<sub>2</sub>NaS 367.2355; found: 367.2343.

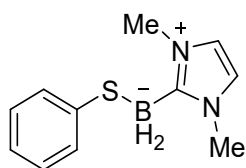

(1,3-dimethyl-1H-imidazol-3-ium-2-yl)(phenylthio)dihydroborate (**3-Ph**): Colorless liquid (11 mg, 25% yield); Gradient eluent: EtOAc/petroleum ether: 1/4 to 1/2.

$^1\text{H NMR}$  (600 MHz,  $\text{CDCl}_3$ )  $\delta$  7.36 (d,  $J = 7.2$  Hz, 2H), 7.10 (t,  $J = 7.7$  Hz, 2H), 6.98 (t,  $J = 7.3$  Hz, 1H), 6.81 (s, 2H), 3.73 (s, 6H), 2.85 – 2.33 (m, 2H).

$^{13}\text{C NMR}$  (151 MHz,  $\text{CDCl}_3$ )  $\delta$  142.68, 131.18, 127.95, 123.37, 120.82, 36.15.

$^{11}\text{B NMR}$  (193 MHz,  $\text{CDCl}_3$ )  $\delta$  -24.38 (t,  $J = 100.4$  Hz).

$^{11}\text{B}\{^1\text{H}\}$  NMR (193 MHz,  $\text{CDCl}_3$ )  $\delta$  -24.38.  $^1\text{H}\{^{11}\text{B}\}$  NMR (600 MHz,  $\text{CDCl}_3$ )  $\delta$  7.36 (d,  $J = 7.2$  Hz, 2H), 7.10 (t,  $J = 7.7$  Hz, 2H), 6.98 (t,  $J = 7.3$  Hz, 1H), 6.81 (s, 2H), 3.73 (s, 6H), 2.62 (s, 2H).

Characterization agrees with previous reports for this compound.<sup>14</sup>

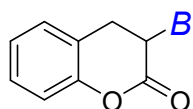

(1,3-dimethyl-1H-imidazol-3-ium-2-yl)(2-oxochroman-3-yl)dihydroborate(**5a**): White solid (450 mg, 88% yield).

$^1\text{H NMR}$  (600 MHz,  $\text{CDCl}_3$ )  $\delta$  7.14 (dd,  $J = 16.3, 7.7$  Hz, 2H), 7.01 (t,  $J = 6.9$  Hz, 1H), 6.91 (d,  $J = 7.9$  Hz, 1H), 6.78 (s, 2H), 3.69 (s, 6H), 3.26 (d,  $J = 14.0$  Hz, 1H), 2.74 (d,  $J = 15.2$  Hz, 1H), 2.39 (s, 1H), 1.56 – 1.19 (m, 2H).

$^{13}\text{C NMR}$  (151 MHz,  $\text{CDCl}_3$ )  $\delta$  178.26, 152.38, 128.46, 126.82, 124.08, 123.32, 120.67, 115.44, 35.99, 30.64.

$^{11}\text{B NMR}$  (193 MHz,  $\text{CDCl}_3$ )  $\delta$  -25.86 (t,  $J = 92.1$  Hz).

$^{11}\text{B}\{^1\text{H}\}$  NMR (193 MHz,  $\text{CDCl}_3$ )  $\delta$  -26.09.

$^1\text{H}\{^{11}\text{B}\}$  NMR (600 MHz,  $\text{CDCl}_3$ )  $\delta$  7.14 (dd,  $J = 16.3, 7.8$  Hz, 2H), 7.01 (t,  $J = 7.4$  Hz, 1H), 6.90 (d,  $J = 8.0$  Hz, 1H), 6.78 (s, 2H), 3.69 (s, 6H), 3.26 (dd,  $J = 15.2, 6.1$  Hz, 1H), 2.75 (d,  $J = 15.2$  Hz, 1H), 2.39 (dd,  $J = 12.7, 6.1$  Hz, 1H), 1.48 (d,  $J = 37.7$  Hz, 2H).

Characterization agrees with previous reports for this compound.<sup>1</sup>

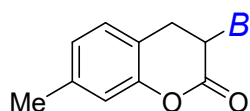

(1,3-dimethyl-1H-imidazol-3-ium-2-yl)(7-methyl-2-oxochroman-3-yl)dihydroborate (**5b**): White solid (480 mg, 89% yield).

$^1\text{H NMR}$  (600 MHz,  $\text{CDCl}_3$ )  $\delta$  6.96 (s, 1H), 6.92 (d,  $J = 8.2$  Hz, 1H), 6.79 (d,  $J = 8.3$  Hz, 1H), 6.78 (s, 2H), 3.68 (s, 6H), 3.22 (d,  $J = 12.0$  Hz, 1H), 2.69 (d,  $J = 15.2$  Hz, 1H), 2.35 (s, 1H), 2.29 (s, 3H), 1.58 – 1.18 (m, 2H).

$^{13}\text{C}$  NMR (151 MHz,  $\text{CDCl}_3$ )  $\delta$  178.49, 150.27, 132.62, 129.03, 127.25, 123.70, 120.62, 115.14, 35.99, 30.67, 20.80.

$^{11}\text{B}$  NMR (193 MHz,  $\text{CDCl}_3$ ) -26.08 (t,  $J = 91.2$  Hz).  $^{11}\text{B}\{^1\text{H}\}$  NMR (193 MHz,  $\text{CDCl}_3$ )  $\delta$  -26.08.

$^1\text{H}\{^{11}\text{B}\}$  NMR (600 MHz,  $\text{CDCl}_3$ )  $\delta$  6.96 (s, 1H), 6.92 (d,  $J = 8.1$  Hz, 1H), 6.80 (d,  $J = 4.8$  Hz, 1H), 6.78 (s, 2H), 3.68 (s, 6H), 3.22 (dd,  $J = 15.2, 6.2$  Hz, 1H), 2.69 (d,  $J = 15.2$  Hz, 1H), 2.35 (dd,  $J = 13.0, 6.0$  Hz, 1H), 2.29 (s, 3H), 1.48 (d,  $J = 41.6$  Hz, 2H).

HRMS (ESI-TOF)  $m/z$ :  $[\text{M} + \text{Na}]^+$  cacl. for  $\text{C}_{15}\text{H}_{19}\text{BN}_2\text{NaO}_2$  293.1437; found: 293.1434.

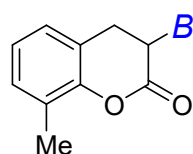

(1,3-dimethyl-1H-imidazol-3-ium-2-yl)(8-methyl-2-oxochroman-3-yl)dihydroborate (5c): White solid (415 mg, 77% yield).

$^1\text{H}$  NMR (600 MHz,  $\text{CDCl}_3$ )  $\delta$  6.98 (d,  $J = 7.3$  Hz, 2H), 6.90 (t,  $J = 7.4$  Hz, 1H), 6.77 (s, 2H), 3.68 (s, 6H), 3.25 (d,  $J = 14.2$  Hz, 1H), 2.71 (d,  $J = 15.2$  Hz, 1H), 2.39 (s, 1H), 2.25 (s, 3H), 1.59 – 1.19 (m, 2H).

$^{13}\text{C}$  NMR (151 MHz,  $\text{CDCl}_3$ )  $\delta$  178.48, 150.51, 128.37, 125.98, 124.38, 123.70, 122.79, 120.63, 35.95, 30.83, 15.82.

$^{11}\text{B}$  NMR (193 MHz,  $\text{CDCl}_3$ )  $\delta$  -26.17 (t,  $J = 90.7$  Hz).

$^{11}\text{B}\{^1\text{H}\}$  NMR (193 MHz,  $\text{CDCl}_3$ )  $\delta$  -26.17.

$^1\text{H}\{^{11}\text{B}\}$  NMR (600 MHz,  $\text{CDCl}_3$ )  $\delta$  6.97 (s, 2H), 6.89 (dd,  $J = 13.0, 6.2$  Hz, 1H), 6.76 (d,  $J = 2.6$  Hz, 2H), 3.66 (dd,  $J = 7.2, 3.2$  Hz, 6H), 3.23 (d,  $J = 15.1$  Hz, 1H), 2.69 (d,  $J = 15.1$  Hz, 1H), 2.38 (s, 1H), 2.24 (s, 3H), 1.47 (d,  $J = 48.9$  Hz, 2H).

HRMS (ESI-TOF)  $m/z$ :  $[\text{M} + \text{Na}]^+$  cacl. for  $\text{C}_{15}\text{H}_{19}\text{BN}_2\text{NaO}_2$  293.1437; found: 293.1431.

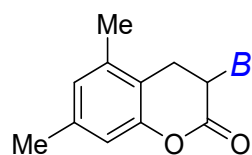

(1,3-dimethyl-1H-imidazol-3-ium-2-yl)(5,7-dimethyl-2-oxochroman-3-yl)dihydroborate (5d): White solid (375 mg, 66% yield).

$^1\text{H}$  NMR (600 MHz,  $\text{CDCl}_3$ )  $\delta$  6.79 (s, 2H), 6.71 (s, 1H), 6.58 (s, 1H), 3.68 (s, 6H), 2.97 (d,  $J = 11.4$  Hz, 1H), 2.78 (d,  $J = 15.5$  Hz, 1H), 2.37 (s, 1H), 2.26 (s, 3H), 2.23 (s, 3H), 1.62 – 1.26 (m, 2H).

$^{13}\text{C}$  NMR (151 MHz,  $\text{CDCl}_3$ )  $\delta$  178.55, 152.32, 136.12, 136.10, 125.76, 120.60, 119.29, 113.87, 35.98, 27.69, 21.02, 19.17.

$^{11}\text{B}$  NMR (193 MHz,  $\text{CDCl}_3$ )  $\delta$  -25.81 (t,  $J = 91.5$  Hz).

$^{11}\text{B}\{^1\text{H}\}$  NMR (193 MHz,  $\text{CDCl}_3$ )  $\delta$  -25.81.

$^1\text{H}\{^{11}\text{B}\}$  NMR (600 MHz,  $\text{CDCl}_3$ )  $\delta$  6.79 (s, 2H), 6.71 (s, 1H), 6.57 (s, 1H), 3.68 (s, 6H), 2.97 (dd,  $J = 15.4, 6.1$  Hz, 1H), 2.78 (d,  $J = 15.5$  Hz, 1H), 2.37 (d,  $J = 6.3$  Hz, 1H), 2.26 (s, 3H), 2.23 (s, 3H), 1.50 (s, 2H).

HRMS (ESI-TOF)  $m/z$ :  $[\text{M} + \text{Na}]^+$  cacl. for  $\text{C}_{16}\text{H}_{21}\text{BN}_2\text{NaO}_2$  307.1594; found: 307.1593.

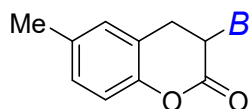

(1,3-dimethyl-1H-imidazol-3-ium-2-yl)(6-methyl-2-oxochroman-3-yl)dihydroborate (**5e**): White solid (470 mg, 87% yield).

$^1\text{H}$  NMR (600 MHz,  $\text{CDCl}_3$ )  $\delta$  6.96 (s, 1H), 6.92 (d,  $J = 8.2$  Hz, 1H), 6.79 (d,  $J = 8.3$  Hz, 1H), 6.78 (s, 2H), 3.68 (s, 6H), 3.22 (d,  $J = 12.0$  Hz, 1H), 2.69 (d,  $J = 15.2$  Hz, 1H), 2.35 (s, 1H), 2.29 (s, 3H), 1.65 – 1.13 (m, 2H).

$^{13}\text{C}$  NMR (151 MHz,  $\text{CDCl}_3$ )  $\delta$  178.49, 150.27, 132.62, 129.03, 127.25, 123.70, 120.62, 115.14, 35.99, 30.67, 20.80.

$^{11}\text{B}$  NMR (193 MHz,  $\text{CDCl}_3$ )  $\delta$  -25.85 (d,  $J = 91.2$  Hz).

$^{11}\text{B}\{^1\text{H}\}$  NMR (193 MHz,  $\text{CDCl}_3$ )  $\delta$  -26.32.

$^1\text{H}\{^{11}\text{B}\}$  NMR (600 MHz,  $\text{CDCl}_3$ )  $\delta$  6.96 (s, 1H), 6.92 (d,  $J = 8.1$  Hz, 1H), 6.80 (d,  $J = 4.5$  Hz, 1H), 6.78 (s, 2H), 3.68 (s, 6H), 3.22 (dd,  $J = 15.2, 6.2$  Hz, 1H), 2.69 (d,  $J = 15.2$  Hz, 1H), 2.35 (dd,  $J = 13.0, 6.0$  Hz, 1H), 2.29 (s, 3H), 1.48 (d,  $J = 41.6$  Hz, 2H).

Characterization agrees with previous reports for this compound.<sup>4</sup>

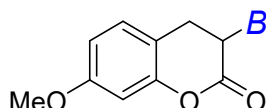

(1,3-dimethyl-1H-imidazol-3-ium-2-yl)(7-methoxy-2-oxochroman-3-yl)dihydroborate (**5f**): White solid (516 mg, 90% yield).

$^1\text{H}$  NMR (600 MHz,  $\text{CDCl}_3$ )  $\delta$  7.04 (d,  $J = 8.1$  Hz, 1H), 6.79 (s, 2H), 6.58 (d,  $J = 8.1$  Hz, 1H), 6.49 (s, 1H), 3.77 (s, 3H), 3.69 (s, 6H), 3.18 (d,  $J = 11.0$  Hz, 1H), 2.67 (d,  $J = 14.7$  Hz, 1H), 2.35 (s, 1H), 1.76 – 1.24 (m, 2H).

$^{13}\text{C}$  NMR (151 MHz,  $\text{CDCl}_3$ )  $\delta$  178.17, 158.65, 153.01, 128.76, 120.62, 116.06, 108.84, 101.59, 55.40, 36.02, 29.89.

$^{11}\text{B}$  NMR (193 MHz,  $\text{CDCl}_3$ )  $\delta$  -26.00 (t,  $J = 91.1$  Hz).

$^{11}\text{B}\{^1\text{H}\}$  NMR (193 MHz,  $\text{CDCl}_3$ )  $\delta$  -26.00.  $^1\text{H}\{^{11}\text{B}\}$  NMR (600 MHz,  $\text{CDCl}_3$ )  $\delta$  7.04 (d,  $J = 8.0$  Hz, 1H), 6.58 (d,  $J = 8.0$  Hz, 1H), 6.49 (s, 1H), 3.77 (s, 3H), 3.69 (s, 6H), 3.18 (d,  $J = 14.8$  Hz, 1H), 2.67 (d,  $J = 14.8$  Hz, 1H), 2.35 (s, 1H), 1.49 (d,  $J = 28.8$  Hz, 2H).

HRMS (ESI-TOF)  $m/z$ :  $[\text{M} + \text{Na}]^+$  cacl. for  $\text{C}_{15}\text{H}_{19}\text{BN}_2\text{NaO}_3$  309.1386; found: 309.1377.

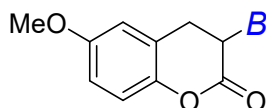

(1,3-dimethyl-1H-imidazol-3-ium-2-yl)(6-methoxy-2-oxochroman-3-yl)dihydroborate (**5g**): White solid (516 mg, 90% yield).

$^1\text{H NMR}$  (600 MHz,  $\text{CDCl}_3$ )  $\delta$  6.83 (d,  $J = 8.7$  Hz, 1H), 6.79 (s, 2H), 6.70 (s, 1H), 6.67 (d,  $J = 8.7$  Hz, 1H), 3.77 (s, 3H), 3.68 (s, 6H), 3.23 (d,  $J = 11.7$  Hz, 1H), 2.69 (d,  $J = 15.2$  Hz, 1H), 2.34 (s, 1H), 1.70 – 1.24 (m, 2H).

$^{13}\text{C NMR}$  (151 MHz,  $\text{CDCl}_3$ )  $\delta$  178.45, 155.46, 146.42, 125.03, 120.64, 116.01, 113.53, 111.95, 55.57, 35.99, 31.02.

$^{11}\text{B NMR}$  (193 MHz,  $\text{CDCl}_3$ )  $\delta$  -26.12 (t,  $J = 91.8$  Hz).

$^{11}\text{B}\{^1\text{H}\}$  NMR (193 MHz,  $\text{CDCl}_3$ )  $\delta$  -26.13.

$^1\text{H}\{^{11}\text{B}\}$  NMR (600 MHz,  $\text{CDCl}_3$ )  $\delta$  6.83 (d,  $J = 8.6$  Hz, 1H), 6.79 (s, 2H), 6.69 (s, 1H), 6.67 (d,  $J = 8.6$  Hz, 1H), 3.77 (s, 3H), 3.69 (s, 6H), 3.23 (d,  $J = 15.2$  Hz, 1H), 2.69 (d,  $J = 15.2$  Hz, 1H), 2.34 (s, 1H), 1.47 (d,  $J = 37.9$  Hz, 2H).

HRMS (ESI-TOF)  $m/z$ :  $[\text{M} + \text{Na}]^+$  cacl. for  $\text{C}_{15}\text{H}_{19}\text{BN}_2\text{NaO}_3$  309.1386; found: 309.1381.

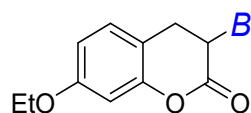

(1,3-dimethyl-1H-imidazol-3-ium-2-yl)(7-ethoxy-2-oxochroman-3-yl)dihydroborate (**5h**): White solid (482 mg, 80% yield).

$^1\text{H NMR}$  (600 MHz,  $\text{CDCl}_3$ )  $\delta$  7.02 (d,  $J = 8.2$  Hz, 1H), 6.78 (s, 2H), 6.56 (dd,  $J = 8.2$ , 2.4 Hz, 1H), 6.48 (d,  $J = 2.3$  Hz, 1H), 3.99 (q,  $J = 7.0$  Hz, 2H), 3.68 (s, 6H), 3.17 (d,  $J = 10.1$  Hz, 1H), 2.65 (d,  $J = 14.9$  Hz, 1H), 2.36 (s, 1H), 1.85 – 1.40 (m, 2H), 1.39 (t,  $J = 7.0$  Hz, 3H).

$^{13}\text{C NMR}$  (151 MHz,  $\text{CDCl}_3$ )  $\delta$  178.23, 158.00, 152.97, 128.72, 120.62, 115.92, 109.43, 102.12, 63.57, 36.01, 29.88, 14.84.

$^{11}\text{B NMR}$  (193 MHz,  $\text{CDCl}_3$ )  $\delta$  -26.01 (t,  $J = 90.9$  Hz).

$^{11}\text{B}\{^1\text{H}\}$  NMR (193 MHz,  $\text{CDCl}_3$ )  $\delta$  -26.01.

$^1\text{H}\{^{11}\text{B}\}$  NMR (600 MHz,  $\text{CDCl}_3$ )  $\delta$  7.02 (d,  $J = 8.2$  Hz, 1H), 6.78 (s, 2H), 6.56 (d,  $J = 8.2$  Hz, 1H), 6.48 (s, 1H), 3.99 (q,  $J = 6.9$  Hz, 2H), 3.68 (s, 6H), 3.17 (dd,  $J = 14.9$ , 6.1 Hz, 1H), 2.65 (d,  $J = 14.9$  Hz, 1H), 2.35 (dd,  $J = 12.3$ , 6.0 Hz, 1H), 1.49 (dd,  $J = 21.2$ , 9.8 Hz, 2H), 1.39 (t,  $J = 7.0$  Hz, 3H).

HRMS (ESI-TOF)  $m/z$ :  $[\text{M} + \text{Na}]^+$  cacl. for  $\text{C}_{16}\text{H}_{21}\text{BN}_2\text{NaO}_3$  323.1543; found: 323.1536.

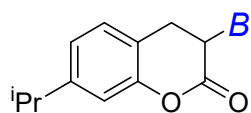

(1,3-dimethyl-1H-imidazol-3-ium-2-yl)(7-isopropyl-2-oxochroman-3-yl)dihydroborate (**5i**): White solid (482 mg, 80% yield).

$^1\text{H NMR}$  (600 MHz,  $\text{CDCl}_3$ )  $\delta$  7.05 (d,  $J = 7.6$  Hz, 1H), 6.87 (d,  $J = 7.6$  Hz, 1H), 6.76 (s, 2H), 6.75 (s, 1H), 3.68 (s, 6H), 3.21 (d,  $J = 11.9$  Hz, 1H), 2.85 (dt,  $J = 13.8$ , 6.9 Hz, 1H), 2.70 (d,  $J = 15.2$  Hz, 1H), 2.38 (s, 1H), 1.61 (s, 2H), 1.23 (s, 3H), 1.22 (s, 3H).

$^{13}\text{C}$  NMR (151 MHz,  $\text{CDCl}_3$ )  $\delta$  178.48, 152.28, 147.93, 128.09, 121.36, 121.11, 120.58, 113.38, 36.03, 33.69, 30.37, 24.00, 23.96.  $^{11}\text{B}$  NMR (193 MHz,  $\text{CDCl}_3$ )  $\delta$  -25.94 (t,  $J = 92.0$  Hz).

$^{11}\text{B}$  NMR (193 MHz,  $\text{CDCl}_3$ )  $\delta$  -25.94 (t,  $J = 91.7$  Hz).

$^{11}\text{B}\{^1\text{H}\}$  NMR (193 MHz,  $\text{CDCl}_3$ )  $\delta$  -25.94.

$^1\text{H}\{^{11}\text{B}\}$  NMR (600 MHz,  $\text{CDCl}_3$ )  $\delta$  7.05 (d,  $J = 7.6$  Hz, 1H), 6.87 (d,  $J = 7.6$  Hz, 1H), 6.76 (s, 2H), 6.75 (s, 1H), 3.68 (s, 6H), 3.21 (dd,  $J = 15.1, 6.2$  Hz, 1H), 2.85 (dt,  $J = 13.8, 6.9$  Hz, 1H), 2.70 (d,  $J = 15.2$  Hz, 1H), 2.38 (dd,  $J = 12.2, 6.0$  Hz, 1H), 1.51 (d,  $J = 32.4$  Hz, 2H), 1.23 (s, 3H), 1.22 (s, 3H).

HRMS (ESI-TOF)  $m/z$ :  $[\text{M} + \text{Na}]^+$  calcd. for  $\text{C}_{17}\text{H}_{23}\text{BN}_2\text{NaO}_2$  321.1750; found: 321.1741.

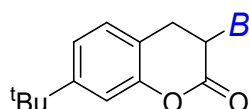

(7-(tert-butyl)-2-oxochroman-3-yl)(1,3-dimethyl-1H-imidazol-3-ium-2-yl) dihydroborate (**5j**): White solid (312 mg, 63% yield).

$^1\text{H}$  NMR (600 MHz,  $\text{CDCl}_3$ )  $\delta$  7.03 (d,  $J = 19.1$  Hz, 2H), 6.90 (s, 1H), 6.75 (s, 2H), 3.67 (s, 6H), 3.20 (d,  $J = 7.8$  Hz, 1H), 2.69 (d,  $J = 14.4$  Hz, 1H), 2.38 (s, 1H), 1.64 (dd,  $J = 83.1, 34.0$  Hz, 2H), 1.28 (s, 9H).

$^{13}\text{C}$  NMR (151 MHz,  $\text{CDCl}_3$ )  $\delta$  178.48, 152.09, 150.34, 127.79, 120.74, 120.61, 120.19, 112.56, 36.02, 34.49, 31.36, 30.28.

$^{11}\text{B}$  NMR (193 MHz,  $\text{CDCl}_3$ )  $\delta$  -25.94 (t,  $J = 92.6$  Hz).

$^{11}\text{B}\{^1\text{H}\}$  NMR (193 MHz,  $\text{CDCl}_3$ )  $\delta$  -25.92.

$^1\text{H}\{^{11}\text{B}\}$  NMR (600 MHz,  $\text{CDCl}_3$ )  $\delta$  7.03 (d,  $J = 19.2$  Hz, 2H), 6.89 (s, 1H), 6.75 (s, 2H), 3.67 (s, 6H), 3.20 (d,  $J = 9.9$  Hz, 1H), 2.69 (d,  $J = 14.9$  Hz, 1H), 2.38 (s, 1H), 1.50 (d,  $J = 29.5$  Hz, 2H), 1.28 (s, 9H).

HRMS (ESI-TOF)  $m/z$ :  $[\text{M} + \text{Na}]^+$  calcd. for  $\text{C}_{18}\text{H}_{25}\text{BN}_2\text{NaO}_2$  335.1907; found: 335.1897.

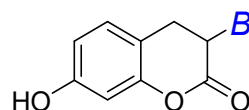

(1,3-dimethyl-1H-imidazol-3-ium-2-yl)(7-hydroxy-2-oxochroman-3-yl)dihydroborate (**5k**): White solid (480 mg, 88% yield).

$^1\text{H}$  NMR (600 MHz, DMSO)  $\delta$  7.27 (s, 2H), 6.84 (d,  $J = 8.1$  Hz, 1H), 6.36 (dd,  $J = 8.1, 2.3$  Hz, 1H), 6.21 (d,  $J = 2.3$  Hz, 1H), 3.83 (s, 1H), 3.54 (s, 6H), 2.95 (dd,  $J = 14.8, 5.7$  Hz, 1H), 2.32 (d,  $J = 14.8$  Hz, 1H), 2.15 (d,  $J = 5.6$  Hz, 1H), 1.49 – 1.09 (m, 2H).

$^{13}\text{C}$  NMR (151 MHz, DMSO)  $\delta$  176.87, 153.24, 128.91, 123.91, 121.72, 113.27, 110.82, 102.85, 35.73, 29.54.

$^{11}\text{B}$  NMR (193 MHz, DMSO)  $\delta$  -25.54 (t,  $J = 89.9$  Hz).

$^{11}\text{B}\{^1\text{H}\}$  NMR (193 MHz, DMSO)  $\delta$  -25.82.

$^1\text{H}\{^{11}\text{B}\}$  NMR (600 MHz, DMSO)  $\delta$  7.27 (s, 2H), 6.84 (d,  $J = 8.1$  Hz, 1H), 6.36 (dd,  $J = 8.1, 2.3$  Hz, 1H), 6.21 (d,  $J = 2.3$  Hz, 1H), 3.84 (s, 1H), 3.55 (s, 6H), 2.97 – 2.92 (m,

1H), 2.32 (d,  $J = 14.8$  Hz, 1H), 2.15 (dd,  $J = 11.5, 5.7$  Hz, 1H), 1.35 (s, 2H).

**HRMS (ESI-TOF)**  $m/z$ :  $[M + Na]^+$  cacl. for  $C_{14}H_{17}BN_2NaO_3$  295.1230; found: 295.1220.

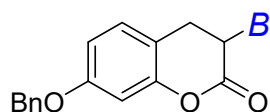

(7-(benzyloxy)-2-oxochroman-3-yl)(1,3-dimethyl-1H-imidazol-3-ium-2-yl) dihydroborate (**5l**): White solid (631 mg, 87% yield).

**$^1H$  NMR (600 MHz,  $CDCl_3$ )**  $\delta$  7.43 (d,  $J = 7.5$  Hz, 2H), 7.38 (t,  $J = 7.5$  Hz, 2H), 7.32 (t,  $J = 7.3$  Hz, 1H), 7.04 (d,  $J = 8.2$  Hz, 1H), 6.75 (s, 2H), 6.66 (dd,  $J = 8.3, 2.5$  Hz, 1H), 6.56 (d,  $J = 2.5$  Hz, 1H), 5.03 (s, 2H), 3.67 (s, 6H), 3.18 (d,  $J = 16.6$  Hz, 1H), 2.67 (d,  $J = 15.0$  Hz, 1H), 2.37 (d,  $J = 4.3$  Hz, 1H), 1.60 – 1.17 (m, 2H).

**$^{13}C$  NMR (151 MHz,  $CDCl_3$ )**  $\delta$  178.21, 157.79, 152.96, 137.04, 128.79, 128.57, 127.95, 127.57, 120.61, 116.39, 109.89, 102.55, 70.15, 36.01, 29.90.

**$^{11}B$  NMR (193 MHz,  $CDCl_3$ )**  $\delta$  -26.02 (t,  $J = 89.8$  Hz).

**$^{11}B\{^1H\}$  NMR (193 MHz,  $CDCl_3$ )**  $\delta$  -26.01.

**$^1H\{^{11}B\}$  NMR (600 MHz,  $CDCl_3$ )**  $\delta$  7.43 (d,  $J = 7.3$  Hz, 2H), 7.38 (t,  $J = 7.5$  Hz, 2H), 7.32 (t,  $J = 7.3$  Hz, 1H), 7.04 (d,  $J = 8.2$  Hz, 1H), 6.75 (s, 2H), 6.66 (dd,  $J = 8.2, 2.4$  Hz, 1H), 6.55 (d,  $J = 2.4$  Hz, 1H), 5.03 (s, 2H), 3.67 (s, 6H), 3.18 (dd,  $J = 14.9, 6.1$  Hz, 1H), 2.67 (d,  $J = 15.0$  Hz, 1H), 2.37 (dd,  $J = 12.4, 6.0$  Hz, 1H), 1.49 (d,  $J = 34.2$  Hz, 2H). **HRMS (ESI-TOF)**  $m/z$ :  $[M + Na]^+$  cacl. for  $C_{21}H_{23}BN_2NaO_3$  385.1699; found: 385.1687.

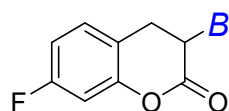

(1,3-dimethyl-1H-imidazol-3-ium-2-yl)(7-fluoro-2-oxochroman-3-yl) dihydroborate (**5m**): White solid (438 mg, 80% yield).

**$^1H$  NMR (600 MHz,  $CDCl_3$ )**  $\delta$  7.09 (t,  $J = 6$  Hz, 1H), 6.80 (s, 2H), 6.73 (t,  $J = 8.4$  Hz, 1H), 6.65 (d,  $J = 9.5$  Hz, 1H), 3.69 (s, 6H), 3.20 (d,  $J = 11.7$  Hz, 1H), 2.72 (d,  $J = 15.0$  Hz, 1H), 2.36 (s, 1H), 1.73 – 1.25 (m, 2H).

**$^{13}C$  NMR (151 MHz,  $CDCl_3$ )**  $\delta$  177.50, 161.50 (d,  $J = 11.7$  Hz), 152.96 (d,  $J = 12.0$  Hz), 129.09 (d,  $J = 9.1$  Hz), 120.73, 119.77 (d,  $J = 3.0$  Hz), 109.90 (d,  $J = 21.1$  Hz), 103.24 (d,  $J = 25.7$  Hz), 35.99, 30.01.

**$^{11}B$  NMR (193 MHz,  $CDCl_3$ )**  $\delta$  -26.08 (t,  $J = 91.4$  Hz).

**$^{11}B\{^1H\}$  NMR (193 MHz,  $CDCl_3$ )**  $\delta$  -26.08.

**$^1H\{^{11}B\}$  NMR (600 MHz,  $CDCl_3$ )**  $\delta$  7.09 (t,  $J = 6$  Hz, 1H), 6.80 (s, 2H), 6.72 (td,  $J = 8.4, 2.4$  Hz, 1H), 6.65 (dd,  $J = 9.5, 2.4$  Hz, 1H), 3.69 (s, 6H), 3.20 (dd,  $J = 15.0, 6.0$  Hz, 1H), 2.72 (d,  $J = 15.1$  Hz, 1H), 2.36 (dd,  $J = 12.8, 5.9$  Hz, 1H), 1.47 (d,  $J = 43.7$  Hz, 2H).

**$^{19}F$  NMR (565 MHz,  $CDCl_3$ )**  $\delta$  -115.82.

**HRMS (ESI-TOF)**  $m/z$ :  $[M + Na]^+$  cacl. for  $C_{14}H_{16}BFN_2NaO_2$  297.1187; found: 297.1185.

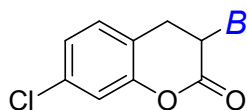

(7-chloro-2-oxochroman-3-yl)(1,3-dimethyl-1H-imidazol-3-ium-2-yl)dihydroborate (**5n**): White solid (516 mg, 89% yield).

$^1\text{H NMR}$  (600 MHz,  $\text{CDCl}_3$ )  $\delta$  7.08 (d,  $J = 8.0$  Hz, 1H), 6.99 (dd,  $J = 8.0, 2.0$  Hz, 1H), 6.92 (d,  $J = 2.0$  Hz, 1H), 6.81 (s, 2H), 3.69 (s, 6H), 3.20 (d,  $J = 13.4$  Hz, 1H), 2.72 (d,  $J = 15.3$  Hz, 1H), 2.35 (s, 1H), 1.74 – 1.35 (m, 2H).

$^{13}\text{C NMR}$  (151 MHz,  $\text{CDCl}_3$ )  $\delta$  177.46, 152.87, 131.78, 129.36, 123.35, 122.74, 120.72, 115.83, 36.02, 30.21.  $^{11}\text{B NMR}$  (193 MHz,  $\text{CDCl}_3$ )  $\delta$  -25.87 (t,  $J = 91.7$  Hz).

$^{11}\text{B}\{^1\text{H}\}$  NMR (193 MHz,  $\text{CDCl}_3$ )  $\delta$  -26.10.

$^1\text{H}\{^{11}\text{B}\}$  NMR (600 MHz,  $\text{CDCl}_3$ )  $\delta$  7.08 (d,  $J = 8.0$  Hz, 1H), 6.99 (dd,  $J = 8.0, 2.0$  Hz, 1H), 6.92 (d,  $J = 1.9$  Hz, 1H), 6.81 (s, 2H), 3.69 (s, 6H), 3.20 (dd,  $J = 15.3, 6.2$  Hz, 1H), 2.72 (d,  $J = 15.3$  Hz, 1H), 2.35 (dd,  $J = 13.4, 5.6$  Hz, 1H), 1.46 (d,  $J = 45.9$  Hz, 2H).

HRMS (ESI-TOF)  $m/z$ :  $[\text{M} + \text{Na}]^+$  cacl. for  $\text{C}_{14}\text{H}_{16}\text{BClN}_2\text{NaO}_2$  313.0891; found: 313.0883.

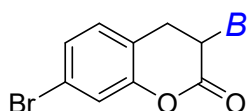

(7-bromo-2-oxochroman-3-yl)(1,3-dimethyl-1H-imidazol-3-ium-2-yl)dihydroborate (**5o**): White solid (560 mg, 89% yield).

$^1\text{H NMR}$  (600 MHz,  $\text{CDCl}_3$ )  $\delta$  7.13 (d,  $J = 7.9$  Hz, 1H), 7.06 (s, 1H), 7.02 (d,  $J = 8.0$  Hz, 1H), 6.81 (s, 2H), 3.69 (s, 6H), 3.17 (d,  $J = 11.4$  Hz, 1H), 2.71 (d,  $J = 15.2$  Hz, 1H), 2.35 (s, 1H), 1.53 (dd,  $J = 146.2, 54.4$  Hz, 2H).

$^{13}\text{C NMR}$  (151 MHz,  $\text{CDCl}_3$ )  $\delta$  177.41, 153.02, 129.75, 126.25, 123.27, 120.73, 119.35, 118.66, 36.02, 30.27.

$^{11}\text{B NMR}$  (193 MHz,  $\text{CDCl}_3$ )  $\delta$  -26.10 (t,  $J = 91.8$  Hz).

$^{11}\text{B}\{^1\text{H}\}$  NMR (193 MHz,  $\text{CDCl}_3$ )  $\delta$  -26.10.

$^1\text{H}\{^{11}\text{B}\}$  NMR (600 MHz,  $\text{CDCl}_3$ )  $\delta$  7.14 (d,  $J = 7.9$  Hz, 1H), 7.07 (s, 1H), 7.03 (d,  $J = 7.9$  Hz, 1H), 6.81 (s, 2H), 3.69 (s, 6H), 3.18 (dd,  $J = 15.3, 5.9$  Hz, 1H), 2.71 (d,  $J = 15.3$  Hz, 1H), 2.36 (d,  $J = 5.8$  Hz, 1H), 1.46 (d,  $J = 43.2$  Hz, 2H).

HRMS (ESI-TOF)  $m/z$ :  $[\text{M} + \text{Na}]^+$  cacl. for  $\text{C}_{14}\text{H}_{16}\text{BBrN}_2\text{NaO}_2$  357.0386; found: 357.0385.

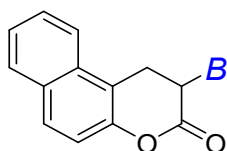

(1,3-dimethyl-1H-imidazol-3-ium-2-yl)(3-oxo-2,3-dihydro-1H-benzo[f]chromen-2-yl)dihydroborate (**5p**): White solid (560 mg, 89% yield).

$^1\text{H NMR}$  (600 MHz,  $\text{CDCl}_3$ )  $\delta$  7.91 (d,  $J = 8.4$  Hz, 1H), 7.80 (d,  $J = 8.1$  Hz, 1H), 7.66 (d,  $J = 8.8$  Hz, 1H), 7.51 (t,  $J = 7.6$  Hz, 1H), 7.39 (t,  $J = 7.4$  Hz, 1H), 7.13 (d,  $J = 8.8$  Hz, 1H), 3.63 (s, 6H), 3.35 (s, 2H), 2.57 (s, 1H), 1.58 (dd,  $J = 172.2, 75.8$  Hz, 2H).



$^{13}\text{C}$  NMR (151 MHz,  $\text{CDCl}_3$ )  $\delta$  178.05, 149.50, 132.22, 130.60, 128.46, 127.49, 126.37, 124.21, 123.27, 120.65, 117.06, 116.41, 35.98, 27.08.

$^{11}\text{B}$  NMR (193 MHz,  $\text{CDCl}_3$ )  $\delta$  -25.46 (t,  $J = 91.6$  Hz).

$^{11}\text{B}\{^1\text{H}\}$  NMR (193 MHz,  $\text{CDCl}_3$ )  $\delta$  -25.45.

$^1\text{H}\{^{11}\text{B}\}$  NMR (600 MHz,  $\text{CDCl}_3$ )  $\delta$  7.91 (d,  $J = 8.4$  Hz, 1H), 7.80 (d,  $J = 8.1$  Hz, 1H), 7.66 (d,  $J = 8.8$  Hz, 1H), 7.51 (t,  $J = 7.6$  Hz, 1H), 7.39 (t,  $J = 7.4$  Hz, 1H), 7.13 (d,  $J = 8.8$  Hz, 1H), 6.73 (s, 2H), 3.63 (s, 6H), 3.35 (s, 2H), 2.57 (s, 1H), 1.57 (d,  $J = 30.5$  Hz, 2H).

HRMS (ESI-TOF)  $m/z$ :  $[\text{M} + \text{Na}]^+$  cacl. for  $\text{C}_{18}\text{H}_{19}\text{BN}_2\text{NaO}_2$  329.1437; found: 329.1431.

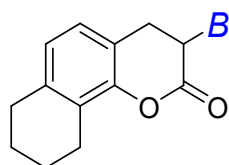

(1,3-dimethyl-1H-imidazol-3-ium-2-yl)(2-oxo-3,4,7,8,9,10-hexahydro-2H-benzo [h]chromen-3-yl)dihydroborate (**5q**): White solid (434 mg, 70% yield).

$^1\text{H}$  NMR (600 MHz,  $\text{CDCl}_3$ )  $\delta$  6.88 (d,  $J = 7.6$  Hz, 1H), 6.76 (s, 2H), 6.74 (d,  $J = 7.6$  Hz, 1H), 3.68 (s, 6H), 3.20 (d,  $J = 11.8$  Hz, 1H), 2.78 (dd,  $J = 17.3, 6.0$  Hz, 1H), 2.73 (s, 2H), 2.67 (d,  $J = 15.1$  Hz, 1H), 2.58 (dd,  $J = 18.1, 5.7$  Hz, 1H), 2.35 (s, 1H), 1.79 – 1.72 (m, 4H), 1.65 – 1.22 (m, 2H).

$^{13}\text{C}$  NMR (151 MHz,  $\text{CDCl}_3$ )  $\delta$  178.68, 149.92, 136.06, 125.03, 123.92, 123.64, 120.57, 120.33, 36.01, 30.67, 29.41, 23.05, 22.87, 22.72.

$^{11}\text{B}$  NMR (193 MHz,  $\text{CDCl}_3$ )  $\delta$  -26.05 (t,  $J = 91.1$  Hz).

$^{11}\text{B}\{^1\text{H}\}$  NMR (193 MHz,  $\text{CDCl}_3$ )  $\delta$  -26.04.

$^1\text{H}\{^{11}\text{B}\}$  NMR (600 MHz,  $\text{CDCl}_3$ )  $\delta$  6.88 (d,  $J = 7.6$  Hz, 1H), 6.76 (s, 2H), 6.74 (d,  $J = 7.6$  Hz, 1H), 3.68 (s, 6H), 3.20 (dd,  $J = 15.1, 6.1$  Hz, 1H), 2.81 – 2.75 (m, 1H), 2.73 (s, 2H), 2.67 (d,  $J = 15.1$  Hz, 1H), 2.58 (d,  $J = 17.5$  Hz, 1H), 2.36 (dd,  $J = 12.1, 6.0$  Hz, 1H), 1.80 – 1.72 (m, 4H), 1.49 (d,  $J = 42.6$  Hz, 2H).

HRMS (ESI-TOF)  $m/z$ :  $[\text{M} + \text{Na}]^+$  cacl. for  $\text{C}_{18}\text{H}_{23}\text{BN}_2\text{NaO}_2$  333.1750; found: 333.1754.

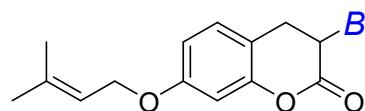

(1,3-dimethyl-1H-imidazol-3-ium-2-yl)(7-((3-methylbut-2-en-1-yl)oxy)-2-oxochroman-3-yl)dihydroborate (**5r**): White solid (630 mg, 93% yield).

$^1\text{H}$  NMR (600 MHz,  $\text{CDCl}_3$ )  $\delta$  7.03 (d,  $J = 8.2$  Hz, 1H), 6.78 (s, 2H), 6.59 (dd,  $J = 8.3, 2.5$  Hz, 1H), 6.51 (d,  $J = 2.4$  Hz, 1H), 5.48 (t,  $J = 6.7$  Hz, 1H), 4.47 (d,  $J = 6.7$  Hz, 2H), 3.69 (s, 6H), 3.17 (d,  $J = 13.7$  Hz, 1H), 2.66 (d,  $J = 14.9$  Hz, 1H), 2.36 (s, 1H), 1.79 (s, 3H), 1.74 (s, 3H), 1.68 – 1.26 (m, 2H).

$^{13}\text{C}$  NMR (151 MHz,  $\text{CDCl}_3$ )  $\delta$  178.28, 157.93, 152.95, 138.13, 128.70, 120.62, 119.70, 116.01, 109.62, 102.37, 64.94, 36.03, 29.89, 25.85, 18.22.

**<sup>11</sup>B NMR (193 MHz, CDCl<sub>3</sub>)** δ -26.01 (t, *J* = 90.7 Hz).

**<sup>11</sup>B{<sup>1</sup>H} NMR (193 MHz, CDCl<sub>3</sub>)** δ -26.00.

**<sup>1</sup>H{<sup>11</sup>B} NMR (600 MHz, CDCl<sub>3</sub>)** δ 7.03 (d, *J* = 8.2 Hz, 1H), 6.79 (s, 2H), 6.59 (dd, *J* = 8.2, 2.3 Hz, 1H), 6.51 (d, *J* = 2.2 Hz, 1H), 5.48 (t, *J* = 6.7 Hz, 1H), 4.47 (d, *J* = 6.7 Hz, 2H), 3.69 (s, 6H), 3.18 (dd, *J* = 14.9, 6.0 Hz, 1H), 2.66 (d, *J* = 14.9 Hz, 1H), 2.36 (dd, *J* = 12.1, 5.9 Hz, 1H), 1.79 (s, 3H), 1.74 (s, 3H), 1.50 (d, *J* = 29.4 Hz, 2H).

**HRMS (ESI-TOF) m/z:** [M + Na]<sup>+</sup> cacl. for C<sub>19</sub>H<sub>25</sub>BN<sub>2</sub>NaO<sub>3</sub> 363.1856; found: 363.1854.

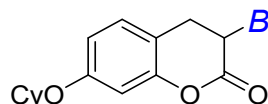

(7-(cyclohexyloxy)-2-oxochroman-3-yl)(1,3-dimethyl-1H-imidazol-3-ium-2-yl)dihydroborate (**5s**): White solid (453 mg, 64% yield).

**<sup>1</sup>H NMR (600 MHz, CDCl<sub>3</sub>)** δ 7.01 (d, *J* = 8.2 Hz, 1H), 6.78 (s, 2H), 6.57 (dd, *J* = 8.2, 2.4 Hz, 1H), 6.49 (d, *J* = 2.4 Hz, 1H), 4.16 (dt, *J* = 12.8, 6.3 Hz, 1H), 3.69 (s, 6H), 3.17 (d, *J* = 19.4 Hz, 1H), 2.66 (d, *J* = 14.9 Hz, 1H), 2.36 (d, *J* = 4.4 Hz, 1H), 1.98 (d, *J* = 10.3 Hz, 2H), 1.79 (dd, *J* = 8.2, 3.9 Hz, 2H), 1.58 (s, 2H), 1.49 (dd, *J* = 19.4, 12.9 Hz, 2H), 1.39 – 1.32 (m, 2H), 1.32 – 1.27 (m, 2H).

**<sup>13</sup>C NMR (151 MHz, CDCl<sub>3</sub>)** δ 178.30, 156.80, 152.96, 128.68, 120.61, 115.87, 111.11, 103.59, 75.74, 36.03, 31.89, 31.81, 29.91, 25.64, 23.85, 23.82.

**<sup>11</sup>B NMR (193 MHz, CDCl<sub>3</sub>)** δ -25.98 (t, *J* = 92.4 Hz).

**<sup>11</sup>B{<sup>1</sup>H} NMR (193 MHz, CDCl<sub>3</sub>)** δ -25.98.

**<sup>1</sup>H{<sup>11</sup>B} NMR (600 MHz, CDCl<sub>3</sub>)** δ 7.01 (d, *J* = 8.2 Hz, 1H), 6.78 (s, 2H), 6.57 (dd, *J* = 8.2, 2.3 Hz, 1H), 6.48 (d, *J* = 2.2 Hz, 1H), 4.16 (dt, *J* = 12.6, 6.1 Hz, 1H), 3.69 (s, 6H), 3.17 (dd, *J* = 14.9, 6.1 Hz, 1H), 2.66 (d, *J* = 15.0 Hz, 1H), 2.36 (dd, *J* = 12.3, 6.0 Hz, 1H), 1.98 (d, *J* = 10.1 Hz, 2H), 1.83 – 1.76 (m, 2H), 1.58 (d, *J* = 3.7 Hz, 2H), 1.51 – 1.48 (m, 2H), 1.39 – 1.33 (m, 2H), 1.33 – 1.26 (m, 2H).

**HRMS (ESI-TOF) m/z:** [M + Na]<sup>+</sup> cacl. for C<sub>20</sub>H<sub>27</sub>BN<sub>2</sub>NaO<sub>3</sub> 377.2012; found: 377.2013.

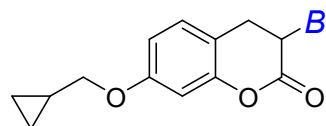

(7-(cyclopropylmethoxy)-2-oxochroman-3-yl)(1,3-dimethyl-1H-imidazol-3-ium-2-yl)dihydroborate (**5t**): White solid (581 mg, 89% yield).

**<sup>1</sup>H NMR (600 MHz, CDCl<sub>3</sub>)** δ 7.02 (d, *J* = 8.2 Hz, 1H), 6.79 (s, 2H), 6.58 (dd, *J* = 8.2, 1.9 Hz, 1H), 6.49 (d, *J* = 1.6 Hz, 1H), 3.76 (d, *J* = 6.9 Hz, 2H), 3.69 (s, 6H), 3.17 (d, *J* = 10.2 Hz, 1H), 2.66 (d, *J* = 14.9 Hz, 1H), 2.35 (s, 1H), 1.74 – 1.34 (m, 2H), 1.28 – 1.23 (m, 1H), 0.63 (q, *J* = 5.3 Hz, 2H), 0.34 (q, *J* = 5.0 Hz, 2H).

**<sup>13</sup>C NMR (151 MHz, CDCl<sub>3</sub>)** δ 178.28, 158.08, 152.96, 128.73, 120.62, 116.03, 109.52, 102.30, 72.95, 36.03, 29.88, 10.28, 3.19.

**<sup>11</sup>B NMR (193 MHz, CDCl<sub>3</sub>)** δ -26.02 (t, *J* = 89.1 Hz).

$^{11}\text{B}\{^1\text{H}\}$  NMR (193 MHz,  $\text{CDCl}_3$ )  $\delta$  -26.02.

$^1\text{H}\{^{11}\text{B}\}$  NMR (600 MHz,  $\text{CDCl}_3$ )  $\delta$  7.02 (d,  $J = 8.2$  Hz, 1H), 6.78 (s, 2H), 6.58 (d,  $J = 8.2$  Hz, 1H), 6.49 (s, 1H), 3.76 (d,  $J = 6.9$  Hz, 2H), 3.69 (s, 6H), 3.17 (dd,  $J = 14.9, 6.0$  Hz, 1H), 2.66 (d,  $J = 14.9$  Hz, 1H), 2.35 (d,  $J = 6.0$  Hz, 1H), 1.48 (d,  $J = 28.7$  Hz, 2H), 1.28 – 1.22 (m, 1H), 0.63 (d,  $J = 7.9$  Hz, 2H), 0.34 (d,  $J = 4.8$  Hz, 2H).

HRMS (ESI-TOF)  $m/z$ :  $[\text{M} + \text{Na}]^+$  cacl. for  $\text{C}_{18}\text{H}_{23}\text{BN}_2\text{NaO}_3$  349.1699; found: 349.1696.

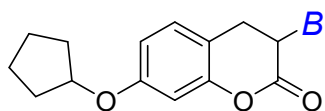

(7-(cyclopentyloxy)-2-oxochroman-3-yl)(1,3-dimethyl-1H-imidazol-3-ium-2-yl)dihydroborate (**5u**): White solid (585 mg, 86% yield).

$^1\text{H}$  NMR (600 MHz,  $\text{CDCl}_3$ )  $\delta$  7.01 (d,  $J = 8.2$  Hz, 1H), 6.78 (s, 2H), 6.54 (dd,  $J = 8.2, 2.4$  Hz, 1H), 6.46 (d,  $J = 2.2$  Hz, 1H), 4.72 – 4.68 (m, 1H), 3.69 (s, 6H), 3.17 (d,  $J = 11.6$  Hz, 1H), 2.65 (d,  $J = 14.9$  Hz, 1H), 2.36 (s, 1H), 1.90 – 1.77 (m, 6H), 1.63 – 1.58 (m, 2H), 1.56 – 1.16 (m, 2H).

$^{13}\text{C}$  NMR (151 MHz,  $\text{CDCl}_3$ )  $\delta$  178.34, 157.18, 152.91, 128.65, 120.61, 115.56, 110.62, 103.07, 79.42, 36.03, 32.86, 32.81, 29.87, 24.06.

$^{11}\text{B}$  NMR (193 MHz,  $\text{CDCl}_3$ )  $\delta$  -25.98 (t,  $J = 90.5$  Hz).

$^{11}\text{B}\{^1\text{H}\}$  NMR (193 MHz,  $\text{CDCl}_3$ )  $\delta$  -25.98.

$^1\text{H}\{^{11}\text{B}\}$  NMR (600 MHz,  $\text{CDCl}_3$ )  $\delta$  7.00 (d,  $J = 8.2$  Hz, 1H), 6.78 (s, 2H), 6.53 (d,  $J = 8.2$  Hz, 1H), 6.45 (s, 1H), 4.69 (s, 1H), 3.68 (s, 6H), 3.17 (dd,  $J = 14.8, 5.4$  Hz, 1H), 2.65 (d,  $J = 14.9$  Hz, 1H), 2.36 (d,  $J = 5.2$  Hz, 1H), 1.91 – 1.76 (m, 6H), 1.60 (s, 2H), 1.50 (d,  $J = 26.0$  Hz, 2H).

HRMS (ESI-TOF)  $m/z$ :  $[\text{M} + \text{Na}]^+$  cacl. for  $\text{C}_{19}\text{H}_{25}\text{BN}_2\text{NaO}_3$  363.1856; found: 363.1845.

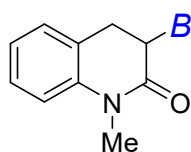

(1,3-dimethyl-1H-imidazol-3-ium-2-yl)(1-methyl-2-oxo-1,2,3,4-tetrahydroquinolin-3-yl)dihydroborate (**5v**): White solid (585 mg, 86% yield).

$^1\text{H}$  NMR (600 MHz,  $\text{CDCl}_3$ )  $\delta$  7.15 (t,  $J = 7.9$  Hz, 1H), 7.12 (d,  $J = 7.2$  Hz, 1H), 6.93 (t,  $J = 7.3$  Hz, 1H), 6.83 (d,  $J = 8.0$  Hz, 1H), 6.74 (s, 2H), 3.61 (s, 6H), 3.24 (s, 3H), 3.21 (s, 1H), 2.63 (d,  $J = 14.7$  Hz, 1H), 2.25 (s, 1H), 1.63 – 1.12 (m, 2H).

$^{13}\text{C}$  NMR (151 MHz,  $\text{CDCl}_3$ )  $\delta$  180.15, 141.19, 128.00, 126.09, 121.69, 120.27, 112.93, 35.82, 32.51, 29.10.

$^{11}\text{B}$  NMR (193 MHz,  $\text{CDCl}_3$ )  $\delta$  -26.83 (t,  $J = 89.2$  Hz).

$^{11}\text{B}\{^1\text{H}\}$  NMR (193 MHz,  $\text{CDCl}_3$ )  $\delta$  -26.82.

$^1\text{H}\{^{11}\text{B}\}$  NMR (600 MHz,  $\text{CDCl}_3$ )  $\delta$  7.17 – 7.13 (m, 1H), 7.12 (d,  $J = 6.4$  Hz, 1H), 6.92 (t,  $J = 7.2$  Hz, 1H), 6.83 (d,  $J = 8.0$  Hz, 1H), 6.74 (s, 2H), 3.61 (s, 6H), 3.24 (s, 3H), 3.21 (dd,  $J = 14.8, 5.7$  Hz, 1H), 2.63 (d,  $J = 14.8$  Hz, 1H), 2.25 (d,  $J = 5.6$  Hz, 1H), 1.36

(d,  $J = 45.1$  Hz, 2H).

Characterization agrees with previous reports for this compound.<sup>3</sup>

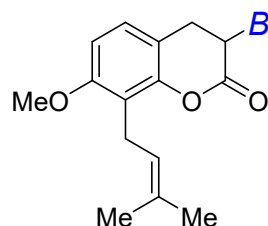

(1,3-dimethyl-1H-imidazol-3-ium-2-yl)(7-methoxy-8-(3-methylbut-2-en-1-yl)-2-oxochroman-3-yl)dihydroborate (**5w**): White solid (606 mg, 86% yield).

<sup>1</sup>H NMR (600 MHz, CDCl<sub>3</sub>)  $\delta$  6.93 (d,  $J = 8.2$  Hz, 1H), 6.77 (s, 2H), 6.55 (d,  $J = 8.2$  Hz, 1H), 5.18 (t,  $J = 6.4$  Hz, 1H), 3.80 (s, 3H), 3.67 (s, 6H), 3.41 (dd,  $J = 14.0, 7.4$  Hz, 1H), 3.32 (dd,  $J = 14.0, 6.5$  Hz, 1H), 3.18 (d,  $J = 9.9$  Hz, 1H), 2.67 (d,  $J = 14.8$  Hz, 1H), 2.32 (s, 1H), 1.77 (s, 3H), 1.63 (s, 3H), 1.60 – 1.07 (m, 2H).

<sup>13</sup>C NMR (151 MHz, CDCl<sub>3</sub>)  $\delta$  178.36, 156.31, 150.56, 131.03, 125.44, 122.93, 120.56, 116.99, 116.54, 105.44, 55.80, 35.95, 30.49, 25.81, 22.26, 17.91.

<sup>11</sup>B NMR (193 MHz, CDCl<sub>3</sub>)  $\delta$  -26.13 (t,  $J = 91.0$  Hz).

<sup>11</sup>B{<sup>1</sup>H} NMR (193 MHz, CDCl<sub>3</sub>)  $\delta$  -26.13.

<sup>1</sup>H{<sup>11</sup>B} NMR (600 MHz, CDCl<sub>3</sub>)  $\delta$  6.93 (d,  $J = 8.2$  Hz, 1H), 6.77 (s, 2H), 6.55 (d,  $J = 8.2$  Hz, 1H), 5.18 (t,  $J = 6.9$  Hz, 1H), 3.80 (s, 3H), 3.67 (s, 6H), 3.41 (dd,  $J = 14.0, 7.4$  Hz, 1H), 3.32 (dd,  $J = 14.0, 6.5$  Hz, 1H), 3.19 (dd,  $J = 14.7, 5.9$  Hz, 1H), 2.67 (d,  $J = 14.7$  Hz, 1H), 2.32 (dd,  $J = 11.7, 5.9$  Hz, 1H), 1.77 (s, 3H), 1.63 (s, 3H), 1.46 (d,  $J = 41.6$  Hz, 2H).

HRMS (ESI-TOF)  $m/z$ : [M + Na]<sup>+</sup> cacl. for C<sub>20</sub>H<sub>27</sub>BN<sub>2</sub>NaO<sub>3</sub> 377.2012; found: 377.2000.

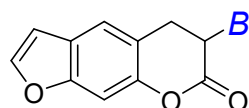

(1,3-dimethyl-1H-imidazol-3-ium-2-yl)(7-oxo-6,7-dihydro-5H-furo[3,2-g]chromen-6-yl)dihydroborate (**5x**): White solid (400 mg, 68% yield).

<sup>1</sup>H NMR (600 MHz, CDCl<sub>3</sub>)  $\delta$  7.54 (d,  $J = 2.2$  Hz, 1H), 7.34 (s, 1H), 7.09 (s, 1H), 6.78 (s, 2H), 6.68 (dd,  $J = 2.1, 0.8$  Hz, 1H), 3.68 (s, 6H), 3.34 (d,  $J = 12.0$  Hz, 1H), 2.84 (d,  $J = 14.8$  Hz, 1H), 2.39 (s, 1H), 1.56 – 1.12 (m, 2H).

<sup>13</sup>C NMR (151 MHz, CDCl<sub>3</sub>)  $\delta$  178.39, 153.75, 150.37, 144.74, 123.11, 120.63, 120.04, 119.61, 106.27, 98.70, 36.01, 30.87.

<sup>11</sup>B NMR (193 MHz, CDCl<sub>3</sub>)  $\delta$  -26.25 (t,  $J = 91.5$  Hz).

<sup>11</sup>B{<sup>1</sup>H} NMR (193 MHz, CDCl<sub>3</sub>)  $\delta$  -26.25.

<sup>1</sup>H{<sup>11</sup>B} NMR (600 MHz, CDCl<sub>3</sub>)  $\delta$  7.54 (d,  $J = 2.1$  Hz, 1H), 7.34 (s, 1H), 7.09 (s, 1H), 6.78 (s, 2H), 6.68 (d,  $J = 2.0$  Hz, 1H), 3.68 (s, 6H), 3.34 (dd,  $J = 14.7, 5.8$  Hz, 1H), 2.84 (d,  $J = 14.8$  Hz, 1H), 2.39 (dd,  $J = 12.9, 5.5$  Hz, 1H), 1.47 (d,  $J = 59.3$  Hz, 2H).

HRMS (ESI-TOF)  $m/z$ : [M + Na]<sup>+</sup> cacl. for C<sub>16</sub>H<sub>17</sub>BN<sub>2</sub>NaO<sub>3</sub> 319.1230; found: 319.1222.

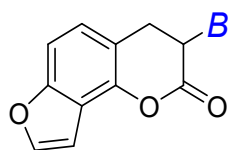

(1,3-dimethyl-1H-imidazol-3-ium-2-yl)(2-oxo-3,4-dihydro-2H-furo[2,3-h]chromen-3-yl)dihydroborate (**5y**): White solid (528 mg, 89% yield).

$^1\text{H NMR}$  (600 MHz,  $\text{CDCl}_3$ )  $\delta$  7.52 (d,  $J = 2.1$  Hz, 1H), 7.17 (d,  $J = 8.2$  Hz, 1H), 7.06 (d,  $J = 8.2$  Hz, 1H), 6.86 (d,  $J = 2.0$  Hz, 1H), 6.74 (s, 2H), 3.67 (s, 6H), 3.35 (d,  $J = 11.6$  Hz, 1H), 2.80 (d,  $J = 15.0$  Hz, 1H), 2.45 (s, 1H), 1.62 – 1.16 (m, 2H).

$^{13}\text{C NMR}$  (151 MHz,  $\text{CDCl}_3$ )  $\delta$  178.12, 154.97, 144.98, 144.40, 124.45, 120.62, 116.55, 116.46, 106.20, 103.34, 36.01, 30.35.

$^{11}\text{B NMR}$  (193 MHz,  $\text{CDCl}_3$ )  $\delta$  -25.90 (t,  $J = 91.4$  Hz).

$^{11}\text{B}\{^1\text{H}\}$  NMR (193 MHz,  $\text{CDCl}_3$ )  $\delta$  -25.90.

$^1\text{H}\{^{11}\text{B}\}$  NMR (600 MHz,  $\text{CDCl}_3$ )  $\delta$  7.52 (d,  $J = 2.0$  Hz, 1H), 7.16 (d,  $J = 8.2$  Hz, 1H), 7.06 (d,  $J = 8.2$  Hz, 1H), 6.86 (d,  $J = 1.3$  Hz, 1H), 6.73 (s, 2H), 3.67 (s, 6H), 3.35 (dd,  $J = 15.0, 6.2$  Hz, 1H), 2.80 (d,  $J = 15.0$  Hz, 1H), 2.46 (dd,  $J = 12.5, 6.0$  Hz, 1H), 1.52 (d,  $J = 45.8$  Hz, 2H).

HRMS (ESI-TOF)  $m/z$ :  $[\text{M} + \text{Na}]^+$  cacl. for  $\text{C}_{16}\text{H}_{17}\text{BN}_2\text{NaO}_3$  319.1230; found: 319.1221.

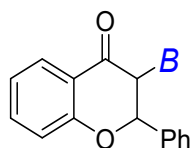

(1,3-dimethyl-1H-imidazol-3-ium-2-yl)(4-oxo-2-phenylchroman-3-yl)dihydroborate (**5z**): White solid (266 mg, 40% yield).

$^1\text{H NMR}$  (600 MHz,  $\text{CDCl}_3$ )  $\delta$  7.89 (dd,  $J = 7.8, 1.6$  Hz, 1H), 7.52 (d,  $J = 7.9$  Hz, 2H), 7.44 (ddd,  $J = 8.7, 7.2, 1.7$  Hz, 1H), 7.36 (t,  $J = 7.7$  Hz, 2H), 7.24 (d,  $J = 7.3$  Hz, 1H), 7.10 (d,  $J = 8.7$  Hz, 1H), 7.00 – 6.95 (m, 1H), 6.66 (s, 2H), 5.74 (s, 1H), 3.38 (s, 6H), 2.47 (s, 1H), 1.44 – 1.18 (m, 2H).

$^{13}\text{C NMR}$  (151 MHz,  $\text{CDCl}_3$ )  $\delta$  202.36, 161.35, 141.07, 134.36, 127.72, 126.81, 126.60, 125.57, 121.25, 120.42, 120.35, 117.60, 82.52, 35.70.

$^{11}\text{B NMR}$  (193 MHz,  $\text{CDCl}_3$ )  $\delta$  -30.05 (t,  $J = 91.1$  Hz).

$^{11}\text{B}\{^1\text{H}\}$  NMR (193 MHz,  $\text{CDCl}_3$ )  $\delta$  -30.05.

$^1\text{H}\{^{11}\text{B}\}$  NMR (600 MHz,  $\text{CDCl}_3$ )  $\delta$  7.89 (dd,  $J = 7.8, 1.6$  Hz, 1H), 7.52 (d,  $J = 7.7$  Hz, 2H), 7.44 (ddd,  $J = 8.7, 7.3, 1.7$  Hz, 1H), 7.36 (t,  $J = 7.7$  Hz, 2H), 7.24 (d,  $J = 7.4$  Hz, 1H), 7.10 (d,  $J = 8.3$  Hz, 1H), 6.98 (t,  $J = 7.8$  Hz, 1H), 6.66 (s, 2H), 5.74 (s, 1H), 3.38 (s, 6H), 2.47 (s, 1H), 1.35 (d,  $J = 37.4$  Hz, 2H).

HRMS (ESI-TOF)  $m/z$ :  $[\text{M} + \text{Na}]^+$  cacl. for  $\text{C}_{20}\text{H}_{21}\text{BN}_2\text{NaO}_2$  355.1594; found: 355.1588.

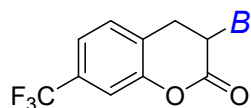

(1,3-dimethyl-1H-imidazol-3-ium-2-yl)(2-oxo-7-(trifluoromethyl)chroman-3-yl) dihydroborate (**5aa**): White solid (40 mg, 61% yield).

$^1\text{H NMR}$  (600 MHz,  $\text{CDCl}_3$ )  $\delta$  7.27 (d,  $J = 0.8$  Hz, 2H), 7.14 (s, 1H), 6.81 (s, 2H), 3.69 (s, 6H), 3.28 (d,  $J = 12.3$  Hz, 1H), 2.82 (d,  $J = 15.6$  Hz, 1H), 2.38 (s, 1H), 1.62 – 1.27 (m, 2H).

$^{13}\text{C NMR}$  (151 MHz,  $\text{CDCl}_3$ )  $\delta$  177.20, 152.44, 129.31 (q,  $J = 33.2$  Hz), 129.00, 128.38, 124.0 (q,  $J = 271.8$  Hz), 120.76, 120.06 (q,  $J = 3.5$  Hz), 112.55 (q,  $J = 4.0$  Hz), 36.01, 30.68.

$^{11}\text{B NMR}$  (193 MHz,  $\text{CDCl}_3$ )  $\delta$  26.10 (t,  $J = 92.6$  Hz).

$^{11}\text{B}\{^1\text{H}\}$  NMR (193 MHz,  $\text{CDCl}_3$ )  $\delta$  -26.10.

$^1\text{H NMR}$  (600 MHz,  $\text{CDCl}_3$ )  $\delta$  7.27 (d,  $J = 0.9$  Hz, 2H), 7.14 (s, 1H), 6.81 (s, 2H), 3.69 (s, 6H), 3.28 (dd,  $J = 15.6, 6.2$  Hz, 1H), 2.82 (d,  $J = 15.6$  Hz, 1H), 2.38 (dd,  $J = 13.6, 5.3$  Hz, 1H), 1.52 – 1.37 (m, 2H).

$^{19}\text{F NMR}$  (565 MHz,  $\text{CDCl}_3$ )  $\delta$  -62.30.

HRMS (ESI-TOF)  $m/z$ :  $[\text{M} + \text{Na}]^+$  calcd. for  $\text{C}_{15}\text{H}_{16}\text{BF}_3\text{N}_2\text{NaO}_2$  347.1155; found: 347.1151.

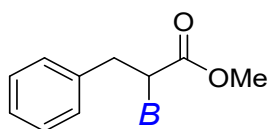

(1,3-dimethyl-1H-imidazol-3-ium-2-yl)(1-methoxy-1-oxo-3-phenylpropan-2-yl) dihydroborate (**6a**): Colorless liquid (41 mg, 75% yield); Gradient eluent: EtOAc/petroleum ether: 1/2 to 1/1.

$^1\text{H NMR}$  (600 MHz,  $\text{CDCl}_3$ )  $\delta$  7.20 – 7.17 (m, 4H), 7.08 (dt,  $J = 5.8, 3.5$  Hz, 1H), 6.80 (s, 2H), 3.72 (s, 6H), 3.37 (s, 3H), 3.10 (dd,  $J = 14.3, 10.2$  Hz, 1H), 2.71 (dd,  $J = 14.3, 4.1$  Hz, 1H), 2.19 (s, 1H), 1.70 (dd,  $J = 89.0, 71.9$  Hz, 2H).

$^{13}\text{C NMR}$  (151 MHz,  $\text{CDCl}_3$ )  $\delta$  181.96, 144.72, 128.46, 127.90, 125.05, 120.43, 50.38, 39.09, 35.99.

$^{11}\text{B NMR}$  (193 MHz,  $\text{CDCl}_3$ )  $\delta$  -24.79 (t,  $J = 89.9$  Hz).

$^{11}\text{B}\{^1\text{H}\}$  NMR (193 MHz,  $\text{CDCl}_3$ )  $\delta$  -25.02.

$^1\text{H}\{^{11}\text{B}\}$  NMR (600 MHz,  $\text{CDCl}_3$ )  $\delta$  7.19 (d,  $J = 4.7$  Hz, 4H), 7.10 – 7.06 (m, 1H), 6.79 (s, 2H), 3.72 (s, 6H), 3.37 (s, 3H), 3.11 (dd,  $J = 14.3, 10.2$  Hz, 1H), 2.71 (dd,  $J = 14.3, 4.4$  Hz, 1H), 2.19 (td,  $J = 10.4, 5.1$  Hz, 1H), 1.62 (d,  $J = 17.5$  Hz, 2H).

Characterization agrees with previous reports for this compound.<sup>4</sup>

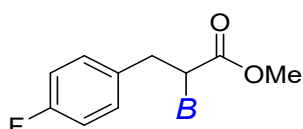

(1,3-dimethyl-1H-imidazol-3-ium-2-yl)(3-(4-fluorophenyl)-1-methoxy-1-oxopropan-2-yl) dihydroborate (**6b**): Colorless liquid (48 mg, 83% yield); Gradient eluent: EtOAc/petroleum ether: 1/3 to 1/2.

$^1\text{H NMR}$  (600 MHz,  $\text{CDCl}_3$ )  $\delta$  7.13 (dd,  $J = 8.6, 5.7$  Hz, 2H), 6.88 – 6.83 (m, 2H),

6.81 (s, 2H), 3.71 (s, 6H), 3.34 (s, 3H), 3.04 (dd,  $J = 14.3, 10.3$  Hz, 1H), 2.66 (dd,  $J = 14.3, 4.1$  Hz, 1H), 2.13 (s, 1H), 1.60 (dd,  $J = 172.9, 90.9$  Hz, 2H).

$^{13}\text{C}$  NMR (151 MHz,  $\text{CDCl}_3$ )  $\delta$  181.78, 160.86 (d,  $J = 241.6$  Hz), 140.36, 129.74 (d,  $J = 7.6$  Hz), 120.46, 114.47 (d,  $J = 21.1$  Hz) 50.36, 38.28, 35.97.

$^{11}\text{B}$  NMR (193 MHz,  $\text{CDCl}_3$ )  $\delta$  -24.87 (t,  $J = 90.3$  Hz).

$^{11}\text{B}\{^1\text{H}\}$  NMR (193 MHz,  $\text{CDCl}_3$ )  $\delta$  -25.10.

$^1\text{H}\{^{11}\text{B}\}$  NMR (600 MHz,  $\text{CDCl}_3$ )  $\delta$  7.13 (dd,  $J = 8.3, 5.8$  Hz, 2H), 6.86 (t,  $J = 8.8$  Hz, 2H), 6.80 (s, 2H), 3.71 (s, 6H), 3.34 (s, 3H), 3.04 (dd,  $J = 14.3, 10.3$  Hz, 1H), 2.66 (dd,  $J = 14.4, 4.3$  Hz, 1H), 2.13 (td,  $J = 10.5, 5.1$  Hz, 1H), 1.60 (d,  $J = 20.2$  Hz, 2H).

$^{19}\text{F}$  NMR (565 MHz,  $\text{CDCl}_3$ )  $\delta$  -119.14.

HRMS (ESI-TOF)  $m/z$ :  $[\text{M} + \text{Na}]^+$  cacl. for  $\text{C}_{15}\text{H}_{20}\text{BFN}_2\text{NaO}_2$  313.1500; found: 313.1497.

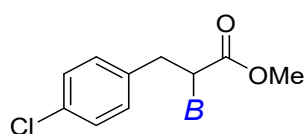

(3-(4-chlorophenyl)-1-methoxy-1-oxopropan-2-yl)(1,3-dimethyl-1H-imidazol-3-ium-2-yl)dihydroborate (**6c**): Colorless liquid (40 mg, 65% yield); Gradient eluent: EtOAc/petroleum ether: 1/3 to 1/2.

$^1\text{H}$  NMR (600 MHz,  $\text{CDCl}_3$ )  $\delta$  7.16 – 7.10 (m, 4H), 6.81 (s, 2H), 3.71 (s, 6H), 3.34 (s, 3H), 3.04 (dd,  $J = 14.3, 10.3$  Hz, 1H), 2.66 (dd,  $J = 14.4, 4.2$  Hz, 1H), 2.13 (s, 1H), 1.60 (dd,  $J = 167.4, 80.3$  Hz, 2H).

$^{13}\text{C}$  NMR (151 MHz,  $\text{CDCl}_3$ )  $\delta$  181.67, 143.24, 130.61, 129.88, 127.92, 120.46, 50.39, 38.45, 35.99.

$^{11}\text{B}$  NMR (193 MHz,  $\text{CDCl}_3$ )  $\delta$  -24.86 (t,  $J = 90.3$  Hz).

$^{11}\text{B}\{^1\text{H}\}$  NMR (193 MHz,  $\text{CDCl}_3$ )  $\delta$  -25.09.

$^1\text{H}\{^{11}\text{B}\}$  NMR (600 MHz,  $\text{CDCl}_3$ )  $\delta$  7.13 (q,  $J = 8.4$  Hz, 4H), 6.81 (s, 2H), 3.71 (s, 6H), 3.34 (s, 3H), 3.04 (dd,  $J = 14.3, 10.3$  Hz, 1H), 2.66 (dd,  $J = 14.4, 4.3$  Hz, 1H), 2.13 (td,  $J = 10.6, 5.0$  Hz, 1H), 1.59 (d,  $J = 20.9$  Hz, 2H).

HRMS (ESI-TOF)  $m/z$ :  $[\text{M} + \text{Na}]^+$  cacl. for  $\text{C}_{15}\text{H}_{20}\text{BClN}_2\text{NaO}_2$  329.1204; found: 329.1194.

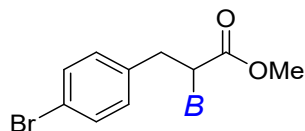

(3-(4-bromophenyl)-1-methoxy-1-oxopropan-2-yl)(1,3-dimethyl-1H-imidazol-3-ium-2-yl)dihydroborate (**6d**): Colorless liquid (45 mg, 64% yield); Gradient eluent: EtOAc/petroleum ether: 1/3 to 1/2.

$^1\text{H}$  NMR (600 MHz,  $\text{CDCl}_3$ )  $\delta$  7.31 – 7.28 (m, 2H), 7.06 (d,  $J = 8.3$  Hz, 2H), 6.81 (s, 2H), 3.71 (s, 6H), 3.34 (s, 3H), 3.03 (dd,  $J = 14.3, 10.3$  Hz, 1H), 2.65 (dd,  $J = 14.3, 4.2$  Hz, 1H), 2.12 (s, 1H), 1.74 (dd,  $J = 161.4, 83.9$  Hz, 2H).

$^{13}\text{C}$  NMR (151 MHz,  $\text{CDCl}_3$ )  $\delta$  181.65, 143.76, 130.86, 130.34, 120.46, 118.71, 50.40, 38.50, 36.00.

**<sup>11</sup>B NMR (193 MHz, CDCl<sub>3</sub>)** δ -25.09 (t, *J* = 90.2 Hz).

**<sup>11</sup>B{<sup>1</sup>H} NMR (193 MHz, CDCl<sub>3</sub>)** δ -25.09.

**<sup>1</sup>H{<sup>11</sup>B} NMR (600 MHz, CDCl<sub>3</sub>)** δ 7.29 (d, *J* = 8.2 Hz, 2H), 7.06 (d, *J* = 8.2 Hz, 2H), 6.81 (s, 2H), 3.72 (s, 6H), 3.34 (s, 3H), 3.03 (dd, *J* = 14.3, 10.3 Hz, 1H), 2.65 (dd, *J* = 14.4, 4.3 Hz, 1H), 2.13 (td, *J* = 10.5, 5.1 Hz, 1H), 1.59 (d, *J* = 22.5 Hz, 2H).

**HRMS (ESI-TOF)** *m/z*: [M + Na]<sup>+</sup> cacl. for C<sub>15</sub>H<sub>20</sub>BBrN<sub>2</sub>NaO<sub>2</sub> 373.0699; found: 373.0693.

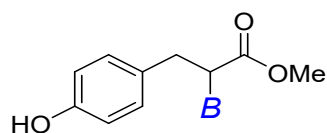

(1,3-dimethyl-1H-imidazol-3-ium-2-yl)(3-(4-hydroxyphenyl)-1-methoxy-1-oxopropan-2-yl)dihydroborate (**6e**): White solid (45 mg, 64% yield); Gradient eluent: EtOAc/petroleum ether: 1/3 to 1/2.

**<sup>1</sup>H NMR (600 MHz, CDCl<sub>3</sub>)** δ 6.96 (d, *J* = 8.4 Hz, 2H), 6.75 (s, 2H), 6.58 (d, *J* = 8.5 Hz, 2H), 3.69 (s, 6H), 3.41 (s, 3H), 2.98 (dd, *J* = 14.5, 10.7 Hz, 1H), 2.62 (dd, *J* = 14.5, 4.0 Hz, 1H), 2.19 (d, *J* = 4.8 Hz, 1H), 1.62 (dd, *J* = 179.8, 79.5 Hz, 2H).

**<sup>13</sup>C NMR (151 MHz, CDCl<sub>3</sub>)** δ 183.23, 153.85, 135.92, 129.20, 120.51, 114.91, 50.73, 38.10, 35.94.

**<sup>11</sup>B NMR (193 MHz, CDCl<sub>3</sub>)** δ -24.99 (t, *J* = 90.3 Hz).

**<sup>11</sup>B{<sup>1</sup>H} NMR (193 MHz, CDCl<sub>3</sub>)** δ -24.99.

**<sup>1</sup>H{<sup>11</sup>B} NMR (600 MHz, CDCl<sub>3</sub>)** δ 6.96 (d, *J* = 8.1 Hz, 2H), 6.75 (s, 2H), 6.58 (d, *J* = 8.1 Hz, 2H), 3.69 (s, 6H), 3.41 (s, 3H), 2.99 (dd, *J* = 14.4, 10.7 Hz, 1H), 2.62 (dd, *J* = 14.5, 4.0 Hz, 1H), 2.19 (td, *J* = 10.3, 5.1 Hz, 1H), 1.61 (d, *J* = 23.7 Hz, 2H).

**HRMS (ESI-TOF)** *m/z*: [M + Na]<sup>+</sup> cacl. for C<sub>15</sub>H<sub>21</sub>BN<sub>2</sub>NaO<sub>3</sub> 311.1543; found: 311.1531.

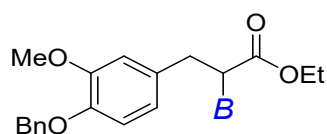

(3-(4-(benzyloxy)-3-methoxyphenyl)-1-ethoxy-1-oxopropan-2-yl)(1,3-dimethyl-1H-imidazol-3-ium-2-yl)dihydroborate (**6f**): Colorless liquid (60 mg, 71% yield); Gradient eluent: EtOAc/petroleum ether: 1/3 to 1/2.

**<sup>1</sup>H NMR (600 MHz, CDCl<sub>3</sub>)** δ 7.41 (d, *J* = 7.5 Hz, 2H), 7.33 (t, *J* = 7.5 Hz, 2H), 7.26 (t, *J* = 7.3 Hz, 1H), 6.80 (d, *J* = 1.9 Hz, 1H), 6.77 (s, 2H), 6.73 (d, *J* = 8.2 Hz, 1H), 6.66 (dd, *J* = 8.2, 1.9 Hz, 1H), 5.08 (s, 2H), 3.83 (s, 3H), 3.83 – 3.74 (m, 2H), 3.70 (s, 6H), 3.05 (dd, *J* = 14.4, 10.2 Hz, 1H), 2.65 (dd, *J* = 14.4, 4.2 Hz, 1H), 2.15 (s, 1H), 1.62 (dd, *J* = 180.0, 91.1 Hz, 2H), 0.97 (t, *J* = 7.1 Hz, 3H).

**<sup>13</sup>C NMR (151 MHz, CDCl<sub>3</sub>)** δ 181.73, 149.14, 145.72, 138.51, 137.70, 128.44, 127.64, 127.33, 120.39, 120.24, 114.10, 112.64, 71.24, 58.56, 55.87, 38.79, 36.01, 14.40.

**<sup>11</sup>B NMR (193 MHz, CDCl<sub>3</sub>)** δ -24.99 (t, *J* = 89.7 Hz).



$^{11}\text{B}\{^1\text{H}\}$  NMR (193 MHz,  $\text{CDCl}_3$ )  $\delta$  -25.03.

$^1\text{H}\{^{11}\text{B}\}$  NMR (600 MHz,  $\text{CDCl}_3$ )  $\delta$  7.41 (d,  $J = 7.6$  Hz, 2H), 7.33 (t,  $J = 7.5$  Hz, 2H), 7.26 (t,  $J = 7.3$  Hz, 1H), 6.80 (s, 1H), 6.77 (s, 2H), 6.73 (d,  $J = 8.1$  Hz, 1H), 6.66 (d,  $J = 8.2$  Hz, 1H), 5.08 (s, 2H), 3.83 (s, 3H), 3.78 (td,  $J = 18.1, 7.2$  Hz, 2H), 3.70 (s, 6H), 3.05 (dd,  $J = 14.3, 10.3$  Hz, 1H), 2.65 (dd,  $J = 14.4, 4.1$  Hz, 1H), 2.15 (td,  $J = 10.2, 5.2$  Hz, 1H), 1.61 (d,  $J = 21.3$  Hz, 2H), 0.97 (t,  $J = 7.1$  Hz, 3H).

Characterization agrees with previous reports for this compound.<sup>4</sup>

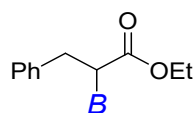

(1,3-dimethyl-1H-imidazol-3-ium-2-yl)(1-ethoxy-1-oxo-3-phenylpropan-2-yl) dihydroborate (**6g**): Colorless liquid (43 mg, 75% yield); Gradient eluent: EtOAc/petroleum ether: 1/3 to 1/2.

$^1\text{H}$  NMR (600 MHz,  $\text{CDCl}_3$ )  $\delta$  7.22 – 7.17 (m, 4H), 7.10 – 7.06 (m, 1H), 6.80 (s, 2H), 3.81 (tdd,  $J = 10.8, 7.1, 3.7$  Hz, 2H), 3.73 (s, 6H), 3.11 (dd,  $J = 14.3, 10.2$  Hz, 1H), 2.72 (dd,  $J = 14.3, 4.0$  Hz, 1H), 2.19 (s, 1H), 1.70 – 1.35 (m, 2H), 0.98 (t,  $J = 7.1$  Hz, 3H).

$^{13}\text{C}$  NMR (151 MHz,  $\text{CDCl}_3$ )  $\delta$  181.62, 144.87, 128.55, 127.84, 124.98, 120.35, 58.54, 39.14, 36.04, 14.33.

$^{11}\text{B}$  NMR (193 MHz,  $\text{CDCl}_3$ )  $\delta$  -24.77 (t,  $J = 89.7$  Hz).

$^{11}\text{B}\{^1\text{H}\}$  NMR (193 MHz,  $\text{CDCl}_3$ )  $\delta$  -25.00.

$^1\text{H}\{^{11}\text{B}\}$  NMR (600 MHz,  $\text{CDCl}_3$ )  $\delta$  7.22 – 7.17 (m, 4H), 7.08 (t,  $J = 6.5$  Hz, 1H), 6.80 (s, 2H), 3.81 (ddd,  $J = 26.2, 10.8, 7.1$  Hz, 2H), 3.73 (s, 6H), 3.12 (dd,  $J = 14.3, 10.2$  Hz, 1H), 2.72 (dd,  $J = 14.3, 4.3$  Hz, 1H), 2.19 (td,  $J = 10.4, 5.2$  Hz, 1H), 1.64 (s, 2H), 0.98 (t,  $J = 7.1$  Hz, 3H).

Characterization agrees with previous reports for this compound.<sup>4</sup>

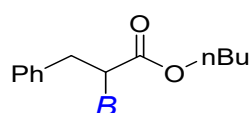

(1-butoxy-1-oxo-3-phenylpropan-2-yl)(1,3-dimethyl-1H-imidazol-3-ium-2-yl) dihydroborate (**6h**): Colorless liquid (48 mg, 76% yield); Gradient eluent: EtOAc/petroleum ether: 1/3 to 1/2.

$^1\text{H}$  NMR (600 MHz,  $\text{CDCl}_3$ )  $\delta$  7.21 – 7.16 (m, 4H), 7.07 (dd,  $J = 7.4, 5.1$  Hz, 1H), 6.79 (s, 2H), 3.84 – 3.79 (m, 1H), 3.72 (s, 6H), 3.71 – 3.67 (m, 1H), 3.11 (dd,  $J = 14.3, 10.3$  Hz, 1H), 2.71 (dd,  $J = 14.4, 4.1$  Hz, 1H), 2.19 (td,  $J = 10.3, 5.4$  Hz, 1H), 1.63 (s, 2H), 1.33 (dd,  $J = 14.9, 7.0$  Hz, 2H), 1.21 – 1.14 (m, 2H), 0.82 (t,  $J = 7.4$  Hz, 3H).

$^{13}\text{C}$  NMR (151 MHz,  $\text{CDCl}_3$ )  $\delta$  181.75, 144.83, 128.49, 127.83, 124.98, 120.38, 62.67, 39.16, 36.01, 30.93, 19.14, 13.79.

$^{11}\text{B}$  NMR (193 MHz,  $\text{CDCl}_3$ )  $\delta$  -24.98 (t,  $J = 90.0$  Hz).

$^{11}\text{B}\{^1\text{H}\}$  NMR (193 MHz,  $\text{CDCl}_3$ )  $\delta$  -24.98.

$^1\text{H}\{^{11}\text{B}\}$  NMR (600 MHz,  $\text{CDCl}_3$ )  $\delta$  7.21 – 7.16 (m, 4H), 7.07 (dd,  $J = 7.4, 5.1$  Hz, 1H), 6.79 (s, 2H), 3.84 – 3.79 (m, 1H), 3.72 (s, 6H), 3.71 – 3.67 (m, 1H), 3.11 (dd,  $J =$

14.3, 10.3 Hz, 1H), 2.71 (dd,  $J = 14.4, 4.1$  Hz, 1H), 2.19 (td,  $J = 10.3, 5.4$  Hz, 1H), 1.63 (s, 2H), 1.33 (dd,  $J = 14.9, 7.0$  Hz, 2H), 1.21 – 1.14 (m, 2H), 0.82 (t,  $J = 7.4$  Hz, 3H). Characterization agrees with previous reports for this compound.<sup>4</sup>

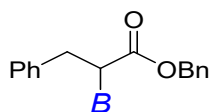

(1-(benzyloxy)-1-oxo-3-phenylpropan-2-yl)(1,3-dimethyl-1H-imidazol-3-ium-2-yl)dihydroborate (**6i**): Colorless liquid (60 mg, 71% yield); Gradient eluent: EtOAc/petroleum ether: 1/3 to 1/2.

**<sup>1</sup>H NMR (600 MHz, CDCl<sub>3</sub>)**  $\delta$  7.25 – 7.22 (m, 3H), 7.21 – 7.16 (m, 4H), 7.13 – 7.07 (m, 3H), 6.65 (s, 2H), 4.84 (q,  $J = 12.6$  Hz, 2H), 3.61 (s, 6H), 3.15 (dd,  $J = 14.3, 10.3$  Hz, 1H), 2.76 (dd,  $J = 14.4, 4.3$  Hz, 1H), 2.28 (td,  $J = 10.4, 5.2$  Hz, 1H), 1.64 (s, 2H). **<sup>13</sup>C NMR (151 MHz, CDCl<sub>3</sub>)**  $\delta$  181.36, 144.73, 137.31, 128.57, 128.21, 127.92, 127.47, 125.08, 120.32, 64.56, 39.24, 35.94.

**<sup>11</sup>B NMR (193 MHz, CDCl<sub>3</sub>)**  $\delta$  -24.97 (t,  $J = 89.9$  Hz).

**<sup>11</sup>B{<sup>1</sup>H} NMR (193 MHz, CDCl<sub>3</sub>)**  $\delta$  -24.97.

**<sup>1</sup>H{<sup>11</sup>B} NMR (600 MHz, CDCl<sub>3</sub>)**  $\delta$  7.25 – 7.22 (m, 3H), 7.21 – 7.16 (m, 4H), 7.13 – 7.07 (m, 3H), 6.65 (s, 2H), 4.84 (q,  $J = 12.6$  Hz, 2H), 3.61 (s, 6H), 3.15 (dd,  $J = 14.3, 10.3$  Hz, 1H), 2.76 (dd,  $J = 14.4, 4.3$  Hz, 1H), 2.28 (td,  $J = 10.4, 5.2$  Hz, 1H), 1.64 (s, 2H).

Characterization agrees with previous reports for this compound.<sup>4</sup>

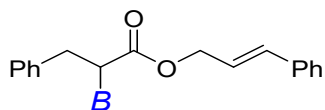

(1-(cinnamyloxy)-1-oxo-3-phenylpropan-2-yl)(1,3-dimethyl-1H-imidazol-3-ium-2-yl)dihydroborate (**6j**): Colorless liquid (58 mg, 78% yield); Gradient eluent: EtOAc/petroleum ether: 1/3 to 1/2.

**<sup>1</sup>H NMR (600 MHz, CDCl<sub>3</sub>)**  $\delta$  7.28 – 7.25 (m, 4H), 7.20 (dd,  $J = 6.5, 3.9$  Hz, 3H), 7.16 (t,  $J = 7.6$  Hz, 2H), 7.05 (t,  $J = 7.2$  Hz, 1H), 6.66 (s, 2H), 6.38 (d,  $J = 15.9$  Hz, 1H), 5.97 (dt,  $J = 15.9, 6.2$  Hz, 1H), 4.41 (dddd,  $J = 37.5, 13.2, 6.2, 1.3$  Hz, 2H), 3.65 (s, 6H), 3.13 (dd,  $J = 14.3, 10.3$  Hz, 1H), 2.73 (dd,  $J = 14.3, 4.1$  Hz, 1H), 2.24 (s, 1H), 1.50 (dd,  $J = 169.5, 83.7$  Hz, 2H).

**<sup>13</sup>C NMR (151 MHz, CDCl<sub>3</sub>)**  $\delta$  181.31, 144.78, 136.62, 132.55, 128.59, 127.94, 127.80, 126.46, 125.11, 124.73, 120.41, 63.32, 39.23, 36.05.

**<sup>11</sup>B NMR (193 MHz, CDCl<sub>3</sub>)**  $\delta$  -24.89 (t,  $J = 90.0$  Hz).

**<sup>11</sup>B{<sup>1</sup>H} NMR (193 MHz, CDCl<sub>3</sub>)**  $\delta$  -24.89.

**<sup>1</sup>H{<sup>11</sup>B} NMR (600 MHz, CDCl<sub>3</sub>)**  $\delta$  7.31 – 7.27 (m, 4H), 7.22 (d,  $J = 7.2$  Hz, 3H), 7.18 (t,  $J = 7.5$  Hz, 2H), 7.08 (t,  $J = 7.2$  Hz, 1H), 6.68 (s, 2H), 6.41 (d,  $J = 15.9$  Hz, 1H), 6.03 – 5.96 (m, 1H), 4.43 (ddd,  $J = 35.1, 13.2, 6.2$  Hz, 2H), 3.68 (s, 6H), 3.15 (dd,  $J = 14.2, 10.4$  Hz, 1H), 2.75 (dd,  $J = 14.3, 3.9$  Hz, 1H), 2.30 – 2.23 (m, 1H), 1.66 (s, 2H).

Characterization agrees with previous reports for this compound.<sup>4</sup>

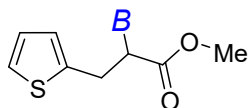

(1,3-dimethyl-1H-imidazol-3-ium-2-yl)(1-methoxy-1-oxo-3-(thiophen-2-yl)propan-2-yl)dihydroborate (**6k**): Colorless liquid (26 mg, 46% yield); Gradient eluent: EtOAc/petroleum ether: 1/2 to 1/1.

$^1\text{H NMR}$  (600 MHz,  $\text{CDCl}_3$ )  $\delta$  7.00 (s, 1H), 6.83 (d,  $J = 2.8$  Hz, 1H), 6.82 (s, 2H), 6.75 (s, 1H), 3.74 (s, 6H), 3.42 (s, 3H), 3.31 (t,  $J = 12.6$  Hz, 1H), 2.89 (d,  $J = 15.3$  Hz, 1H), 2.20 (s, 1H), 1.76 – 1.36 (m, 2H).

$^{13}\text{C NMR}$  (151 MHz,  $\text{CDCl}_3$ )  $\delta$  181.59, 148.14, 126.37, 123.58, 122.25, 120.46, 50.51, 36.02, 33.32.

$^{11}\text{B NMR}$  (193 MHz,  $\text{CDCl}_3$ )  $\delta$  -25.17 (t,  $J = 89.8$  Hz).

$^{11}\text{B}\{^1\text{H}\}$  NMR (193 MHz,  $\text{CDCl}_3$ )  $\delta$  -25.17.

$^1\text{H}\{^{11}\text{B}\}$  NMR (600 MHz,  $\text{CDCl}_3$ )  $\delta$  7.00 (s, 1H), 6.83 (d,  $J = 2.5$  Hz, 1H), 6.81 (s, 2H), 6.75 (s, 1H), 3.74 (s, 6H), 3.42 (s, 3H), 3.31 (t,  $J = 12.7$  Hz, 1H), 2.90 (d,  $J = 15.3$  Hz, 1H), 2.20 (s, 1H), 1.61 (d,  $J = 33.7$  Hz, 2H).

Characterization agrees with previous reports for this compound.<sup>4</sup>

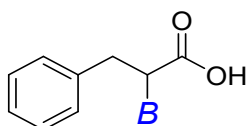

(1-carboxy-2-phenylethyl)(1,3-dimethyl-1H-imidazol-3-ium-2-yl)dihydroborate (**7a**): White solid (27 mg, 52% yield); Gradient eluent: EtOAc/petroleum ether: 1/2 to 2/1.

$^1\text{H NMR}$  (600 MHz,  $\text{CDCl}_3$ )  $\delta$  7.22 (s, 4H), 7.11 (s, 1H), 6.68 (s, 2H), 3.63 (s, 6H), 3.05 (t,  $J = 12.4$  Hz, 1H), 2.73 (d,  $J = 14.5$  Hz, 1H), 2.17 (s, 1H), 1.91 – 1.40 (m, 2H).

$^{13}\text{C NMR}$  (151 MHz,  $\text{CDCl}_3$ )  $\delta$  188.54, 144.74, 128.59, 127.87, 125.07, 120.50, 38.65, 35.85.

$^{11}\text{B NMR}$  (193 MHz,  $\text{CDCl}_3$ )  $\delta$  -24.59 (t,  $J = 90.5$  Hz).

$^{11}\text{B}\{^1\text{H}\}$  NMR (193 MHz,  $\text{CDCl}_3$ )  $\delta$  -24.60.

$^1\text{H}\{^{11}\text{B}\}$  NMR (600 MHz,  $\text{CDCl}_3$ )  $\delta$  7.22 (s, 4H), 7.11 (s, 1H), 6.68 (s, 2H), 3.62 (s, 6H), 3.05 (t,  $J = 11.8$  Hz, 1H), 2.73 (d,  $J = 14.5$  Hz, 1H), 2.17 (s, 1H), 1.65 (d,  $J = 38.3$  Hz, 2H).

Characterization agrees with previous reports for this compound.<sup>3</sup>

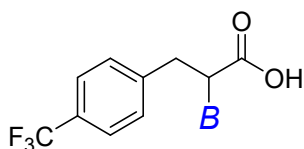

(1-carboxy-2-(4-(trifluoromethyl)phenyl)ethyl)(1,3-dimethyl-1H-imidazol-3-ium-2-yl)dihydroborate (**7b**): White solid (35 mg, 58% yield); Gradient eluent: EtOAc/petroleum ether: 1/2 to 2/1.

$^1\text{H NMR}$  (600 MHz,  $\text{CDCl}_3$ )  $\delta$  7.46 (d,  $J = 8.0$  Hz, 2H), 7.32 (d,  $J = 8.0$  Hz, 2H), 6.71 (s, 2H), 3.62 (s, 6H), 3.07 (dd,  $J = 14.4, 10.6$  Hz, 1H), 2.77 (dd,  $J = 14.5, 3.7$  Hz, 1H),

2.14 (s, 1H), 1.61 (dd,  $J = 152.6, 78.3$  Hz, 2H).

$^{13}\text{C}$  NMR (151 MHz,  $\text{CDCl}_3$ )  $\delta$  188.33, 148.92, 128.92, 126.4 (q,  $J = 252.7$  Hz), 127.32 (q,  $J = 33.2$  Hz), 124.66 (q,  $J = 3.0$  Hz), 120.53, 38.50, 35.79.

$^{11}\text{B}$  NMR (193 MHz,  $\text{CDCl}_3$ )  $\delta$  -24.64 (t,  $J = 91.6$  Hz).

$^{11}\text{B}\{^1\text{H}\}$  NMR (193 MHz,  $\text{CDCl}_3$ )  $\delta$  -24.63.

$^1\text{H}\{^{11}\text{B}\}$  NMR (600 MHz,  $\text{CDCl}_3$ )  $\delta$  7.46 (d,  $J = 8.0$  Hz, 2H), 7.32 (d,  $J = 7.9$  Hz, 2H), 6.71 (s, 2H), 3.62 (s, 6H), 3.07 (dd,  $J = 14.4, 10.7$  Hz, 1H), 2.77 (dd,  $J = 14.5, 3.7$  Hz, 1H), 2.14 (d,  $J = 4.6$  Hz, 1H), 1.63 (d,  $J = 39.0$  Hz, 2H).  $^{19}\text{F}$  NMR (565 MHz,  $\text{CDCl}_3$ )  $\delta$  -62.03.

HRMS (ESI-TOF)  $m/z$ :  $[\text{M} + \text{Na}]^+$  cacl. for  $\text{C}_{15}\text{H}_{18}\text{BF}_3\text{N}_2\text{NaO}_2$  349.1311; found: 349.1306.

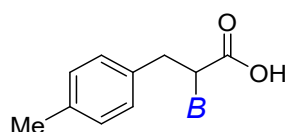

(1-carboxy-2-(p-tolyl)ethyl)(1,3-dimethyl-1H-imidazol-3-ium-2-yl)dihydroborate (**7c**): White solid (38 mg, 70% yield); Gradient eluent: EtOAc/petroleum ether: 1/2 to 2/1.

$^1\text{H}$  NMR (600 MHz,  $\text{CDCl}_3$ )  $\delta$  7.12 (d,  $J = 7.9$  Hz, 2H), 7.03 (d,  $J = 7.9$  Hz, 2H), 6.69 (s, 2H), 3.63 (s, 6H), 3.02 (dd,  $J = 14.5, 10.5$  Hz, 1H), 2.68 (dd,  $J = 14.6, 3.8$  Hz, 1H), 2.29 (s, 3H), 2.16 (s, 1H), 1.63 (dd,  $J = 192.3, 73.8$  Hz, 2H).

$^{13}\text{C}$  NMR (151 MHz,  $\text{CDCl}_3$ )  $\delta$  188.69, 141.66, 134.28, 128.56, 128.44, 120.49, 38.20, 35.85, 21.01.

$^{11}\text{B}$  NMR (193 MHz,  $\text{CDCl}_3$ )  $\delta$  -24.58 (t,  $J = 88.9$  Hz).

$^{11}\text{B}\{^1\text{H}\}$  NMR (193 MHz,  $\text{CDCl}_3$ )  $\delta$  -24.58.

$^1\text{H}\{^{11}\text{B}\}$  NMR (600 MHz,  $\text{CDCl}_3$ )  $\delta$  7.12 (d,  $J = 7.8$  Hz, 2H), 7.03 (d,  $J = 7.8$  Hz, 2H), 6.69 (s, 2H), 3.63 (s, 6H), 3.02 (dd,  $J = 14.5, 10.5$  Hz, 1H), 2.68 (dd,  $J = 14.6, 3.8$  Hz, 1H), 2.29 (s, 3H), 2.15 (d,  $J = 4.8$  Hz, 1H), 1.65 (d,  $J = 38.5$  Hz, 2H).

HRMS (ESI-TOF)  $m/z$ :  $[\text{M} + \text{Na}]^+$  cacl. for  $\text{C}_{15}\text{H}_{21}\text{BN}_2\text{NaO}_2$  295.1594; found: 295.1587.

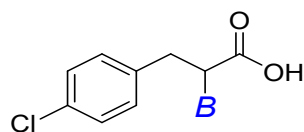

(1-carboxy-2-(4-chlorophenyl)ethyl)(1,3-dimethyl-1H-imidazol-3-ium-2-yl)dihydroborate (**7d**): White solid (38 mg, 65% yield); Gradient eluent: EtOAc/petroleum ether: 1/2 to 2/1.

$^1\text{H}$  NMR (600 MHz,  $\text{CDCl}_3$ )  $\delta$  7.19 – 7.13 (m, 4H), 6.75 (s, 2H), 3.65 (s, 6H), 2.99 (dd,  $J = 14.5, 10.5$  Hz, 1H), 2.69 (dd,  $J = 14.5, 4.2$  Hz, 1H), 2.11 (s, 1H), 1.62 (dd,  $J = 83.4, 39.0$  Hz, 2H).

$^{13}\text{C}$  NMR (151 MHz,  $\text{CDCl}_3$ )  $\delta$  187.98, 143.14, 130.62, 130.03, 127.85, 120.53, 38.03, 35.87.

$^{11}\text{B}$  NMR (193 MHz,  $\text{CDCl}_3$ )  $\delta$  -24.70 (t,  $J = 88.8$  Hz).

$^{11}\text{B}\{^1\text{H}\}$  NMR (193 MHz,  $\text{CDCl}_3$ )  $\delta$  -24.70.

$^1\text{H}\{^{11}\text{B}\}$  NMR (600 MHz,  $\text{CDCl}_3$ )  $\delta$  7.16 (q,  $J$  = 8.6 Hz, 4H), 6.75 (s, 2H), 3.65 (s, 6H), 2.99 (dd,  $J$  = 14.4, 10.5 Hz, 1H), 2.69 (dd,  $J$  = 14.5, 4.1 Hz, 1H), 2.11 (dd,  $J$  = 9.6, 5.0 Hz, 1H), 1.63 (d,  $J$  = 36.5 Hz, 2H).

HRMS (ESI-TOF)  $m/z$ :  $[\text{M} + \text{Na}]^+$  cacl. for  $\text{C}_{14}\text{H}_{18}\text{BClN}_2\text{NaO}_2$  315.1048; found: 315.1036.

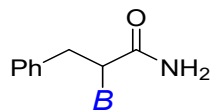

(1-amino-1-oxo-3-phenylpropan-2-yl)(1,3-dimethyl-1H-imidazol-3-ium-2-yl) dihydroborate (**8a**): Colorless liquid (26 mg, 50% yield); Gradient eluent: DCM/MeOH: 50/1 to 20/1.

$^1\text{H}$  NMR (600 MHz,  $\text{CDCl}_3$ )  $\delta$  7.18 (d,  $J$  = 4.4 Hz, 4H), 7.07 (dt,  $J$  = 8.7, 4.4 Hz, 1H), 6.74 (s, 2H), 5.28 (s, 2H), 3.69 (s, 6H), 2.94 (dd,  $J$  = 14.4, 10.1 Hz, 1H), 2.71 (dd,  $J$  = 14.4, 4.7 Hz, 1H), 2.08 (s, 1H), 1.63 (dd,  $J$  = 178.7, 89.0 Hz, 2H).

$^{13}\text{C}$  NMR (151 MHz,  $\text{CDCl}_3$ )  $\delta$  185.28, 144.20, 128.37, 127.95, 125.17, 120.57, 39.66, 36.13.  $^{11}\text{B}$  NMR (193 MHz,  $\text{CDCl}_3$ )  $\delta$  -24.58 (t,  $J$  = 88.9 Hz).

$^{11}\text{B}\{^1\text{H}\}$  NMR (193 MHz,  $\text{CDCl}_3$ )  $\delta$  -24.58.

$^1\text{H}\{^{11}\text{B}\}$  NMR (600 MHz,  $\text{CDCl}_3$ )  $\delta$  7.18 (d,  $J$  = 4.4 Hz, 4H), 7.07 (dt,  $J$  = 8.6, 4.4 Hz, 1H), 6.74 (s, 2H), 5.27 (s, 2H), 3.69 (s, 6H), 2.94 (dd,  $J$  = 14.4, 10.0 Hz, 1H), 2.71 (dd,  $J$  = 14.5, 4.8 Hz, 1H), 2.08 (dq,  $J$  = 10.0, 5.0 Hz, 1H), 1.63 (d,  $J$  = 2.7 Hz, 2H).

Characterization agrees with previous reports for this compound.<sup>4</sup>

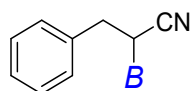

(1-cyano-2-phenylethyl)(1,3-dimethyl-1H-imidazol-3-ium-2-yl) dihydroborate (**9a**): Colorless liquid (33 mg, 69% yield); Gradient eluent: EtOAc/petroleum ether: 1/2 to 1/1.

$^1\text{H}$  NMR (600 MHz,  $\text{CDCl}_3$ )  $\delta$  7.28 (d,  $J$  = 4.6 Hz, 4H), 7.18 (dt,  $J$  = 8.6, 3.8 Hz, 1H), 6.86 (s, 2H), 3.83 (s, 6H), 2.87 (dd,  $J$  = 14.0, 4.6 Hz, 1H), 2.82 (dd,  $J$  = 13.9, 10.4 Hz, 1H), 1.88 (s, 1H), 1.82 – 1.45 (m, 2H).

$^{13}\text{C}$  NMR (151 MHz,  $\text{CDCl}_3$ )  $\delta$  142.51, 129.10, 128.55, 128.25, 125.97, 120.95, 40.02, 36.40.

$^{11}\text{B}$  NMR (193 MHz,  $\text{CDCl}_3$ )  $\delta$  25.90 (t,  $J$  = 90.9 Hz).

$^{11}\text{B}\{^1\text{H}\}$  NMR (193 MHz,  $\text{CDCl}_3$ )  $\delta$  -25.90.

$^1\text{H}\{^{11}\text{B}\}$  NMR (600 MHz,  $\text{CDCl}_3$ )  $\delta$  7.29 – 7.26 (m, 4H), 7.17 (ddd,  $J$  = 8.6, 5.2, 3.4 Hz, 1H), 6.85 (s, 2H), 3.83 (s, 6H), 2.86 (dd,  $J$  = 14.0, 4.9 Hz, 1H), 2.81 (dd,  $J$  = 13.9, 10.3 Hz, 1H), 1.87 (qd,  $J$  = 9.9, 4.8 Hz, 1H), 1.69 (d,  $J$  = 40.4 Hz, 2H).

Characterization agrees with previous reports for this compound.<sup>4</sup>

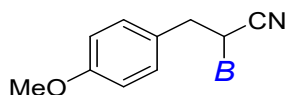

(1-cyano-2-(4-methoxyphenyl)ethyl)(1,3-dimethyl-1H-imidazol-3-ium-2-yl) dihydroborate (**9b**): Colorless liquid (44 mg, 82% yield); Gradient eluent: EtOAc/petroleum ether: 1/2 to 1/1.

$^1\text{H NMR}$  (600 MHz,  $\text{CDCl}_3$ )  $\delta$  7.19 (d,  $J = 8.6$  Hz, 2H), 6.85 (s, 2H), 6.82 (d,  $J = 8.6$  Hz, 2H), 3.82 (s, 6H), 3.77 (s, 3H), 2.80 (dd,  $J = 14.0, 4.6$  Hz, 1H), 2.74 (dd,  $J = 13.9, 10.4$  Hz, 1H), 1.83 (s, 1H), 1.78 – 1.30 (m, 2H).

$^{13}\text{C NMR}$  (151 MHz,  $\text{CDCl}_3$ )  $\delta$  157.87, 134.73, 129.48, 129.23, 120.96, 113.66, 55.26, 39.16, 36.38.

$^{11}\text{B NMR}$  (193 MHz,  $\text{CDCl}_3$ )  $\delta$  -25.97 (t,  $J = 90.4$  Hz).

$^{11}\text{B}\{^1\text{H}\}$  NMR (193 MHz,  $\text{CDCl}_3$ )  $\delta$  -25.97.

$^1\text{H}\{^{11}\text{B}\}$  NMR (600 MHz,  $\text{CDCl}_3$ )  $\delta$  7.19 (d,  $J = 8.5$  Hz, 2H), 6.85 (s, 2H), 6.82 (d,  $J = 8.5$  Hz, 2H), 3.82 (s, 6H), 3.77 (s, 3H), 2.80 (dd,  $J = 14.1, 4.8$  Hz, 1H), 2.74 (dd,  $J = 13.9, 10.5$  Hz, 1H), 1.83 (td,  $J = 12.1, 4.7$  Hz, 1H), 1.67 (d,  $J = 35.3$  Hz, 2H).

Characterization agrees with previous reports for this compound.<sup>4</sup>

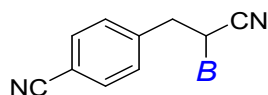

(1-cyano-2-(4-cyanophenyl)ethyl)(1,3-dimethyl-1H-imidazol-3-ium-2-yl) dihydroborate (**9c**): Colorless liquid (18 mg, 34% yield); Gradient eluent: EtOAc/petroleum ether: 1/2 to 1/1.

$^1\text{H NMR}$  (600 MHz,  $\text{CDCl}_3$ )  $\delta$  7.57 (d,  $J = 8.0$  Hz, 2H), 7.39 (d,  $J = 8.0$  Hz, 2H), 6.89 (s, 2H), 3.85 (s, 6H), 2.93 (dd,  $J = 14.0, 4.9$  Hz, 1H), 2.87 (dd,  $J = 13.7, 10.4$  Hz, 1H), 1.84 (ddd,  $J = 13.9, 9.4, 4.7$  Hz, 1H), 1.66 (d,  $J = 44.8$  Hz, 2H).

$^{13}\text{C NMR}$  (151 MHz,  $\text{CDCl}_3$ )  $\delta$  147.93, 132.11, 129.47, 128.30, 121.05, 119.26, 109.82, 40.00, 36.41.

$^{11}\text{B NMR}$  (193 MHz,  $\text{CDCl}_3$ )  $\delta$  -26.00 (t,  $J = 90.7$  Hz).

$^{11}\text{B}\{^1\text{H}\}$  NMR (193 MHz,  $\text{CDCl}_3$ )  $\delta$  -25.99.

$^1\text{H}\{^{11}\text{B}\}$  NMR (600 MHz,  $\text{CDCl}_3$ )  $\delta$  7.57 (d,  $J = 8.0$  Hz, 2H), 7.39 (d,  $J = 8.0$  Hz, 2H), 6.89 (s, 2H), 3.85 (s, 6H), 2.93 (dd,  $J = 14.0, 4.9$  Hz, 1H), 2.87 (dd,  $J = 13.7, 10.4$  Hz, 1H), 1.84 (ddd,  $J = 13.9, 9.4, 4.7$  Hz, 1H), 1.66 (d,  $J = 44.8$  Hz, 2H).

HRMS (ESI-TOF)  $m/z$ :  $[\text{M} + \text{Na}]^+$  calcd. for  $\text{C}_{15}\text{H}_{17}\text{BN}_4\text{Na}$  287.1444; found: 287.1443.

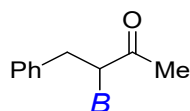

(1,3-dimethyl-1H-imidazol-3-ium-2-yl)(3-oxo-1-phenylbutan-2-yl) dihydroborate (**10a**): Colorless liquid (38 mg, 65% yield); Gradient eluent: EtOAc/petroleum ether: 1/2 to 1/1.

$^1\text{H NMR}$  (600 MHz,  $\text{CDCl}_3$ )  $\delta$  7.17 (t,  $J = 7.5$  Hz, 2H), 7.11 (d,  $J = 7.2$  Hz, 2H), 7.07

(t,  $J = 7.3$  Hz, 1H), 6.79 (s, 2H), 3.70 (s, 6H), 3.09 (dd,  $J = 14.5, 9.7$  Hz, 1H), 2.65 (dd,  $J = 14.6, 4.5$  Hz, 1H), 2.58 (s, 1H), 2.00 (s, 3H), 1.89 – 1.47 (m, 2H).

$^{13}\text{C}$  NMR (151 MHz,  $\text{CDCl}_3$ )  $\delta$  217.52, 144.39, 128.27, 127.95, 125.06, 120.63, 38.34, 36.15, 28.30.

$^{11}\text{B}$  NMR (193 MHz,  $\text{CDCl}_3$ )  $\delta$  -25.33 (t,  $J = 90.7$  Hz).

$^{11}\text{B}\{^1\text{H}\}$  NMR (193 MHz,  $\text{CDCl}_3$ )  $\delta$  -25.33.

$^1\text{H}\{^{11}\text{B}\}$  NMR (600 MHz,  $\text{CDCl}_3$ )  $\delta$  7.17 (t,  $J = 7.5$  Hz, 2H), 7.11 (d,  $J = 7.3$  Hz, 2H), 7.06 (t,  $J = 7.3$  Hz, 1H), 6.79 (s, 2H), 3.70 (s, 6H), 3.09 (dd,  $J = 14.6, 9.6$  Hz, 1H), 2.65 (dd,  $J = 14.6, 4.7$  Hz, 1H), 2.58 (td,  $J = 10.0, 5.0$  Hz, 1H), 2.00 (s, 3H), 1.61 (d,  $J = 31.5$  Hz, 2H).

Characterization agrees with previous reports for this compound.<sup>3</sup>

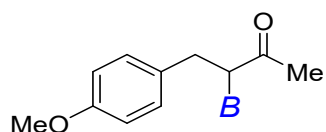

(1,3-dimethyl-1H-imidazol-3-ium-2-yl)(1-(4-methoxyphenyl)-3-oxobutan-2-yl) dihydroborate (**10b**): Colorless liquid (38 mg, 65% yield); Gradient eluent: EtOAc/petroleum ether: 1/2 to 1/1.

$^1\text{H}$  NMR (600 MHz,  $\text{CDCl}_3$ )  $\delta$  7.03 (d,  $J = 8.6$  Hz, 2H), 6.80 (s, 2H), 6.72 (d,  $J = 8.6$  Hz, 2H), 3.73 (s, 3H), 3.70 (s, 6H), 3.01 (dd,  $J = 14.5, 9.7$  Hz, 1H), 2.58 (dd,  $J = 14.5, 4.5$  Hz, 1H), 2.53 (s, 1H), 1.99 (s, 3H), 1.66 (dd,  $J = 107.0, 74.3$  Hz, 2H).

$^{13}\text{C}$  NMR (151 MHz,  $\text{CDCl}_3$ )  $\delta$  217.69, 157.18, 136.60, 129.09, 120.64, 113.38, 55.23, 37.43, 36.15, 28.30.

$^{11}\text{B}$  NMR (193 MHz,  $\text{CDCl}_3$ )  $\delta$  -25.36 (t,  $J = 90.2$  Hz).

$^{11}\text{B}\{^1\text{H}\}$  NMR (193 MHz,  $\text{CDCl}_3$ )  $\delta$  -25.36.

$^1\text{H}\{^{11}\text{B}\}$  NMR (600 MHz,  $\text{CDCl}_3$ )  $\delta$  7.03 (d,  $J = 8.5$  Hz, 2H), 6.79 (s, 2H), 6.72 (d,  $J = 8.6$  Hz, 2H), 3.73 (s, 3H), 3.70 (s, 6H), 3.01 (dd,  $J = 14.5, 9.7$  Hz, 1H), 2.58 (dd,  $J = 14.5, 4.7$  Hz, 1H), 2.53 (td,  $J = 9.9, 5.0$  Hz, 1H), 1.98 (s, 3H), 1.59 (d,  $J = 31.1$  Hz, 2H).

HRMS (ESI-TOF)  $m/z$ :  $[\text{M} + \text{Na}]^+$  cacl. for  $\text{C}_{16}\text{H}_{23}\text{BN}_2\text{NaO}_2$  309.1750; found: 309.1743.

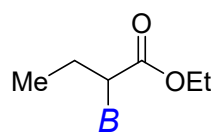

(1,3-dimethyl-1H-imidazol-3-ium-2-yl)(1-ethoxy-1-oxobutan-2-yl)dihydroborate (**11a- $\alpha$** ): Colorless liquid (5 mg, 5% yield); Gradient eluent: EtOAc/petroleum ether: 1/3 to 1/1.

$^1\text{H}$  NMR (600 MHz,  $\text{CDCl}_3$ )  $\delta$  6.81 (s, 2H), 3.92 – 3.81 (m, 2H), 3.74 (s, 6H), 1.73 (dd,  $J = 10.7, 5.6$  Hz, 2H), 1.59 (dd,  $J = 73.3, 27.3$  Hz, 2H), 1.39 (dd,  $J = 10.0, 6.1$  Hz, 1H), 1.05 (t,  $J = 7.1$  Hz, 3H), 0.88 (t,  $J = 7.1$  Hz, 3H).

$^{13}\text{C}$  NMR (151 MHz,  $\text{CDCl}_3$ )  $\delta$  182.51, 120.28, 58.39, 36.05, 26.32, 14.96, 14.46.

$^{11}\text{B}$  NMR (193 MHz,  $\text{CDCl}_3$ )  $\delta$  -25.07 (t,  $J = 89.3$  Hz).

$^{11}\text{B}\{^1\text{H}\}$  NMR (193 MHz,  $\text{CDCl}_3$ )  $\delta$  -25.31.

$^1\text{H}\{^{11}\text{B}\}$  NMR (600 MHz,  $\text{CDCl}_3$ )  $\delta$  6.81 (s, 2H), 3.92 – 3.81 (m, 2H), 3.74 (s, 6H), 1.72 (d,  $J = 5.0$  Hz, 2H), 1.53 (d,  $J = 48.3$  Hz, 2H), 1.41 – 1.37 (m, 1H), 1.05 (t,  $J = 7.1$  Hz, 3H), 0.88 (t,  $J = 7.1$  Hz, 3H).

Characterization agrees with previous reports for this compound.<sup>3</sup>

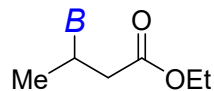

(1,3-dimethyl-1H-imidazol-3-ium-2-yl)(4-ethoxy-4-oxobutan-2-yl)dihydroborate (**11a- $\beta$** ): Colorless liquid (57 mg, 64% yield); Gradient eluent: EtOAc/petroleum ether: 1/3 to 1/1.

$^1\text{H}$  NMR (600 MHz,  $\text{CDCl}_3$ )  $\delta$  6.79 (s, 2H), 3.99 (q,  $J = 7.1$  Hz, 2H), 3.74 (s, 6H), 2.18 (dd,  $J = 14.0, 6.3$  Hz, 1H), 2.06 (dd,  $J = 13.5, 9.1$  Hz, 1H), 1.61 – 1.21 (m, 2H), 1.19 (t,  $J = 7.1$  Hz, 3H), 1.17 (dt,  $J = 13.0, 6.5$  Hz, 1H), 0.79 (d,  $J = 6.0$  Hz, 3H).

$^{13}\text{C}$  NMR (151 MHz,  $\text{CDCl}_3$ )  $\delta$  176.42, 120.17, 59.36, 44.61, 36.05, 22.39, 14.39.

$^{11}\text{B}$  NMR (193 MHz,  $\text{CDCl}_3$ )  $\delta$  -24.06 (t,  $J = 84.4$  Hz).

$^{11}\text{B}\{^1\text{H}\}$  NMR (193 MHz,  $\text{CDCl}_3$ )  $\delta$  -24.06.

$^1\text{H}\{^{11}\text{B}\}$  NMR (600 MHz,  $\text{CDCl}_3$ )  $\delta$  6.82 (s, 2H), 4.03 (q,  $J = 7.1$  Hz, 2H), 3.78 (s, 6H), 2.21 (dd,  $J = 14.0, 6.5$  Hz, 1H), 2.10 (dd,  $J = 14.0, 8.8$  Hz, 1H), 1.36 – 1.32 (m, 1H), 1.22 (t,  $J = 7.1$  Hz, 3H), 1.17 (dt,  $J = 13.0, 6.5$  Hz, 1H), 0.83 (d,  $J = 6.9$  Hz, 3H).

Characterization agrees with previous reports for this compound.<sup>3</sup>

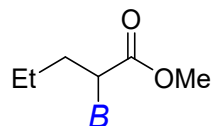

(1,3-dimethyl-1H-imidazol-3-ium-2-yl)(1-methoxy-1-oxopentan-2-yl)dihydroborate (**11b- $\alpha$** ): Colorless liquid (5 mg, 6% yield); Gradient eluent: EtOAc/petroleum ether: 1/2 to 1/1.

$^1\text{H}$  NMR (600 MHz,  $\text{CDCl}_3$ )  $\delta$  6.82 (s, 2H), 3.74 (s, 6H), 3.43 (s, 3H), 1.83 (s, 1H), 1.74 (dd,  $J = 18.1, 9.6$  Hz, 1H), 1.65 – 1.36 (m, 2H), 1.34 – 1.29 (m, 2H), 1.26 – 1.22 (m, 1H), 0.85 (t,  $J = 7.1$  Hz, 3H).

$^{13}\text{C}$  NMR (151 MHz,  $\text{CDCl}_3$ )  $\delta$  182.89, 120.33, 50.29, 36.03, 35.66, 23.52, 14.36.

$^{11}\text{B}$  NMR (193 MHz,  $\text{CDCl}_3$ )  $\delta$  -25.19 (t,  $J = 89.6$  Hz).

$^{11}\text{B}\{^1\text{H}\}$  NMR (193 MHz,  $\text{CDCl}_3$ )  $\delta$  -25.19.

$^1\text{H}\{^{11}\text{B}\}$  NMR (600 MHz,  $\text{CDCl}_3$ )  $\delta$  6.81 (s, 2H), 3.74 (s, 6H), 3.43 (s, 3H), 1.83 (dt,  $J = 9.8, 4.9$  Hz, 1H), 1.74 (dd,  $J = 17.9, 9.7$  Hz, 1H), 1.54 (dt,  $J = 44.9, 7.9$  Hz, 2H), 1.34 – 1.30 (m, 2H), 1.26 – 1.22 (m, 1H), 0.85 (t,  $J = 7.1$  Hz, 3H).

HRMS (ESI-TOF)  $m/z$ :  $[\text{M} + \text{Na}]^+$  cacl'd. for  $\text{C}_{11}\text{H}_{21}\text{BN}_2\text{NaO}_2$  247.1594; found: 247.1586.

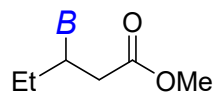



(1,3-dimethyl-1H-imidazol-3-ium-2-yl)(1-methoxy-1-oxopentan-3-yl)dihydroborate (**11b-β**): Colorless liquid (54 mg, 60% yield); Gradient eluent: EtOAc/petroleum ether: 1/2 to 1/1.

$^1\text{H NMR}$  (600 MHz,  $\text{CDCl}_3$ )  $\delta$  6.77 (s, 2H), 3.73 (s, 6H), 3.48 (s, 3H), 2.25 (dd,  $J = 12.7, 5.5$  Hz, 1H), 2.01 (dd,  $J = 14.0, 8.4$  Hz, 1H), 1.61 – 1.23 (m, 2H), 1.21 (dd,  $J = 13.9, 7.0$  Hz, 2H), 0.99 (s, 1H), 0.81 (t,  $J = 7.4$  Hz, 3H).

$^{13}\text{C NMR}$  (151 MHz,  $\text{CDCl}_3$ )  $\delta$  177.07, 120.16, 50.78, 41.75, 35.99, 30.00, 13.22.

$^{11}\text{B NMR}$  (193 MHz,  $\text{CDCl}_3$ )  $\delta$  -25.31 (t,  $J = 84.4$  Hz).

$^{11}\text{B}\{^1\text{H}\}$  NMR (193 MHz,  $\text{CDCl}_3$ )  $\delta$  -25.31.

$^1\text{H}\{^{11}\text{B}\}$  NMR (600 MHz,  $\text{CDCl}_3$ )  $\delta$  6.77 (s, 2H), 3.73 (s, 6H), 3.48 (s, 3H), 2.25 (dd,  $J = 14.1, 6.8$  Hz, 1H), 2.01 (dd,  $J = 14.0, 8.3$  Hz, 1H), 1.34 (s, 1H), 1.21 (dq,  $J = 13.4, 6.6$  Hz, 3H), 0.99 (dt,  $J = 12.5, 6.3$  Hz, 1H), 0.81 (t,  $J = 7.4$  Hz, 3H).

Characterization agrees with previous reports for this compound.<sup>4</sup>

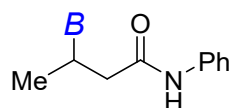

(1,3-dimethyl-1H-imidazol-3-ium-2-yl)(4-oxo-4-(phenylamino)butan-2-yl)dihydroborate (**11c**): White solid (30 mg, 55% yield); Gradient eluent: EtOAc/petroleum ether: 1/1 to 2/1.

$^1\text{H NMR}$  (600 MHz,  $\text{CDCl}_3$ )  $\delta$  7.83 (s, 1H), 7.53 (d,  $J = 7.9$  Hz, 2H), 7.28 (d,  $J = 7.7$  Hz, 2H), 7.03 (t,  $J = 7.4$  Hz, 1H), 6.79 (s, 2H), 3.76 (s, 6H), 2.32 (dd,  $J = 13.8, 7.3$  Hz, 1H), 2.24 (dd,  $J = 13.6, 6.8$  Hz, 1H), 1.76 – 1.35 (m, 2H), 1.19 (s, 1H), 0.84 (d,  $J = 6.6$  Hz, 3H).

$^{13}\text{C NMR}$  (151 MHz,  $\text{CDCl}_3$ )  $\delta$  174.65, 138.77, 128.82, 123.38, 120.32, 119.60, 48.69, 36.14, 22.57.

$^{11}\text{B NMR}$  (193 MHz,  $\text{CDCl}_3$ )  $\delta$  -24.03 (t,  $J = 84.0$  Hz).

$^{11}\text{B}\{^1\text{H}\}$  NMR (193 MHz,  $\text{CDCl}_3$ )  $\delta$  -24.03.

$^1\text{H}\{^{11}\text{B}\}$  NMR (600 MHz,  $\text{CDCl}_3$ )  $\delta$  7.82 (s, 1H), 7.53 (d,  $J = 7.9$  Hz, 2H), 7.29 – 7.26 (m, 2H), 7.03 (t,  $J = 7.3$  Hz, 1H), 6.79 (s, 2H), 3.76 (s, 6H), 2.32 (dd,  $J = 13.9, 7.4$  Hz, 1H), 2.24 (dd,  $J = 13.9, 6.9$  Hz, 1H), 1.58 – 1.40 (m, 2H), 1.18 (td,  $J = 13.1, 6.6$  Hz, 1H), 0.84 (d,  $J = 6.9$  Hz, 3H).

HRMS (ESI-TOF)  $m/z$ :  $[\text{M} + \text{Na}]^+$  calcd. for  $\text{C}_{15}\text{H}_{22}\text{BN}_3\text{NaO}$  294.1754; found: 294.1750.

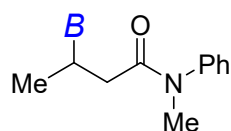

(1,3-dimethyl-1H-imidazol-3-ium-2-yl)(4-(methyl(phenyl)amino)-4-oxobutan-2-yl)dihydroborate (**11d**): White solid (28 mg, 50% yield); Gradient eluent: EtOAc/petroleum ether: 1/1 to 3/1.

$^1\text{H NMR}$  (600 MHz,  $\text{CDCl}_3$ )  $\delta$  7.34 (t,  $J = 7.7$  Hz, 2H), 7.24 (d,  $J = 7.2$  Hz, 1H), 7.17 (d,  $J = 7.5$  Hz, 2H), 6.74 (s, 2H), 3.65 (s, 6H), 3.23 (s, 3H), 2.07 (s, 1H), 1.92 (s, 1H),

1.16 (d,  $J = 51.5$  Hz, 3H), 0.72 (d,  $J = 4.6$  Hz, 3H).

$^{13}\text{C}$  NMR (151 MHz,  $\text{CDCl}_3$ )  $\delta$  176.19, 145.18, 129.23, 127.69, 126.90, 120.03, 43.72, 37.32, 35.99, 22.19.

$^{11}\text{B}$  NMR (193 MHz,  $\text{CDCl}_3$ )  $\delta$  -24.09 (t,  $J = 84.4$  Hz).

$^{11}\text{B}\{^1\text{H}\}$  NMR (193 MHz,  $\text{CDCl}_3$ )  $\delta$  -24.09.

$^1\text{H}\{^{11}\text{B}\}$  NMR (600 MHz,  $\text{CDCl}_3$ )  $\delta$  7.34 (t,  $J = 7.7$  Hz, 2H), 7.24 (d,  $J = 7.2$  Hz, 1H), 7.17 (d,  $J = 7.5$  Hz, 2H), 6.74 (s, 2H), 3.65 (s, 6H), 3.23 (s, 3H), 2.07 (s, 1H), 1.92 (s, 1H), 1.16 (d,  $J = 51.5$  Hz, 3H), 0.72 (d,  $J = 4.6$  Hz, 3H).

HRMS (ESI-TOF)  $m/z$ :  $[\text{M} + \text{Na}]^+$  calcd. for  $\text{C}_{16}\text{H}_{24}\text{BN}_3\text{NaO}$  308.1910; found: 308.1907.

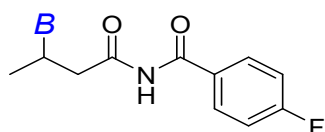

(1,3-dimethyl-1H-imidazol-3-ium-2-yl)(4-(4-fluorobenzamido)-4-oxobutan-2-yl)dihydroborate (**11e**): White solid (18 mg, 28% yield); Gradient eluent: EtOAc/petroleum ether: 1/2 to 1/1.

$^1\text{H}$  NMR (600 MHz,  $\text{CDCl}_3$ )  $\delta$  8.88 (s, 1H), 7.90 (ddd,  $J = 8.2, 5.1, 2.5$  Hz, 2H), 7.15 – 7.11 (m, 2H), 6.84 (s, 2H), 3.78 (s, 6H), 2.67 (dd,  $J = 14.0, 6.5$  Hz, 1H), 2.52 (dd,  $J = 14.0, 7.4$  Hz, 1H), 1.41 – 1.28 (m, 2H), 1.22 – 1.17 (m, 1H), 0.85 (d,  $J = 6.9$  Hz, 3H).

$^{13}\text{C}$  NMR (151 MHz,  $\text{CDCl}_3$ )  $\delta$  176.69, 165.37 (d,  $J = 253.7$  Hz), 164.34, 130.35 (d,  $J = 9.1$  Hz), 130.08 (d,  $J = 3.0$  Hz), 120.35, 115.92 (d,  $J = 21.1$  Hz), 48.06, 36.15, 22.25.

$^{11}\text{B}$  NMR (193 MHz,  $\text{CDCl}_3$ )  $\delta$  -23.91 (t,  $J = 84.2$  Hz).

$^{11}\text{B}\{^1\text{H}\}$  NMR (193 MHz,  $\text{CDCl}_3$ )  $\delta$  -23.91.

$^1\text{H}\{^{11}\text{B}\}$  NMR (600 MHz,  $\text{CDCl}_3$ )  $\delta$  8.87 (s, 1H), 7.90 (dd,  $J = 8.7, 5.3$  Hz, 2H), 7.13 (t,  $J = 8.5$  Hz, 2H), 6.84 (s, 2H), 3.78 (s, 6H), 2.67 (dd,  $J = 14.1, 6.6$  Hz, 1H), 2.52 (dd,  $J = 14.1, 7.4$  Hz, 1H), 1.59 – 1.45 (m, 2H), 1.20 (dd,  $J = 11.9, 6.2$  Hz, 1H), 0.86 (d,  $J = 6.9$  Hz, 3H).

Characterization agrees with previous reports for this compound.<sup>5</sup>

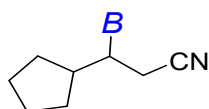

(1-cyano-2-cyclopentylethyl)(1,3-dimethyl-1H-imidazol-3-ium-2-yl)dihydroborate (**11f**): Colorless liquid (23 mg, 49% yield); Gradient eluent: EtOAc/petroleum ether: 1/2 to 1/1.

$^1\text{H}$  NMR (600 MHz,  $\text{CDCl}_3$ )  $\delta$  6.83 (s, 2H), 3.78 (s, 6H), 2.23 (d,  $J = 15.6$  Hz, 1H), 2.12 (dd,  $J = 16.3, 8.5$  Hz, 1H), 1.80 – 1.72 (m, 2H), 1.65 – 1.60 (m, 1H), 1.58 – 1.51 (m, 2H), 1.46 (dd,  $J = 20.0, 6.1$  Hz, 2H), 1.44 – 1.15 (m, 2H), 1.11 – 1.03 (m, 2H), 0.87 (s, 1H).

$^{13}\text{C}$  NMR (151 MHz,  $\text{CDCl}_3$ )  $\delta$  122.67, 120.50, 46.98, 36.10, 32.07, 31.68, 25.48, 25.43, 23.33.

$^{11}\text{B}$  NMR (193 MHz,  $\text{CDCl}_3$ )  $\delta$  -26.00 (t,  $J = 85.2$  Hz).

$^{11}\text{B}\{^1\text{H}\}$  NMR (193 MHz,  $\text{CDCl}_3$ )  $\delta$  -26.00.  $^1\text{H}\{^{11}\text{B}\}$  NMR (600 MHz,  $\text{CDCl}_3$ )  $\delta$  6.84

(s, 2H), 3.79 (s, 6H), 2.25 (dd,  $J = 16.4, 4.8$  Hz, 1H), 2.13 (dd,  $J = 16.4, 8.6$  Hz, 1H), 1.81 – 1.74 (m, 2H), 1.66 – 1.62 (m, 1H), 1.56 (dd,  $J = 18.5, 12.2$  Hz, 2H), 1.49 (dd,  $J = 12.7, 5.2$  Hz, 2H), 1.42 (d,  $J = 45.9$  Hz, 2H), 1.14 – 1.06 (m, 2H), 0.92 – 0.86 (m, 1H).

Characterization agrees with previous reports for this compound.<sup>4</sup>

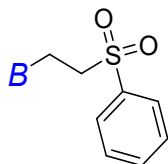

(1,3-dimethyl-1H-imidazol-3-ium-2-yl)(2-(phenylsulfonyl)ethyl)dihydroborate (**11g**): Colorless liquid (21 mg, 39% yield); Gradient eluent: EtOAc/petroleum ether: 1/1 to 2/1.

<sup>1</sup>H NMR (600 MHz, CDCl<sub>3</sub>) δ 7.87 (d,  $J = 7.2$  Hz, 2H), 7.57 (t,  $J = 7.4$  Hz, 1H), 7.50 (t,  $J = 7.7$  Hz, 2H), 6.80 (s, 2H), 3.69 (s, 6H), 3.09 – 3.01 (m, 2H), 1.57 – 1.22 (m, 2H), 0.67 (s, 2H).

<sup>13</sup>C NMR (151 MHz, CDCl<sub>3</sub>) δ 139.90, 132.85, 128.83, 128.11, 120.44, 60.23, 35.92.

<sup>11</sup>B NMR (193 MHz, CDCl<sub>3</sub>) δ -27.88 (t,  $J = 86.0$  Hz).

<sup>11</sup>B{<sup>1</sup>H} NMR (193 MHz, CDCl<sub>3</sub>) δ -27.88. <sup>1</sup>H{<sup>11</sup>B} NMR (600 MHz, CDCl<sub>3</sub>) δ 7.87 (d,  $J = 7.3$  Hz, 2H), 7.57 (t,  $J = 7.4$  Hz, 1H), 7.50 (t,  $J = 7.6$  Hz, 2H), 6.80 (s, 2H), 3.69 (s, 6H), 3.07 – 3.02 (m, 2H), 1.33 (s, 2H), 0.70 – 0.63 (m, 2H).

HRMS (ESI-TOF)  $m/z$ : [M + Na]<sup>+</sup> cacl. for C<sub>13</sub>H<sub>19</sub>BN<sub>2</sub>NaO<sub>2</sub>S 301.1158; found: 301.1155.

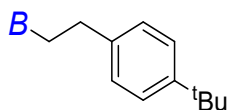

(4-(tert-butyl)phenethyl)(1,3-dimethyl-1H-imidazol-3-ium-2-yl)dihydroborate (**11h**): Colorless liquid (11 mg, 20% yield); Gradient eluent: EtOAc/petroleum ether: 1/3 to 1/1.

<sup>1</sup>H NMR (600 MHz, CDCl<sub>3</sub>) δ 7.23 (d,  $J = 8.1$  Hz, 2H), 7.12 (d,  $J = 8.1$  Hz, 2H), 6.75 (s, 2H), 3.76 (s, 6H), 2.54 – 2.50 (m, 2H), 1.55 – 1.38 (m, 2H), 1.29 (s, 9H), 0.78 (s, 2H).

<sup>13</sup>C NMR (151 MHz, CDCl<sub>3</sub>) δ 147.12, 145.06, 127.48, 124.74, 119.97, 38.14, 35.94, 34.23, 31.49.

<sup>11</sup>B NMR (193 MHz, CDCl<sub>3</sub>) δ -27.04 (t,  $J = 83.5$  Hz).

<sup>11</sup>B{<sup>1</sup>H} NMR (193 MHz, CDCl<sub>3</sub>) δ -27.05. <sup>1</sup>H{<sup>11</sup>B} NMR (600 MHz, CDCl<sub>3</sub>) δ 7.23 (d,  $J = 8.1$  Hz, 2H), 7.12 (d,  $J = 8.0$  Hz, 2H), 6.75 (s, 2H), 3.76 (s, 6H), 2.55 – 2.49 (m, 2H), 1.57 (d,  $J = 31.6$  Hz, 2H), 1.29 (s, 9H), 0.78 (td,  $J = 11.4, 5.7$  Hz, 2H).

HRMS (ESI-TOF)  $m/z$ : [M + Na]<sup>+</sup> cacl. for C<sub>17</sub>H<sub>27</sub>BN<sub>2</sub>Na 293.2165; found: 293.2158.

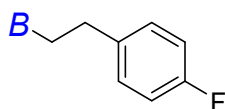

(1,3-dimethyl-1H-imidazol-3-ium-2-yl)(4-fluorophenethyl)dihydroborate (11i):  
Colorless liquid (13 mg, 28% yield); Gradient eluent: EtOAc/petroleum ether: 1/3 to 1/1.

$^1\text{H NMR}$  (600 MHz,  $\text{CDCl}_3$ )  $\delta$  7.12 (dd,  $J = 8.3, 5.8$  Hz, 2H), 6.88 (t,  $J = 8.8$  Hz, 2H), 6.77 (s, 2H), 3.75 (s, 6H), 2.55 – 2.47 (m, 2H), 1.61 – 1.26 (m, 2H), 0.73 (s, 2H).

$^{13}\text{C NMR}$  (151 MHz,  $\text{CDCl}_3$ )  $\delta$  160.56 (d,  $J = 240.1$  Hz), 143.68, 129.05 (d,  $J = 7.6$  Hz), 120.04, 114.43 (d,  $J = 21.1$  Hz), 37.87, 35.93.

$^{11}\text{B NMR}$  (193 MHz,  $\text{CDCl}_3$ )  $\delta$  -27.18 (t,  $J = 84.0$  Hz).

$^{11}\text{B}\{^1\text{H}\}$  NMR (193 MHz,  $\text{CDCl}_3$ )  $\delta$  -27.17.

$^1\text{H}\{^{11}\text{B}\}$  NMR (600 MHz,  $\text{CDCl}_3$ )  $\delta$  7.12 (dd,  $J = 8.2, 5.9$  Hz, 2H), 6.87 (t,  $J = 8.8$  Hz, 2H), 6.76 (s, 2H), 3.75 (s, 6H), 2.53 – 2.49 (m, 2H), 1.51 (s, 2H), 0.73 (tt,  $J = 11.7, 5.9$  Hz, 2H).

$^{19}\text{F NMR}$  (565 MHz,  $\text{CDCl}_3$ )  $\delta$  -120.00.

HRMS (ESI-TOF)  $m/z$ :  $[\text{M} + \text{Na}]^+$  cacl'd. for  $\text{C}_{13}\text{H}_{18}\text{BFN}_2\text{Na}$  255.1445; found: 255.1455.

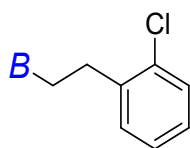

(2-chlorophenethyl)(1,3-dimethyl-1H-imidazol-3-ium-2-yl)dihydroborate (11j):  
Colorless liquid (16 mg, 32% yield); Gradient eluent: EtOAc/petroleum ether: 1/3 to 1/1;

$^1\text{H NMR}$  (600 MHz,  $\text{CDCl}_3$ )  $\delta$  7.28 (dd,  $J = 7.6, 1.3$  Hz, 1H), 7.25 (d,  $J = 7.1$  Hz, 1H), 7.12 (td,  $J = 7.5, 0.9$  Hz, 1H), 7.02 (td,  $J = 7.7, 1.6$  Hz, 1H), 6.79 (s, 2H), 3.79 (s, 6H), 2.62 – 2.54 (m, 2H), 1.79 – 1.45 (m, 2H), 0.74 (s, 2H).

$^{13}\text{C NMR}$  (151 MHz,  $\text{CDCl}_3$ )  $\delta$  145.38, 133.45, 129.77, 128.94, 126.46, 125.92, 120.08, 36.05, 35.96.

$^{11}\text{B}\{^1\text{H}\}$  NMR (193 MHz,  $\text{CDCl}_3$ )  $\delta$  -27.19 (t,  $J = 83.9$  Hz).

$^{11}\text{B NMR}$  (193 MHz,  $\text{CDCl}_3$ )  $\delta$  -27.19.

$^1\text{H}\{^{11}\text{B}\}$  NMR (600 MHz,  $\text{CDCl}_3$ )  $\delta$  7.27 (dd,  $J = 7.6, 1.1$  Hz, 1H), 7.24 (d,  $J = 7.9$  Hz, 1H), 7.12 (td,  $J = 7.5, 0.8$  Hz, 1H), 7.01 (td,  $J = 7.7, 1.5$  Hz, 1H), 6.78 (s, 2H), 3.78 (s, 6H), 2.61 – 2.54 (m, 2H), 1.62 – 1.50 (m, 2H), 0.77 – 0.70 (m, 2H).

HRMS (ESI-TOF)  $m/z$ :  $[\text{M} + \text{Na}]^+$  cacl'd. for  $\text{C}_{13}\text{H}_{18}\text{BClN}_2\text{Na}$  271.1149; found: 271.1140.

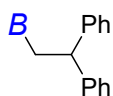

(1,3-dimethyl-1H-imidazol-3-ium-2-yl)(2,2-diphenylethyl)dihydroborate (**11k**): Colorless liquid (27 mg, 47% yield); Gradient eluent: EtOAc/petroleum ether: 1/5 to 1/3.

$^1\text{H NMR}$  (600 MHz,  $\text{CDCl}_3$ )  $\delta$  7.21 (d,  $J = 7.8$  Hz, 4H), 7.16 (t,  $J = 7.6$  Hz, 4H), 7.03 (t,  $J = 7.3$  Hz, 2H), 6.58 (s, 2H), 3.84 (t,  $J = 7.5$  Hz, 1H), 3.52 (s, 6H), 1.53 (dd,  $J = 94.9, 71.7$  Hz, 2H), 1.32 (s, 2H).

$^{13}\text{C NMR}$  (151 MHz,  $\text{CDCl}_3$ )  $\delta$  149.29, 127.81, 127.74, 124.91, 119.82, 54.34, 35.66.

$^{11}\text{B NMR}$  (193 MHz,  $\text{CDCl}_3$ )  $\delta$  -27.93 (t,  $J = 83.7$  Hz).

$^{11}\text{B}\{^1\text{H}\}$  NMR (193 MHz,  $\text{CDCl}_3$ )  $\delta$  -27.93.

$^1\text{H}\{^{11}\text{B}\}$  NMR (600 MHz,  $\text{CDCl}_3$ )  $\delta$  7.21 (d,  $J = 7.6$  Hz, 4H), 7.16 (t,  $J = 7.5$  Hz, 4H), 7.03 (t,  $J = 7.2$  Hz, 2H), 6.58 (s, 2H), 3.84 (t,  $J = 7.6$  Hz, 1H), 3.52 (s, 6H), 1.46 (s, 2H), 1.32 (dd,  $J = 11.6, 5.5$  Hz, 2H).

Characterization agrees with previous reports for this compound.<sup>1</sup>

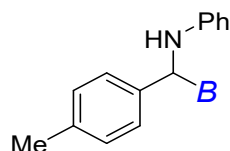

(1,3-dimethyl-1H-imidazol-3-ium-2-yl)((phenylamino)(p-tolyl)methyl)dihydroborate (**12a**): White solid (41 mg, 67% yield); Gradient eluent: EtOAc/petroleum ether: 1/3 to 1/2.

$^1\text{H NMR}$  (600 MHz,  $\text{CDCl}_3$ )  $\delta$  7.01 (t,  $J = 7.8$  Hz, 2H), 6.87 (d,  $J = 7.9$  Hz, 2H), 6.76 (d,  $J = 7.9$  Hz, 2H), 6.71 (s, 2H), 6.49 (t,  $J = 8.7$  Hz, 3H), 3.71 (s, 1H), 3.37 (s, 6H), 2.24 (s, 3H), 1.56 (dd,  $J = 176.0, 87.8$  Hz, 2H).

$^{13}\text{C NMR}$  (151 MHz,  $\text{CDCl}_3$ )  $\delta$  150.31, 148.81, 132.50, 128.77, 128.49, 124.46, 120.31, 114.97, 112.88, 35.57, 20.98.

$^{11}\text{B NMR}$  (193 MHz,  $\text{CDCl}_3$ )  $\delta$  -23.05 (t,  $J = 87.8$  Hz).

$^{11}\text{B}\{^1\text{H}\}$  NMR (193 MHz,  $\text{CDCl}_3$ )  $\delta$  -23.05.

$^1\text{H}\{^{11}\text{B}\}$  NMR (600 MHz,  $\text{CDCl}_3$ )  $\delta$  7.01 (t,  $J = 7.3$  Hz, 2H), 6.87 (d,  $J = 7.3$  Hz, 2H), 6.76 (d,  $J = 7.6$  Hz, 2H), 6.49 (t,  $J = 8.8$  Hz, 3H), 3.71 (s, 1H), 3.38 (s, 6H), 2.24 (s, 3H), 1.63 (dd,  $J = 91.7, 85.0$  Hz, 2H).

Characterization agrees with previous reports for this compound.<sup>6</sup>

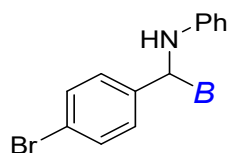

((4-bromophenyl)(phenylamino)methyl)(1,3-dimethyl-1H-imidazol-3-ium-2-yl)dihydroborate (**12b**): White solid (64 mg, 87% yield); Gradient eluent: EtOAc/petroleum ether: 1/3 to 1/1.

$^1\text{H NMR}$  (600 MHz,  $\text{CDCl}_3$ )  $\delta$  7.18 (d,  $J = 8.3$  Hz, 2H), 7.02 (t,  $J = 7.8$  Hz, 2H), 6.78 (d,  $J = 8.3$  Hz, 2H), 6.75 (s, 2H), 6.52 (t,  $J = 7.3$  Hz, 1H), 6.45 (d,  $J = 8.1$  Hz, 2H), 3.69 (s, 1H), 3.41 (s, 6H), 1.68 (dd,  $J = 187.8, 105.2$  Hz, 2H).

$^{13}\text{C NMR}$  (151 MHz,  $\text{CDCl}_3$ )  $\delta$  151.60, 149.88, 130.76, 128.84, 126.45, 120.51,

116.43, 115.41, 112.88, 35.67.

**<sup>11</sup>B NMR (193 MHz, CDCl<sub>3</sub>)** δ -23.04 (t, *J* = 88.5 Hz).

**<sup>11</sup>B{<sup>1</sup>H} NMR (193 MHz, CDCl<sub>3</sub>)** δ -23.04.

**<sup>1</sup>H{<sup>11</sup>B} NMR (600 MHz, CDCl<sub>3</sub>)** δ 7.18 (d, *J* = 8.3 Hz, 2H), 7.02 (t, *J* = 7.8 Hz, 2H), 6.78 (d, *J* = 8.2 Hz, 2H), 6.75 (s, 2H), 6.52 (t, *J* = 7.3 Hz, 1H), 6.45 (d, *J* = 8.0 Hz, 2H), 3.71 – 3.67 (m, 1H), 3.42 (s, 6H), 1.87 – 1.52 (m, 2H).

Characterization agrees with previous reports for this compound.<sup>6</sup>

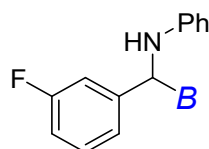

(1,3-dimethyl-1H-imidazol-3-ium-2-yl)((3-fluorophenyl) (phenylamino) methyl) dihydroborate (**12c**): White solid (50 mg, 81% yield); Gradient eluent: EtOAc/petroleum ether: 1/3 to 1/2.

**<sup>1</sup>H NMR (600 MHz, CDCl<sub>3</sub>)** δ 7.03 (dd, *J* = 8.3, 7.5 Hz, 2H), 7.01 – 6.98 (m, 1H), 6.74 (s, 2H), 6.69 – 6.62 (m, 2H), 6.60 (d, *J* = 7.7 Hz, 1H), 6.52 (t, *J* = 7.2 Hz, 1H), 6.48 (d, *J* = 7.7 Hz, 2H), 3.72 (s, 1H), 3.42 (s, 6H), 2.02 – 1.35 (m, 2H).

**<sup>13</sup>C NMR (151 MHz, CDCl<sub>3</sub>)** δ 163.28 (d, *J* = 244.6 Hz) 155.86 (d, *J* = 6.1 Hz), 149.97, 129.02 (d, *J* = 7.6 Hz), 128.84, 120.49, 120.03 (d, *J* = 1.5 Hz), 115.39, 112.86, 111.19 (d, *J* = 21.1 Hz), 110.19 (d, *J* = 22.7 Hz), 35.60.

**<sup>11</sup>B NMR (193 MHz, CDCl<sub>3</sub>)** δ -23.09 (d, *J* = 88.4 Hz).

**<sup>11</sup>B{<sup>1</sup>H} NMR (193 MHz, CDCl<sub>3</sub>)** δ -23.09.

**<sup>1</sup>H{<sup>11</sup>B} NMR (600 MHz, CDCl<sub>3</sub>)** δ 7.03 (dd, *J* = 8.4, 7.4 Hz, 2H), 7.01 – 6.98 (m, 1H), 6.74 (s, 2H), 6.69 – 6.62 (m, 2H), 6.61 (d, *J* = 7.6 Hz, 1H), 6.52 (t, *J* = 7.2 Hz, 1H), 6.48 (d, *J* = 7.7 Hz, 2H), 3.75 – 3.71 (m, 1H), 3.42 (s, 6H), 1.87 – 1.54 (m, 2H).

**<sup>19</sup>F NMR (565 MHz, CDCl<sub>3</sub>)** δ -114.84.

**HRMS (ESI-TOF)** *m/z*: [M + Na]<sup>+</sup> cacl. for C<sub>18</sub>H<sub>21</sub>BN<sub>3</sub>Na 332.1710; found: 332.1702.

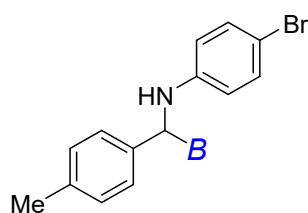

(((4-bromophenyl)amino)(p-tolyl)methyl)(1,3-dimethyl-1H-imidazol-3-ium-2-yl) dihydroborate (**12d**): White solid (58 mg, 76% yield); Gradient eluent: EtOAc/petroleum ether: 1/3 to 1/1.

**<sup>1</sup>H NMR (600 MHz, CDCl<sub>3</sub>)** δ 7.05 (d, *J* = 8.8 Hz, 2H), 6.86 (d, *J* = 7.9 Hz, 2H), 6.72 (s, 2H), 6.70 (d, *J* = 7.9 Hz, 2H), 6.35 (d, *J* = 8.8 Hz, 2H), 3.65 (s, 1H), 3.36 (s, 6H), 2.23 (s, 3H), 1.67 (dd, *J* = 186.3, 100.6 Hz, 2H).

**<sup>13</sup>C NMR (151 MHz, CDCl<sub>3</sub>)** δ 149.11, 148.06, 132.76, 131.34, 128.58, 124.39, 120.36, 114.46, 106.26, 35.57, 20.97.

$^{11}\text{B}$  NMR (193 MHz,  $\text{CDCl}_3$ )  $\delta$  -23.13 (t,  $J$  = 87.9 Hz).

$^{11}\text{B}\{^1\text{H}\}$  NMR (193 MHz,  $\text{CDCl}_3$ )  $\delta$  -23.13.

$^1\text{H}\{^{11}\text{B}\}$  NMR (600 MHz,  $\text{CDCl}_3$ )  $\delta$  7.05 (d,  $J$  = 8.7 Hz, 2H), 6.86 (d,  $J$  = 7.8 Hz, 2H), 6.72 (s, 2H), 6.70 (d,  $J$  = 7.6 Hz, 2H), 6.35 (d,  $J$  = 8.7 Hz, 2H), 3.67 – 3.63 (m, 1H), 3.36 (s, 6H), 2.23 (s, 3H), 1.85 – 1.50 (m, 2H).

Characterization agrees with previous reports for this compound.<sup>6</sup>

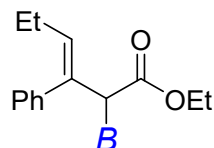

(*Z*)-(1,3-dimethyl-1H-imidazol-3-ium-2-yl)(1-ethoxy-1-oxo-3-phenylhex-3-en-2-yl)dihydroborate (**14**): Colorless liquid (16 mg, 50% yield); Gradient eluent: EtOAc/petroleum ether: 1/1 to 2/1.

$^1\text{H}$  NMR (600 MHz,  $\text{CDCl}_3$ )  $\delta$  7.22 (t,  $J$  = 7.6 Hz, 2H), 7.12 (t,  $J$  = 7.7 Hz, 3H), 6.78 (s, 2H), 5.90 (t,  $J$  = 7.3 Hz, 1H), 3.88 (q,  $J$  = 7.1 Hz, 2H), 3.69 (s, 6H), 2.89 (s, 1H), 2.02 – 1.94 (m, 2H), 1.79 – 1.56 (m, 2H), 1.03 (t,  $J$  = 7.1 Hz, 3H), 0.94 (t,  $J$  = 7.5 Hz, 3H).

$^{13}\text{C}$  NMR (151 MHz,  $\text{CDCl}_3$ )  $\delta$  180.02, 144.52, 141.04, 128.84, 128.60, 127.42, 125.51, 120.32, 58.88, 36.08, 22.83, 14.91, 14.34.

$^{11}\text{B}$  NMR (193 MHz,  $\text{CDCl}_3$ )  $\delta$  -25.25 (t,  $J$  = 89.8 Hz).

$^{11}\text{B}\{^1\text{H}\}$  NMR (193 MHz,  $\text{CDCl}_3$ )  $\delta$  -25.25.

$^1\text{H}\{^{11}\text{B}\}$  NMR (600 MHz,  $\text{CDCl}_3$ )  $\delta$  7.22 (t,  $J$  = 7.6 Hz, 2H), 7.12 (t,  $J$  = 7.1 Hz, 3H), 6.78 (s, 2H), 5.90 (t,  $J$  = 7.3 Hz, 1H), 3.88 (q,  $J$  = 7.1 Hz, 2H), 3.69 (s, 6H), 2.89 (t,  $J$  = 5.9 Hz, 1H), 2.01 – 1.93 (m, 2H), 1.82 – 1.74 (m, 2H), 1.03 (t,  $J$  = 7.1 Hz, 3H), 0.93 (t,  $J$  = 7.5 Hz, 3H).

Characterization agrees with previous reports for this compound.<sup>12</sup>

## 8. Characterization data of starting materials.

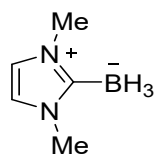

(1,3-dimethyl-1H-imidazol-3-ium-2-yl)trihydroborate: White solid (5.3 g, 48% yield).

$^1\text{H}$  NMR (600 MHz,  $\text{CDCl}_3$ )  $\delta$  6.79 (s, 2H), 3.71 (s, 6H), 0.99 (dd,  $J$  = 55.1, 27.9 Hz, 3H).

$^{13}\text{C}$  NMR (151 MHz,  $\text{CDCl}_3$ )  $\delta$  119.95, 35.94.  $^{11}\text{B}$  NMR (193 MHz,  $\text{CDCl}_3$ )  $\delta$  -37.49 (q,  $J$  = 85.95).

$^{11}\text{B}\{^1\text{H}\}$  NMR (193 MHz,  $\text{CDCl}_3$ )  $\delta$  -37.48.

$^1\text{H}\{^{11}\text{B}\}$  NMR (600 MHz,  $\text{CDCl}_3$ )  $\delta$  6.79 (s, 2H), 3.71 (s, 6H), 0.99 (dd,  $J$  = 55.1, 27.9 Hz, 3H).

Characterization agrees with previous reports for this compound.<sup>1</sup>

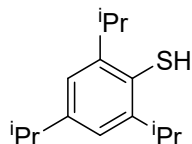

2,4,6-triisopropylbenzenethiol: Colorless liquid (3.8 g, 80% yield).

**<sup>1</sup>H NMR (600 MHz, CDCl<sub>3</sub>)** δ 7.03 (s, 2H), 3.58 – 3.50 (m, 2H), 3.10 (s, 1H), 2.90 (dq, *J* = 13.8, 6.9 Hz, 1H), 1.29 (dd, *J* = 11.1, 6.9 Hz, 19H).

**<sup>13</sup>C NMR (151 MHz, CDCl<sub>3</sub>)** δ 148.14, 147.12, 124.33, 121.36, 34.19, 31.84, 24.09, 23.28.

Characterization agrees with previous reports for this compound.<sup>2</sup>

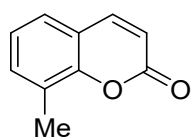

8-methyl-2H-chromen-2-one (**5-3**): White solid (800 mg, 50% yield); Gradient eluent: EtOAc/petroleum ether: 1/20 to 1/10.

**<sup>1</sup>H NMR (600 MHz, CDCl<sub>3</sub>)** δ 7.69 (d, *J* = 9.5 Hz, 1H), 7.38 (d, *J* = 7.4 Hz, 1H), 7.32 (d, *J* = 7.6 Hz, 1H), 7.17 (t, *J* = 7.6 Hz, 1H), 6.41 (d, *J* = 9.5 Hz, 1H), 2.46 (s, 3H).

**<sup>13</sup>C NMR (151 MHz, CDCl<sub>3</sub>)** δ 161.06, 152.41, 143.84, 133.18, 126.37, 125.59, 124.01, 118.58, 116.33, 15.42.

Characterization agrees with previous reports for this compound.<sup>7</sup>

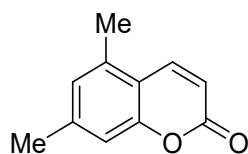

5,7-dimethyl-2H-chromen-2-one (**5-4**): White solid (835 mg, 48% yield); Gradient eluent: EtOAc/petroleum ether: 1/20 to 1/10.

**<sup>1</sup>H NMR (600 MHz, CDCl<sub>3</sub>)** δ 7.86 (d, *J* = 10.2 Hz, 1H), 6.97 (s, 1H), 6.92 (s, 1H), 6.35 (d, *J* = 9.7 Hz, 1H), 2.47 (s, 3H), 2.39 (s, 3H).

**<sup>13</sup>C NMR (151 MHz, CDCl<sub>3</sub>)** δ 161.15, 154.78, 142.76, 140.38, 135.67, 126.99, 115.34, 115.08, 114.74, 21.69, 18.20.

Characterization agrees with previous reports for this compound.<sup>7</sup>

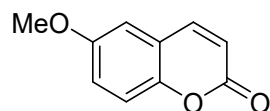

6-methoxy-2H-chromen-2-one (**5-7**): White solid (915 mg, 52% yield); Gradient eluent: EtOAc/petroleum ether: 1/20 to 1/10.

**<sup>1</sup>H NMR (600 MHz, CDCl<sub>3</sub>)** δ 7.66 (d, *J* = 9.5 Hz, 1H), 7.27 (d, *J* = 7.5 Hz, 1H), 7.11 (dd, *J* = 9.0, 2.5 Hz, 1H), 6.92 (s, 1H), 6.43 (d, *J* = 9.5 Hz, 1H), 3.85 (s, 3H).

**<sup>13</sup>C NMR (151 MHz, CDCl<sub>3</sub>)** δ 161.01, 156.10, 148.48, 143.21, 119.47, 119.18,



117.92, 117.1, 110.03, 55.86.

Characterization agrees with previous reports for this compound.<sup>8</sup>

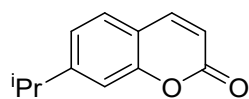

7-isopropyl-2H-chromen-2-one (**5-9**): White solid (564 mg, 30% yield); Gradient eluent: EtOAc/petroleum ether: 1/20 to 1/10.

**<sup>1</sup>H NMR (600 MHz, CDCl<sub>3</sub>)** δ 7.66 (d, *J* = 9.5 Hz, 1H), 7.38 (d, *J* = 7.9 Hz, 1H), 7.18 – 7.11 (m, 2H), 6.33 (d, *J* = 9.5 Hz, 1H), 2.97 (dt, *J* = 13.7, 6.8 Hz, 1H), 1.27 (s, 3H), 1.26 (s, 3H).

**<sup>13</sup>C NMR (151 MHz, CDCl<sub>3</sub>)** δ 161.16, 154.32, 154.04, 143.39, 127.70, 123.13, 116.79, 115.52, 114.49, 34.30, 23.65.

Characterization agrees with previous reports for this compound.<sup>7</sup>

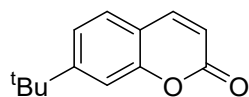

7-(tert-butyl)-2H-chromen-2-one (**5-10**): Yellow solid (707 mg, 35% yield); Gradient eluent: EtOAc/petroleum ether: 1/20 to 1/10.

**<sup>1</sup>H NMR (600 MHz, CDCl<sub>3</sub>)** δ 7.68 (d, *J* = 9.5 Hz, 1H), 7.41 (d, *J* = 8.1 Hz, 1H), 7.34 (d, *J* = 1.5 Hz, 1H), 7.32 (dd, *J* = 8.1, 1.7 Hz, 1H), 6.36 (d, *J* = 9.5 Hz, 1H), 1.35 (s, 9H).

**<sup>13</sup>C NMR (151 MHz, CDCl<sub>3</sub>)** δ 161.23, 156.41, 154.14, 143.23, 127.33, 121.98, 116.41, 115.74, 113.75, 35.30, 31.07.

Characterization agrees with previous reports for this compound.<sup>7</sup>

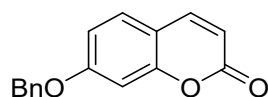

7-(benzyloxy)-2H-chromen-2-one (**5-12**): Yellow solid (1600 mg, 63% yield); Gradient eluent: EtOAc/petroleum ether: 1/20 to 1/10.

**<sup>1</sup>H NMR (600 MHz, CDCl<sub>3</sub>)** δ 7.62 (d, *J* = 9.5 Hz, 1H), 7.44 – 7.35 (m, 6H), 6.91 (dd, *J* = 8.6, 2.4 Hz, 1H), 6.87 (d, *J* = 2.3 Hz, 1H), 6.23 (d, *J* = 9.5 Hz, 1H), 5.11 (s, 2H).

**<sup>13</sup>C NMR (151 MHz, CDCl<sub>3</sub>)** δ 161.89, 161.21, 155.82, 143.43, 135.80, 128.85, 128.79, 128.41, 127.55, 126.98, 113.25, 112.76, 101.93, 70.53.

Characterization agrees with previous reports for this compound.<sup>7</sup>

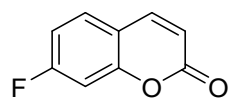

7-fluoro-2H-chromen-2-one (**5-13**): Yellow solid (705 mg, 43% yield); Gradient eluent: EtOAc/petroleum ether: 1/20 to 1/10.

**<sup>1</sup>H NMR (600 MHz, CDCl<sub>3</sub>)** δ 7.68 (d, *J* = 9.6 Hz, 1H), 7.47 (dd, *J* = 8.6, 6.0 Hz, 1H),

7.07 – 7.00 (m, 2H), 6.37 (d,  $J = 9.6$  Hz, 1H).

$^{13}\text{C}$  NMR (151 MHz,  $\text{CDCl}_3$ )  $\delta$  164.55 (d,  $J = 253.7$  Hz), 160.25, 155.29 (d,  $J = 12.1$  Hz), 142.86, 129.41 (d,  $J = 10.6$  Hz), 115.57 (d,  $J = 3.0$  Hz), 115.46 (d,  $J = 4.5$  Hz), 112.58 (d,  $J = 24.2$  Hz) 104.65 (d,  $J = 25.7$  Hz).

$^{19}\text{F}$  NMR (565 MHz,  $\text{CDCl}_3$ )  $\delta$  -104.97.

Characterization agrees with previous reports for this compound.<sup>8</sup>

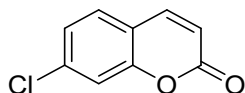

7-chloro-2H-chromen-2-one (**5-14**): Yellow solid (540 mg, 30% yield); Gradient eluent: EtOAc/petroleum ether: 1/20 to 1/10.

$^1\text{H}$  NMR (600 MHz,  $\text{CDCl}_3$ )  $\delta$  7.67 (d,  $J = 9.6$  Hz, 1H), 7.42 (d,  $J = 8.3$  Hz, 1H), 7.35 (d,  $J = 1.8$  Hz, 1H), 7.27 (d,  $J = 2.0$  Hz, 1H), 7.26 (s, 1H), 6.42 (d,  $J = 9.6$  Hz, 1H).

$^{13}\text{C}$  NMR (151 MHz,  $\text{CDCl}_3$ )  $\delta$  159.96, 154.38, 142.64, 137.85, 128.64, 125.06, 117.42, 117.29, 116.67.

Characterization agrees with previous reports for this compound.<sup>7</sup>

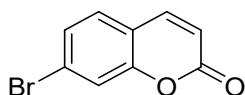

7-bromo-2H-chromen-2-one (**5-15**): Yellow solid (780 mg, 35% yield); Gradient eluent: EtOAc/petroleum ether: 1/20 to 1/10.

$^1\text{H}$  NMR (600 MHz,  $\text{CDCl}_3$ )  $\delta$  7.66 (d,  $J = 9.6$  Hz, 1H), 7.49 (d,  $J = 1.7$  Hz, 1H), 7.40 (dd,  $J = 8.2, 1.8$  Hz, 1H), 7.34 (d,  $J = 8.3$  Hz, 1H), 6.42 (d,  $J = 9.6$  Hz, 1H).

$^{13}\text{C}$  NMR (151 MHz,  $\text{CDCl}_3$ )  $\delta$  159.93, 154.28, 142.79, 128.81, 127.91, 125.82, 120.20, 117.76, 116.88.

Characterization agrees with previous reports for this compound.<sup>7</sup>

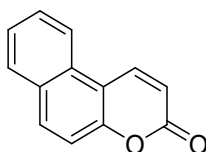

3H-benzo[f]chromen-3-one (**5-16**): Yellow solid (784 mg, 40% yield); Gradient eluent: EtOAc/petroleum ether: 1/20 to 1/10.

$^1\text{H}$  NMR (600 MHz,  $\text{CDCl}_3$ )  $\delta$  8.49 (d,  $J = 9.7$  Hz, 1H), 8.22 (d,  $J = 8.4$  Hz, 1H), 7.98 (d,  $J = 9.0$  Hz, 1H), 7.91 (d,  $J = 8.1$  Hz, 1H), 7.69 (t,  $J = 7.7$  Hz, 1H), 7.57 (t,  $J = 7.5$  Hz, 1H), 7.46 (d,  $J = 9.0$  Hz, 1H), 6.58 (d,  $J = 9.7$  Hz, 1H).

$^{13}\text{C}$  NMR (151 MHz,  $\text{CDCl}_3$ )  $\delta$  160.93, 153.91, 139.11, 133.15, 130.30, 129.04, 128.31, 126.08, 121.37, 117.10, 115.68, 113.01.

Characterization agrees with previous reports for this compound.<sup>7</sup>

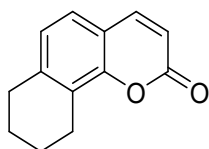

7,8,9,10-tetrahydro-2H-benzo[h]chromen-2-one (**5-17**): Yellow solid (700 mg, 35% yield); Gradient eluent: EtOAc/petroleum ether: 1/20 to 1/10.

**<sup>1</sup>H NMR (600 MHz, CDCl<sub>3</sub>)** δ 7.64 (d, *J* = 9.4 Hz, 1H), 7.19 (d, *J* = 7.9 Hz, 1H), 6.99 (d, *J* = 7.9 Hz, 1H), 6.32 (d, *J* = 9.5 Hz, 1H), 2.89 (s, 2H), 2.83 (t, *J* = 5.4 Hz, 2H), 1.86 – 1.79 (m, 4H).

**<sup>13</sup>C NMR (151 MHz, CDCl<sub>3</sub>)** δ 161.40, 152.20, 143.95, 142.49, 125.51, 125.29, 124.38, 116.12, 114.93, 29.94, 22.51, 22.46, 22.07.

Characterization agrees with previous reports for this compound.<sup>7</sup>

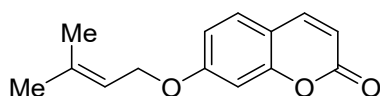

7-((3-methylbut-2-en-1-yl)oxy)-2H-chromen-2-one (**5-18**): White solid (1600 mg, 70% yield); Gradient eluent: EtOAc/petroleum ether: 1/3 to 1/2.

**<sup>1</sup>H NMR (600 MHz, CDCl<sub>3</sub>)** δ 7.62 (d, *J* = 9.5 Hz, 1H), 7.35 (d, *J* = 8.6 Hz, 1H), 6.84 (dd, *J* = 8.6, 2.2 Hz, 1H), 6.81 (s, 1H), 6.23 (d, *J* = 9.4 Hz, 1H), 5.46 (t, *J* = 6.7 Hz, 1H), 4.57 (d, *J* = 6.7 Hz, 2H), 1.80 (s, 3H), 1.76 (s, 3H).

**<sup>13</sup>C NMR (151 MHz, CDCl<sub>3</sub>)** δ 162.14, 161.30, 155.88, 143.47, 139.30, 128.71, 118.64, 113.22, 112.97, 112.44, 101.57, 65.44, 25.83, 18.30.

Characterization agrees with previous reports for this compound.<sup>7</sup>

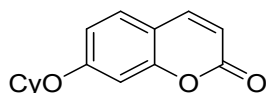

7-(cyclohexyloxy)-2H-chromen-2-one (**5-19**): White solid (854 mg, 35% yield); Gradient eluent: EtOAc/petroleum ether: 1/3 to 1/2.

**<sup>1</sup>H NMR (600 MHz, DMSO)** δ 7.98 (d, *J* = 9.5 Hz, 1H), 7.60 (d, *J* = 8.6 Hz, 1H), 6.99 (d, *J* = 2.3 Hz, 1H), 6.94 (dd, *J* = 8.6, 2.4 Hz, 1H), 6.27 (d, *J* = 9.5 Hz, 1H), 4.50 (td, *J* = 8.5, 3.9 Hz, 1H), 1.98 – 1.92 (m, 2H), 1.71 (dd, *J* = 8.9, 4.1 Hz, 2H), 1.58 – 1.51 (m, 1H), 1.49 – 1.37 (m, 4H), 1.27 (tt, *J* = 16.2, 8.3 Hz, 1H).

**<sup>13</sup>C NMR (151 MHz, DMSO)** δ 161.10, 160.82, 155.96, 144.80, 130.02, 113.91, 112.75, 112.60, 102.52, 75.52, 31.55, 25.46, 23.54.

Characterization agrees with previous reports for this compound.<sup>7</sup>

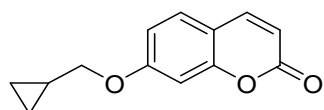

7-(cyclopropylmethoxy)-2H-chromen-2-one (**5-20**): Colorless liquid (1663 mg, 77% yield); Gradient eluent: EtOAc/petroleum ether: 1/3 to 1/2.

**<sup>1</sup>H NMR (600 MHz, CDCl<sub>3</sub>)** δ 7.61 (d, *J* = 9.5 Hz, 1H), 7.35 (d, *J* = 8.6 Hz, 1H), 6.83

(dd,  $J = 8.6, 2.4$  Hz, 1H), 6.77 (d,  $J = 2.3$  Hz, 1H), 6.22 (d,  $J = 9.4$  Hz, 1H), 3.84 (d,  $J = 7.0$  Hz, 2H), 1.28 (tt,  $J = 10.2, 5.1$  Hz, 1H), 0.68 – 0.64 (m, 2H), 0.37 (q,  $J = 4.9$  Hz, 2H).

$^{13}\text{C}$  NMR (151 MHz,  $\text{CDCl}_3$ )  $\delta$  162.26, 161.28, 155.89, 143.47, 128.75, 113.00, 122.97, 112.44, 101.43, 73.34, 9.99, 3.31.

Characterization agrees with previous reports for this compound.<sup>7</sup>

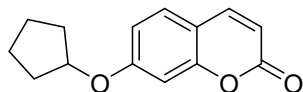

7-(cyclopentyloxy)-2H-chromen-2-one (**5-21**): Colorless liquid (1725 mg, 75% yield); Gradient eluent: EtOAc/petroleum ether: 1/3 to 1/2.

$^1\text{H}$  NMR (600 MHz,  $\text{CDCl}_3$ )  $\delta$  7.61 (d,  $J = 9.4$  Hz, 1H), 7.33 (d,  $J = 8.4$  Hz, 1H), 6.80 – 6.74 (m, 2H), 6.20 (d,  $J = 9.4$  Hz, 1H), 4.79 – 4.75 (m, 1H), 1.93 (dt,  $J = 12.3, 6.3$  Hz, 2H), 1.88 – 1.82 (m, 2H), 1.81 – 1.74 (m, 2H), 1.67 – 1.59 (m, 2H).

$^{13}\text{C}$  NMR (151 MHz,  $\text{CDCl}_3$ )  $\delta$  161.52, 161.36, 155.86, 143.53, 128.69, 113.79, 112.70, 112.13, 102.25, 80.21, 32.80, 24.07.

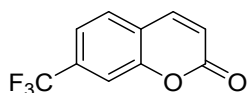

7-(trifluoromethyl)-2H-chromen-2-one (**5-27**): Colorless liquid (50 mg, 23% yield); Gradient eluent: EtOAc/petroleum ether: 1/10 to 1/5.

$^1\text{H}$  NMR (600 MHz,  $\text{CDCl}_3$ )  $\delta$  7.75 (d,  $J = 9.6$  Hz, 1H), 7.62 (d,  $J = 8.0$  Hz, 1H), 7.56 (s, 1H), 7.52 (d,  $J = 8.1$  Hz, 1H), 6.53 (d,  $J = 9.6$  Hz, 1H).

$^{13}\text{C}$  NMR (151 MHz,  $\text{CDCl}_3$ )  $\delta$  159.60, 153.69, 142.25, 133.47 (q,  $J = 33.2$  Hz), 128.65, 123.15 (q,  $J = 91.1$  Hz), 121.36, 121.04 (q,  $J = 3.5$  Hz), 118.97, 114.32 (q,  $J = 4.0$  Hz).

$^{19}\text{F}$  NMR (565 MHz,  $\text{CDCl}_3$ )  $\delta$  -62.92.

Characterization agrees with previous reports for this compound.<sup>15</sup>

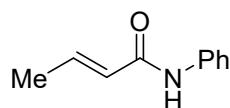

(*E*)-N-phenylbut-2-enamide (**11-3**): White solid (362 mg, 75% yield); Gradient eluent: EtOAc/petroleum ether: 1/5 to 1/4.

$^1\text{H}$  NMR (600 MHz,  $\text{CDCl}_3$ )  $\delta$  8.12 (s, 1H), 7.59 (d,  $J = 7.3$  Hz, 2H), 7.28 (t,  $J = 7.9$  Hz, 2H), 7.08 (t,  $J = 7.3$  Hz, 1H), 6.95 (dq,  $J = 13.8, 6.9$  Hz, 1H), 6.02 (dd,  $J = 15.1, 1.6$  Hz, 1H), 1.83 (dd,  $J = 6.9, 1.6$  Hz, 3H).

$^{13}\text{C}$  NMR (151 MHz,  $\text{CDCl}_3$ )  $\delta$  164.59, 141.34, 138.23, 128.92, 125.66, 124.23, 120.26, 17.82.

Characterization agrees with previous reports for this compound.<sup>9</sup>

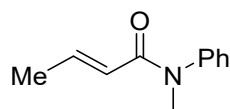

(*E*)-*N*-methyl-*N*-phenylbut-2-enamide (**11-4**): Colorless liquid (315 mg, 60% yield); Gradient eluent: EtOAc/petroleum ether: 1/5 to 1/4.

<sup>1</sup>H NMR (600 MHz, CDCl<sub>3</sub>) δ 7.37 (t, *J* = 7.7 Hz, 2H), 7.29 (t, *J* = 7.4 Hz, 1H), 7.13 (d, *J* = 7.3 Hz, 2H), 6.88 (dq, *J* = 13.8, 6.9 Hz, 1H), 5.71 (d, *J* = 15.0 Hz, 1H), 3.29 (s, 3H), 1.68 (dd, *J* = 6.9, 1.5 Hz, 3H).

<sup>13</sup>C NMR (151 MHz, CDCl<sub>3</sub>) δ 166.15, 143.72, 141.15, 129.52, 127.42, 127.34, 122.72, 37.35, 17.92.

Characterization agrees with previous reports for this compound.<sup>10</sup>

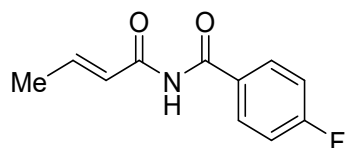

(*E*)-*N*-(but-2-enoyl)-4-fluorobenzamide (**11-5**): White solid (267 mg, 64% yield); Gradient eluent: EtOAc/petroleum ether: 1/3 to 1/2.

<sup>1</sup>H NMR (600 MHz, CDCl<sub>3</sub>) δ 8.80 (s, 1H), 7.95 – 7.90 (m, 2H), 7.24 – 7.16 (m, 3H), 7.13 (dd, *J* = 15.3, 1.5 Hz, 1H), 1.99 (dd, *J* = 6.8, 1.5 Hz, 3H).

<sup>13</sup>C NMR (151 MHz, CDCl<sub>3</sub>) δ 167.47, 165.74 (d, *J* = 255.2 Hz), 164.83, 147.4, 130.46 (d, *J* = 9.1 Hz), 129.22 (d, *J* = 3.0 Hz), 124.07, 116.14 (d, *J* = 22.7 Hz), 18.61. <sup>19</sup>F NMR (565 MHz, CDCl<sub>3</sub>) δ -104.88.

Characterization agrees with previous reports for this compound.<sup>6</sup>

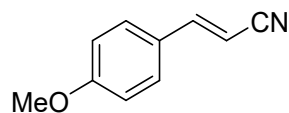

(*E*)-3-(4-methoxyphenyl)acrylonitrile (**9-2**): Colorless liquid (127 mg, 40% yield); Gradient eluent: EtOAc/petroleum ether: 1/3 to 1/2.

<sup>1</sup>H NMR (600 MHz, CDCl<sub>3</sub>) δ 7.38 (d, *J* = 8.7 Hz, 2H), 7.30 (d, *J* = 16.6 Hz, 1H), 6.90 (d, *J* = 8.8 Hz, 2H), 5.70 (d, *J* = 16.6 Hz, 1H), 3.83 (s, 3H).

<sup>13</sup>C NMR (151 MHz, CDCl<sub>3</sub>) δ 162.08, 150.05, 129.13, 126.36, 118.77, 114.55, 93.34, 55.48.

Characterization agrees with previous reports for this compound.<sup>11</sup>

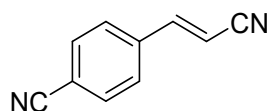

(*E*)-4-(2-cyanovinyl)benzonitrile (**9-3**): White solid (93 mg, 30% yield); Gradient eluent: EtOAc/petroleum ether: 1/3 to 1/2.

<sup>1</sup>H NMR (600 MHz, CDCl<sub>3</sub>) δ 7.71 (d, *J* = 8.3 Hz, 2H), 7.56 (d, *J* = 8.3 Hz, 2H), 7.41 (d, *J* = 16.7 Hz, 1H), 6.01 (d, *J* = 16.7 Hz, 1H).

<sup>13</sup>C NMR (151 MHz, CDCl<sub>3</sub>) δ 148.26, 137.47, 132.89, 127.82, 117.98, 117.13,

114.46, 100.33.

Characterization agrees with previous reports for this compound.<sup>11</sup>

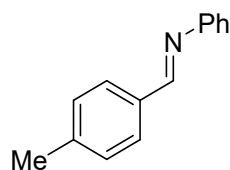

(*E*)-*N*-phenyl-1-(*p*-tolyl)methanimine (**12-1**): White solid (585 mg, 30% yield).

<sup>1</sup>H NMR (400 MHz, CDCl<sub>3</sub>) δ 8.43 (s, 1H), 7.80 (d, *J* = 8.1 Hz, 2H), 7.42 – 7.36 (m, 2H), 7.29 (d, *J* = 7.9 Hz, 2H), 7.25 – 7.19 (m, 3H), 2.43 (s, 3H).

<sup>13</sup>C NMR (101 MHz, CDCl<sub>3</sub>) δ 160.40, 152.28, 141.89, 133.69, 129.53, 129.13, 128.83, 125.76, 120.89, 21.65.

Characterization agrees with previous reports for this compound.<sup>6</sup>

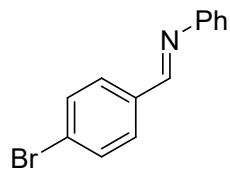

(*E*)-1-(4-bromophenyl)-*N*-phenylmethanimine (**12-2**): White solid (1032 mg, 40% yield).

<sup>1</sup>H NMR (400 MHz, CDCl<sub>3</sub>) δ 8.40 (s, 1H), 7.80 – 7.74 (m, 2H), 7.62 – 7.57 (m, 2H), 7.39 (t, *J* = 7.7 Hz, 2H), 7.25 (dd, *J* = 6.5, 1.7 Hz, 1H), 7.21 (dd, *J* = 7.4, 1.0 Hz, 2H).

<sup>13</sup>C NMR (101 MHz, CDCl<sub>3</sub>) δ 158.94, 151.68, 135.14, 132.06, 130.17, 129.23, 126.26, 125.91, 120.87.

Characterization agrees with previous reports for this compound.<sup>6</sup>

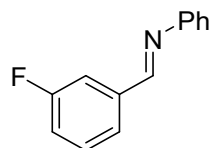

(*E*)-1-(3-fluorophenyl)-*N*-phenylmethanimine (**12-3**): White solid (756 mg, 38% yield).

<sup>1</sup>H NMR (400 MHz, CDCl<sub>3</sub>) δ 8.43 (d, *J* = 1.2 Hz, 1H), 7.69 – 7.65 (m, 1H), 7.63 (d, *J* = 7.7 Hz, 1H), 7.47 – 7.37 (m, 3H), 7.27 – 7.15 (m, 4H).

<sup>13</sup>C NMR (101 MHz, CDCl<sub>3</sub>) δ 163.14 (d, *J* = 248.5 Hz), 158.86 (d, *J* = 3.0 Hz), 151.54, 138.55 (d, *J* = 7.1 Hz), 130.32 (d, *J* = 8.1 Hz), 129.23, 126.34, 125.01 (d, *J* = 3.0 Hz), 120.89, 118.33 (d, *J* = 22.2 Hz), 114.70 (d, *J* = 22.2 Hz).

<sup>19</sup>F NMR (565 MHz, CDCl<sub>3</sub>) δ -112.52.

HRMS (ESI-TOF) *m/z*: [M + H]<sup>+</sup> cacl. for C<sub>13</sub>H<sub>11</sub>FN 200.0870; found: 200.0872.

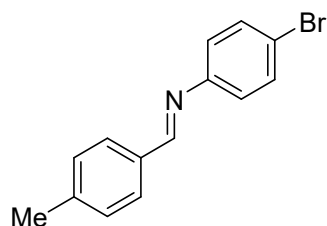

(*E*)-*N*-(4-bromophenyl)-1-(*p*-tolyl)methanimine (**12-4**): White solid (819 mg, 30% yield).

$^1\text{H NMR}$  (600 MHz,  $\text{CDCl}_3$ )  $\delta$  8.39 (s, 1H), 7.78 (d,  $J = 8.0$  Hz, 2H), 7.50 (d,  $J = 8.5$  Hz, 2H), 7.28 (d,  $J = 7.9$  Hz, 2H), 7.08 (d,  $J = 8.5$  Hz, 2H), 2.42 (s, 3H).

$^{13}\text{C NMR}$  (151 MHz,  $\text{CDCl}_3$ )  $\delta$  160.74, 151.23, 142.24, 133.42, 132.17, 129.60, 128.92, 122.62, 119.10, 21.68.

Characterization agrees with previous reports for this compound.<sup>6</sup>

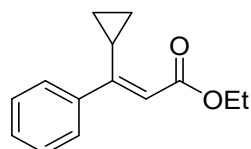

Ethyl (*E*)-3-cyclopropyl-3-phenylacrylate (**13**): Colorless liquid (22 mg, 10% yield).

$^1\text{H NMR}$  (600 MHz,  $\text{CDCl}_3$ )  $\delta$  7.32 – 7.28 (m, 3H), 7.16 – 7.11 (m, 2H), 5.79 (s, 1H), 4.22 (q,  $J = 7.1$  Hz, 2H), 3.17 – 3.08 (m, 1H), 1.31 (t,  $J = 7.1$  Hz, 3H), 0.91 – 0.86 (m, 2H), 0.50 – 0.43 (m, 2H).

$^{13}\text{C NMR}$  (151 MHz,  $\text{CDCl}_3$ )  $\delta$  166.95, 163.18, 138.85, 128.04, 127.76, 127.73, 118.79, 59.78, 14.36, 13.51, 6.91.

## 9. The crystallographic data

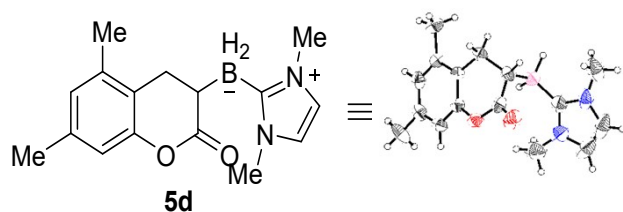

Figure S12. The single-crystal structure of **5d**

Table S2

|                   |                                                   |
|-------------------|---------------------------------------------------|
| Empirical formula | $\text{C}_{16}\text{H}_{21}\text{BN}_2\text{O}_2$ |
| Formula weight    | 284.16                                            |
| Temperature/K     | 293(2)                                            |
| Crystal system    | Triclinic                                         |
| Space group       | P-1                                               |
| $a/\text{\AA}$    | 9.0836(6)                                         |
| $b/\text{\AA}$    | 9.1558(8)                                         |
| $c/\text{\AA}$    | 11.0863(8)                                        |

|                                                |                                                               |
|------------------------------------------------|---------------------------------------------------------------|
| $\alpha/^\circ$                                | 114.228(8)                                                    |
| $\beta/^\circ$                                 | 106.840(6)                                                    |
| $\gamma/^\circ$                                | 93.503(6)                                                     |
| Volume/ $\text{\AA}^3$                         | 787.46(12)                                                    |
| Z                                              | 2                                                             |
| $\rho_{\text{calc}}/\text{g}/\text{cm}^3$      | 1.198                                                         |
| $\mu/\text{mm}^{-1}$                           | 0.622                                                         |
| F(000)                                         | 304.0                                                         |
| Crystal size/ $\text{mm}^3$                    | $0.05 \times 0.02 \times 0.02$                                |
| Radiation                                      | Cu K $\alpha$ ( $\lambda = 1.54184$ )                         |
| Index ranges                                   | $-10 \leq h \leq 11, -11 \leq k \leq 11, -13 \leq l \leq 13$  |
| 2 $\Theta$ range for data collection/ $^\circ$ | 9.324 to 143.132                                              |
| Reflections collected                          | 5210                                                          |
| Independent reflections                        | 2990 [ $R_{\text{int}} = 0.0219, R_{\text{sigma}} = 0.0332$ ] |
| Data/restraints/parameters                     | 2990/0/202                                                    |
| Goodness-of-fit on $F^2$                       | 1.058                                                         |
| Final R indexes [ $I \geq 2\sigma(I)$ ][a]     | $R_1 = 0.0514, wR_2 = 0.1436$                                 |
| Final R indexes [all data]                     | $R_1 = 0.0670, wR_2 = 0.1538$                                 |
| Largest diff. peak/hole / $e \text{\AA}^{-3}$  | 0.19/-0.19                                                    |

$$[a]R_1 = \frac{\sum ||F_o| - |F_c||}{\sum |F_o|}; wR_2 = \left\{ \frac{\sum [w(F_o^2 - F_c^2)^2]}{\sum [w(F_o^2)^2]} \right\}^{1/2}$$

Table S3

| Bond Lengths |     |          | Bond Angles |     |     |            |
|--------------|-----|----------|-------------|-----|-----|------------|
| C7           | C6  | 1.504(2) | C9          | C8  | C7  | 113.11(17) |
| C8           | C7  | 1.533(3) | C7          | C8  | B11 | 109.51(17) |
| C9           | C8  | 1.466(3) | C9          | C8  | B11 | 108.62(16) |
| C8           | B11 | 1.675(3) | C6          | C7  | C8  | 110.97(15) |
| C12          | B11 | 1.601(3) | C12         | B11 | C8  | 111.82(17) |

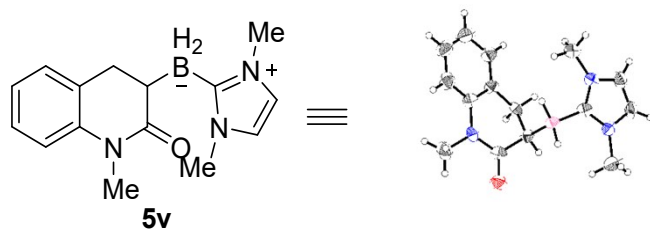

Figure S13. The single-crystal structure of **5v**

Table S4

|                   |                                                 |
|-------------------|-------------------------------------------------|
| Empirical formula | $\text{C}_{15}\text{H}_{20}\text{BN}_3\text{O}$ |
| Formula weight    | 269.15                                          |
| Temperature/K     | 293(2)                                          |
| Crystal system    | orthorhombic                                    |



|                                             |                                                               |
|---------------------------------------------|---------------------------------------------------------------|
| Space group                                 | P2 <sub>1</sub> 2 <sub>1</sub> 2 <sub>1</sub>                 |
| a/Å                                         | 6.2427(5)                                                     |
| b/Å                                         | 7.8871(6)                                                     |
| c/Å                                         | 29.178(2)                                                     |
| α/°                                         | 90                                                            |
| β/°                                         | 90                                                            |
| γ/°                                         | 90                                                            |
| Volume/Å <sup>3</sup>                       | 1436.64(19)                                                   |
| Z                                           | 4                                                             |
| ρ <sub>calc</sub> /g/cm <sup>3</sup>        | 1.244                                                         |
| μ/mm <sup>-1</sup>                          | 0.620                                                         |
| F(000)                                      | 576.0                                                         |
| Crystal size/mm <sup>3</sup>                | 0.01 × 0.01 × 0.01                                            |
| Radiation                                   | Cu Kα (λ = 1.54184)                                           |
| 2θ range for data collection/°              | 11.622 to 143.074                                             |
| Index ranges                                | -7 ≤ h ≤ 4, -9 ≤ k ≤ 8, -31 ≤ l ≤ 35                          |
| Reflections collected                       | 3502                                                          |
| Independent reflections                     | 2428 [R <sub>int</sub> = 0.0312, R <sub>sigma</sub> = 0.0526] |
| Data/restraints/parameters                  | 2428/0/192                                                    |
| Goodness-of-fit on F <sup>2</sup>           | 1.096                                                         |
| Final R indexes [I ≥ 2σ (I)] <sup>[a]</sup> | R <sub>1</sub> = 0.0452, wR <sub>2</sub> = 0.1025             |
| Final R indexes [all data]                  | R <sub>1</sub> = 0.0650, wR <sub>2</sub> = 0.1264             |
| Largest diff. peak/hole / e Å <sup>-3</sup> | 0.21/-0.25                                                    |
| Flack parameter                             | 0.5                                                           |

[a]  $R_1 = \frac{\sum ||F_o| - |F_c||}{\sum |F_o|}$ ;  $wR_2 = \left\{ \frac{\sum [w(F_o - F_c)^2]}{\sum [w(F_o)^2]} \right\}^{1/2}$

Table S5

| Bond Lengths |     |          | Bond Angles |     |     |          |
|--------------|-----|----------|-------------|-----|-----|----------|
| C4           | C3  | 1.506(5) | C4          | C3  | C2  | 110.6(3) |
| C3           | C2  | 1.540(5) | C1          | C2  | C3  | 110.8(4) |
| C2           | C1  | 1.488(6) | C3          | C2  | B11 | 113.4(3) |
| C2           | B11 | 1.671(7) | C1          | C2  | B11 | 111.3(3) |
| C12          | B11 | 1.612(7) | C12         | B11 | C2  | 106.9(4) |

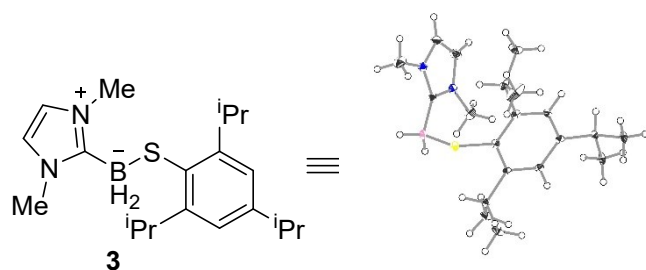

Figure S14. The single-crystal structure of **3**

Table S6

|                                             |                                                               |
|---------------------------------------------|---------------------------------------------------------------|
| Empirical formula                           | C <sub>20</sub> H <sub>33</sub> BN <sub>2</sub> S             |
| Formula weight                              | 344.35                                                        |
| Temperature/K                               | 100.01(10)                                                    |
| Crystal system                              | Monoclinic                                                    |
| Space group                                 | P2 <sub>1</sub> /n                                            |
| a/Å                                         | 7.8039(2)                                                     |
| b/Å                                         | 17.1774(4)                                                    |
| c/Å                                         | 14.8916(3)                                                    |
| α/°                                         | 90                                                            |
| β/°                                         | 91.570(2)                                                     |
| γ/°                                         | 90                                                            |
| Volume/Å <sup>3</sup>                       | 1995.48(8)                                                    |
| Z                                           | 4                                                             |
| ρ <sub>calc</sub> /g/cm <sup>3</sup>        | 1.146                                                         |
| μ/mm <sup>-1</sup>                          | 1.439                                                         |
| F(000)                                      | 752.0                                                         |
| Crystal size/mm <sup>3</sup>                | 0.01 × 0.01 × 0.01                                            |
| Radiation                                   | Cu Kα (λ = 1.54184)                                           |
| 2θ range for data collection/°              | 7.86 to 142.88                                                |
| Index ranges                                | -9 ≤ h ≤ 5, -20 ≤ k ≤ 20, -18 ≤ l ≤ 17                        |
| Reflections collected                       | 9265                                                          |
| Independent reflections                     | 3794 [R <sub>int</sub> = 0.0324, R <sub>sigma</sub> = 0.0320] |
| Data/restraints/parameters                  | 3794/0/225                                                    |
| Goodness-of-fit on F <sup>2</sup>           | 1.135                                                         |
| Final R indexes [I ≥ 2σ (I)] <sup>[a]</sup> | R <sub>1</sub> = 0.0505, wR <sub>2</sub> = 0.1330             |
| Final R indexes [all data]                  | R <sub>1</sub> = 0.0532, wR <sub>2</sub> = 0.1347             |
| Largest diff. peak/hole / e Å <sup>-3</sup> | 0.51/-0.46                                                    |

$$[a]R_1 = \frac{\sum ||F_o| - |F_c||}{\sum |F_o|}; wR_2 = \left\{ \frac{\sum [w(F_o^2 - F_c^2)^2]}{\sum [w(F_o^2)^2]} \right\}^{1/2}$$

Table S7

| Bond Lengths |    |          | Bond Angles |    |    |            |
|--------------|----|----------|-------------|----|----|------------|
| C9           | B8 | 1.606(3) | C9          | B8 | S7 | 109.23(14) |
| S7           | B8 | 1.947(2) | C1          | S7 | B8 | 102.53(9)  |
| S7           | C1 | 1.791(2) | C2          | C1 | S7 | 119.36(15) |
|              |    |          | C6          | C1 | S7 | 120.70(15) |

## 10. References:

1. P.-J. Xia, D. Song, Z.-P. Ye, Y.-Z. Hu, J.-A. Xiao, H.-Y. Xiang, X.-Q. Chen and H. Yang, *Angew. Chem. Int. Ed.*, 2020, **59**, 6706-6710.
2. D. C. Miller, J. M. Ganley, A. J. Musacchio, T. C. Sherwood, W. R. Ewing and R. R. Knowles, *J. Am. Chem. Soc.*, 2019, **141**, 16590-16594.
3. S.-C. Ren, F.-L. Zhang, A.-Q. Xu, Y. Yang, M. Zheng, X. Zhou, Y. Fu and Y.-F. Wang, *Nat. Commun.*, 2019, **10**, 1934.
4. G. Li, G. Huang, R. Sun and D. P. Curran, W. Dai, *Org. Lett.*, 2021, **23**, 4353-4357.
5. C. Zhu, J. Dong, X. Liu, L. Gao, Y. Zhao, J. Xie, S. Li and C. Zhu, *Angew. Chem. Int. Ed.*, 2020, **59**, 12817-12821.
6. N. Zhou, X.-A. Yuan, Y. Zhao, J. Xie and C. Zhu, *Angew. Chem. Int. Ed.*, 2018, **57**, 3990-3994.
7. X. Chen, L. Li, C. Pei, J. Li, D. Zou, Y. Wu and Y. Wu, *J. Org. Chem.* 2020, **86**, 2772-2783.
8. A. Cervi, Y. Vo, C. L. L. Chai, M. G. Banwell, P. Lan and A. C. Willis, *J. Org. Chem.* 2021, **86**, 178-198.
9. F. Wang, H. Yang, H. Fu and Z. Pei, *Chem. Commun.*, 2013, **49**, 517-519.
10. A. Khalafi-Nezhad, A. Parhami, M. N. S. Rad and A. Zarea, *Tetrahedron Letters.*, 2005, **46**, 6879-6882.
11. J. B. Metternich, D. G. Artiukhin, M. C. Holland, M. V. Bremen-Kühne, J. Neugebauer and R. Gilmour, *J. Org. Chem.*, 2017, **82**, 9955-9977.
12. J. Qi, F.-L. Zhang, J.-K. Jin, Q. Zhao, B. Li, L.-X. Liu and Y.-F. Wang, *Angew. Chem. Int. Ed.*, 2020, **59**, 12876-12884.
13. H. Li, H. Chen, Y. Zhou, J. Huang, J. Yi, H. Zhao, W. Wang and L. Jing, *Chem. Asian J.*, 2020, **15**, 555.
14. X. Pan, J. Lalevée, E. Lacôte and D. P. Curran, *Adv. Synth. Catal.*, 2013, **355**, 3522-3526.
15. B. Zhao, B. Xu, *Org. Biomol. Chem.*, 2021, **19**, 568-573.

# 11. NMR Spectra

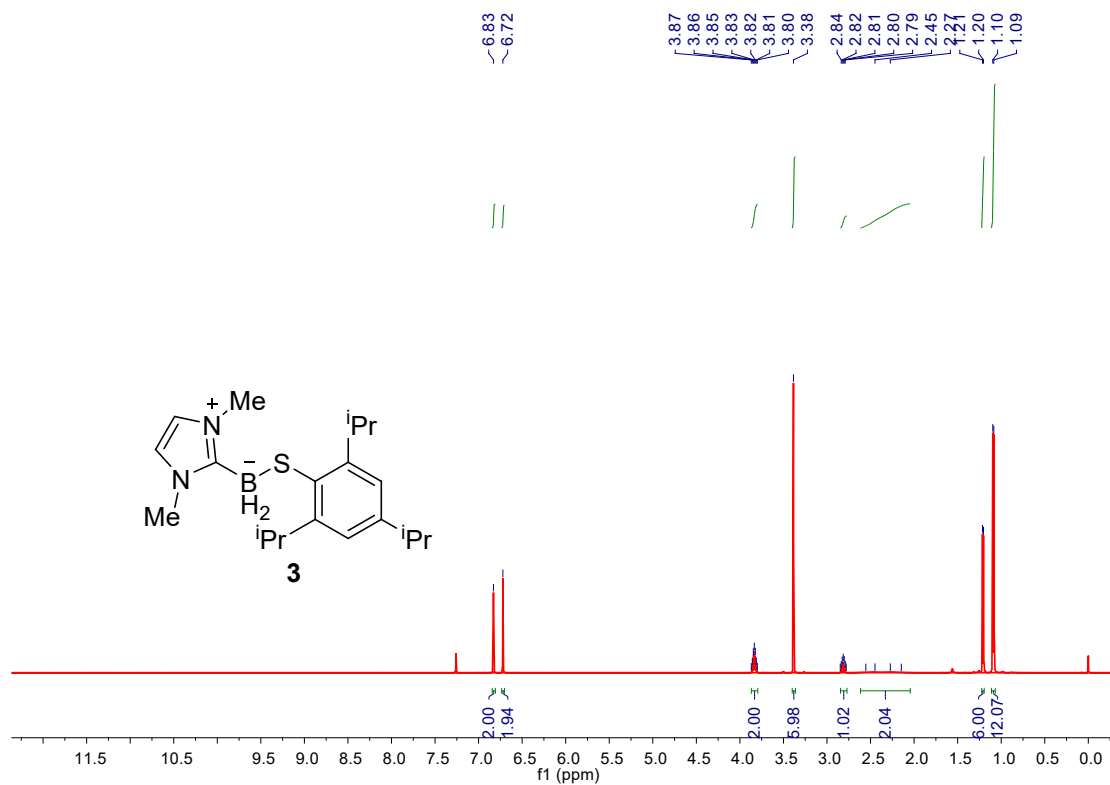

**<sup>1</sup>H NMR (600 MHz, CDCl<sub>3</sub>)**

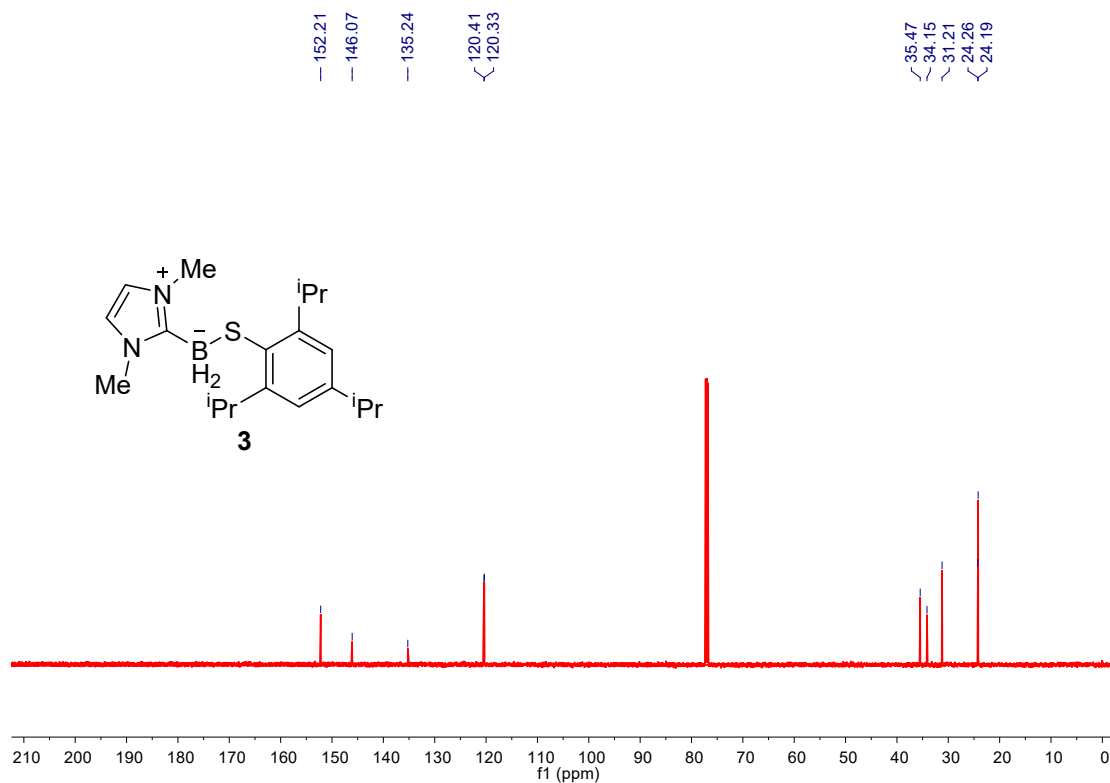

**<sup>13</sup>C NMR (151 MHz, CDCl<sub>3</sub>)**

-22.73  
-23.23  
-23.74

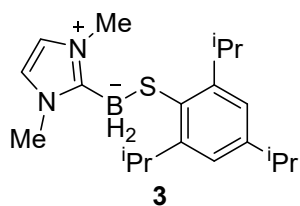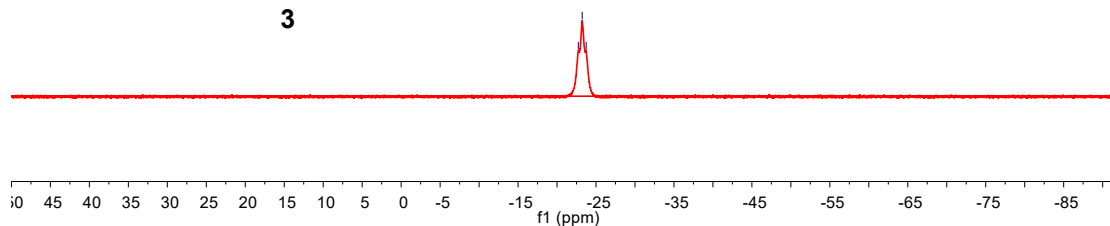

$^{11}\text{B}$  NMR (193 MHz,  $\text{CDCl}_3$ )

-23.31

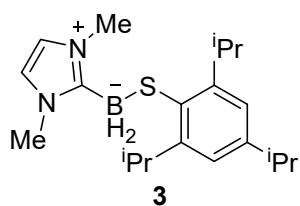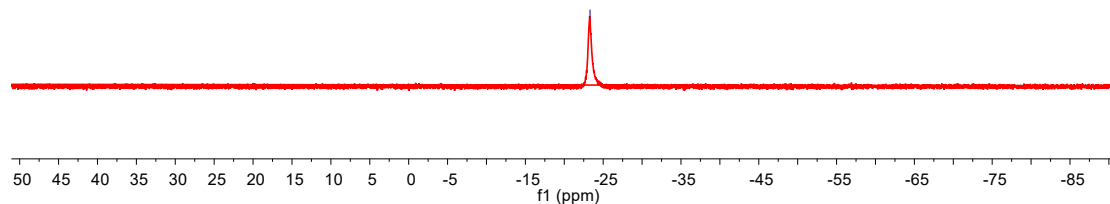

$^{11}\text{B}\{^1\text{H}\}$  NMR (193 MHz,  $\text{CDCl}_3$ )

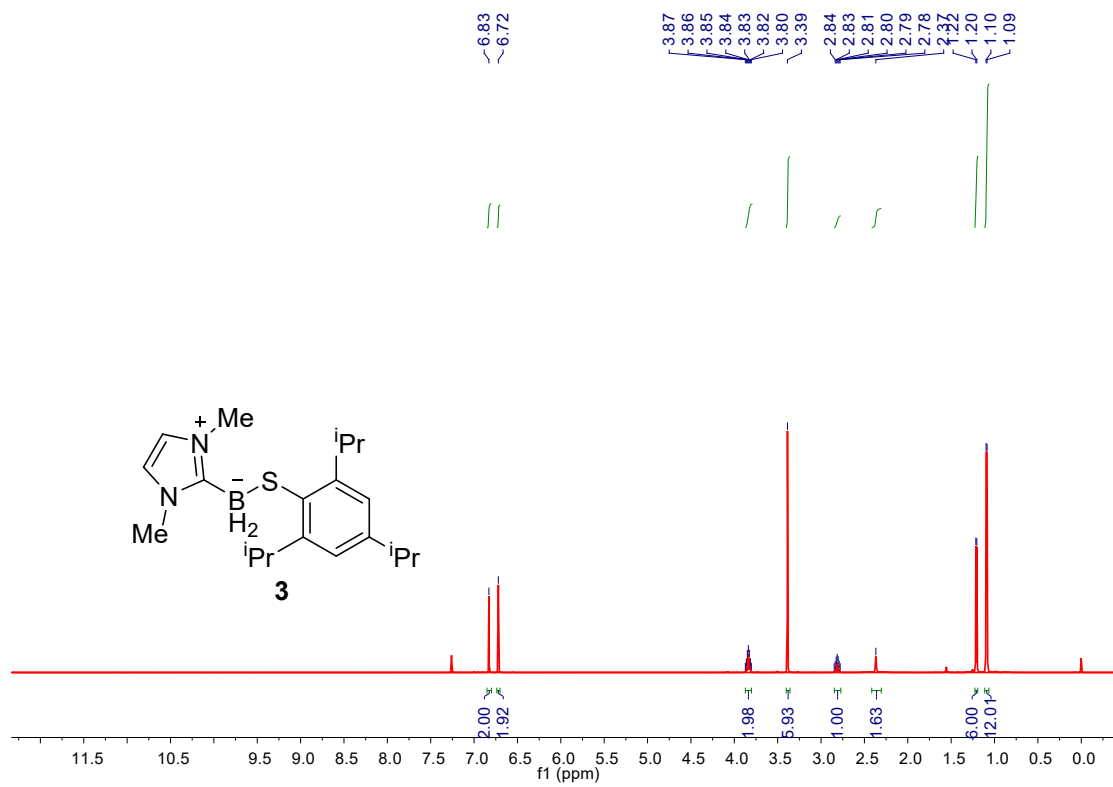

$^1\text{H}\{^{11}\text{B}\}$  NMR (600 MHz,  $\text{CDCl}_3$ )

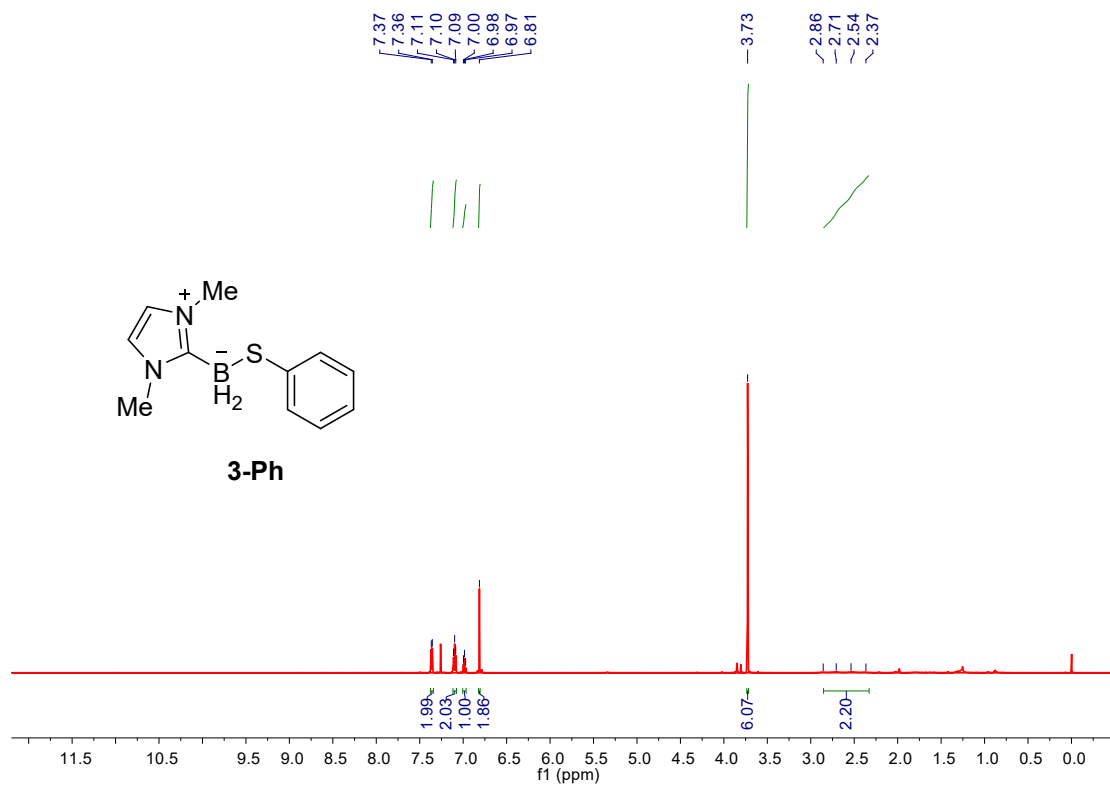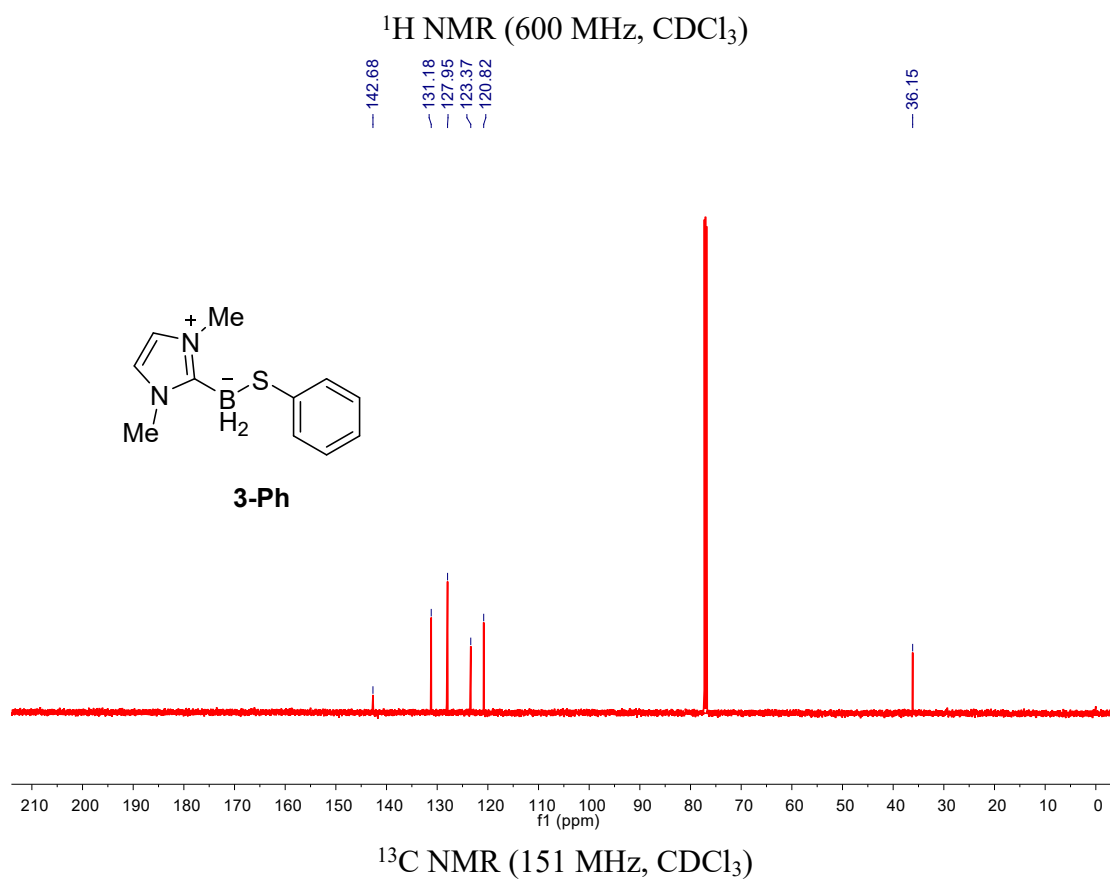

-23.86  
-24.38  
-24.91

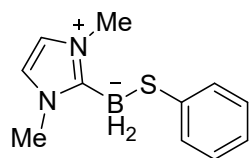

**3-Ph**

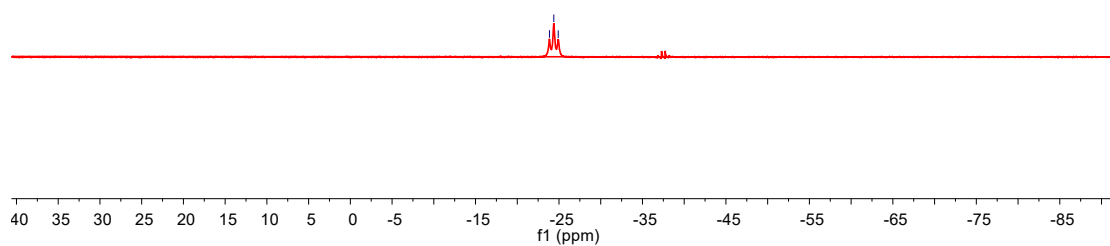

$^{11}\text{B}$  NMR (193 MHz,  $\text{CDCl}_3$ )

-24.38

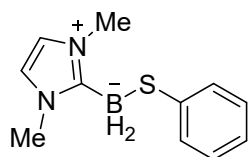

**3-Ph**

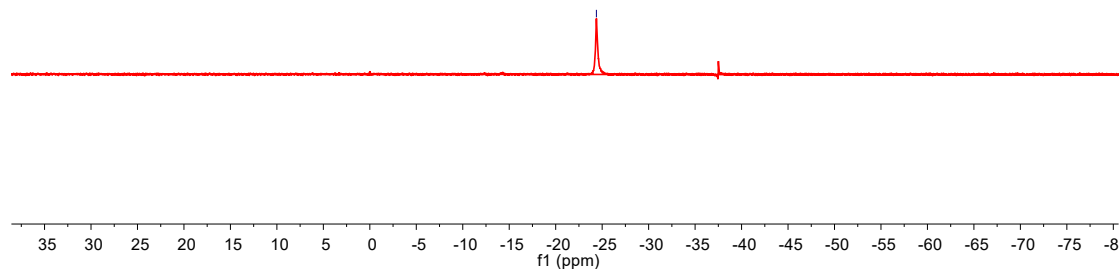

$^{11}\text{B}\{^1\text{H}\}$  NMR (193 MHz,  $\text{CDCl}_3$ )



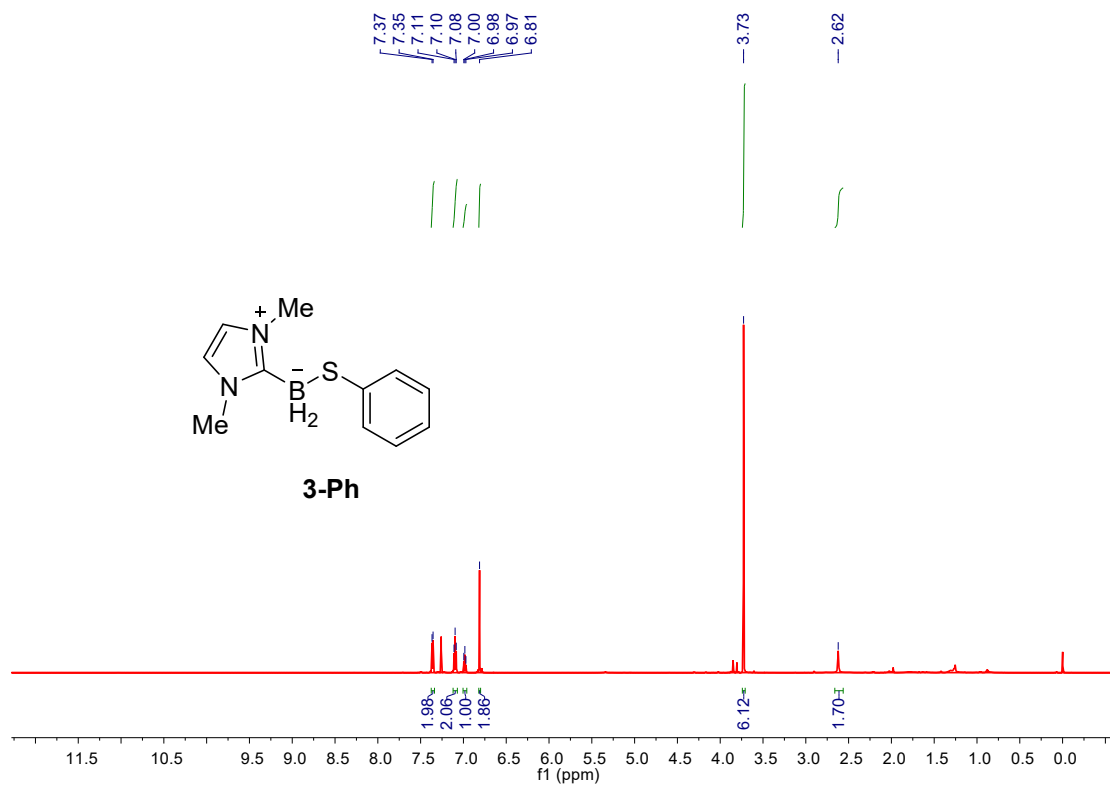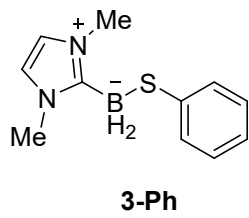

$^1\text{H}\{^{11}\text{B}\}$  NMR (600 MHz,  $\text{CDCl}_3$ )

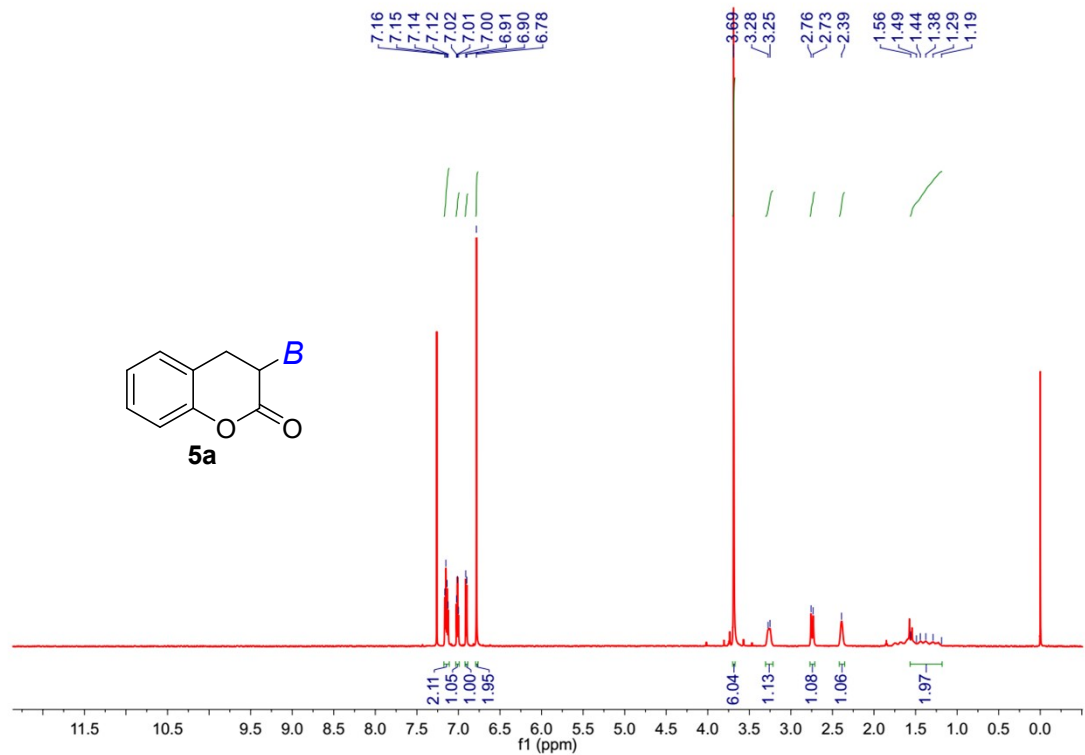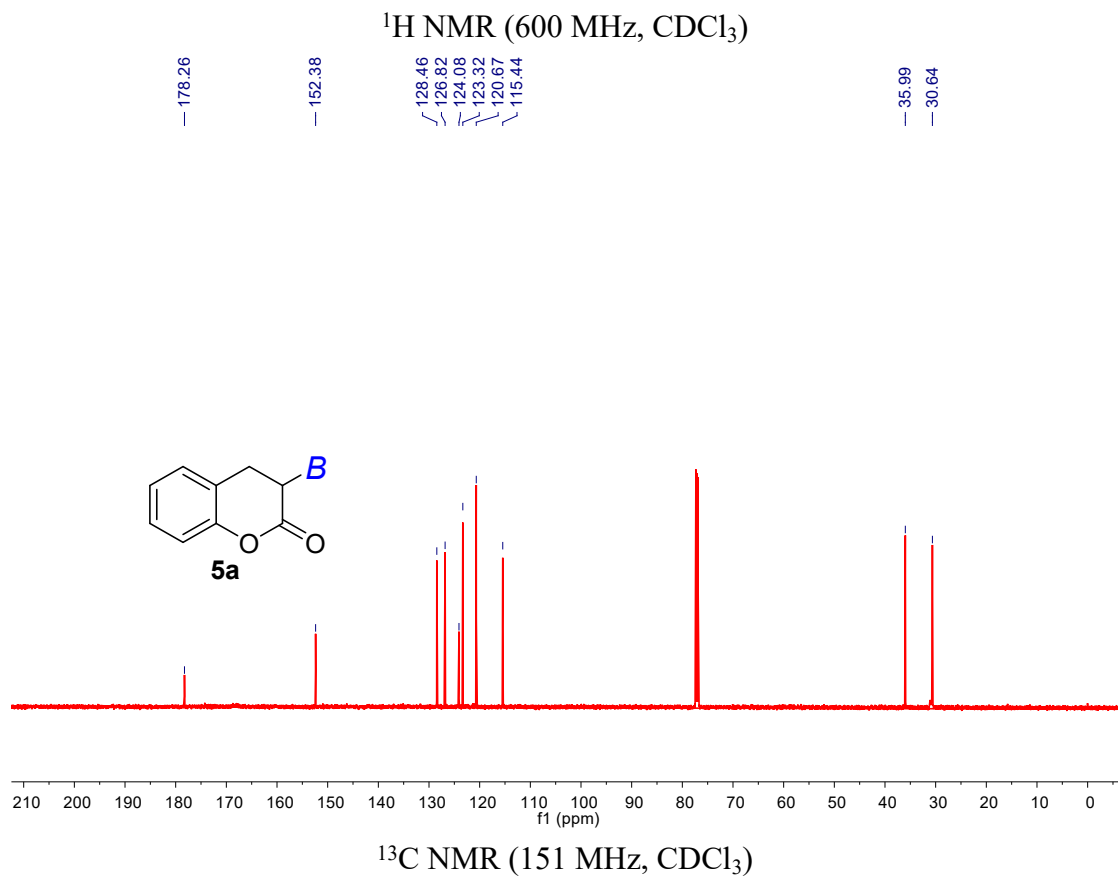

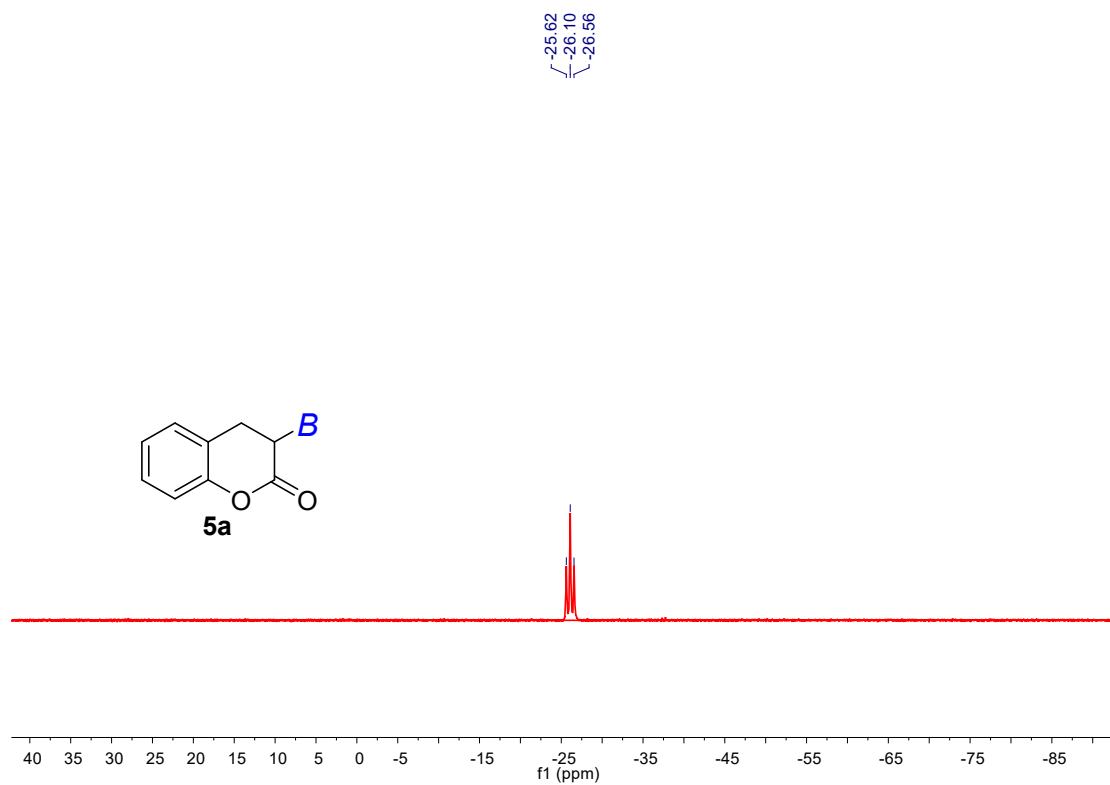

$^{11}\text{B}$  NMR (193 MHz,  $\text{CDCl}_3$ )

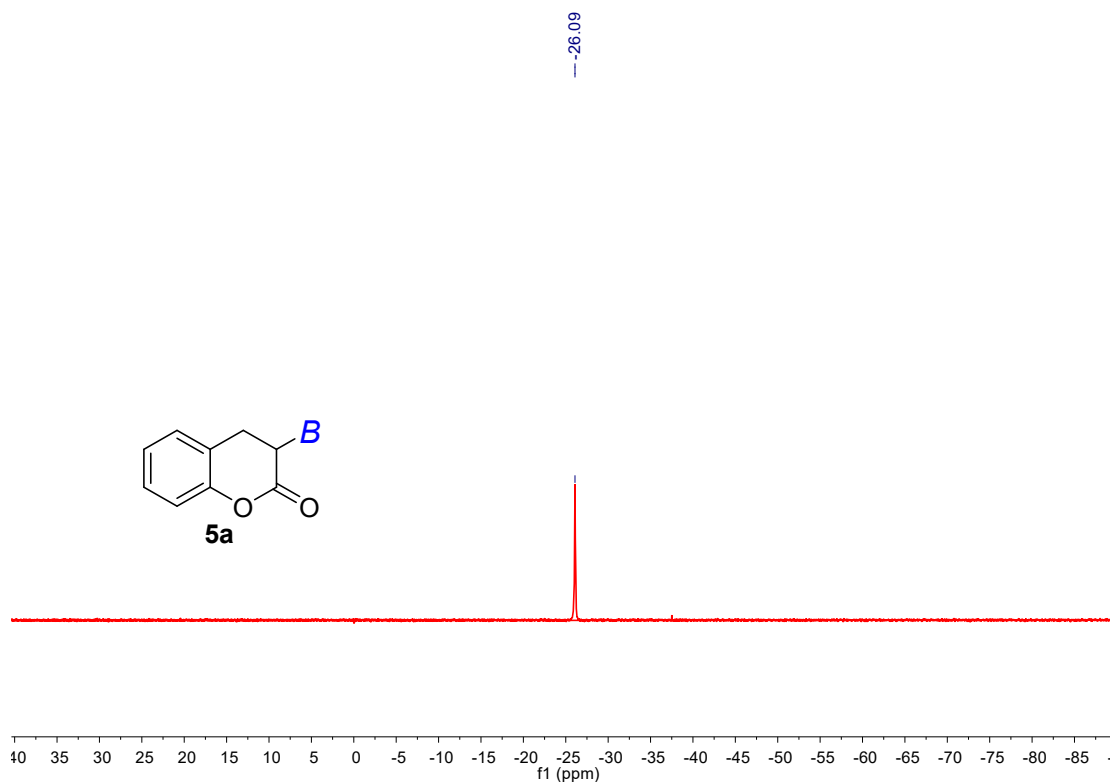

$^{11}\text{B}\{^1\text{H}\}$  NMR (193 MHz,  $\text{CDCl}_3$ )

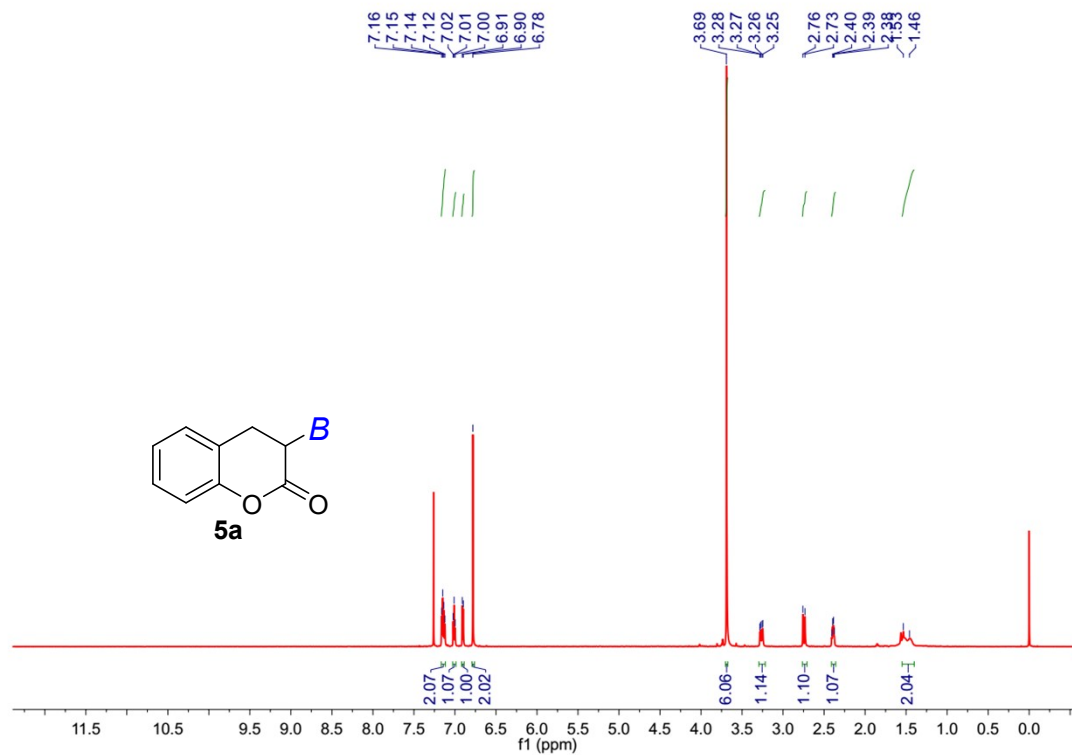

$^1\text{H}\{^{11}\text{B}\}$  NMR (600 MHz,  $\text{CDCl}_3$ )

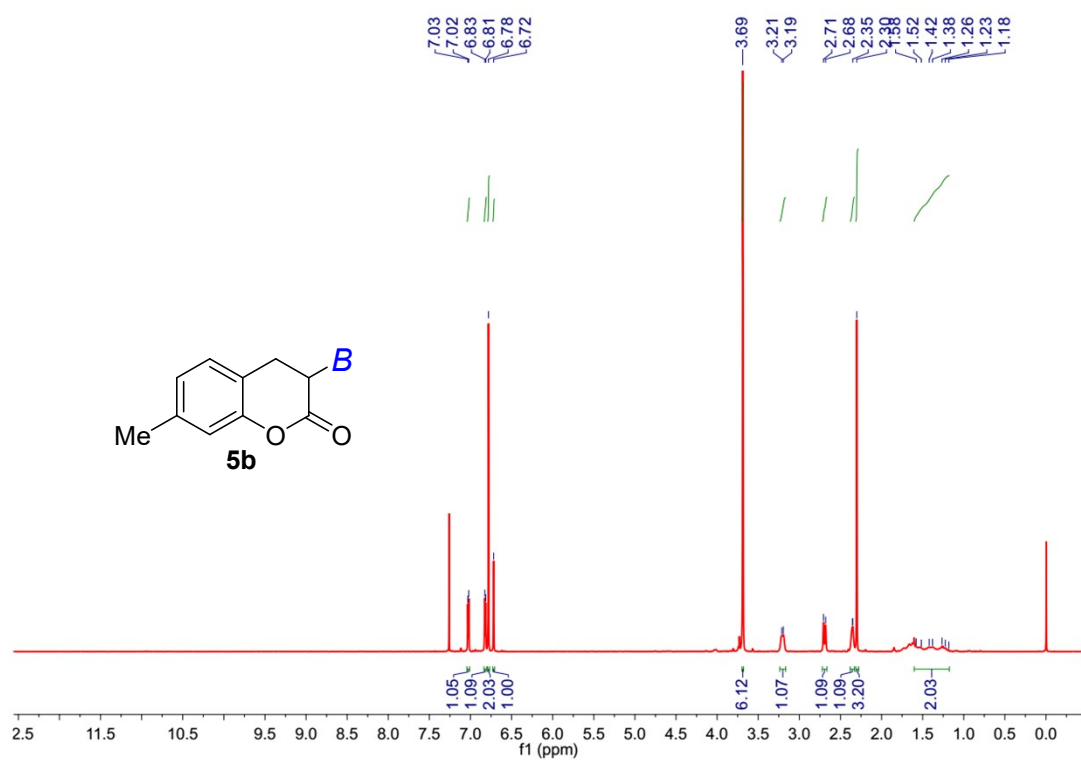

<sup>1</sup>H NMR (600 MHz, CDCl<sub>3</sub>)

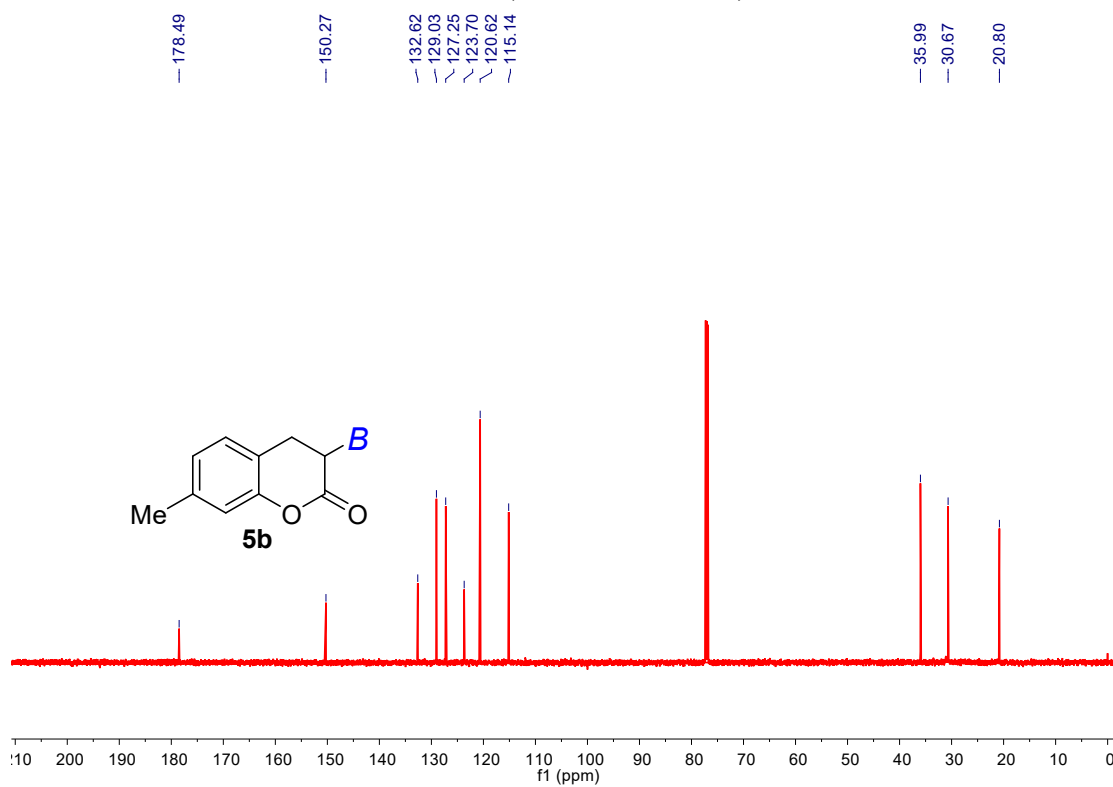

<sup>13</sup>C NMR (151 MHz, CDCl<sub>3</sub>)

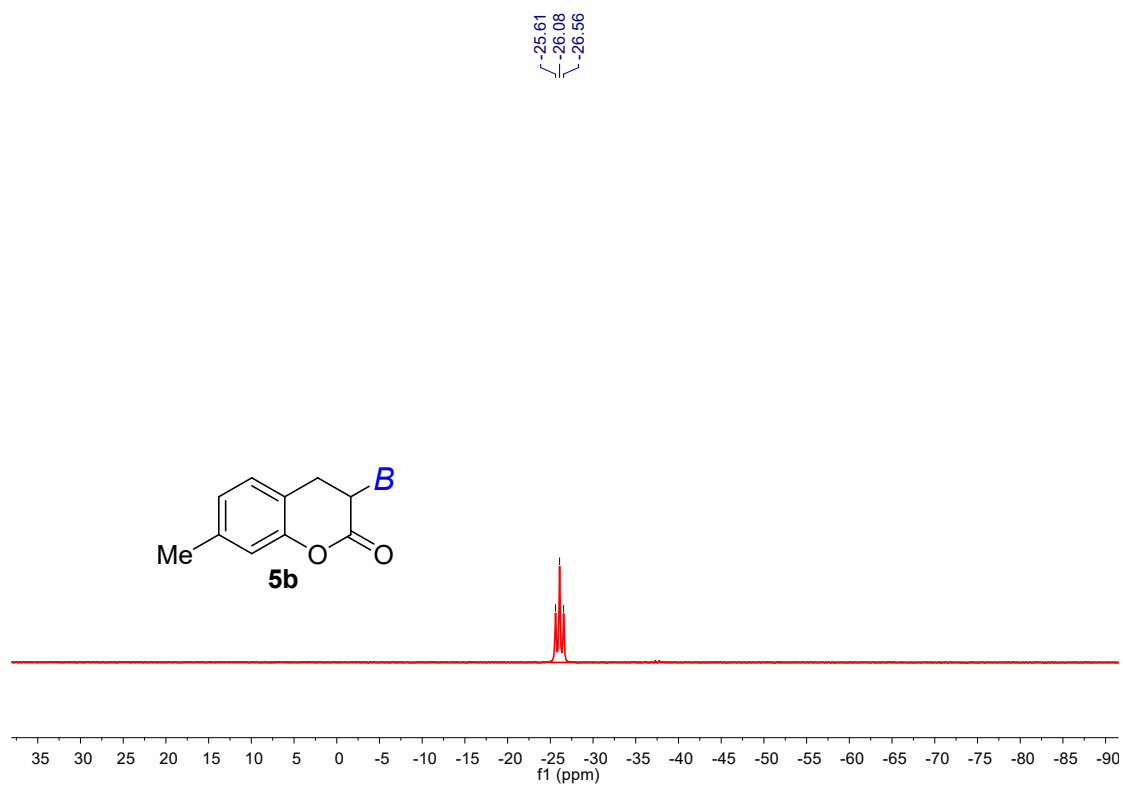

$^{11}\text{B}$  NMR (193 MHz,  $\text{CDCl}_3$ )

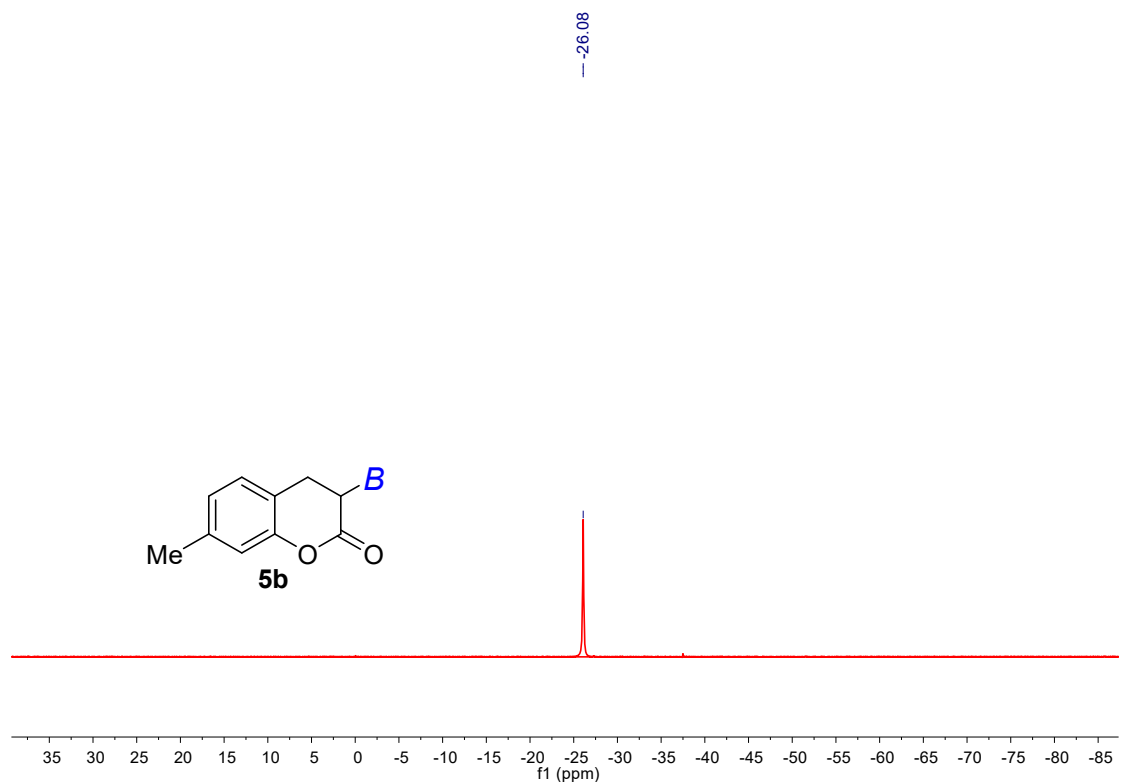

$^{11}\text{B}\{^1\text{H}\}$  NMR (193 MHz,  $\text{CDCl}_3$ )

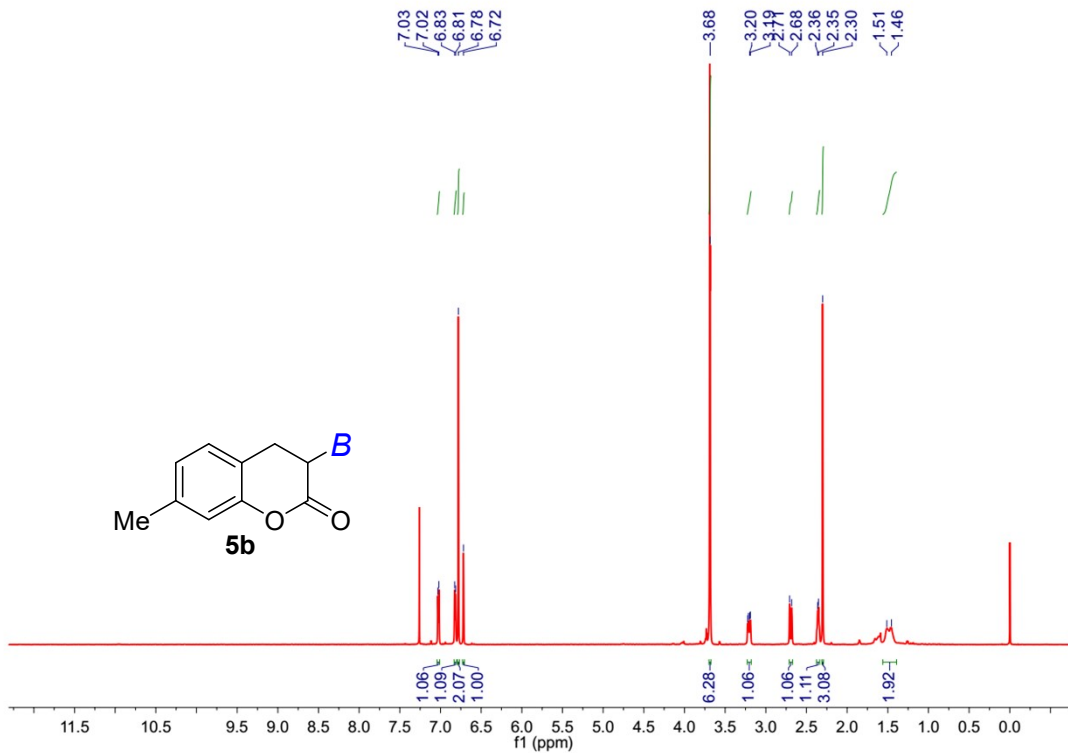

$^1\text{H}\{^{11}\text{B}\}$  NMR (600 MHz,  $\text{CDCl}_3$ )

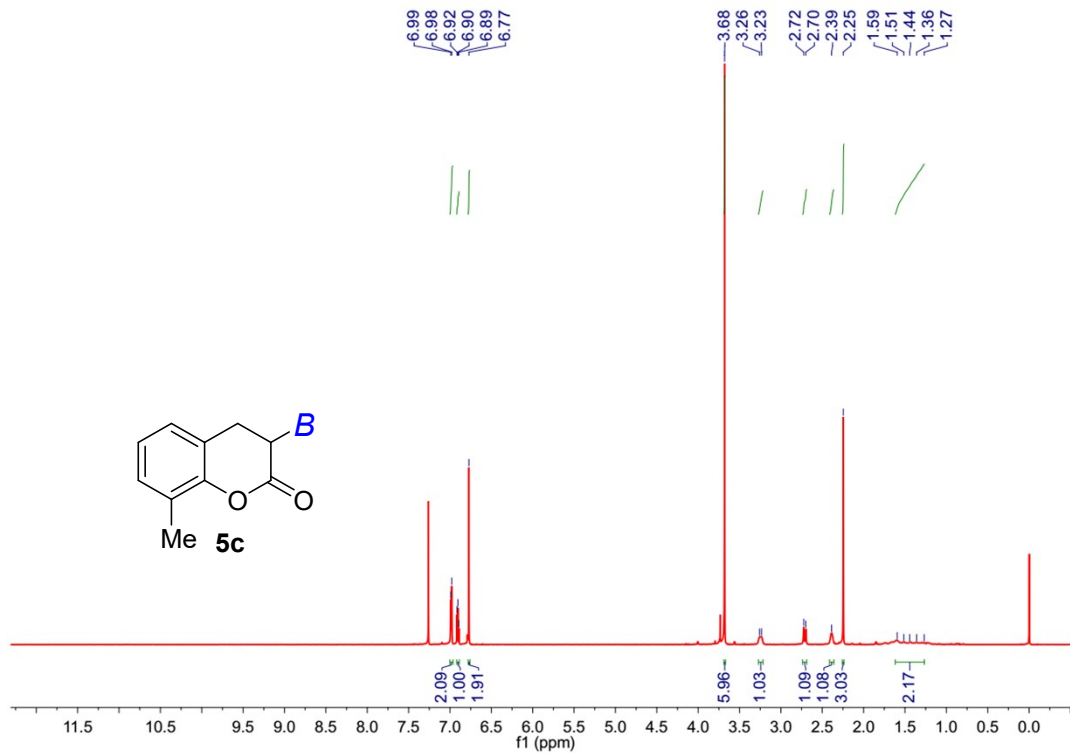

<sup>1</sup>H NMR (600 MHz, CDCl<sub>3</sub>)

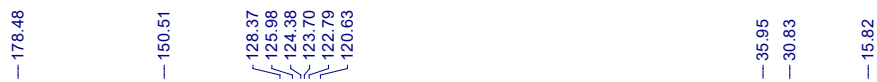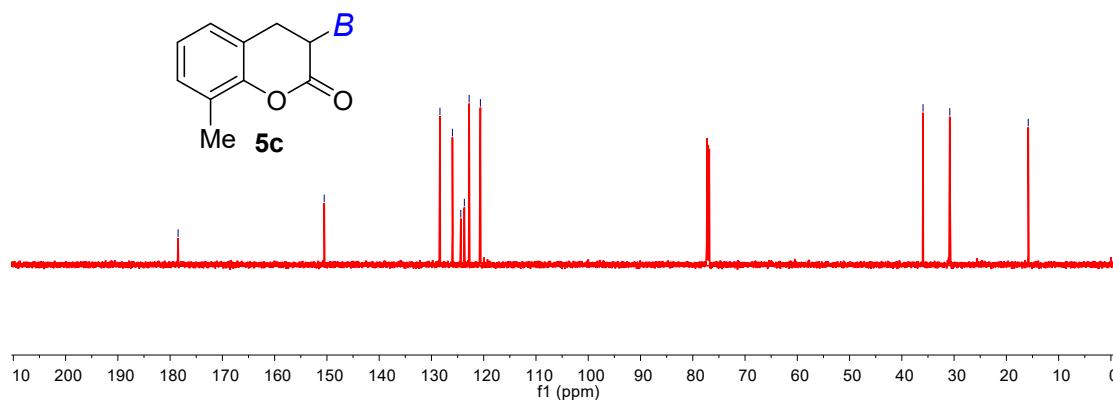

<sup>13</sup>C NMR (151 MHz, CDCl<sub>3</sub>)



-25.70  
-26.17  
-26.64

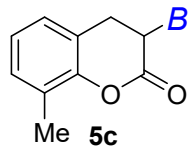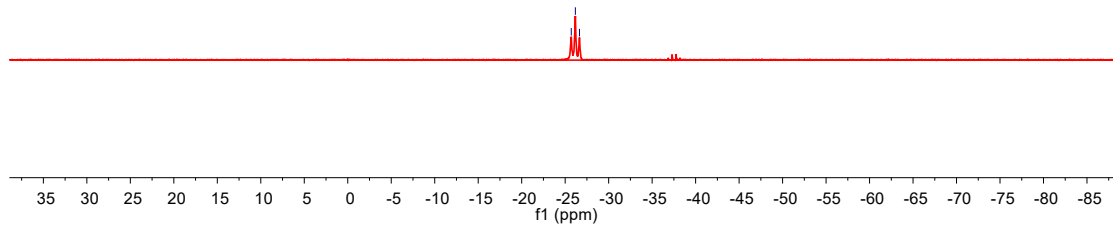

$^{11}\text{B}$  NMR (193 MHz,  $\text{CDCl}_3$ )

-26.17

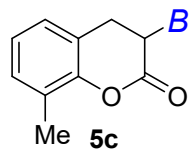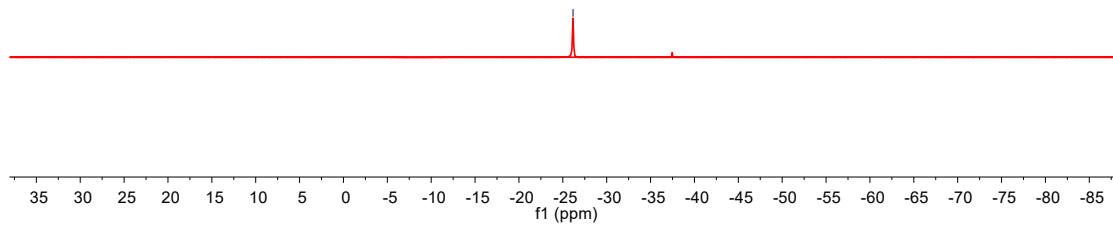

$^{11}\text{B}\{^1\text{H}\}$  NMR (193 MHz,  $\text{CDCl}_3$ )

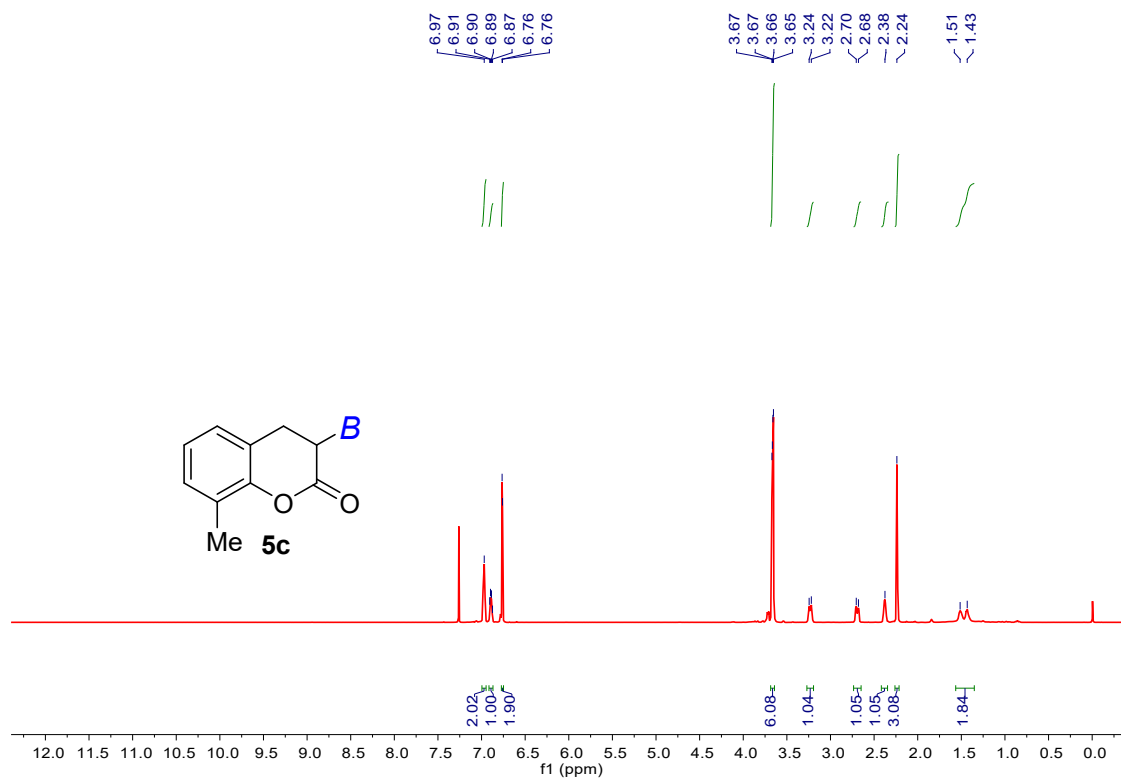

$^1\text{H}\{^{11}\text{B}\}$  NMR (600 MHz,  $\text{CDCl}_3$ )

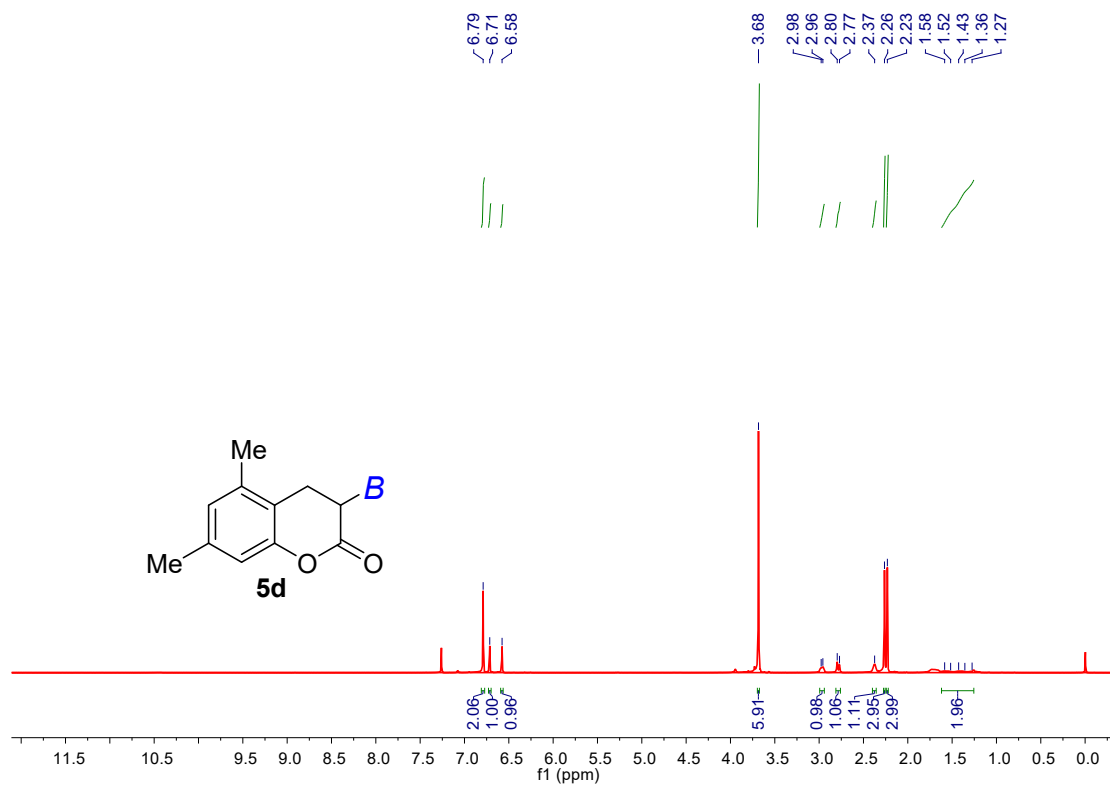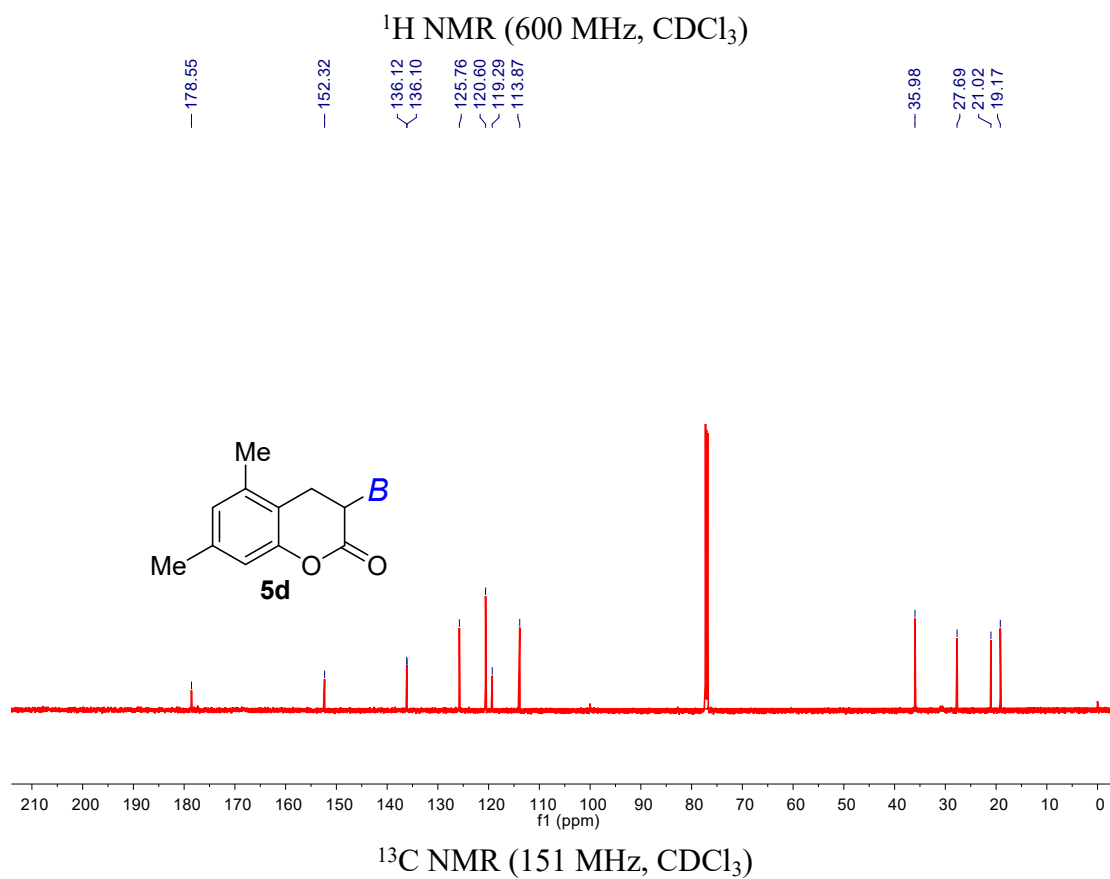

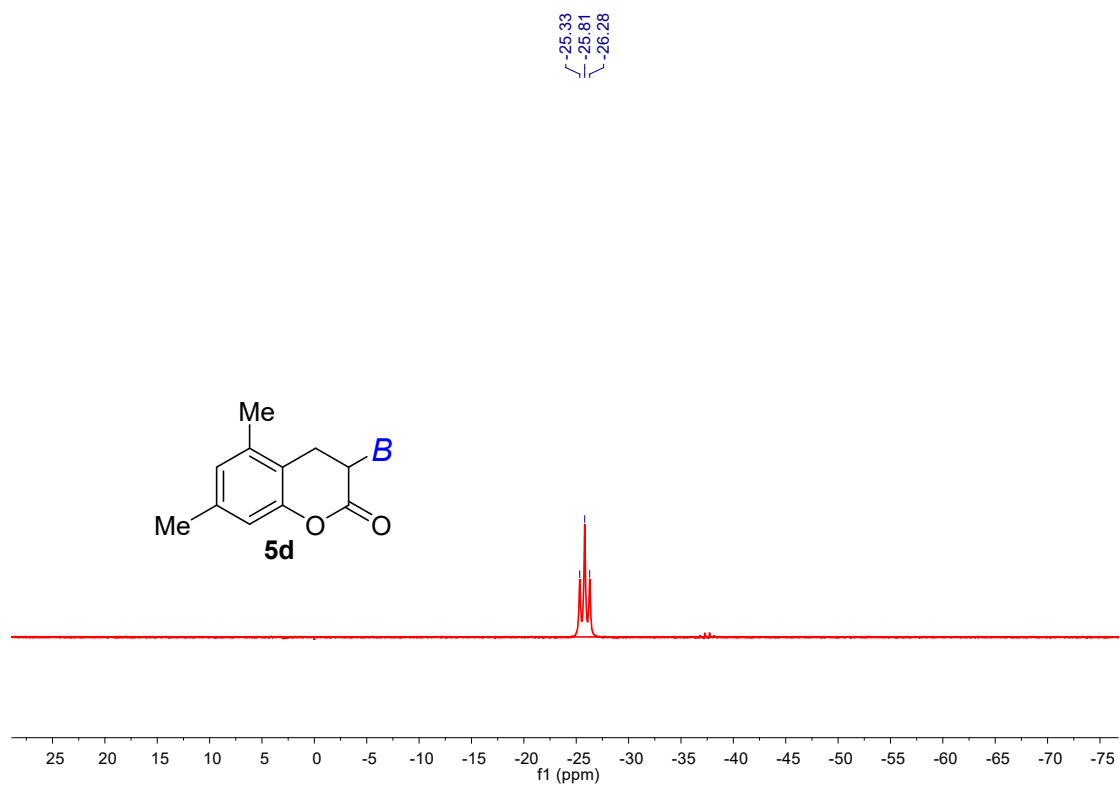

$^{11}\text{B}$  NMR (193 MHz,  $\text{CDCl}_3$ )

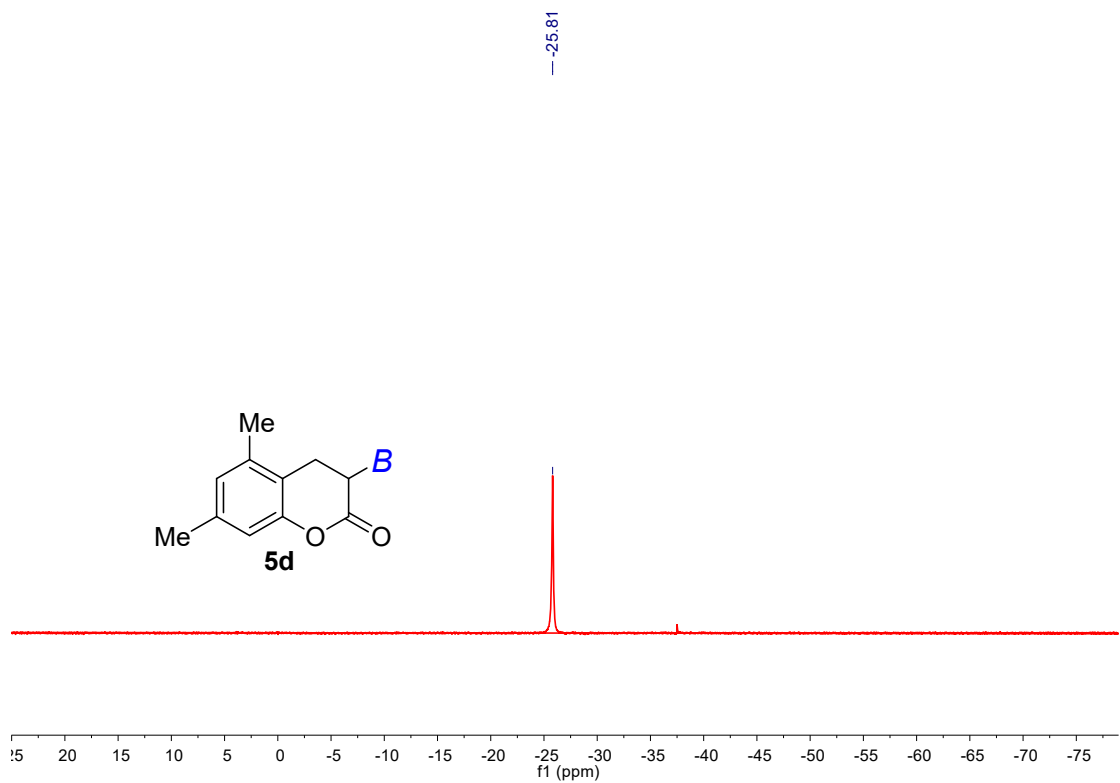

$^{11}\text{B}\{^1\text{H}\}$  NMR (193 MHz,  $\text{CDCl}_3$ )

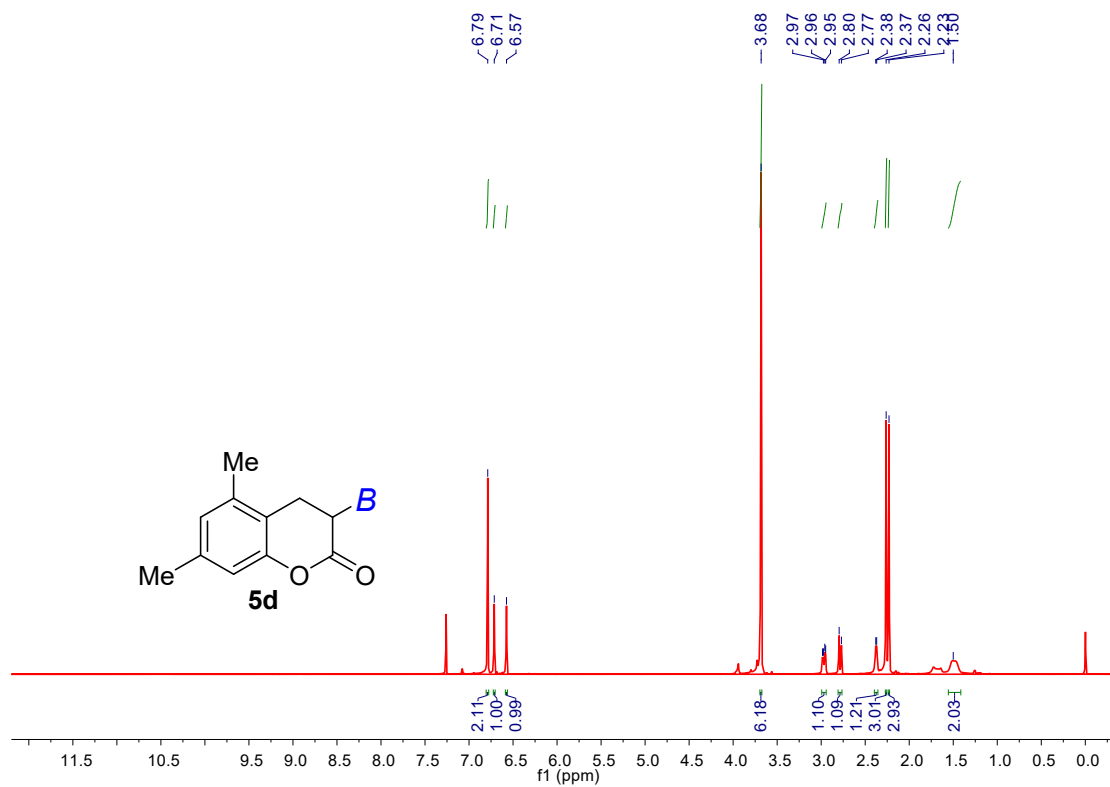

$^1\text{H}\{^{11}\text{B}\}$  NMR (600 MHz,  $\text{CDCl}_3$ )

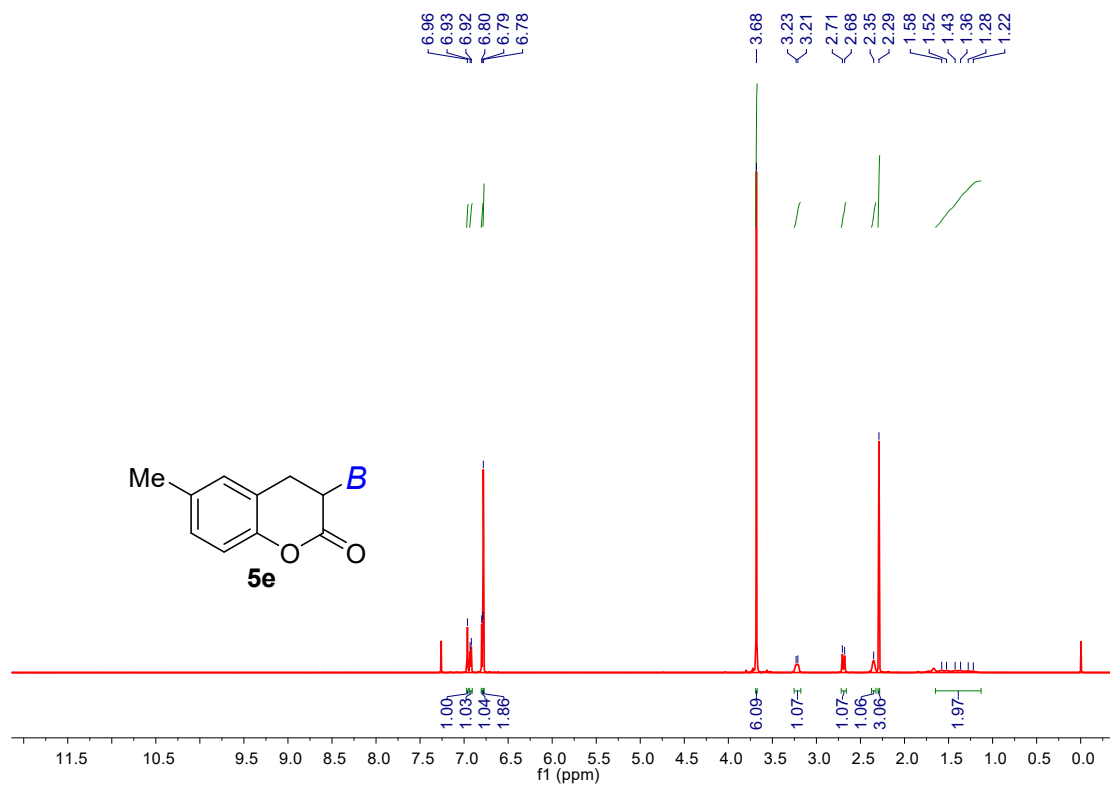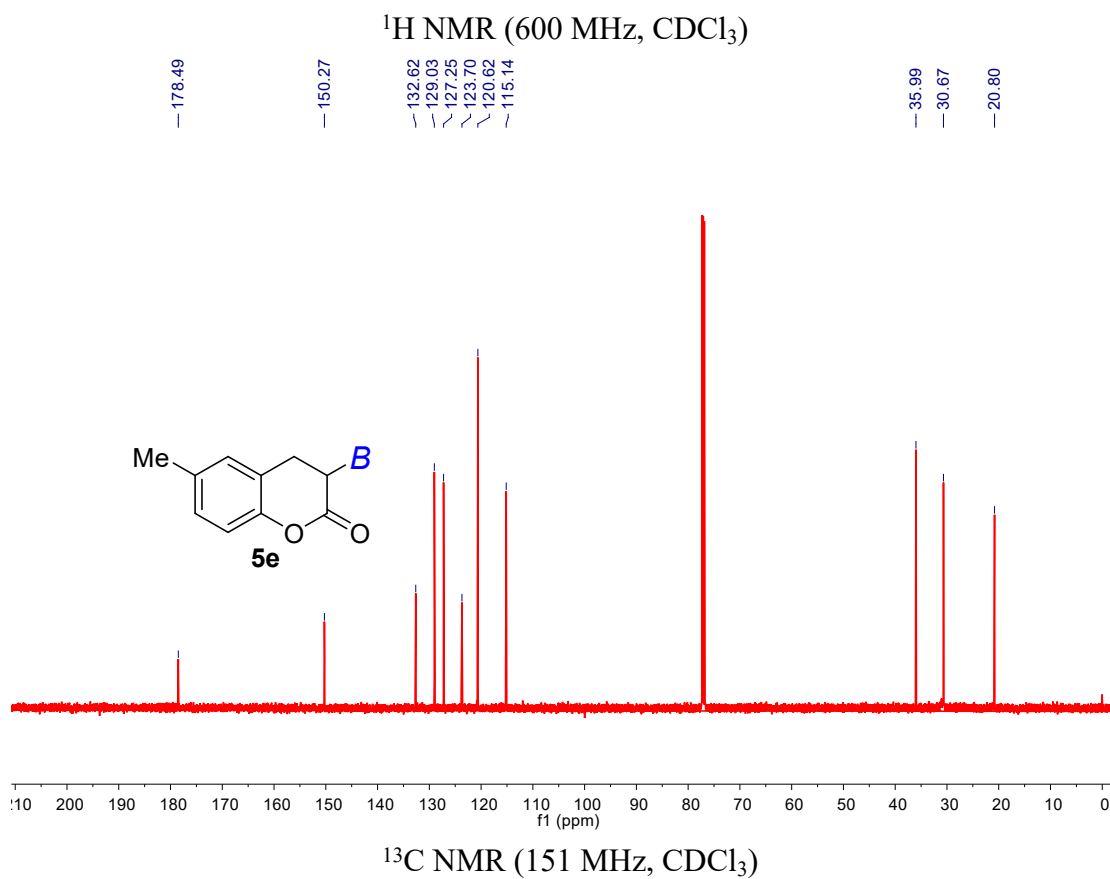

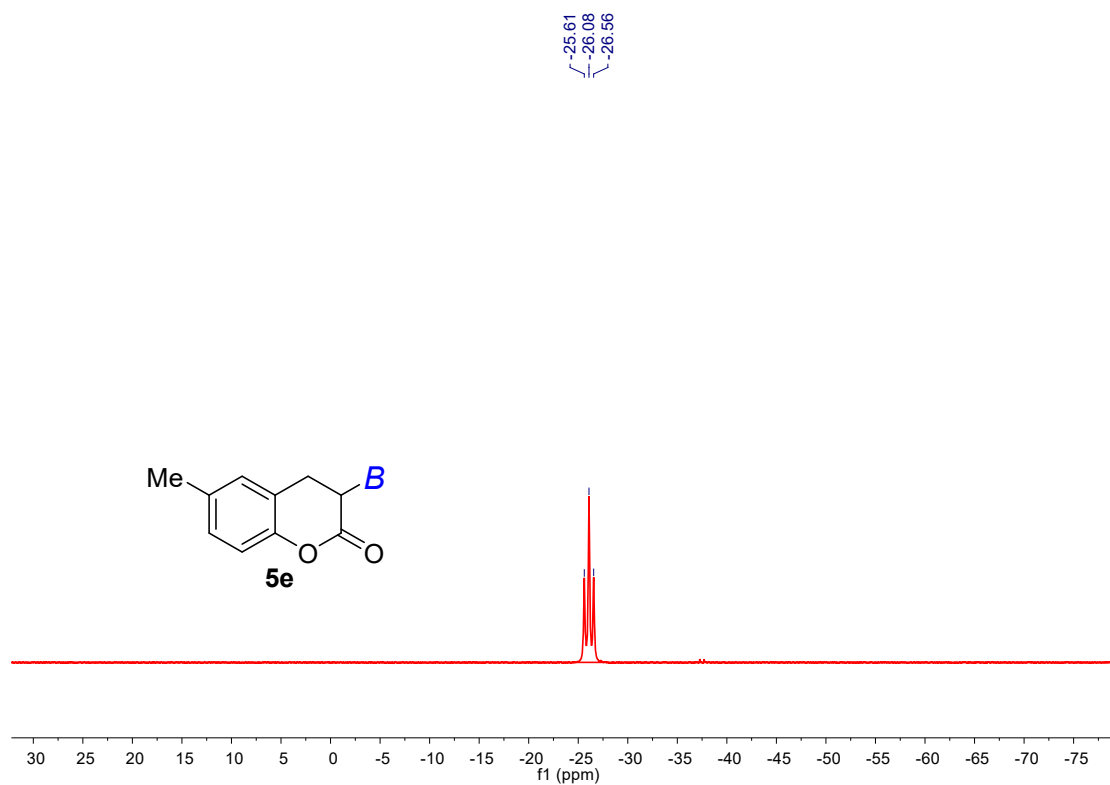

$^{11}\text{B}$  NMR (193 MHz,  $\text{CDCl}_3$ )

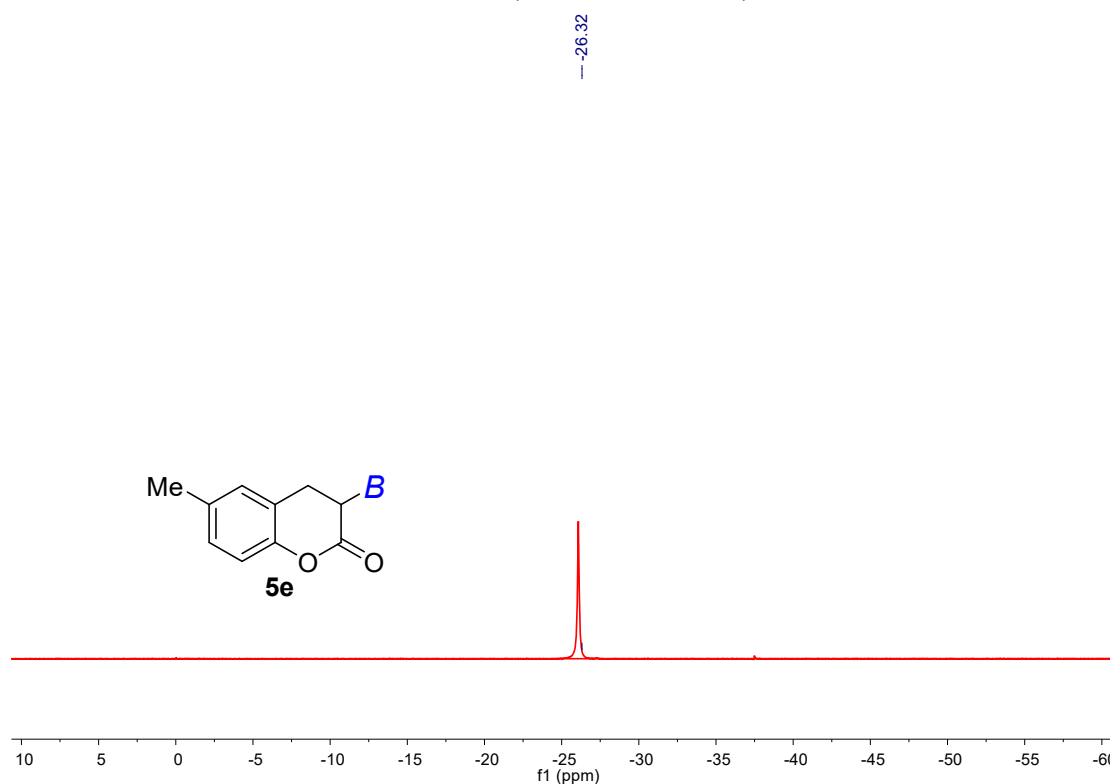

$^{11}\text{B}\{^1\text{H}\}$  NMR (193 MHz,  $\text{CDCl}_3$ )

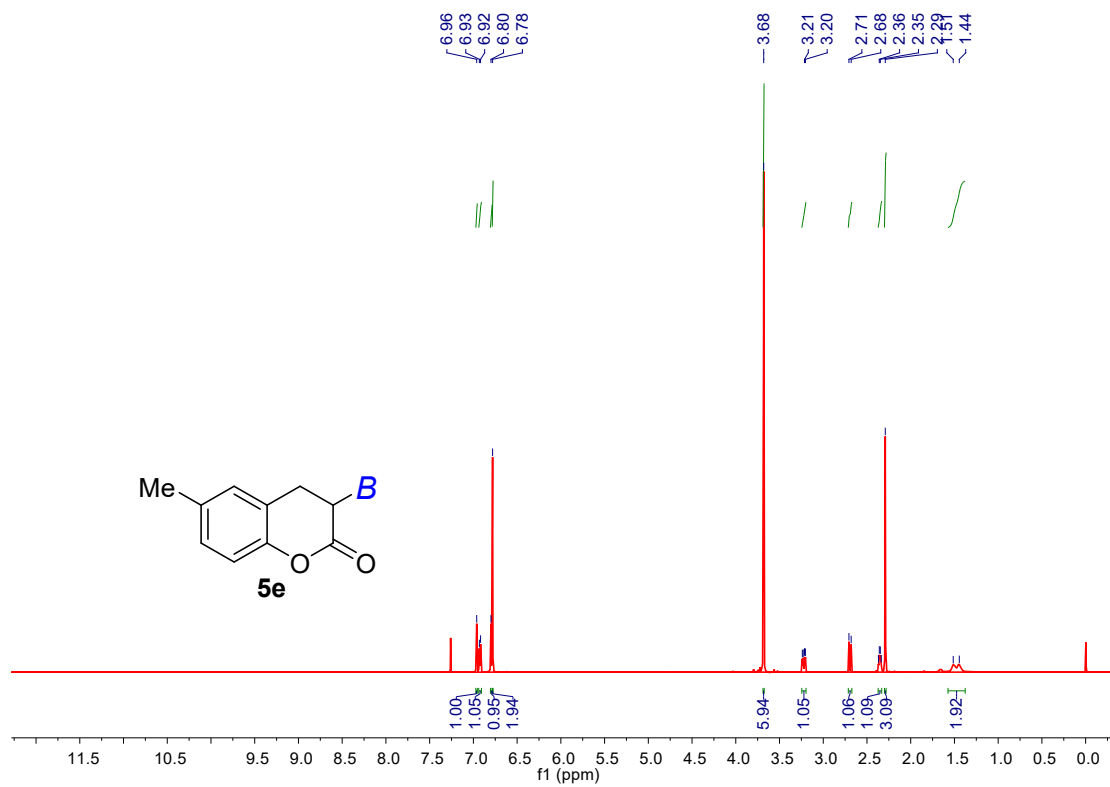

$^1\text{H}\{^{11}\text{B}\}$  NMR (600 MHz,  $\text{CDCl}_3$ )



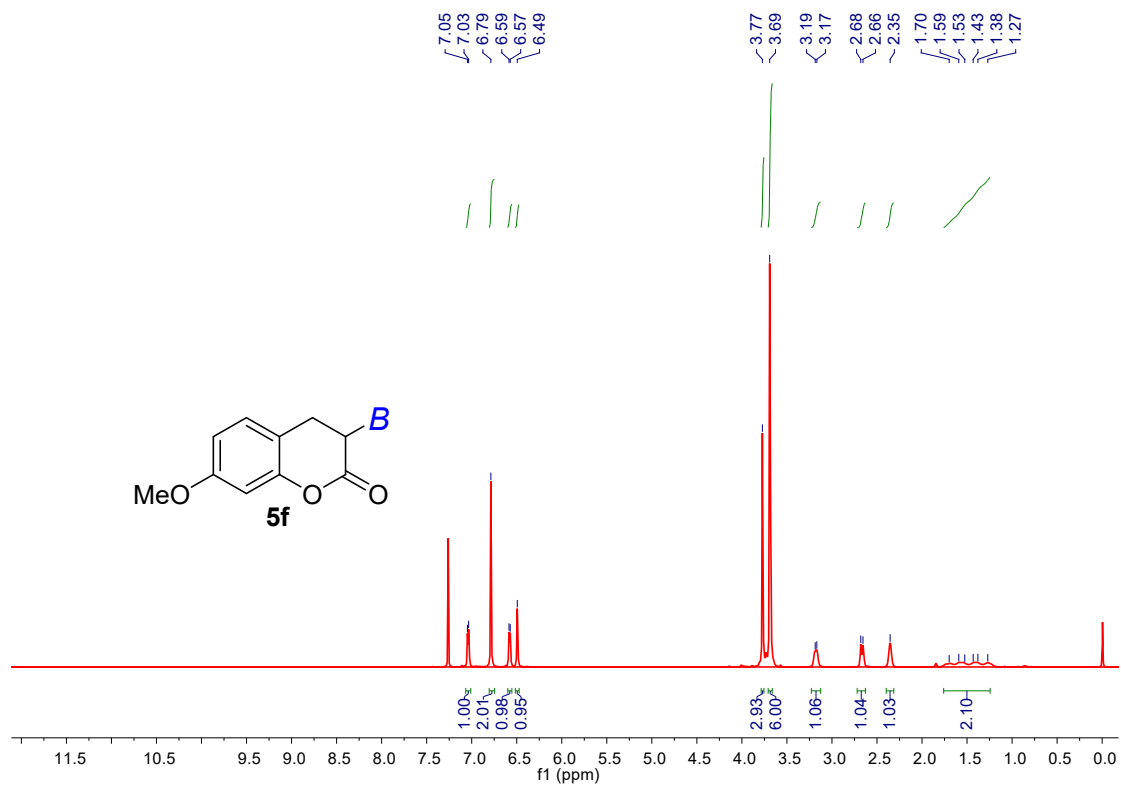

<sup>1</sup>H NMR (600 MHz, CDCl<sub>3</sub>)

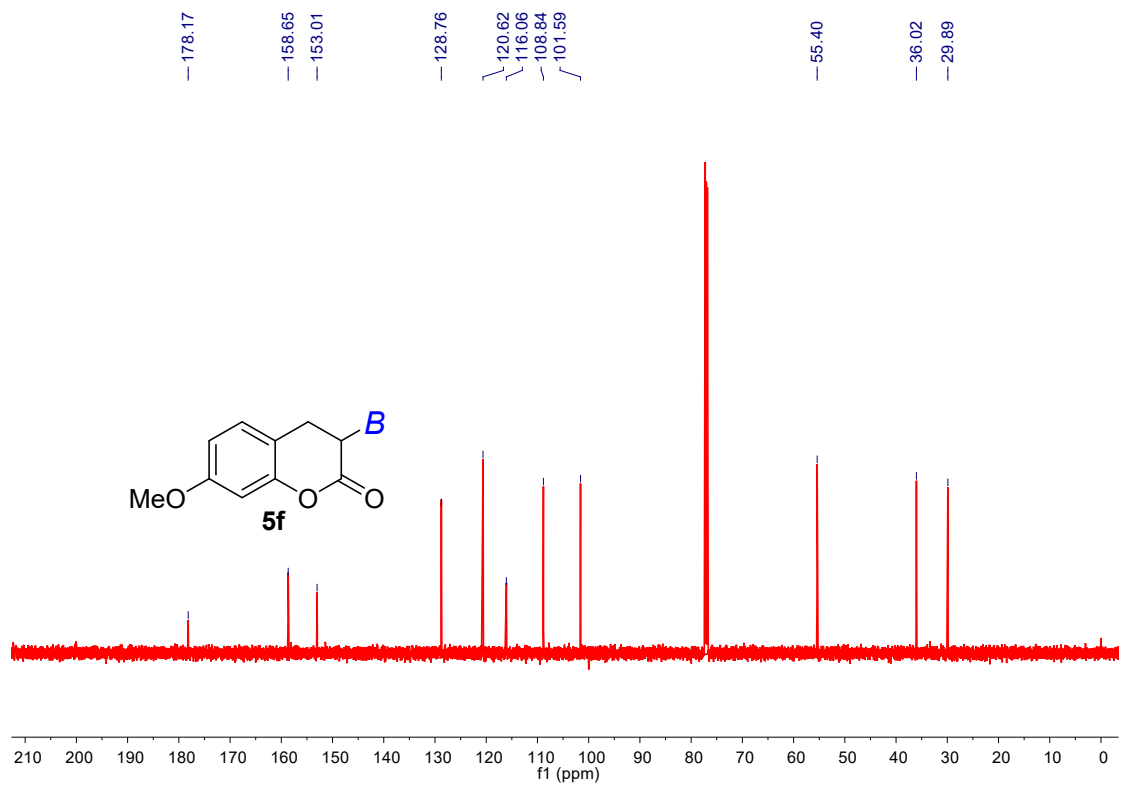

<sup>13</sup>C NMR (151 MHz, CDCl<sub>3</sub>)

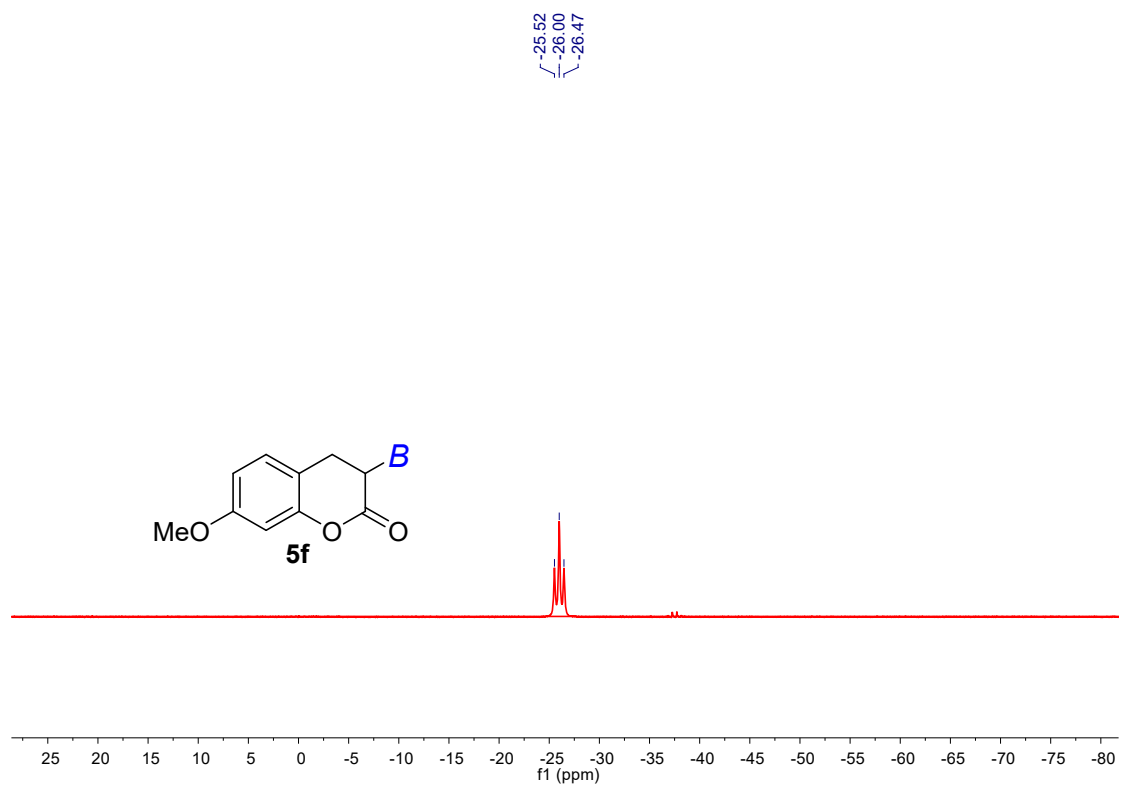

$^{11}\text{B}$  NMR (193 MHz,  $\text{CDCl}_3$ )

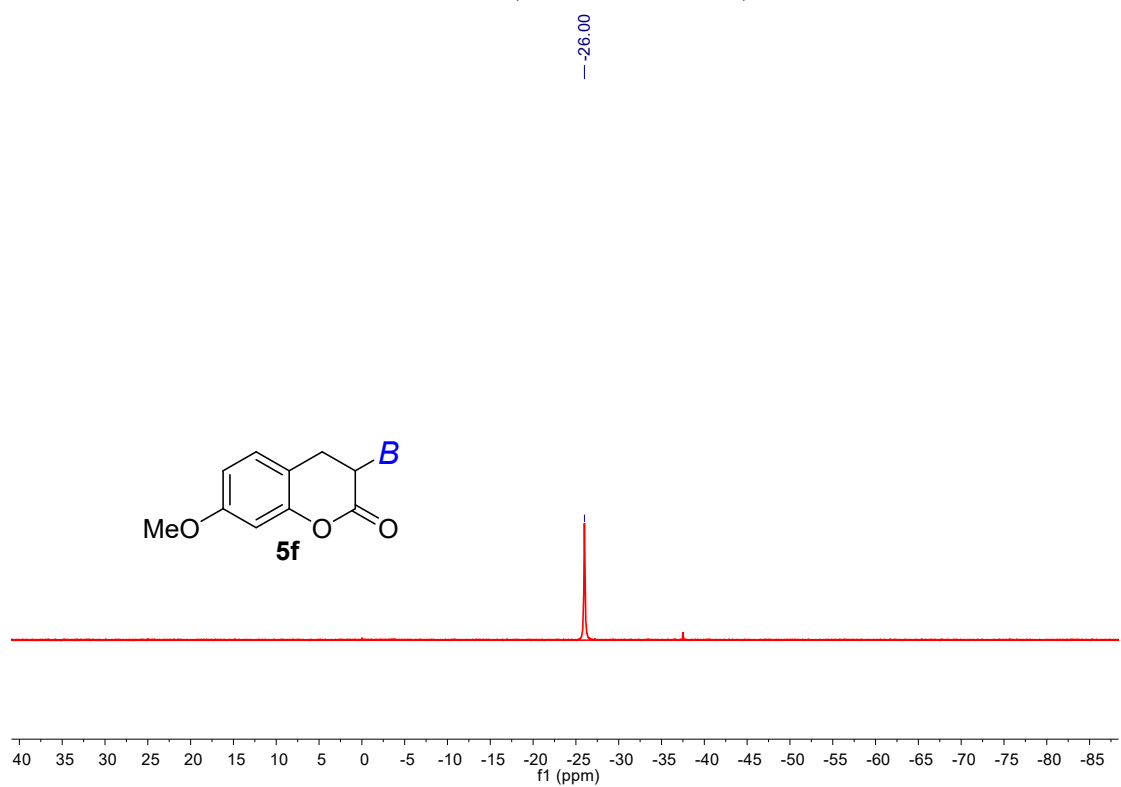

$^{11}\text{B}\{^1\text{H}\}$  NMR (193 MHz,  $\text{CDCl}_3$ )

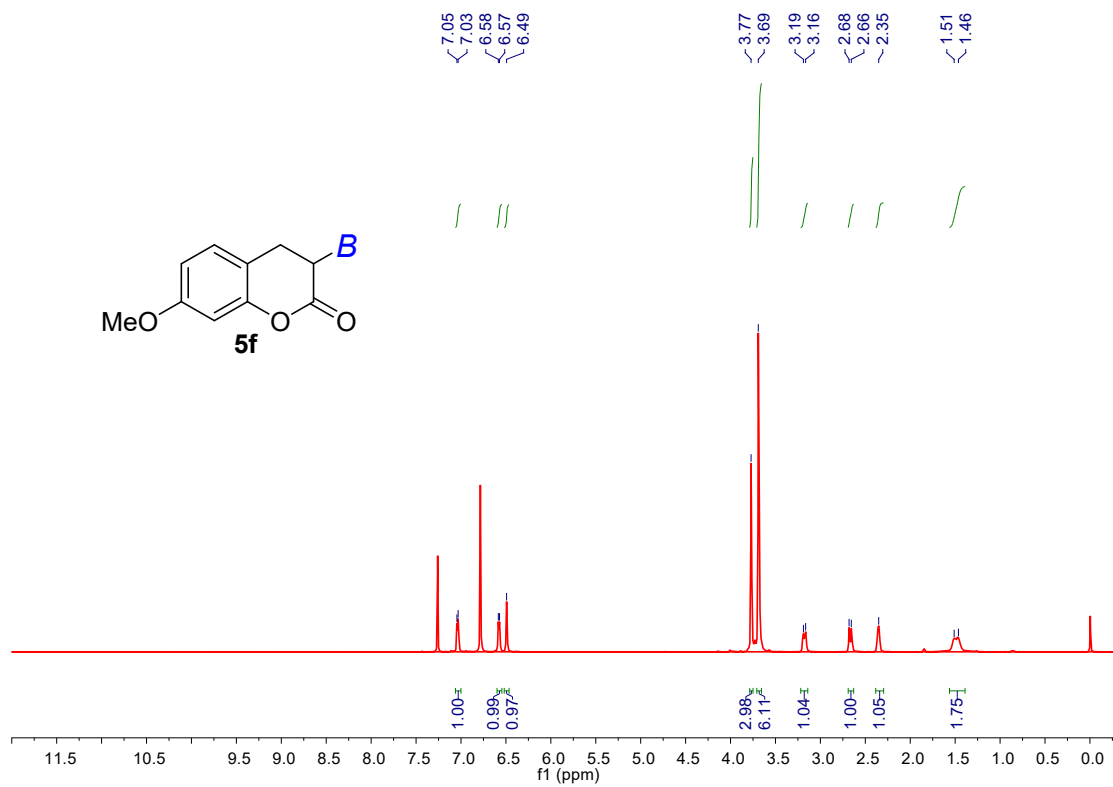

$^1\text{H}\{^{11}\text{B}\}$  NMR (600 MHz,  $\text{CDCl}_3$ )

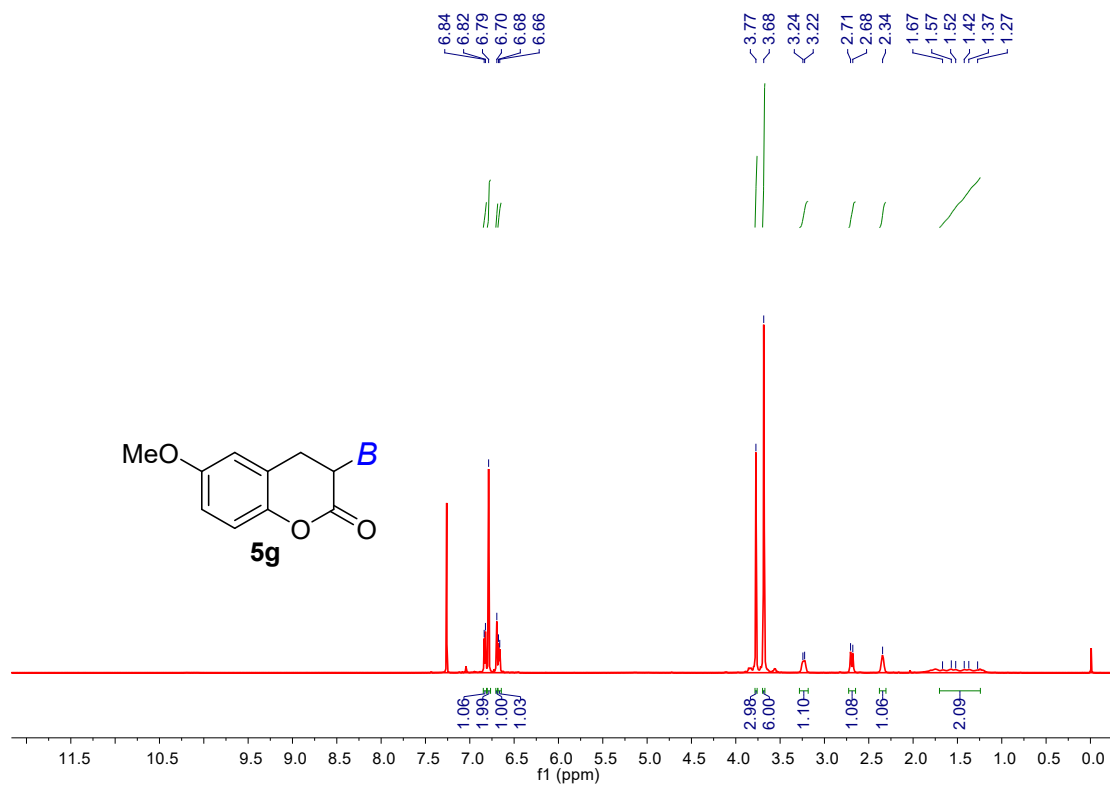

<sup>1</sup>H NMR (600 MHz, CDCl<sub>3</sub>)

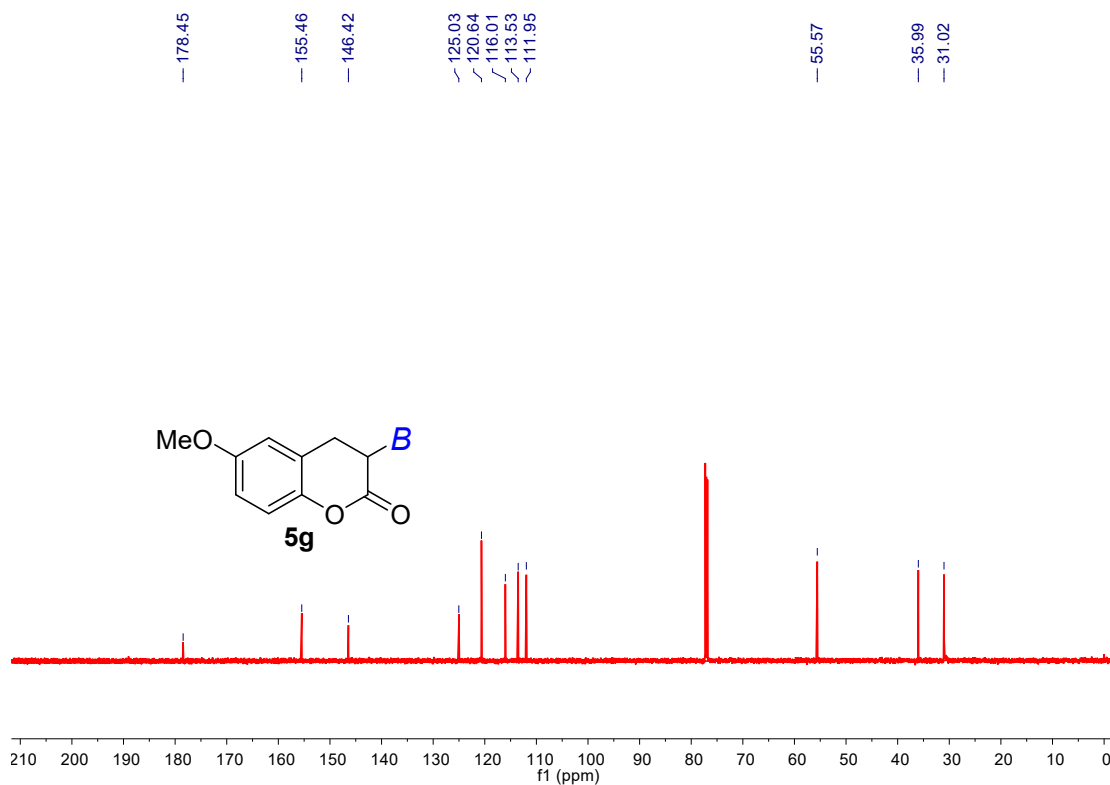

<sup>13</sup>C NMR (151 MHz, CDCl<sub>3</sub>)

-25.65  
-26.12  
-26.60

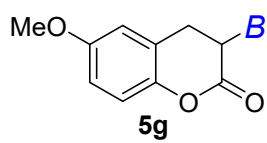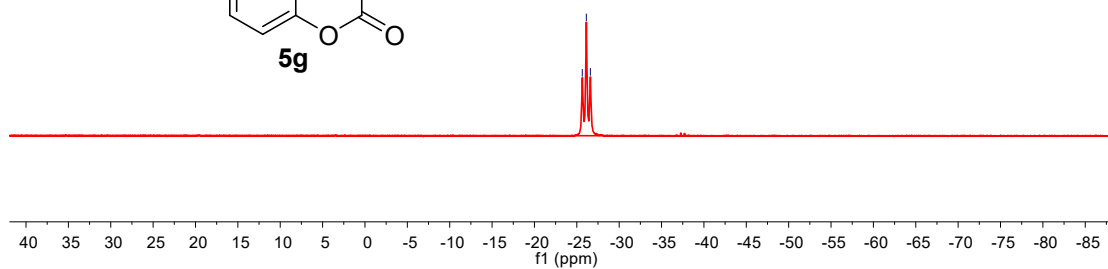

$^{11}\text{B}$  NMR (193 MHz,  $\text{CDCl}_3$ )

-26.13

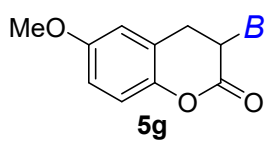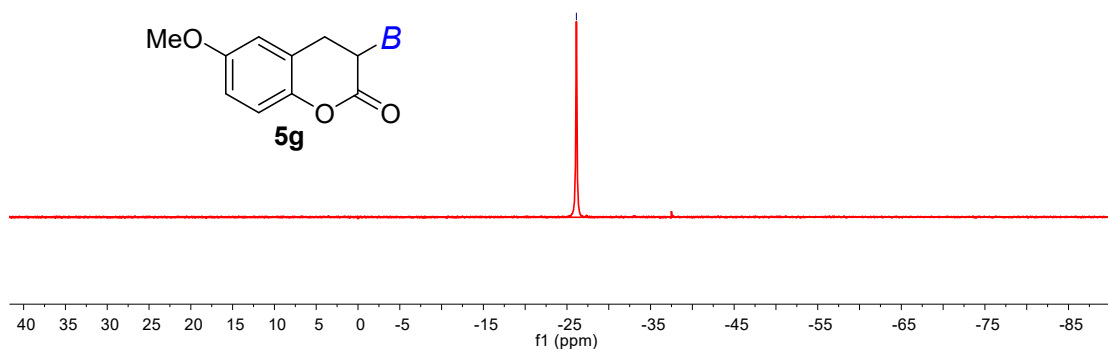

$^{11}\text{B}\{^1\text{H}\}$  NMR (193 MHz,  $\text{CDCl}_3$ )

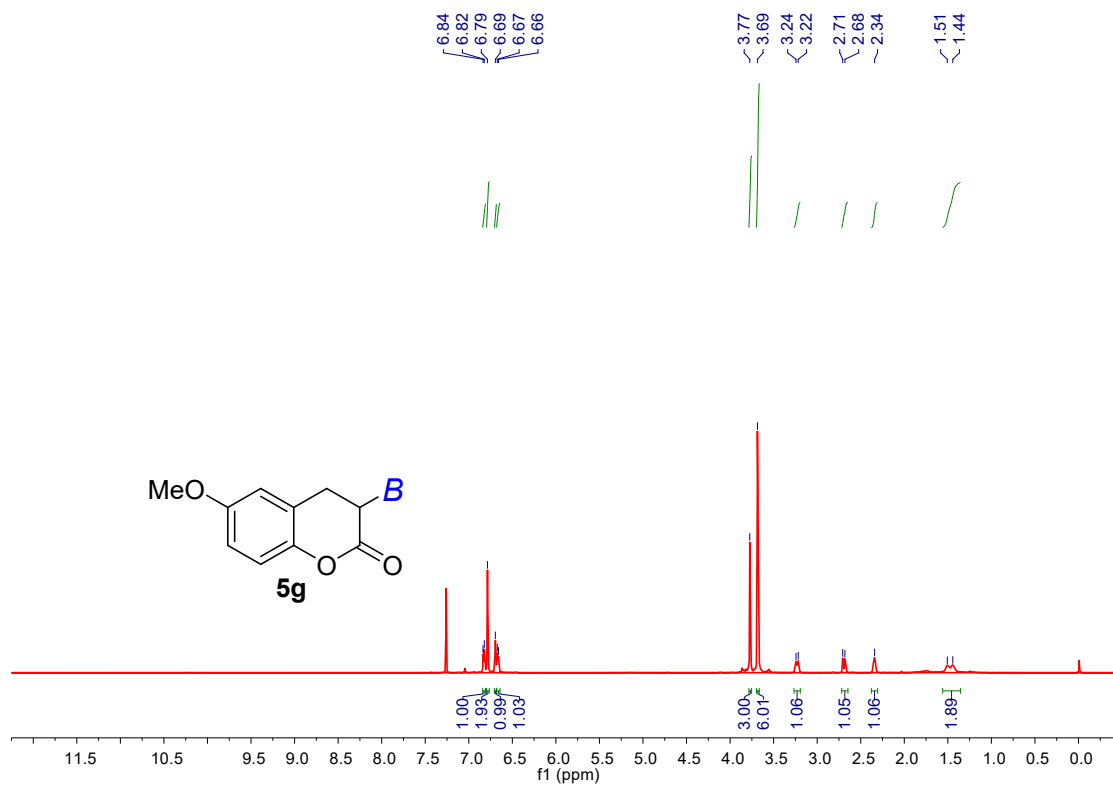

$^1\text{H}\{^{11}\text{B}\}$  NMR (600 MHz,  $\text{CDCl}_3$ )

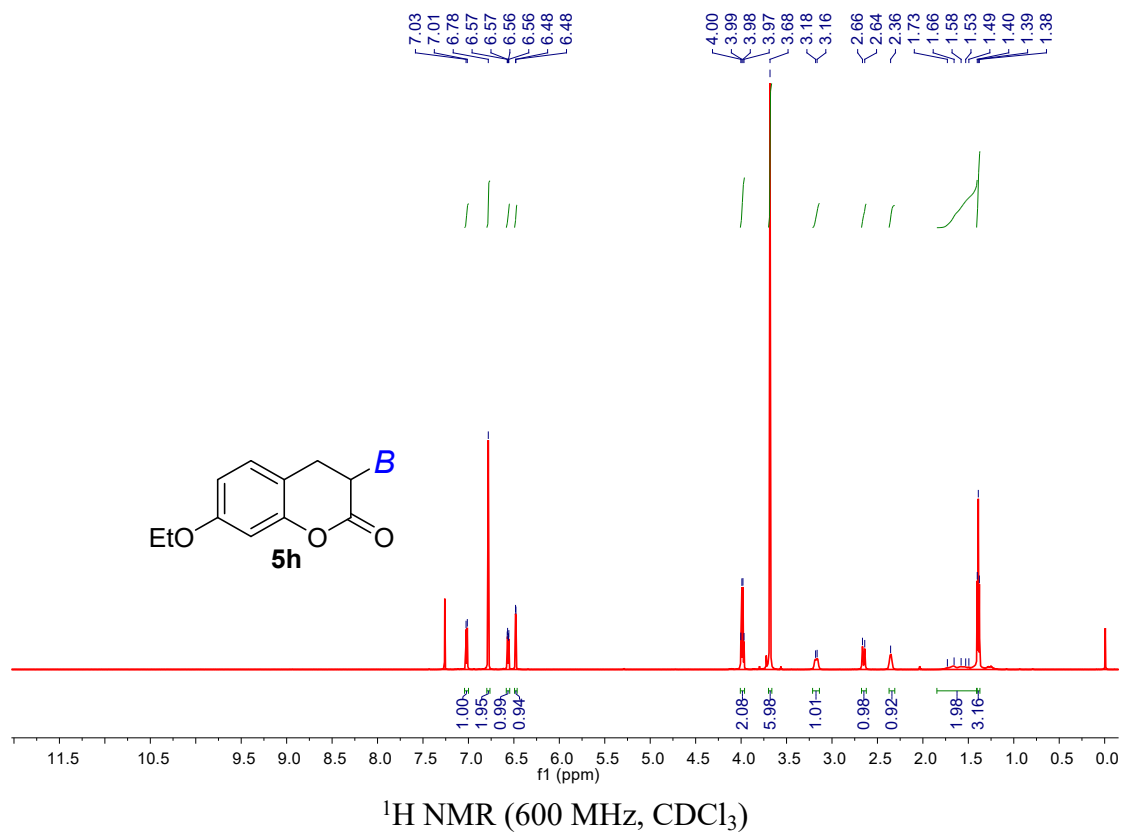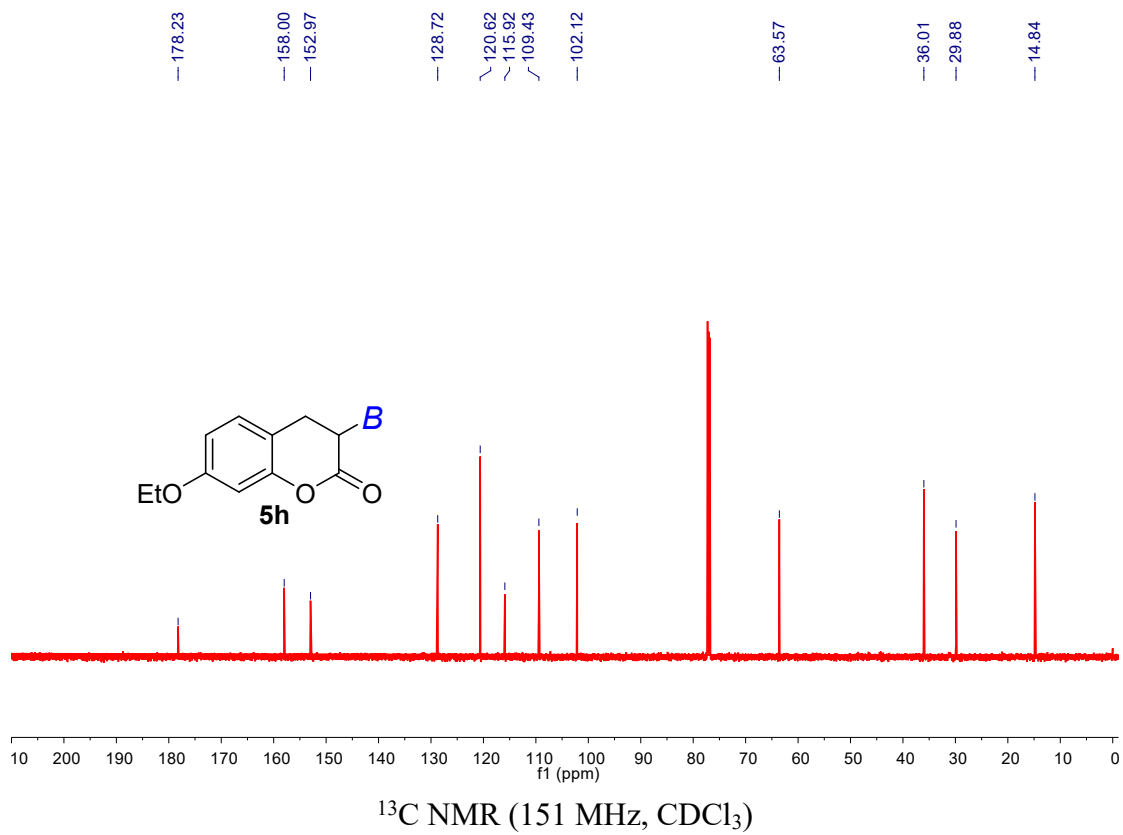

-25.54  
-26.01  
-26.48

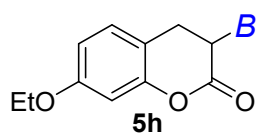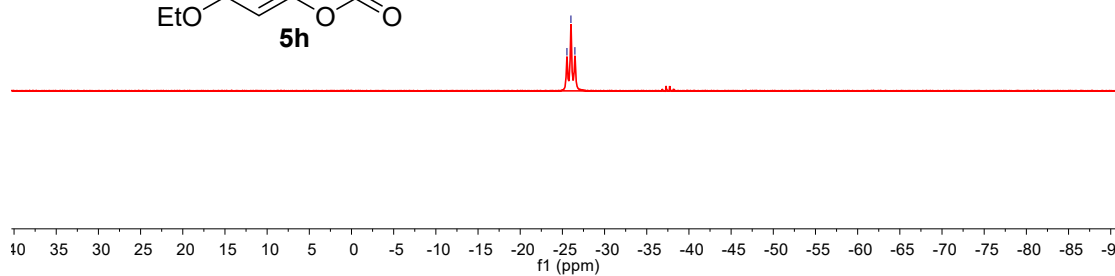

$^{11}\text{B}$  NMR (193 MHz,  $\text{CDCl}_3$ )

-26.01

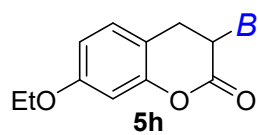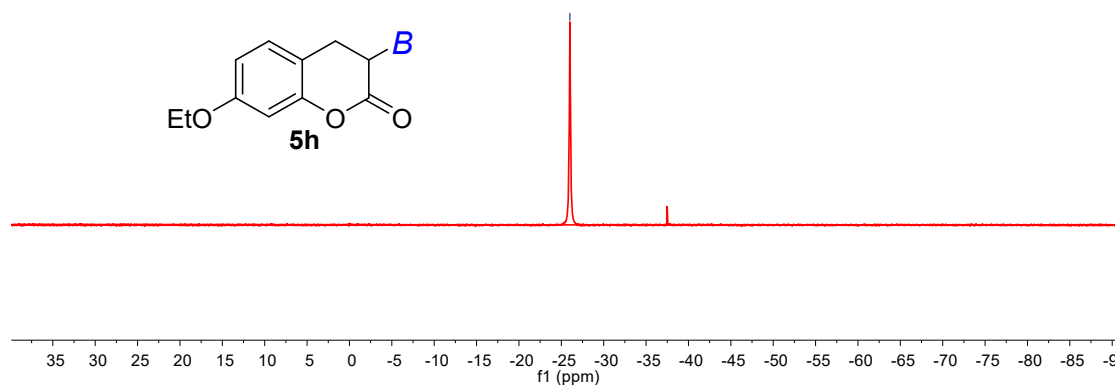

$^{11}\text{B}\{^1\text{H}\}$  NMR (193 MHz,  $\text{CDCl}_3$ )



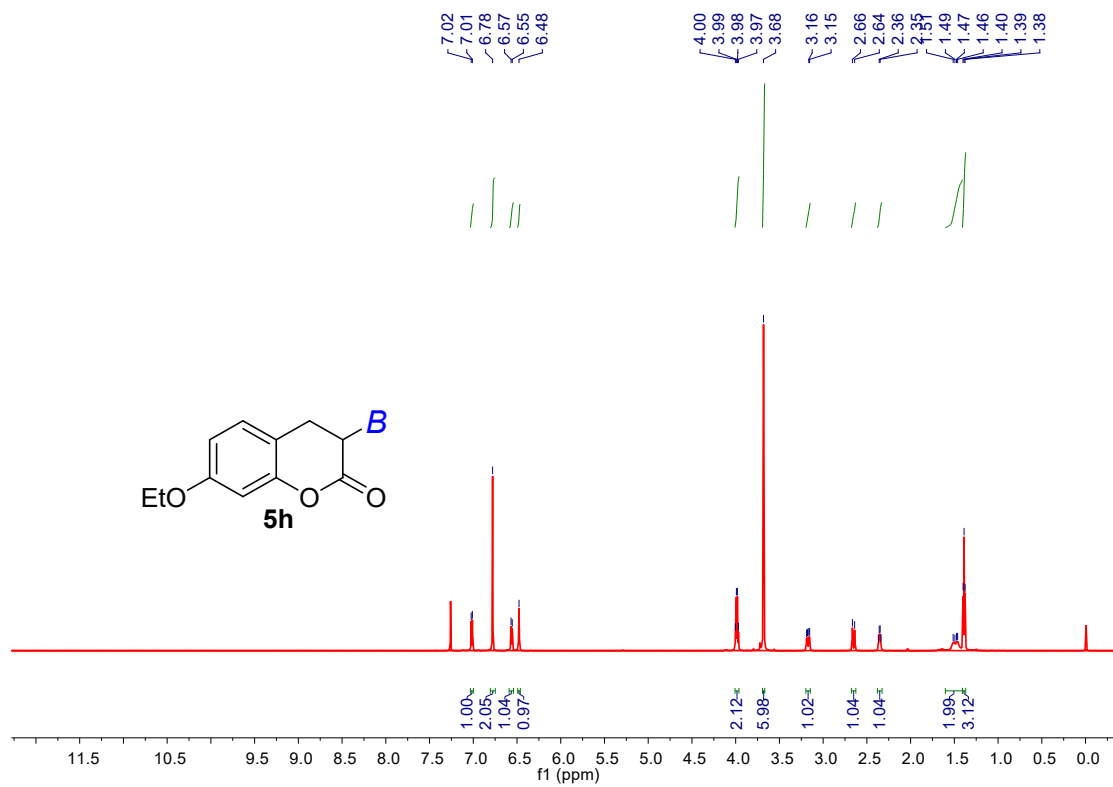

$^1\text{H}\{^{11}\text{B}\}$  NMR (600 MHz,  $\text{CDCl}_3$ )

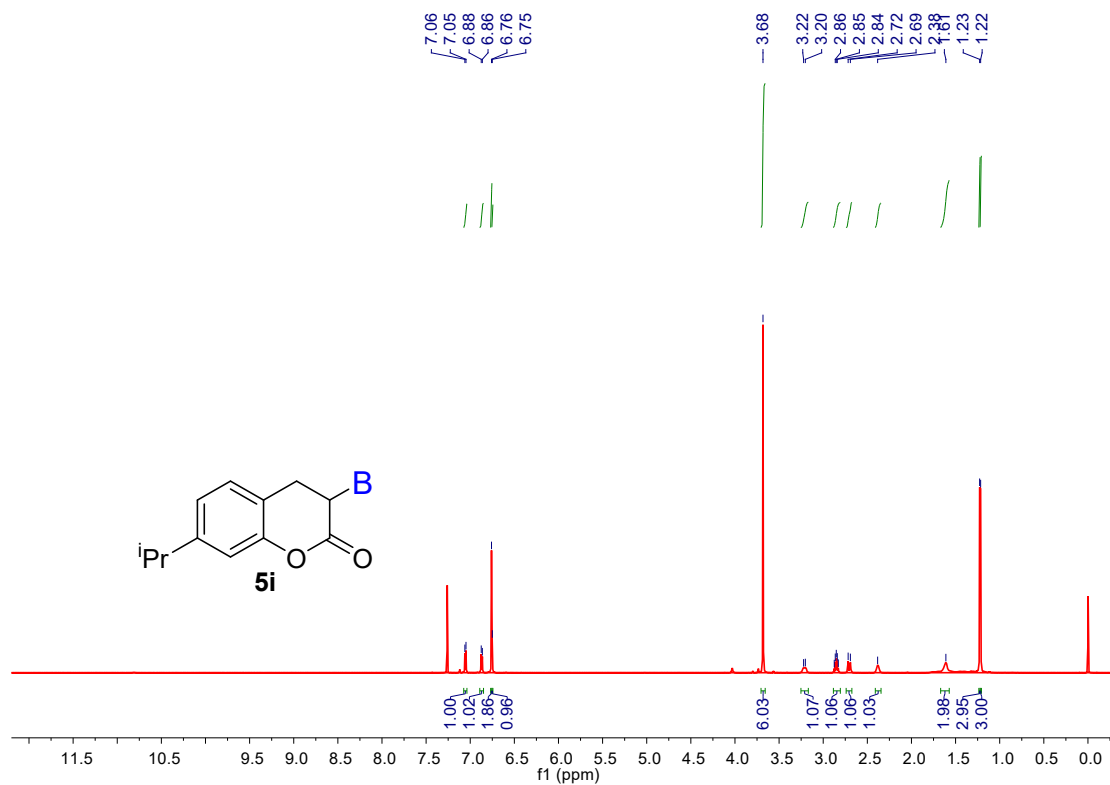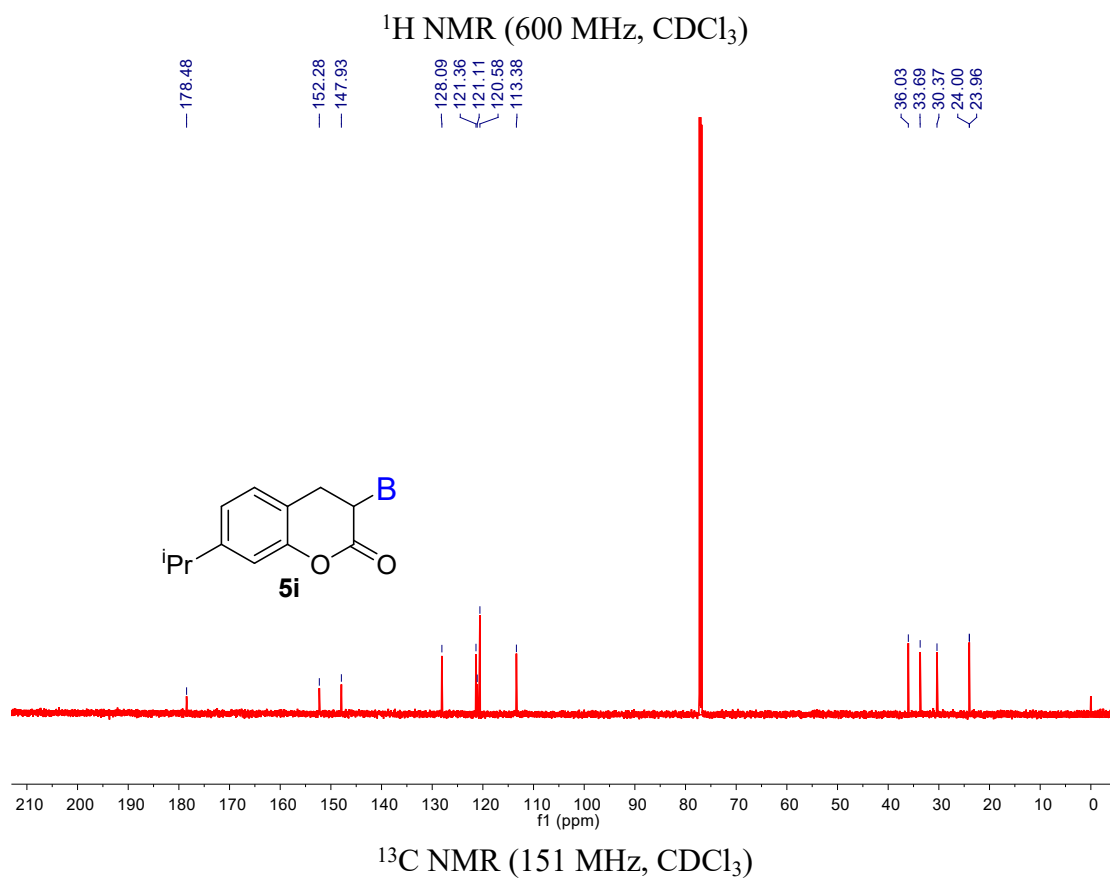

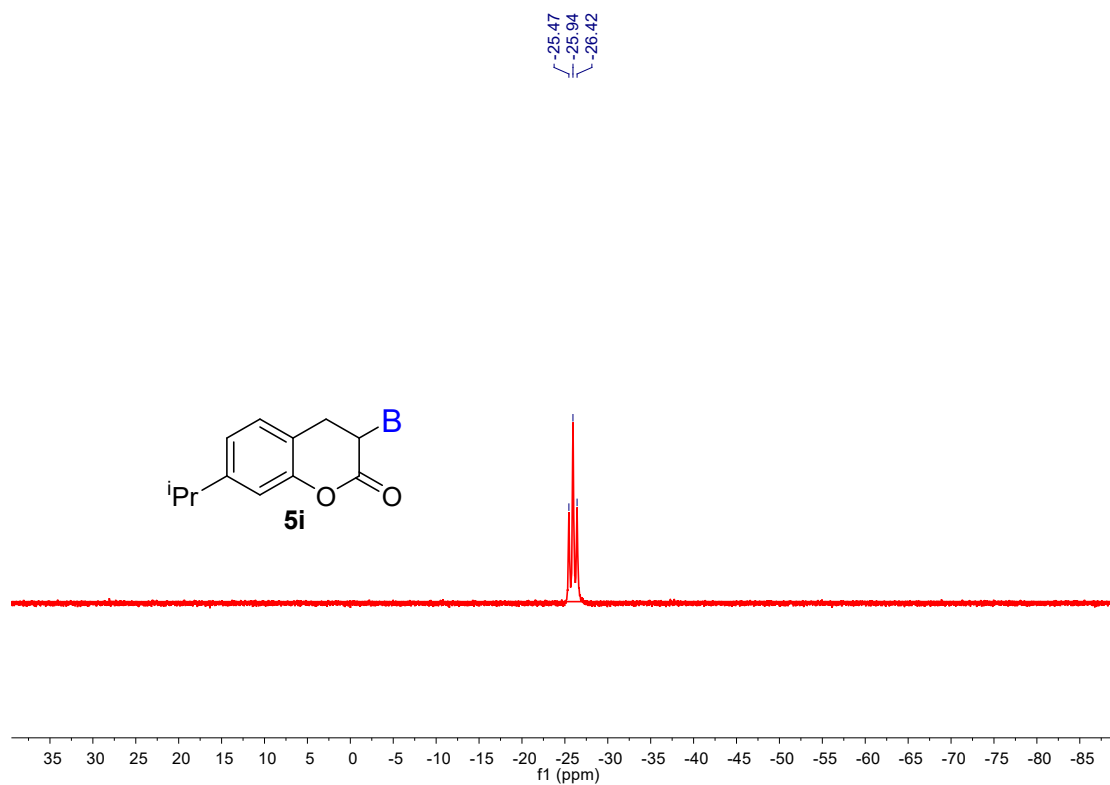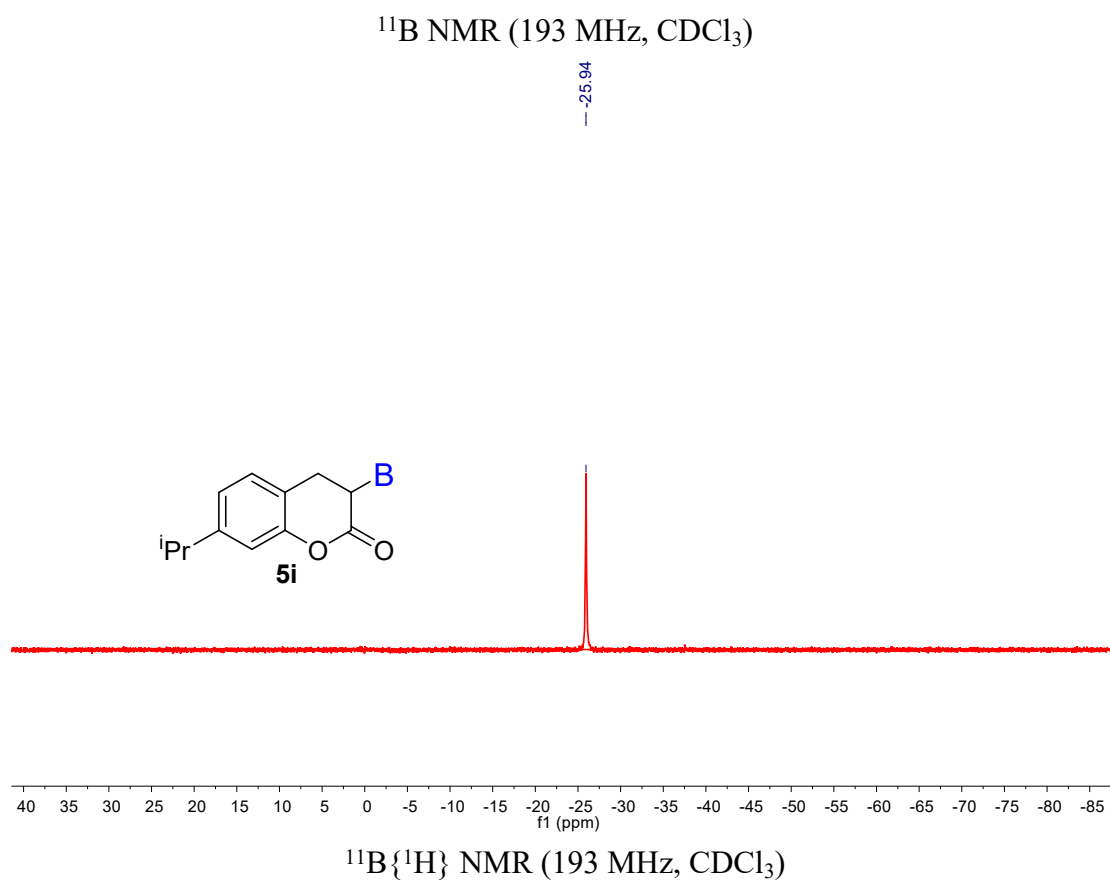

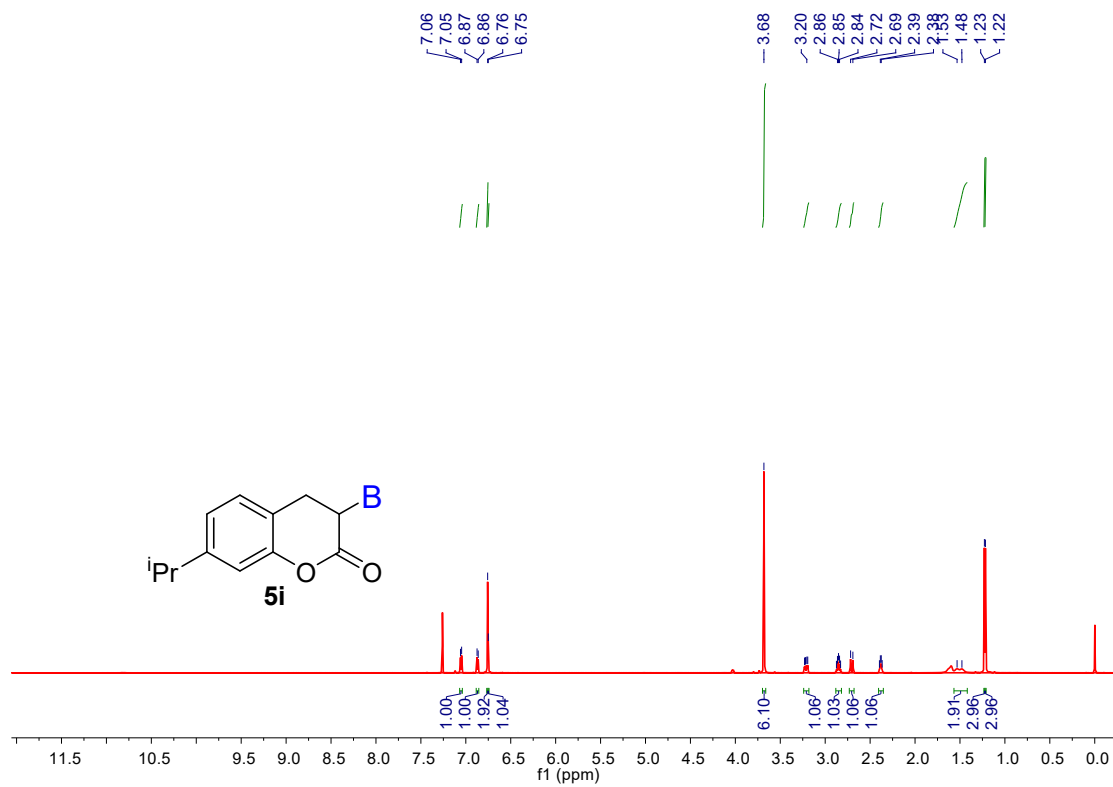

$^1\text{H}\{^{11}\text{B}\}$  NMR (600 MHz,  $\text{CDCl}_3$ )

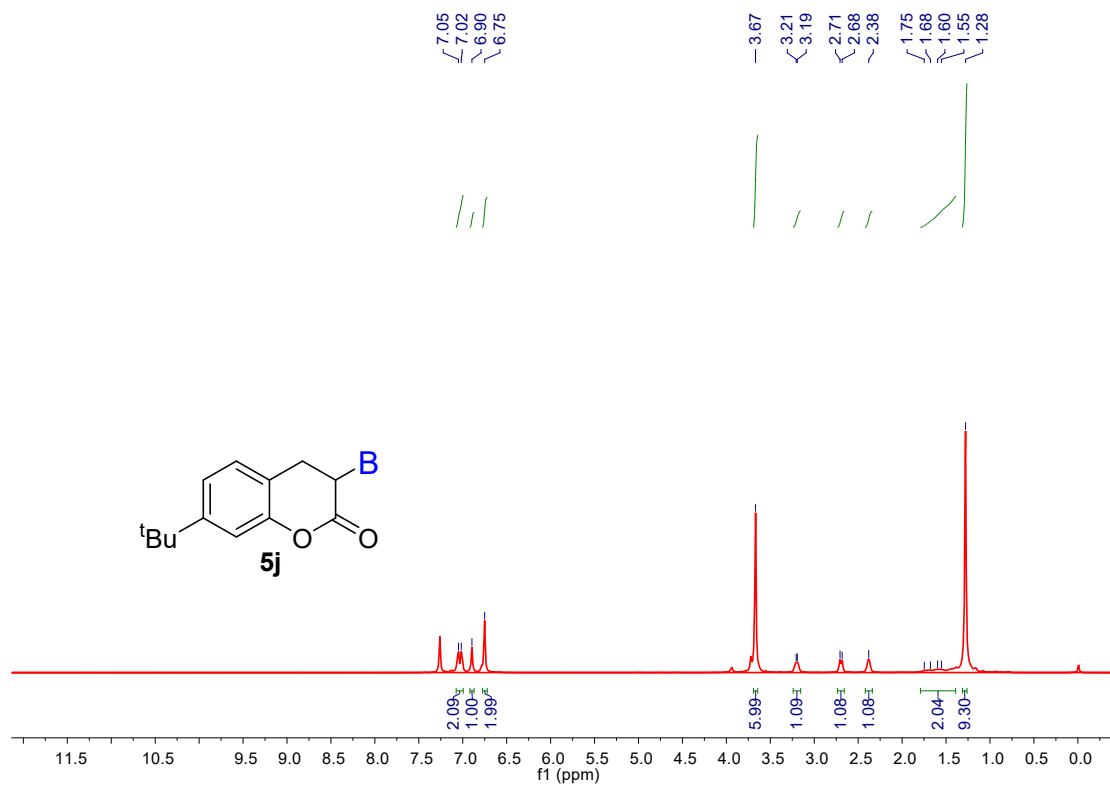

<sup>1</sup>H NMR (600 MHz, CDCl<sub>3</sub>)

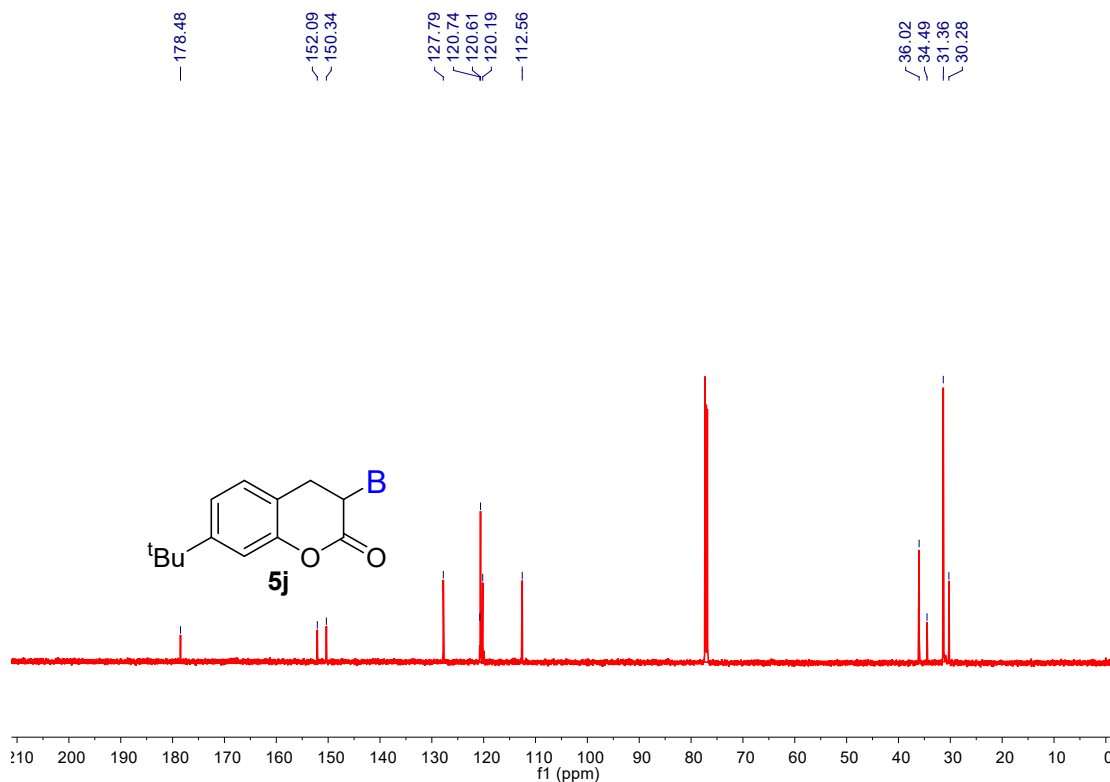

<sup>13</sup>C NMR (151 MHz, CDCl<sub>3</sub>)

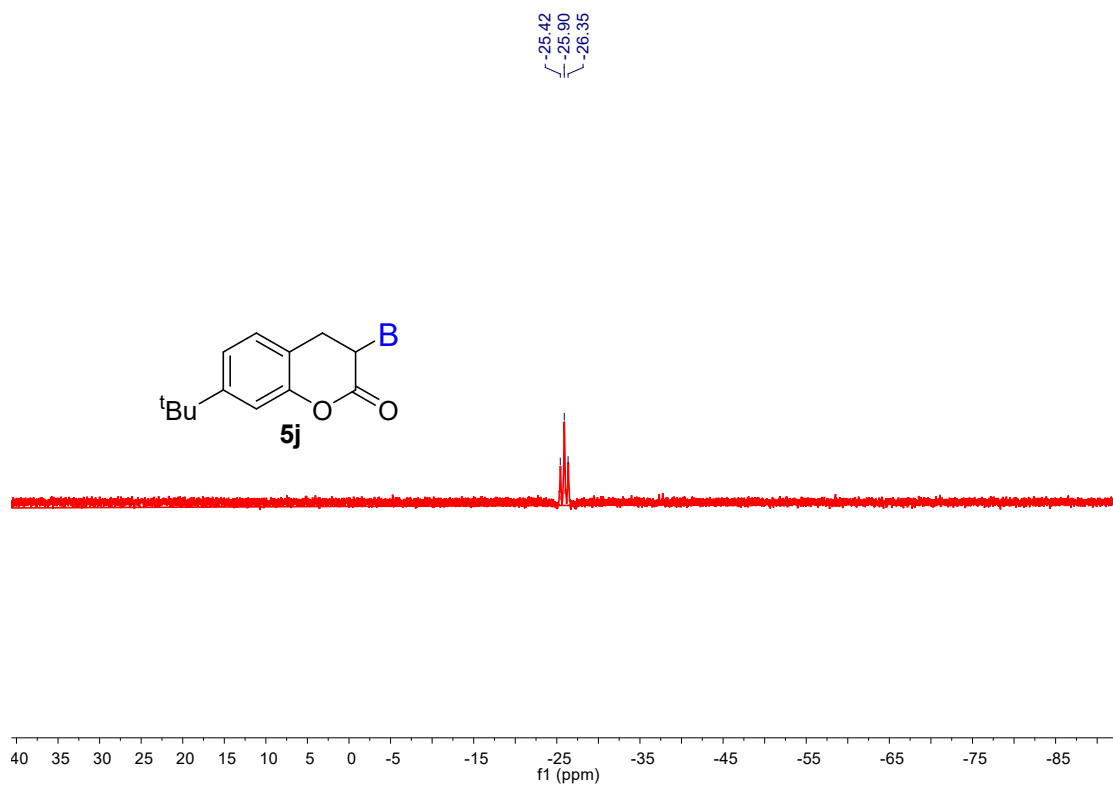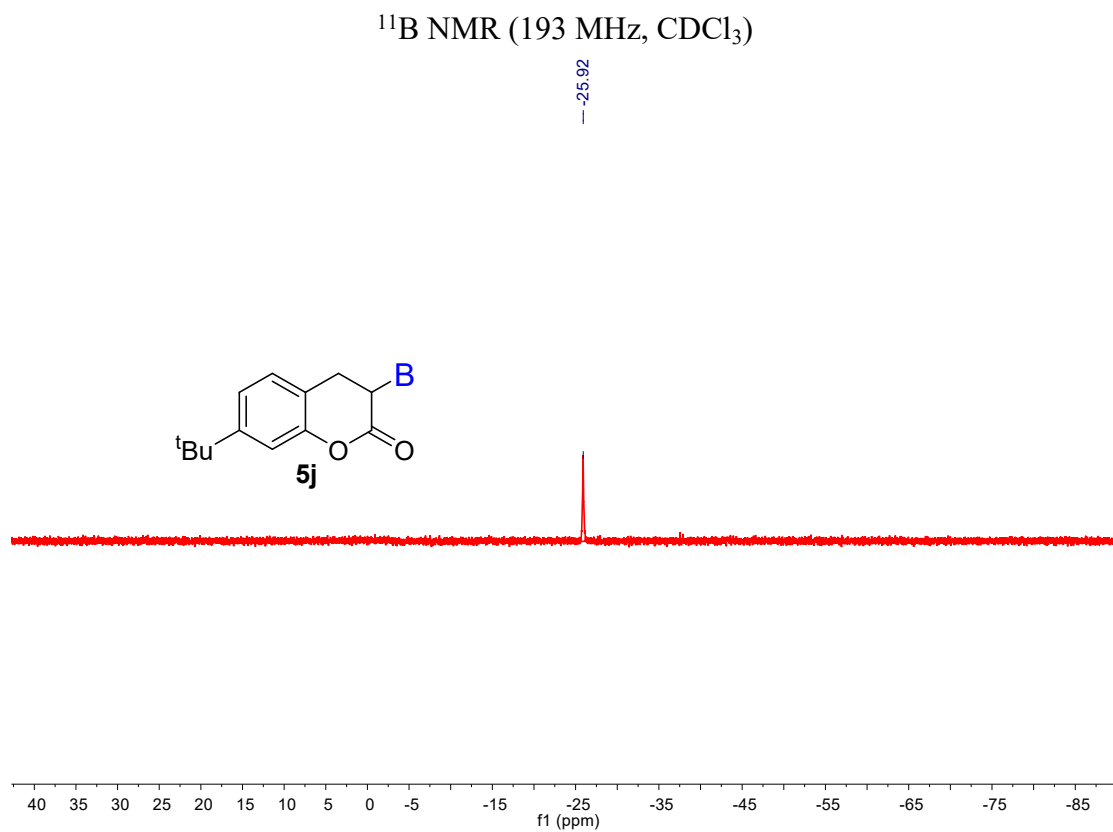

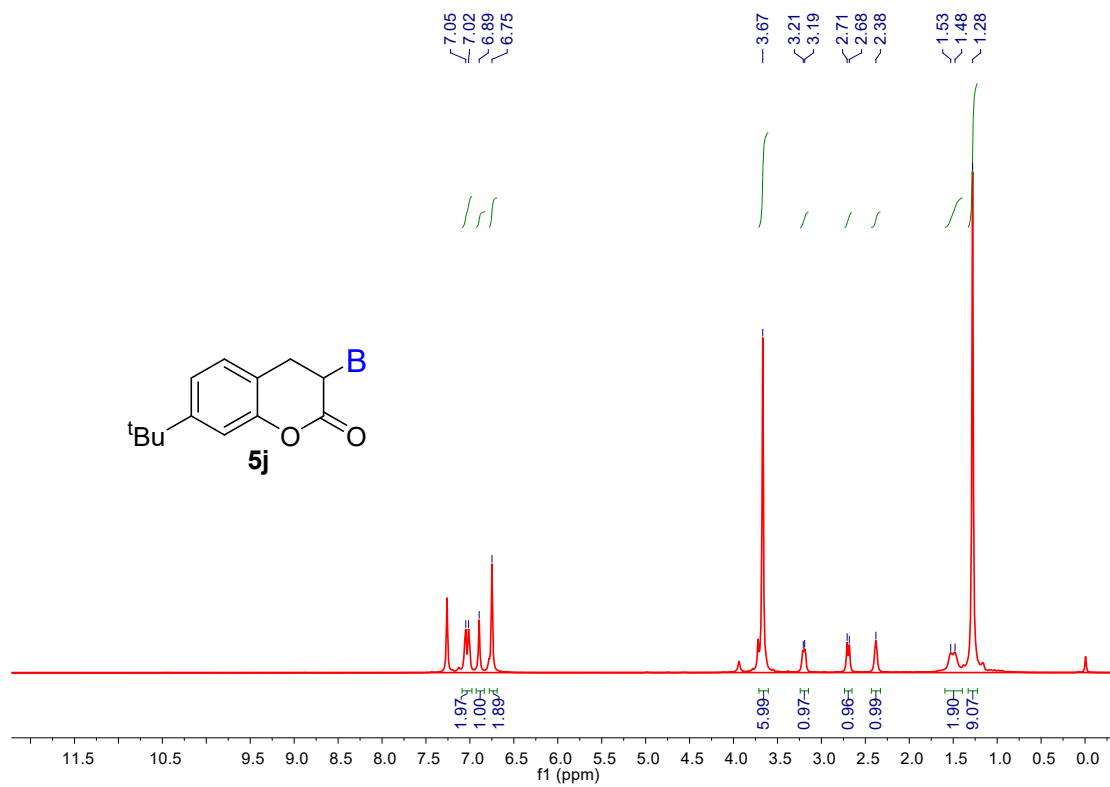

$^1\text{H}\{^{11}\text{B}\}$  NMR (600 MHz,  $\text{CDCl}_3$ )

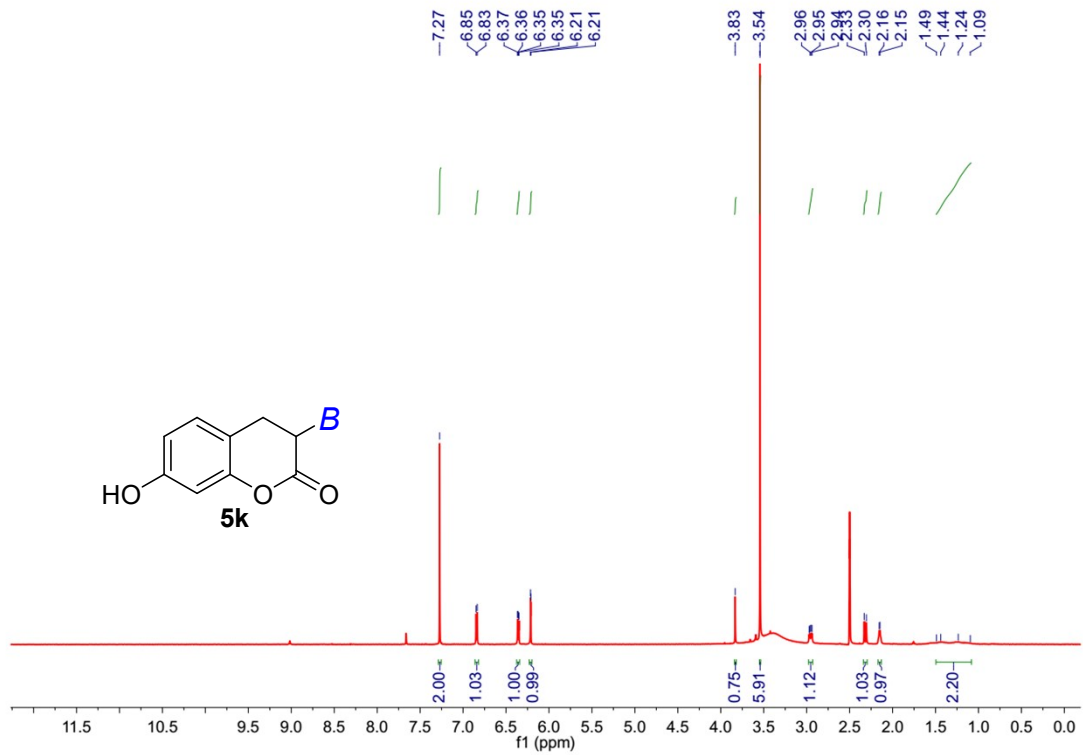

<sup>1</sup>H NMR (600 MHz, DMSO-*d*<sub>6</sub>)

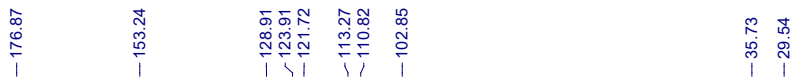

<sup>13</sup>C NMR (151 MHz, DMSO-*d*<sub>6</sub>)



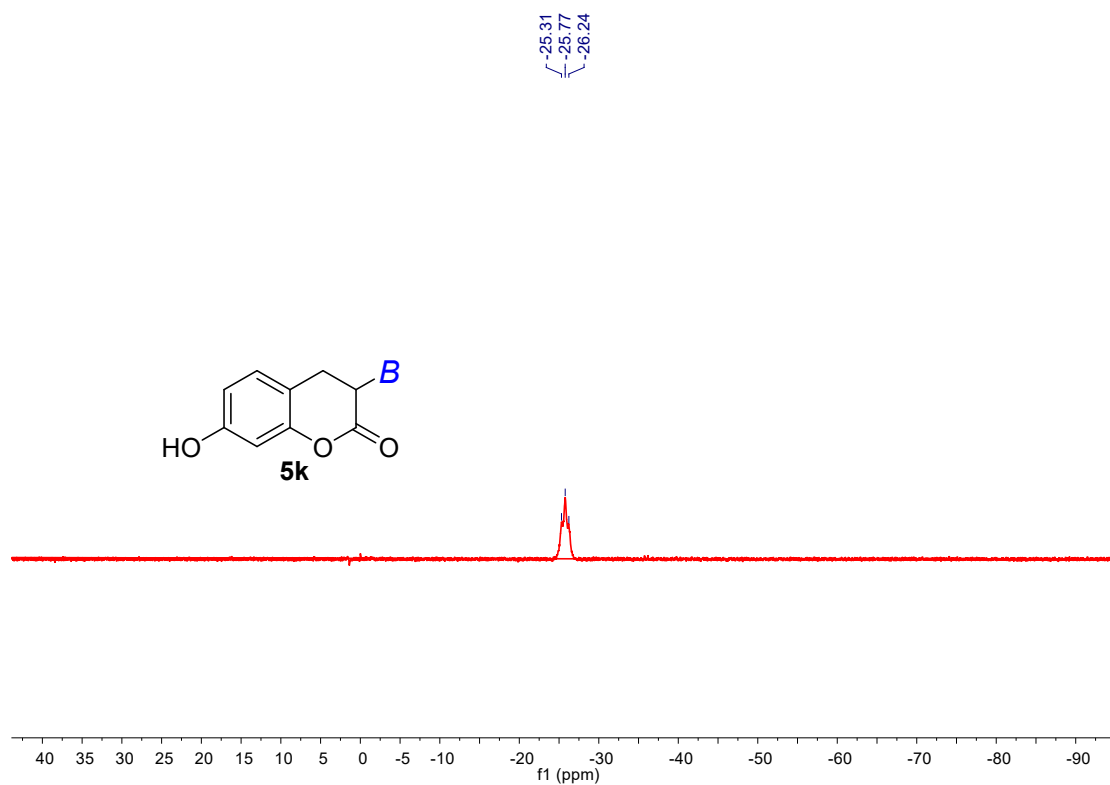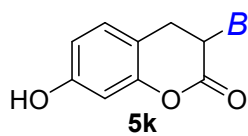

<sup>11</sup>B NMR (193 MHz, DMSO-*d*<sub>6</sub>)

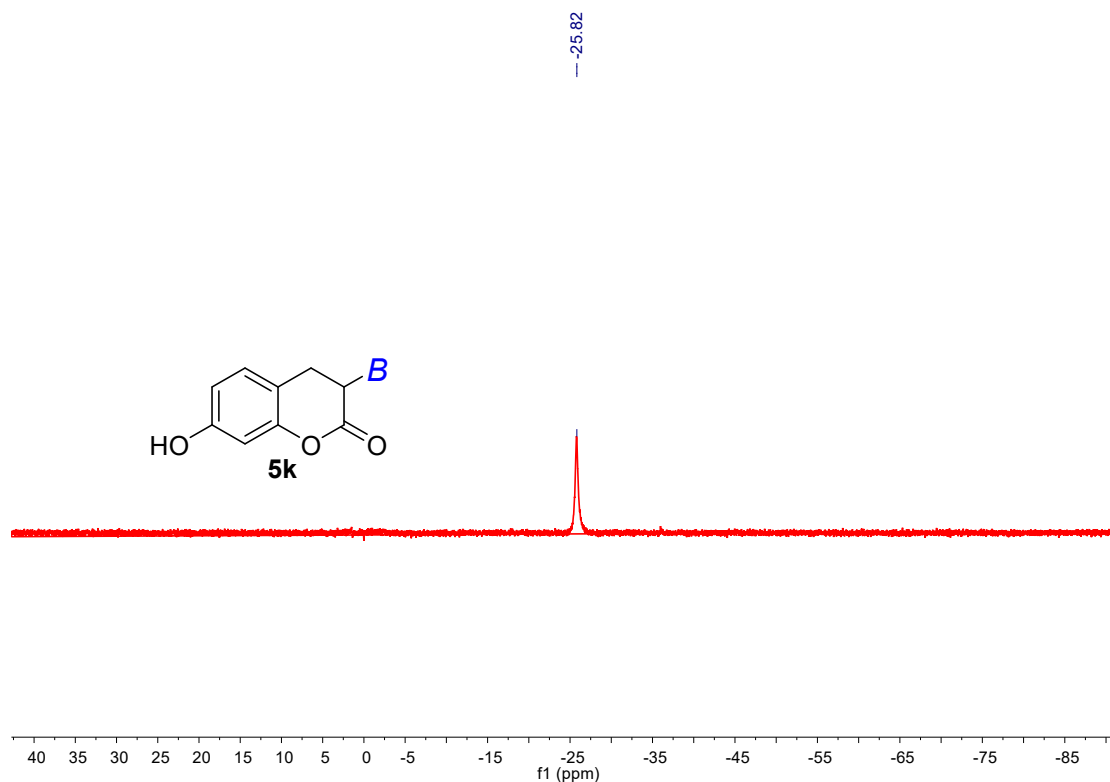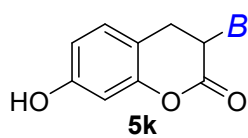

<sup>11</sup>B{<sup>1</sup>H} NMR (193 MHz, DMSO-*d*<sub>6</sub>)

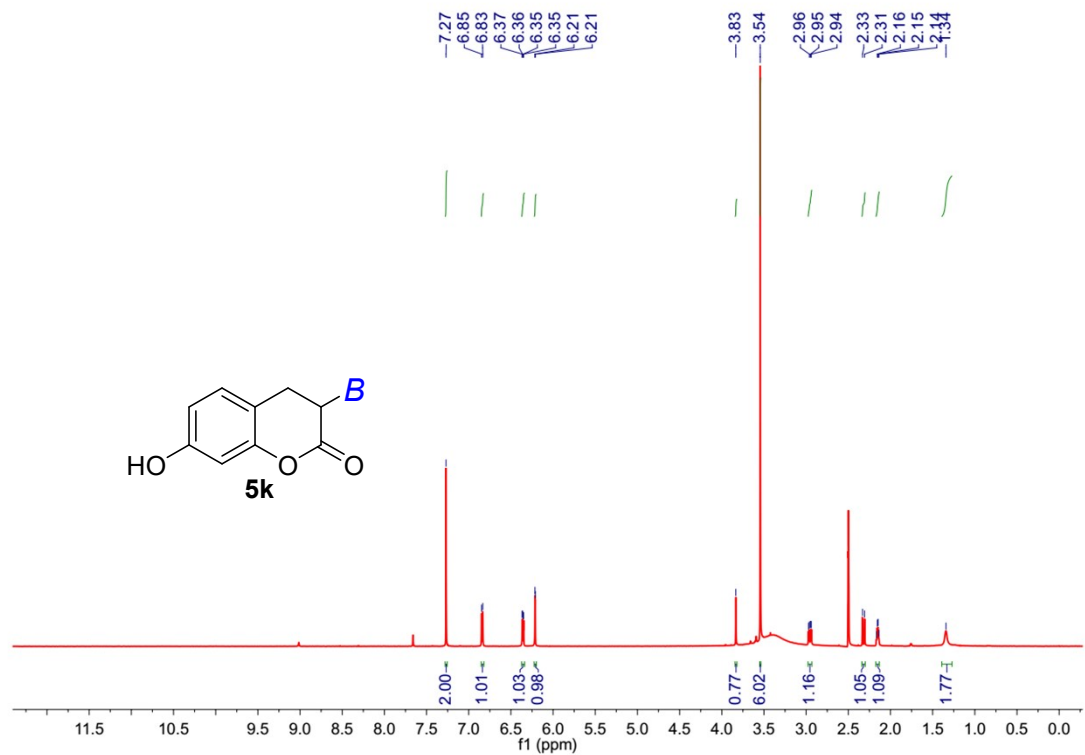

$^1\text{H}\{^{11}\text{B}\}$  NMR (600 MHz,  $\text{DMSO-}d_6$ )

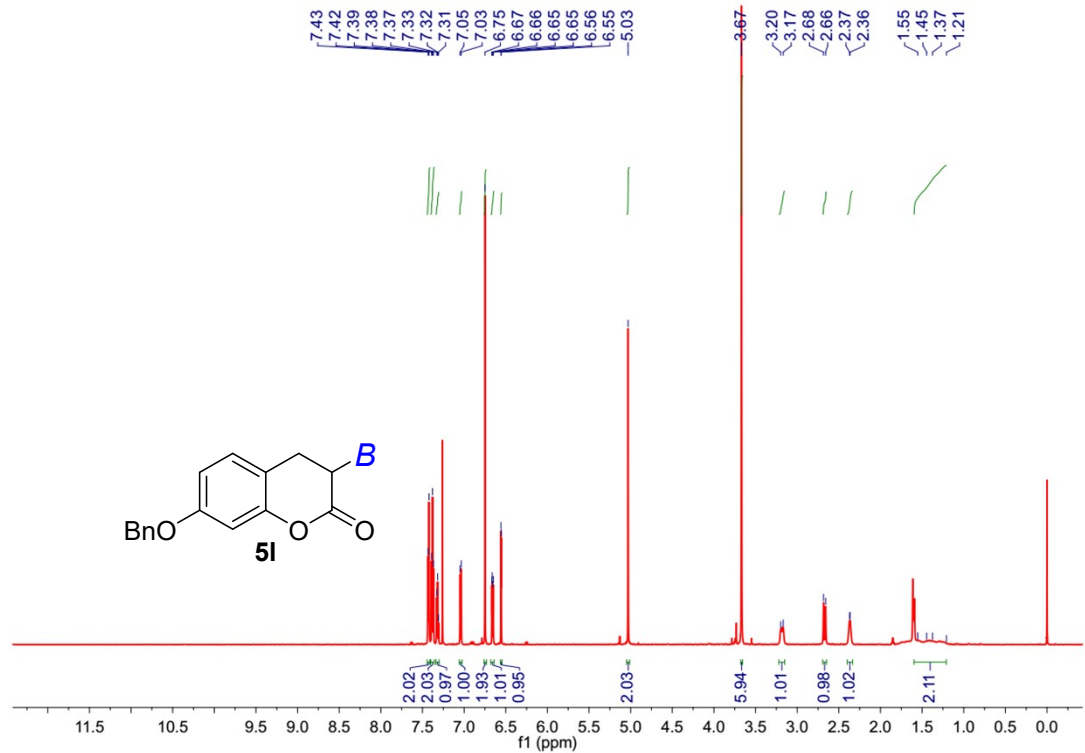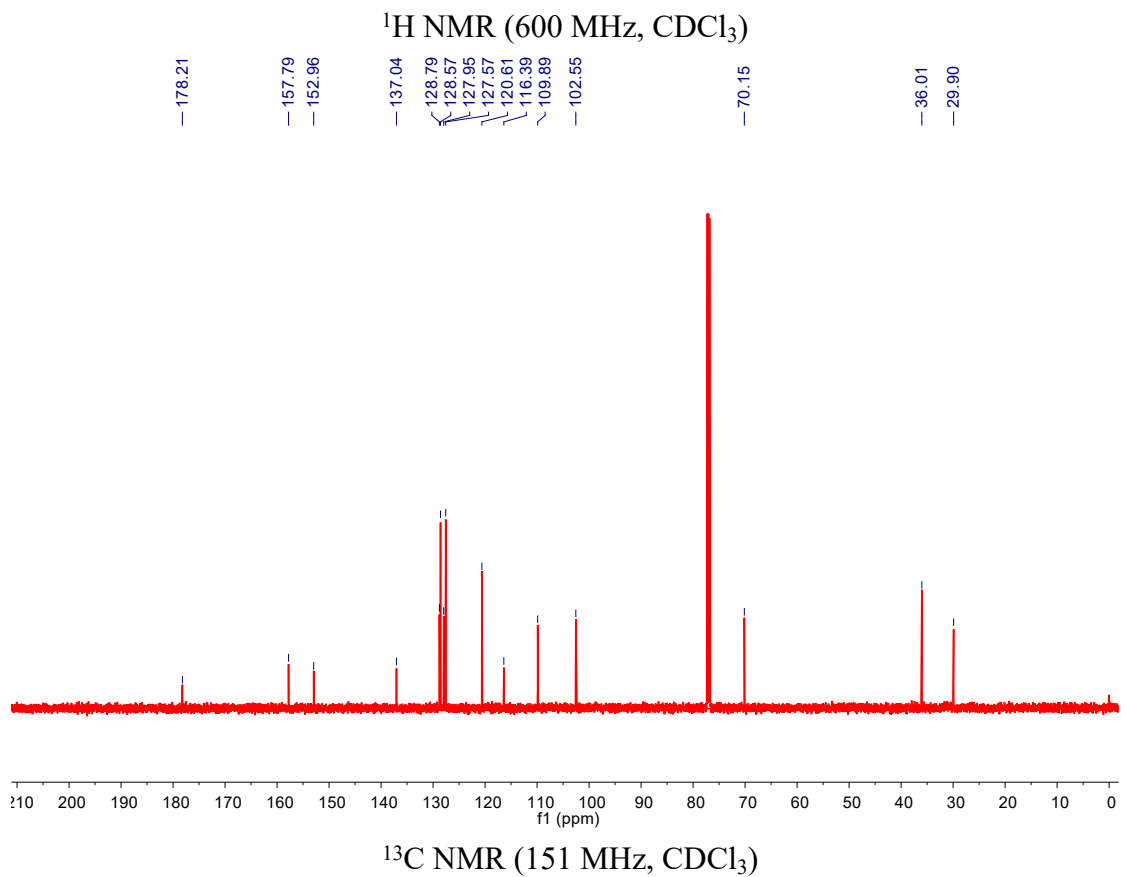

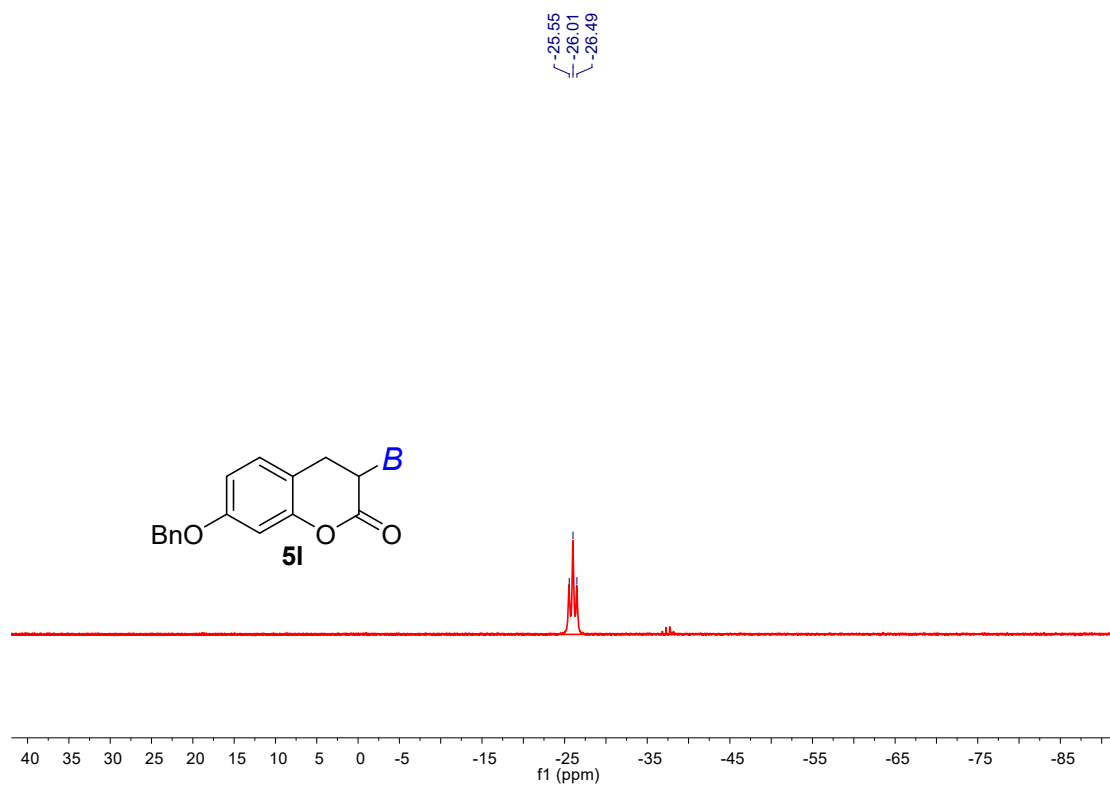

$^{11}\text{B}$  NMR (193 MHz,  $\text{CDCl}_3$ )

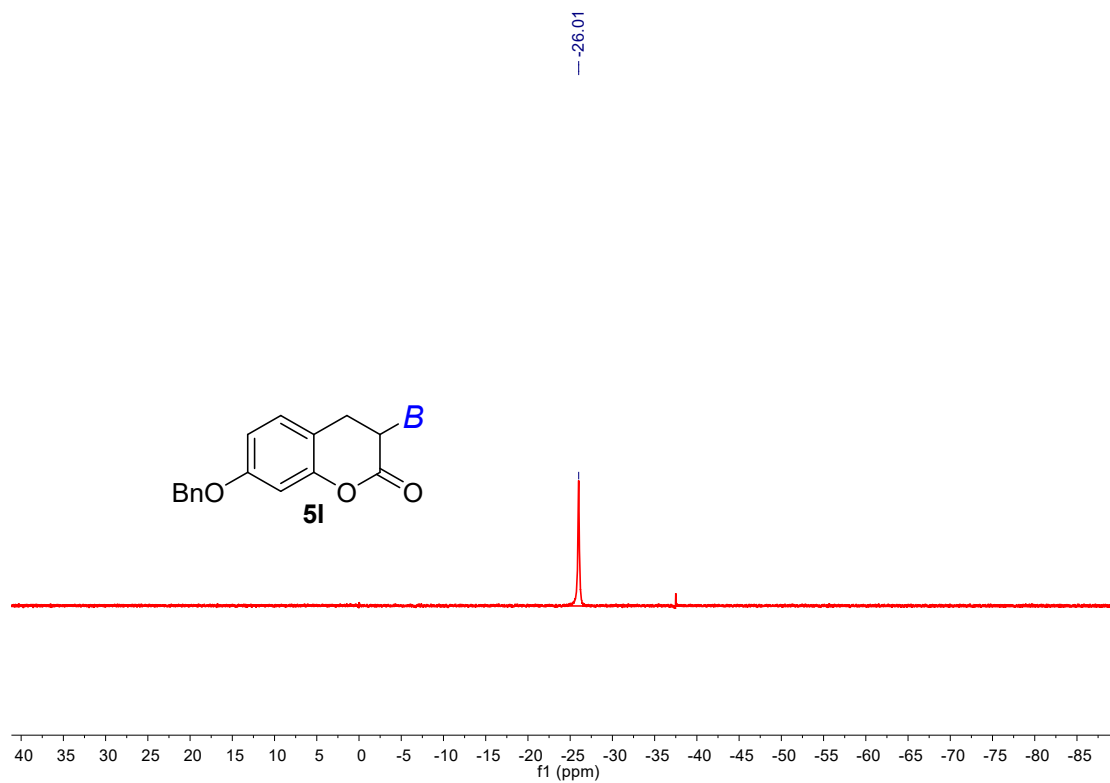

$^{11}\text{B}\{^1\text{H}\}$  NMR (193 MHz,  $\text{CDCl}_3$ )

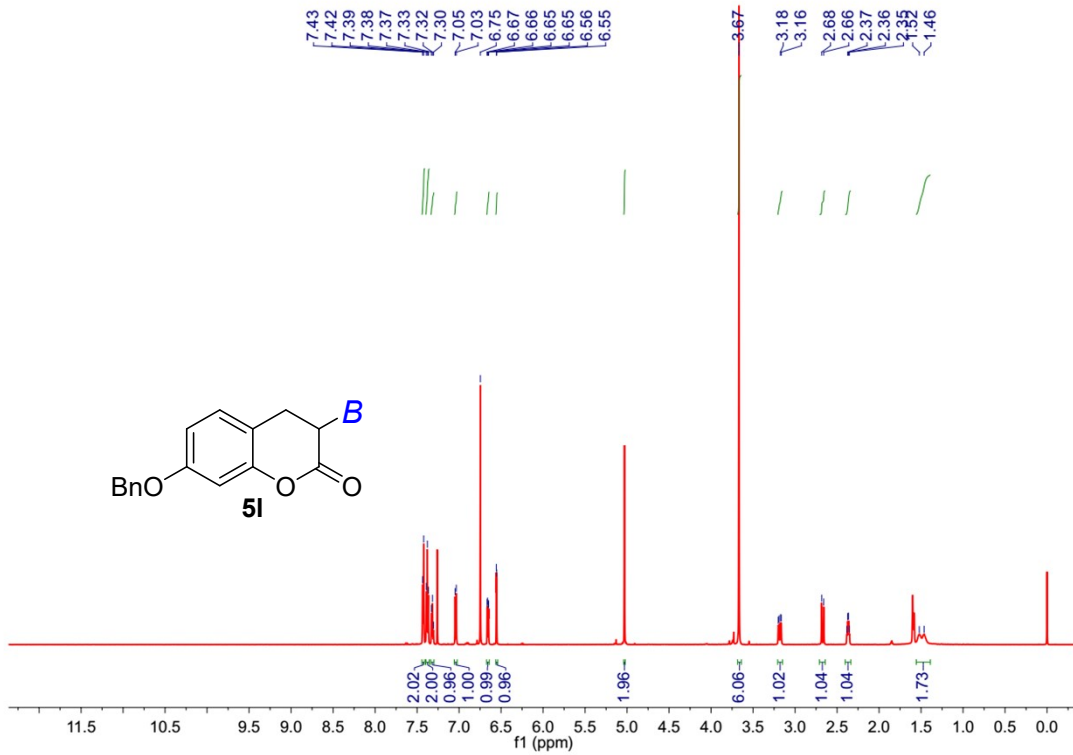

$^1\text{H}\{^{11}\text{B}\}$  NMR (600 MHz,  $\text{CDCl}_3$ )

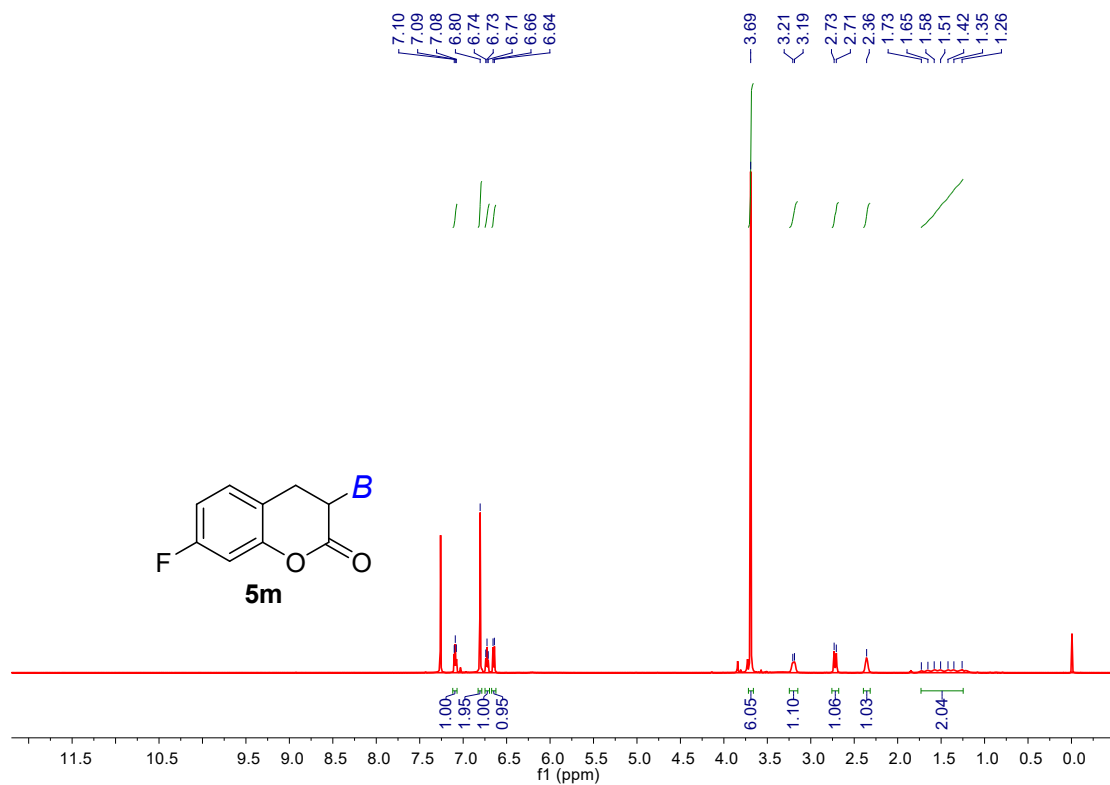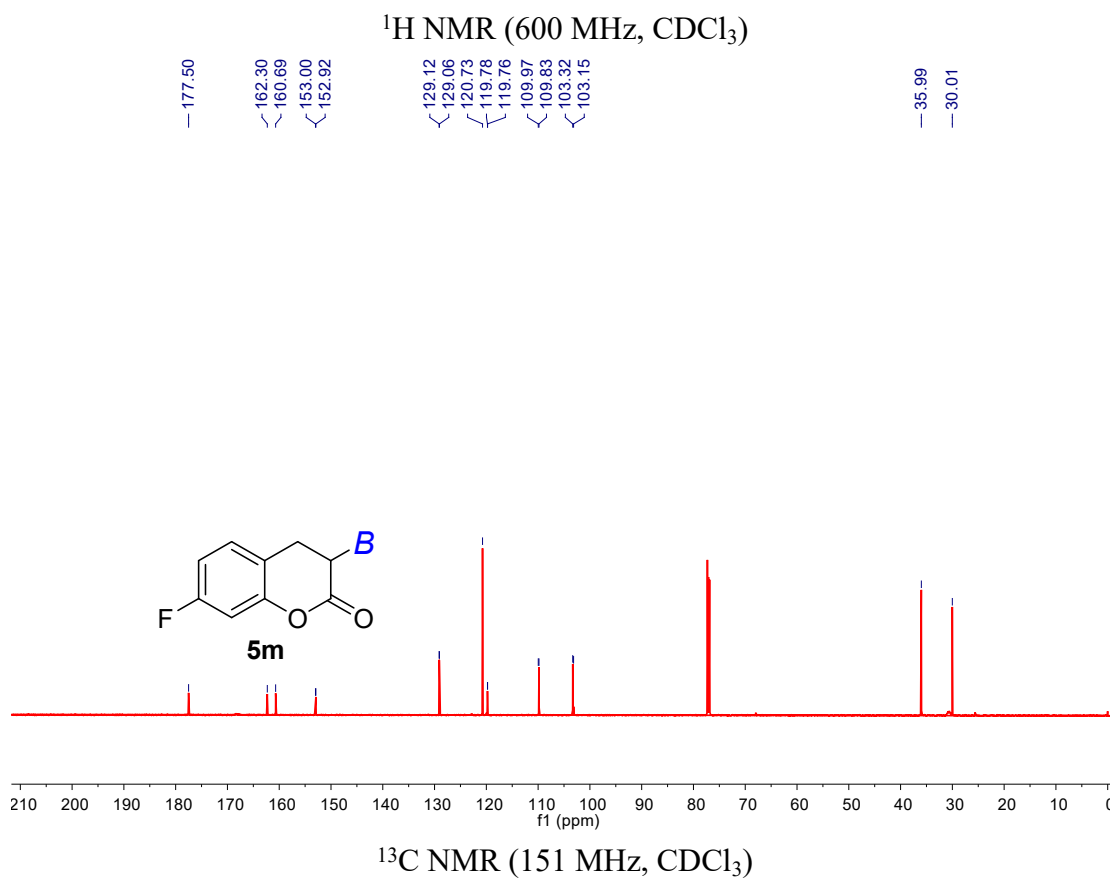

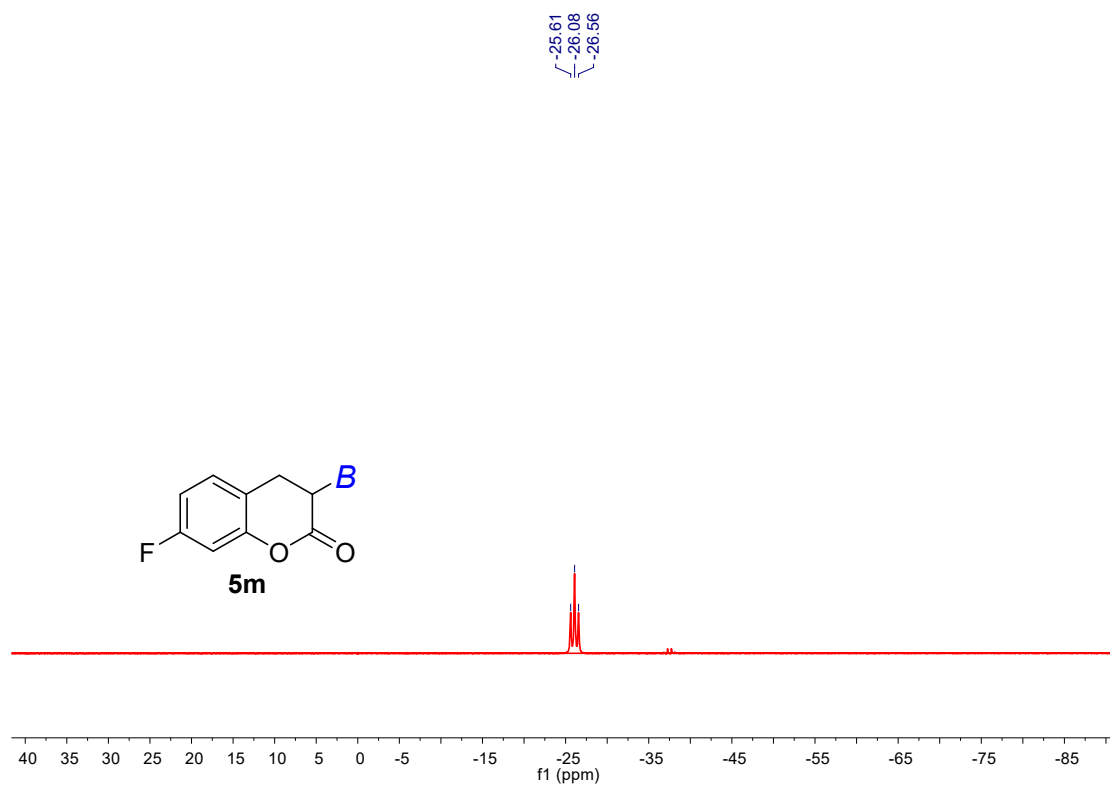

$^{11}\text{B}$  NMR (193 MHz,  $\text{CDCl}_3$ )

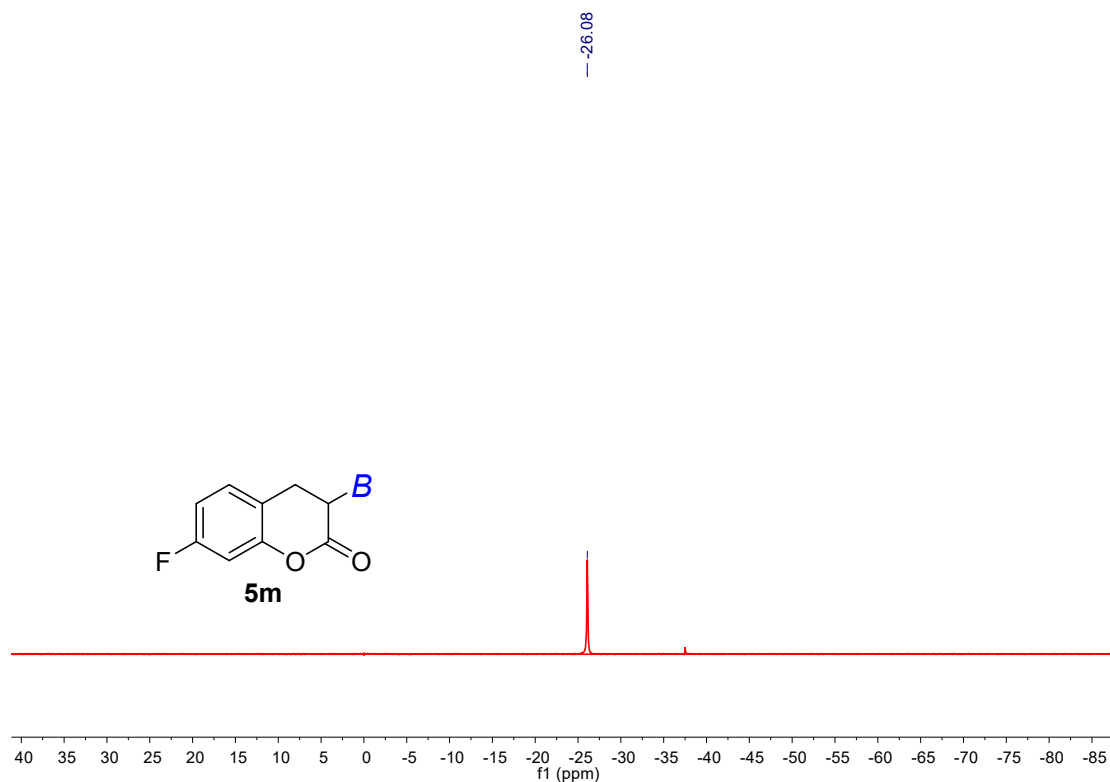

$^{11}\text{B}\{^1\text{H}\}$  NMR (193 MHz,  $\text{CDCl}_3$ )

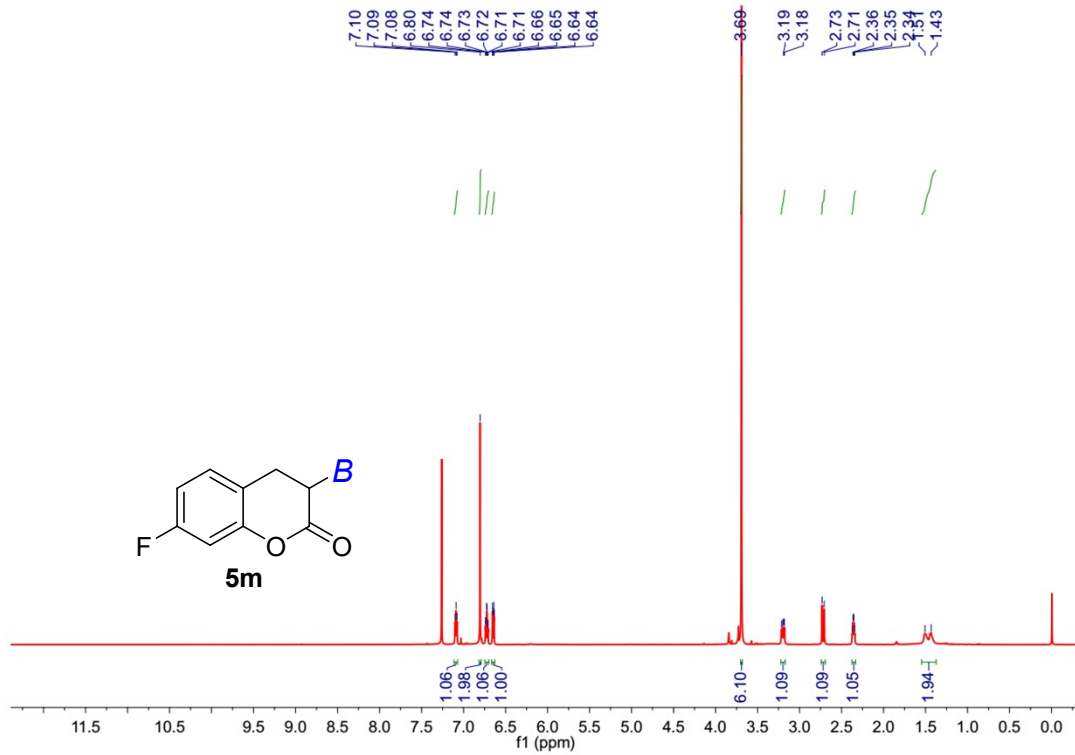

$^1\text{H}\{^{11}\text{B}\}$  NMR (600 MHz,  $\text{CDCl}_3$ )

---115.82

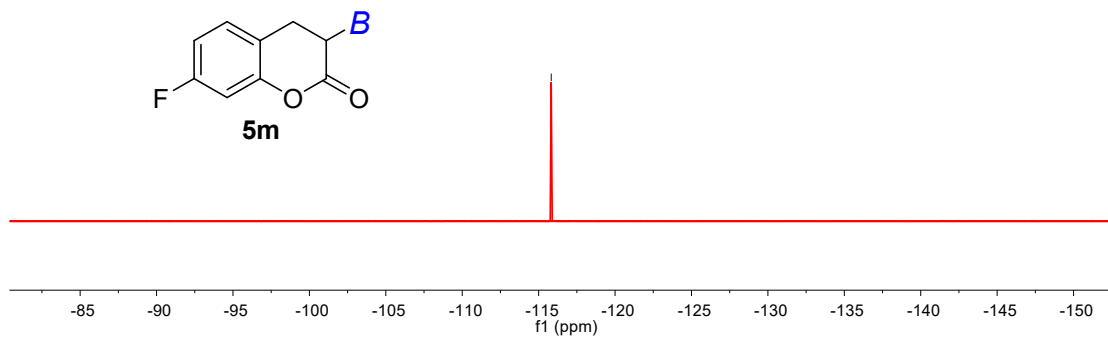

$^{19}\text{F}$  NMR (565 MHz,  $\text{CDCl}_3$ )



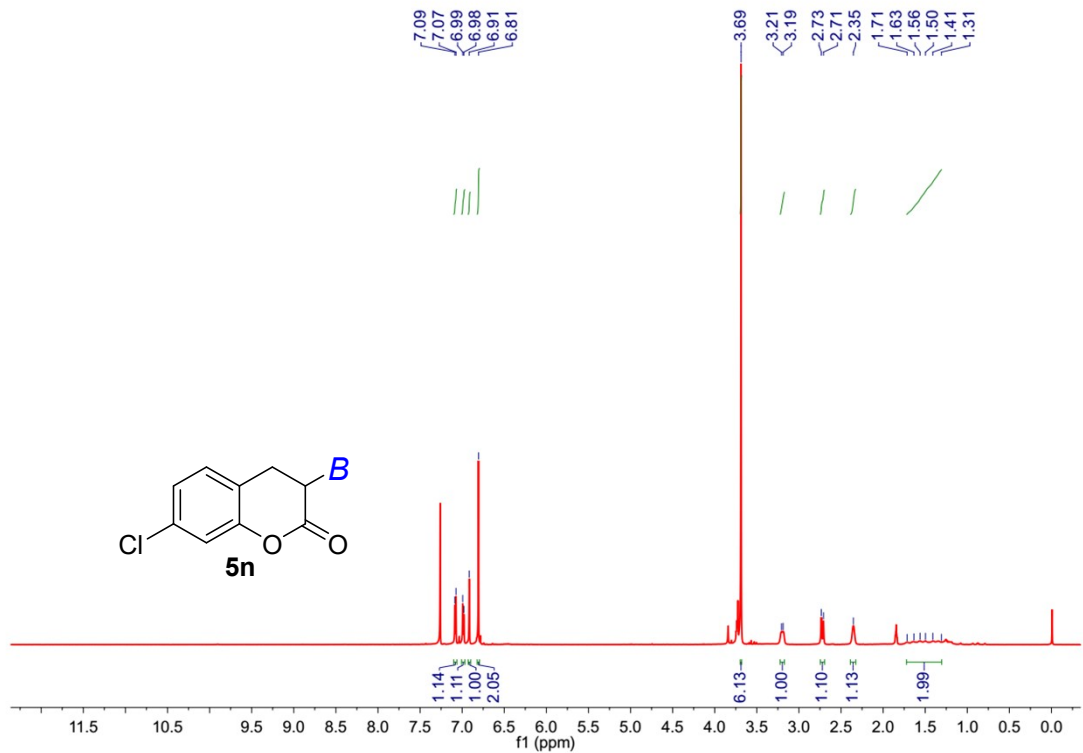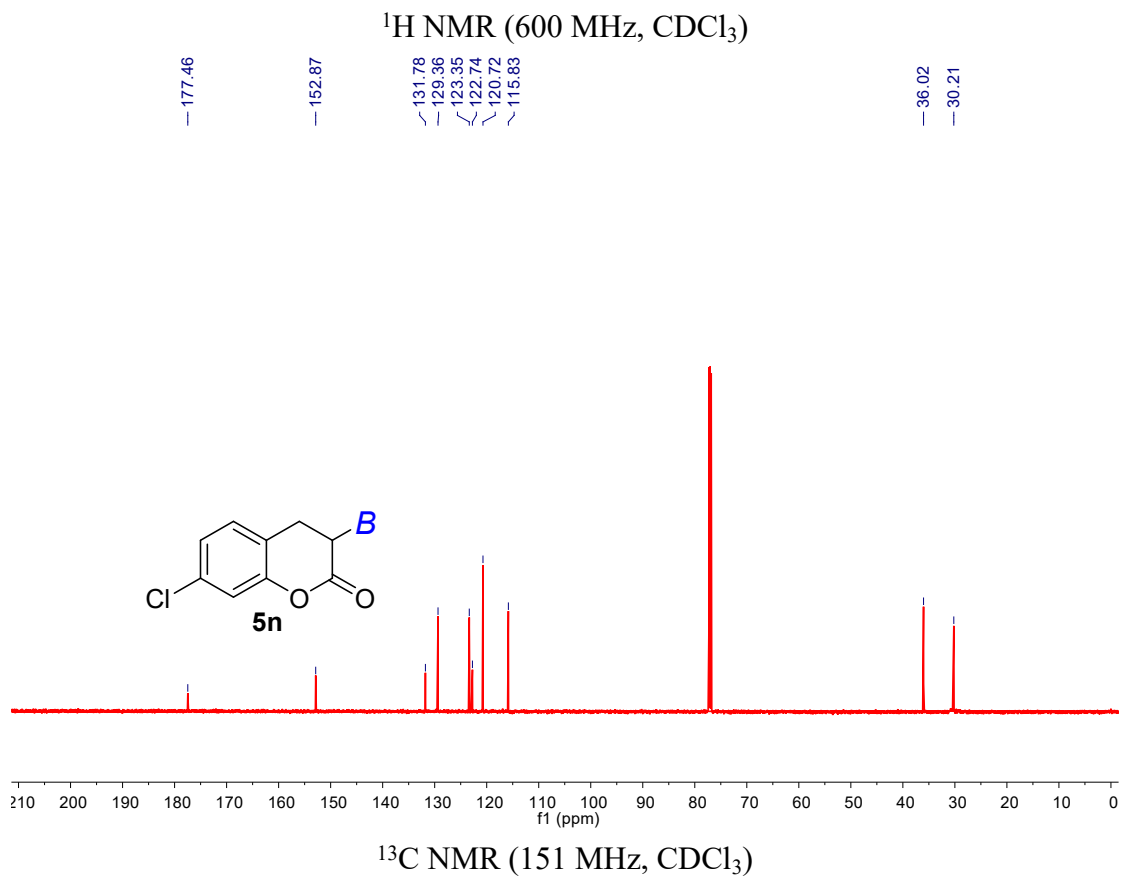

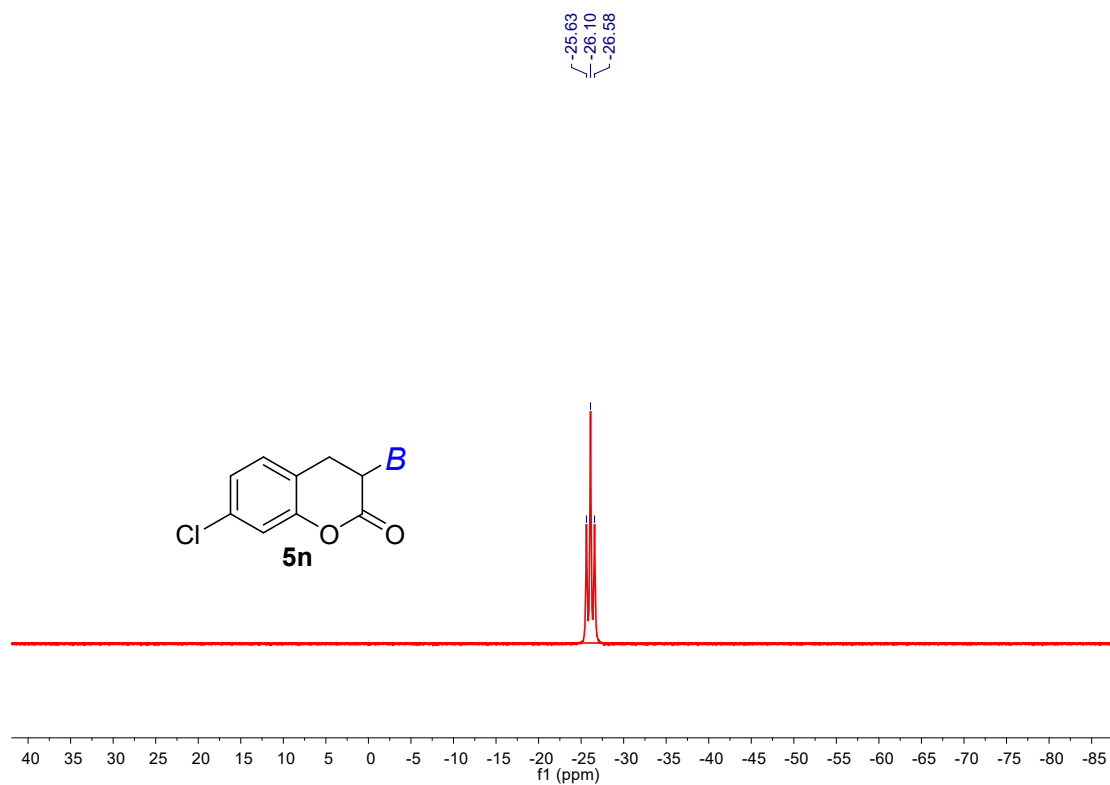

$^{11}\text{B}$  NMR (193 MHz,  $\text{CDCl}_3$ )

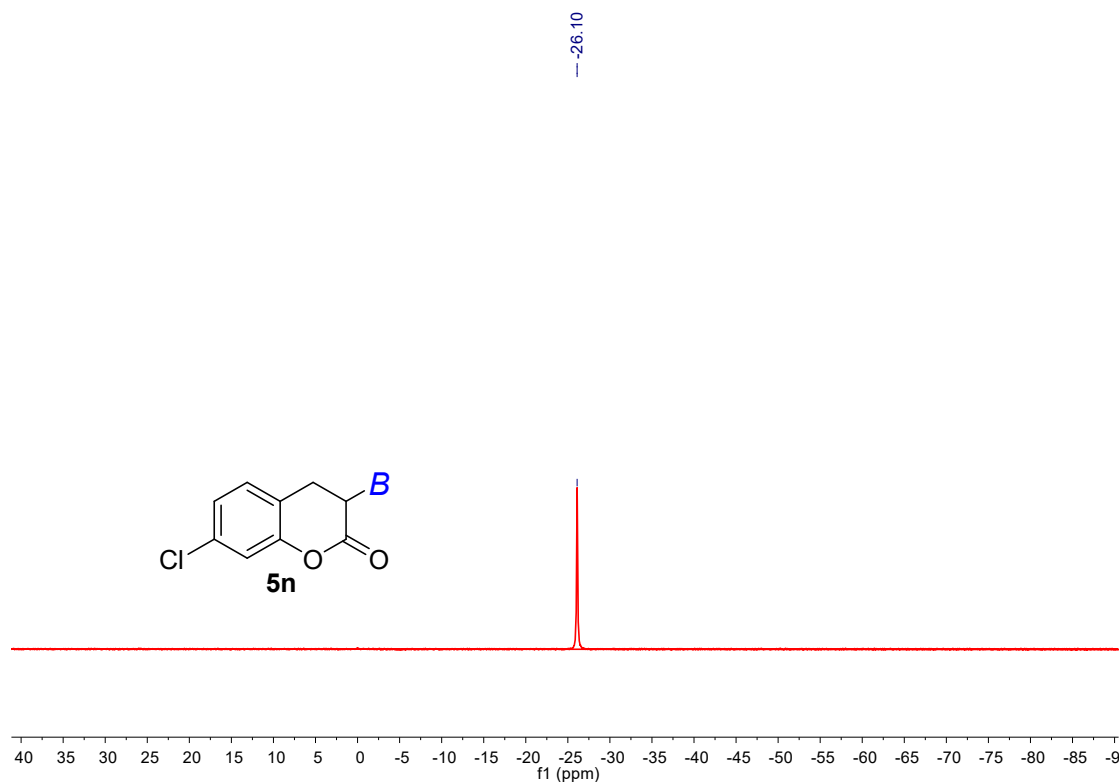

$^{11}\text{B}\{^1\text{H}\}$  NMR (193 MHz,  $\text{CDCl}_3$ )

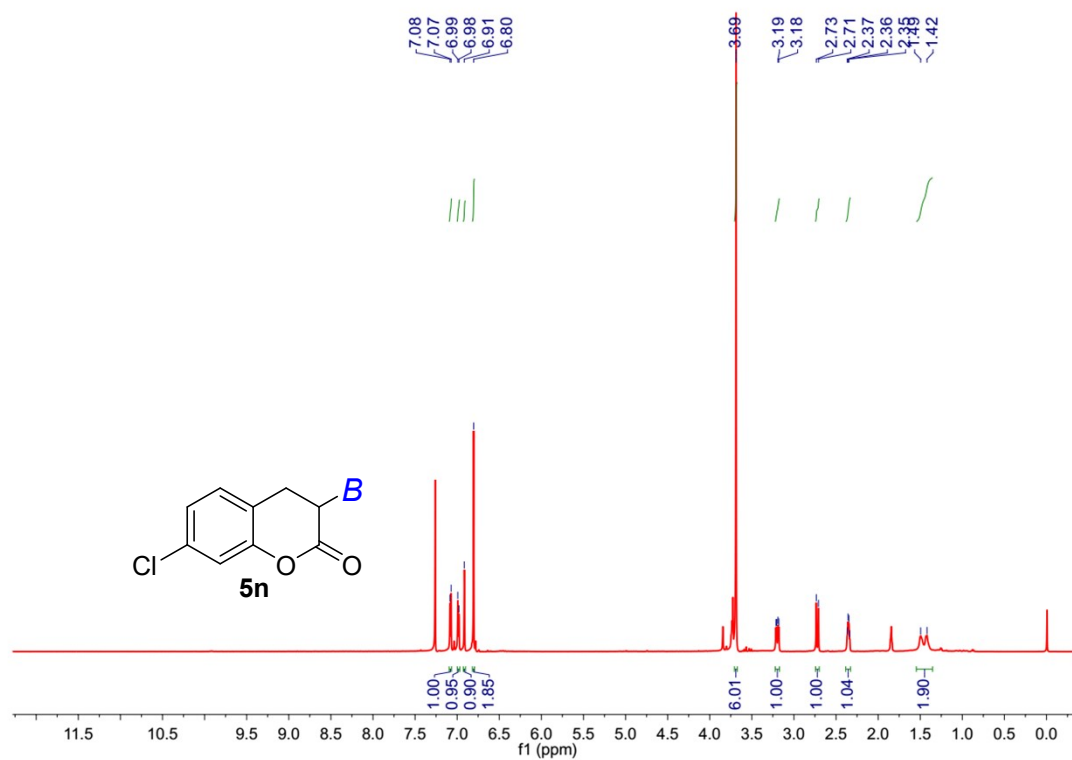

$^1\text{H}\{^{11}\text{B}\}$  NMR (600 MHz,  $\text{CDCl}_3$ )

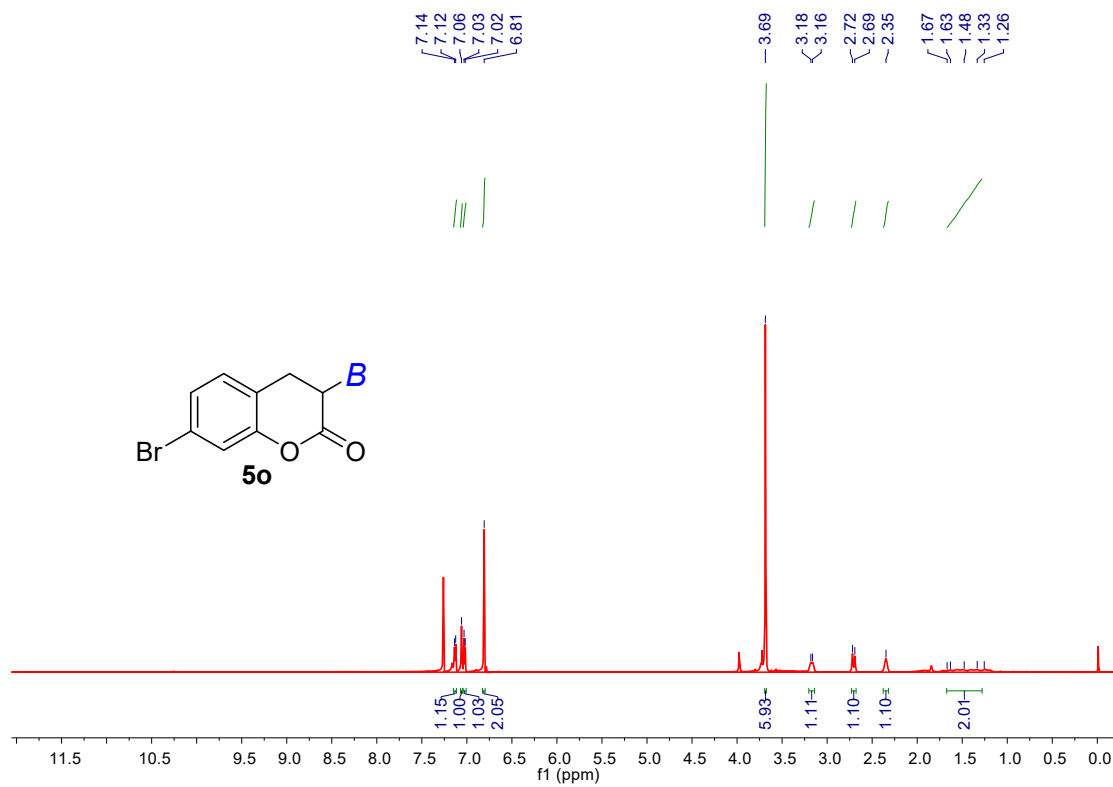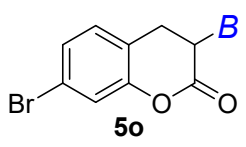

**<sup>1</sup>H NMR (600 MHz, CDCl<sub>3</sub>)**

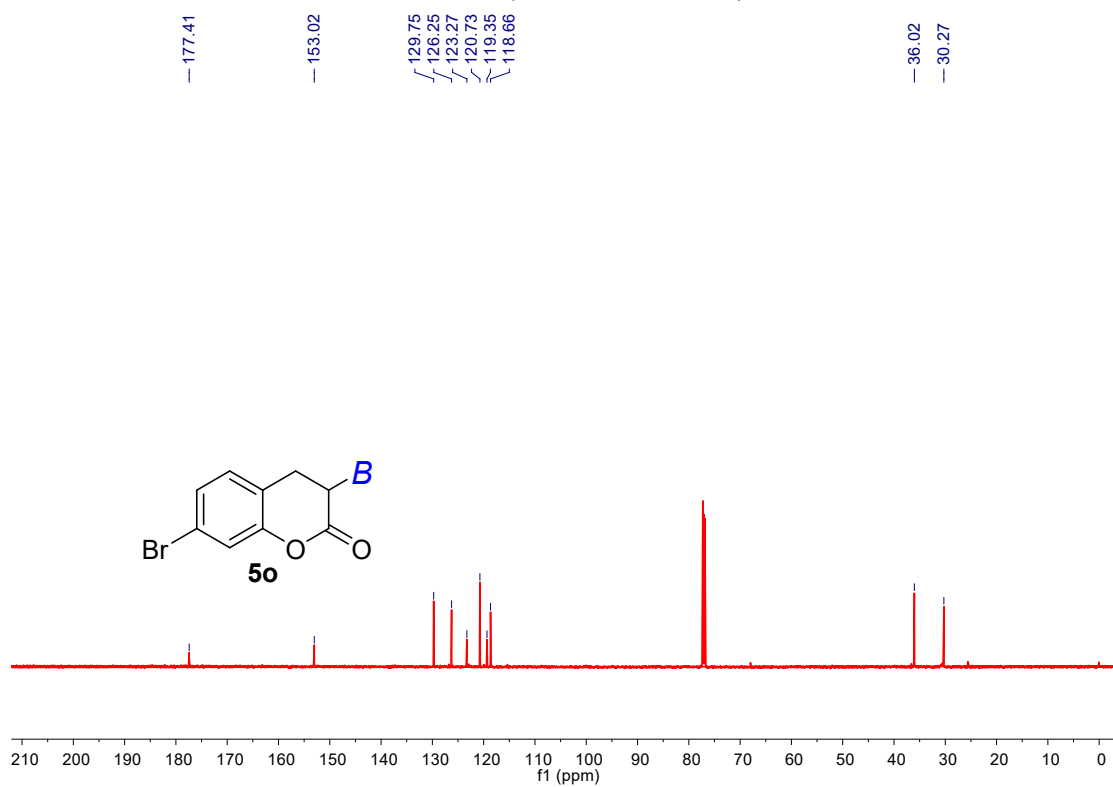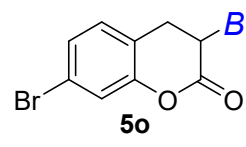

**<sup>13</sup>C NMR (151 MHz, CDCl<sub>3</sub>)**

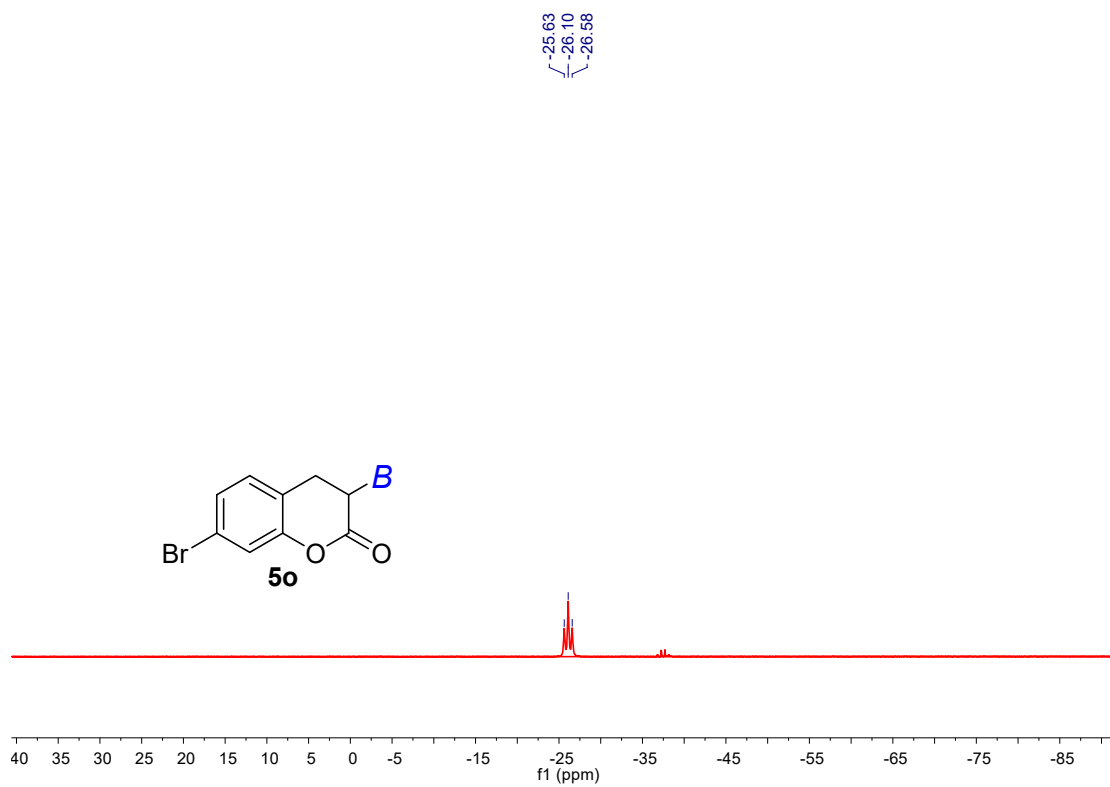

$^{11}\text{B}$  NMR (193 MHz,  $\text{CDCl}_3$ )

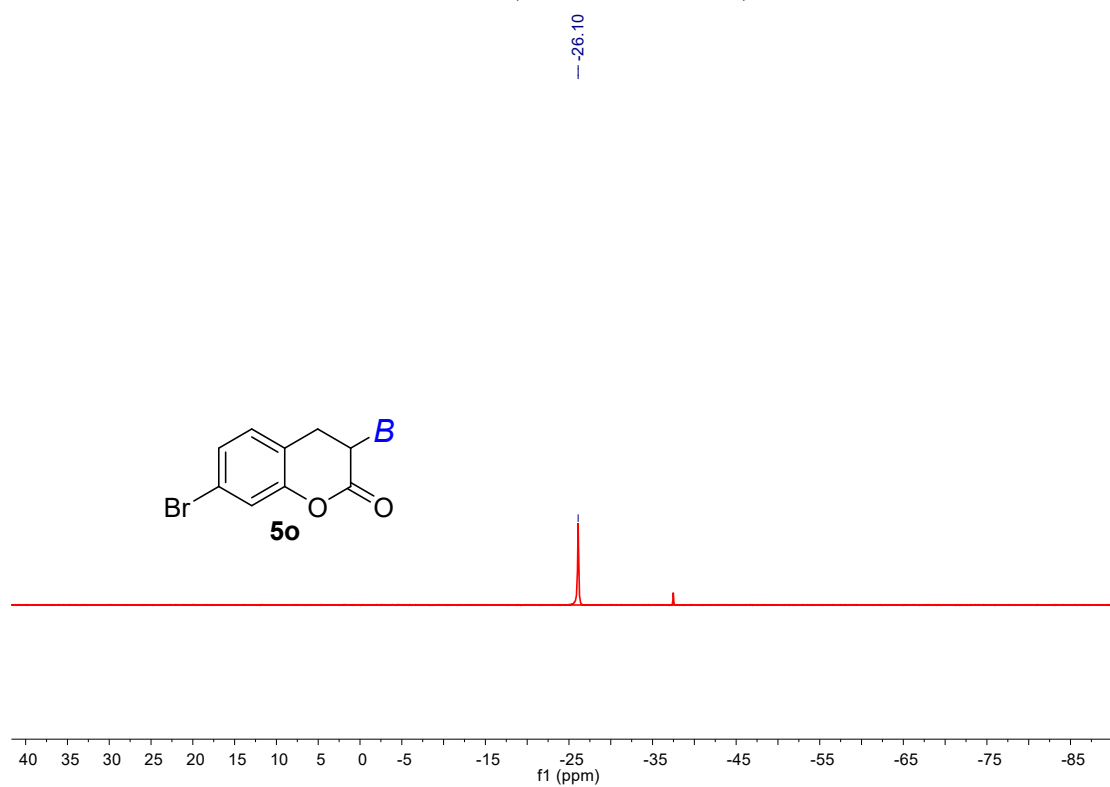

$^{11}\text{B}\{^1\text{H}\}$  NMR (193 MHz,  $\text{CDCl}_3$ )

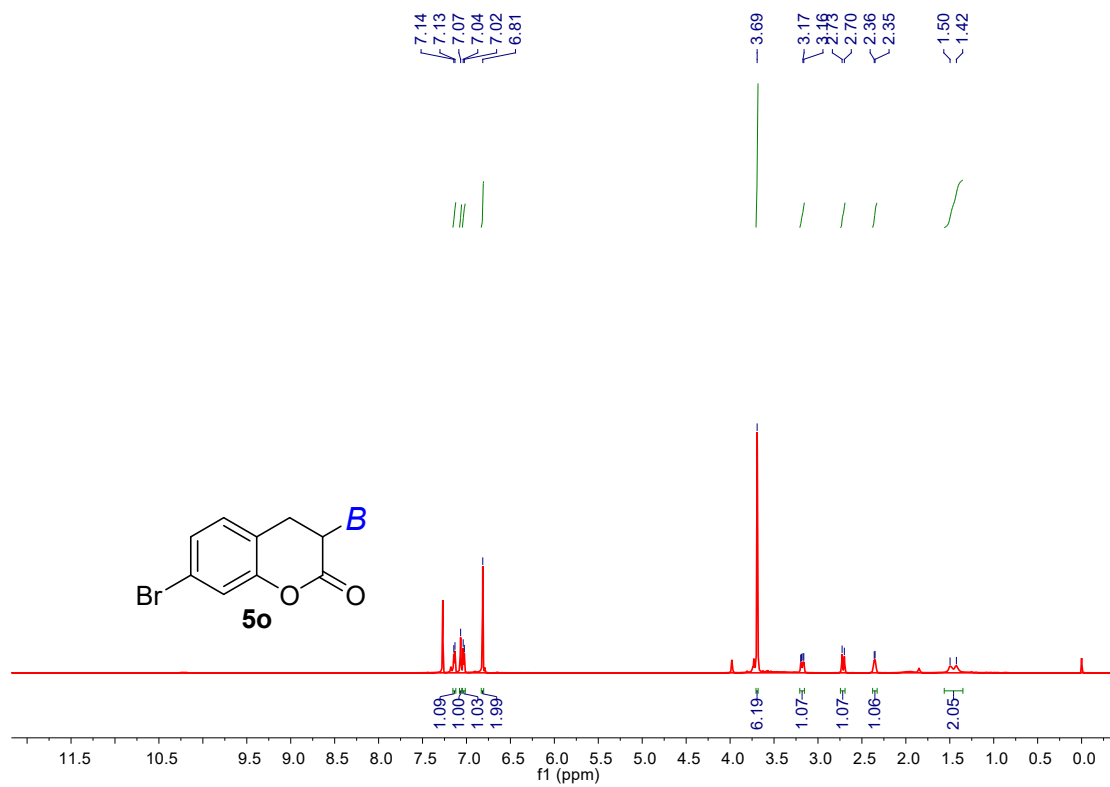

$^1\text{H}\{^{11}\text{B}\}$  NMR (600 MHz,  $\text{CDCl}_3$ )

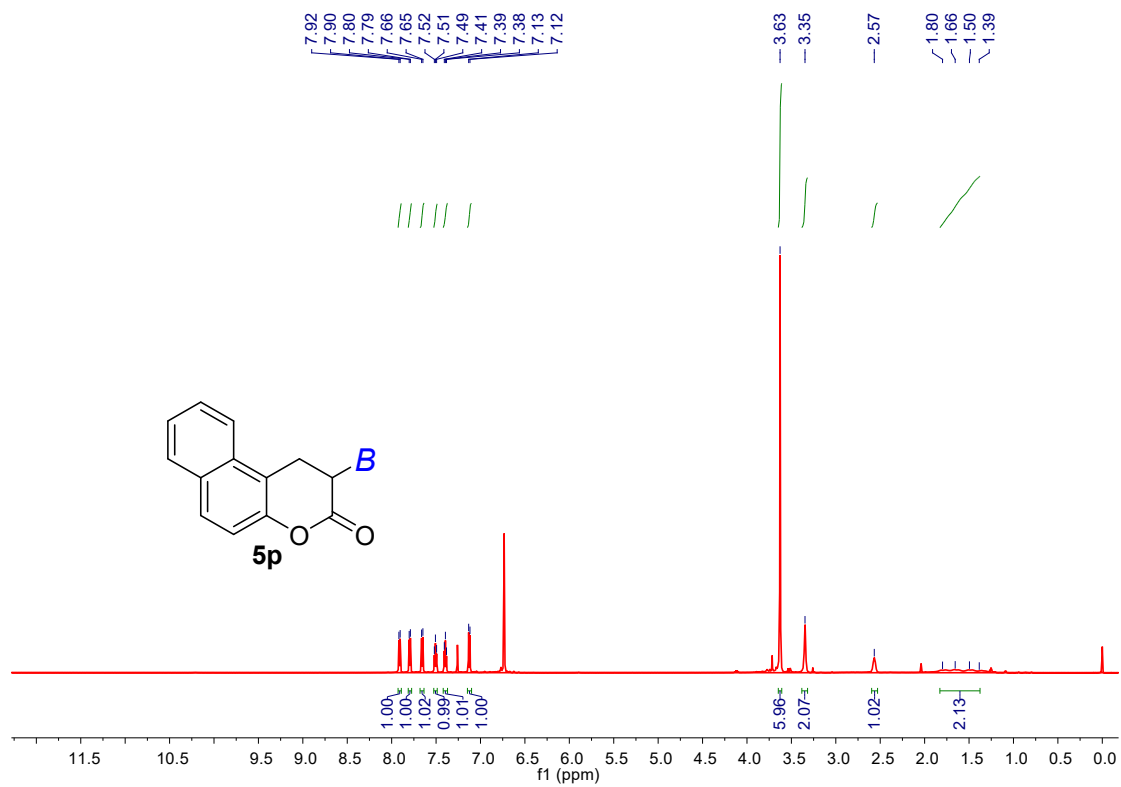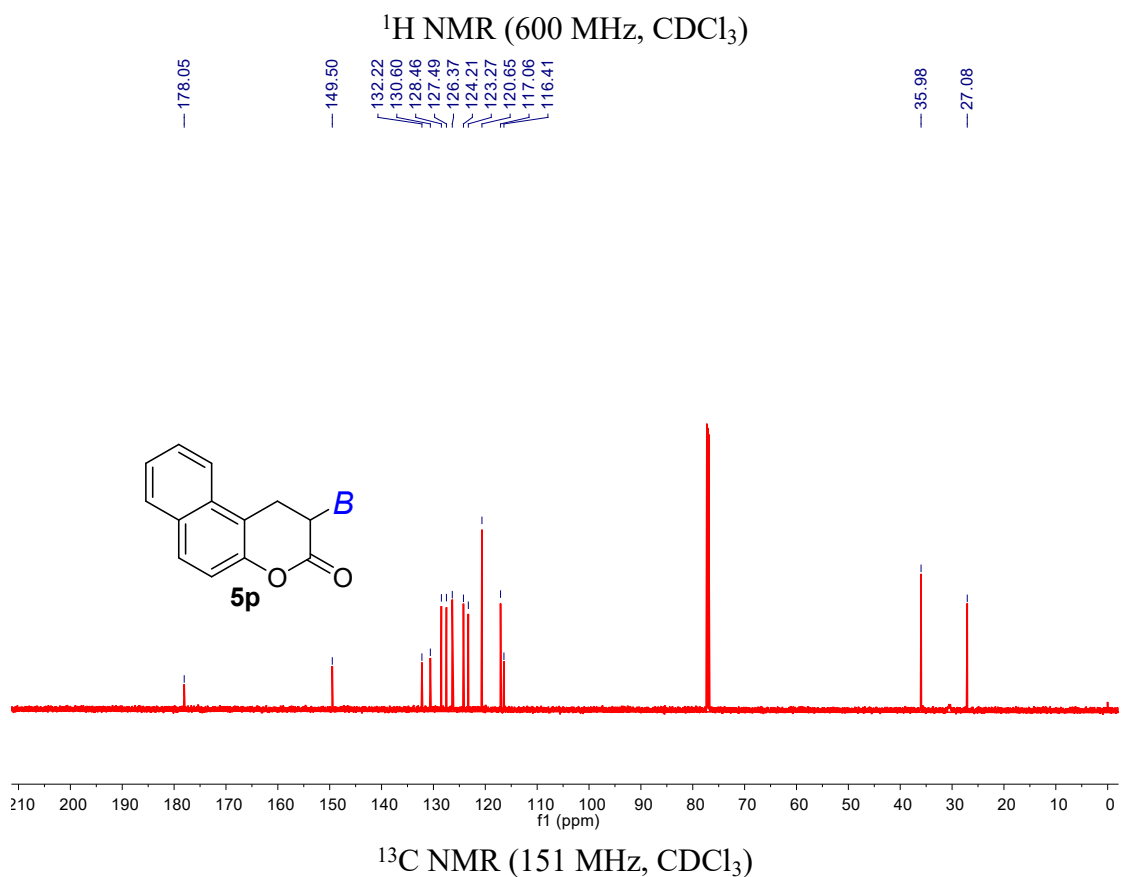

-24.98  
-25.46  
-25.93

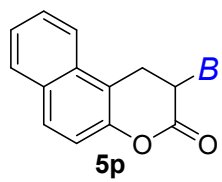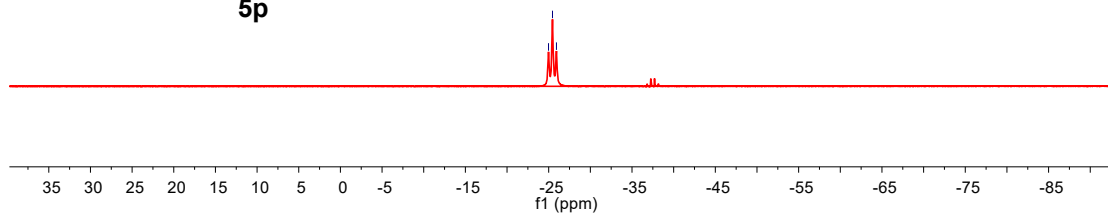

$^{11}\text{B}$  NMR (193 MHz,  $\text{CDCl}_3$ )

-25.45

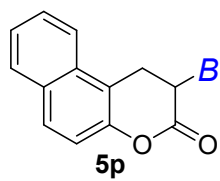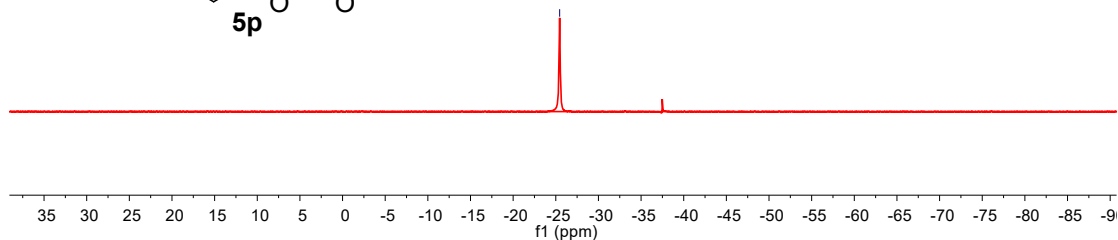

$^{11}\text{B}\{^1\text{H}\}$  NMR (193 MHz,  $\text{CDCl}_3$ )



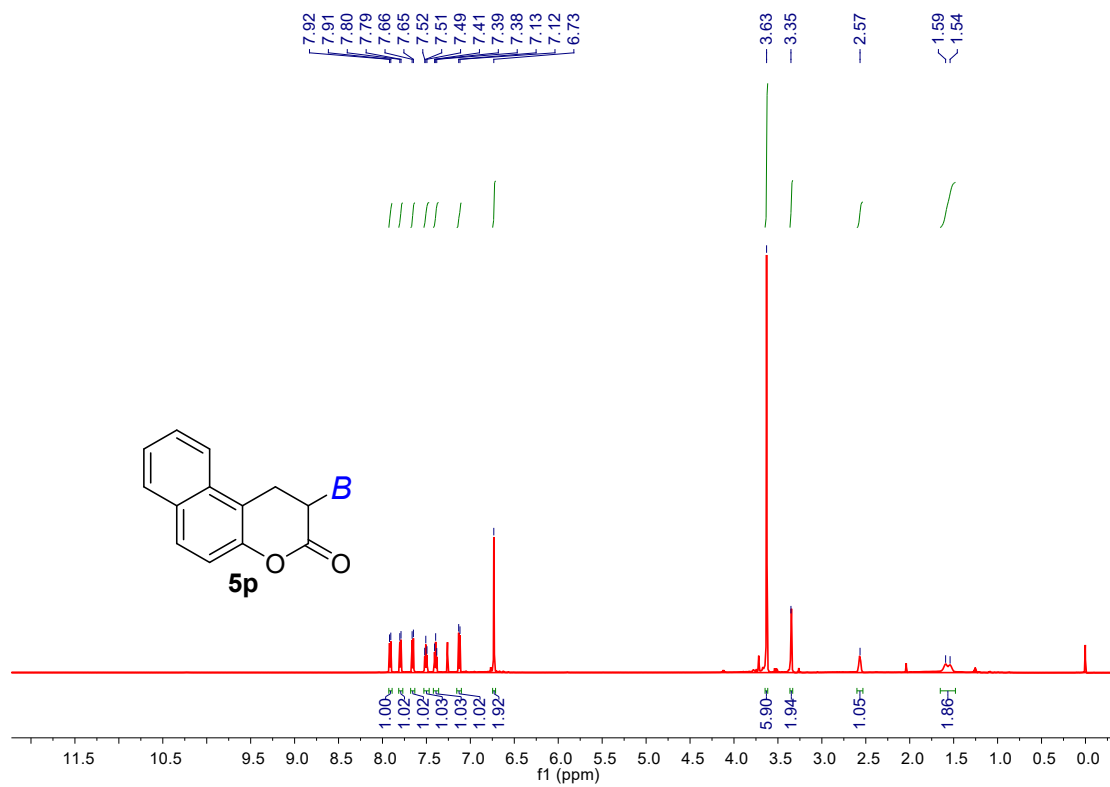

$^1\text{H}\{^{11}\text{B}\}$  NMR (600 MHz,  $\text{CDCl}_3$ )

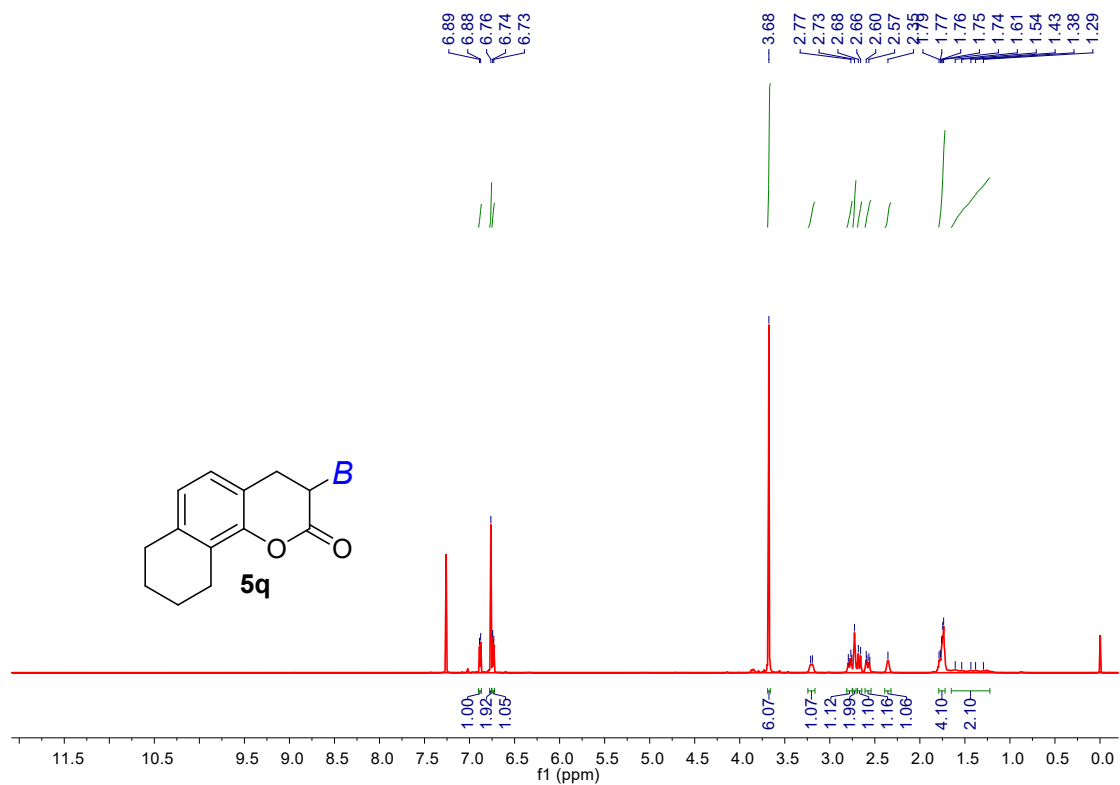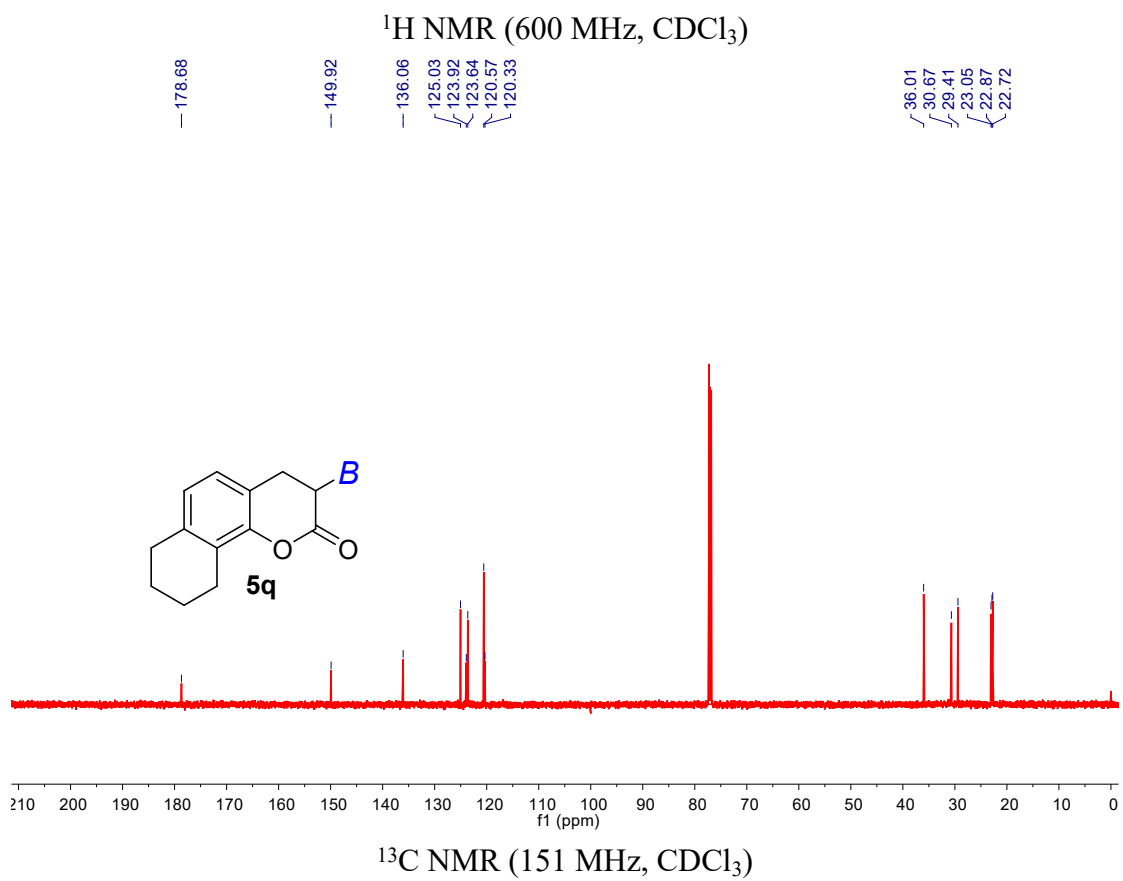

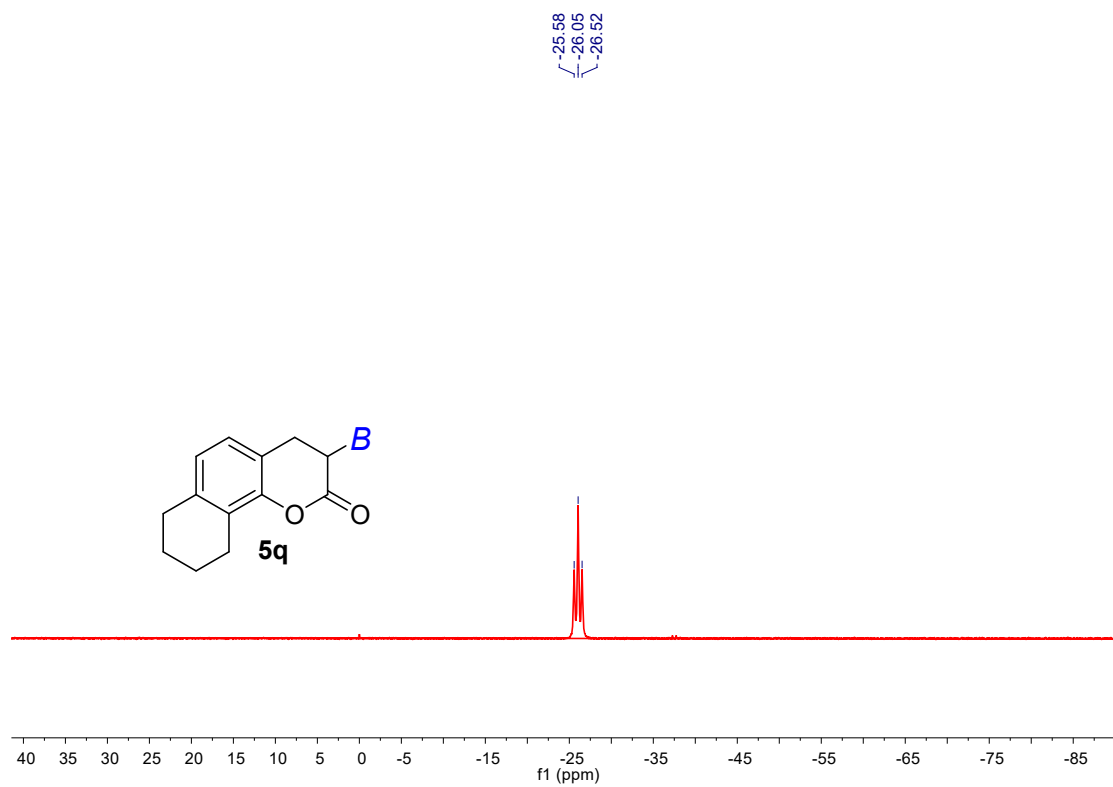

$^{11}\text{B}$  NMR (193 MHz,  $\text{CDCl}_3$ )

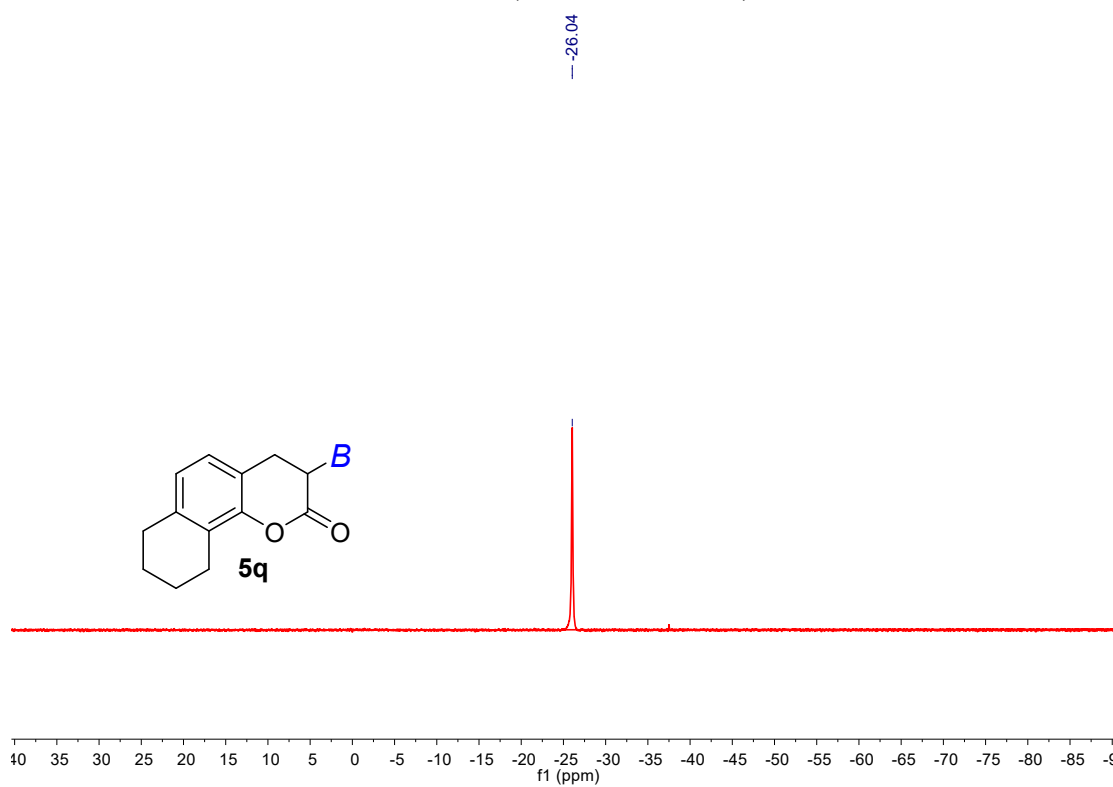

$^{11}\text{B}\{^1\text{H}\}$  NMR (193 MHz,  $\text{CDCl}_3$ )

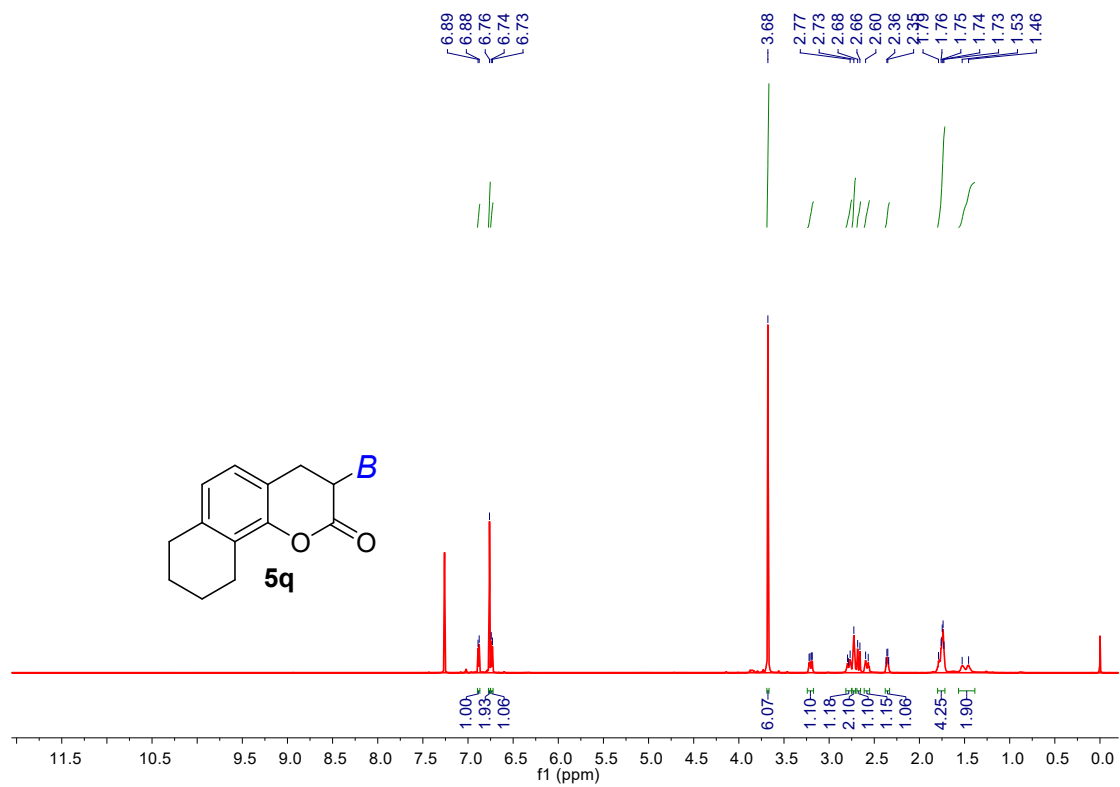

$^1\text{H}\{^{11}\text{B}\}$  NMR (600 MHz,  $\text{CDCl}_3$ )

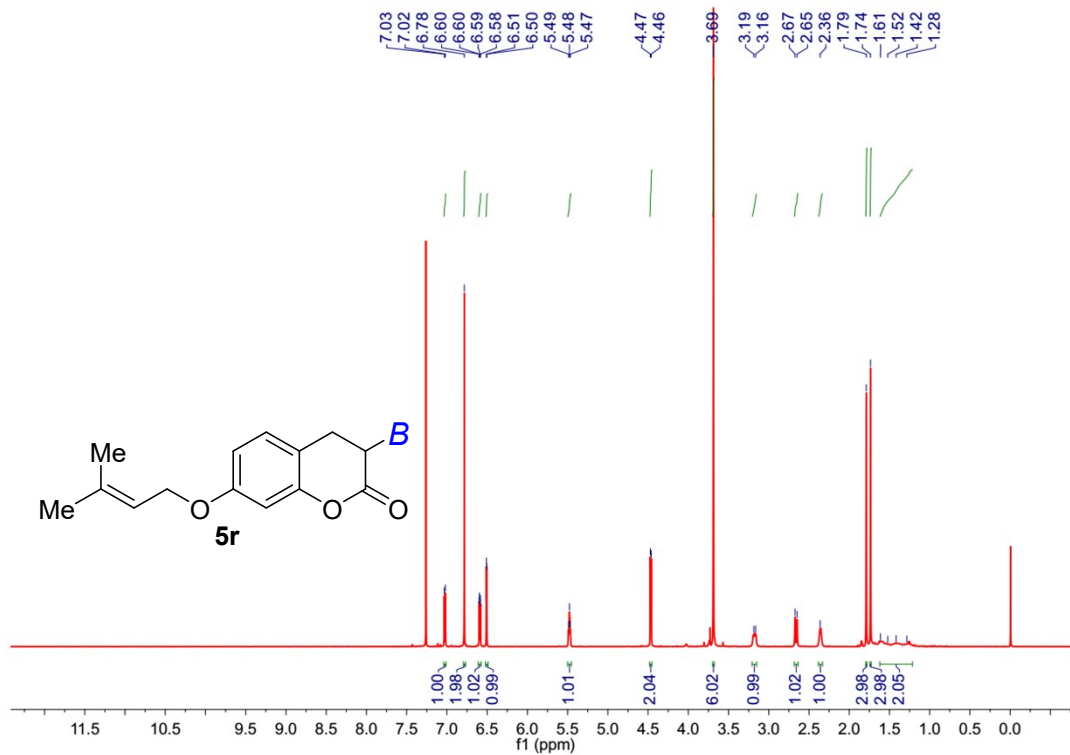

<sup>1</sup>H NMR (600 MHz, CDCl<sub>3</sub>)

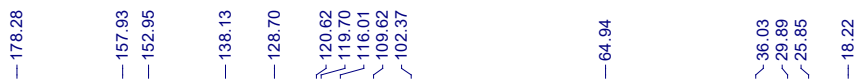

<sup>13</sup>C NMR (151 MHz, CDCl<sub>3</sub>)

-25.54  
-26.02  
-26.49

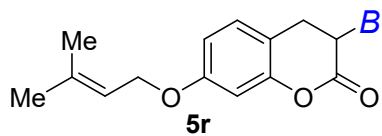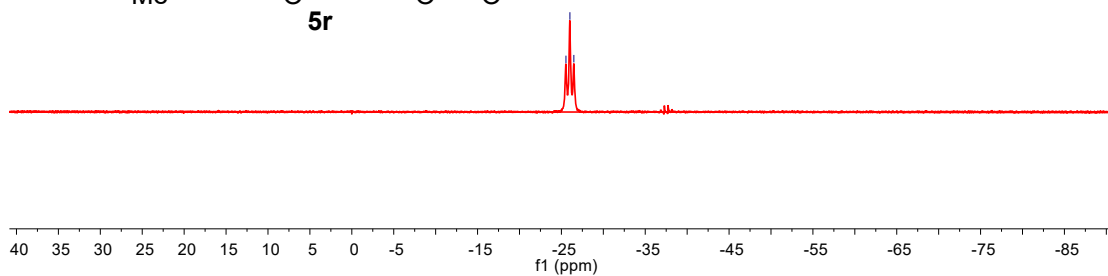

$^{11}\text{B}$  NMR (193 MHz,  $\text{CDCl}_3$ )

-26.00

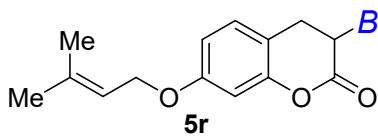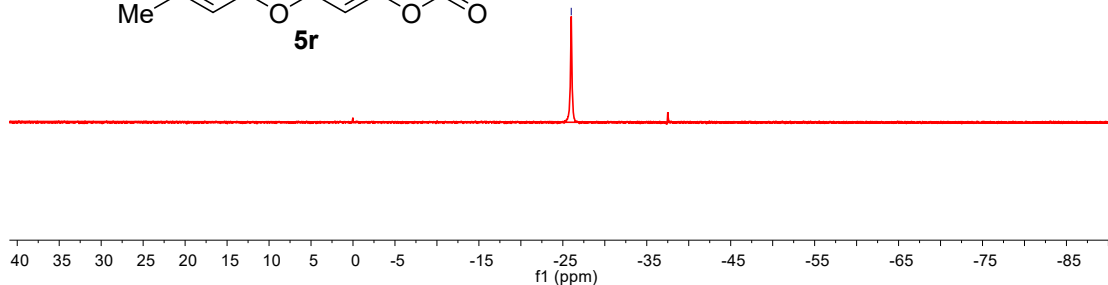

$^{11}\text{B}\{^1\text{H}\}$  NMR (193 MHz,  $\text{CDCl}_3$ )

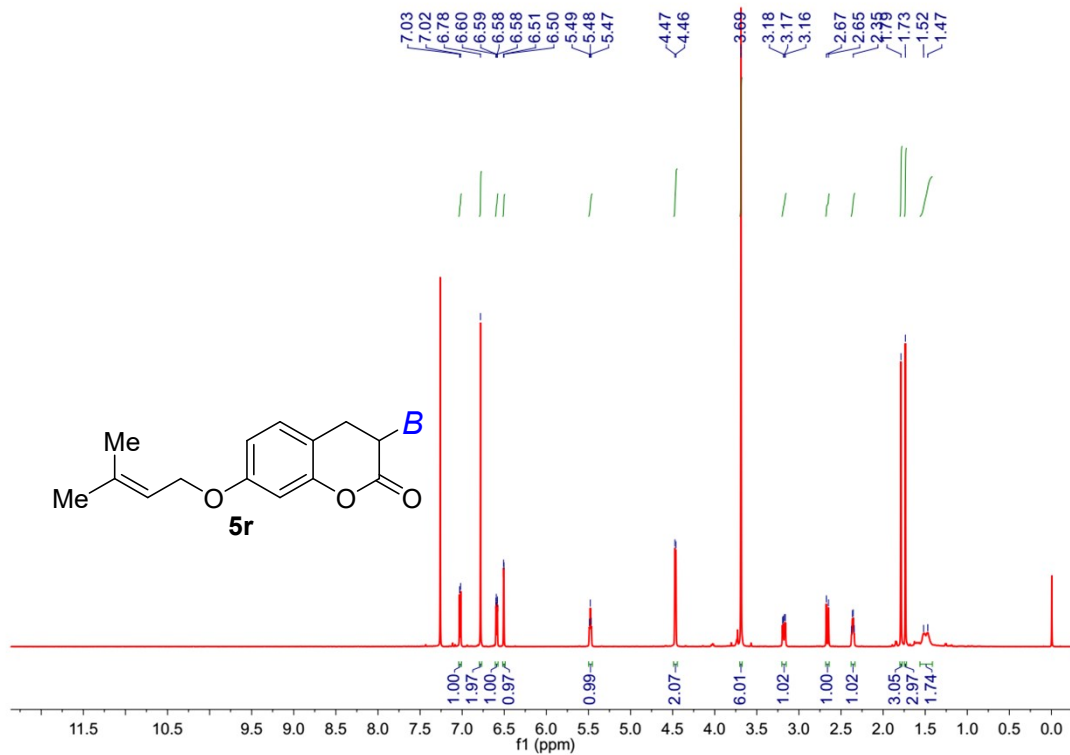

$^1\text{H}\{^{11}\text{B}\}$  NMR (600 MHz,  $\text{CDCl}_3$ )

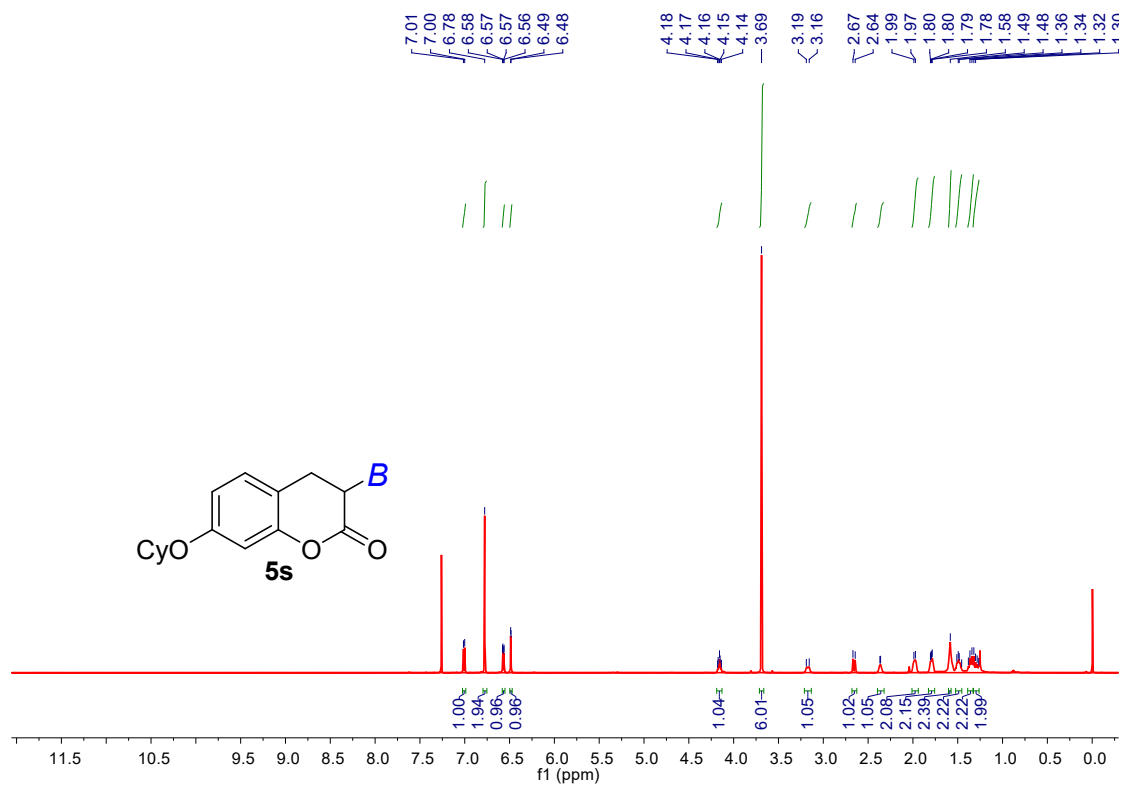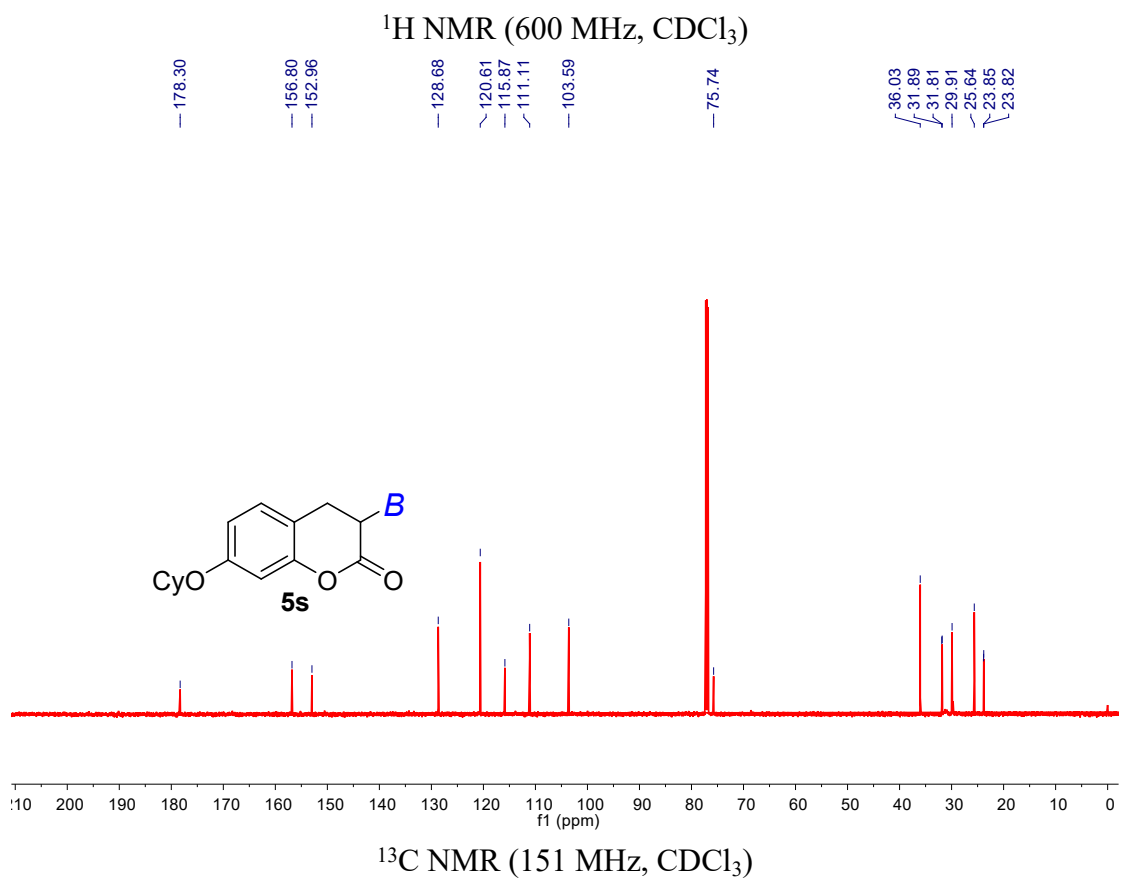



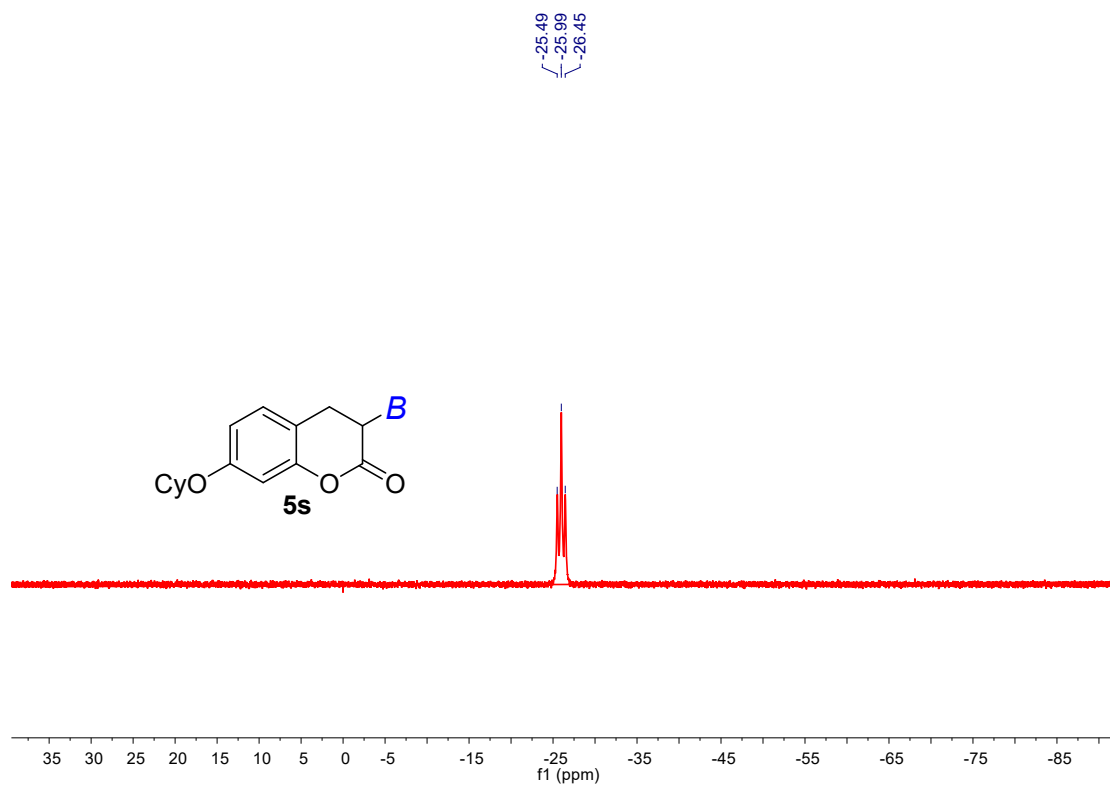

<sup>11</sup>B NMR (193 MHz, CDCl<sub>3</sub>)

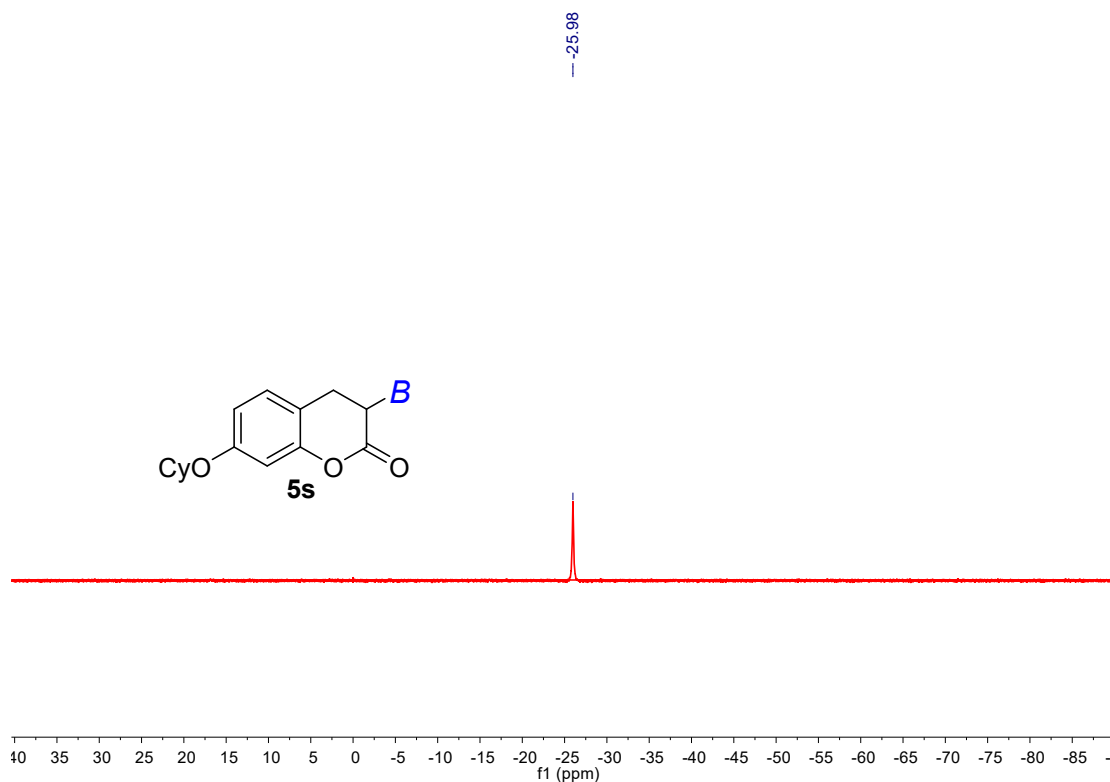

<sup>11</sup>B{<sup>1</sup>H} NMR (193 MHz, CDCl<sub>3</sub>)

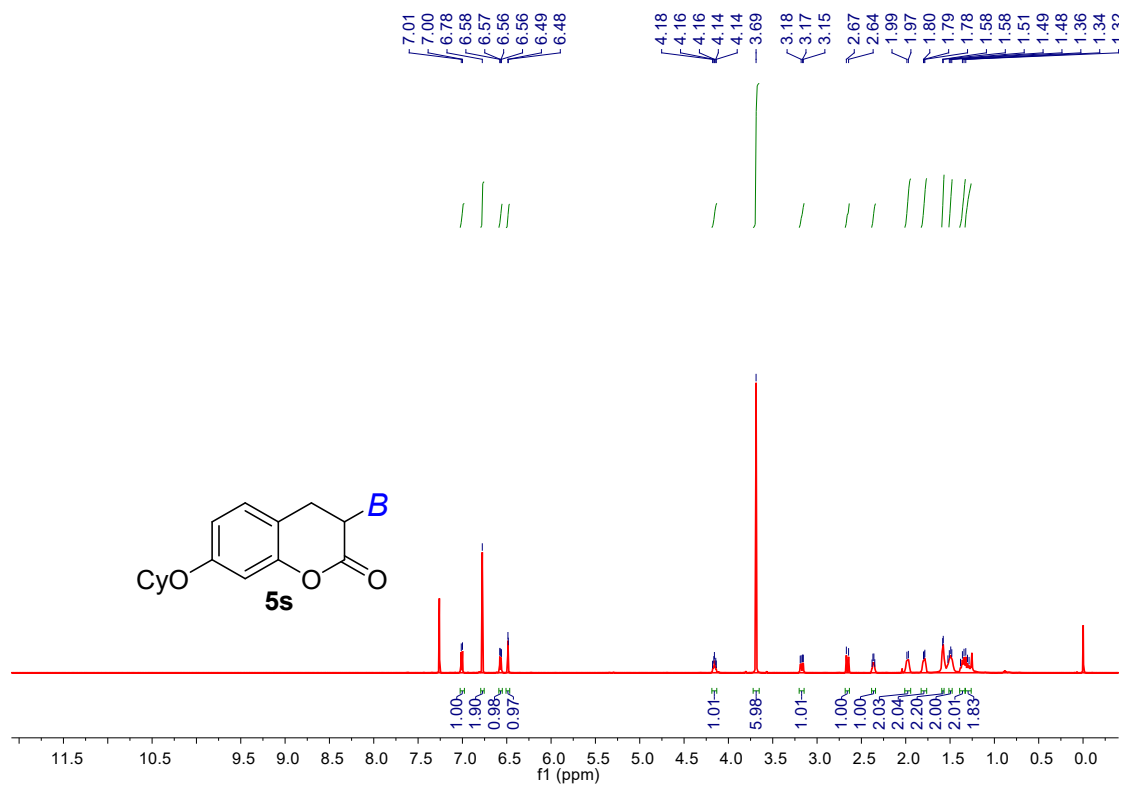

$^1\text{H}\{^{11}\text{B}\}$  NMR (600 MHz,  $\text{CDCl}_3$ )

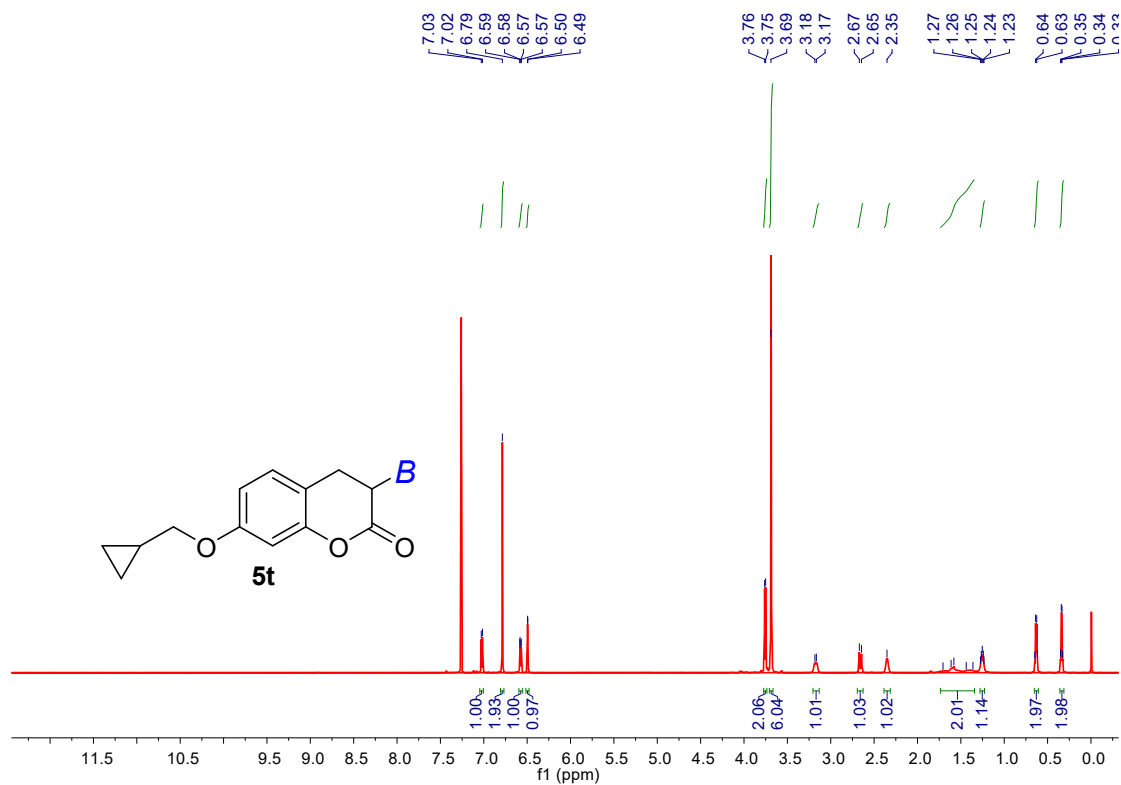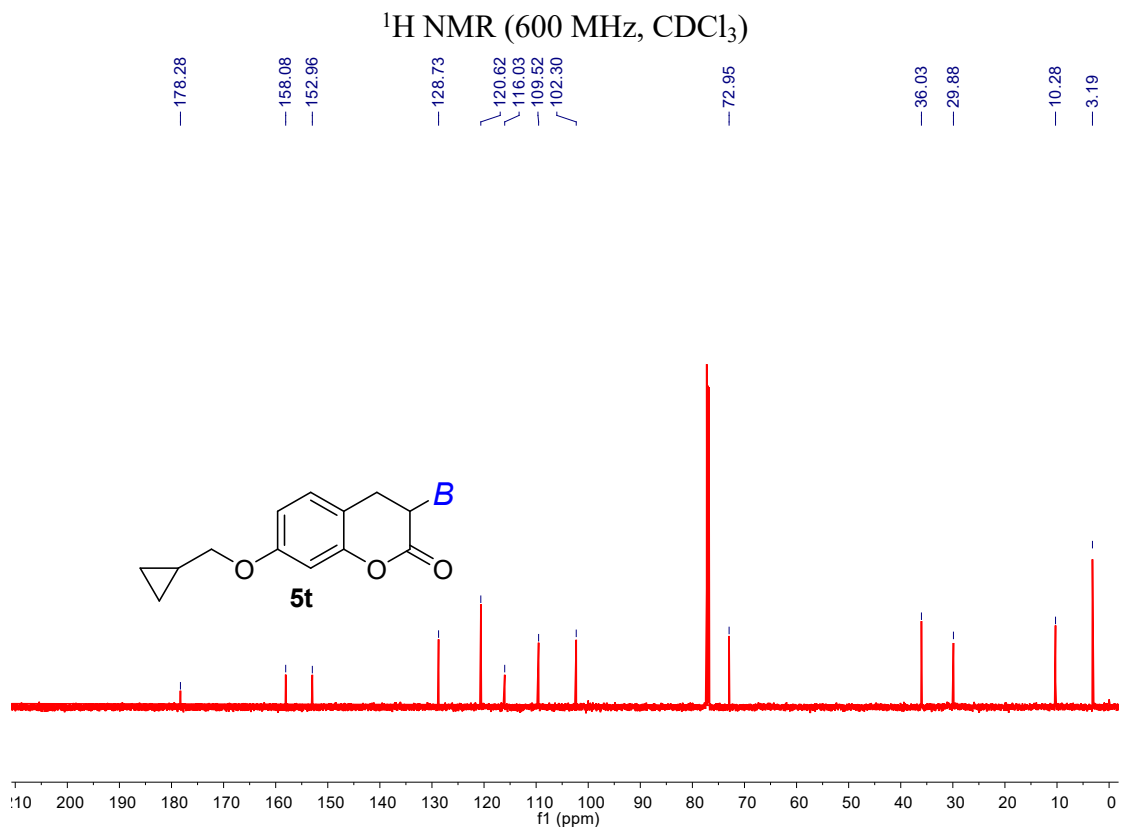

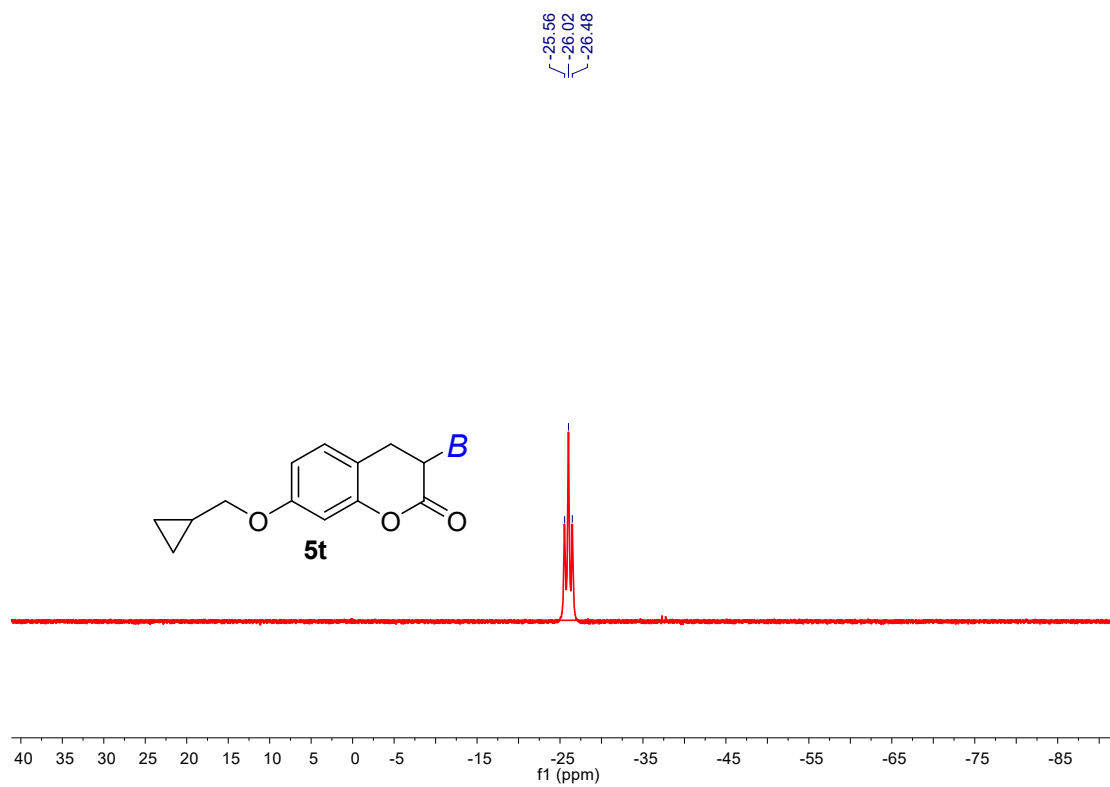

$^{11}\text{B}$  NMR (193 MHz,  $\text{CDCl}_3$ )

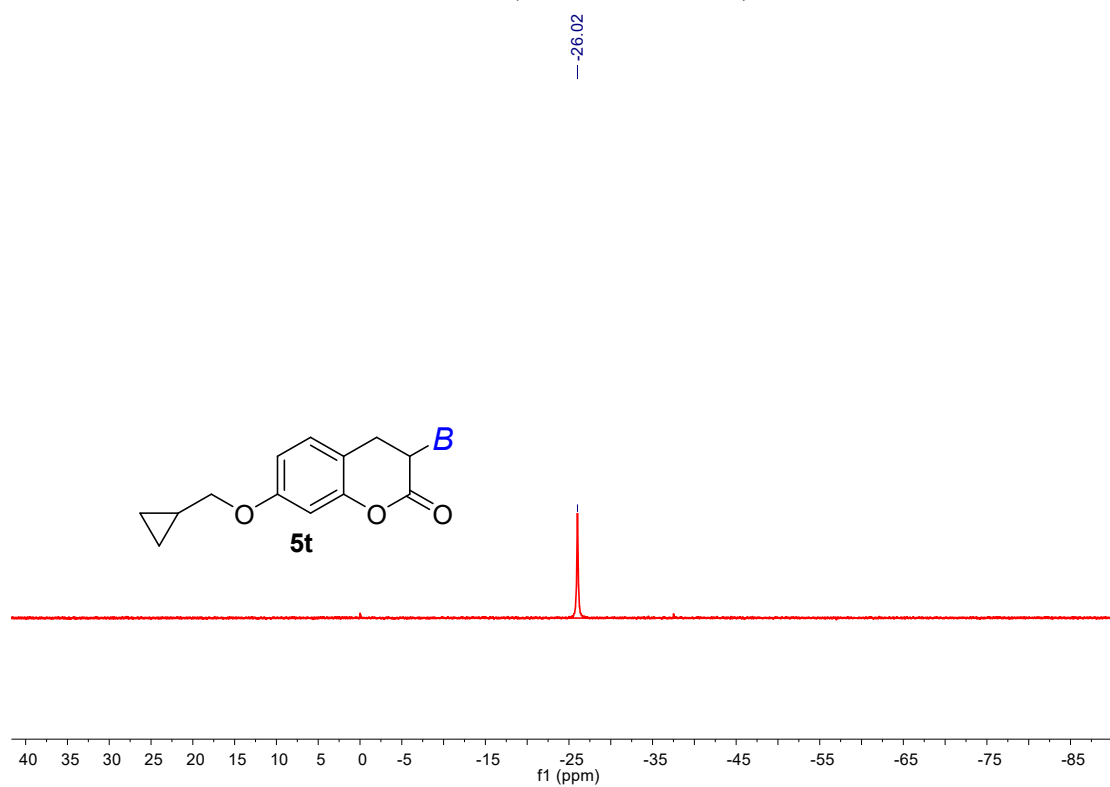

$^{11}\text{B}\{^1\text{H}\}$  NMR (193 MHz,  $\text{CDCl}_3$ )

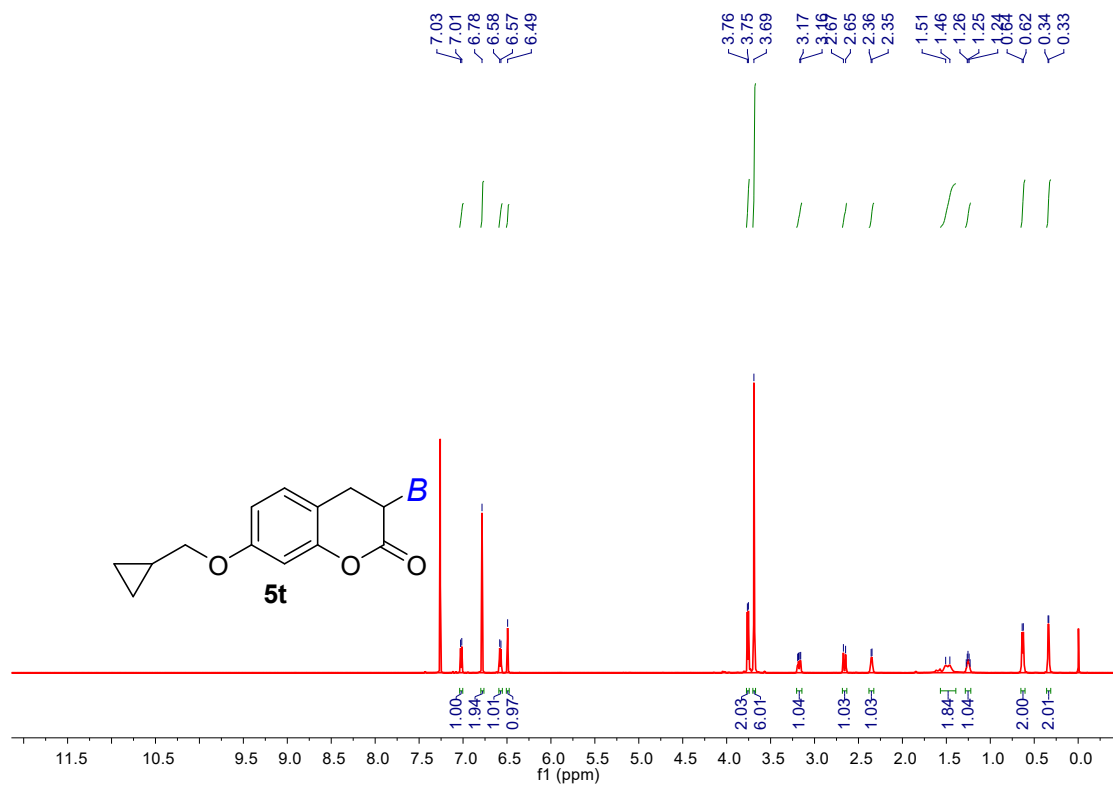

$^1\text{H}\{^{11}\text{B}\}$  NMR (600 MHz,  $\text{CDCl}_3$ )

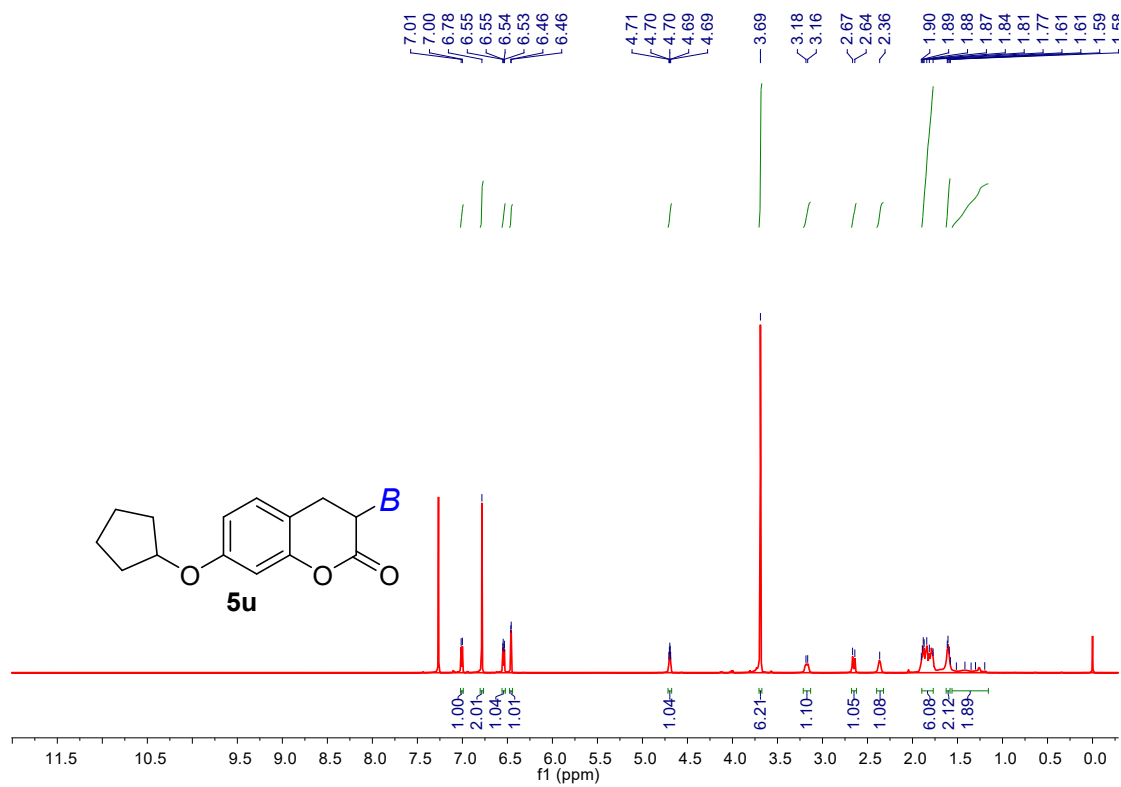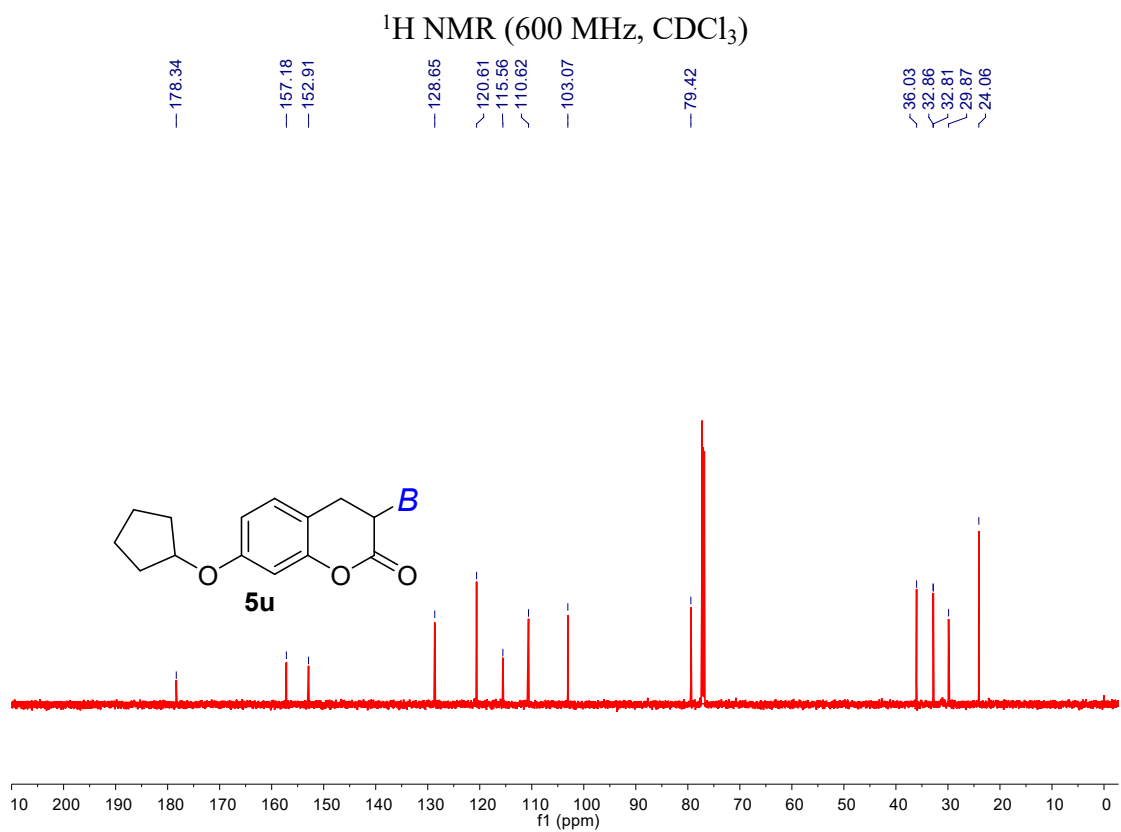

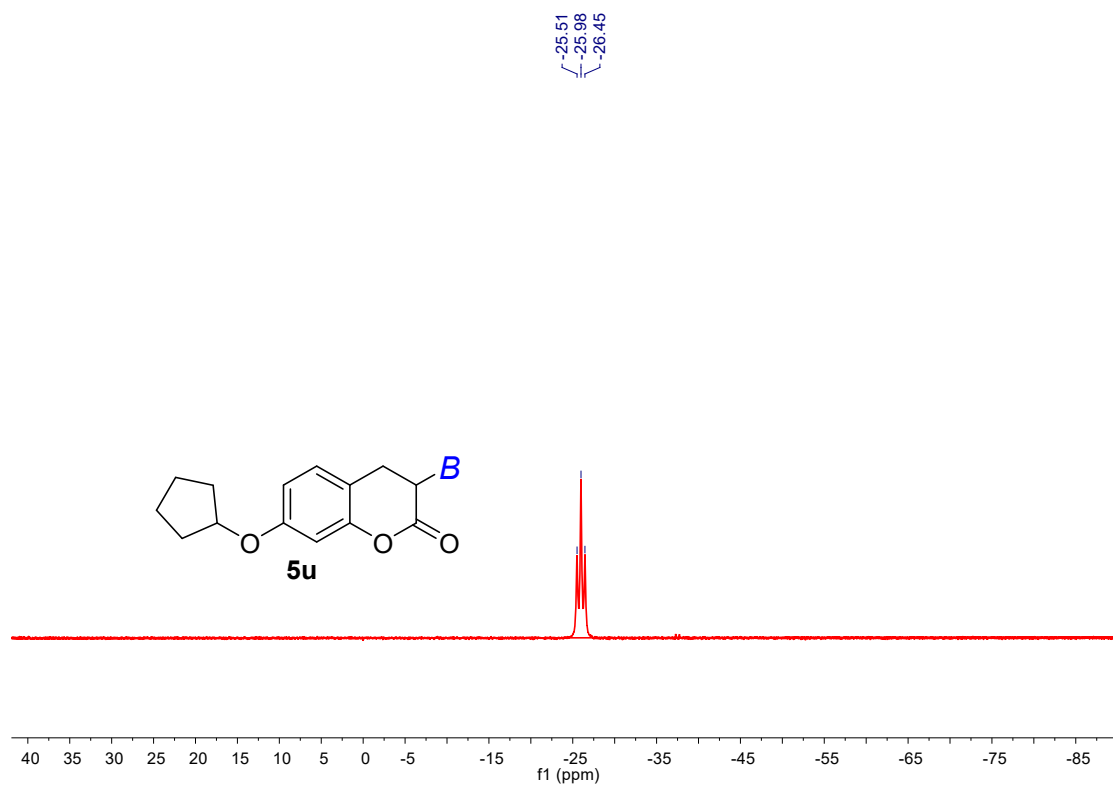

<sup>11</sup>B NMR (193 MHz, CDCl<sub>3</sub>)

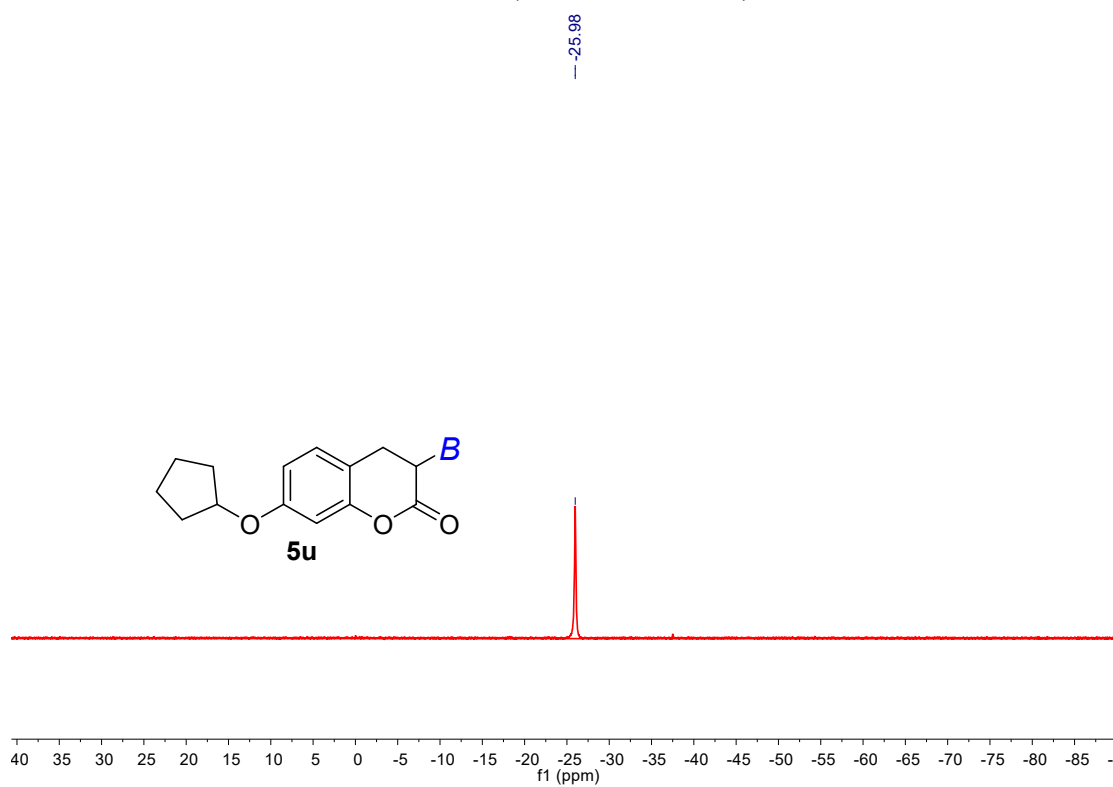

<sup>11</sup>B{<sup>1</sup>H} NMR (193 MHz, CDCl<sub>3</sub>)

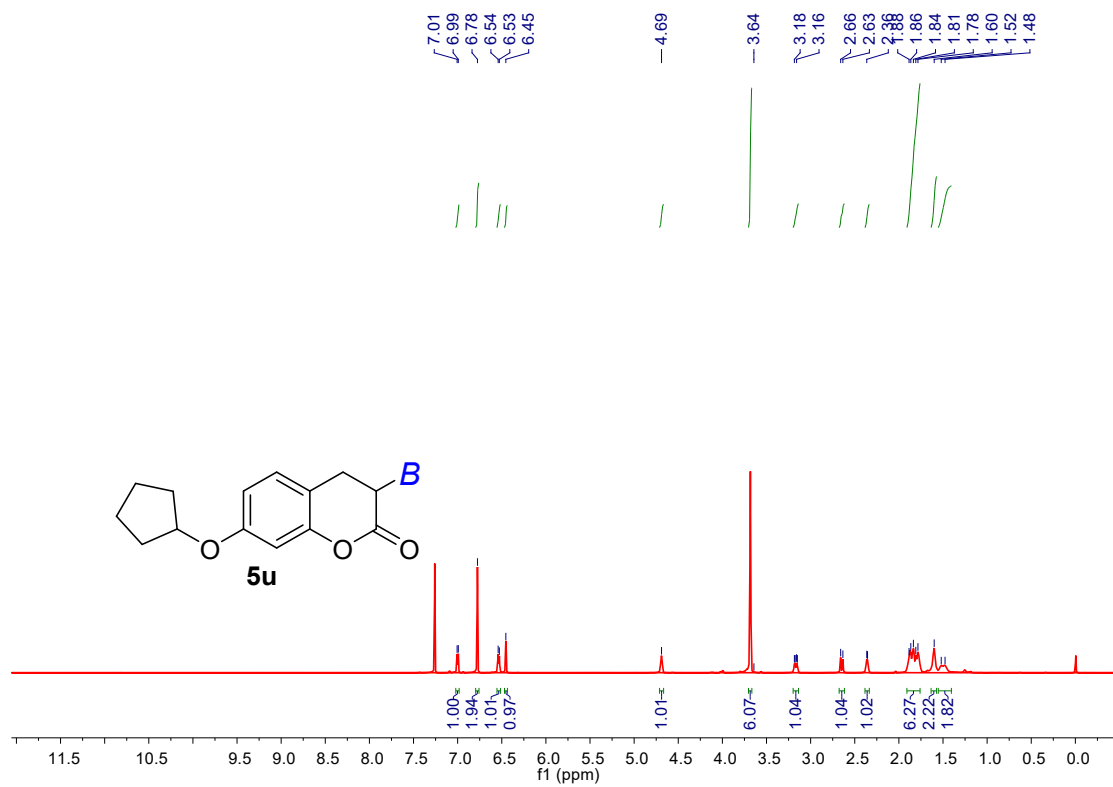

$^1\text{H}\{^{11}\text{B}\}$  NMR (600 MHz,  $\text{CDCl}_3$ )



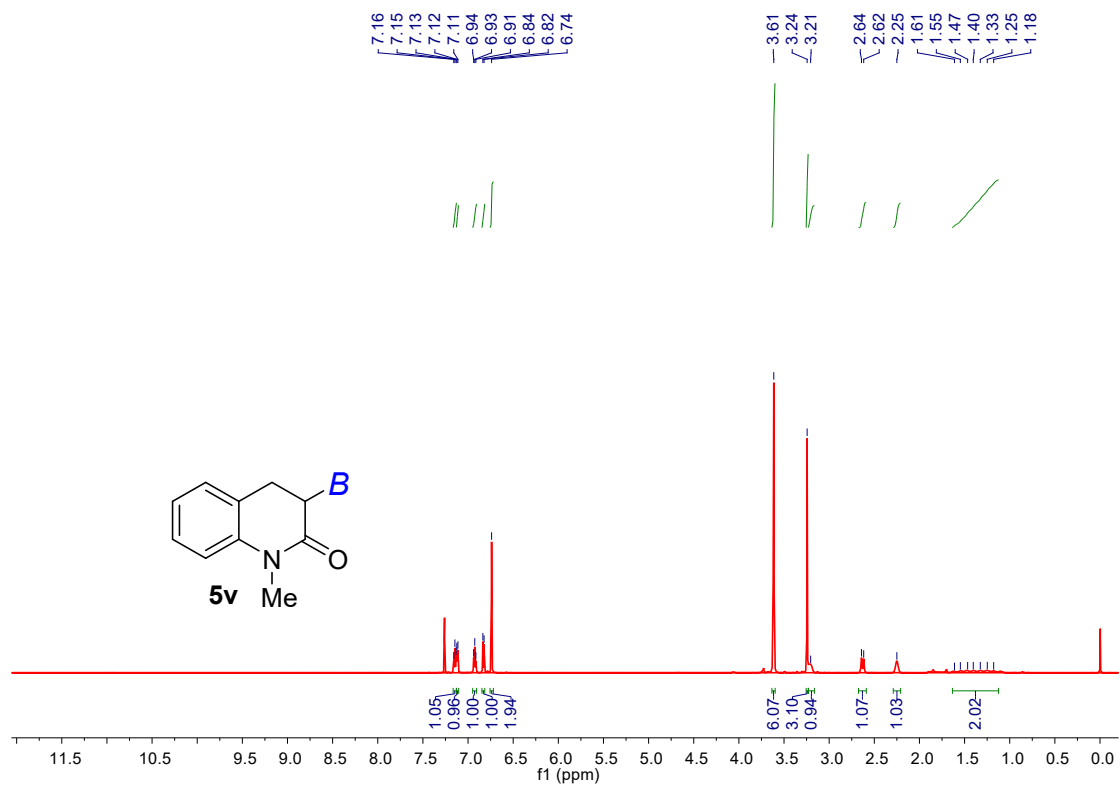

$^1\text{H NMR}$  (600 MHz,  $\text{CDCl}_3$ )

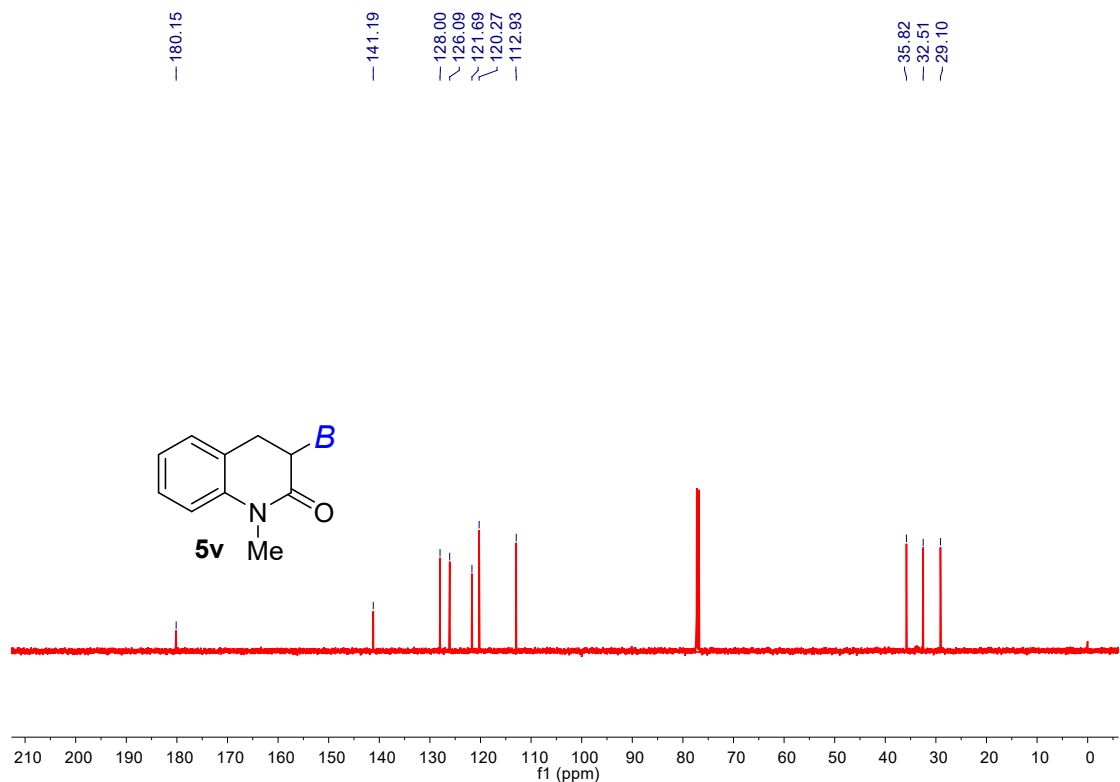

$^{13}\text{C NMR}$  (151 MHz,  $\text{CDCl}_3$ )

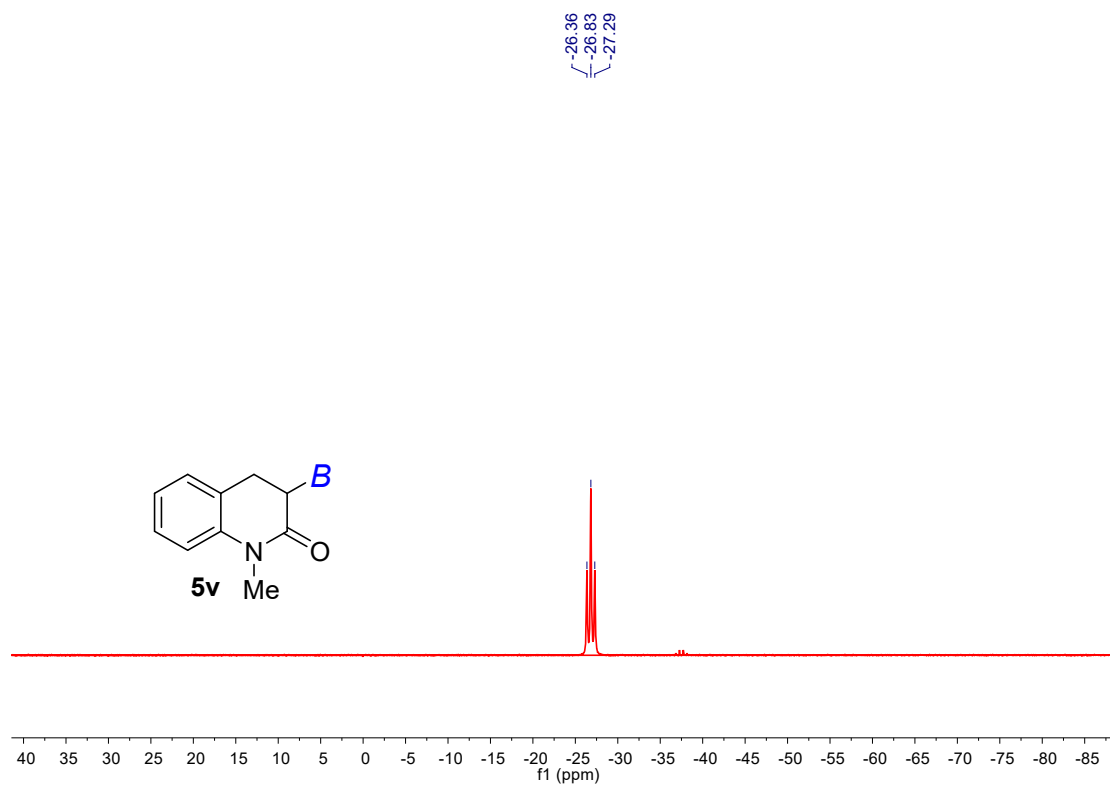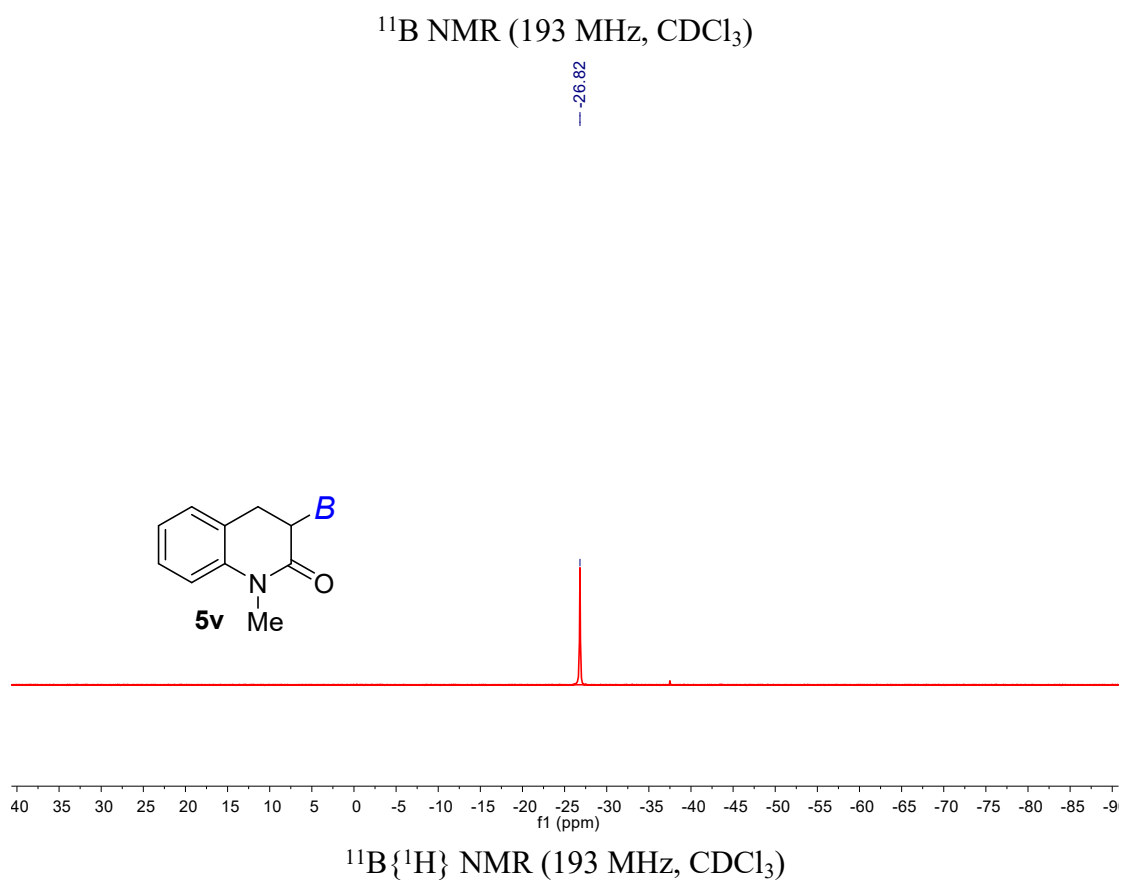

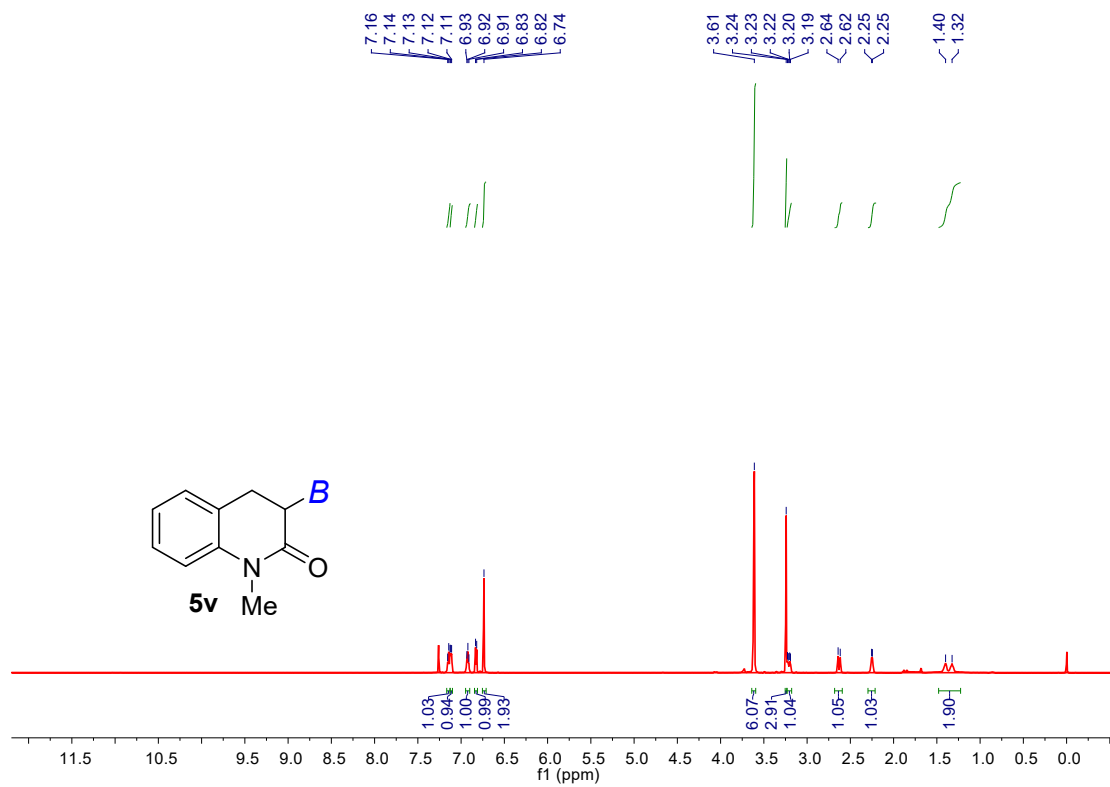

$^1\text{H}\{^{11}\text{B}\}$  NMR (600 MHz,  $\text{CDCl}_3$ )

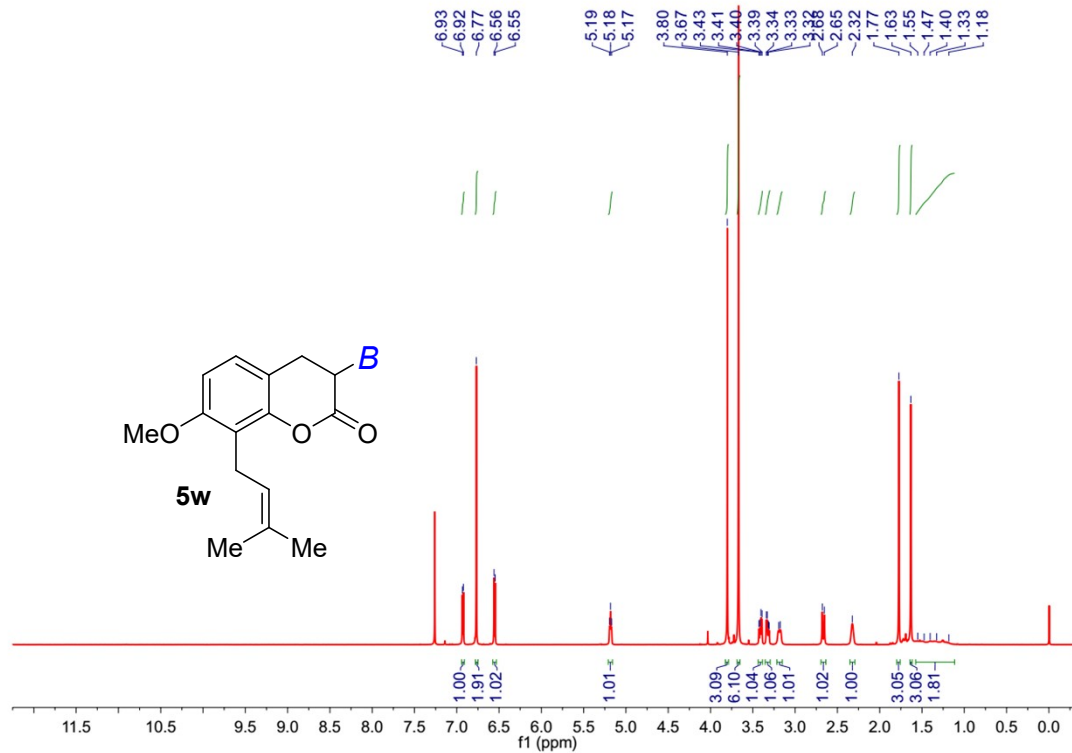

**<sup>1</sup>H NMR (600 MHz, CDCl<sub>3</sub>)**

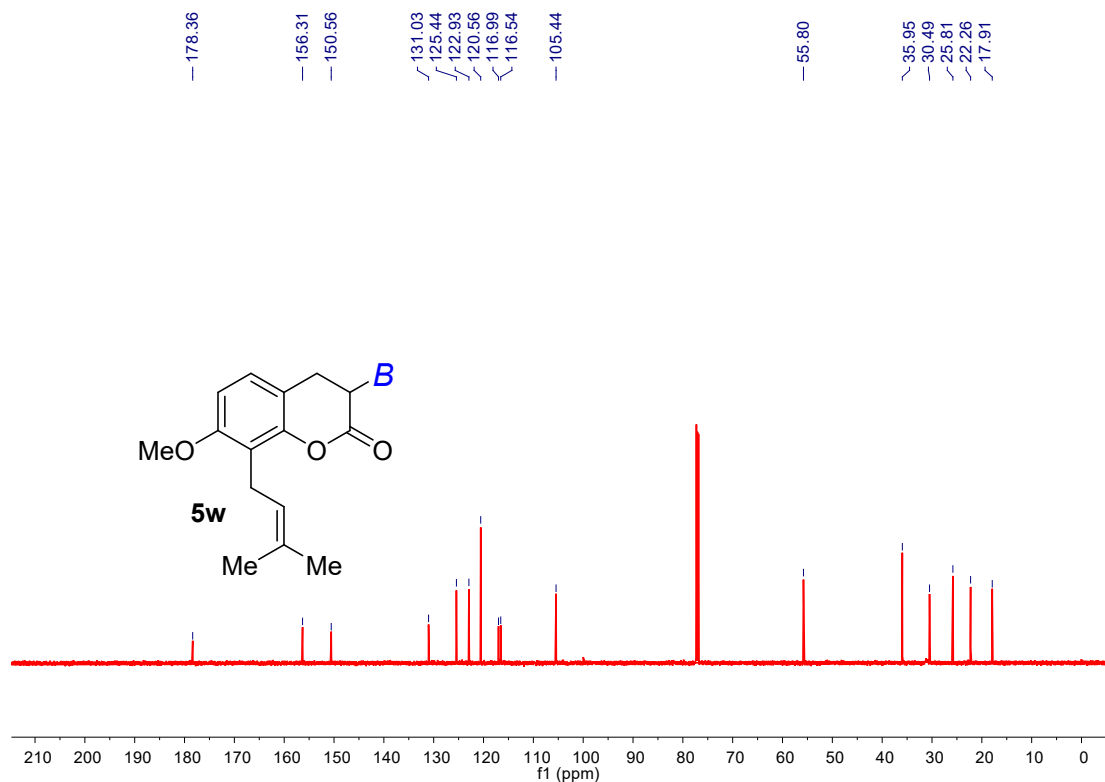

**<sup>13</sup>C NMR (151 MHz, CDCl<sub>3</sub>)**

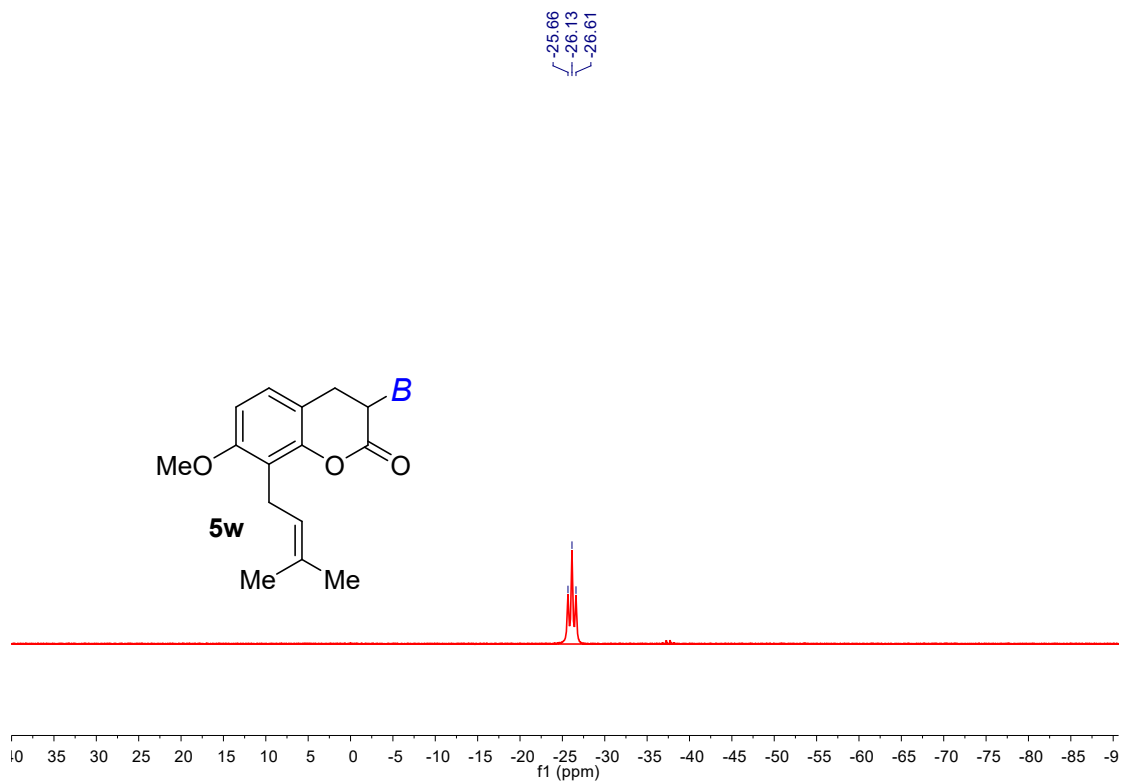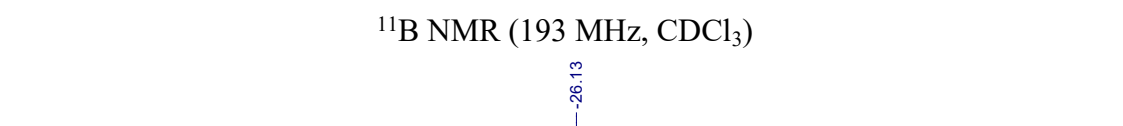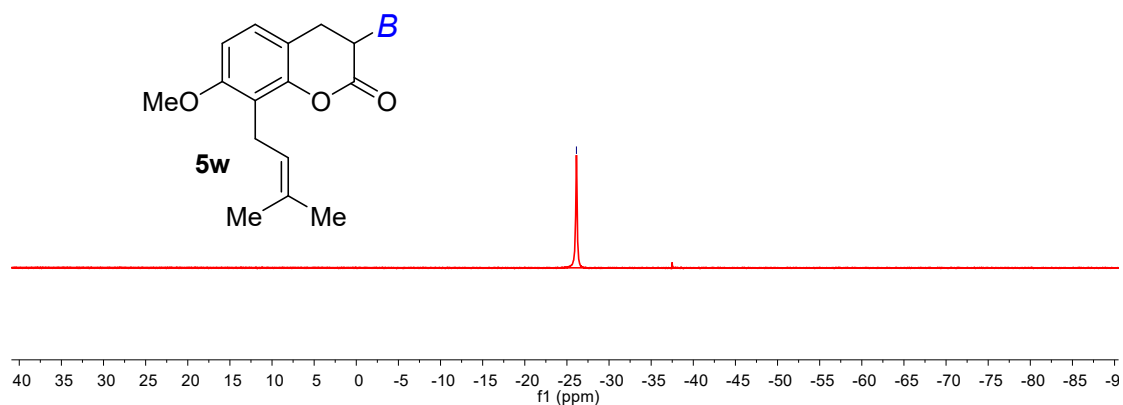

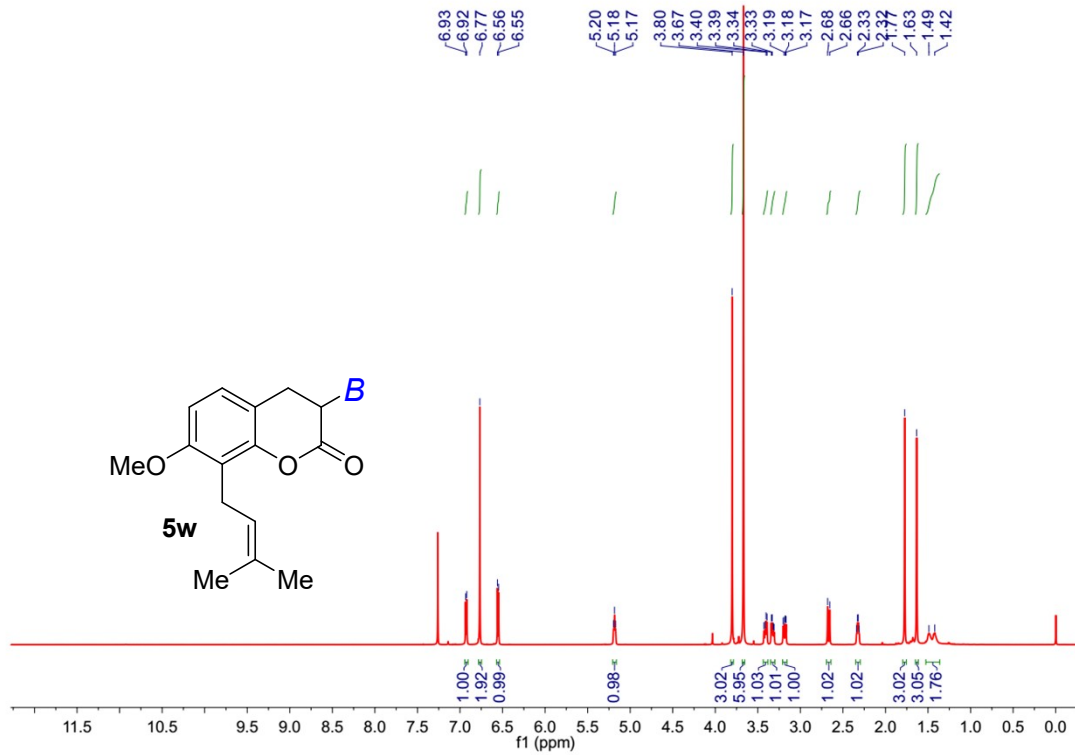

$^1\text{H}\{^{11}\text{B}\}$  NMR (600 MHz,  $\text{CDCl}_3$ )

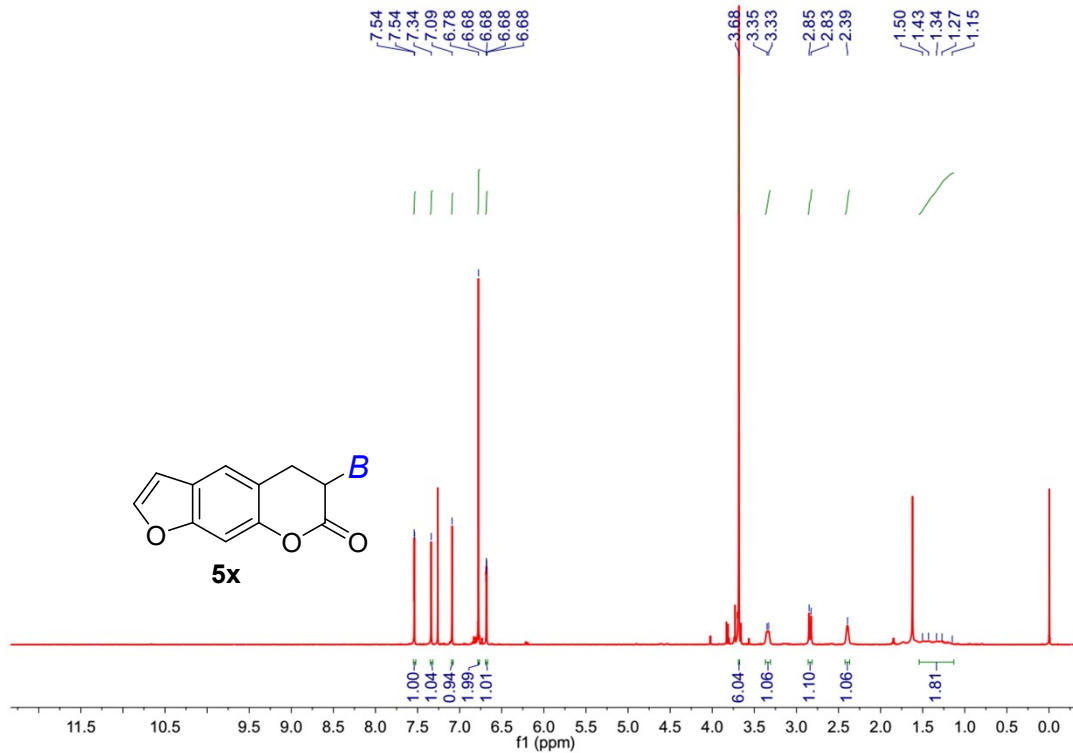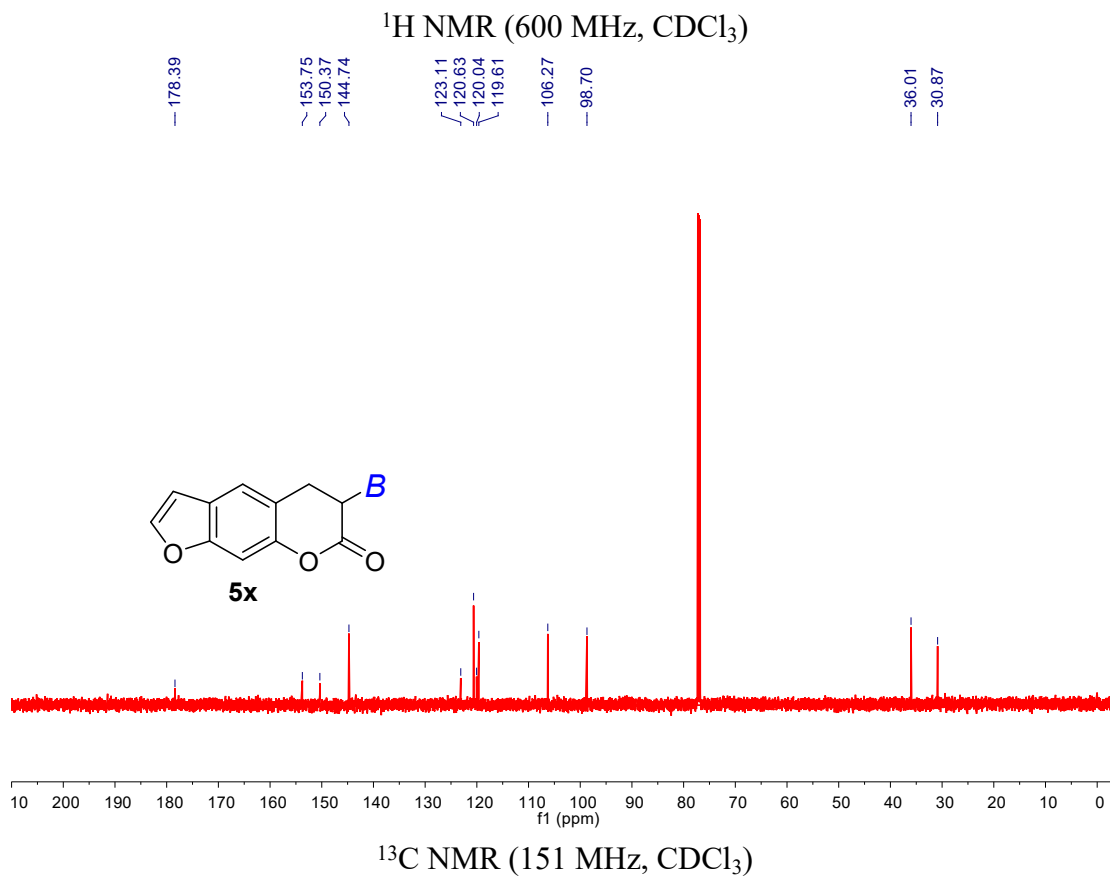

-25.78  
-26.25  
-26.73

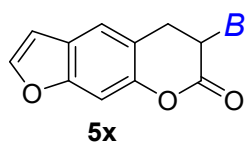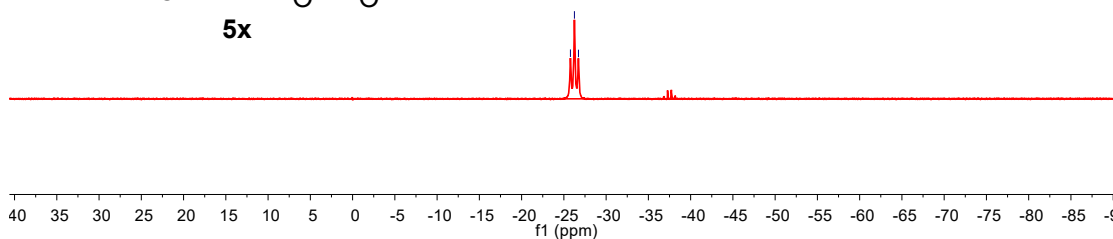

$^{11}\text{B}$  NMR (193 MHz,  $\text{CDCl}_3$ )

-26.25

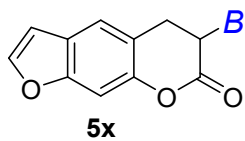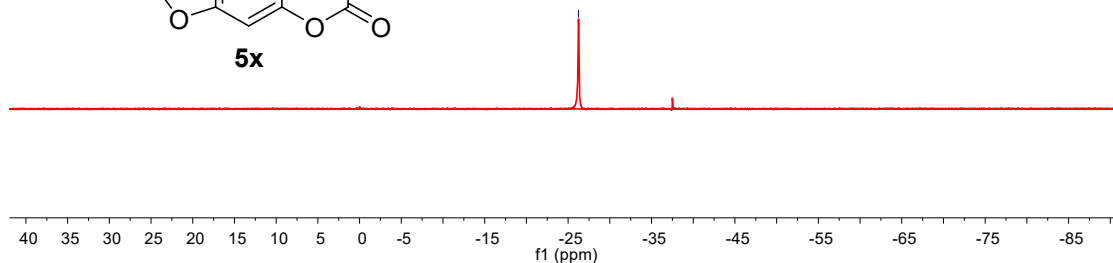

$^{11}\text{B}\{^1\text{H}\}$  NMR (193 MHz,  $\text{CDCl}_3$ )



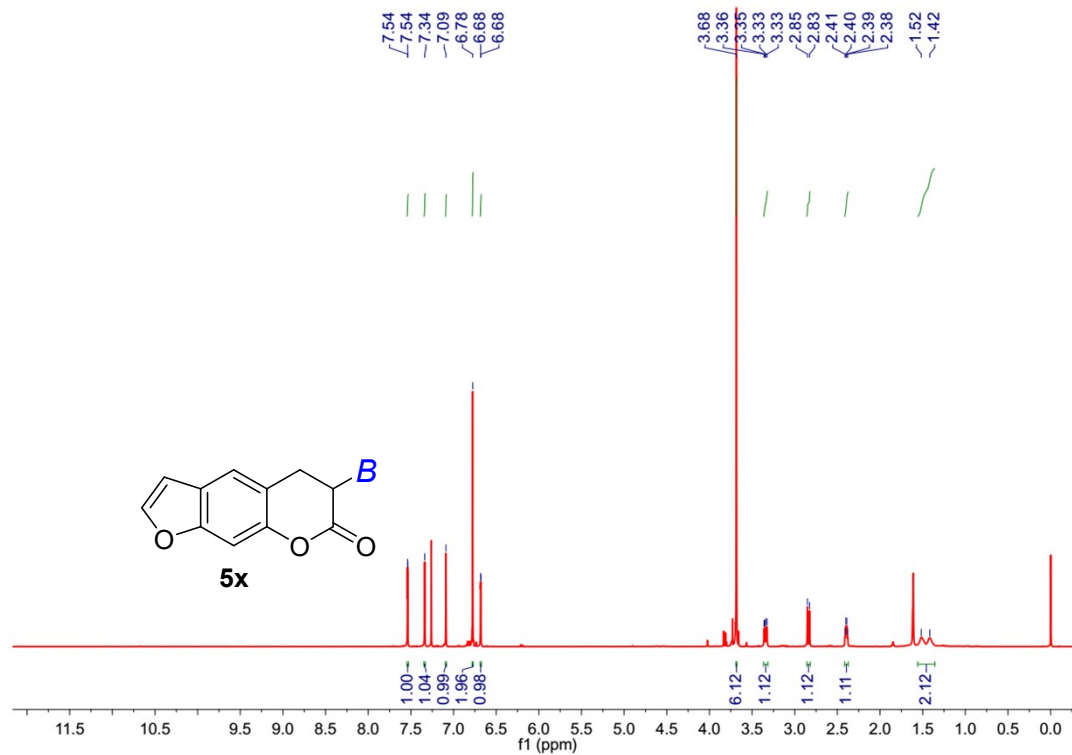

$^1\text{H}\{^{11}\text{B}\}$  NMR (600 MHz,  $\text{CDCl}_3$ )

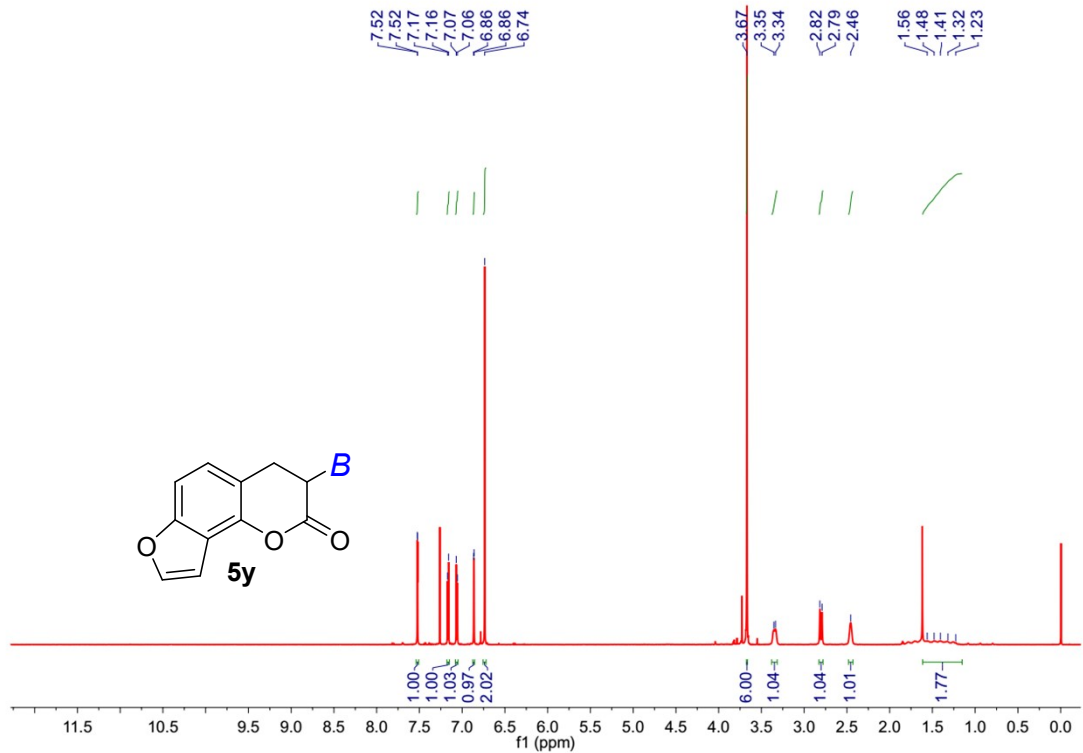

**<sup>1</sup>H NMR (600 MHz, CDCl<sub>3</sub>)**

— 178.12      — 154.97      — 144.98      — 144.40      — 124.45      — 120.62      — 116.55      — 116.46      — 106.20      — 103.34      — 36.01      — 30.35

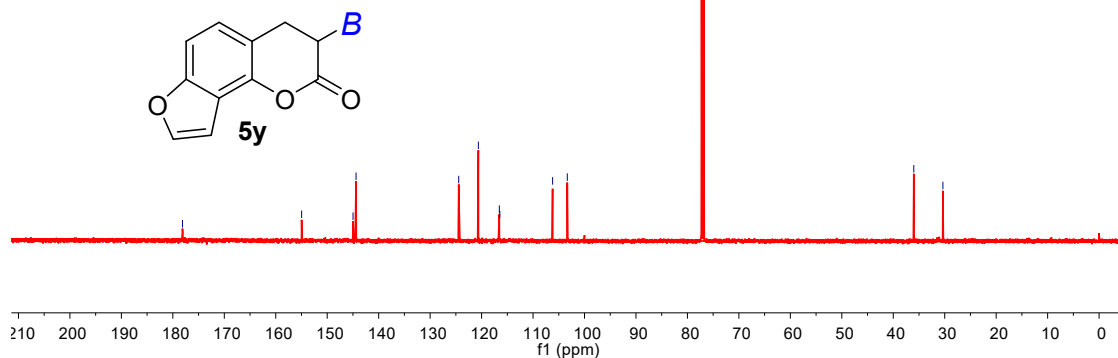

**<sup>13</sup>C NMR (151 MHz, CDCl<sub>3</sub>)**

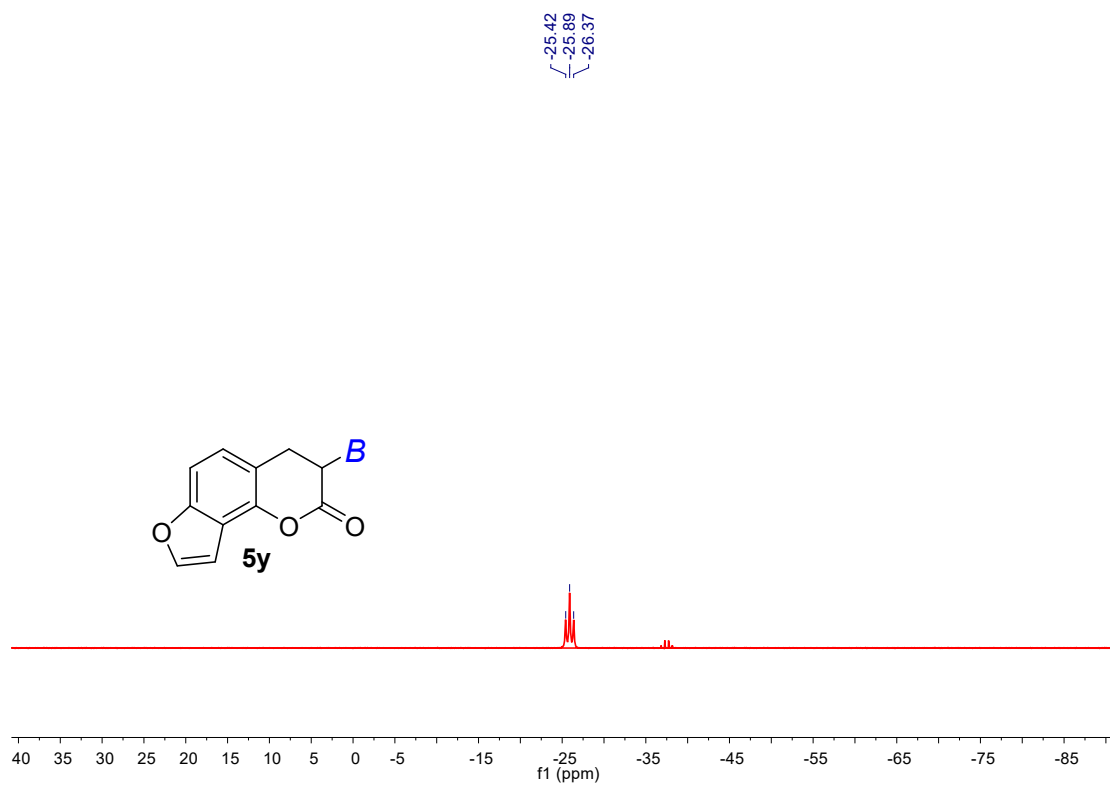

$^{11}\text{B}$  NMR (193 MHz,  $\text{CDCl}_3$ )

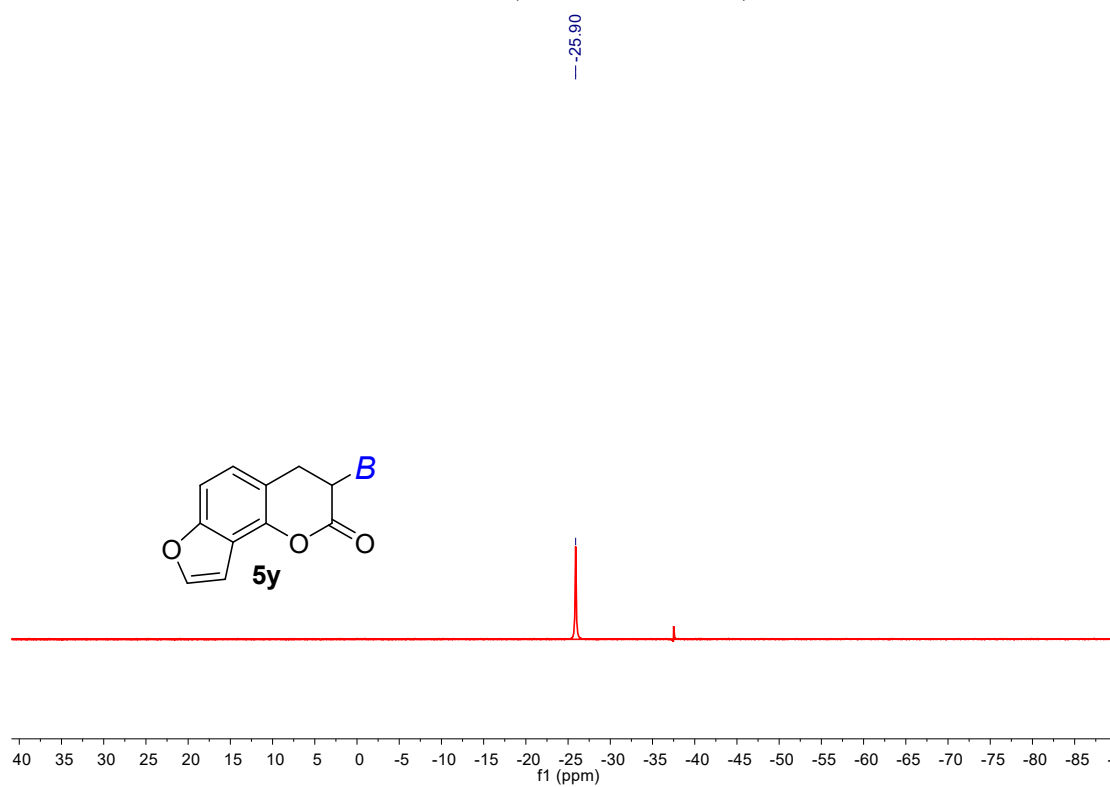

$^{11}\text{B}\{^1\text{H}\}$  NMR (193 MHz,  $\text{CDCl}_3$ )

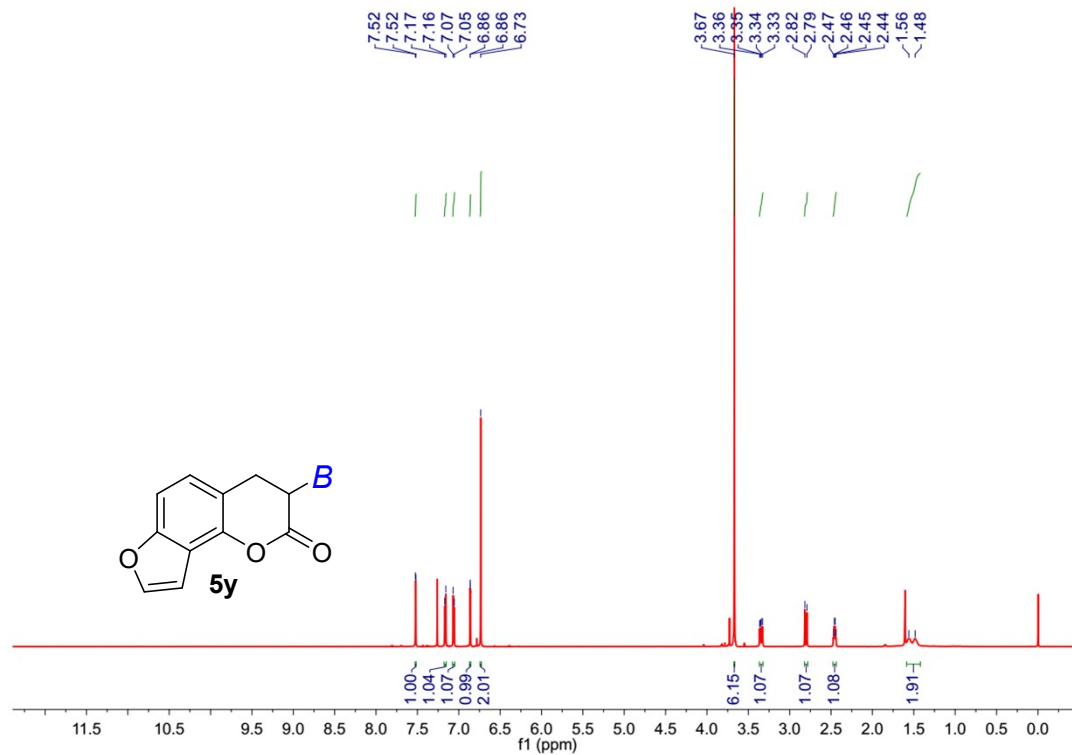

$^1\text{H}\{^{11}\text{B}\}$  NMR (600 MHz,  $\text{CDCl}_3$ )

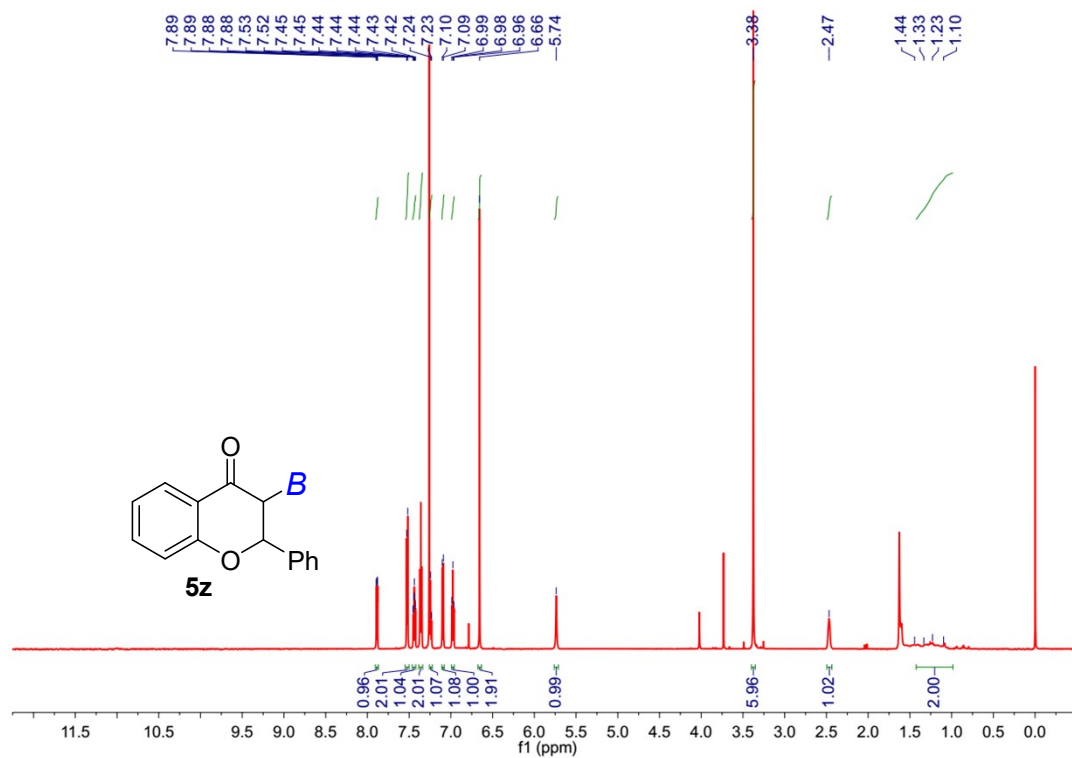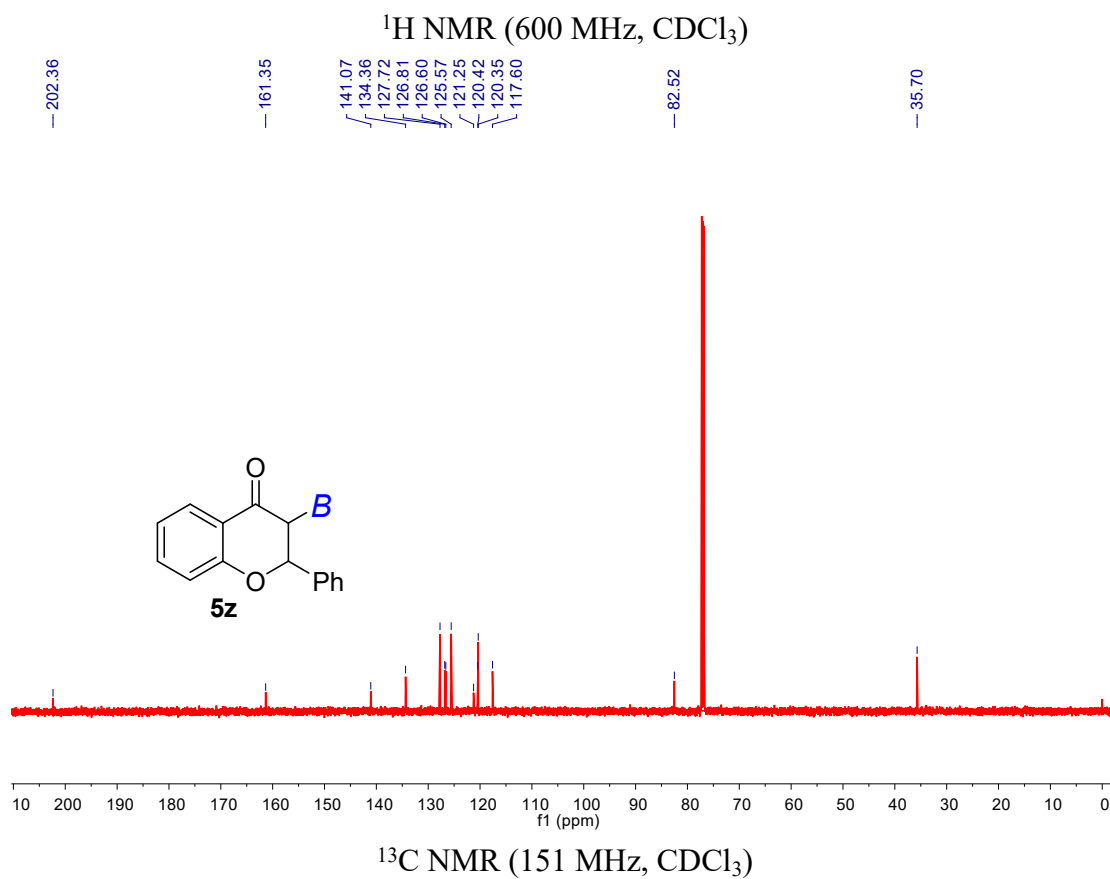

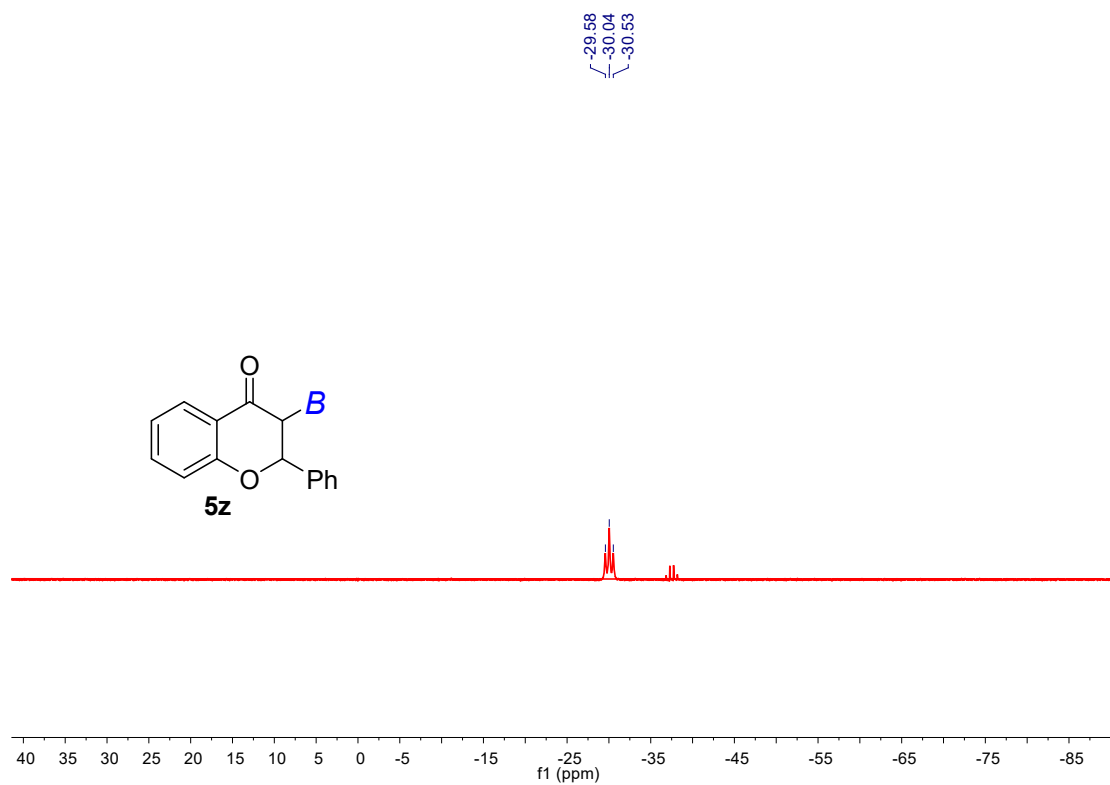

$^{11}\text{B}$  NMR (193 MHz,  $\text{CDCl}_3$ )

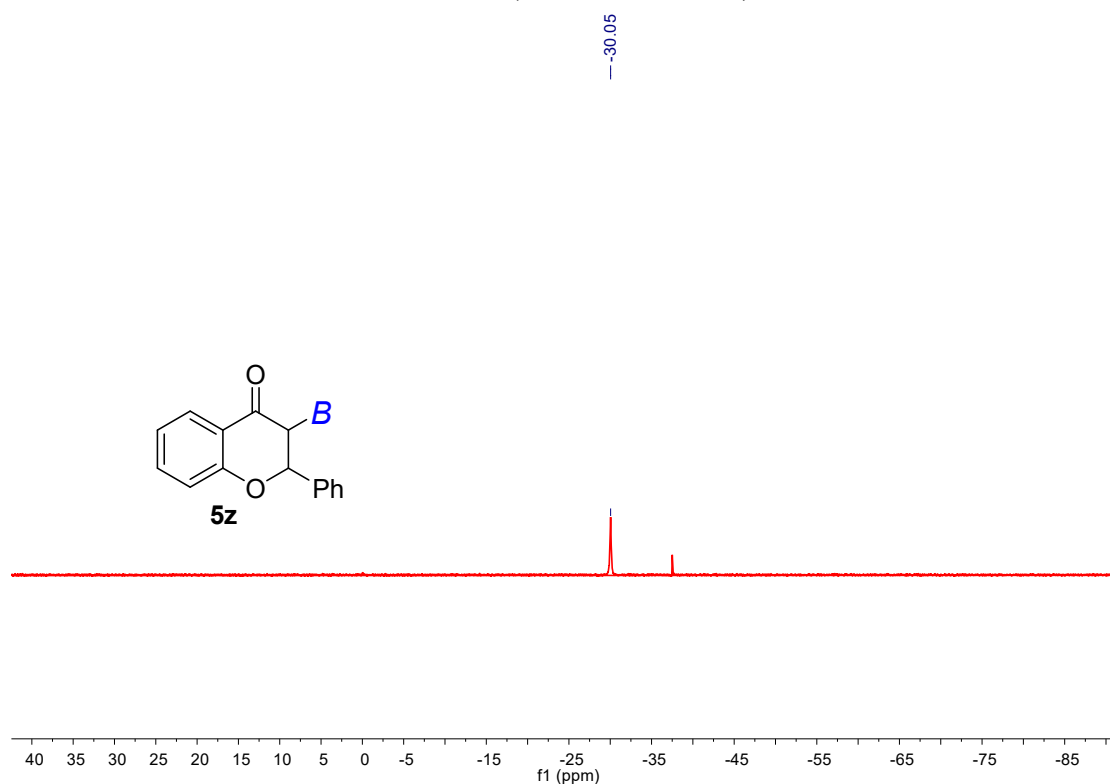

$^{11}\text{B}\{^1\text{H}\}$  NMR (193 MHz,  $\text{CDCl}_3$ )

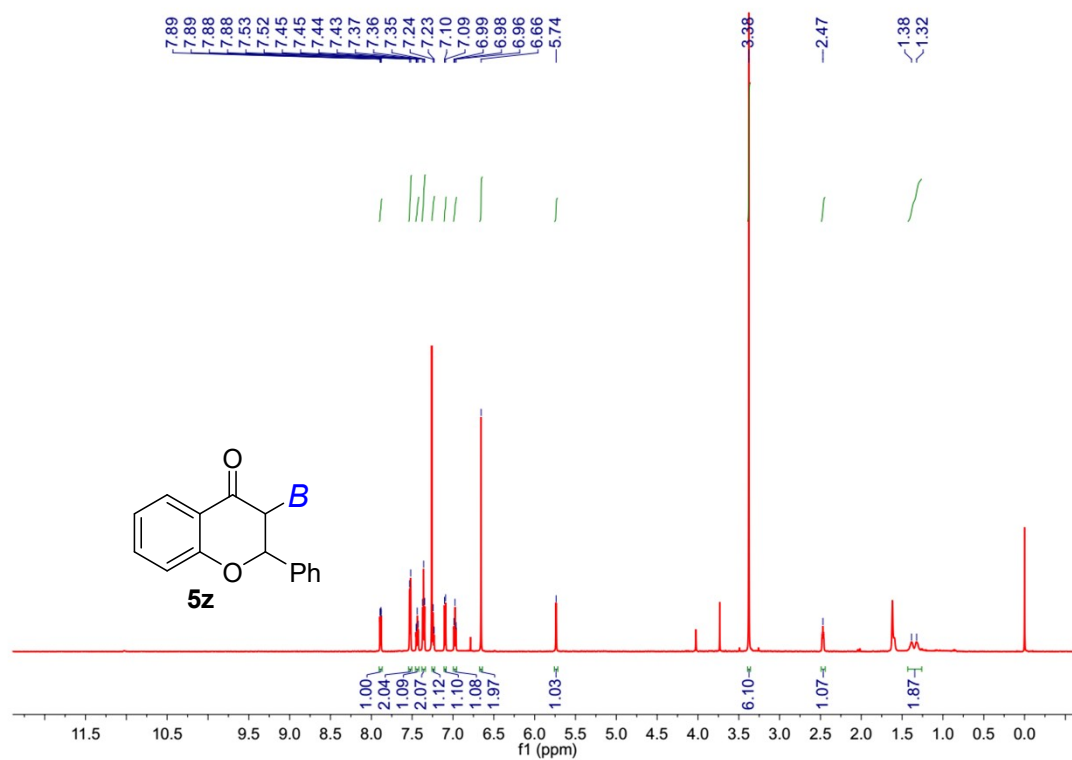

$^1\text{H}\{^{11}\text{B}\}$  NMR (600 MHz,  $\text{CDCl}_3$ )

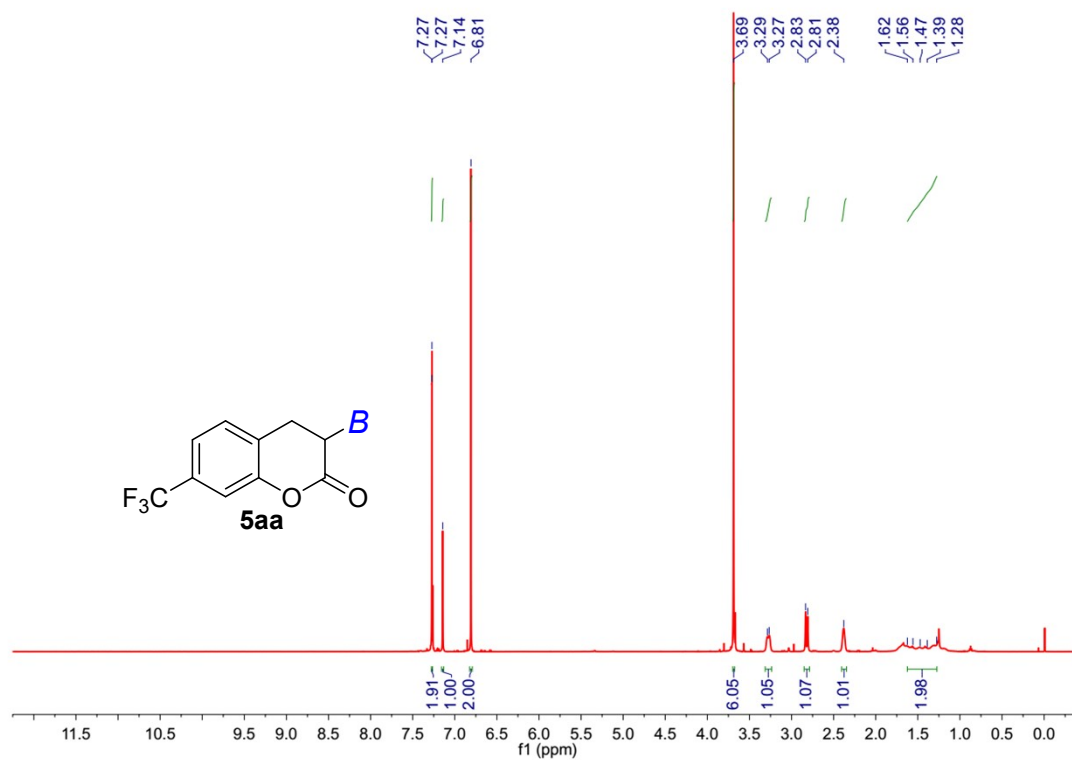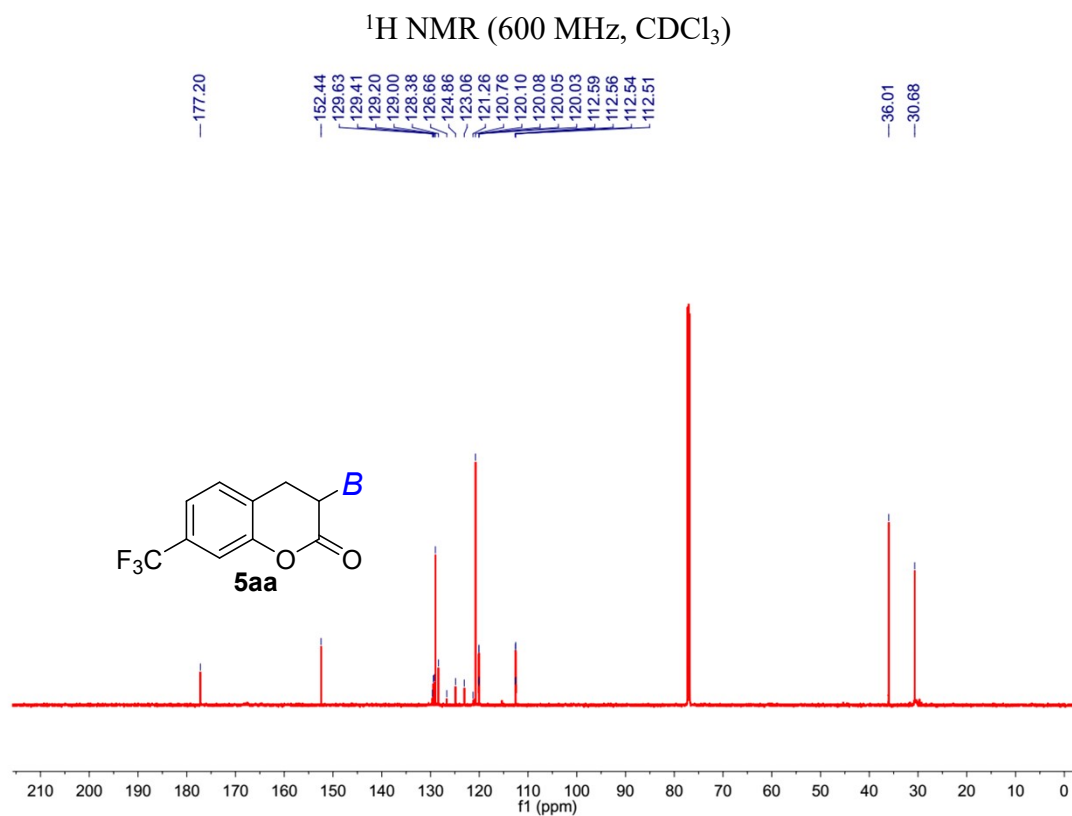



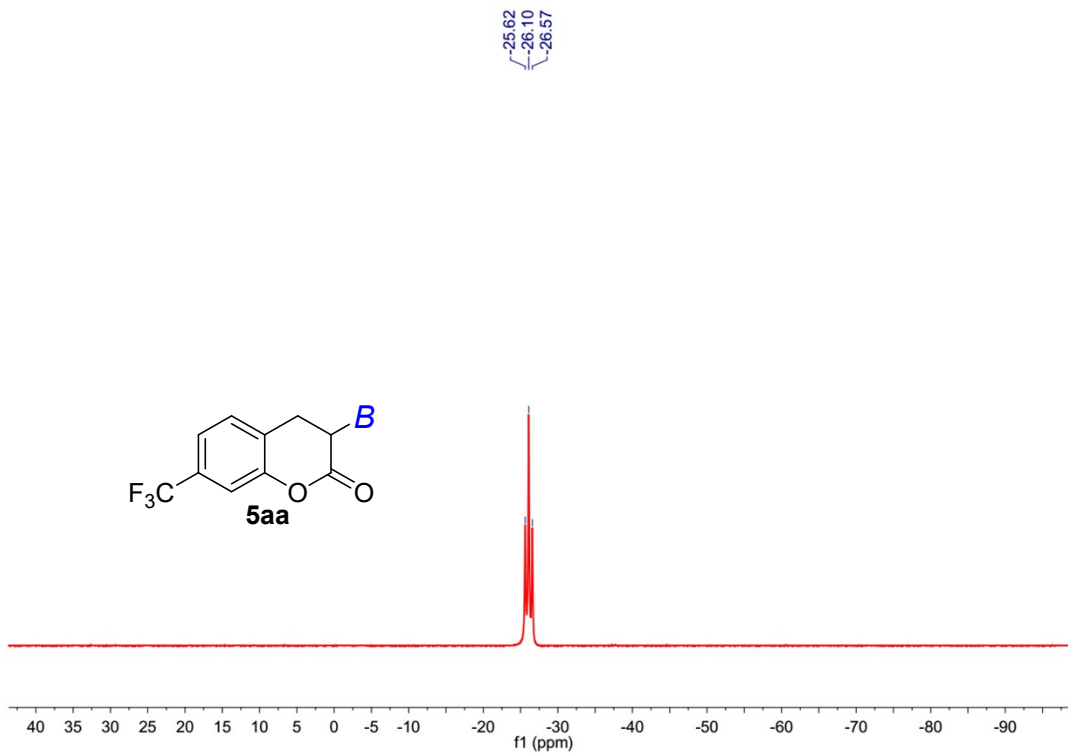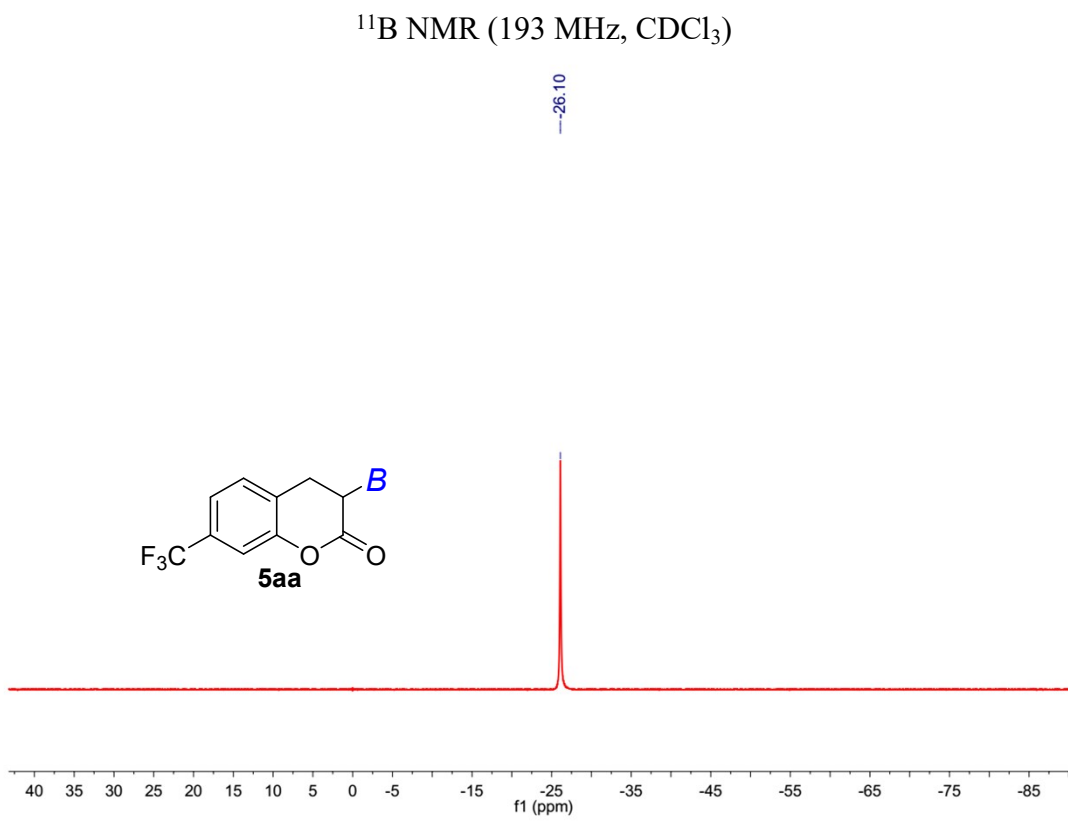

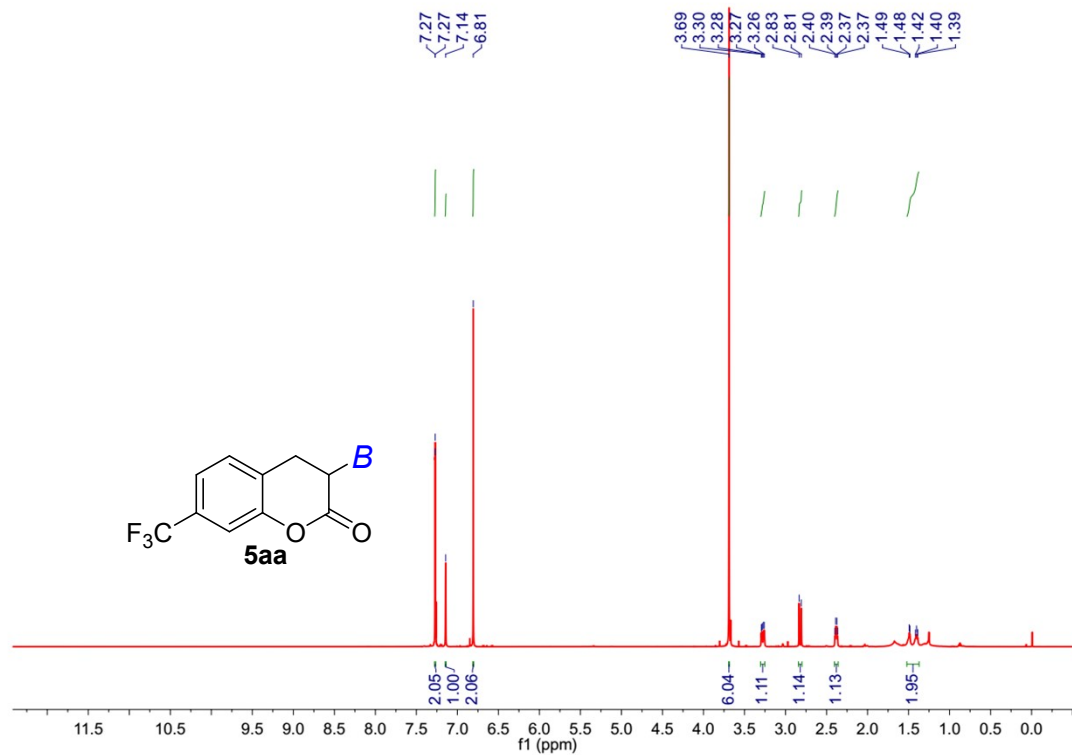

$^1H\{^{11}B\}$  NMR (600 MHz,  $CDCl_3$ )

---62.30

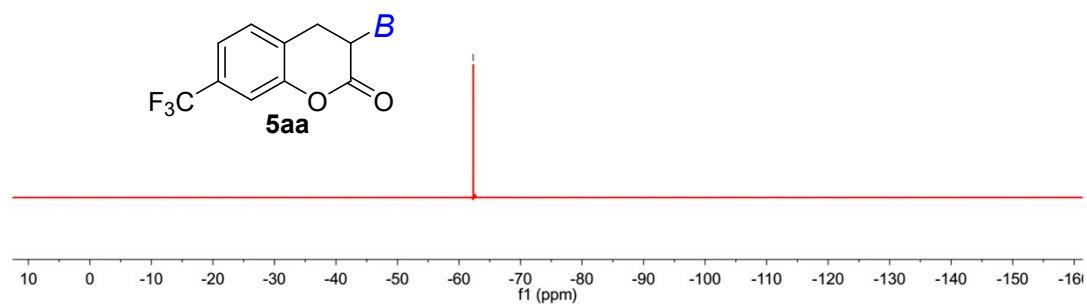

$^{19}F$  NMR (565 MHz,  $CDCl_3$ )

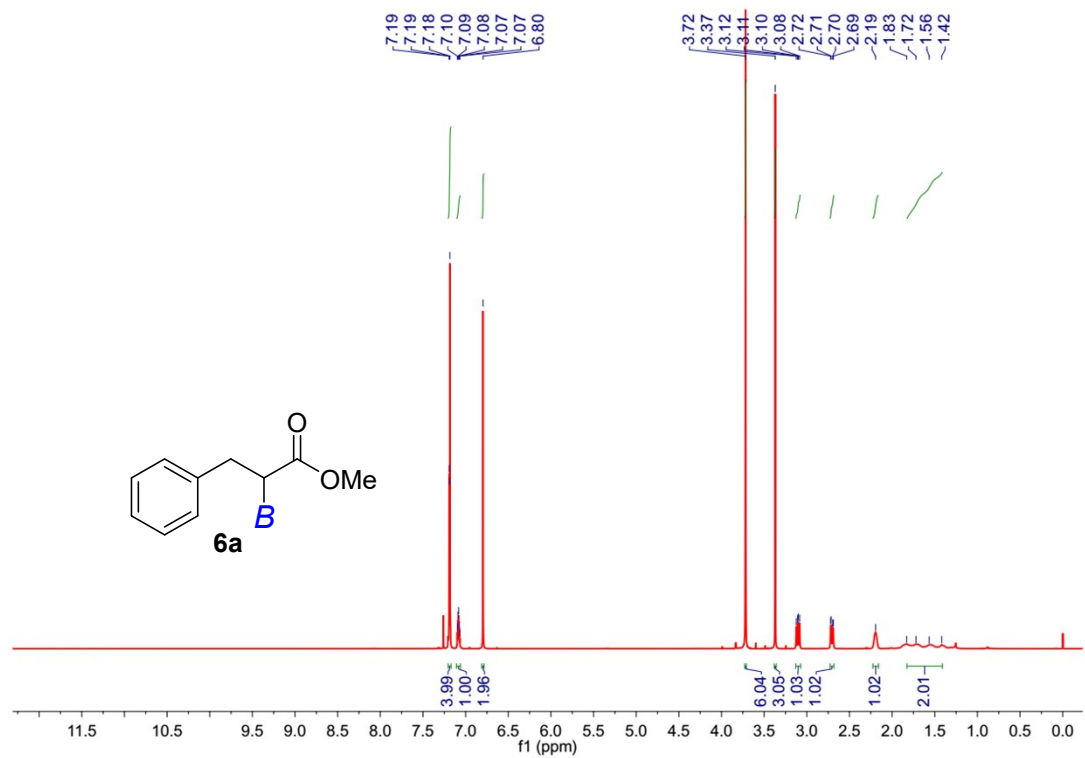

<sup>1</sup>H NMR (600 MHz, CDCl<sub>3</sub>)

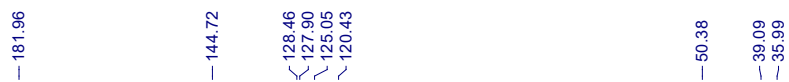

<sup>13</sup>C NMR (151 MHz, CDCl<sub>3</sub>)

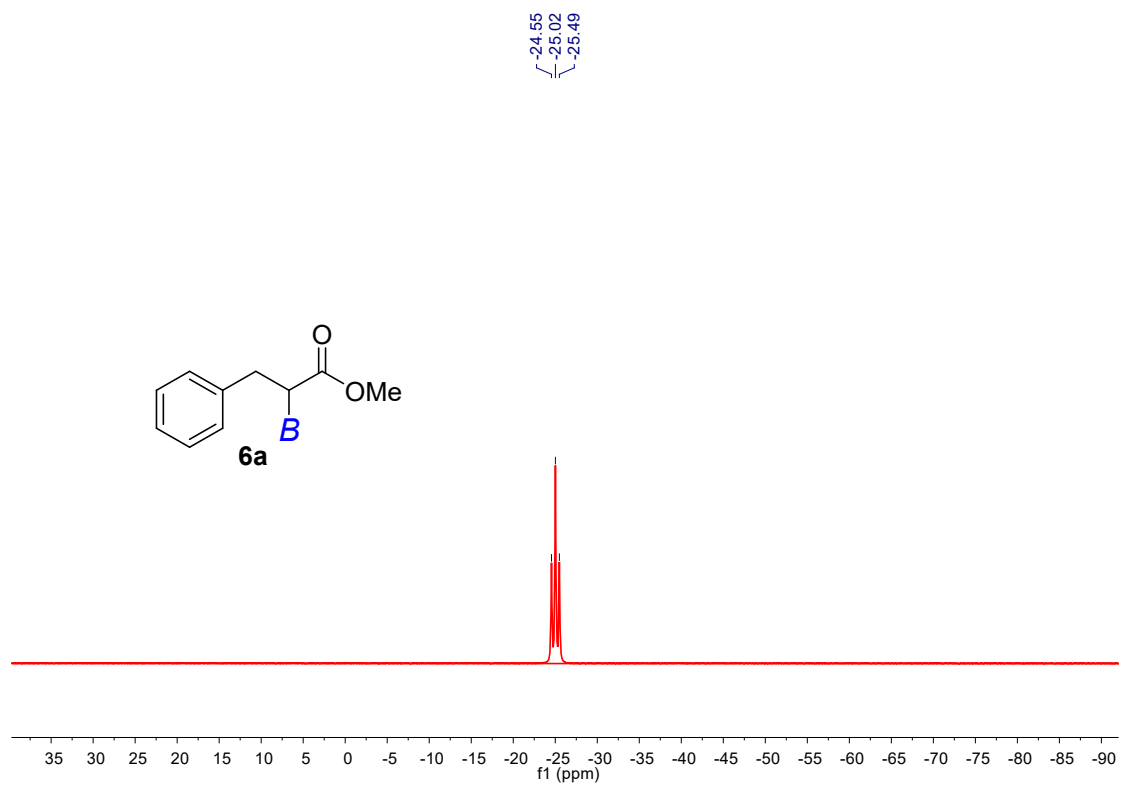

$^{11}\text{B}$  NMR (193 MHz,  $\text{CDCl}_3$ )

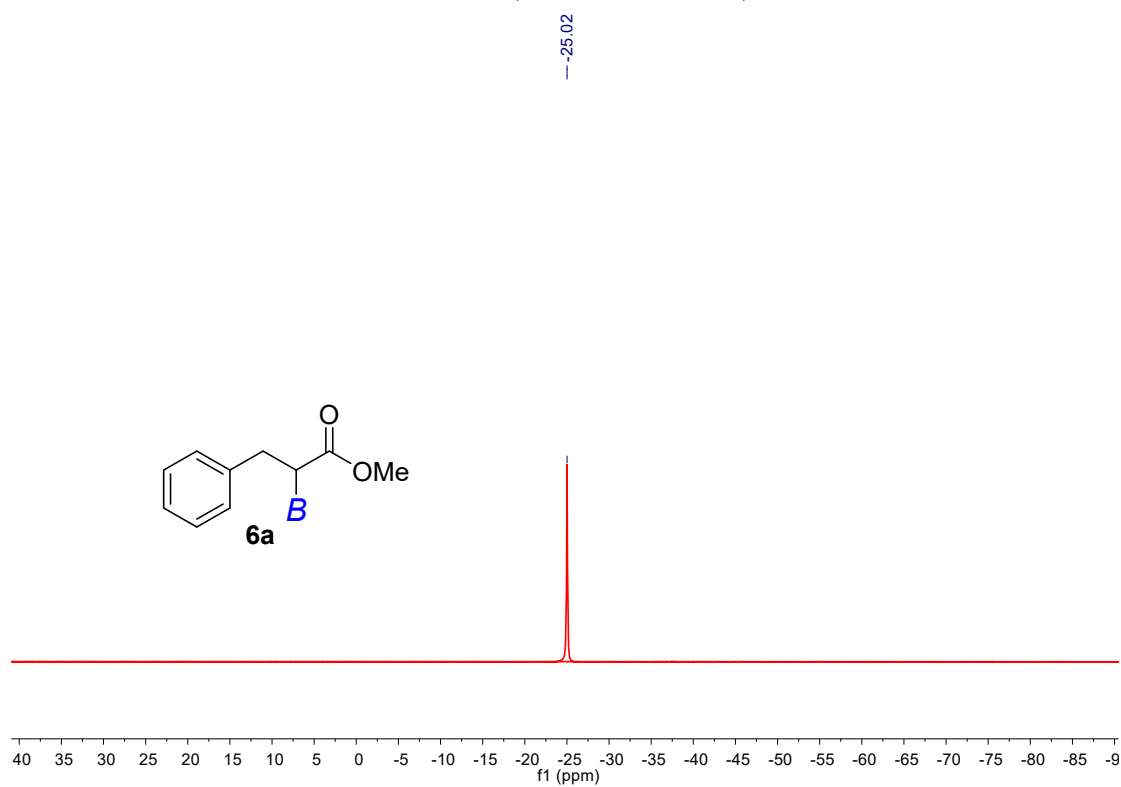

$^{11}\text{B}\{^1\text{H}\}$  NMR (193 MHz,  $\text{CDCl}_3$ )

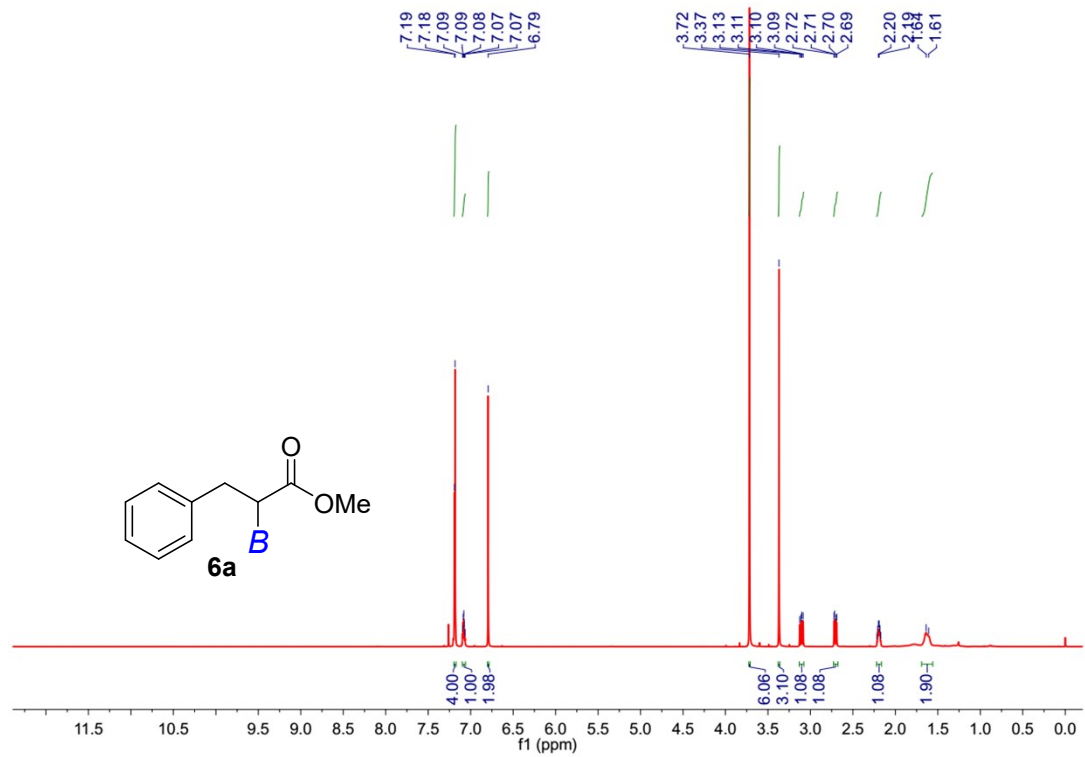

<sup>1</sup>H{<sup>11</sup>B} NMR (600 MHz, CDCl<sub>3</sub>)

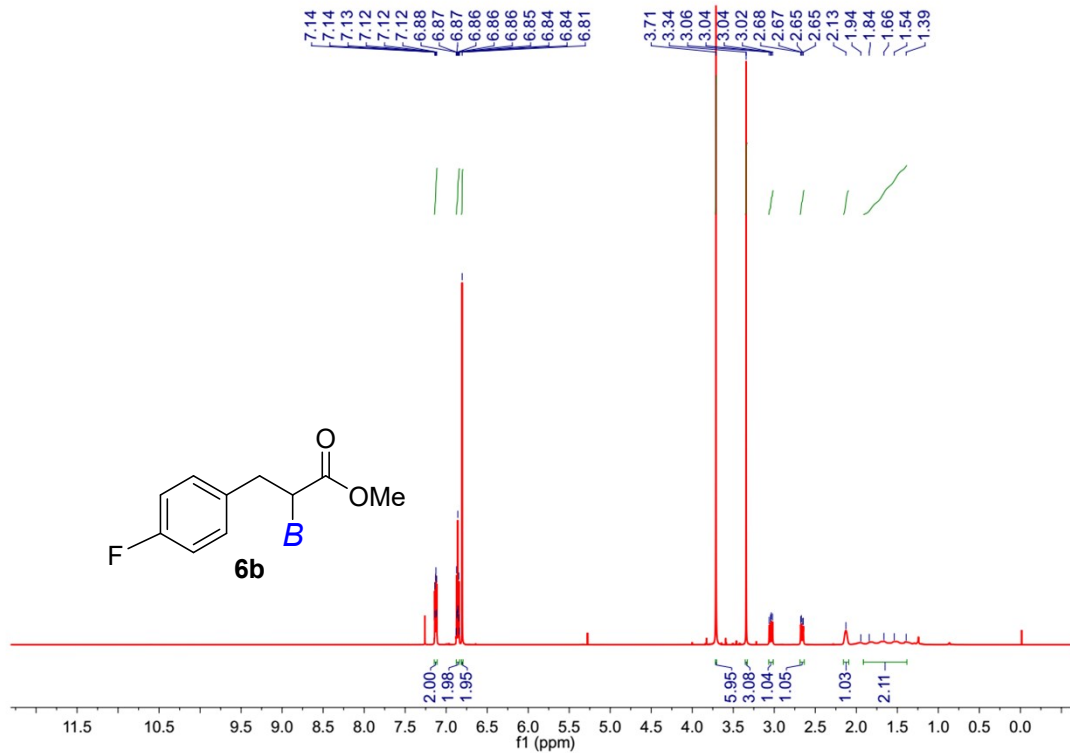

<sup>1</sup>H NMR (600 MHz, CDCl<sub>3</sub>)

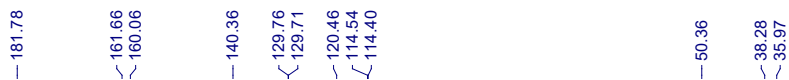

<sup>13</sup>C NMR (151 MHz, CDCl<sub>3</sub>)

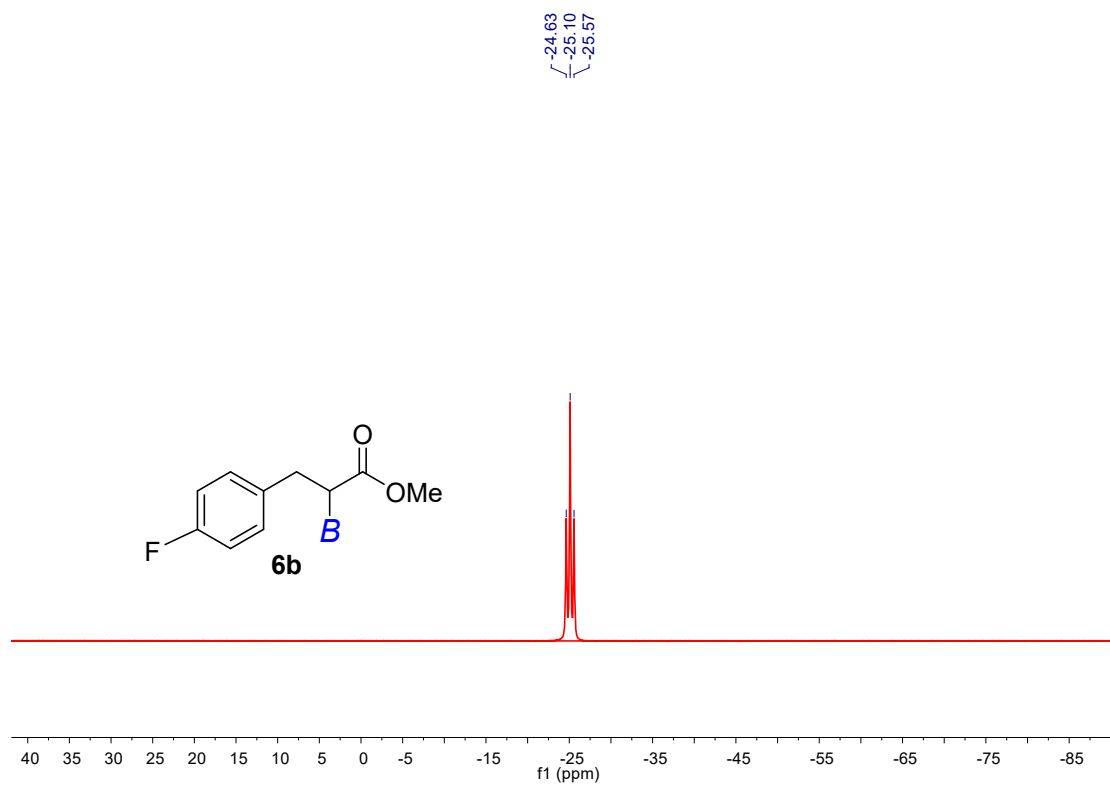

$^{11}\text{B}$  NMR (193 MHz,  $\text{CDCl}_3$ )

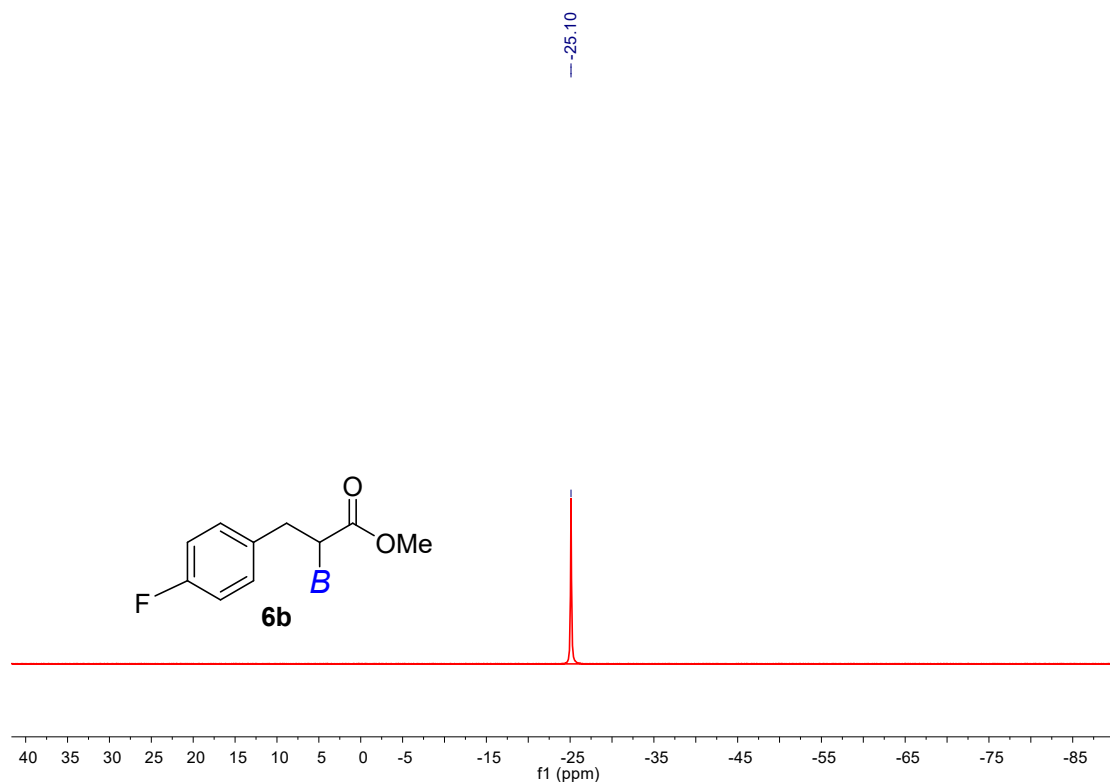

$^{11}\text{B}\{^1\text{H}\}$  NMR (193 MHz,  $\text{CDCl}_3$ )

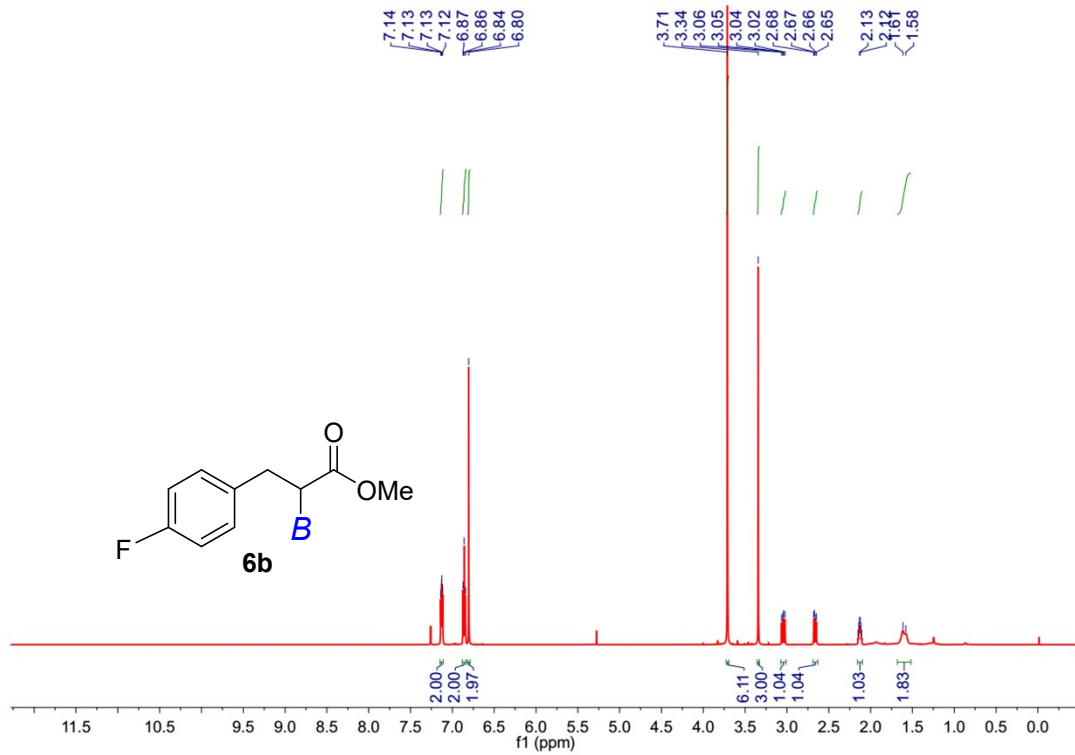

$^1\text{H}\{^{11}\text{B}\}$  NMR (600 MHz,  $\text{CDCl}_3$ )

-119.14

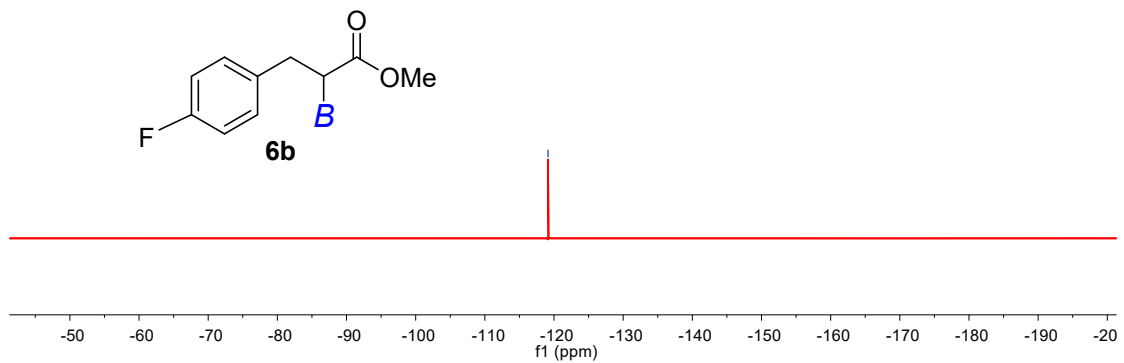

$^{19}\text{F}$  NMR (565 MHz,  $\text{CDCl}_3$ )



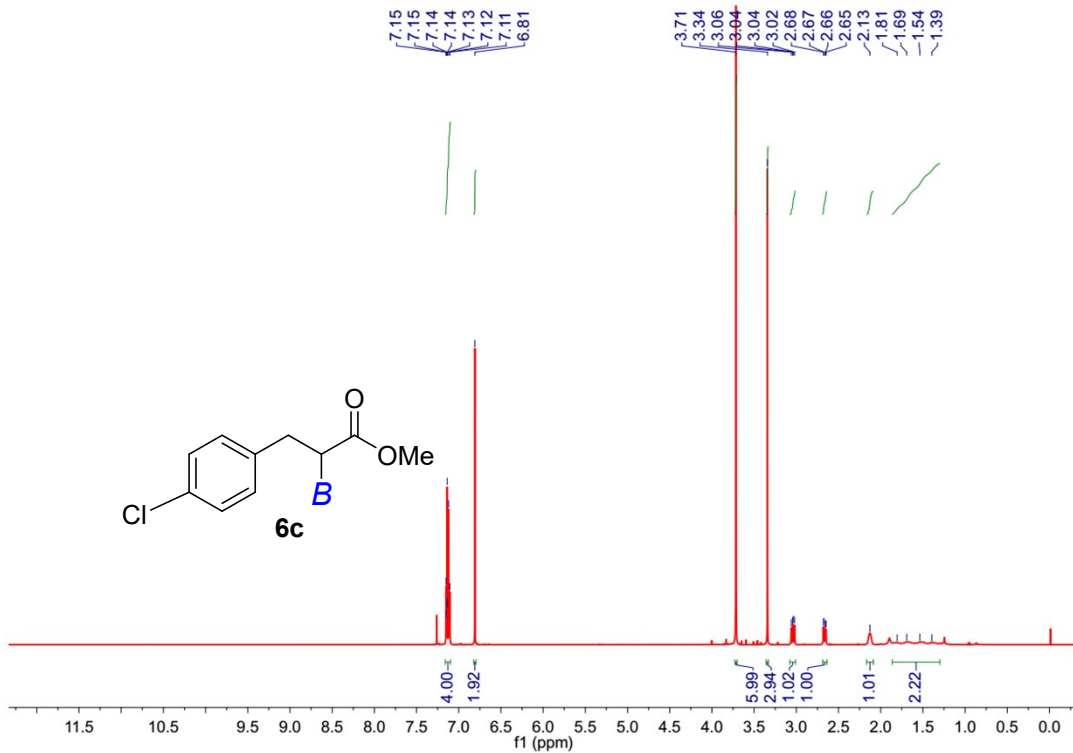

<sup>1</sup>H NMR (600 MHz, CDCl<sub>3</sub>)

— 181.67

— 143.24

— 130.61

— 129.88

— 127.92

— 120.46

— 50.39

— 38.45

— 35.99

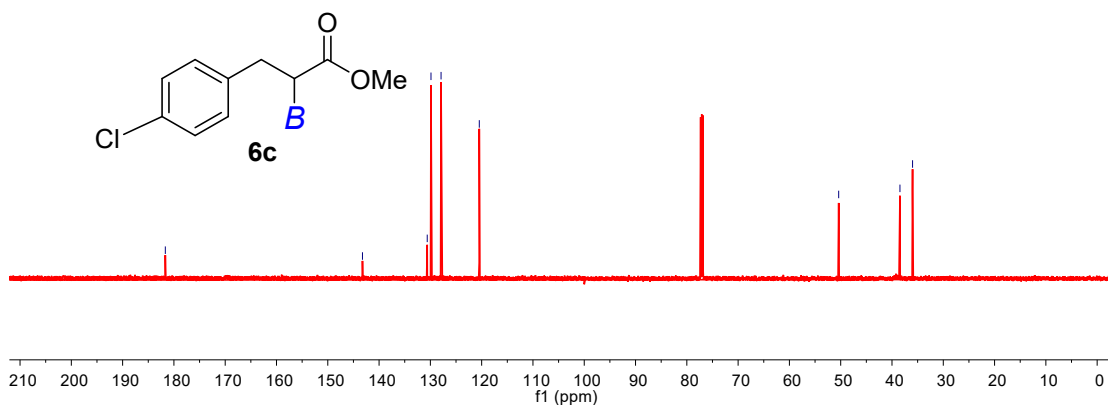

<sup>13</sup>C NMR (151 MHz, CDCl<sub>3</sub>)

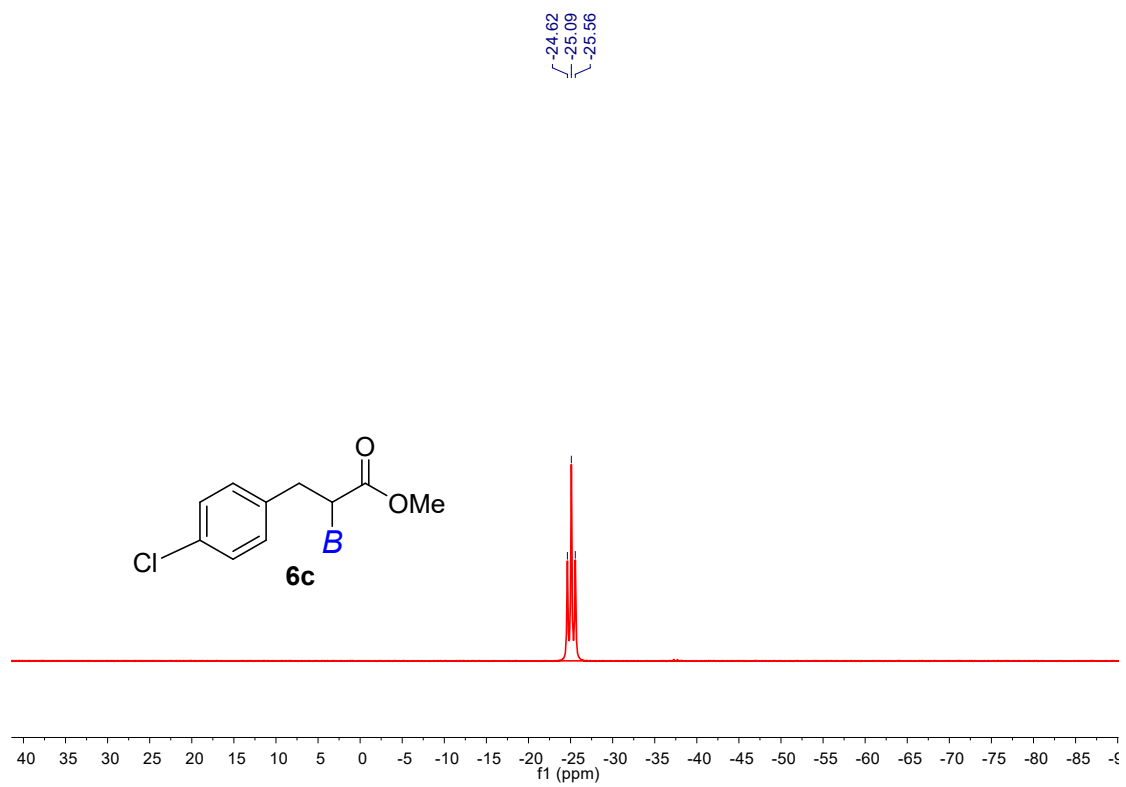

$^{11}\text{B}$  NMR (193 MHz,  $\text{CDCl}_3$ )

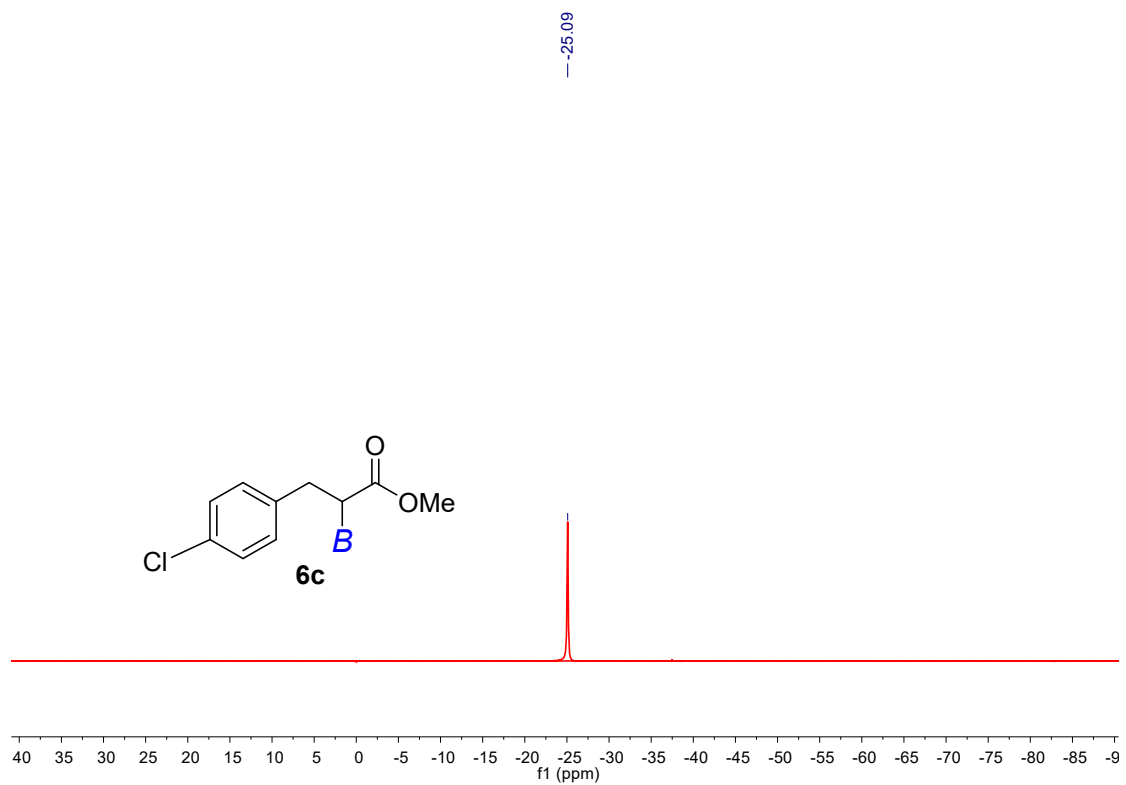

$^{11}\text{B}\{^1\text{H}\}$  NMR (193 MHz,  $\text{CDCl}_3$ )

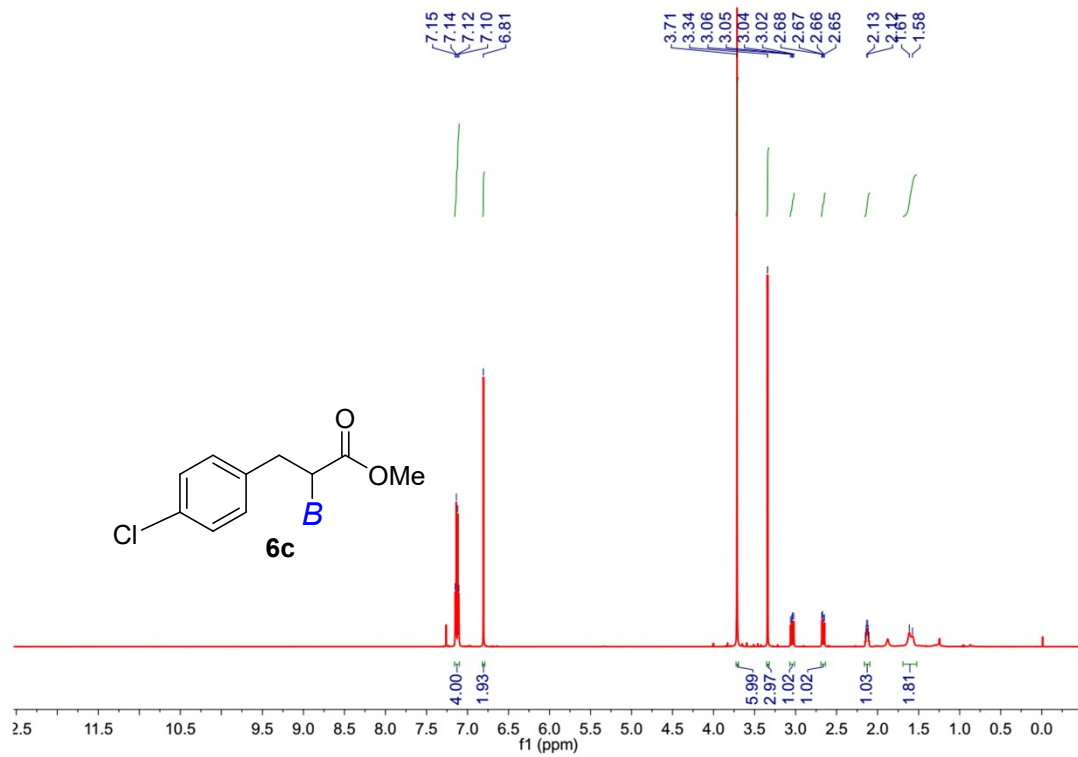

$^1\text{H}\{^{11}\text{B}\}$  NMR (600 MHz,  $\text{CDCl}_3$ )

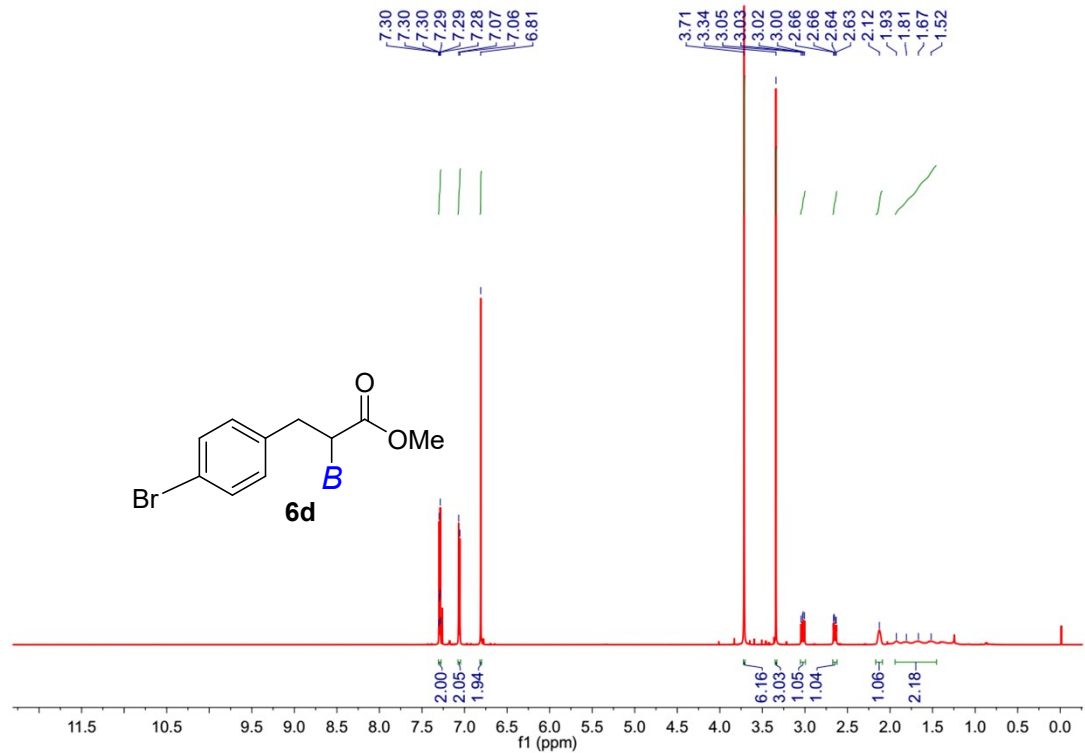

<sup>1</sup>H NMR (600 MHz, CDCl<sub>3</sub>)

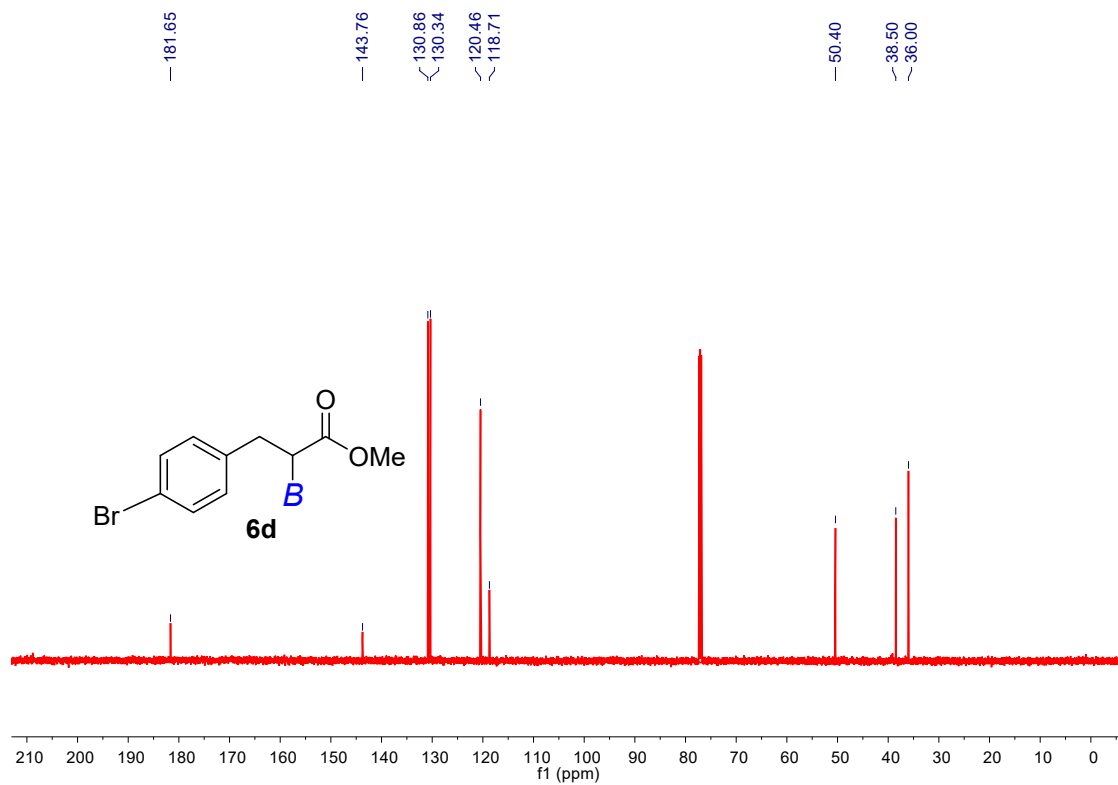

<sup>13</sup>C NMR (151 MHz, CDCl<sub>3</sub>)

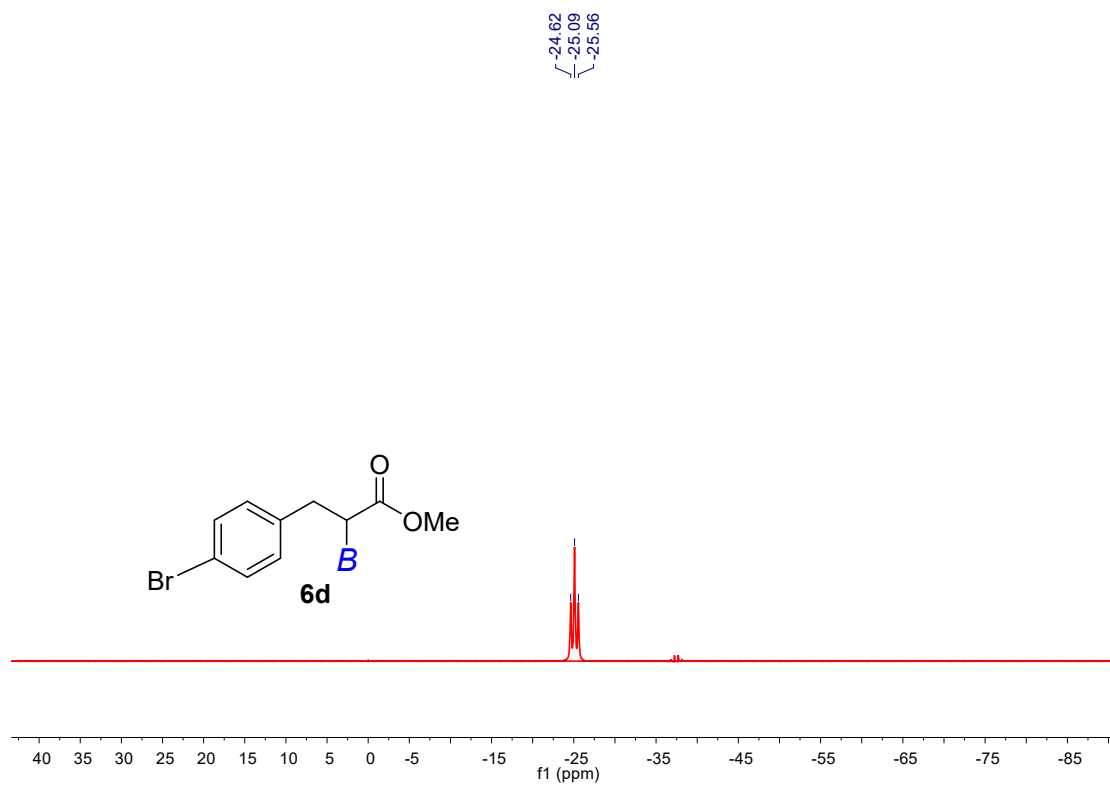

$^{11}\text{B}$  NMR (193 MHz,  $\text{CDCl}_3$ )

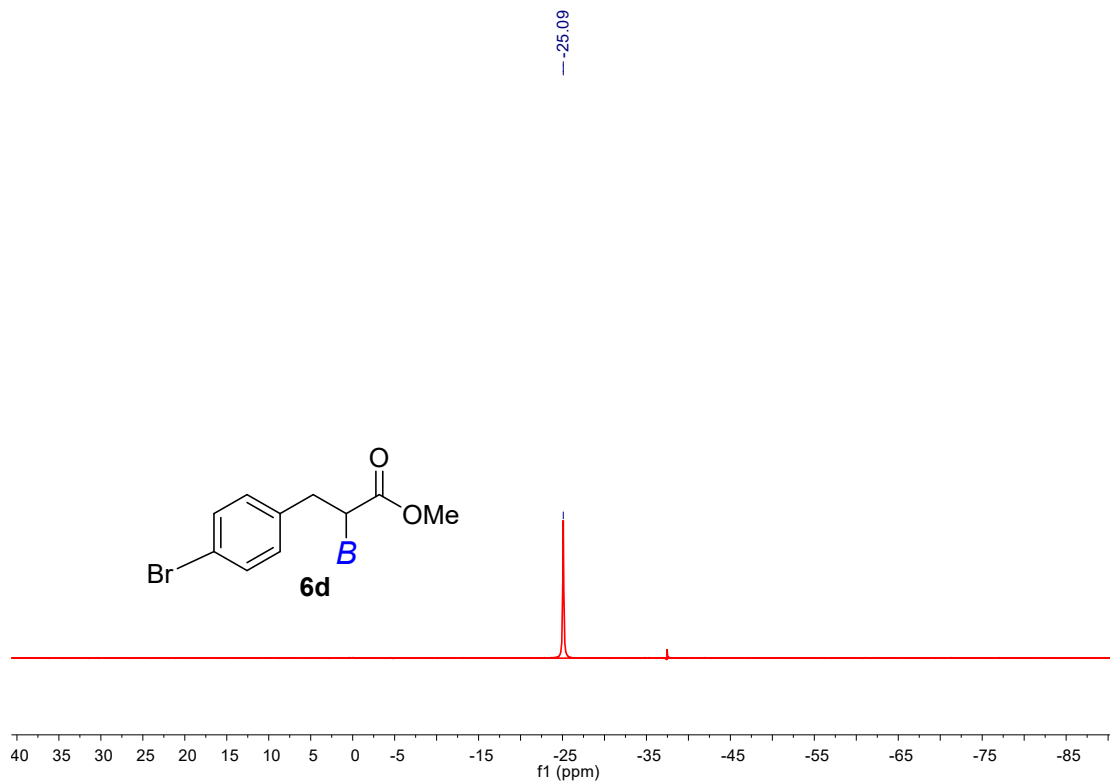

$^{11}\text{B}\{^1\text{H}\}$  NMR (193 MHz,  $\text{CDCl}_3$ )

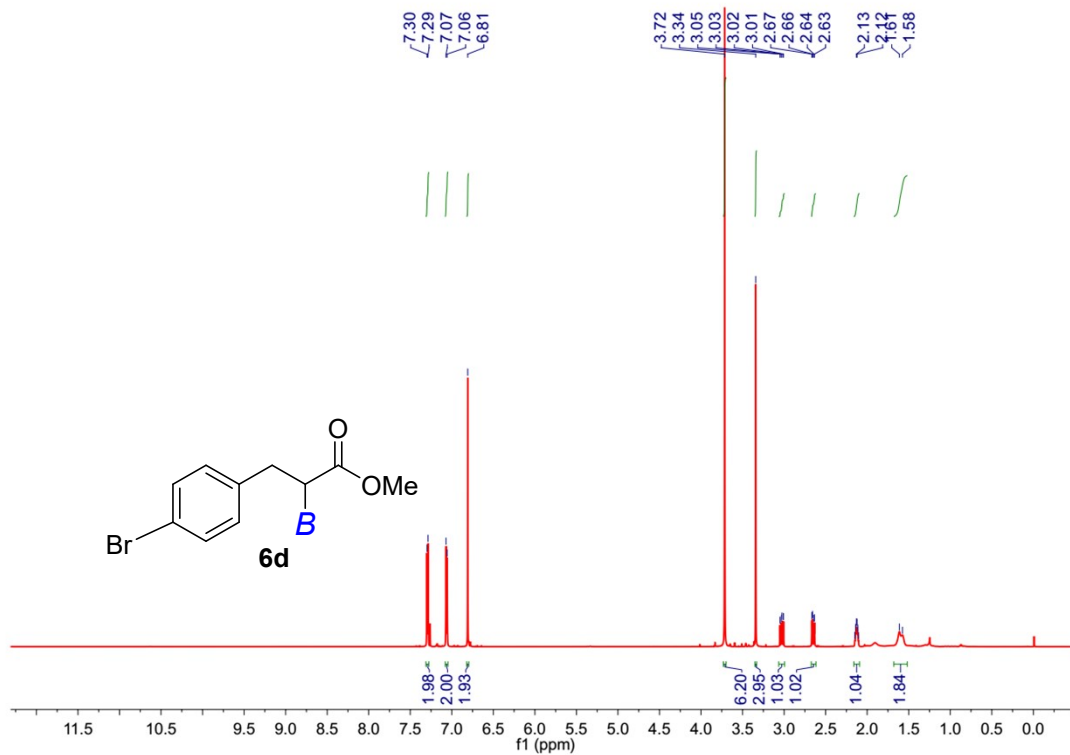

$^1\text{H}\{^{11}\text{B}\}$  NMR (600 MHz,  $\text{CDCl}_3$ )

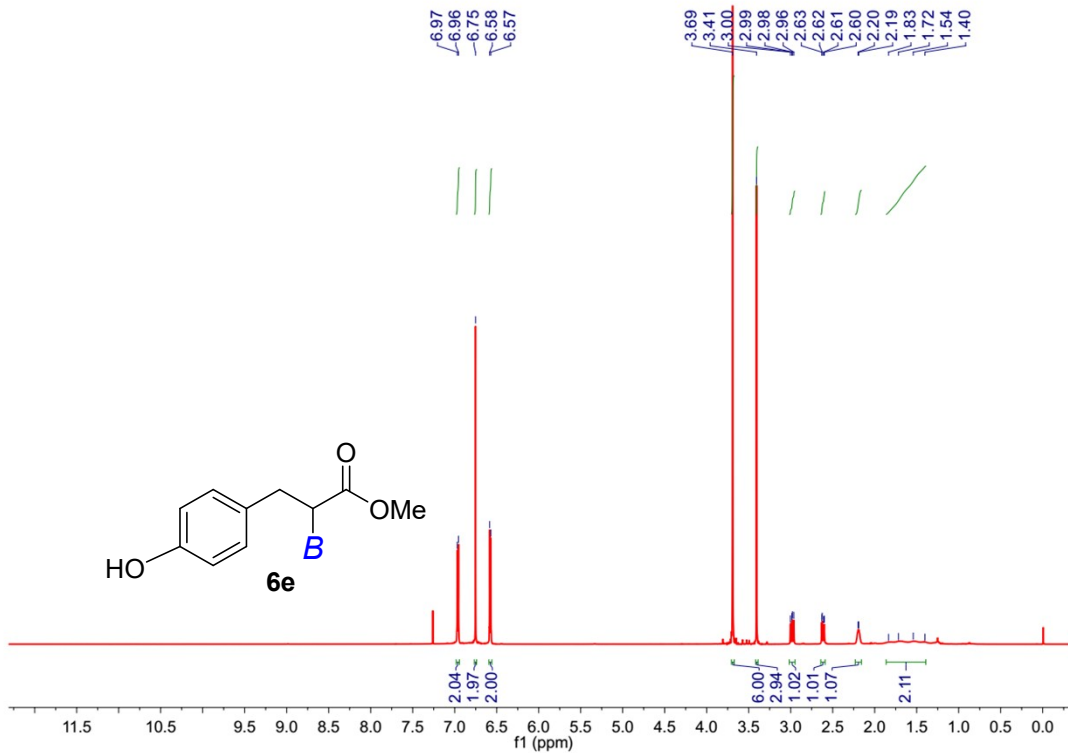

<sup>1</sup>H NMR (600 MHz, CDCl<sub>3</sub>)

183.23, 153.85, 135.92, 129.20, 120.51, 114.91, 50.73, 38.10, 35.94

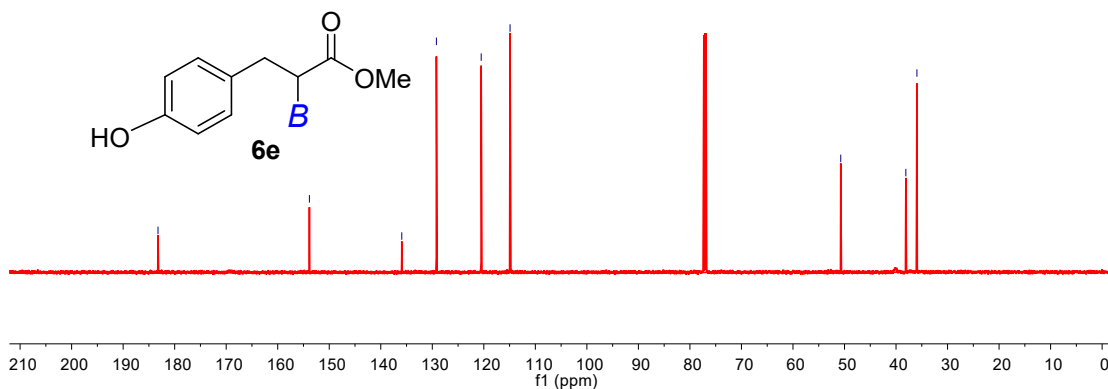

<sup>13</sup>C NMR (151 MHz, CDCl<sub>3</sub>)

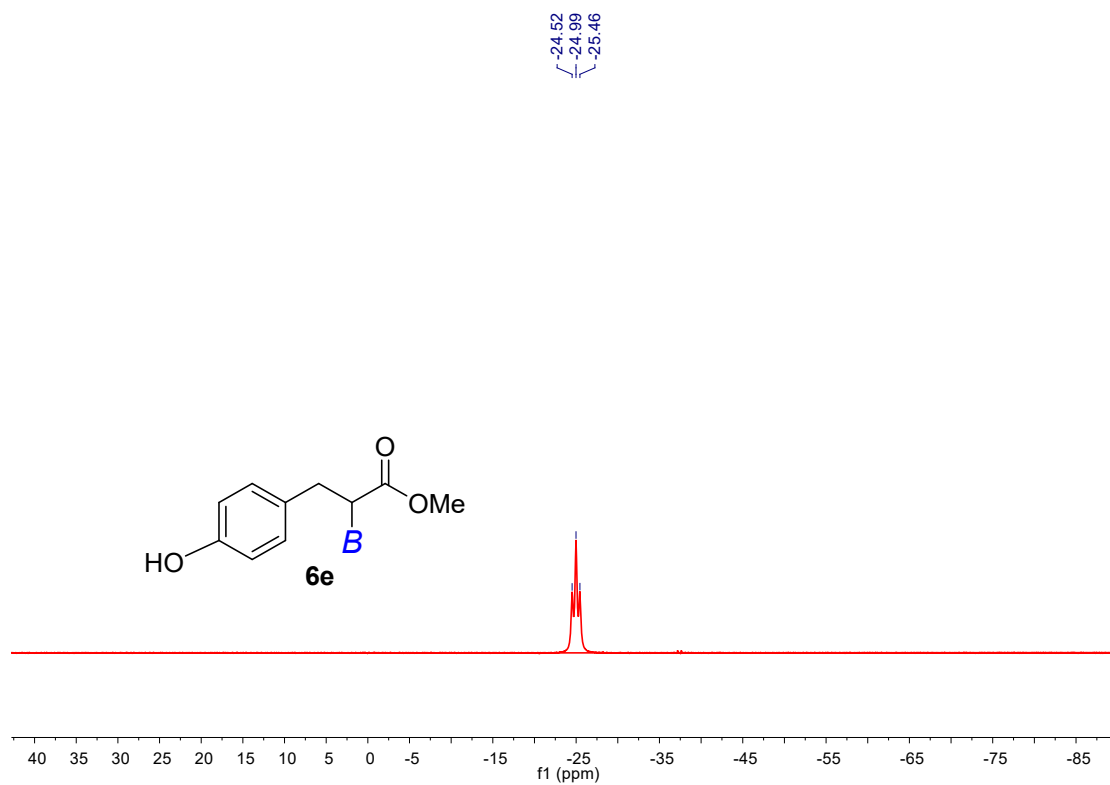

<sup>11</sup>B NMR (193 MHz, CDCl<sub>3</sub>)

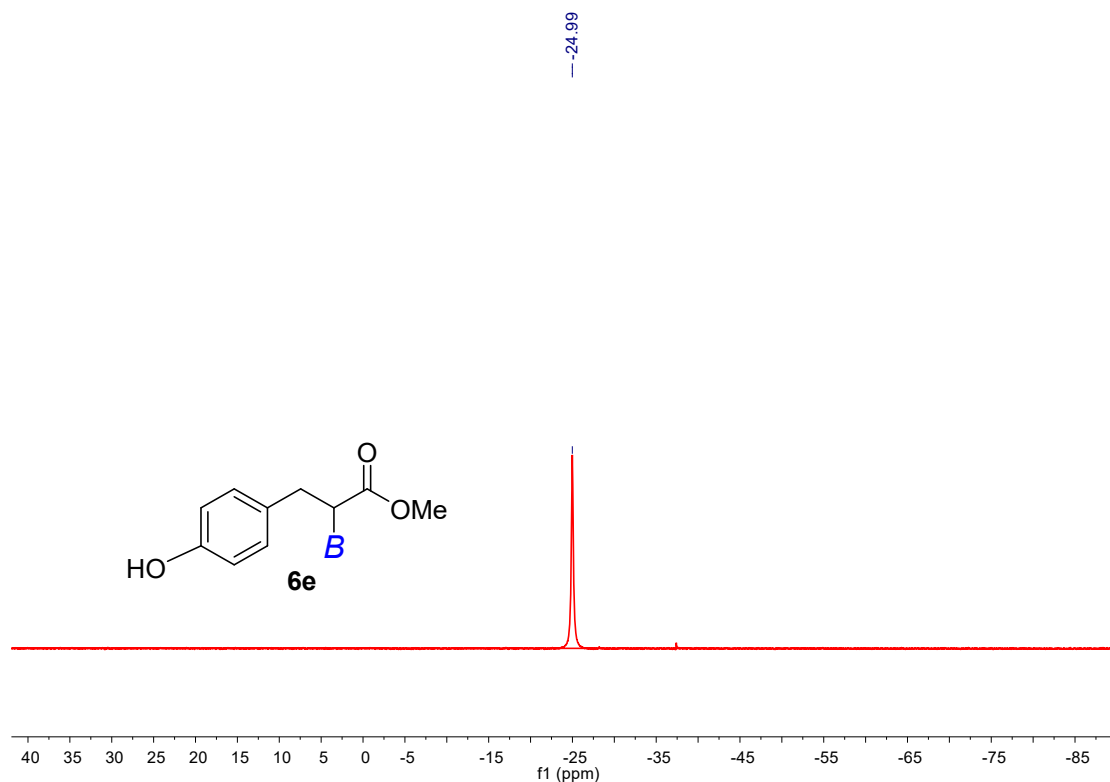

<sup>11</sup>B{<sup>1</sup>H} NMR (193 MHz, CDCl<sub>3</sub>)



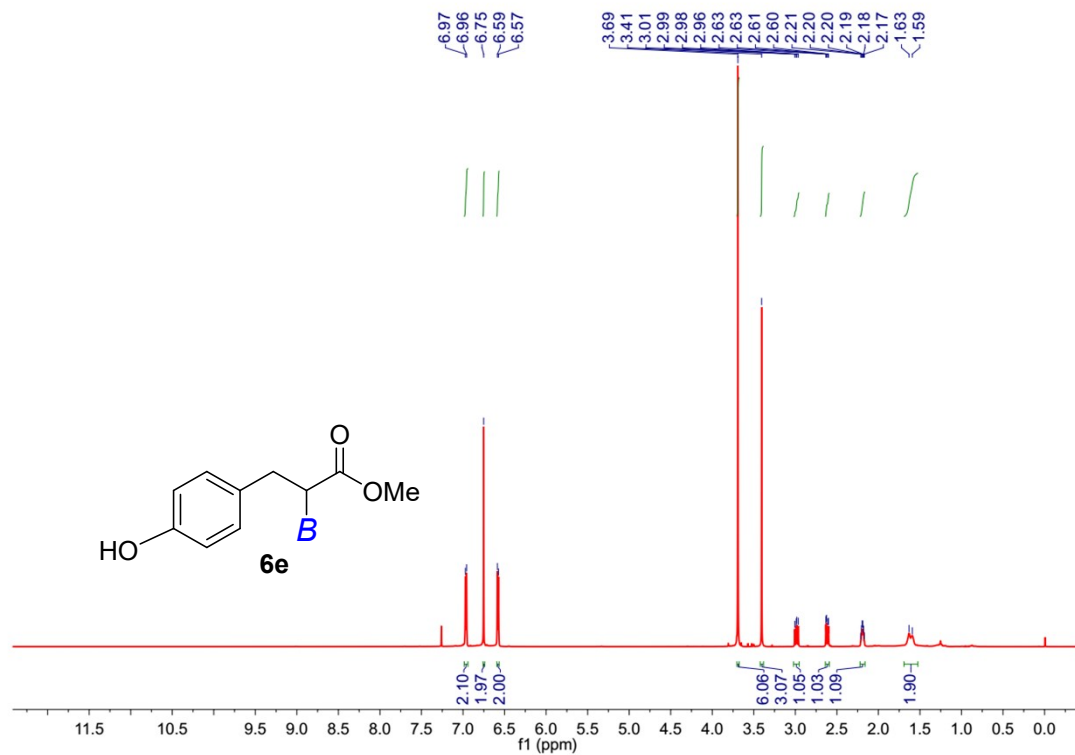

$^1\text{H}\{^{11}\text{B}\}$  NMR (600 MHz,  $\text{CDCl}_3$ )

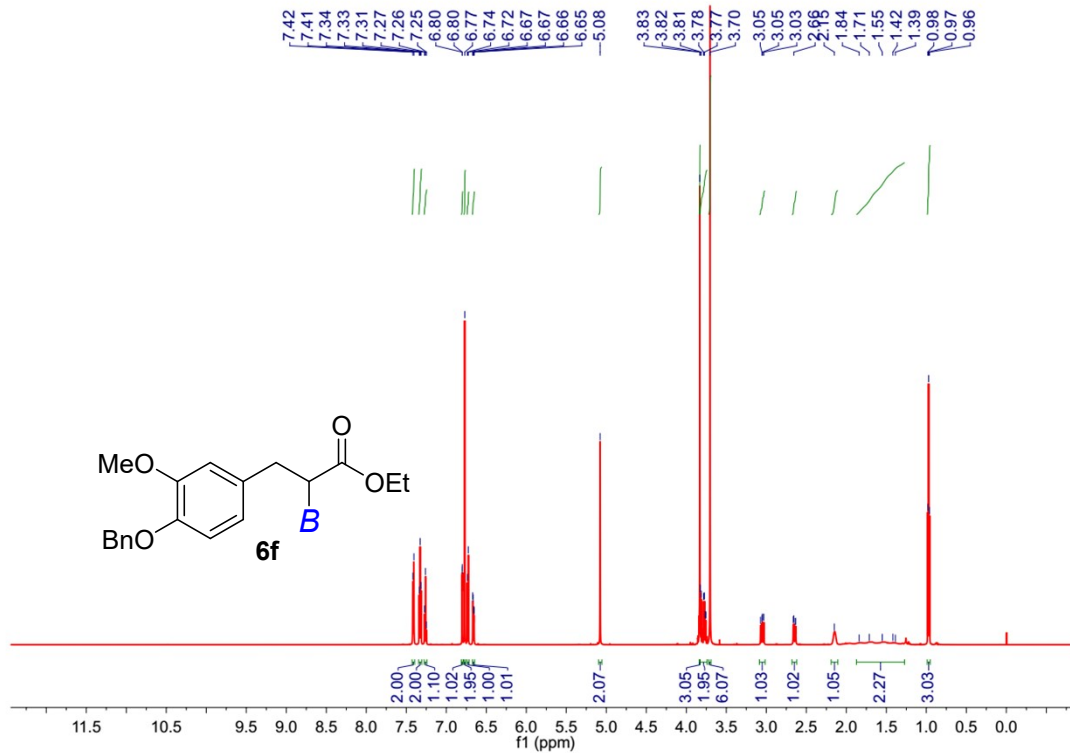

**1H NMR (600 MHz, CDCl<sub>3</sub>)**

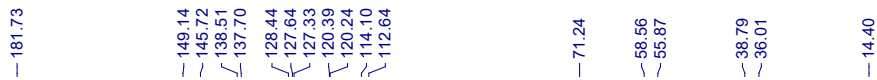

**13C NMR (151 MHz, CDCl<sub>3</sub>)**

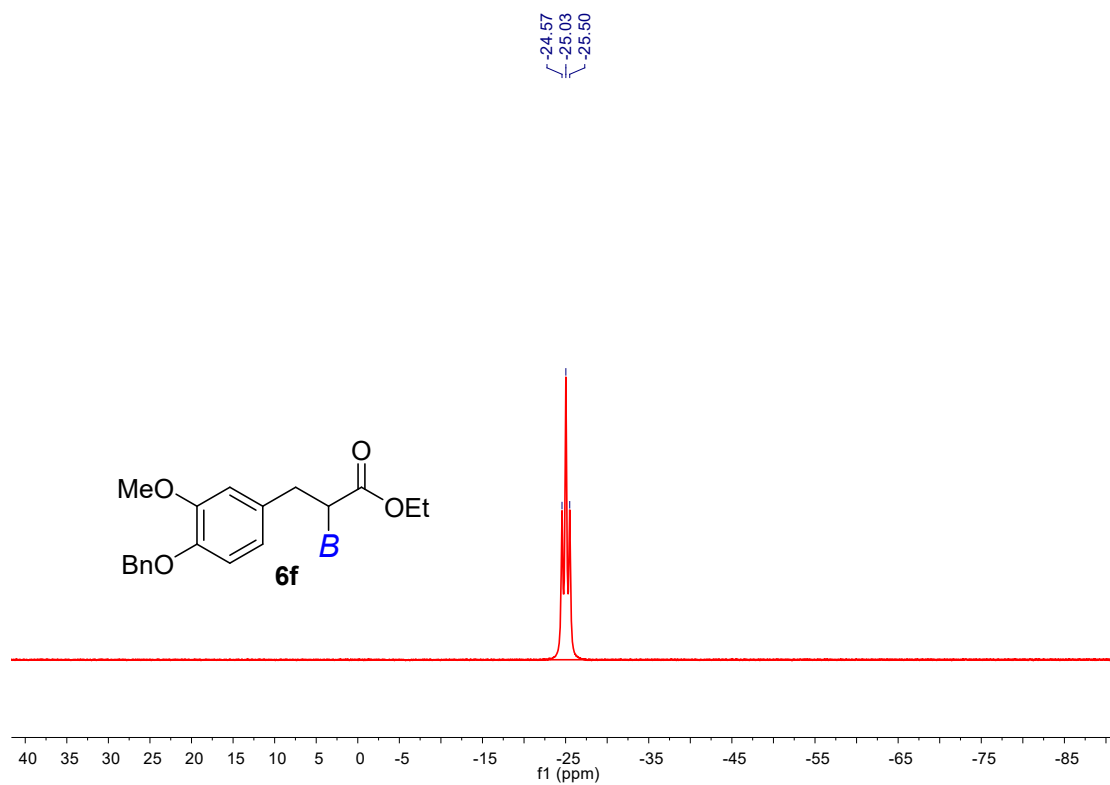

$^{11}\text{B}$  NMR (193 MHz,  $\text{CDCl}_3$ )

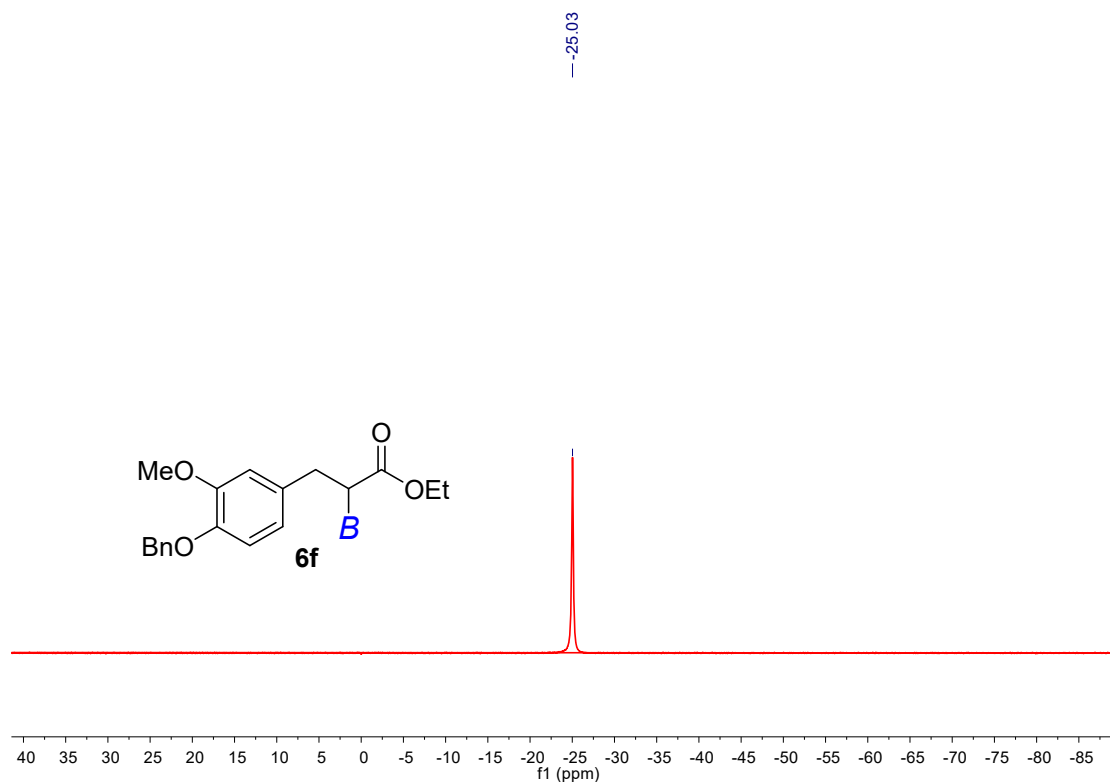

$^{11}\text{B}\{^1\text{H}\}$  NMR (193 MHz,  $\text{CDCl}_3$ )

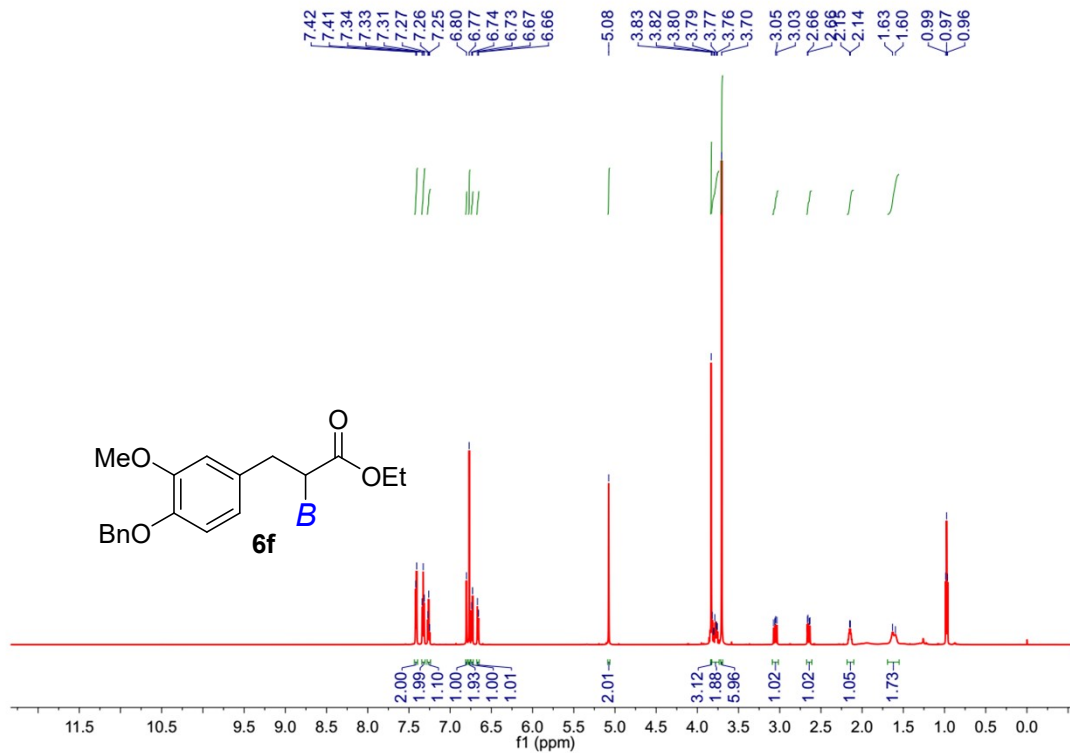

$^1\text{H}\{^{11}\text{B}\}$  NMR (600 MHz,  $\text{CDCl}_3$ )

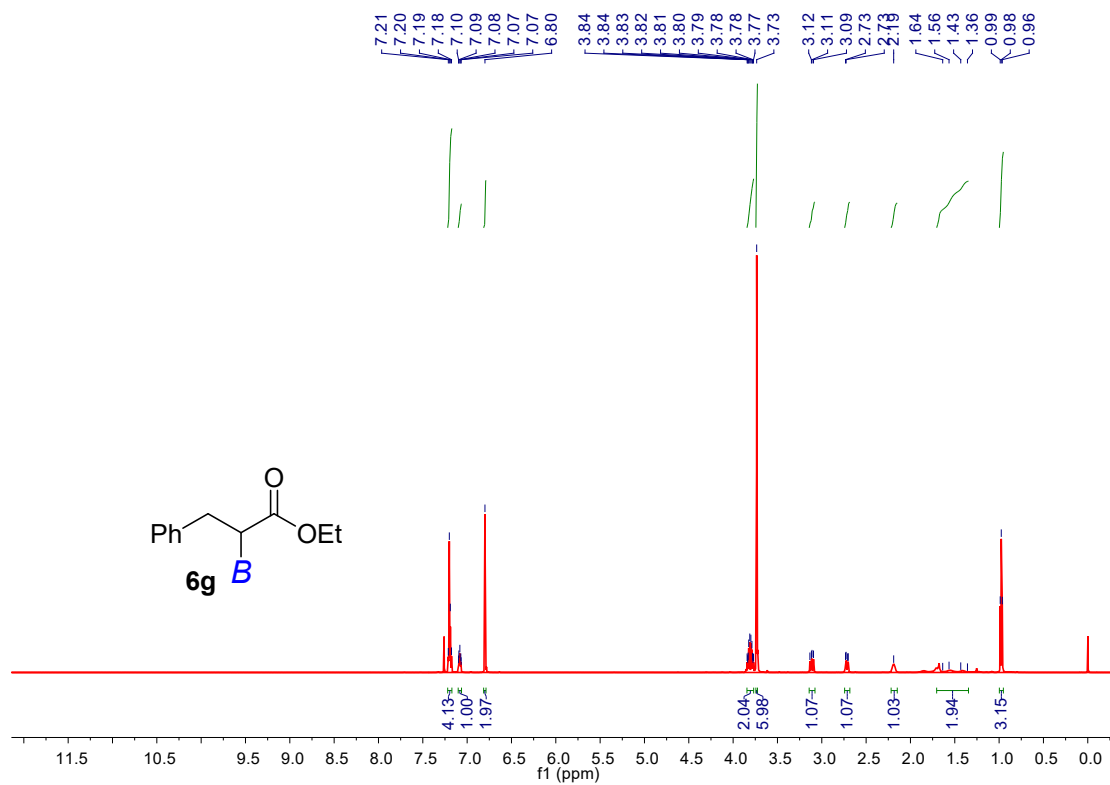

<sup>1</sup>H NMR (600 MHz, CDCl<sub>3</sub>)

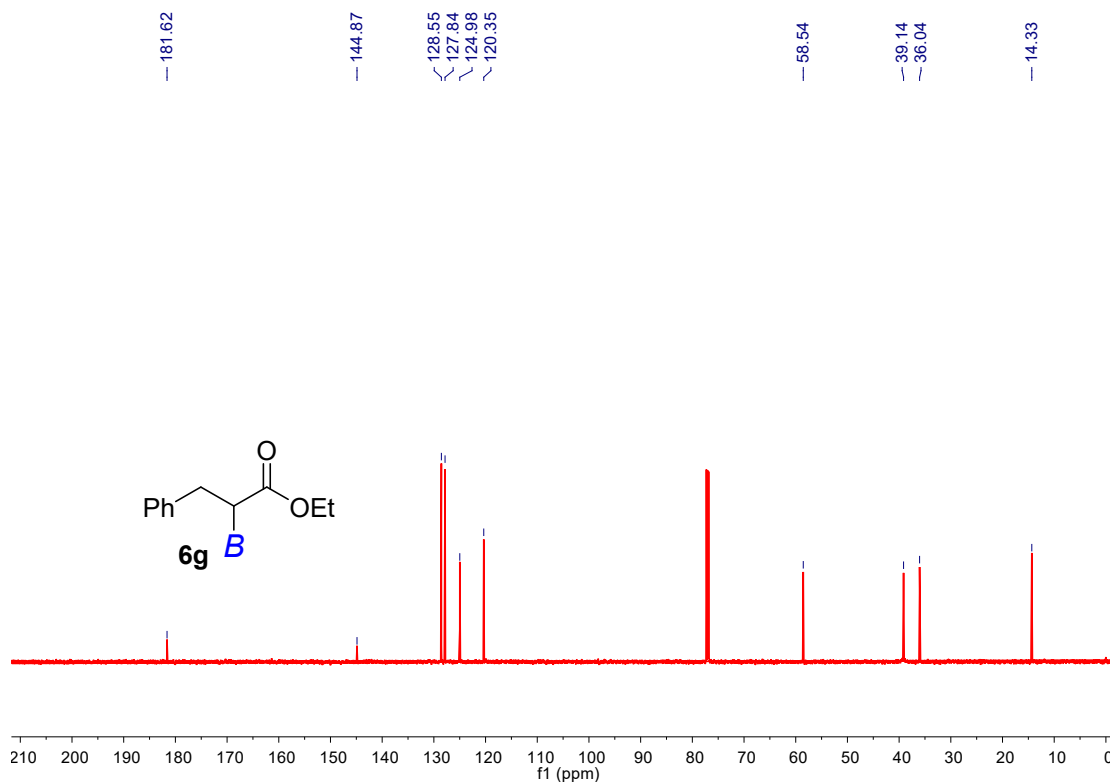

<sup>13</sup>C NMR (151 MHz, CDCl<sub>3</sub>)

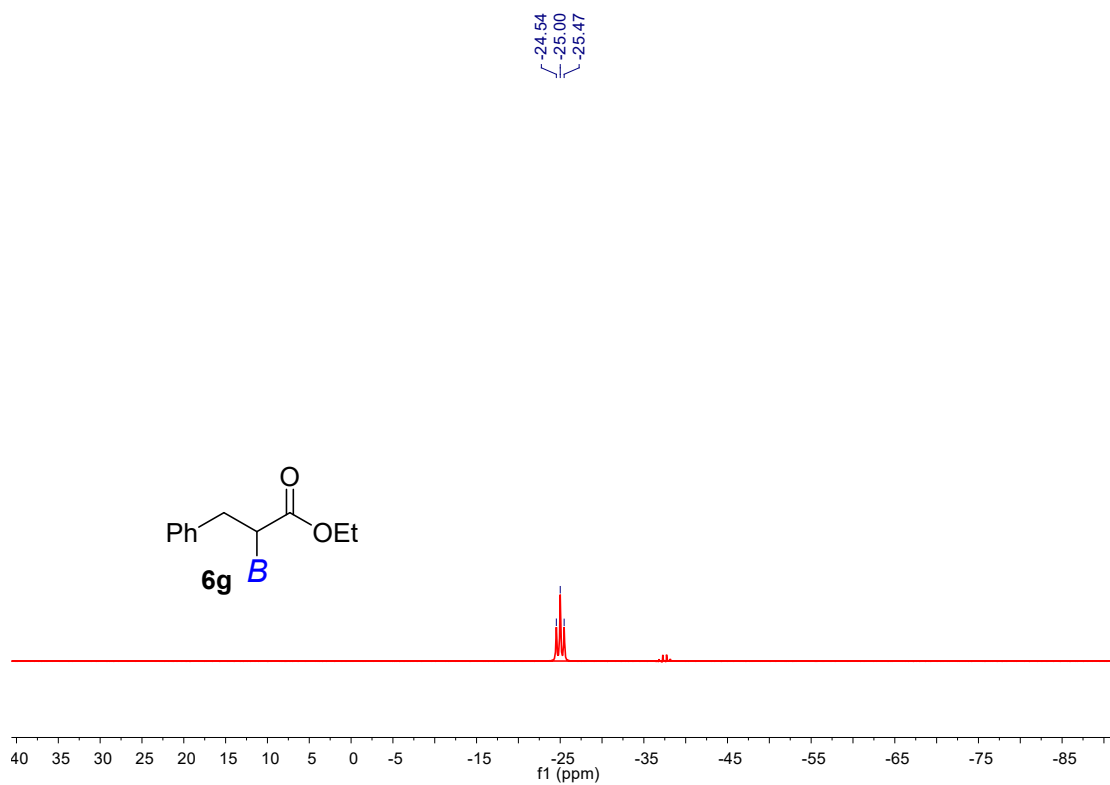

$^{11}\text{B}$  NMR (193 MHz,  $\text{CDCl}_3$ )

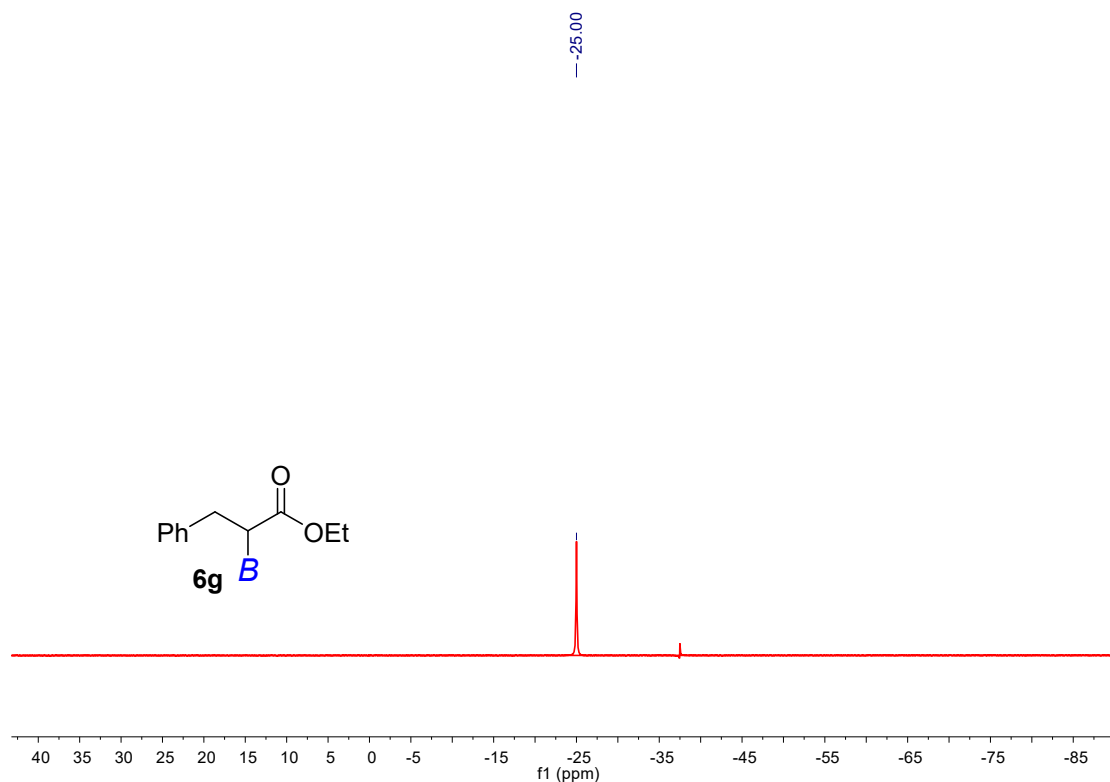

$^{11}\text{B}\{^1\text{H}\}$  NMR (193 MHz,  $\text{CDCl}_3$ )

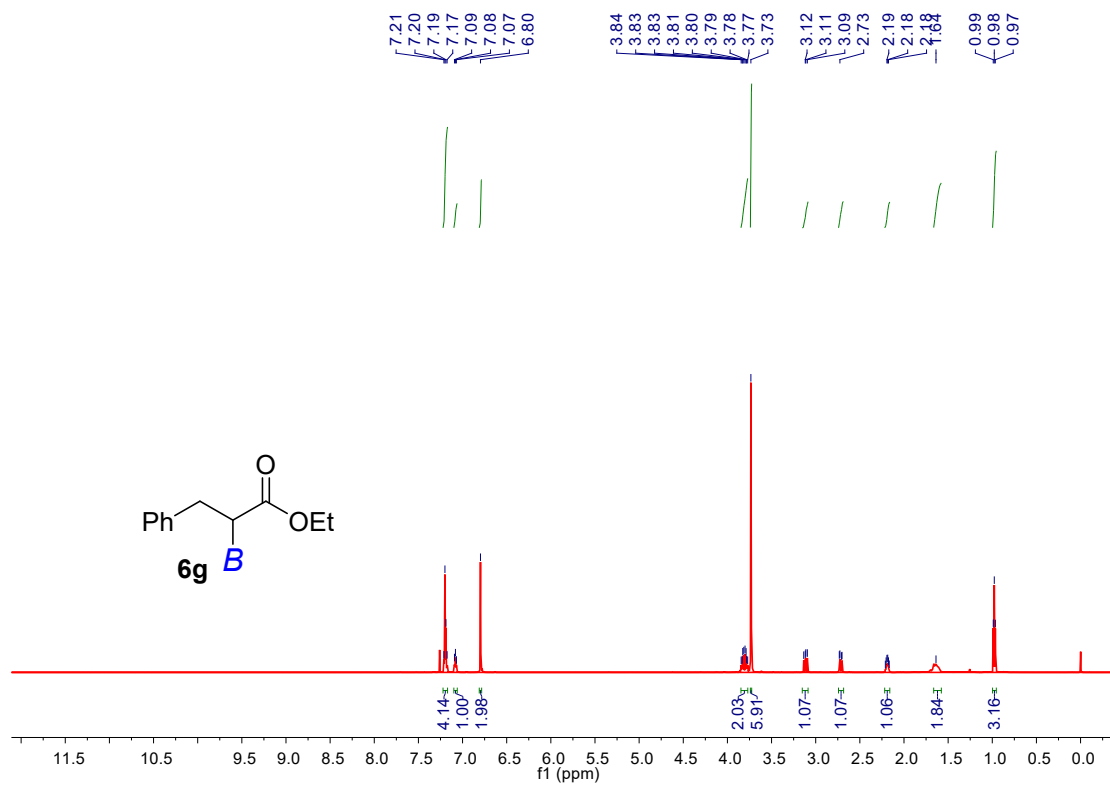

$^1\text{H}\{^{11}\text{B}\}$  NMR (600 MHz,  $\text{CDCl}_3$ )

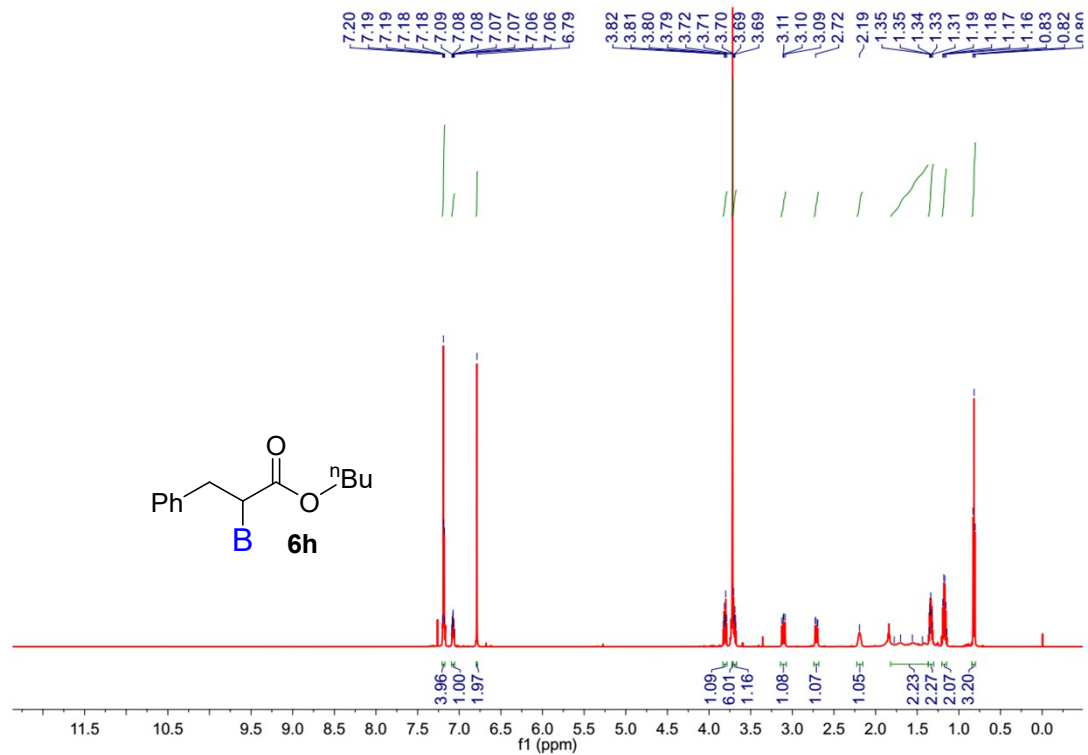

— 181.75  
 — 144.83  
 — 128.49  
 — 127.83  
 — 124.98  
 — 120.38  
 — 62.67  
 — 39.16  
 — 36.01  
 — 30.93  
 — 19.14  
 — 13.79

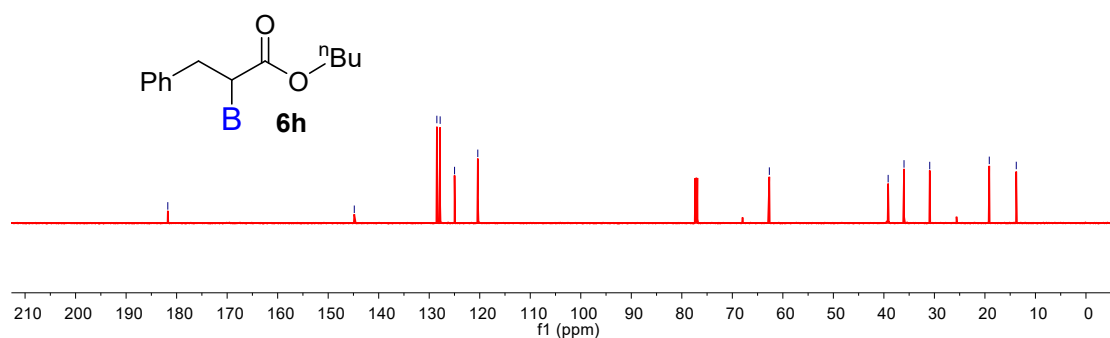

— 181.75  
 — 144.83  
 — 128.49  
 — 127.83  
 — 124.98  
 — 120.38  
 — 62.67  
 — 39.16  
 — 36.01  
 — 30.93  
 — 19.14  
 — 13.79



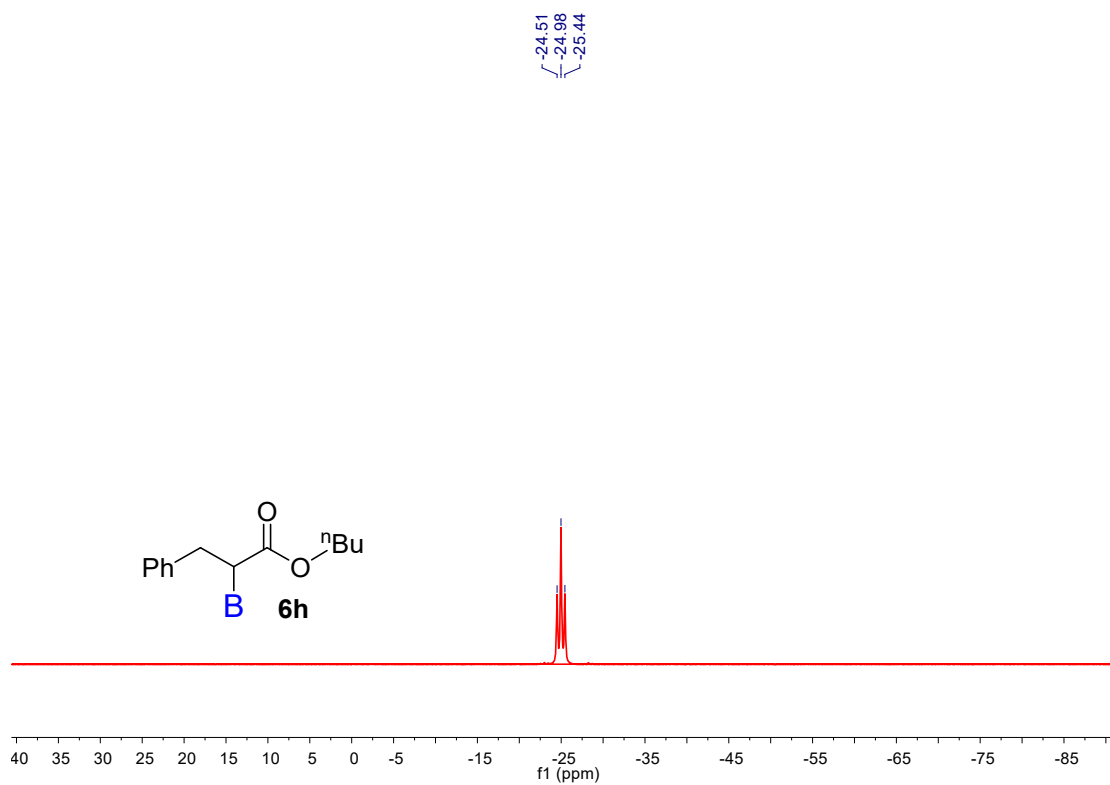

$^{11}\text{B}$  NMR (193 MHz,  $\text{CDCl}_3$ )

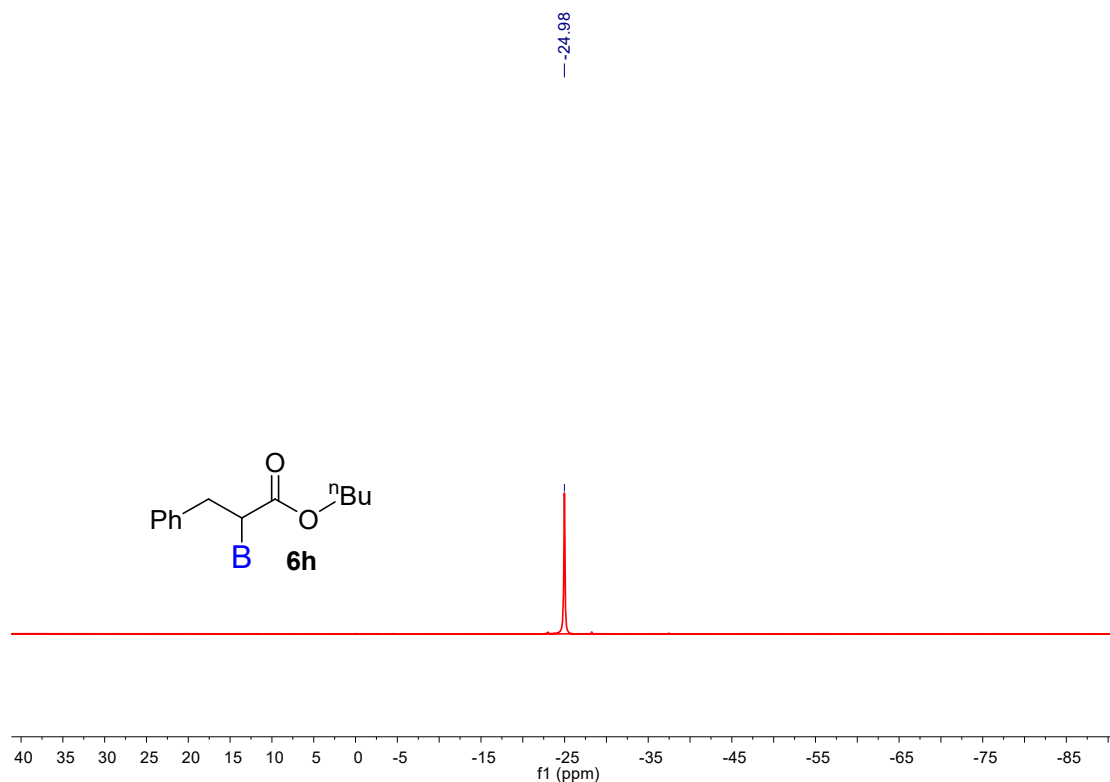

$^{11}\text{B}\{^1\text{H}\}$  NMR (193 MHz,  $\text{CDCl}_3$ )

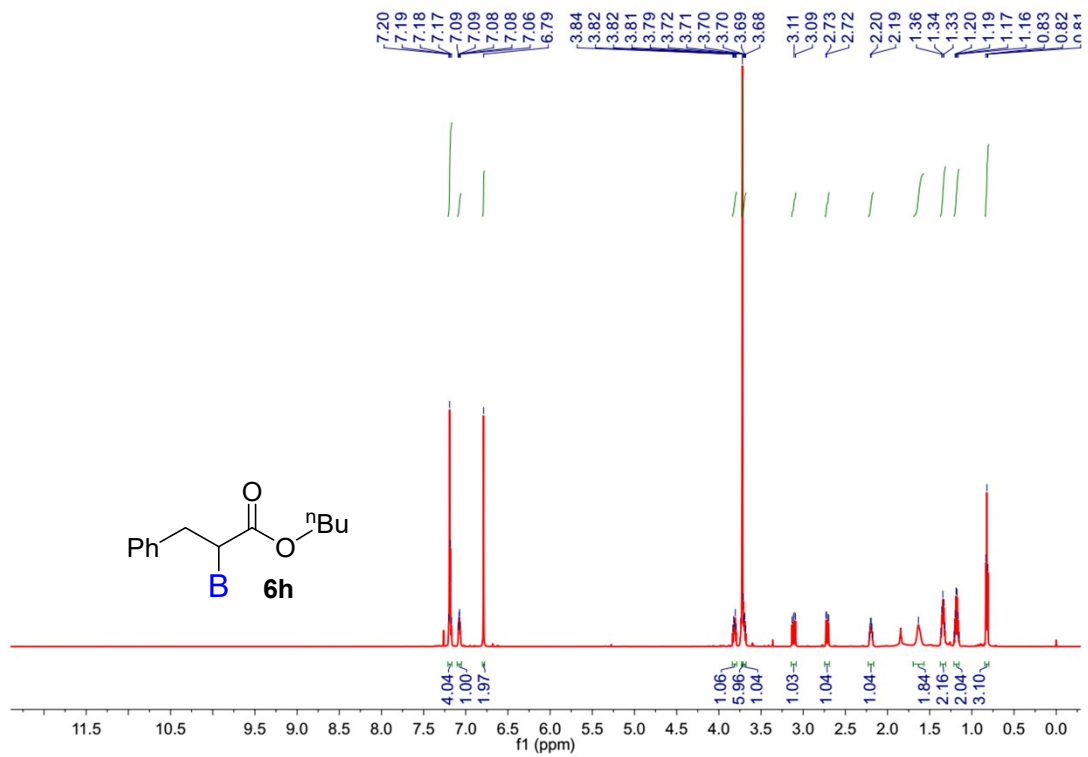

$^1\text{H}\{^{11}\text{B}\}$  NMR (600 MHz,  $\text{CDCl}_3$ )

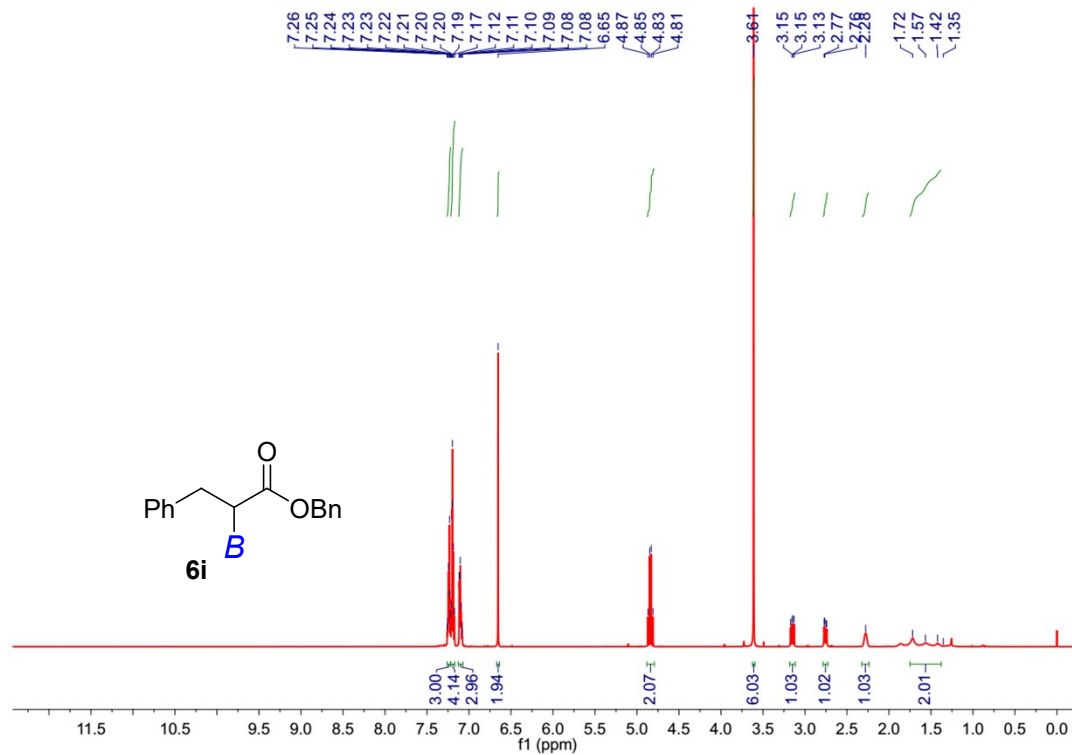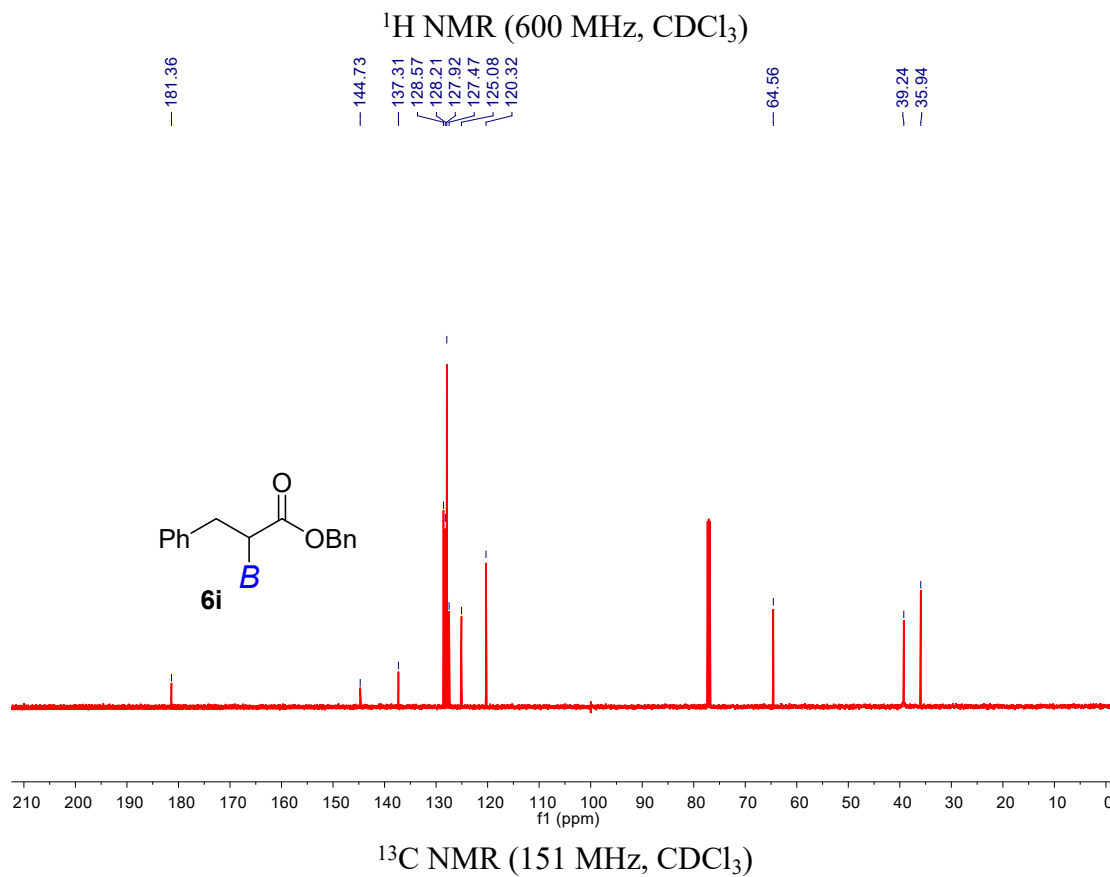

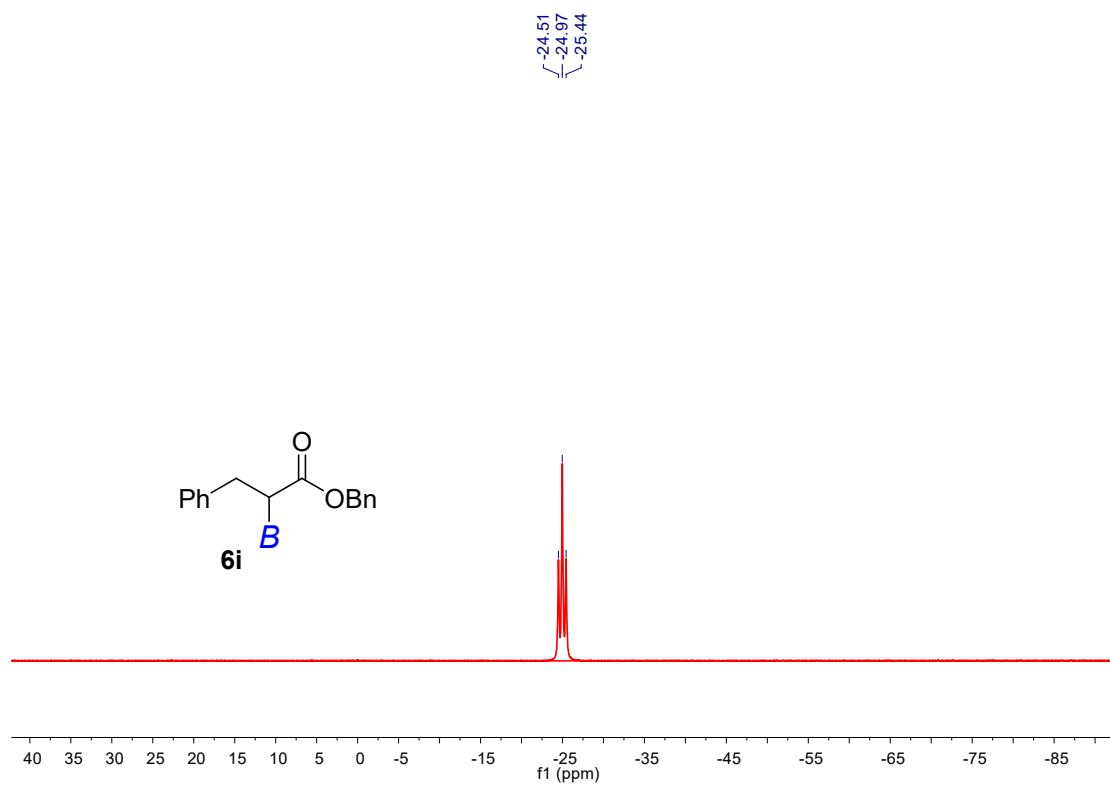

$^{11}\text{B}$  NMR (193 MHz,  $\text{CDCl}_3$ )

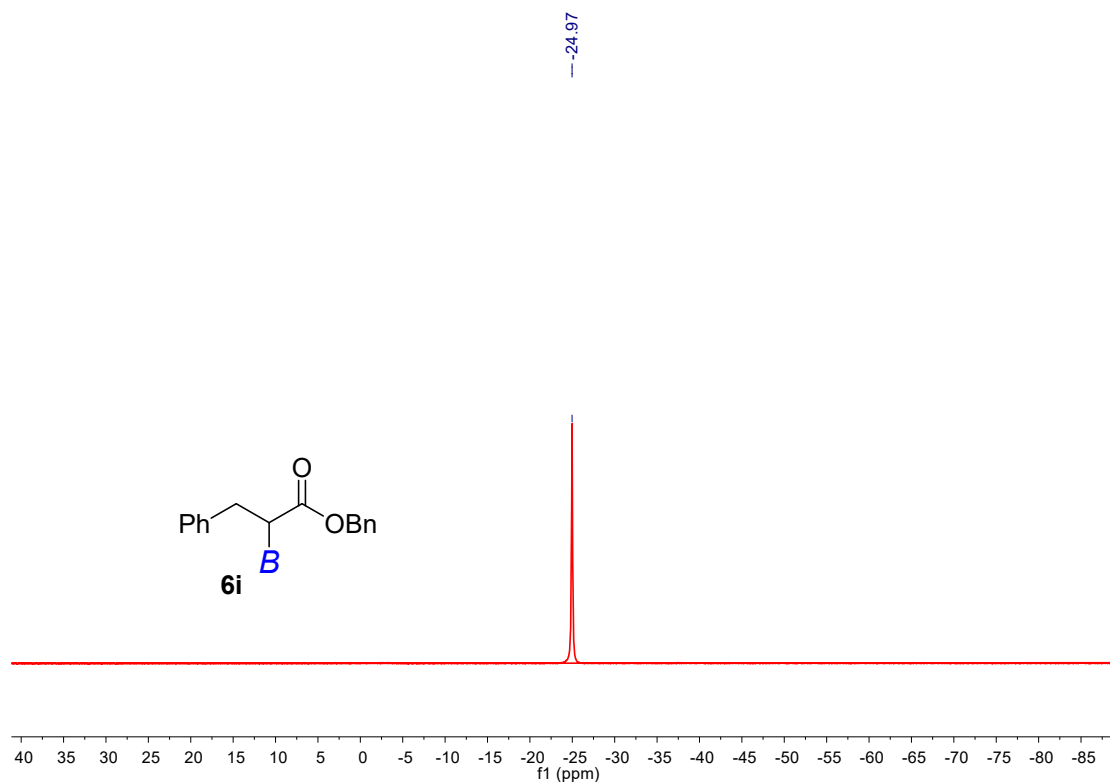

$^{11}\text{B}\{^1\text{H}\}$  NMR (193 MHz,  $\text{CDCl}_3$ )

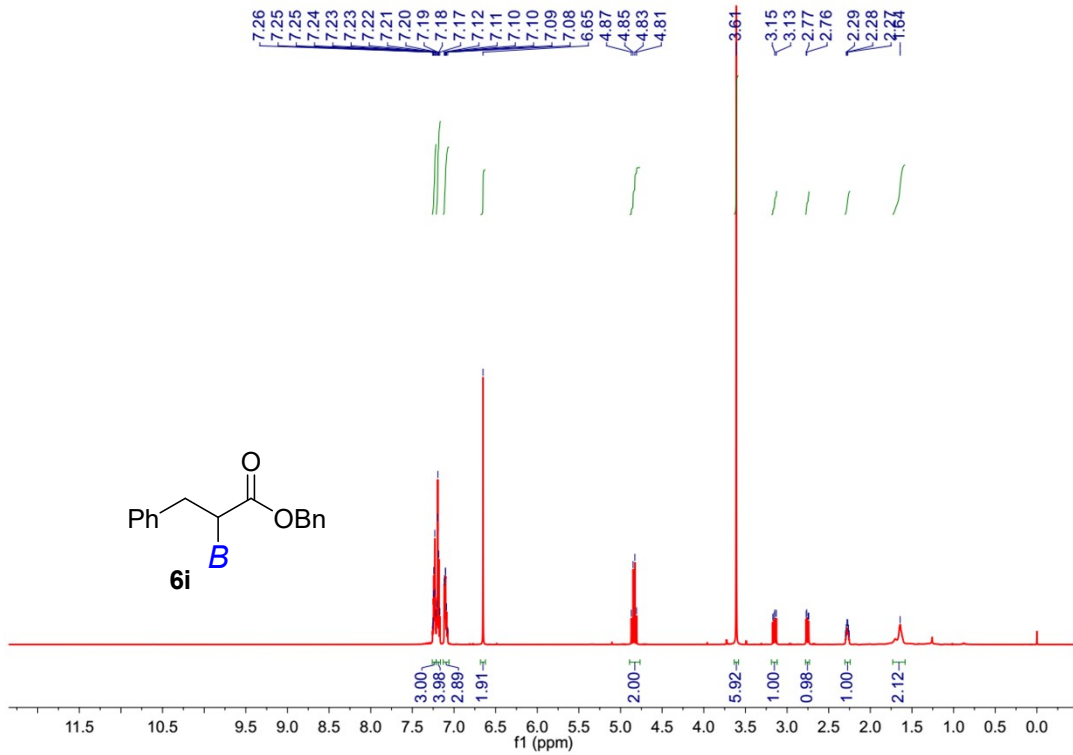

$^1\text{H}\{^{11}\text{B}\}$  NMR (600 MHz,  $\text{CDCl}_3$ )

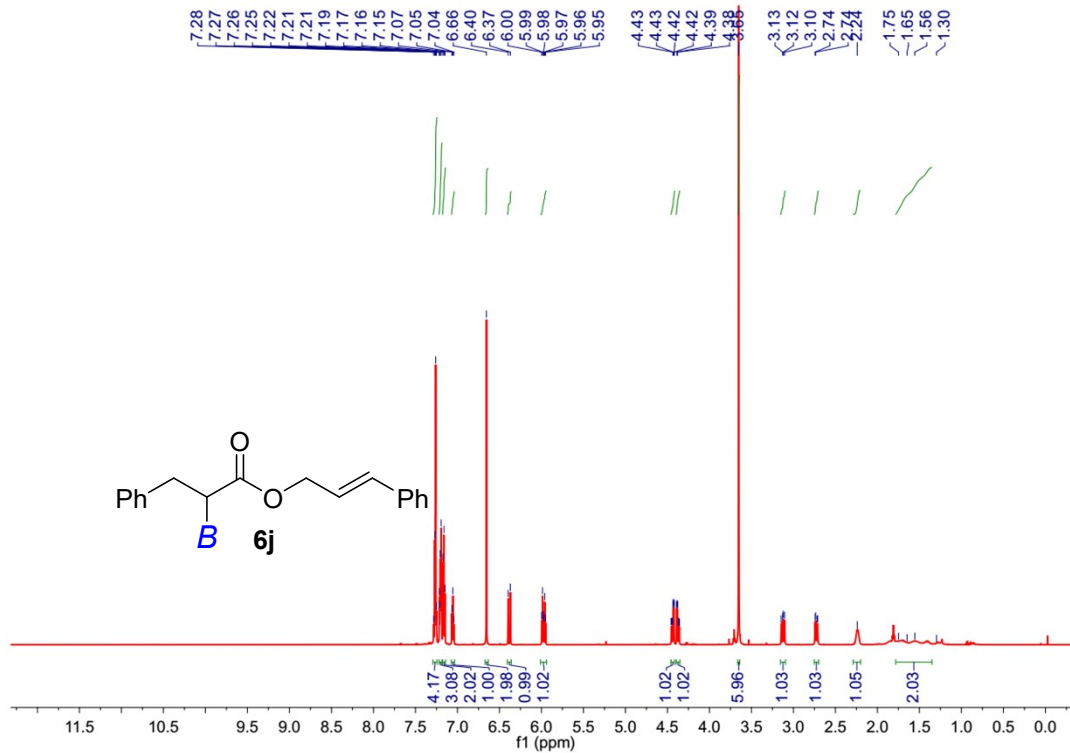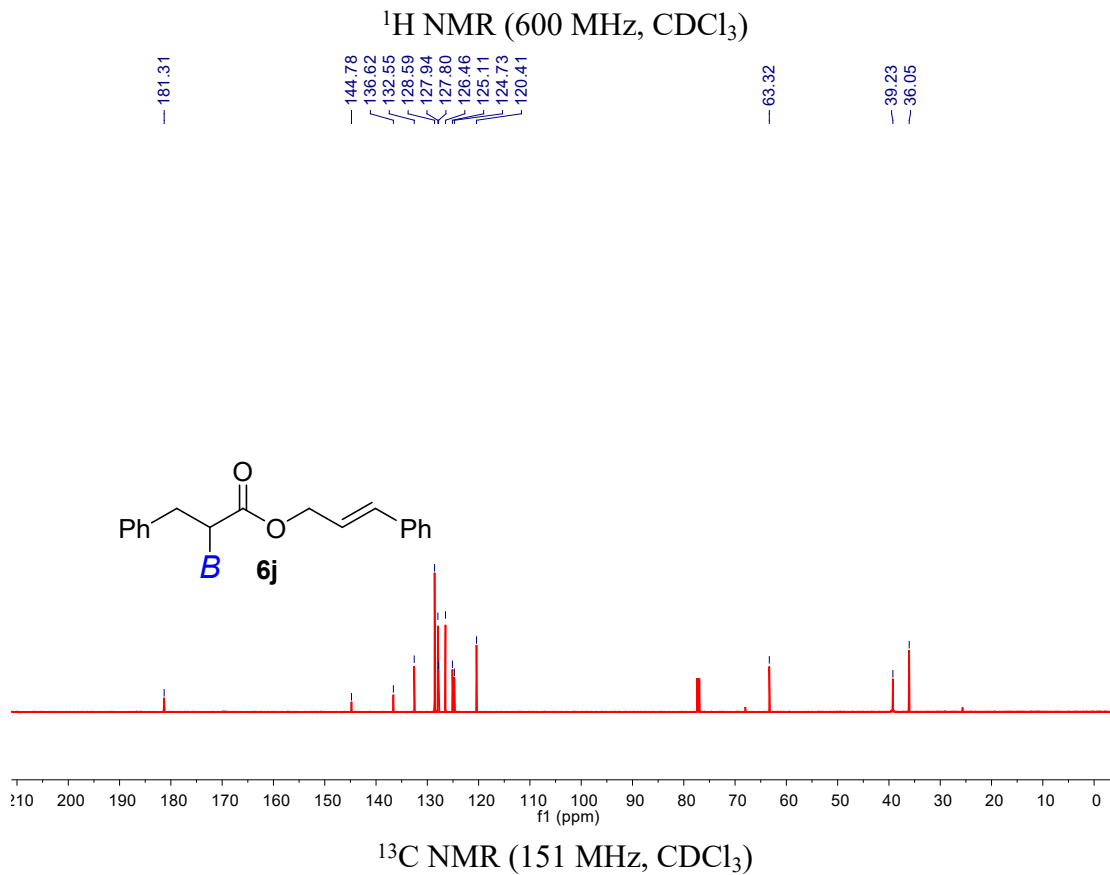

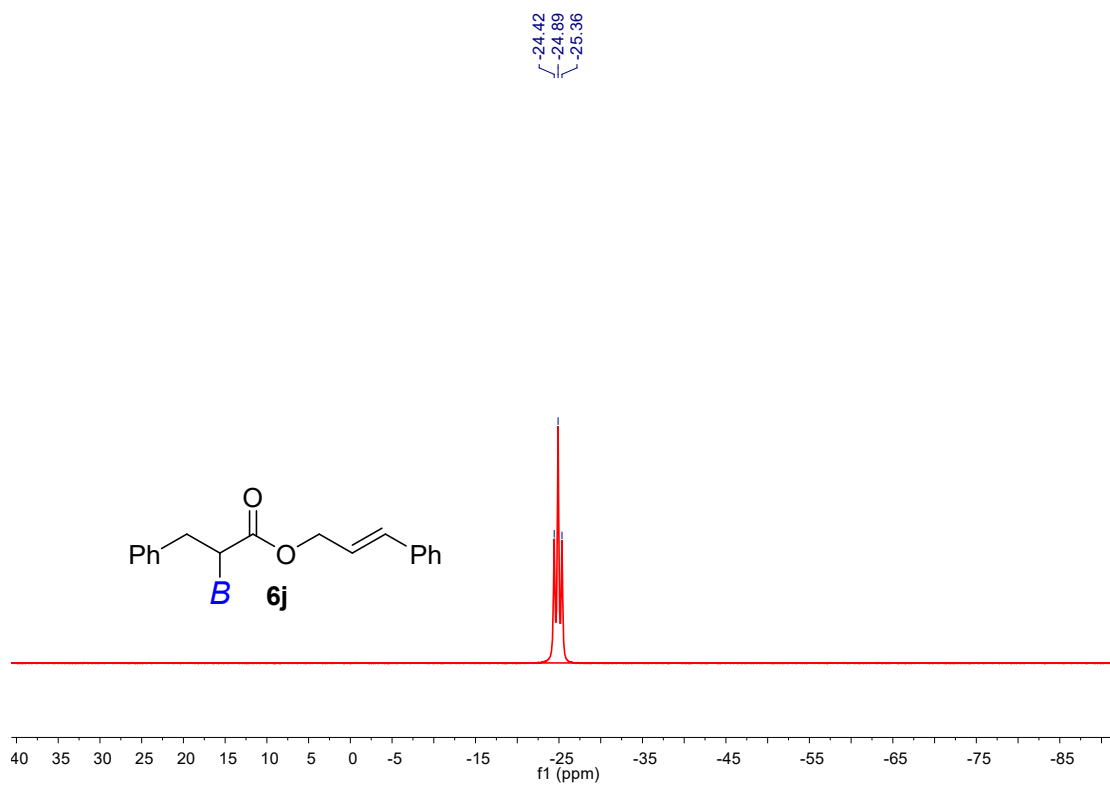

$^{11}\text{B}$  NMR (193 MHz,  $\text{CDCl}_3$ )

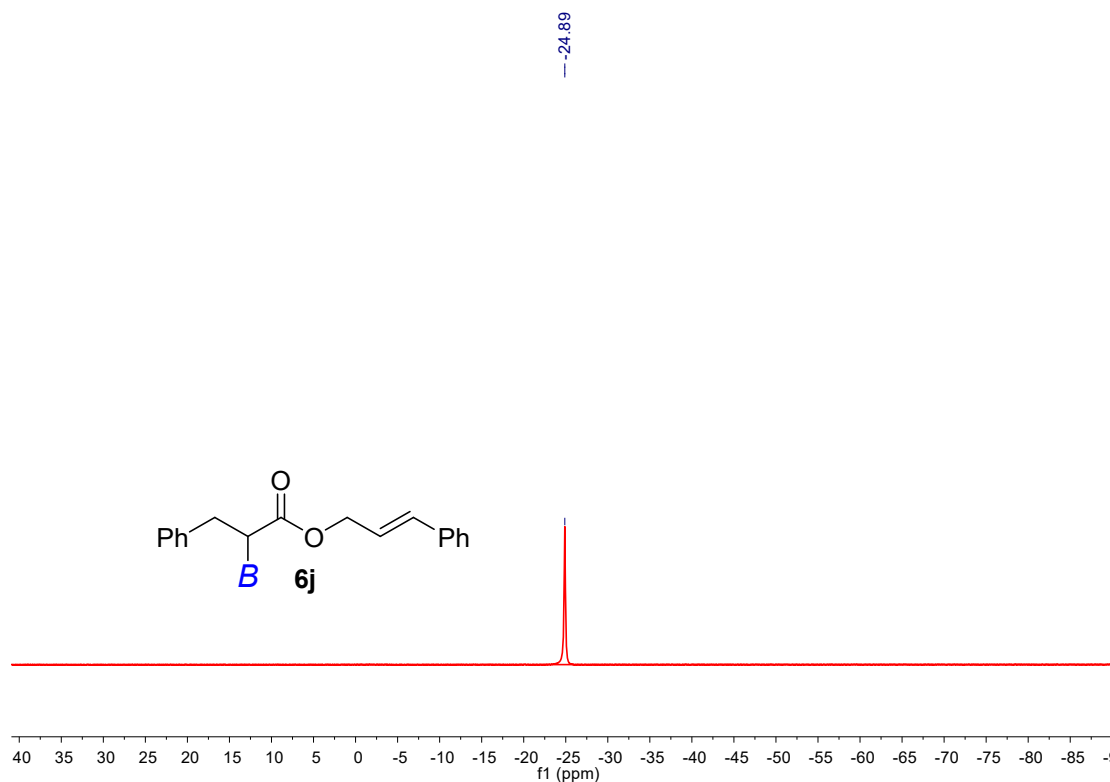

$^{11}\text{B}\{^1\text{H}\}$  NMR (193 MHz,  $\text{CDCl}_3$ )

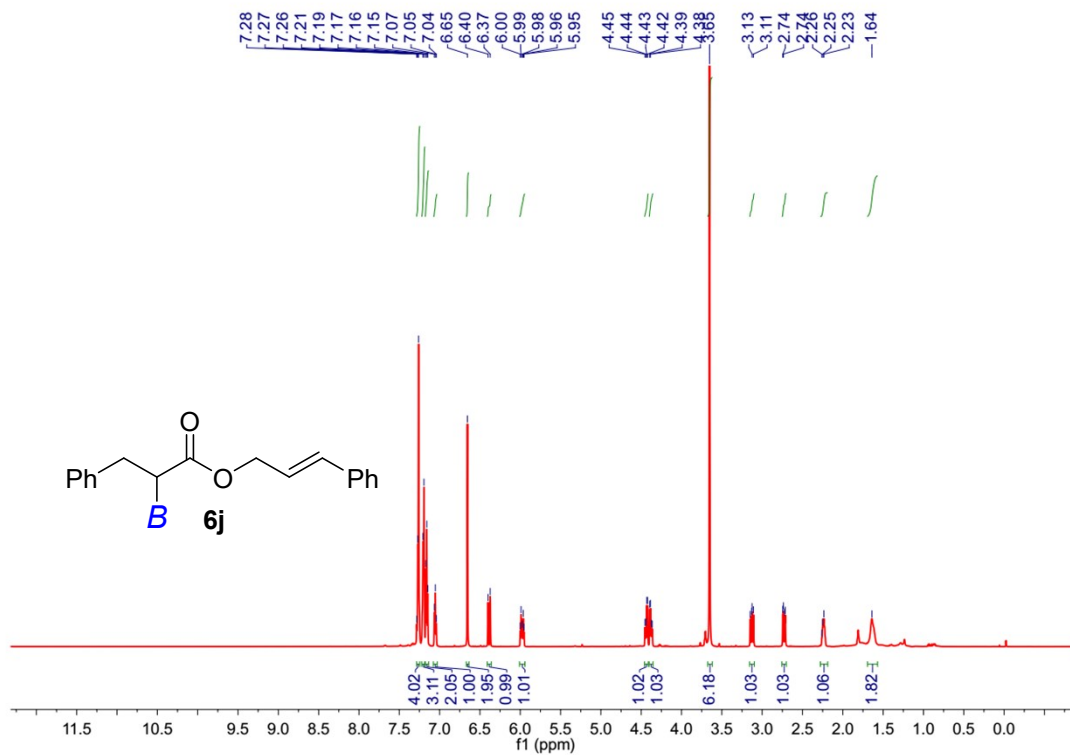

$^1\text{H}\{^{11}\text{B}\}$  NMR (600 MHz,  $\text{CDCl}_3$ )



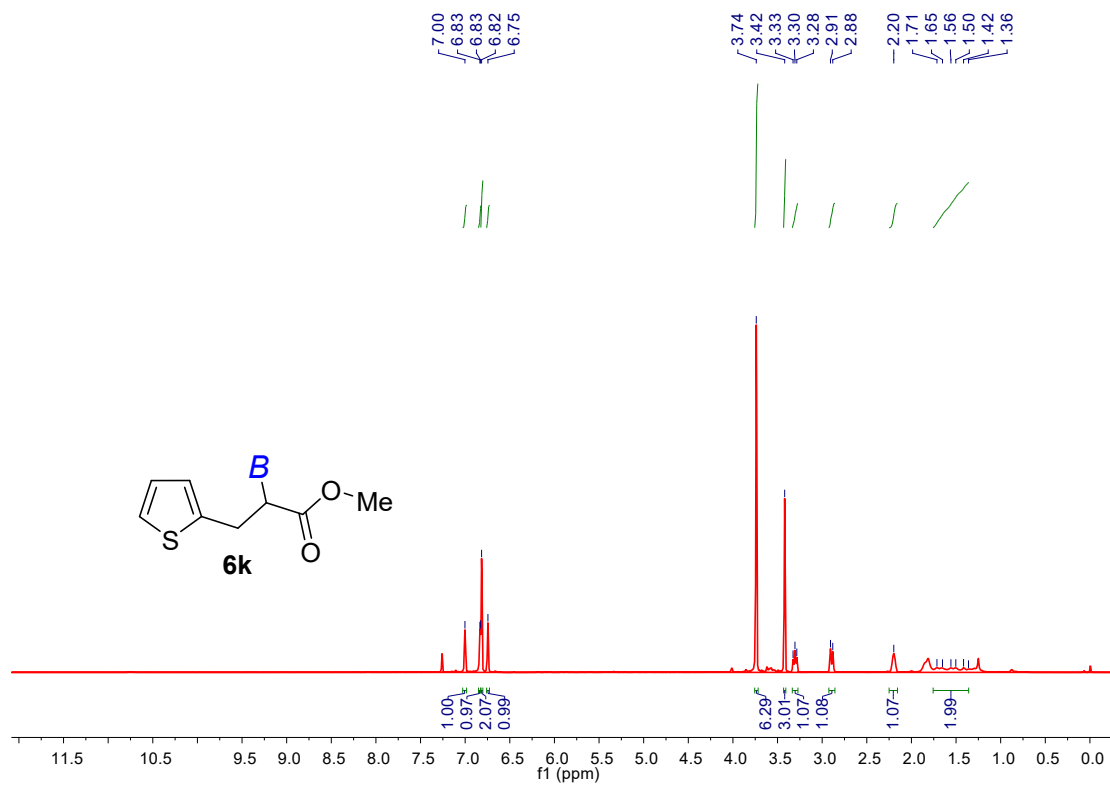

<sup>1</sup>H NMR (600 MHz, CDCl<sub>3</sub>)

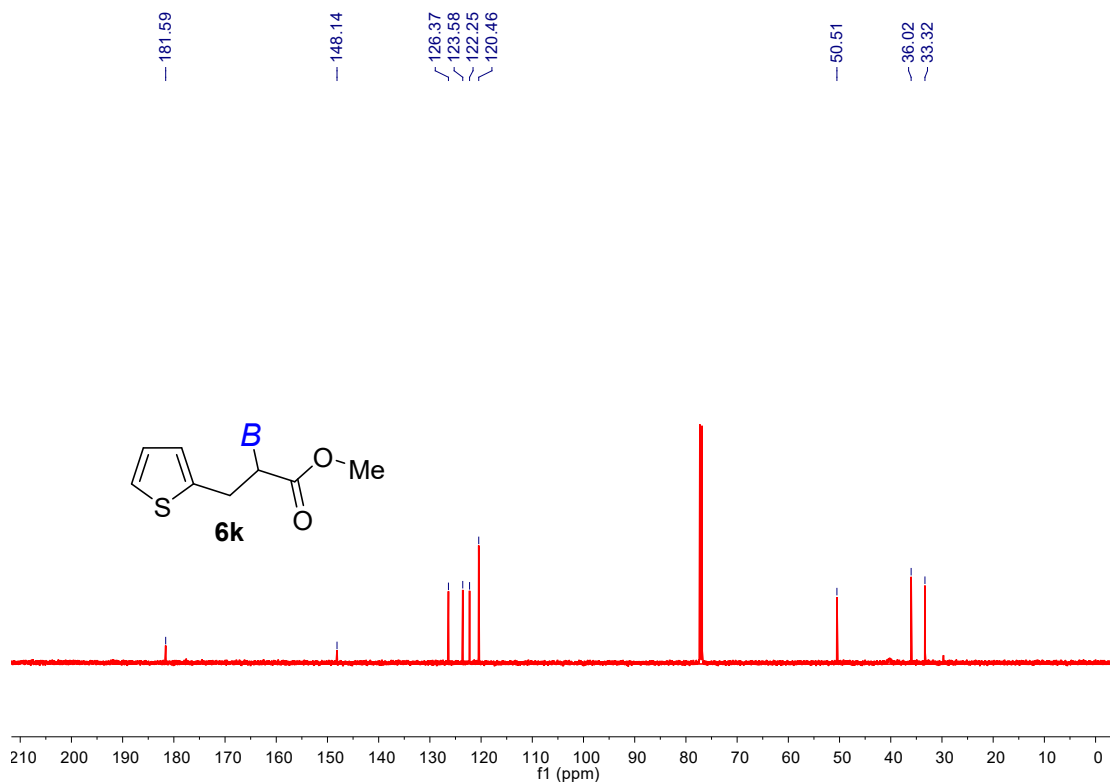

<sup>13</sup>C NMR (151 MHz, CDCl<sub>3</sub>)

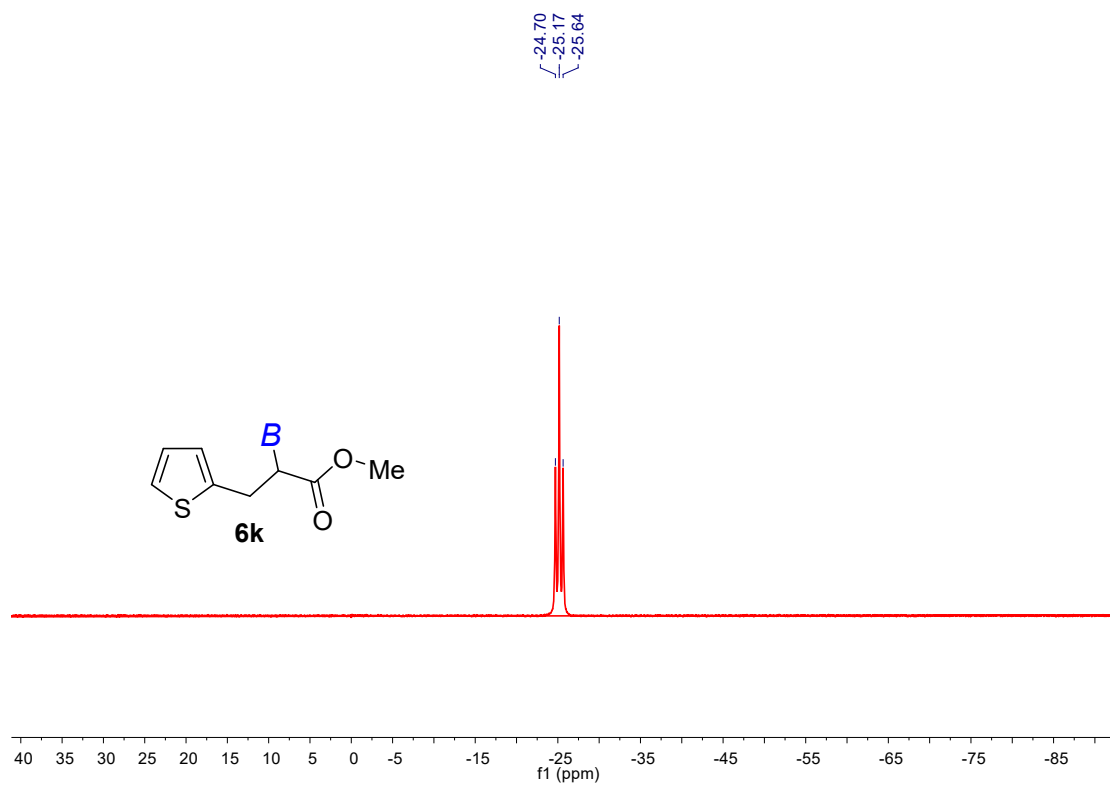

$^{11}\text{B}$  NMR (193 MHz,  $\text{CDCl}_3$ )

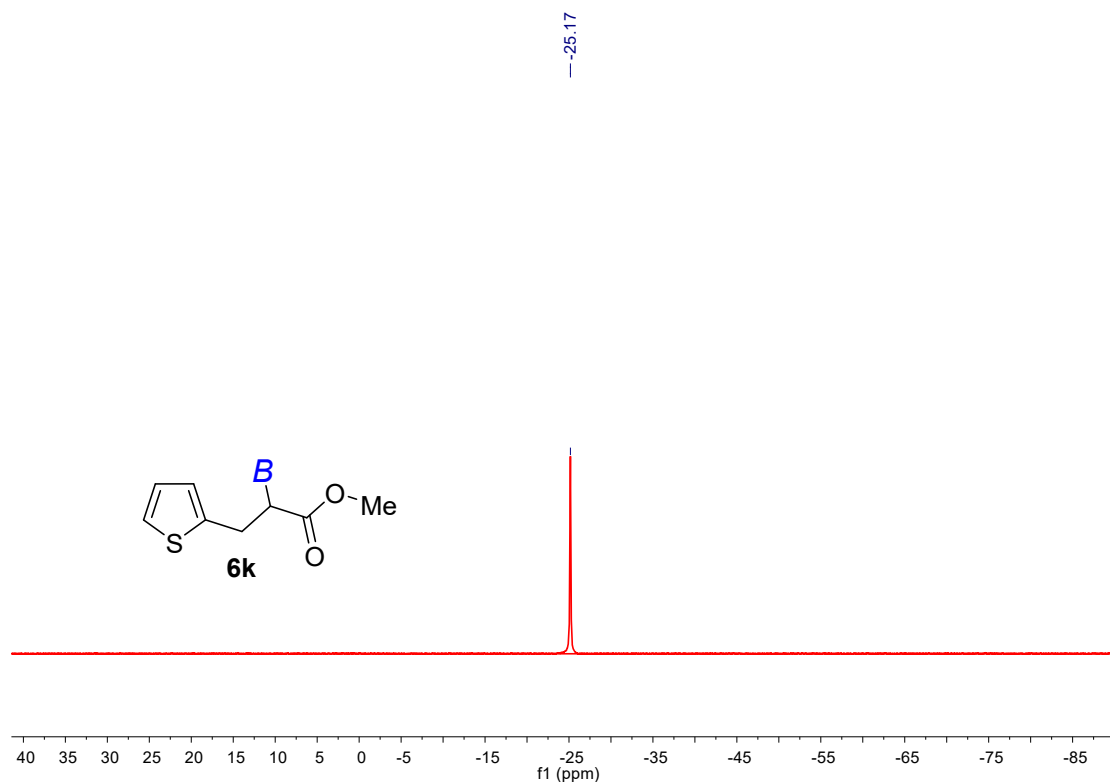

$^{11}\text{B}\{^1\text{H}\}$  NMR (193 MHz,  $\text{CDCl}_3$ )

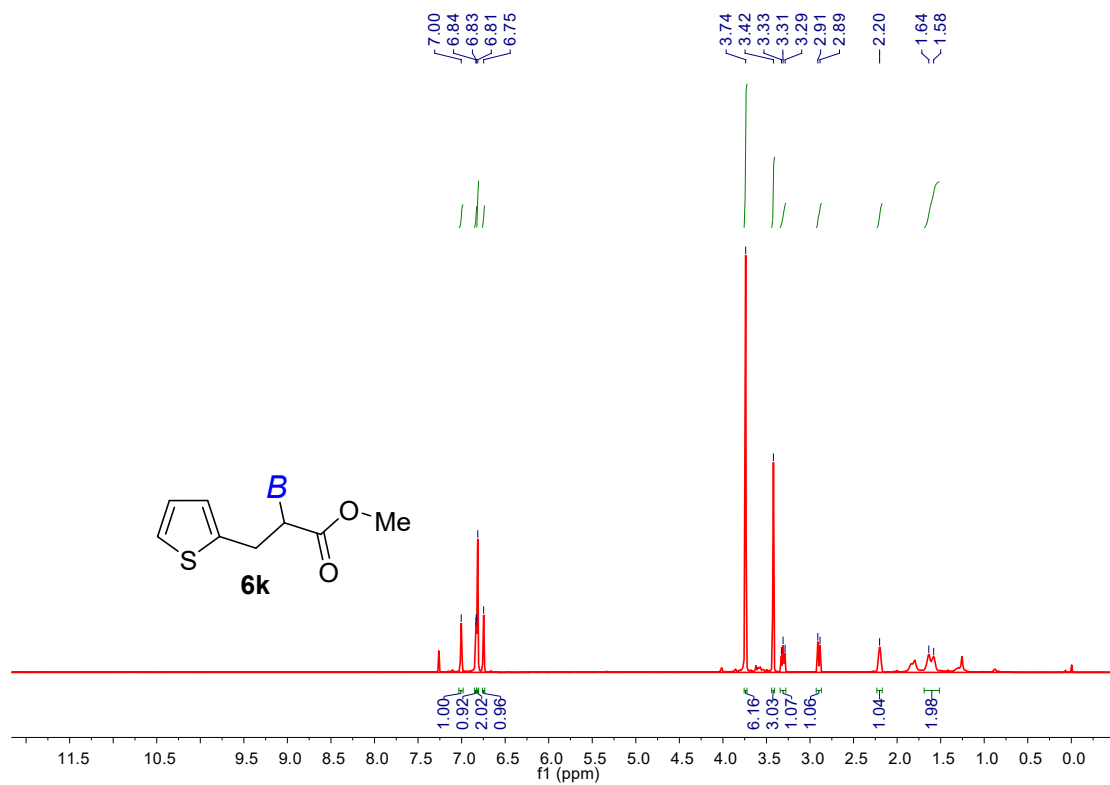

$^1\text{H}\{^{11}\text{B}\}$  NMR (600 MHz,  $\text{CDCl}_3$ )

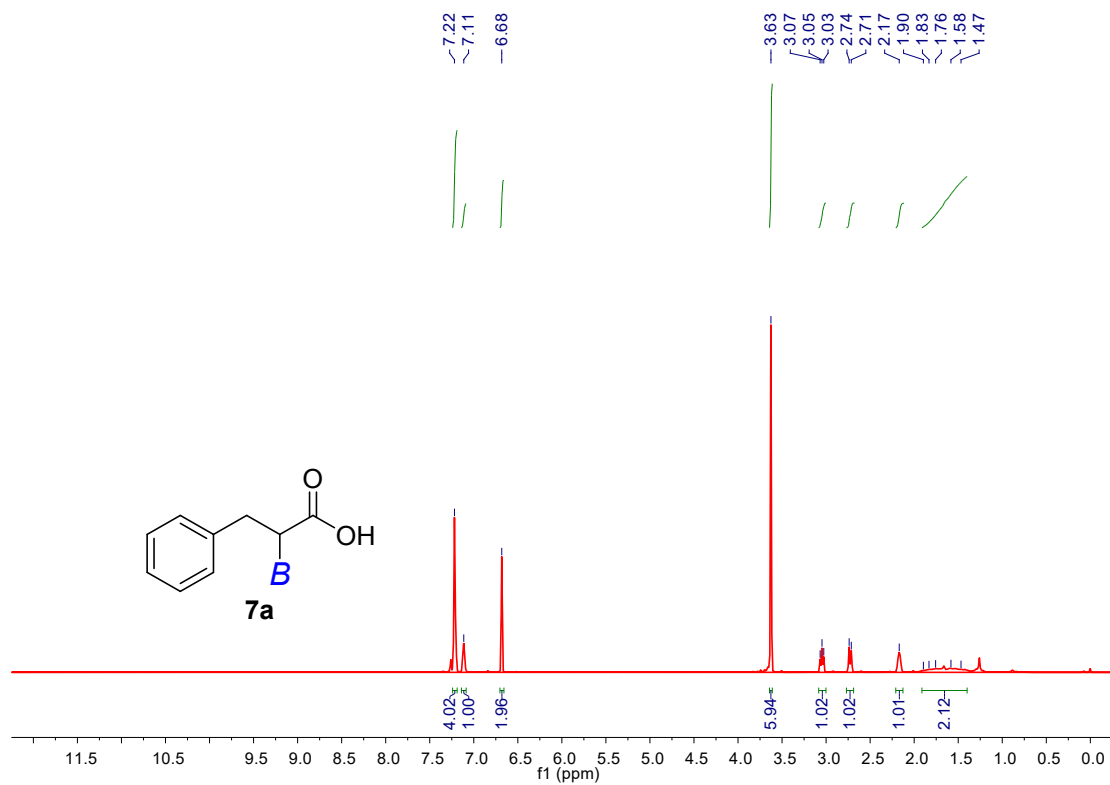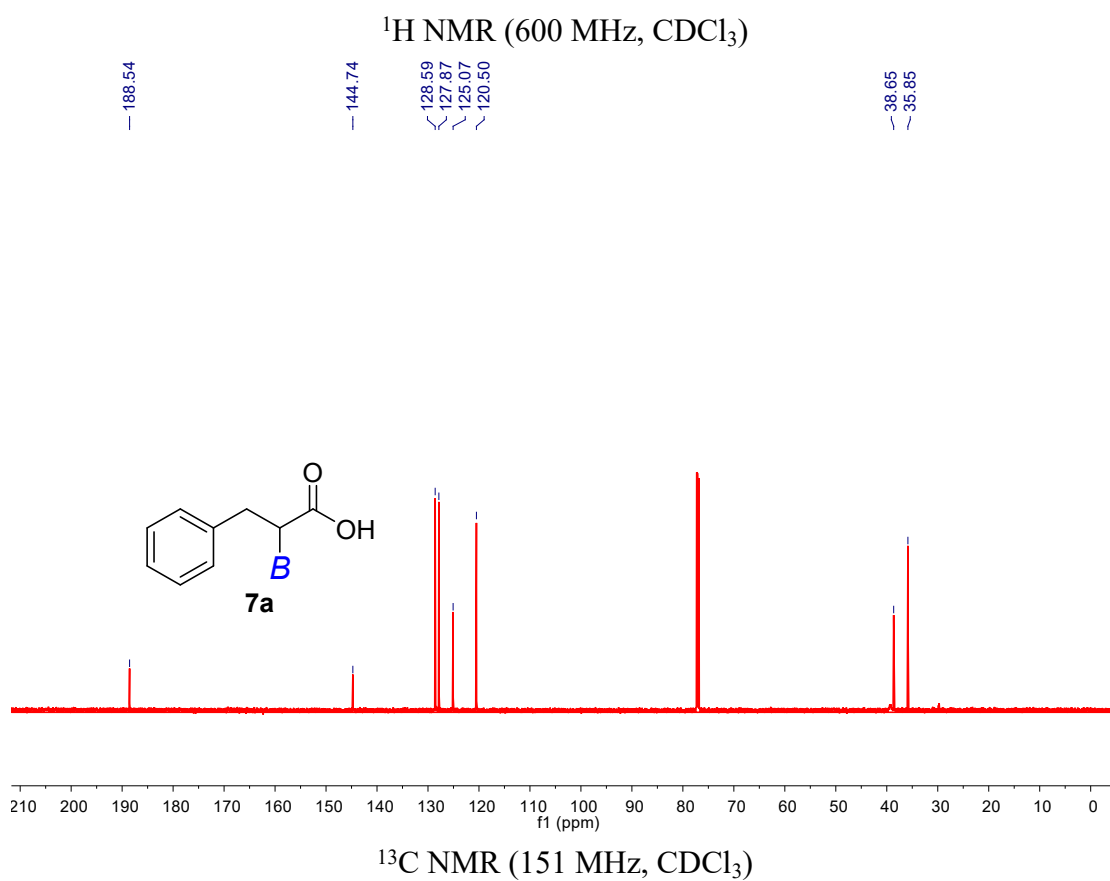

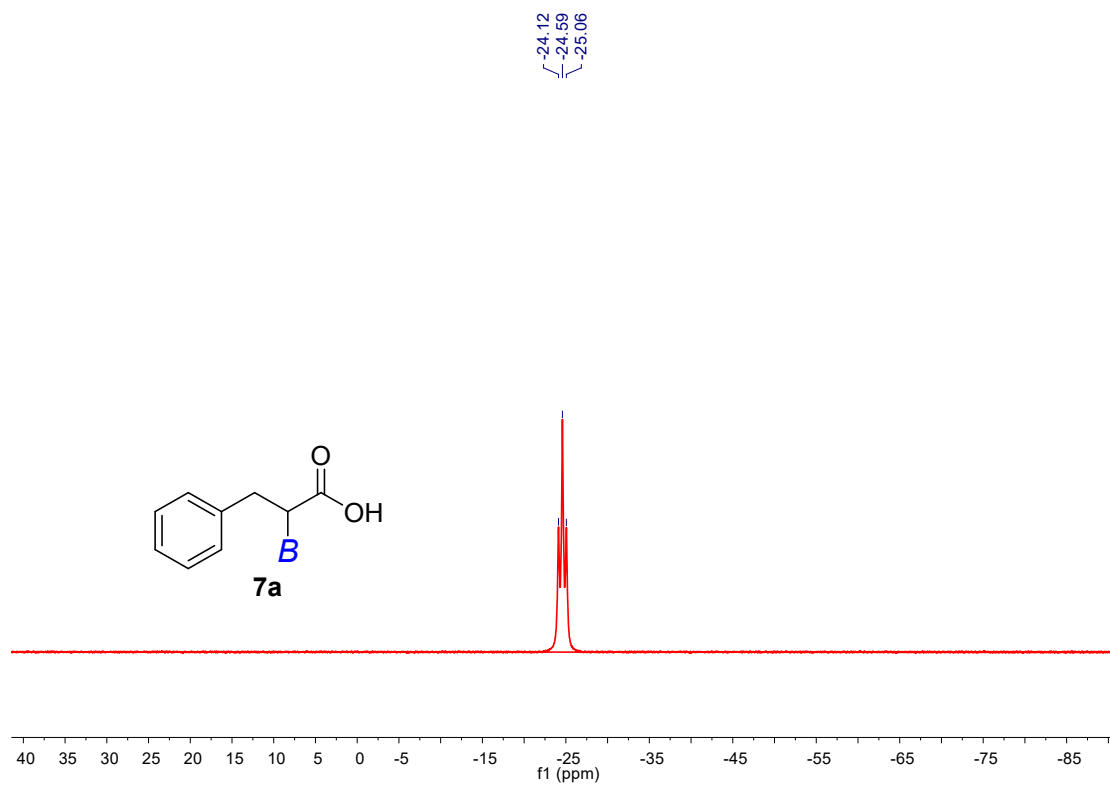

$^{11}\text{B}$  NMR (193 MHz,  $\text{CDCl}_3$ )

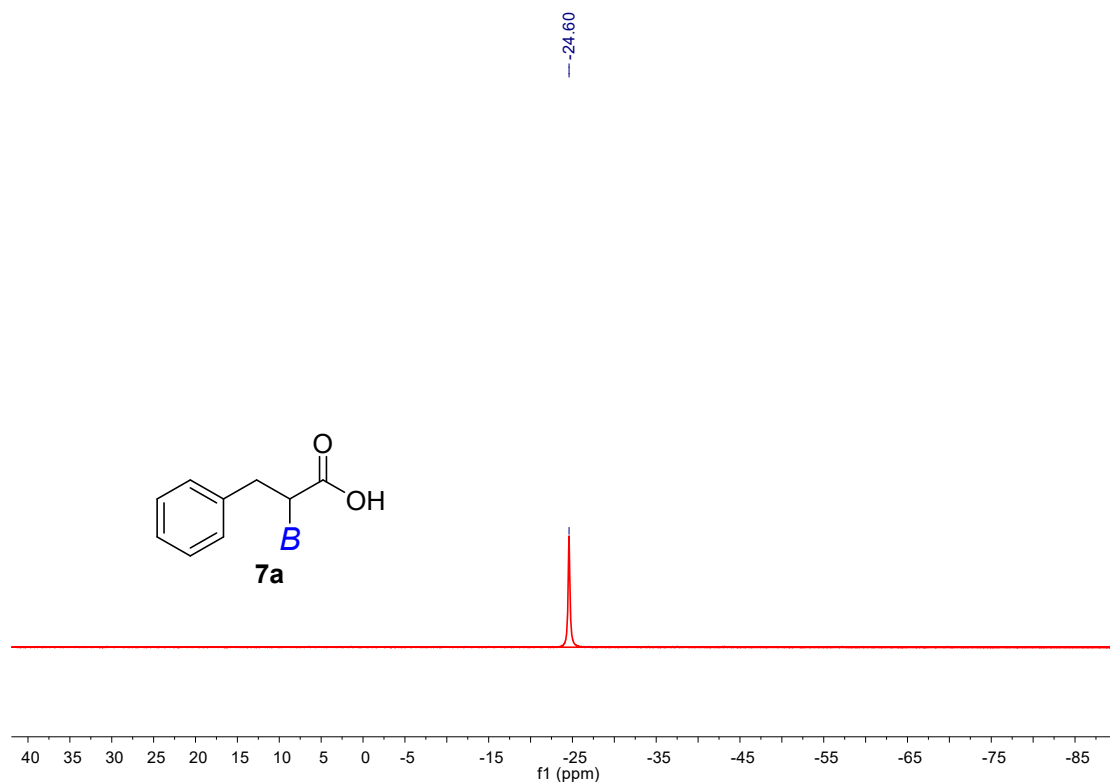

$^{11}\text{B}\{^1\text{H}\}$  NMR (193 MHz,  $\text{CDCl}_3$ )

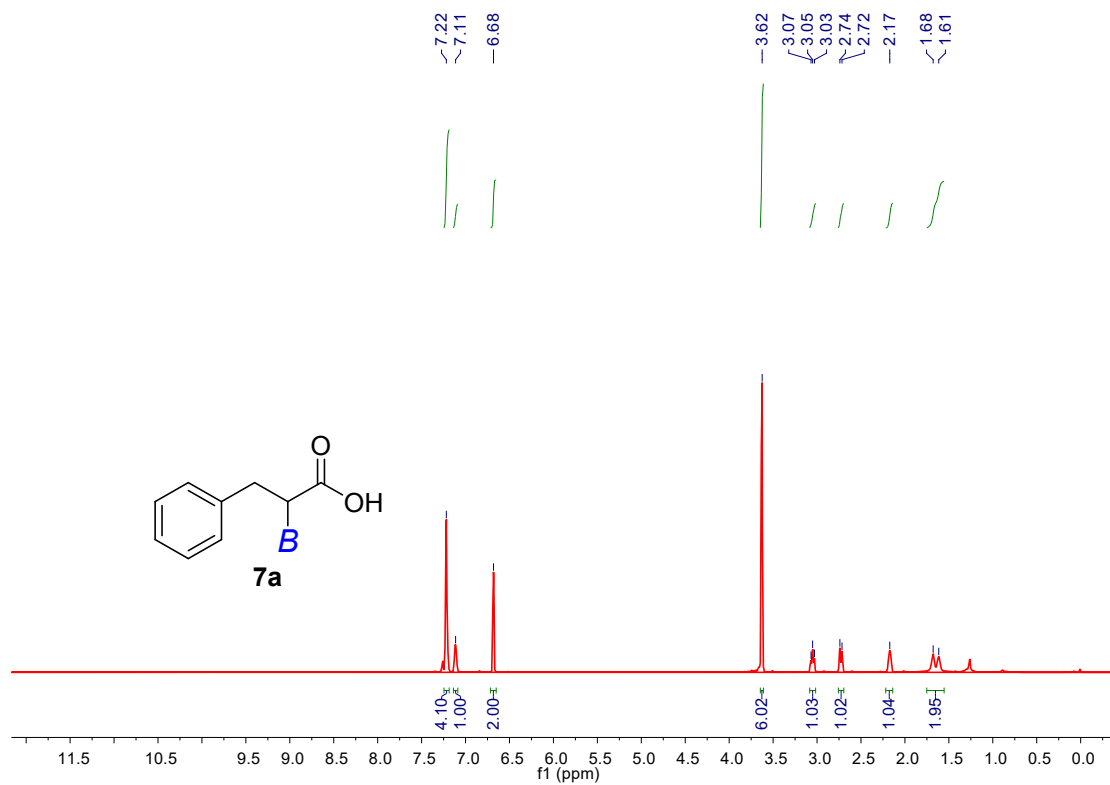

$^1\text{H}\{^{11}\text{B}\}$  NMR (600 MHz,  $\text{CDCl}_3$ )

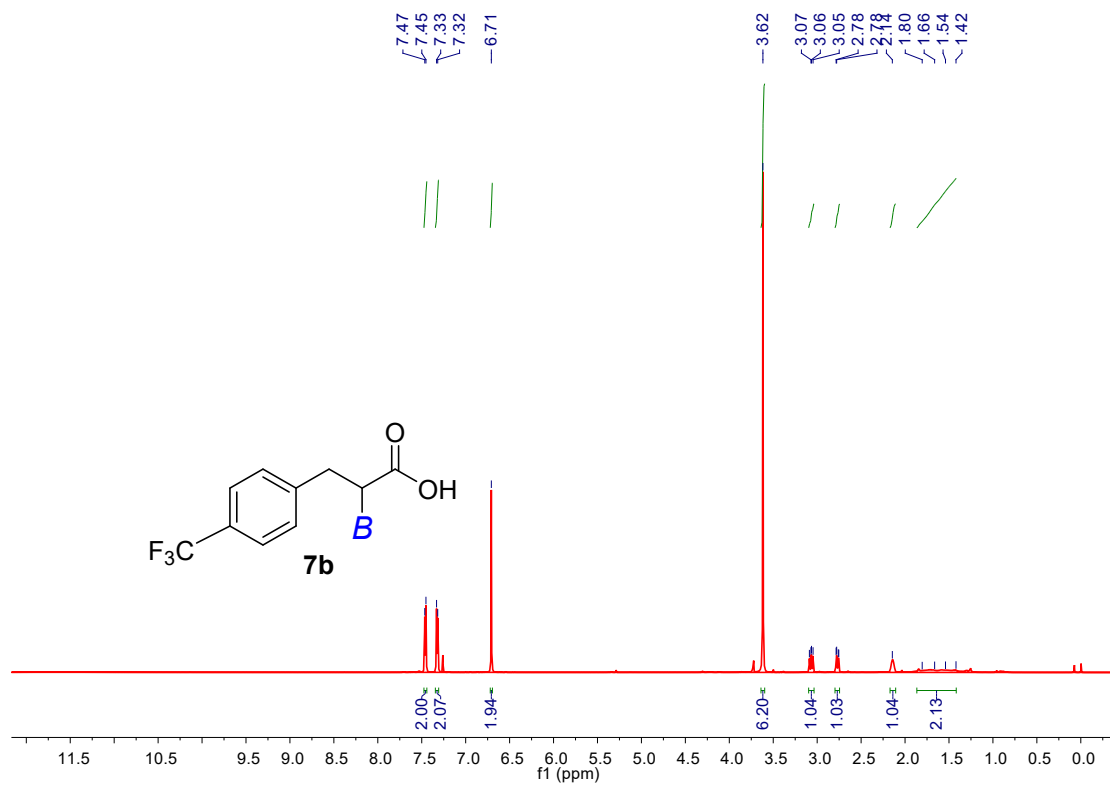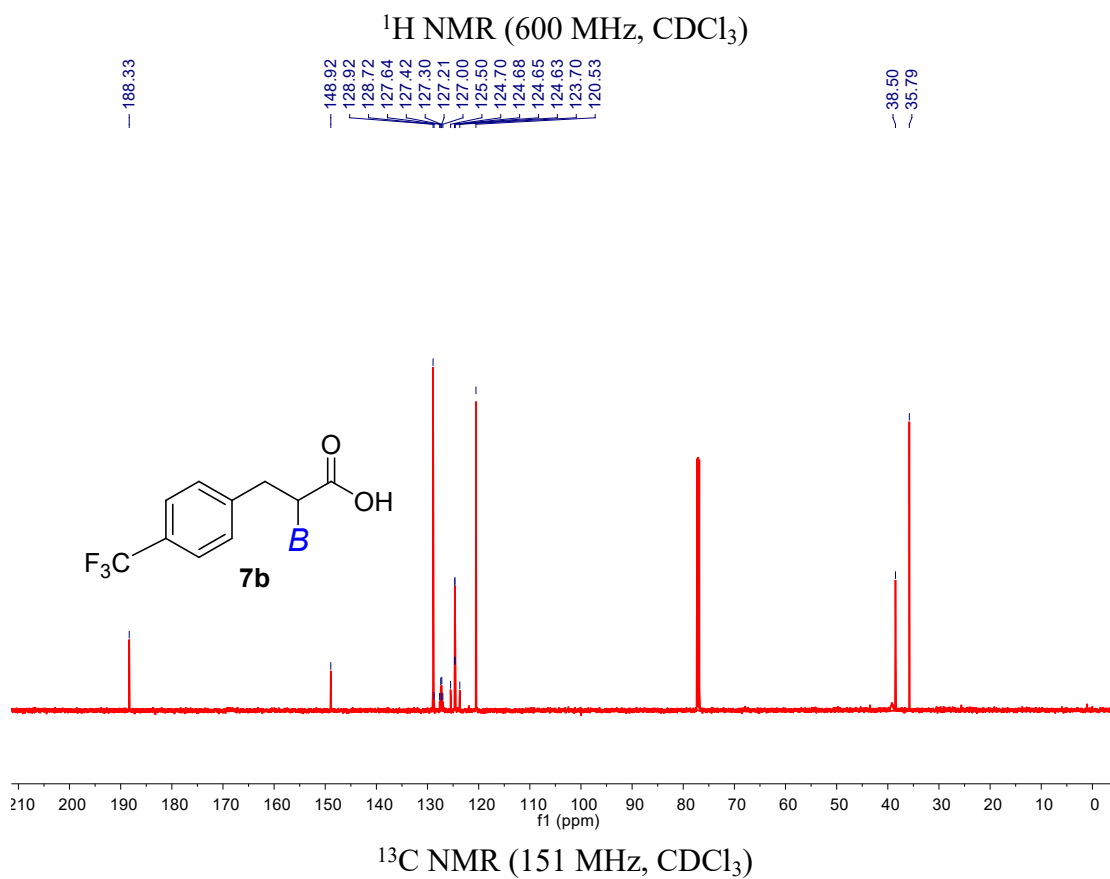

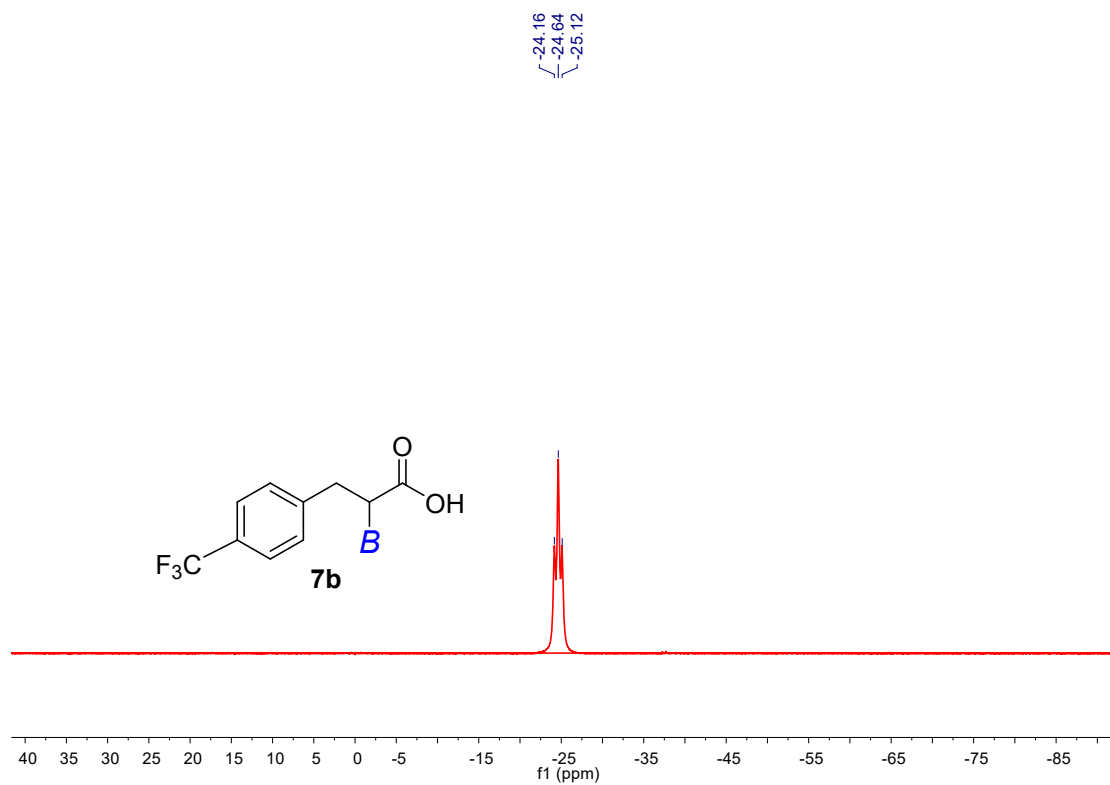

$^{11}\text{B}$  NMR (193 MHz,  $\text{CDCl}_3$ )

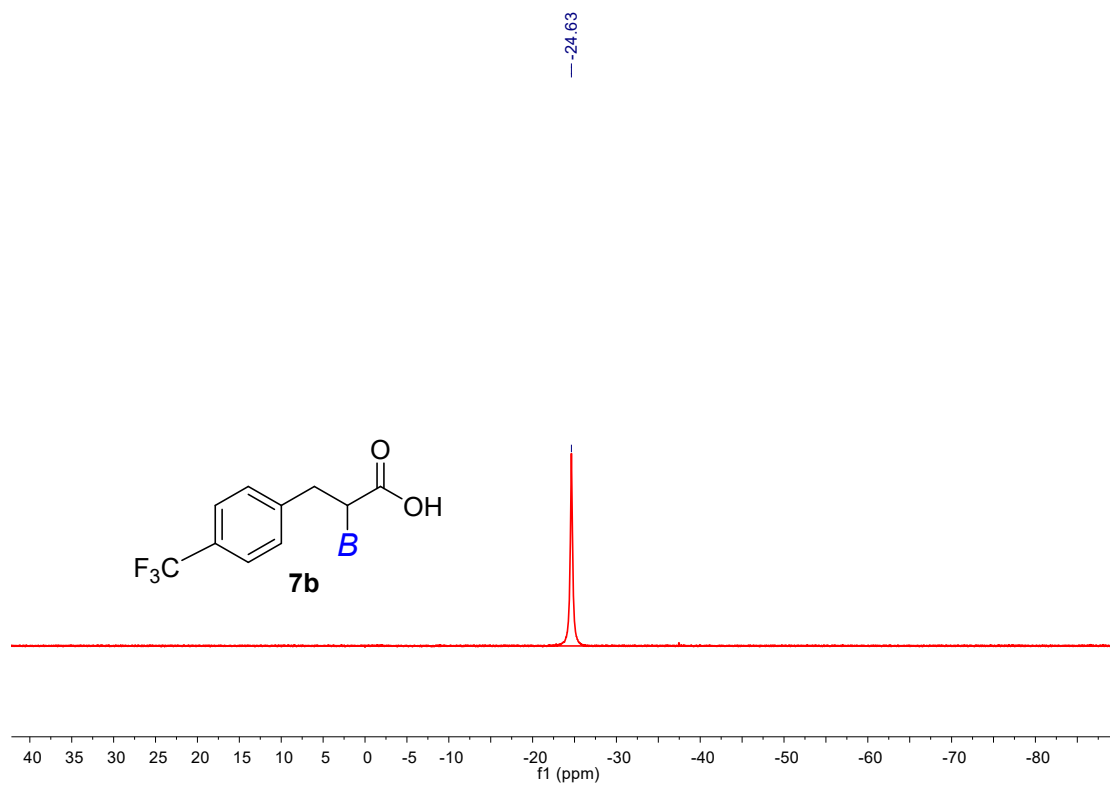

$^{11}\text{B}\{^1\text{H}\}$  NMR (193 MHz,  $\text{CDCl}_3$ )



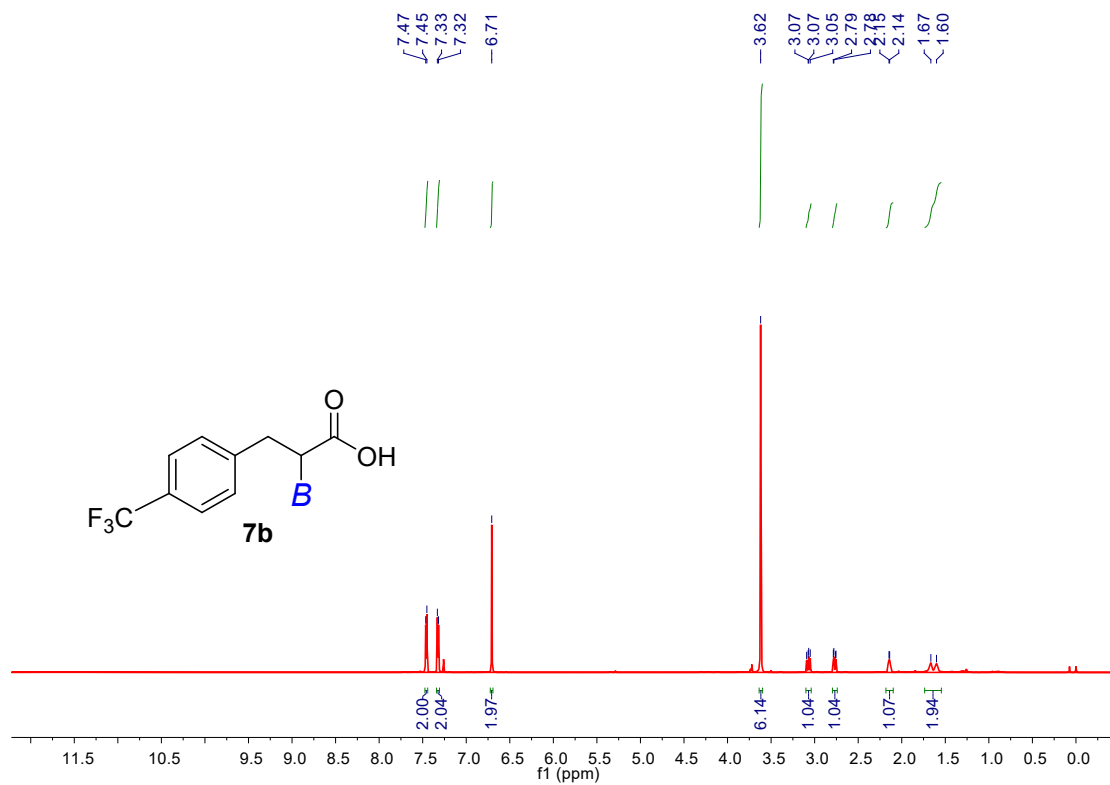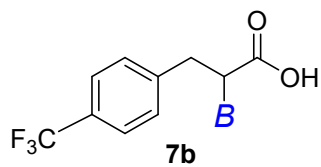

**<sup>1</sup>H{<sup>11</sup>B} NMR (600 MHz, CDCl<sub>3</sub>)**

-62.03

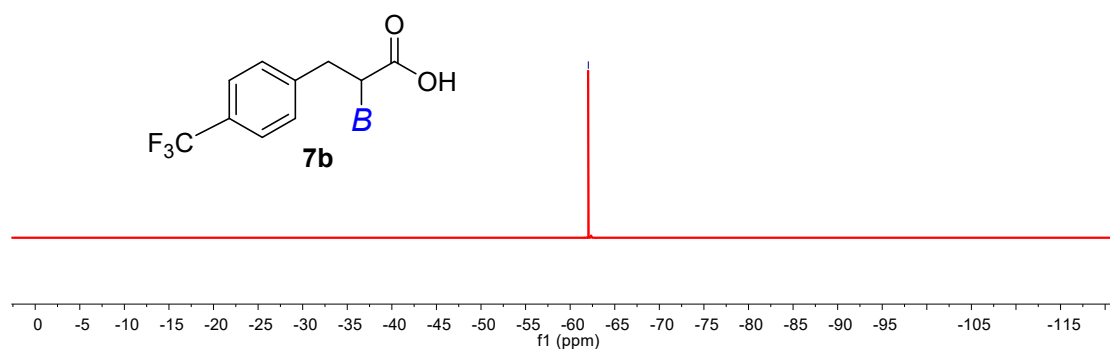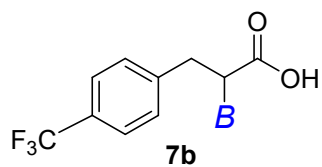

**<sup>19</sup>F NMR (565 MHz, CDCl<sub>3</sub>)**

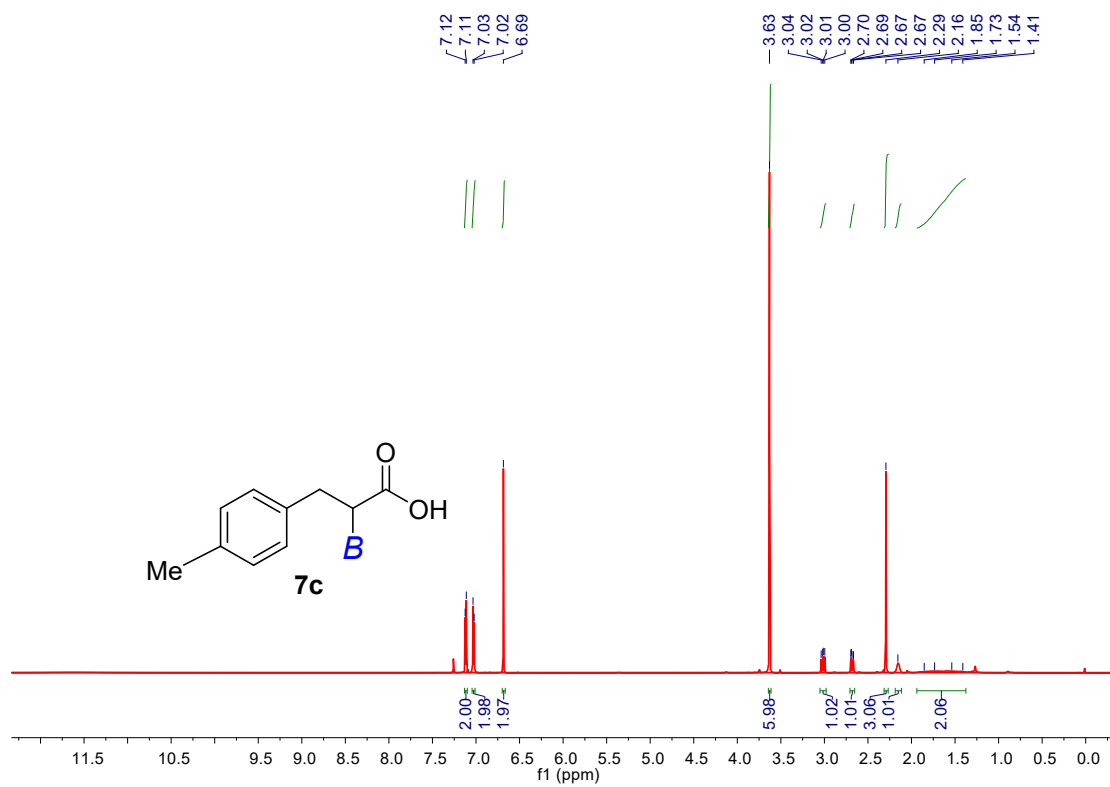

— 188.69  
 ~ 141.66  
 ~ 134.28  
 ~ 128.56  
 ~ 128.44  
 — 120.49  
 ~ 38.20  
 ~ 35.85  
 — 21.01

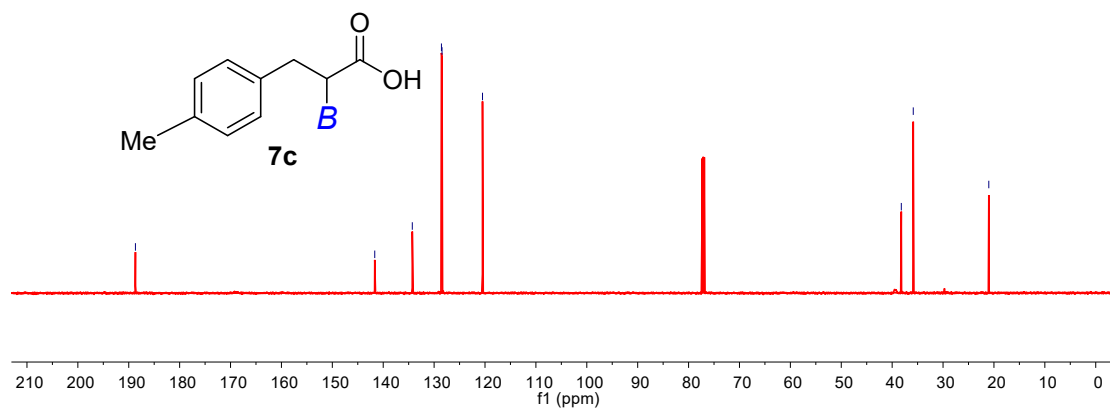

<sup>13</sup>C NMR (151 MHz, CDCl<sub>3</sub>)

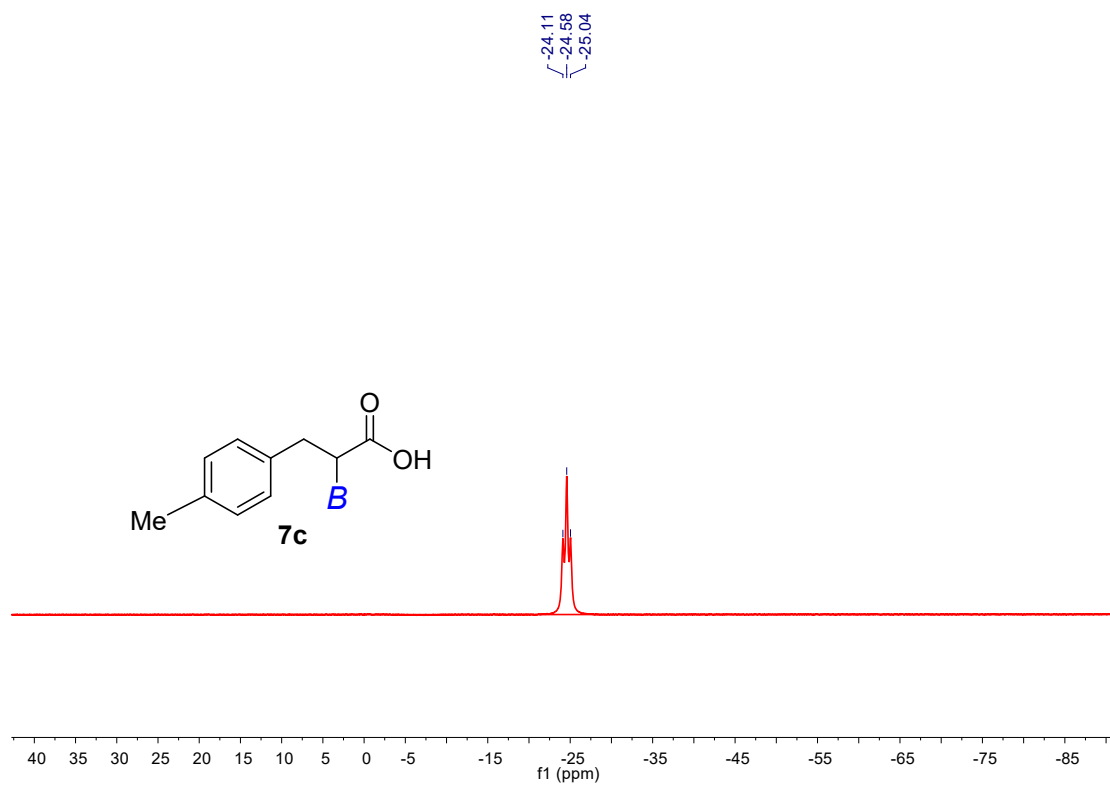

<sup>11</sup>B NMR (193 MHz, CDCl<sub>3</sub>)

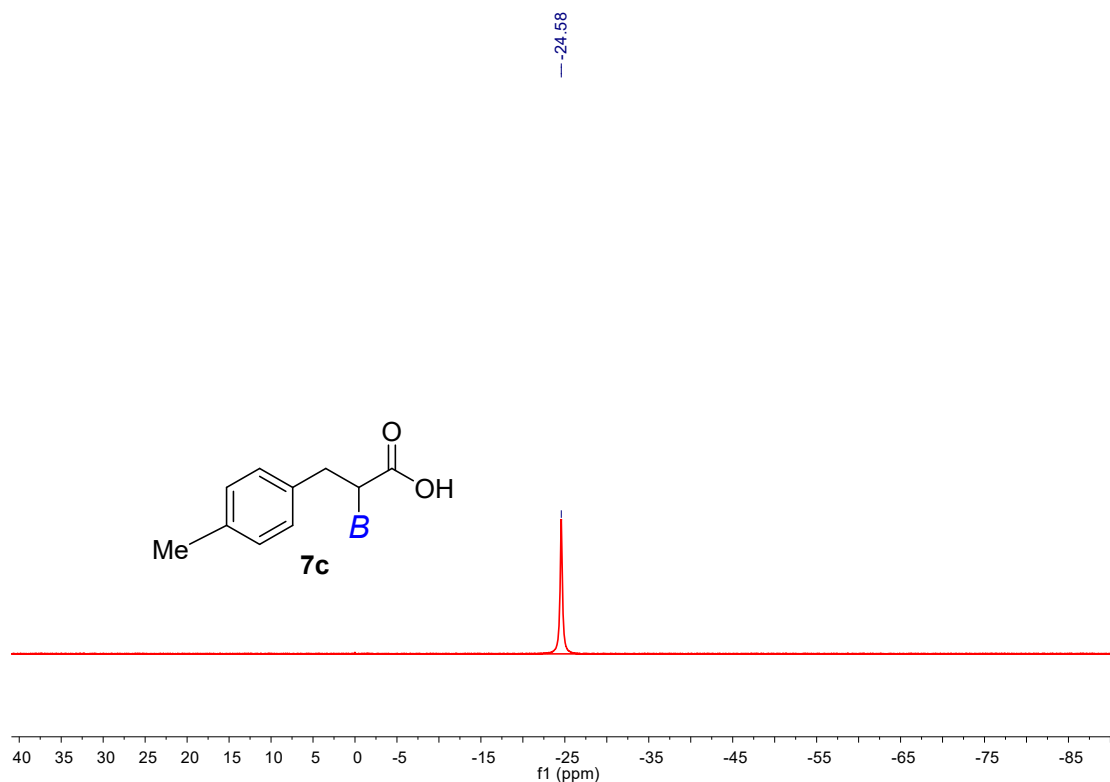

<sup>11</sup>B{<sup>1</sup>H} NMR (193 MHz, CDCl<sub>3</sub>)

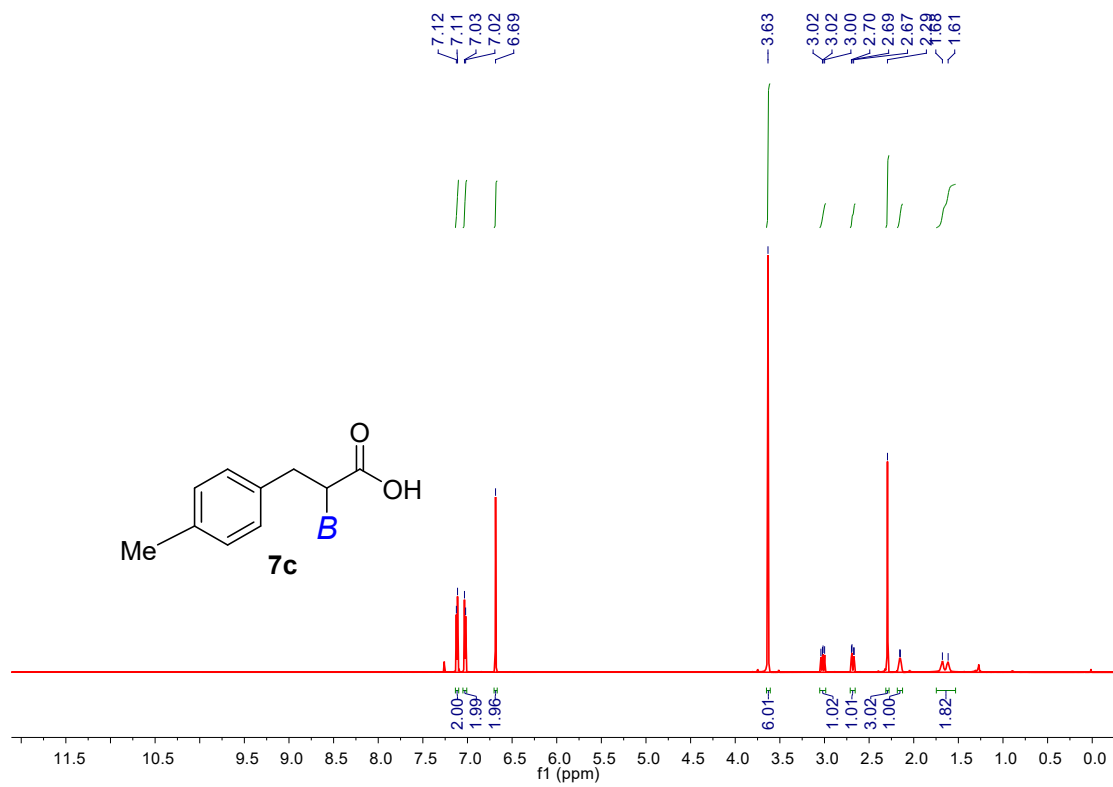

$^1\text{H}\{^{11}\text{B}\}$  NMR (600 MHz,  $\text{CDCl}_3$ )

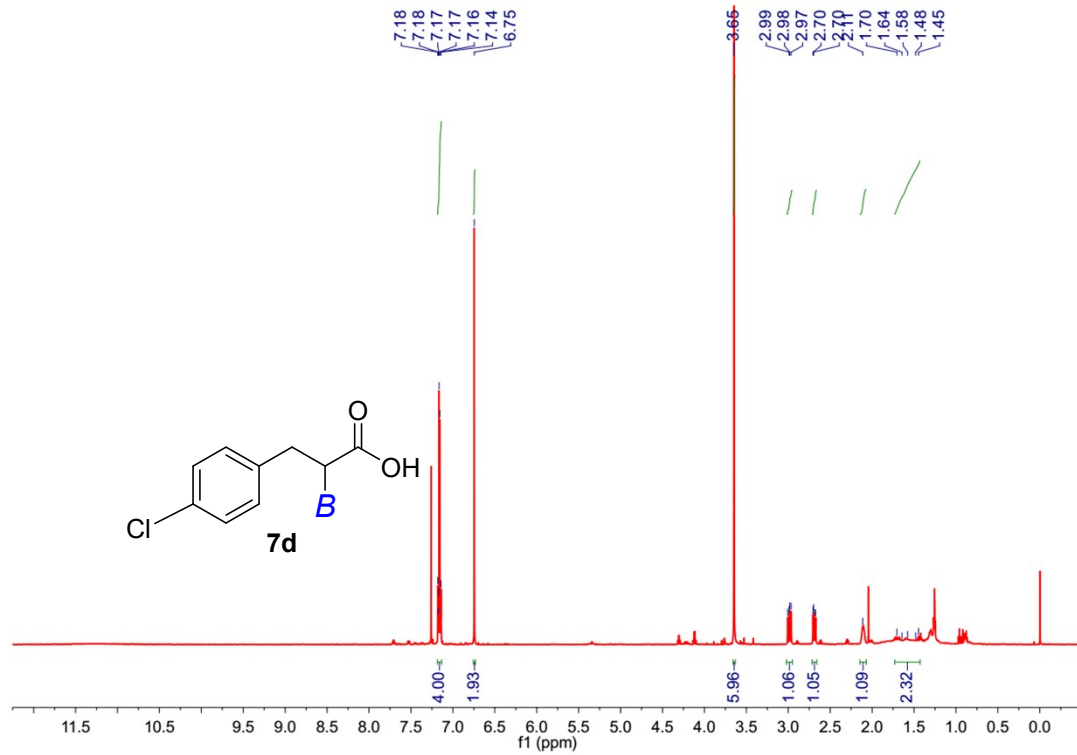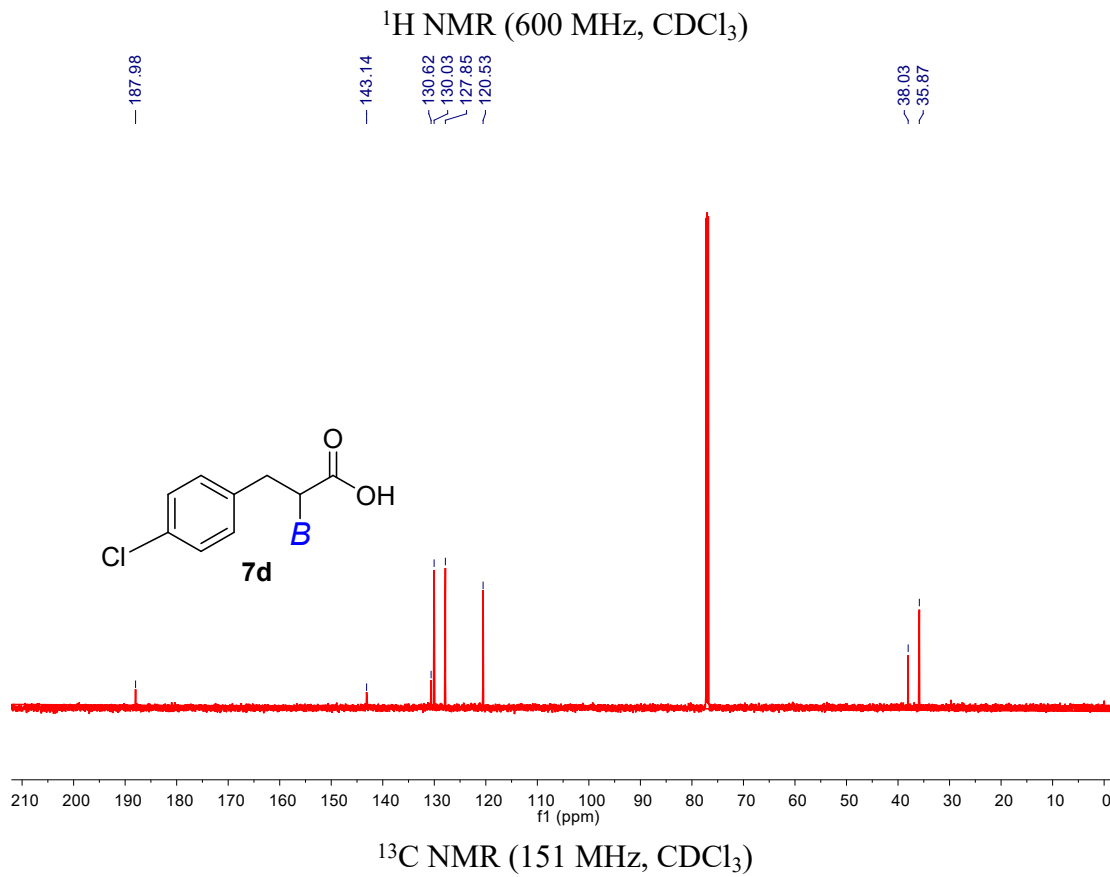

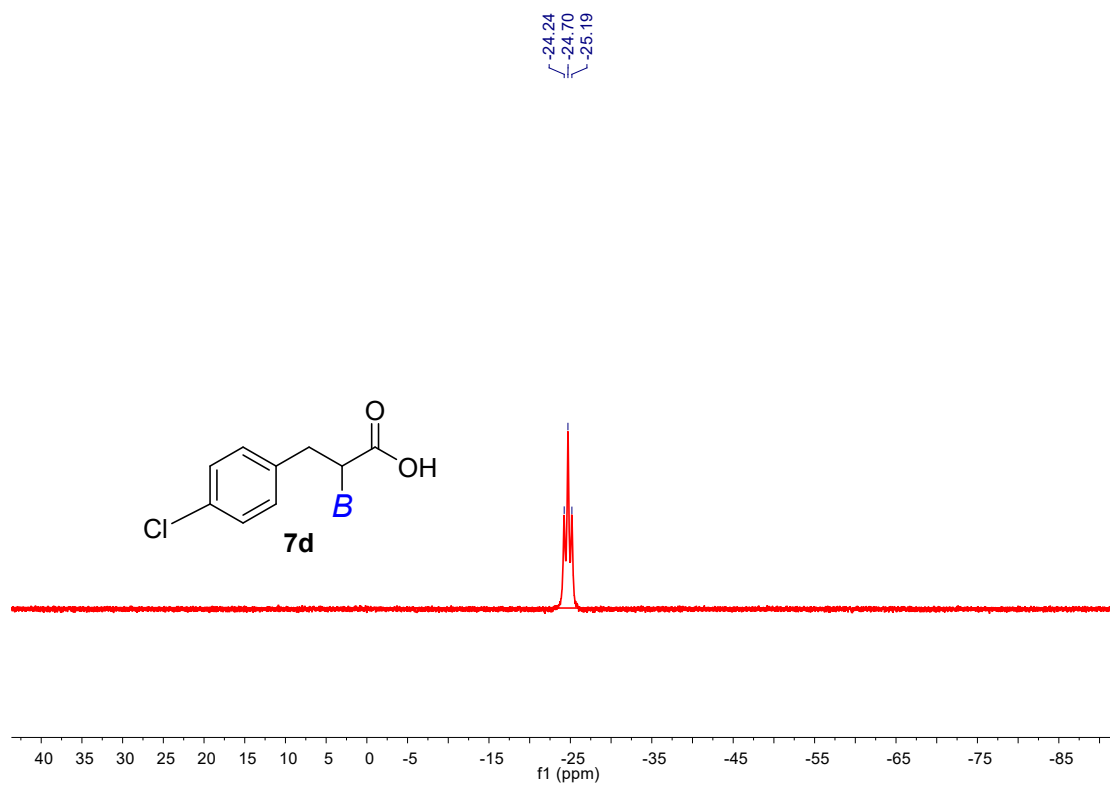

$^{11}\text{B}$  NMR (193 MHz,  $\text{CDCl}_3$ )

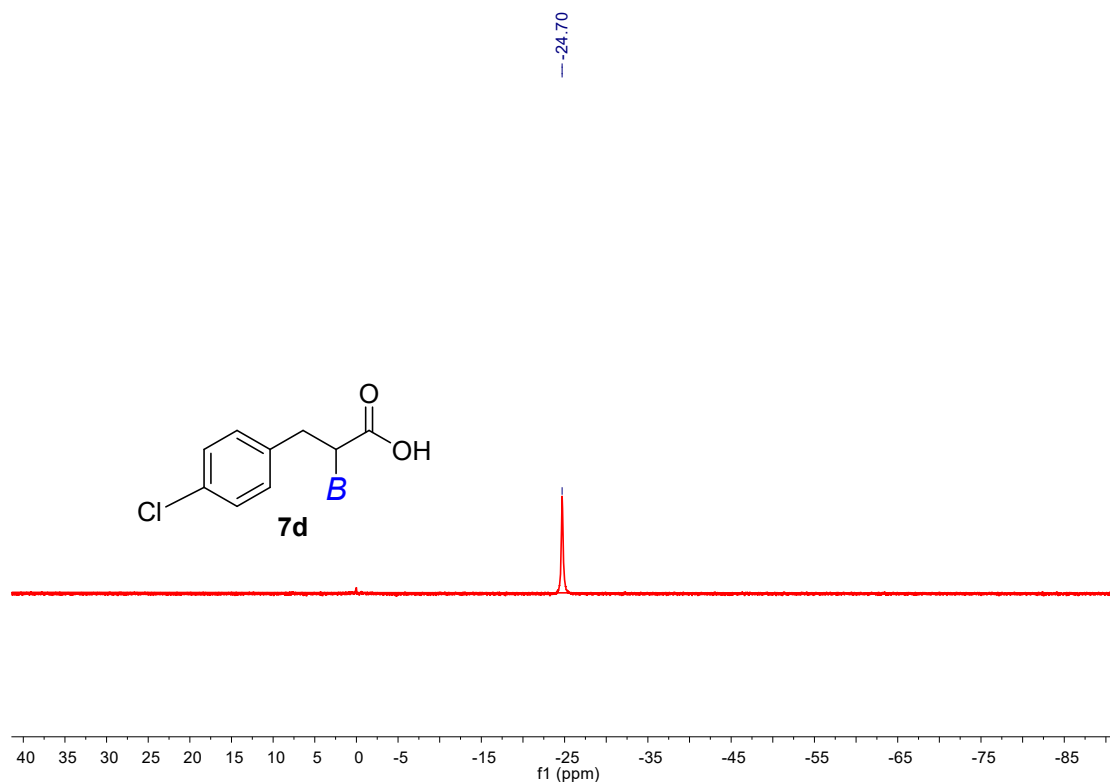

$^{11}\text{B}\{^1\text{H}\}$  NMR (193 MHz,  $\text{CDCl}_3$ )

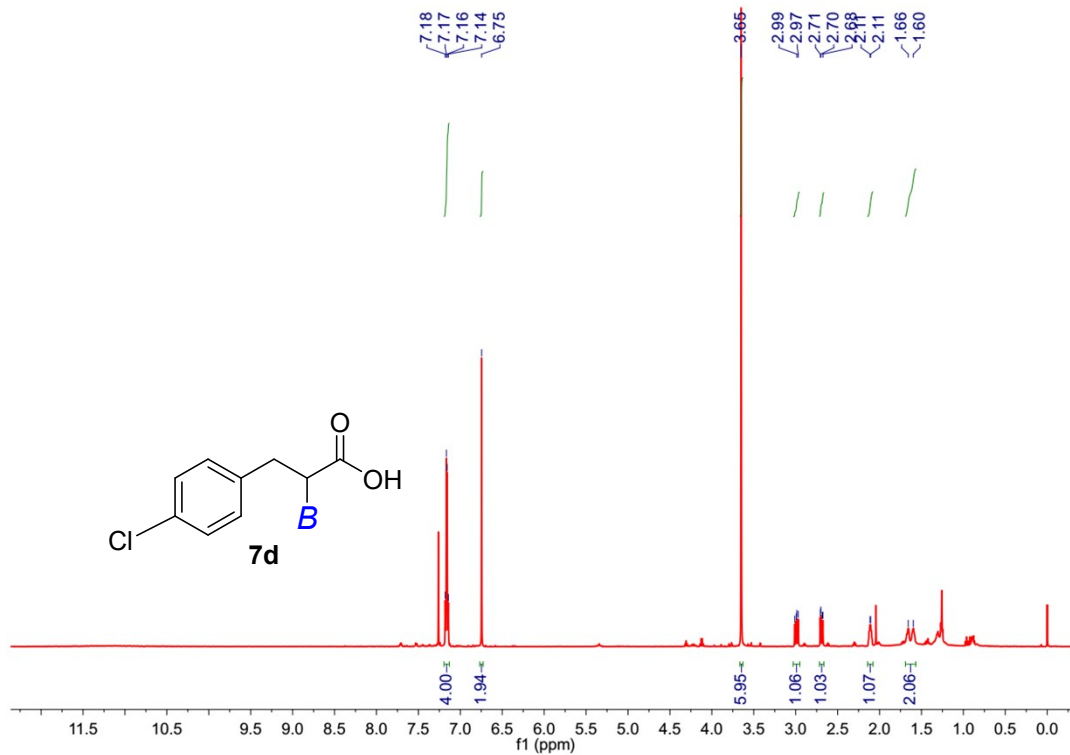

$^1\text{H}\{^{11}\text{B}\}$  NMR (600 MHz,  $\text{CDCl}_3$ )

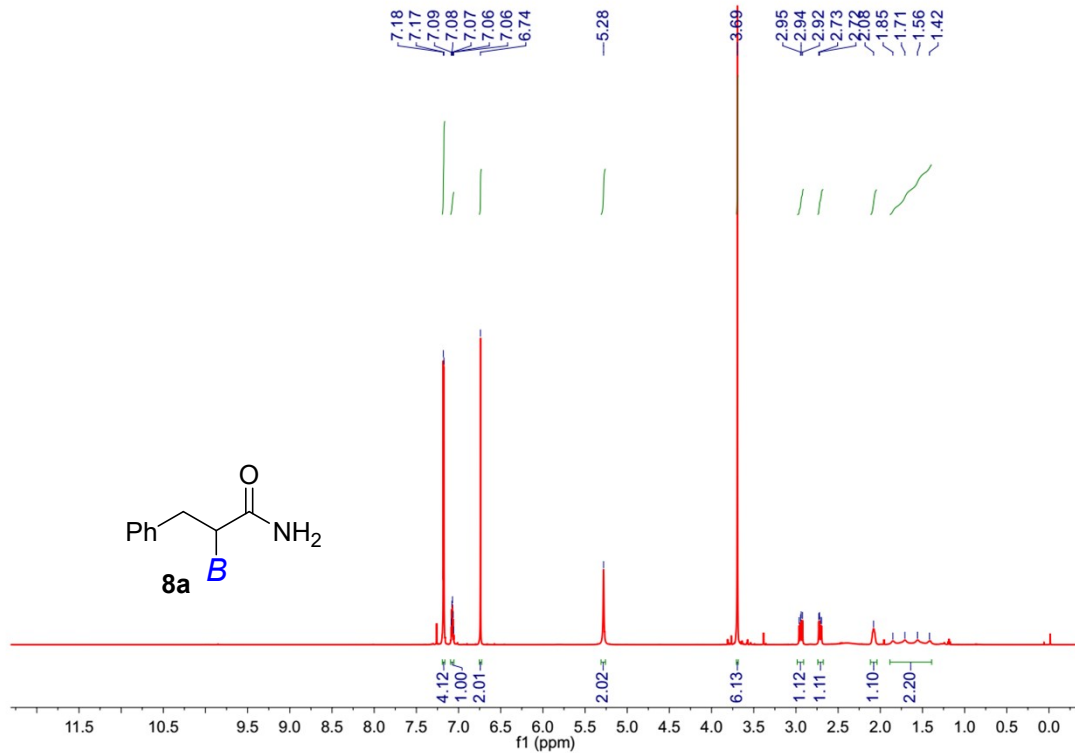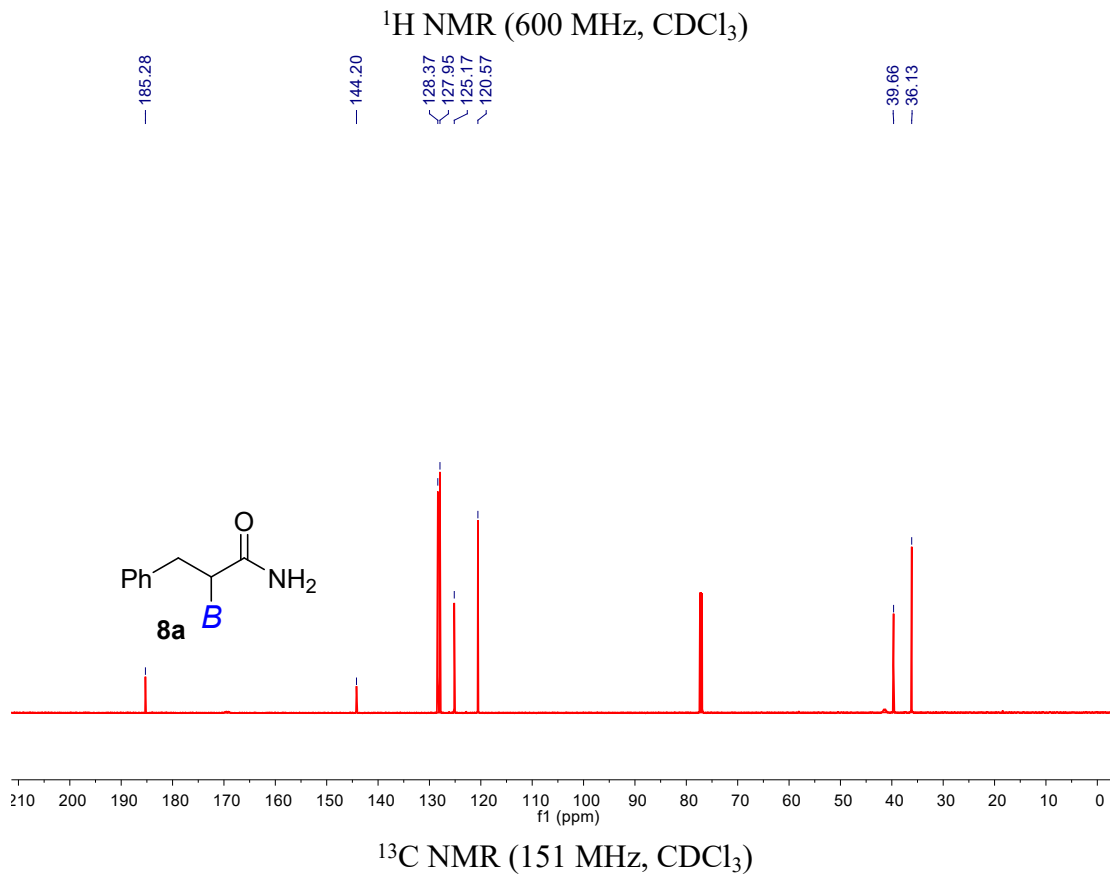



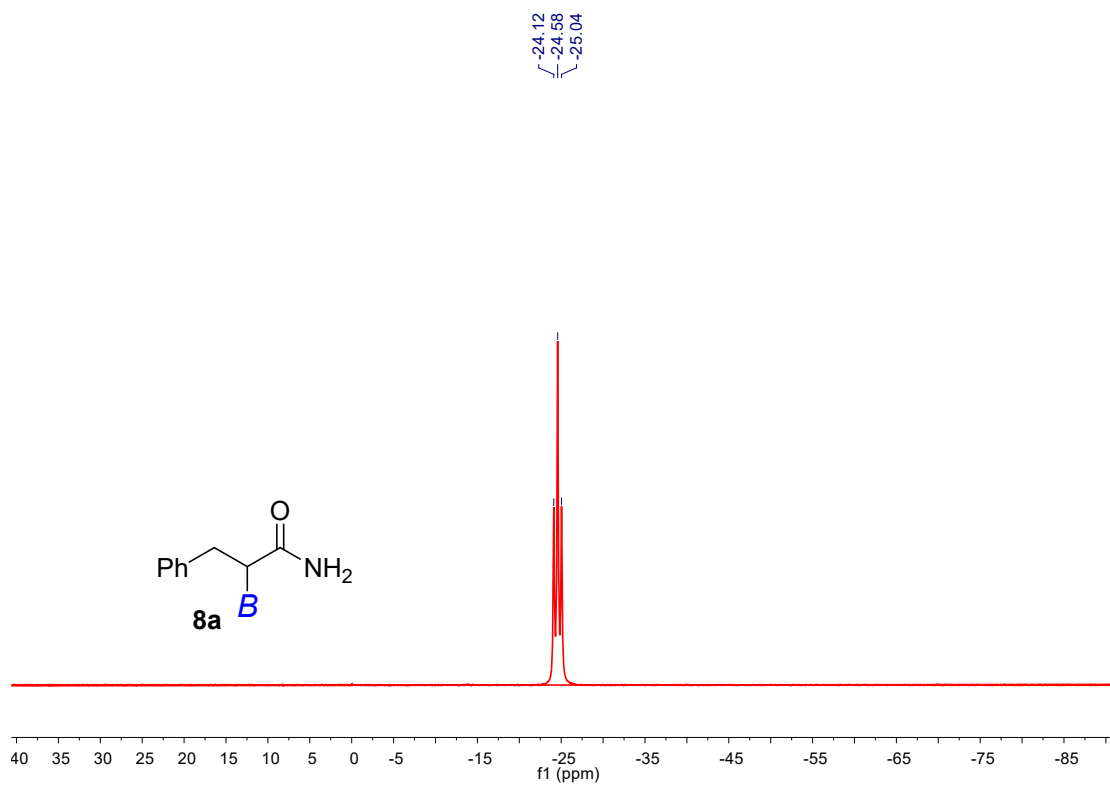

$^{11}\text{B}$  NMR (193 MHz,  $\text{CDCl}_3$ )

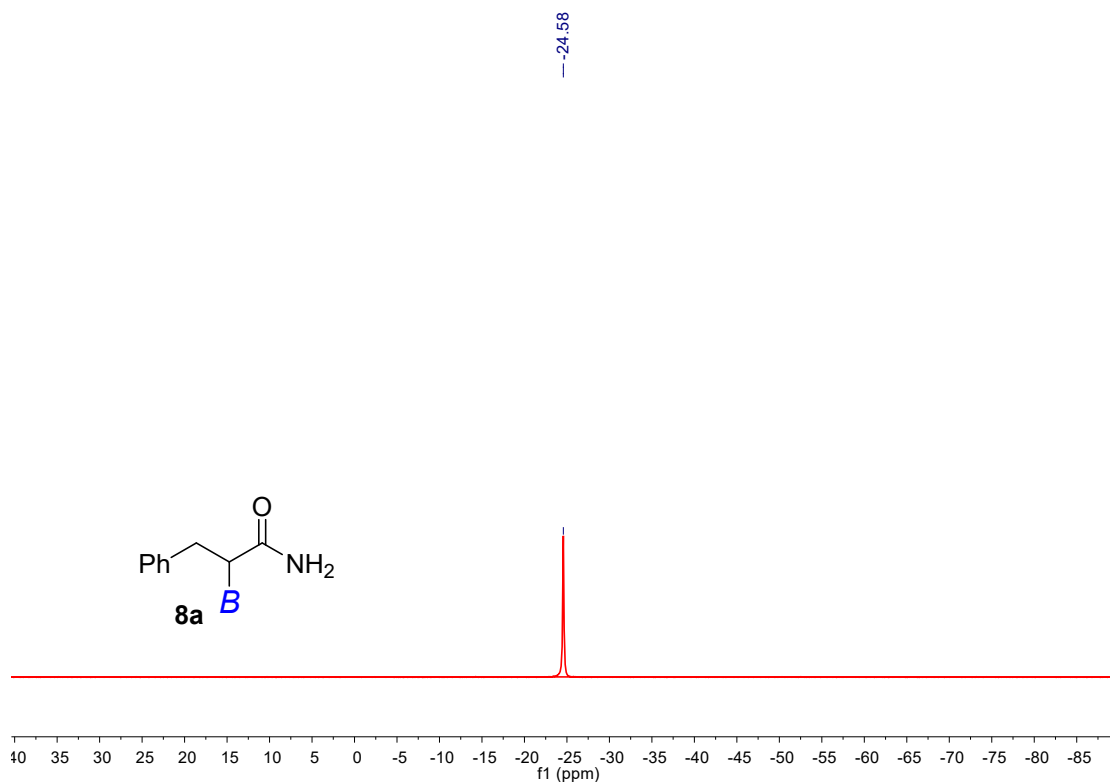

$^{11}\text{B}\{^1\text{H}\}$  NMR (193 MHz,  $\text{CDCl}_3$ )

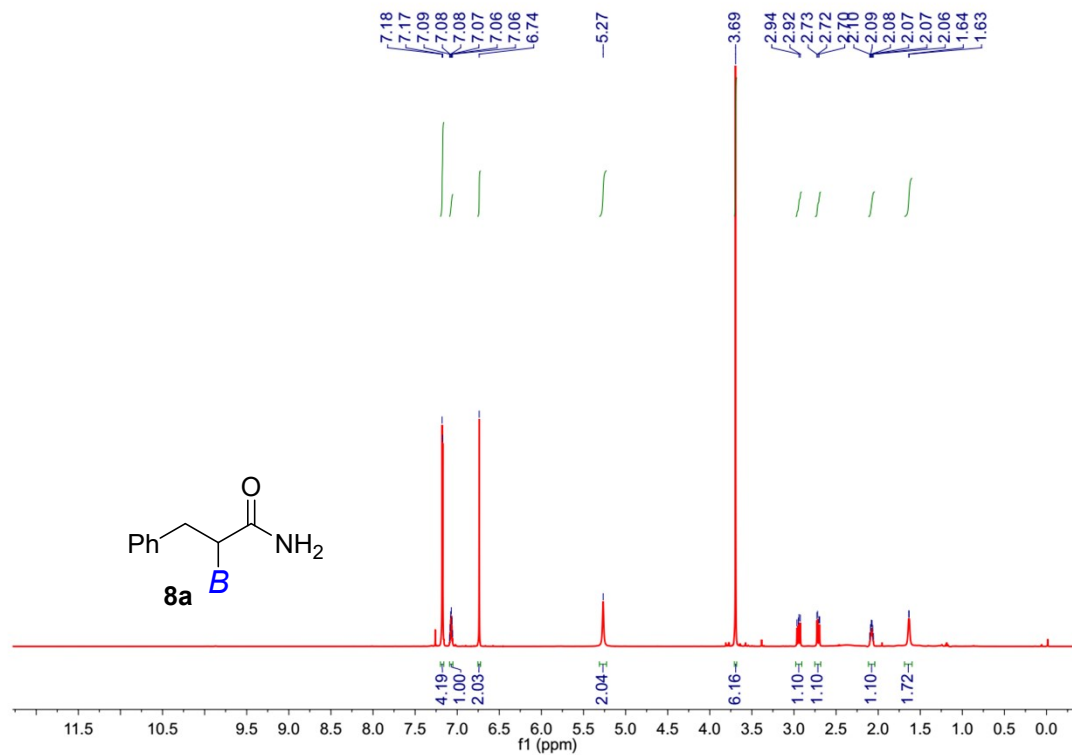

$^1\text{H}\{^{11}\text{B}\}$  NMR (600 MHz,  $\text{CDCl}_3$ )

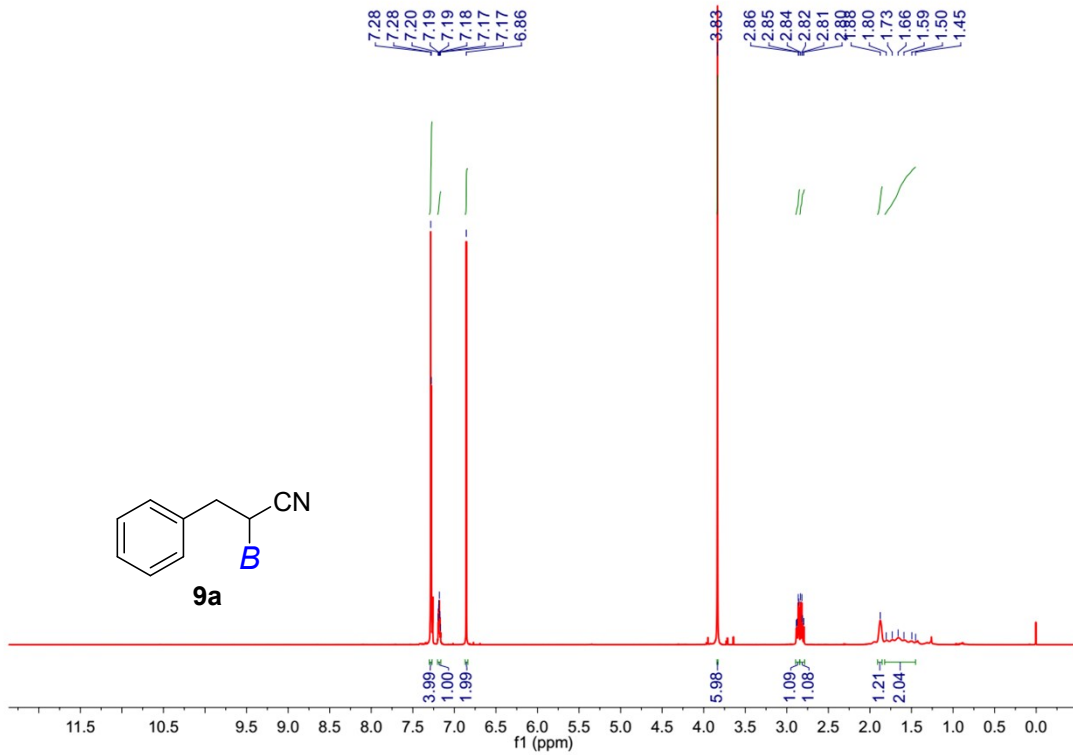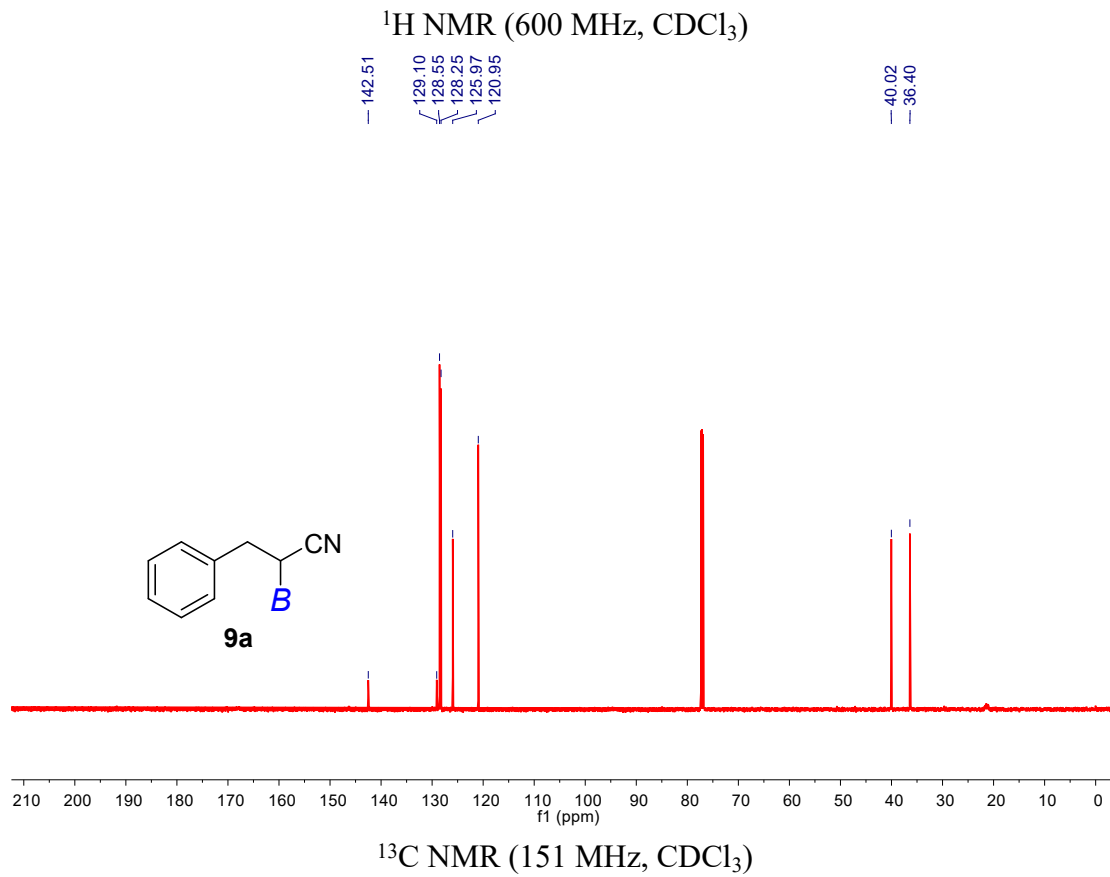

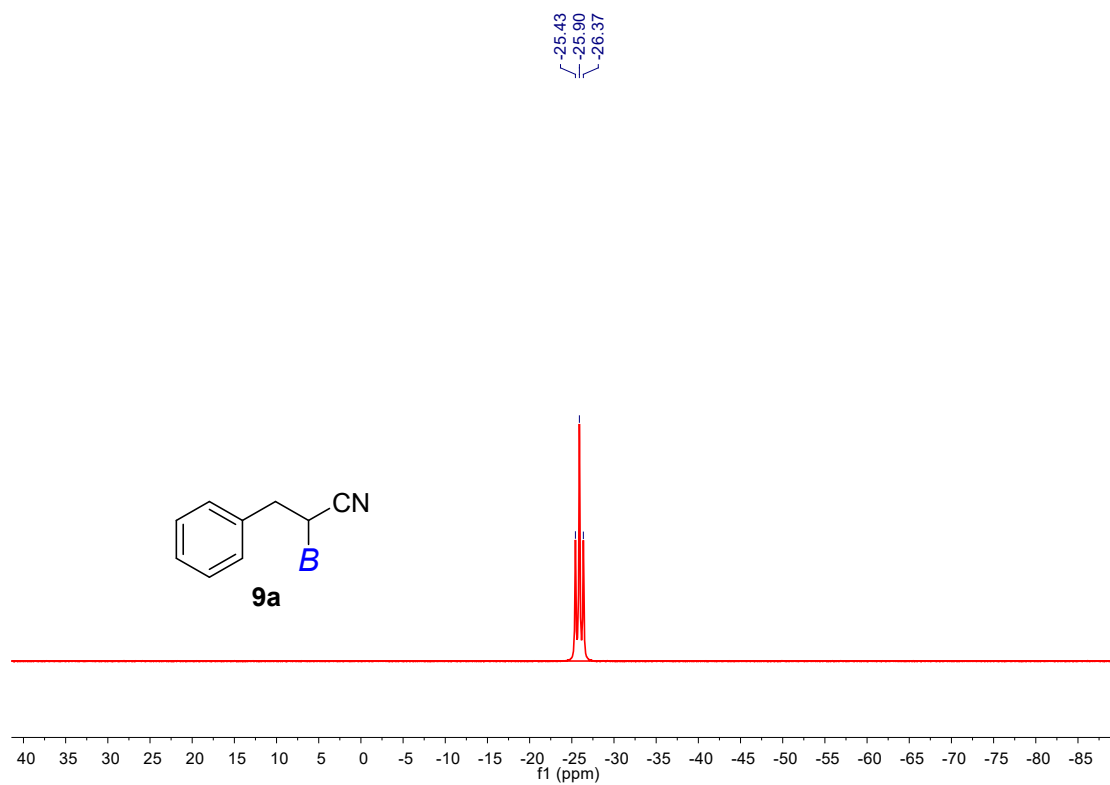

$^{11}\text{B}$  NMR (193 MHz,  $\text{CDCl}_3$ )

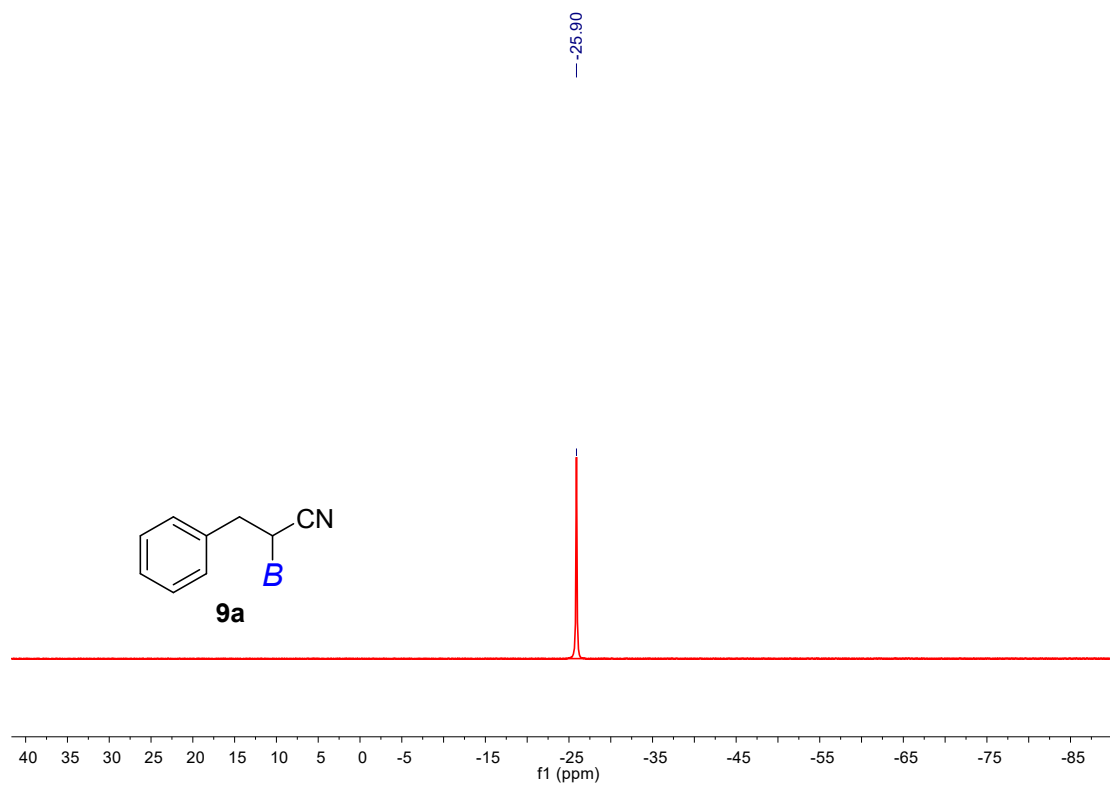

$^{11}\text{B}\{^1\text{H}\}$  NMR (193 MHz,  $\text{CDCl}_3$ )

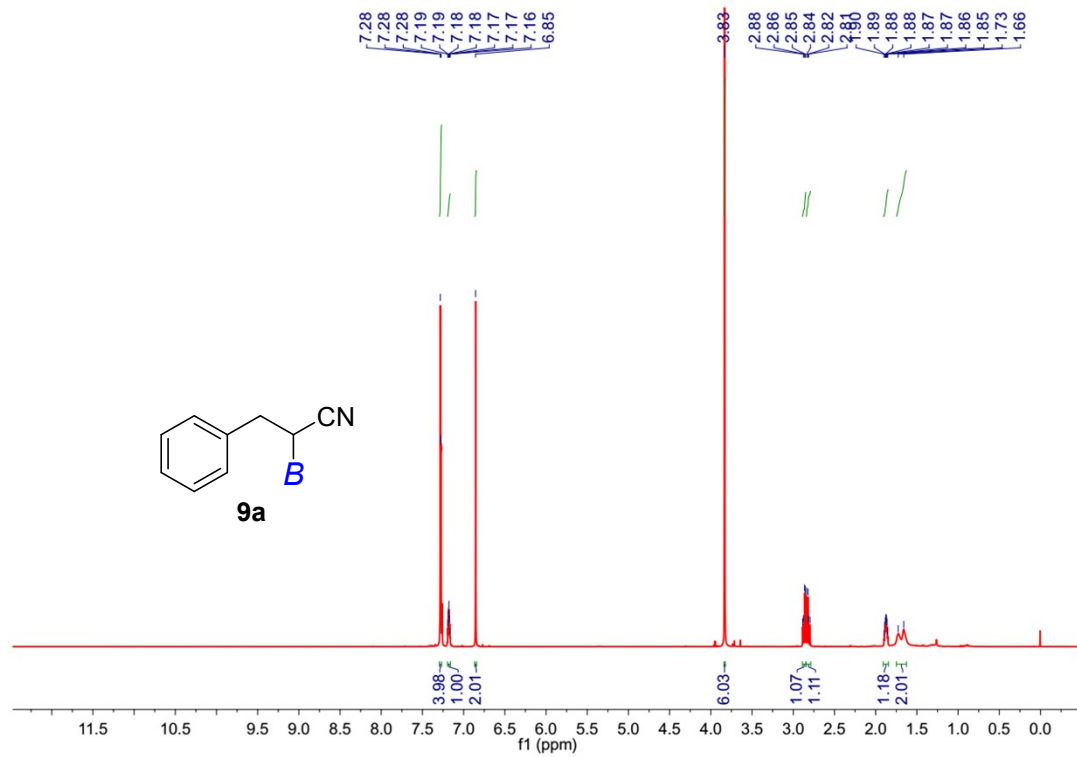

$^1\text{H}\{^{11}\text{B}\}$  NMR (600 MHz,  $\text{CDCl}_3$ )

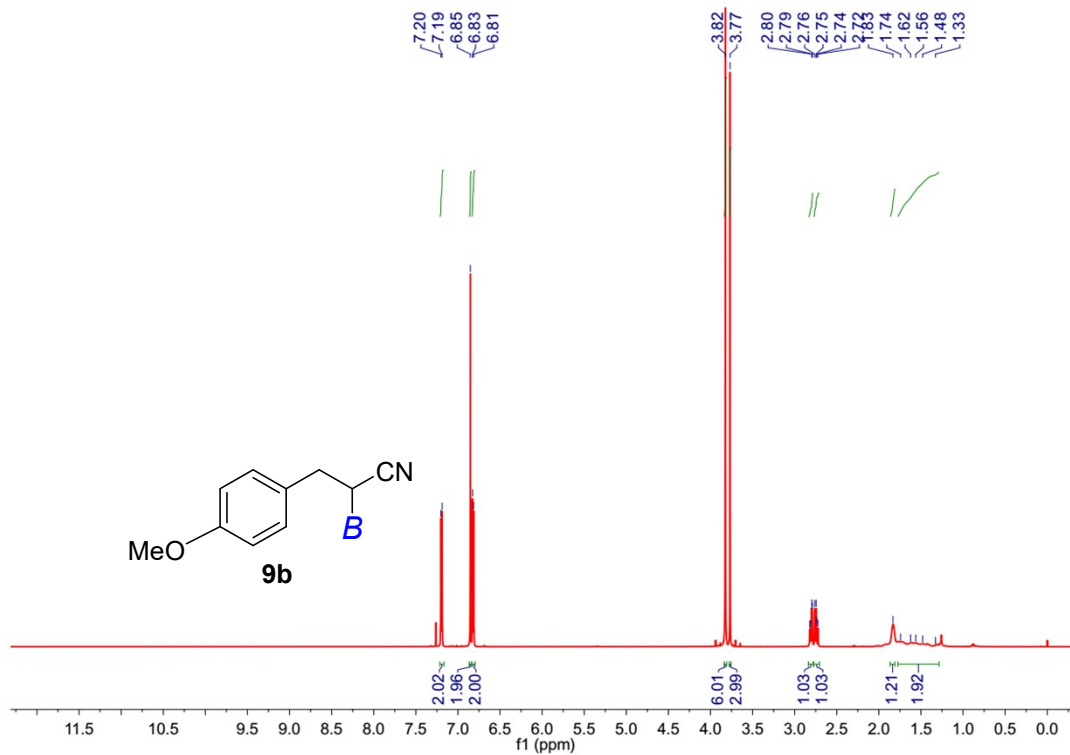

<sup>1</sup>H NMR (600 MHz, CDCl<sub>3</sub>)

157.87  
 134.73  
 129.48  
 129.23  
 120.96  
 113.66  
 55.26  
 39.16  
 36.38

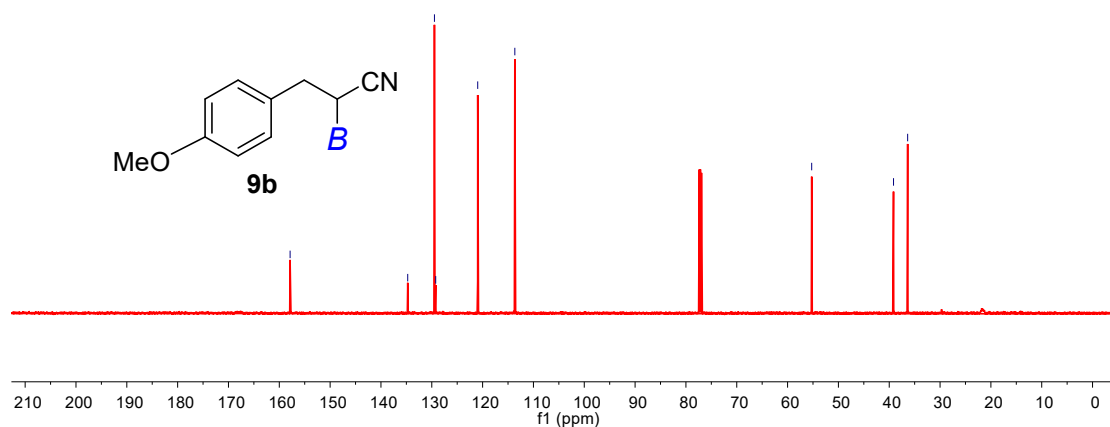

<sup>13</sup>C NMR (151 MHz, CDCl<sub>3</sub>)

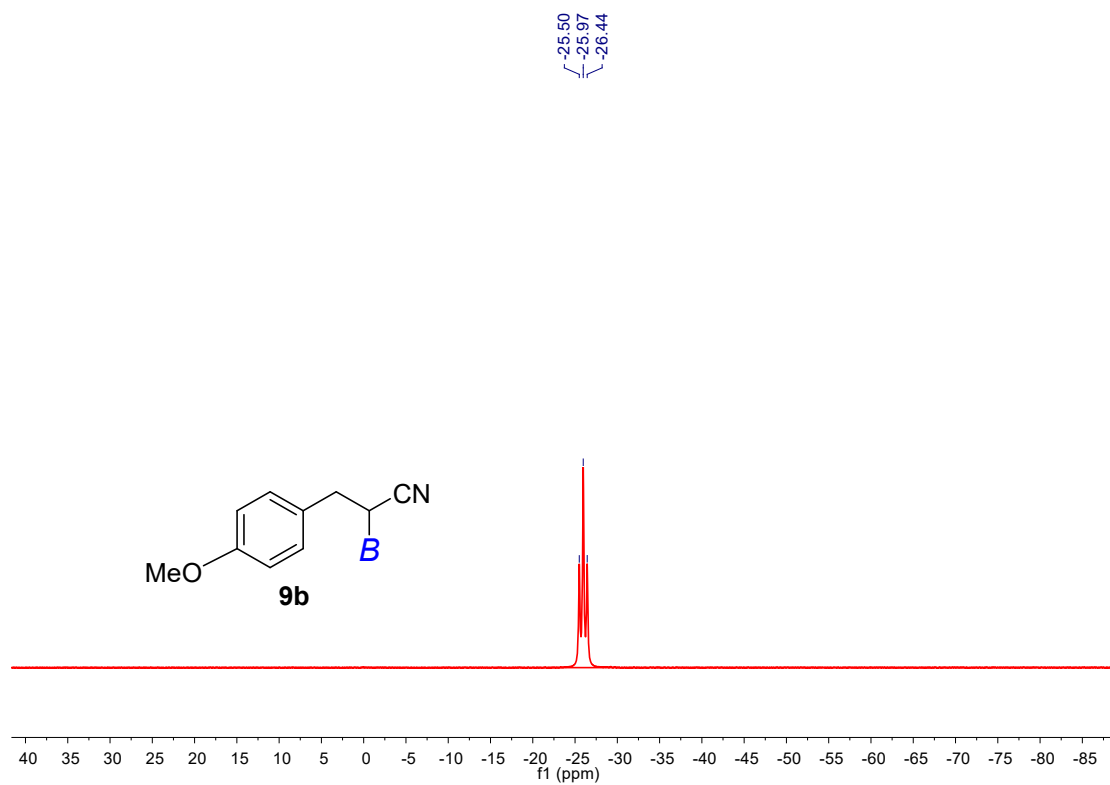

$^{11}\text{B}$  NMR (193 MHz,  $\text{CDCl}_3$ )

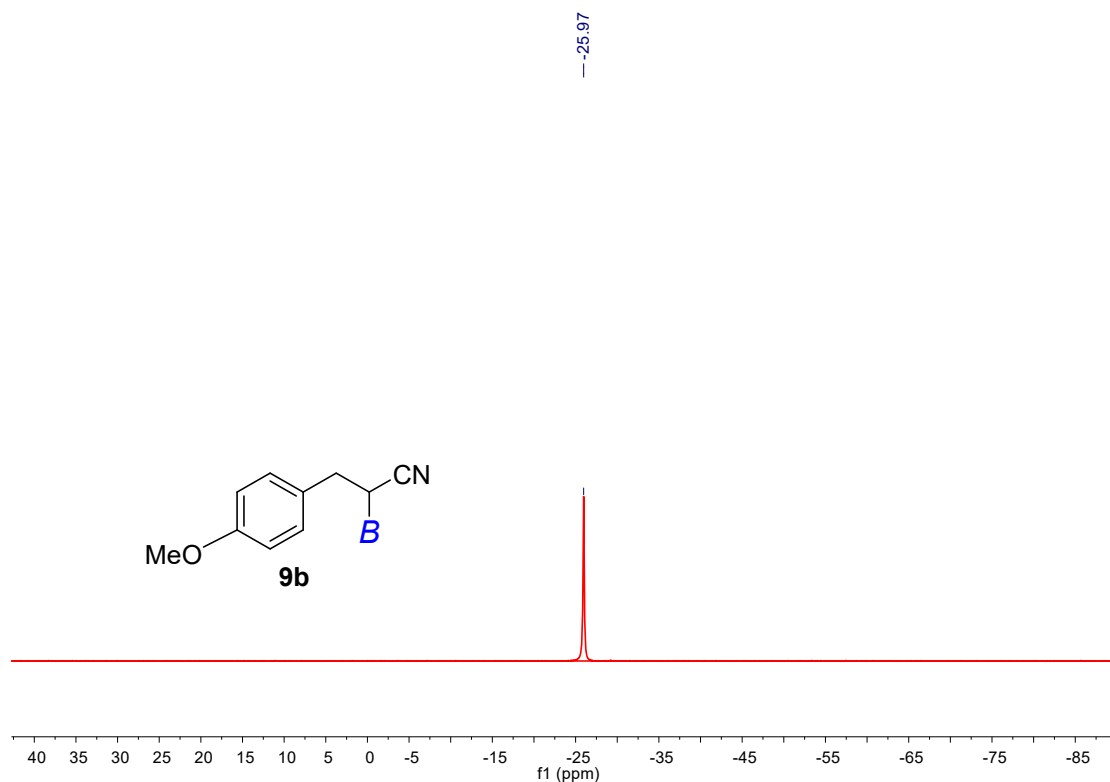

$^{11}\text{B}\{^1\text{H}\}$  NMR (193 MHz,  $\text{CDCl}_3$ )

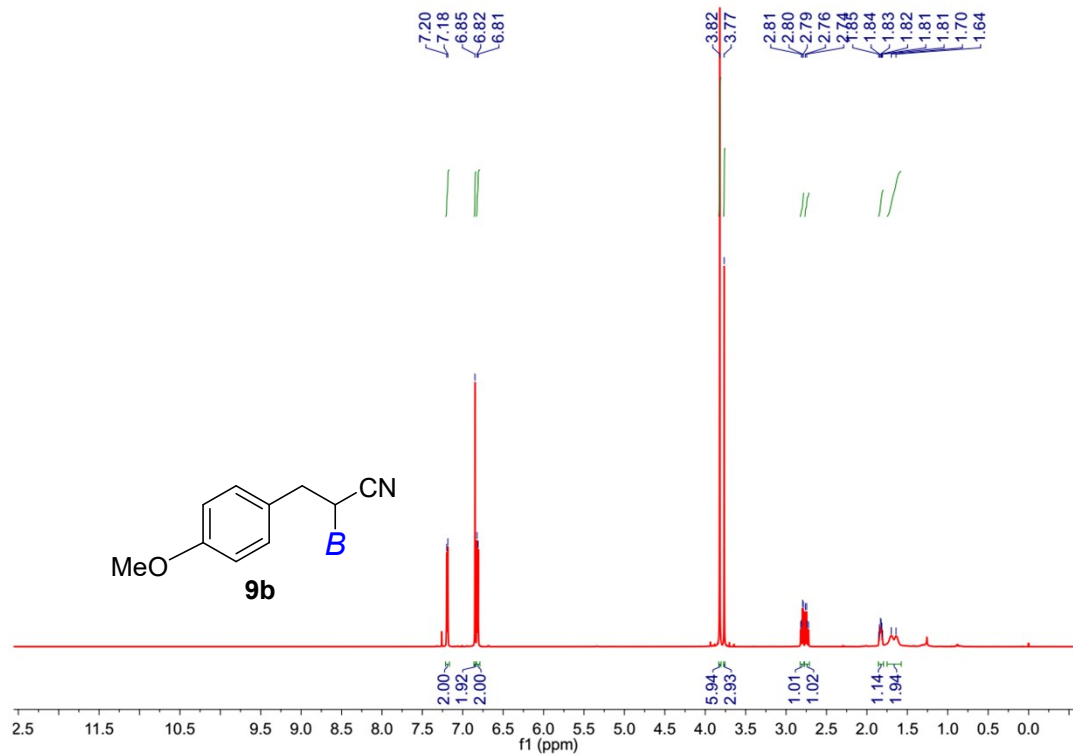

$^1\text{H}\{^{11}\text{B}\}$  NMR (600 MHz,  $\text{CDCl}_3$ )



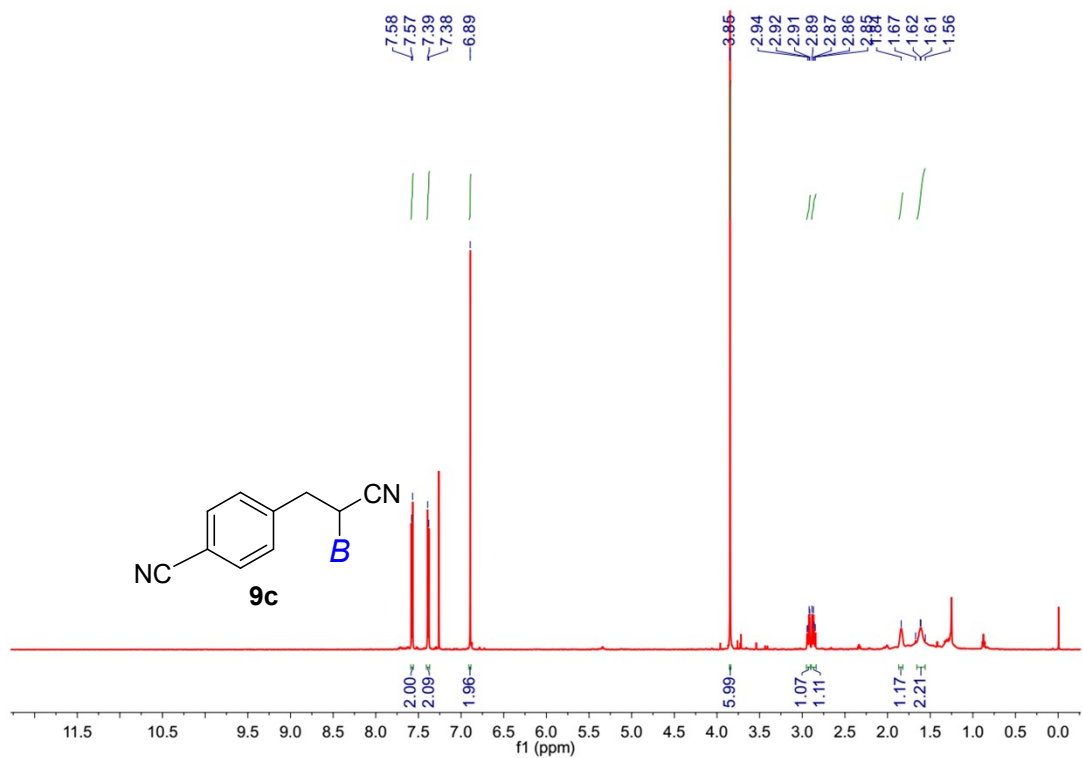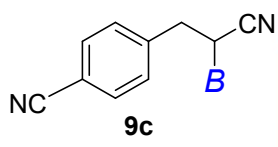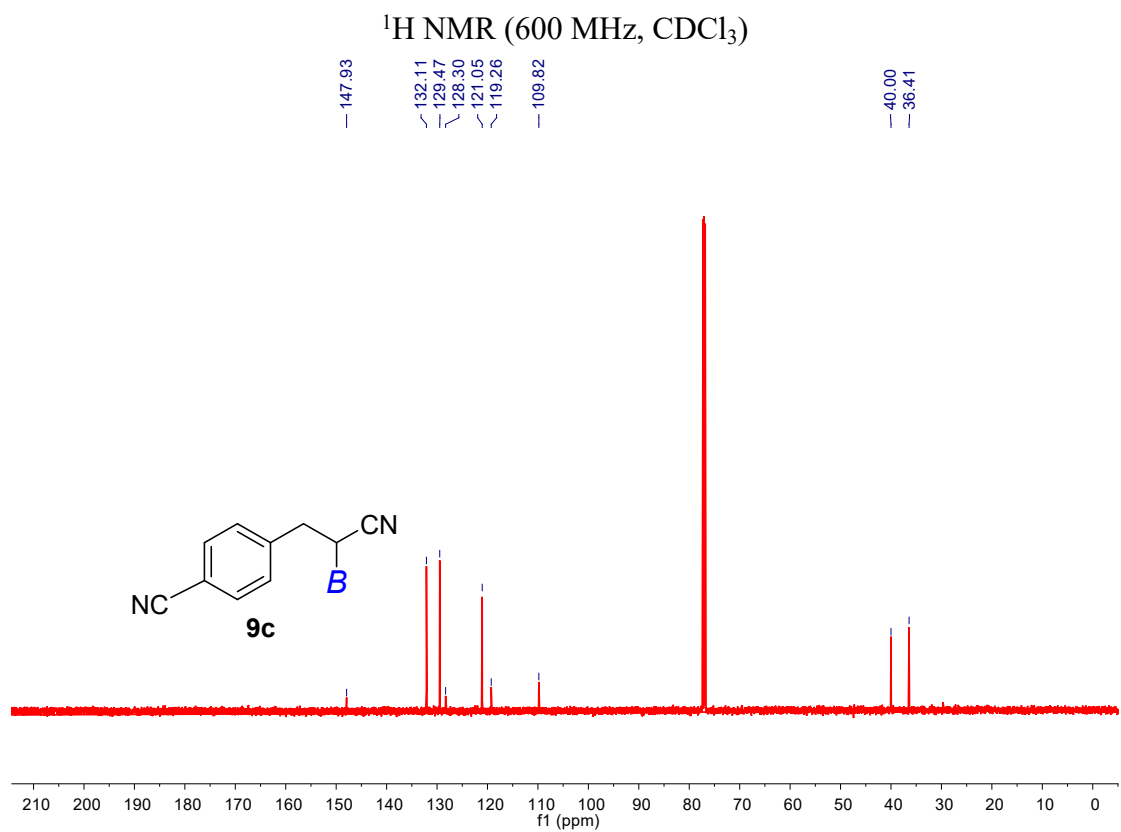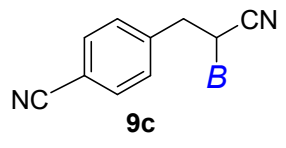

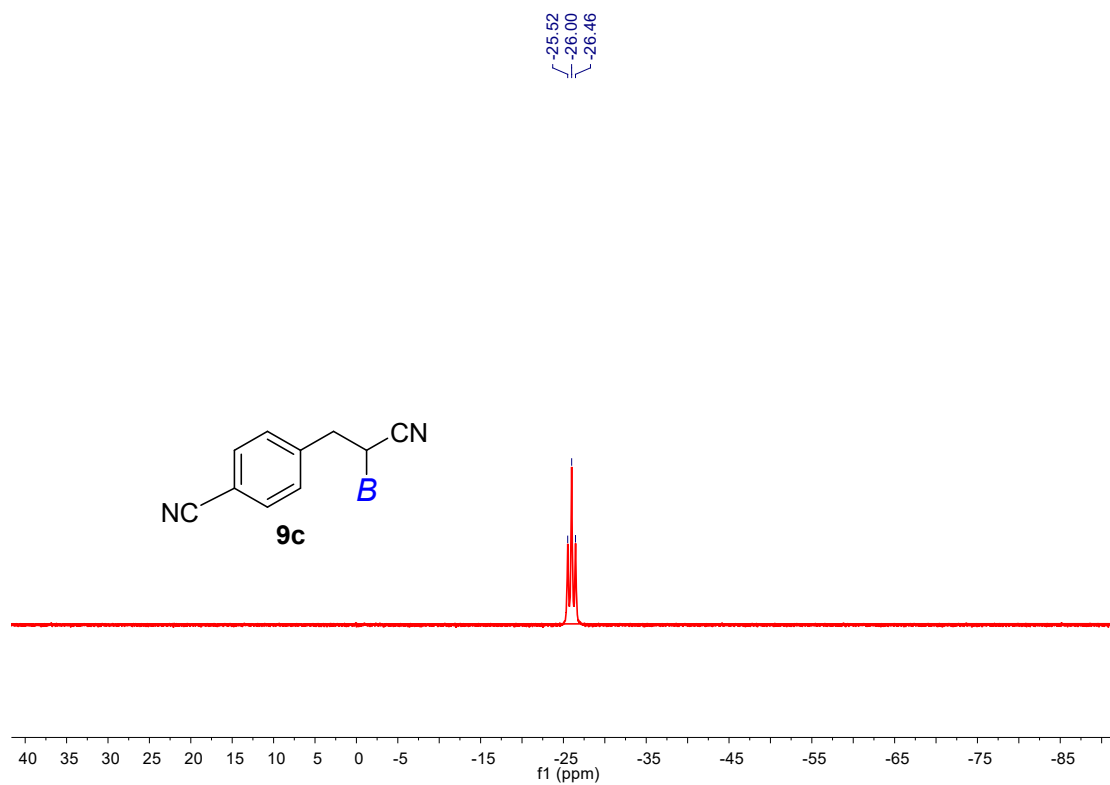

$^{11}\text{B}$  NMR (193 MHz,  $\text{CDCl}_3$ )

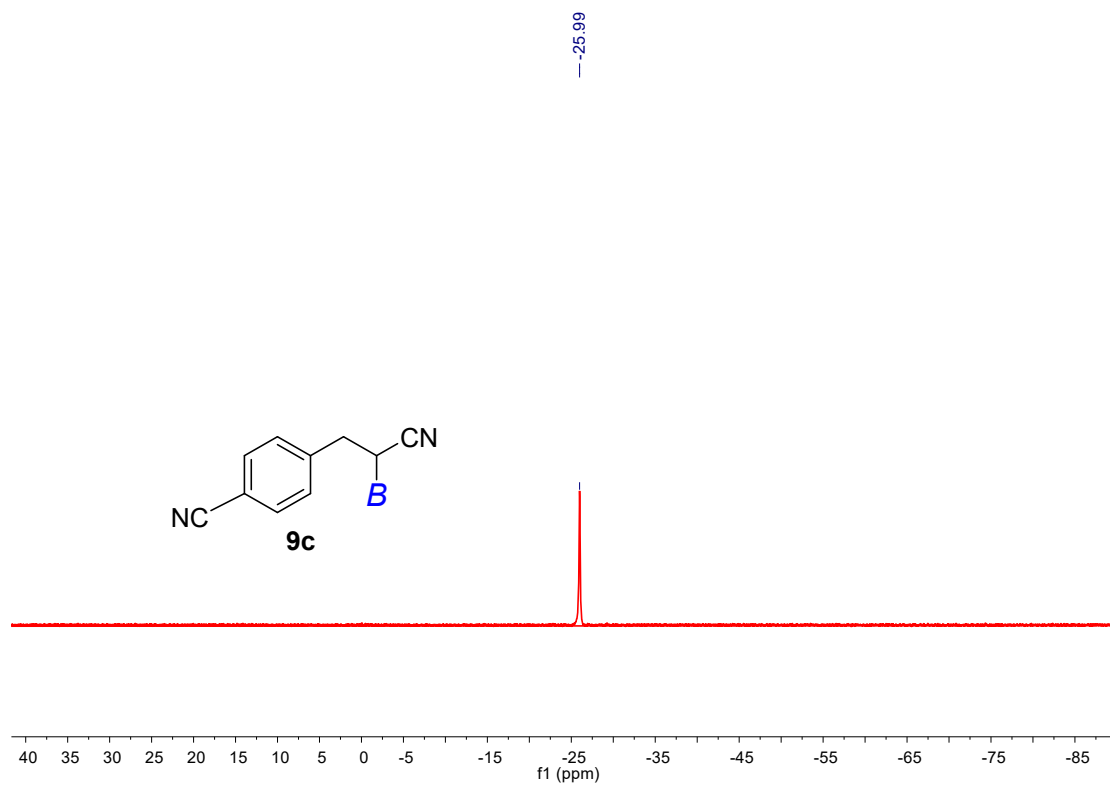

$^{11}\text{B}\{^1\text{H}\}$  NMR (193 MHz,  $\text{CDCl}_3$ )

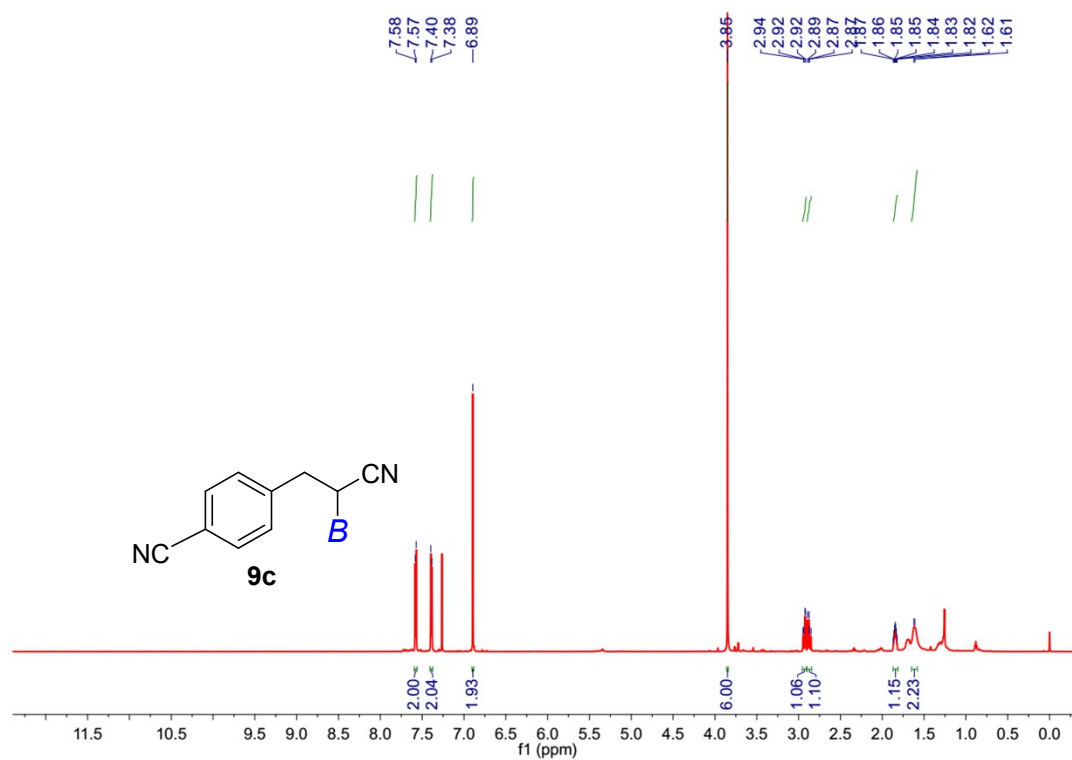

$^1\text{H}\{^{11}\text{B}\}$  NMR (600 MHz,  $\text{CDCl}_3$ )

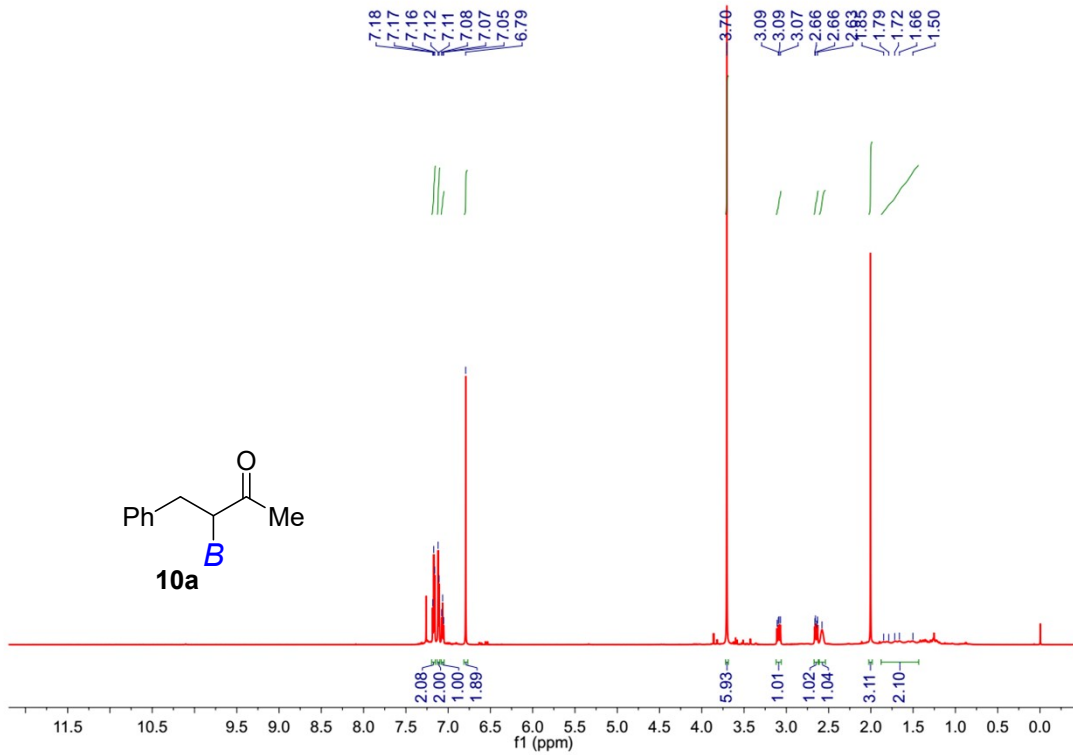

— 217.52

<sup>1</sup>H NMR (600 MHz, CDCl<sub>3</sub>)

— 144.39

128.27  
127.95  
125.06  
120.63

38.34  
36.15  
28.30

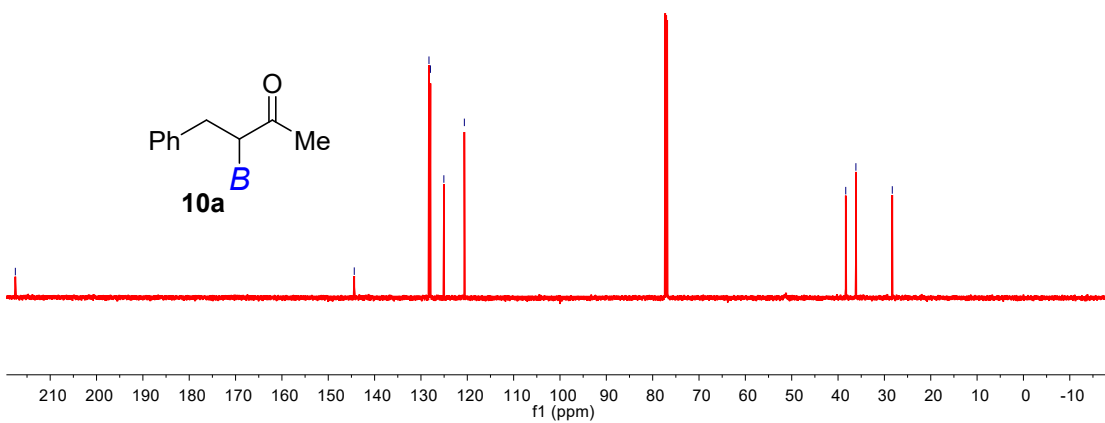

<sup>13</sup>C NMR (151 MHz, CDCl<sub>3</sub>)

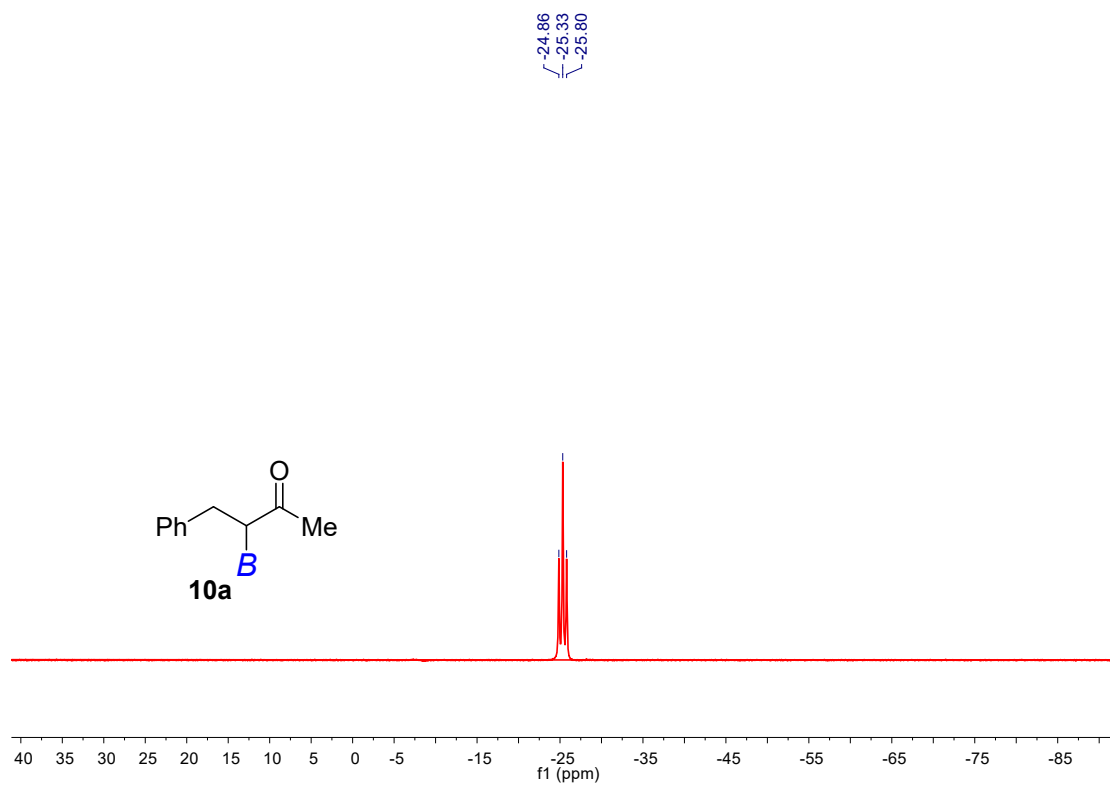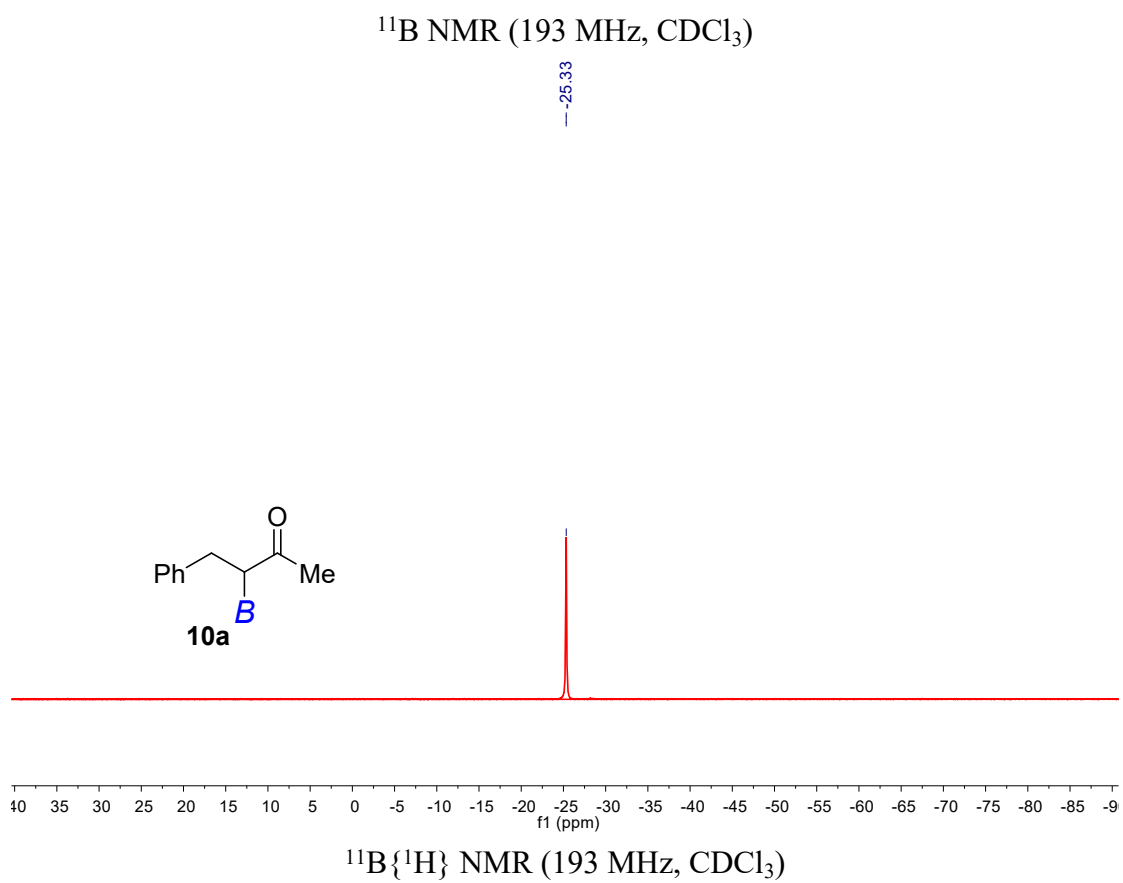

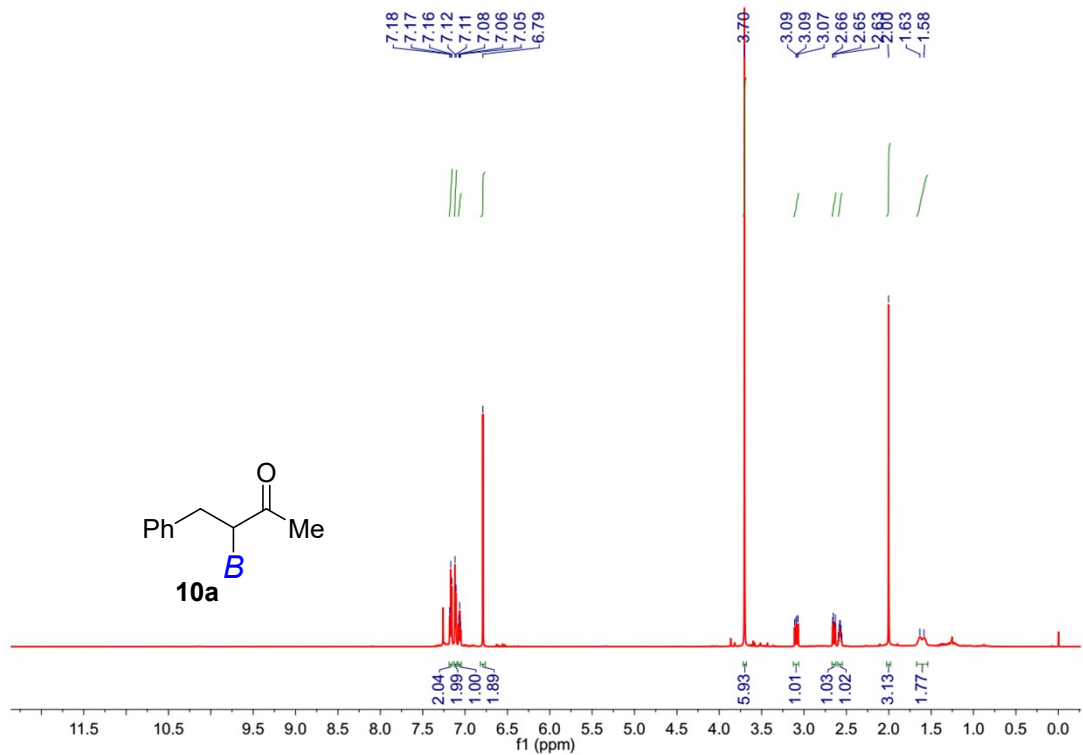

$^1\text{H}\{^{11}\text{B}\}$  NMR (600 MHz,  $\text{CDCl}_3$ )

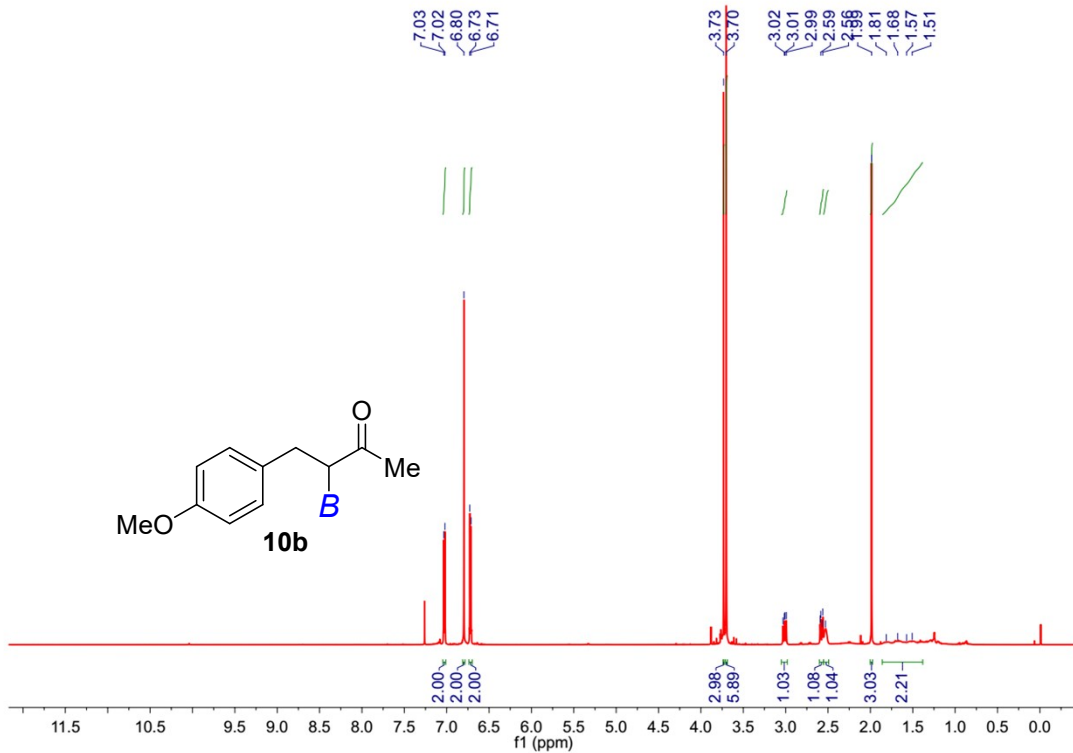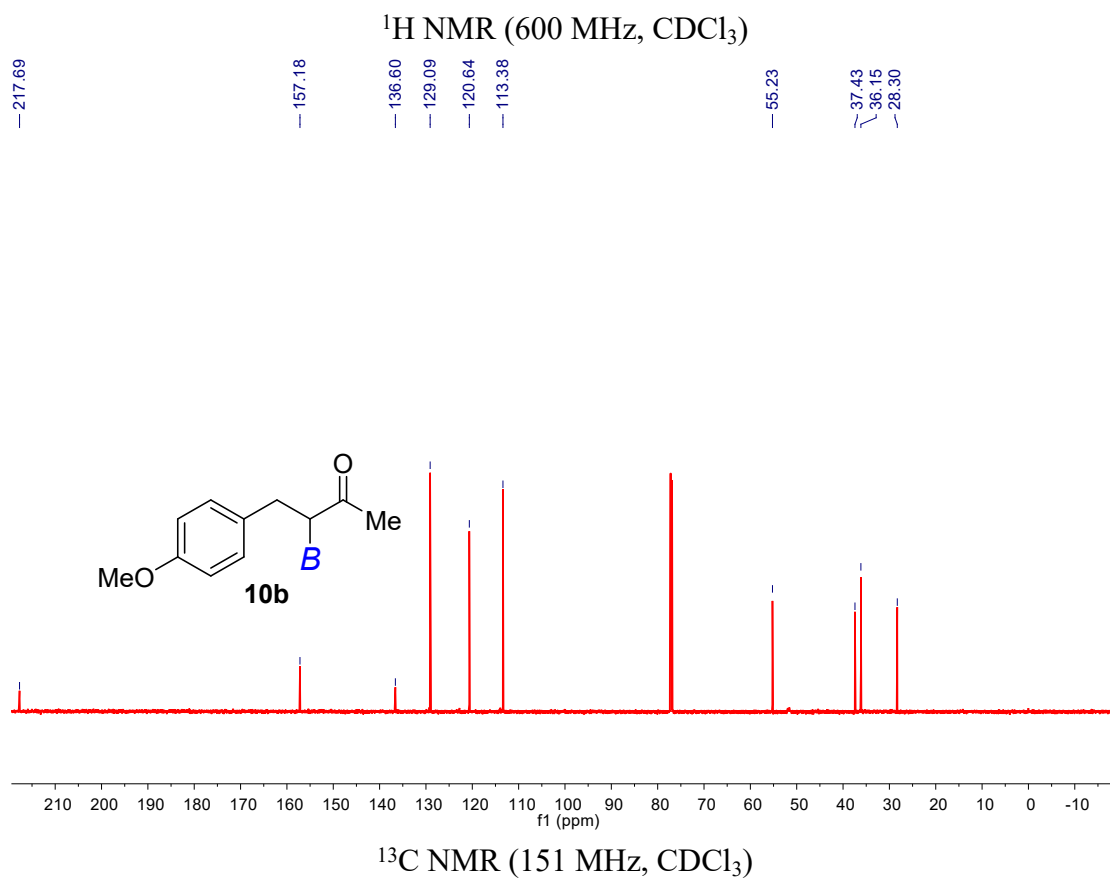

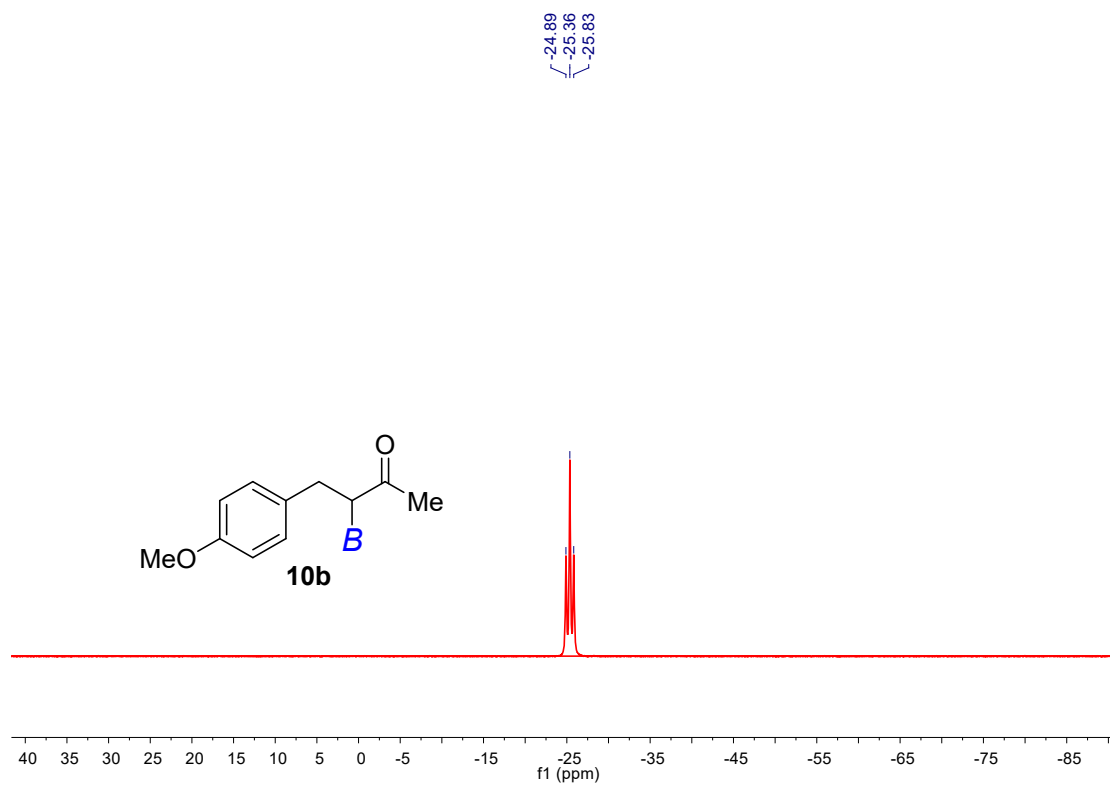

<sup>11</sup>B NMR (193 MHz, CDCl<sub>3</sub>)

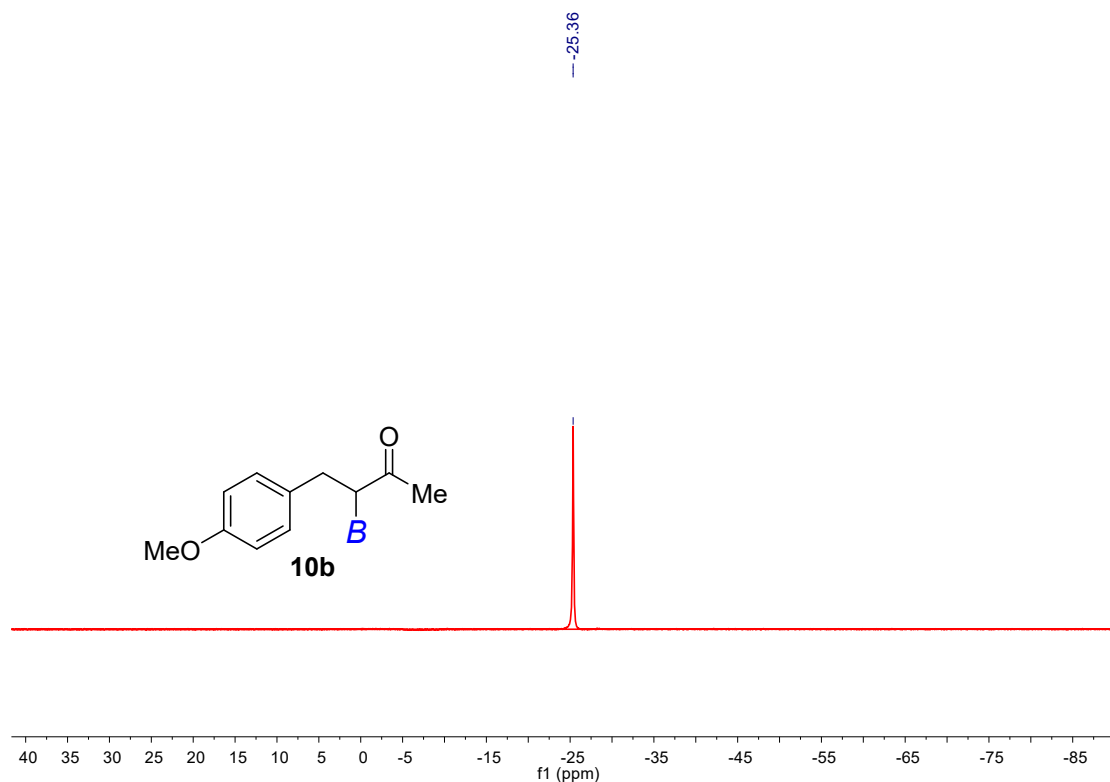

<sup>11</sup>B{<sup>1</sup>H} NMR (193 MHz, CDCl<sub>3</sub>)



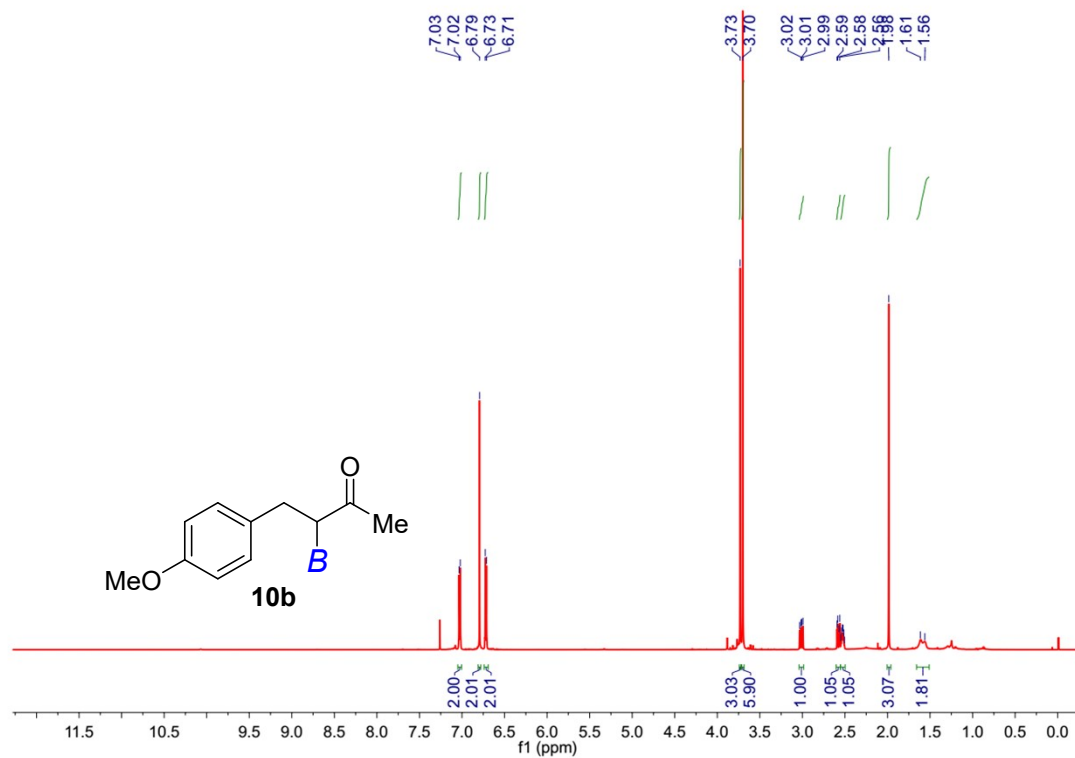

$^1\text{H}\{^{11}\text{B}\}$  NMR (600 MHz,  $\text{CDCl}_3$ )

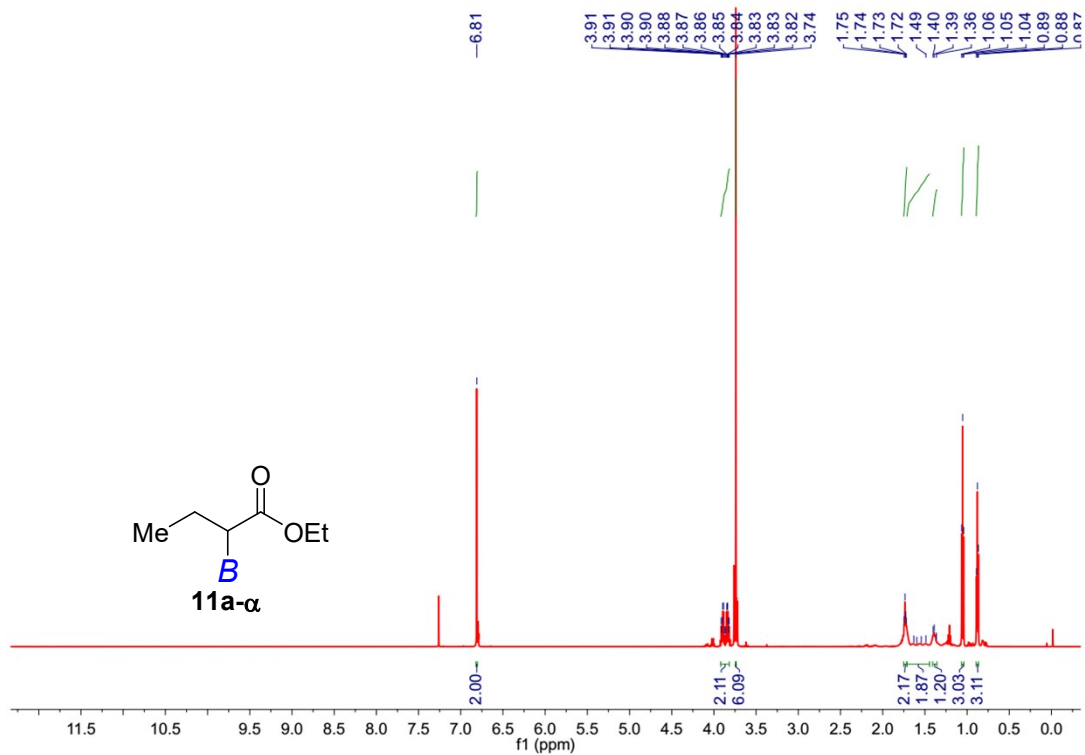

<sup>1</sup>H NMR (600 MHz, CDCl<sub>3</sub>)

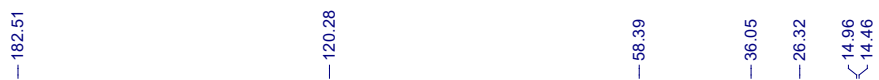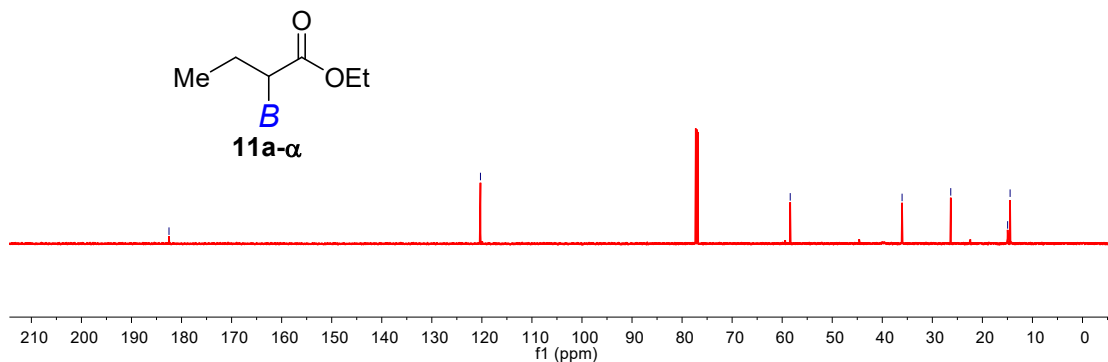

<sup>13</sup>C NMR (151 MHz, CDCl<sub>3</sub>)

-24.84  
-25.30  
-25.77

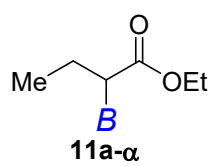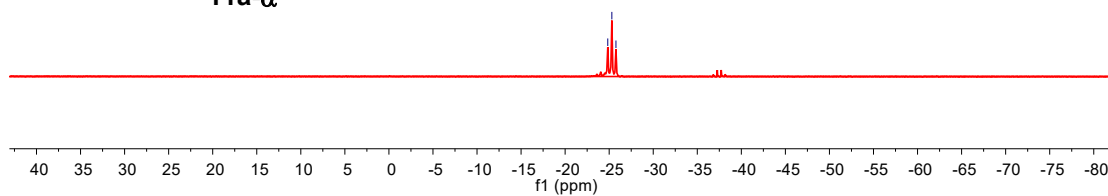

$^{11}\text{B}$  NMR (193 MHz,  $\text{CDCl}_3$ )

-25.31

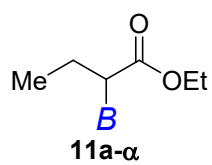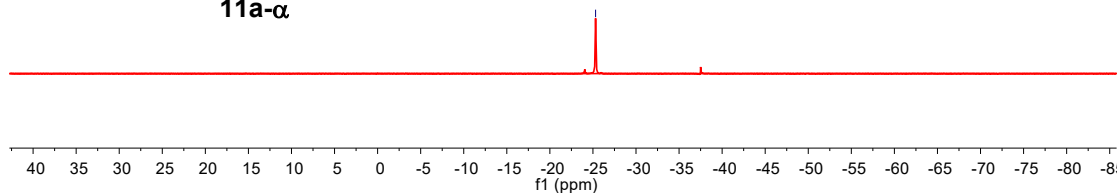

$^{11}\text{B}\{^1\text{H}\}$  NMR (193 MHz,  $\text{CDCl}_3$ )

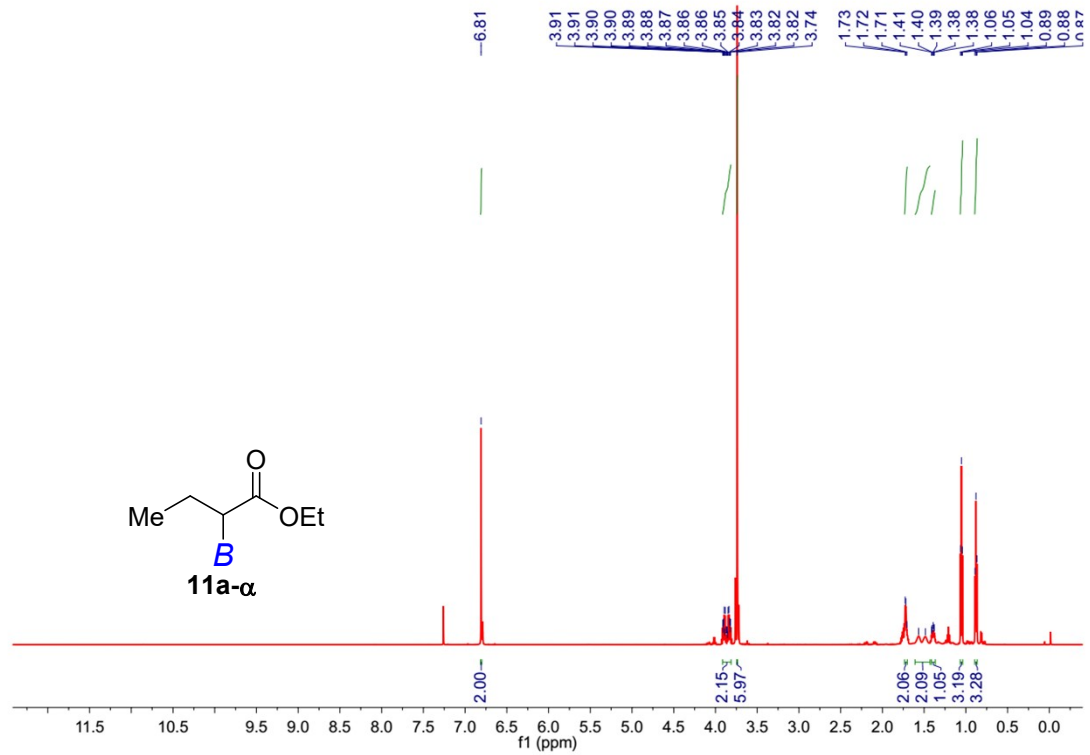

$^1\text{H}\{^{11}\text{B}\}$  NMR (600 MHz,  $\text{CDCl}_3$ )

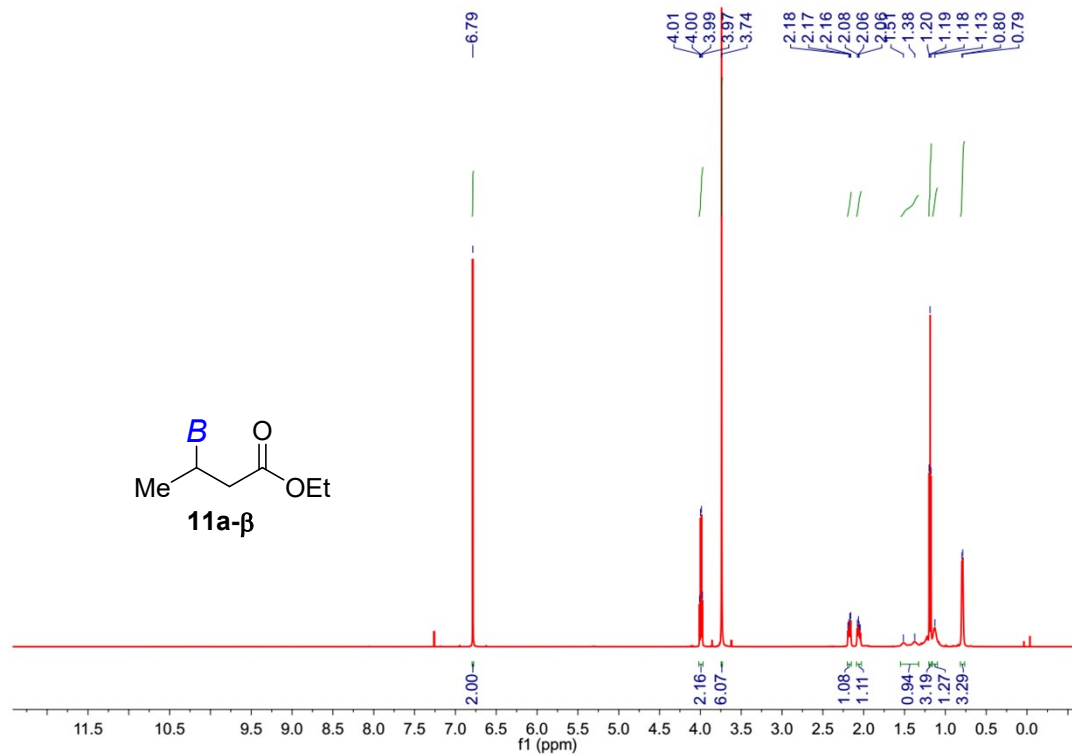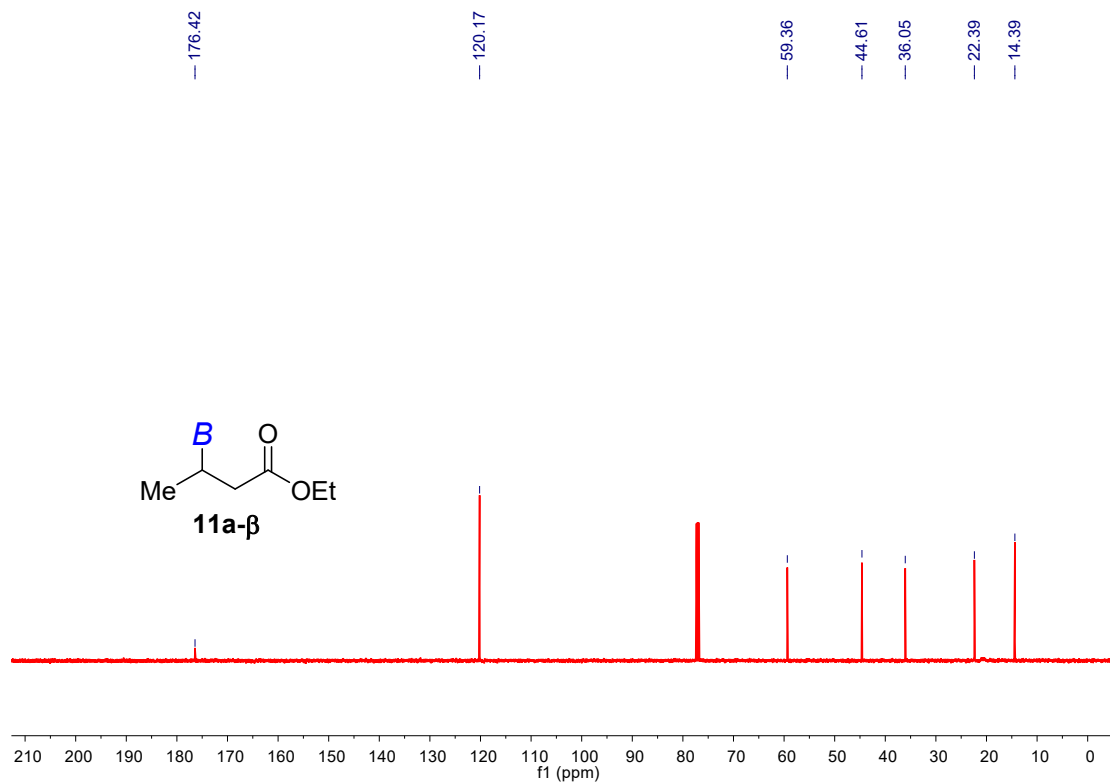

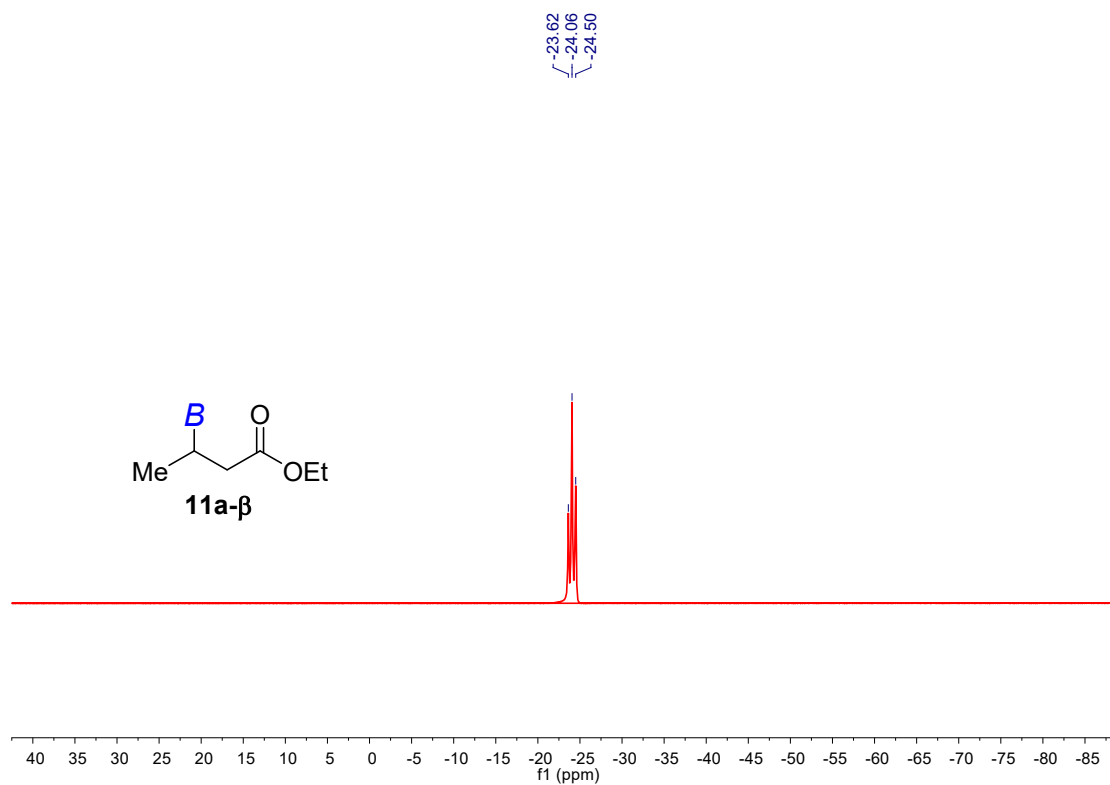

$^{11}\text{B}$  NMR (193 MHz,  $\text{CDCl}_3$ )

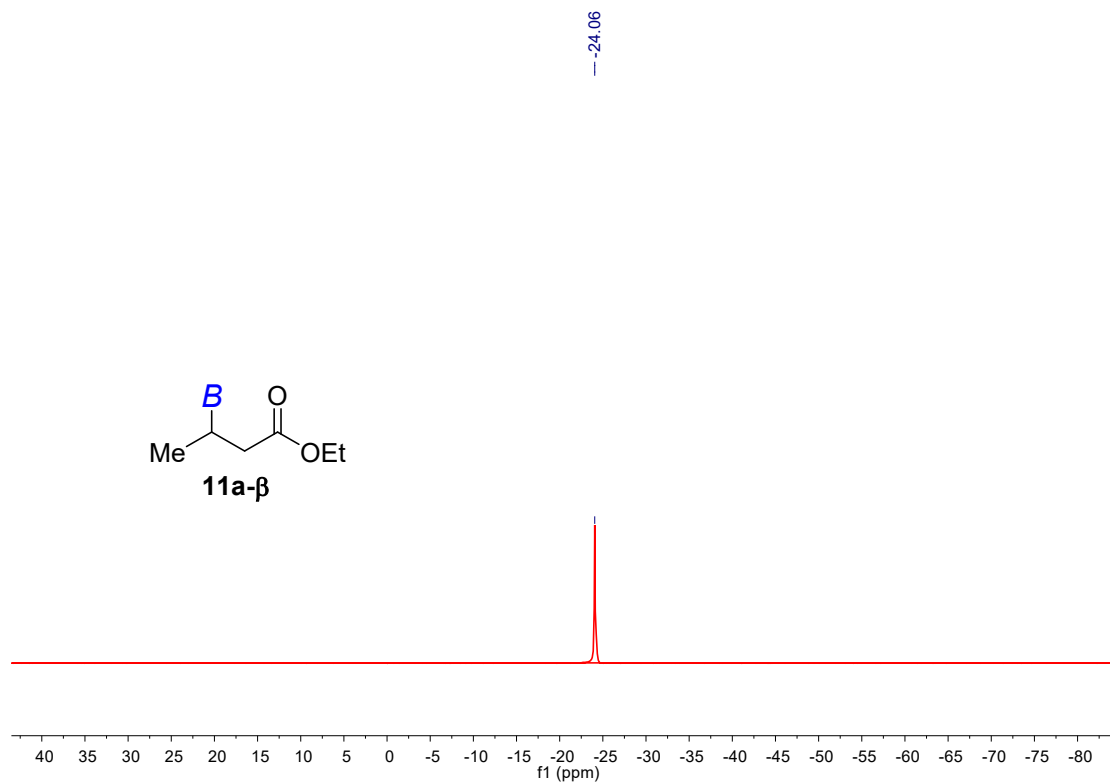

$^{11}\text{B}\{^1\text{H}\}$  NMR (193 MHz,  $\text{CDCl}_3$ )

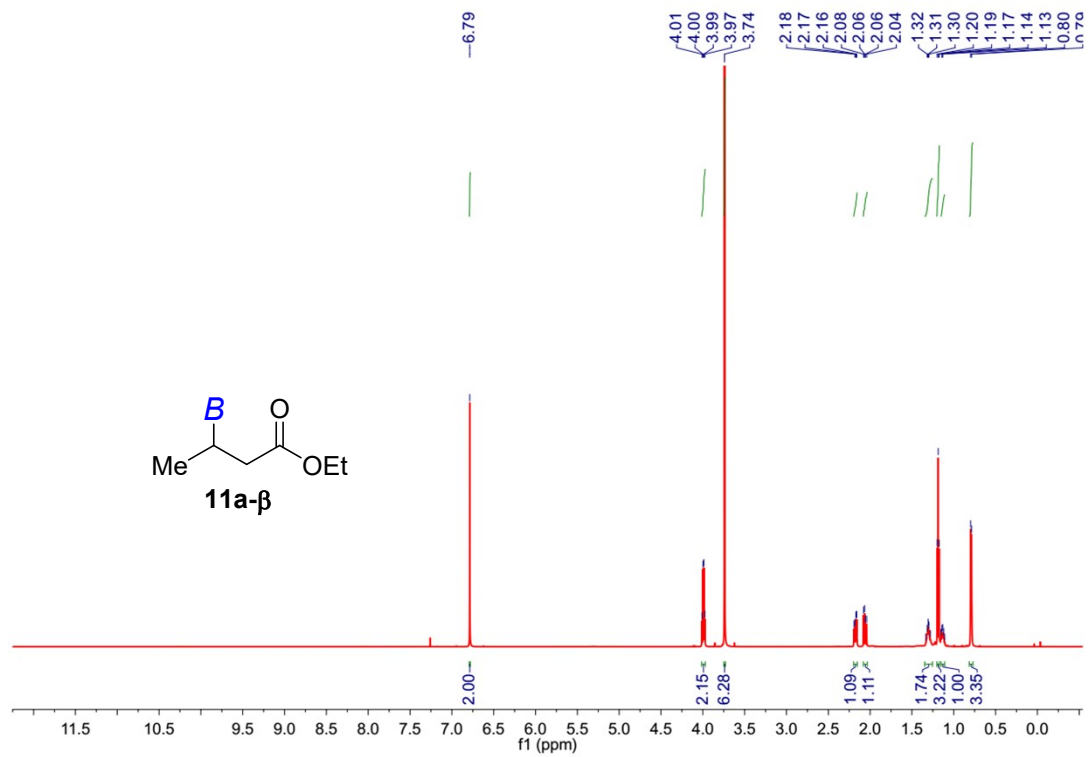

<sup>1</sup>H{<sup>11</sup>B} NMR (600 MHz, CDCl<sub>3</sub>)

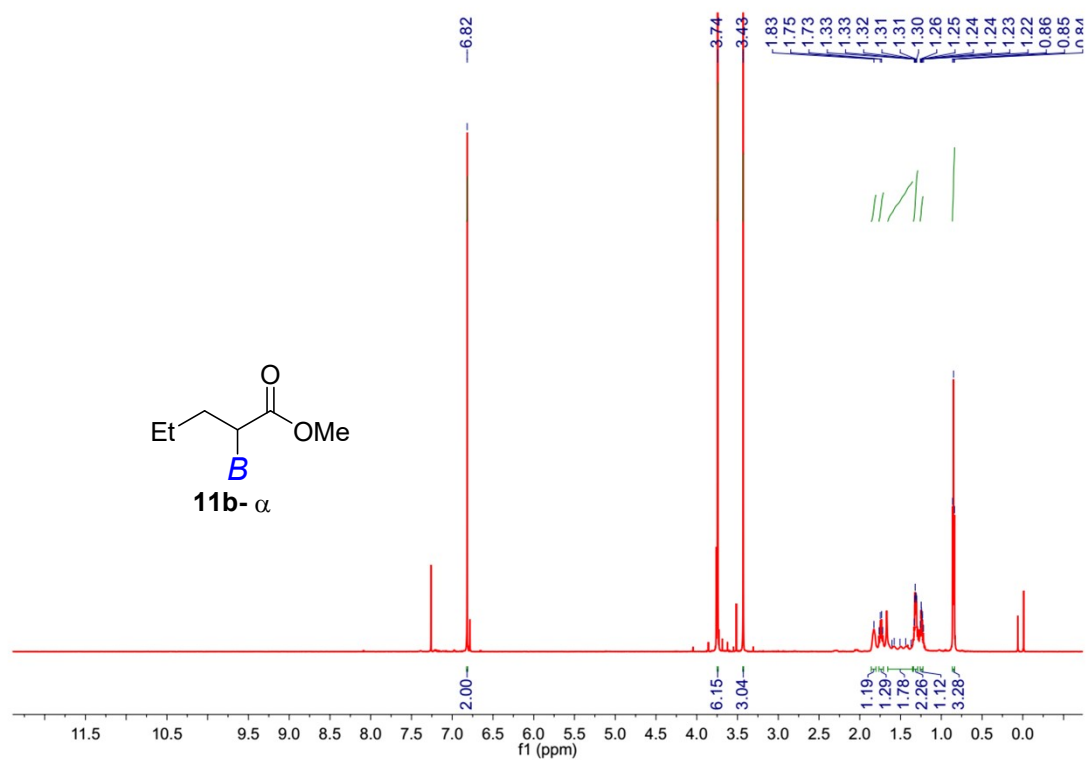

$^1\text{H NMR}$  (600 MHz,  $\text{CDCl}_3$ )

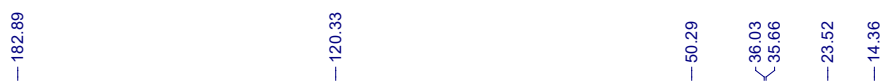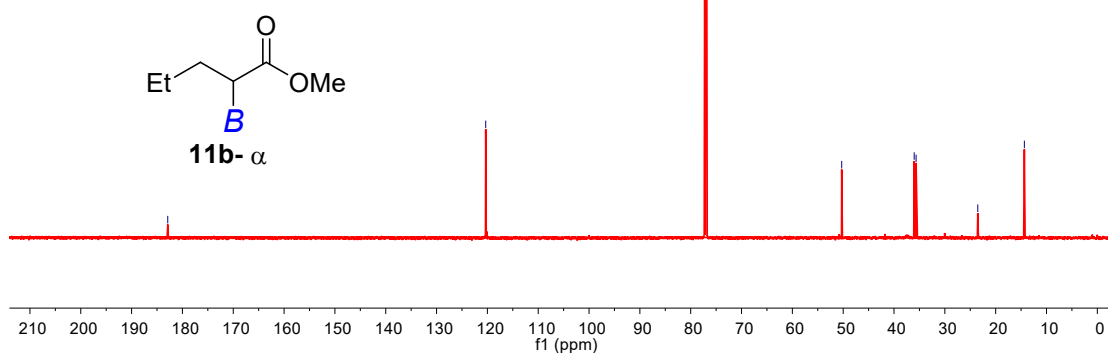

$^{13}\text{C NMR}$  (151 MHz,  $\text{CDCl}_3$ )



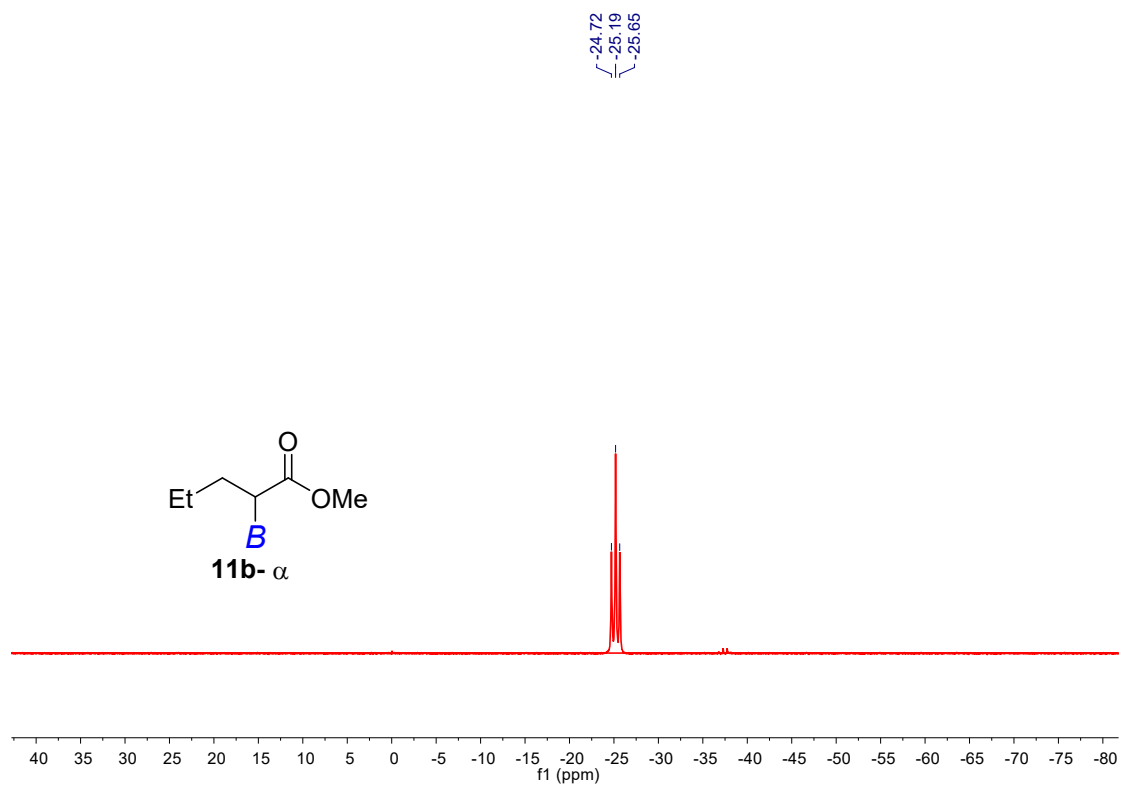

$^{11}\text{B}$  NMR (193 MHz,  $\text{CDCl}_3$ )

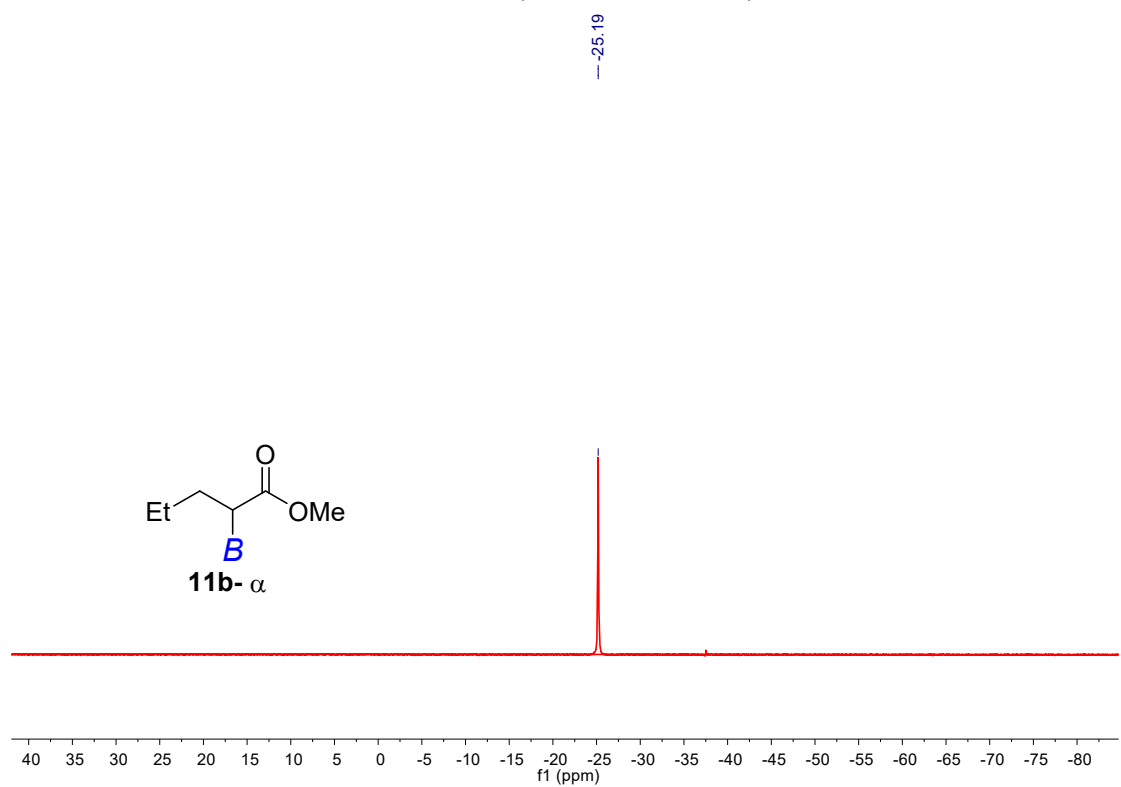

$^{11}\text{B}\{^1\text{H}\}$  NMR (193 MHz,  $\text{CDCl}_3$ )

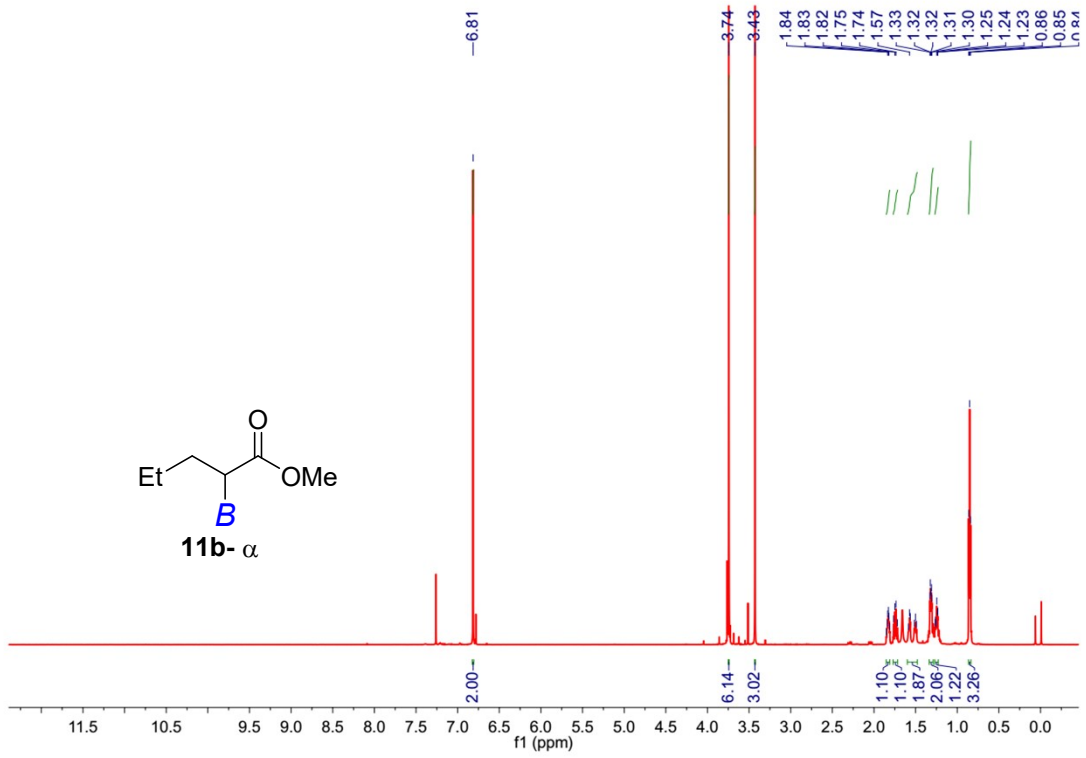

$^1\text{H}\{^{11}\text{B}\}$  NMR (600 MHz,  $\text{CDCl}_3$ )

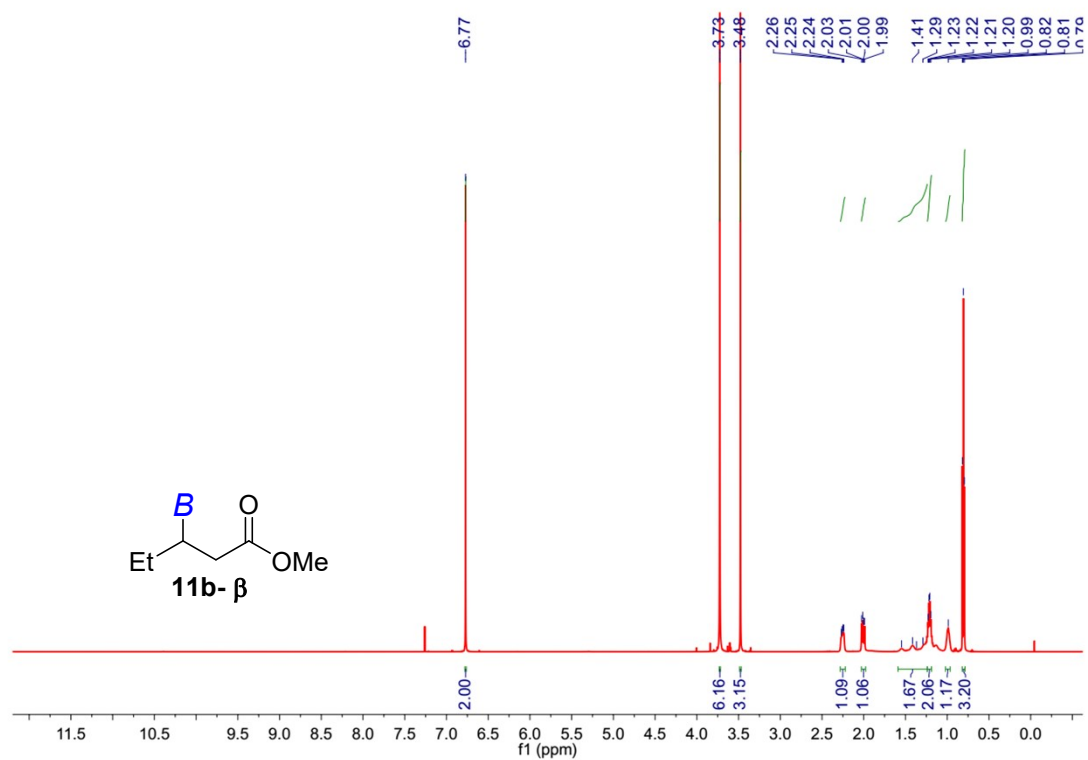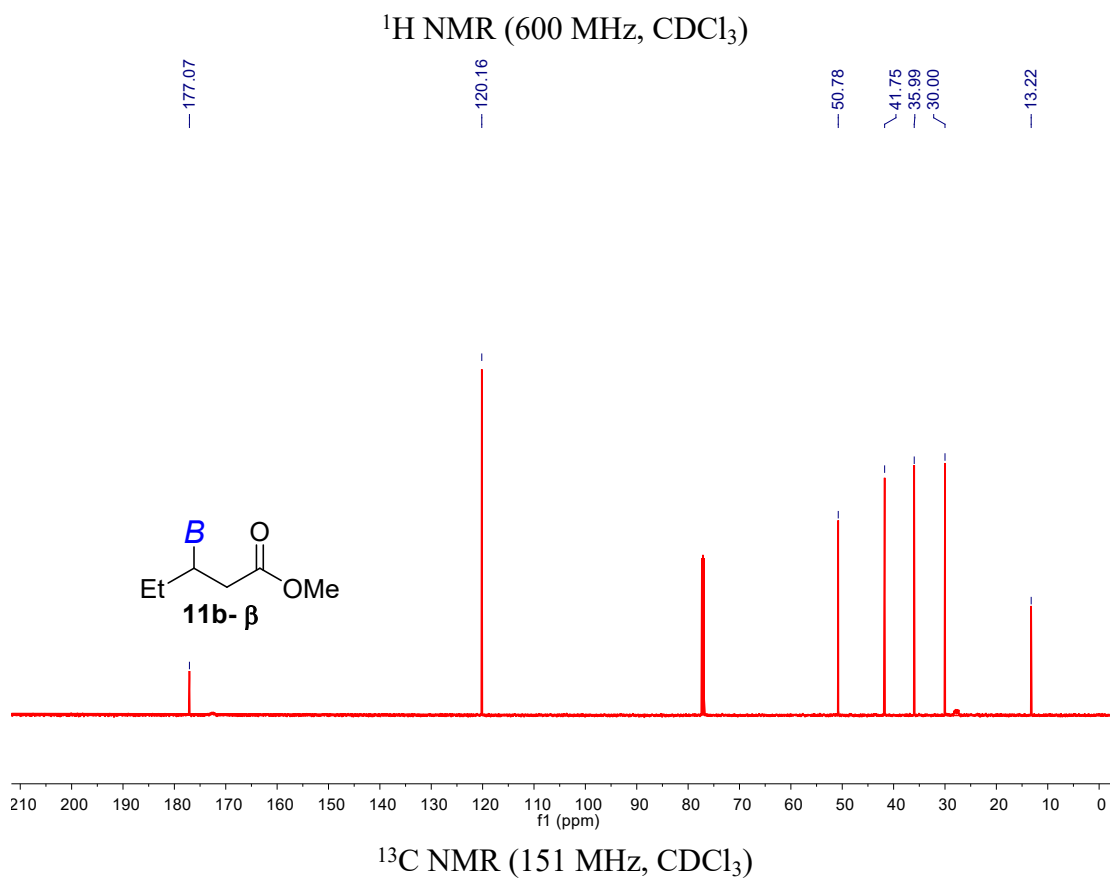

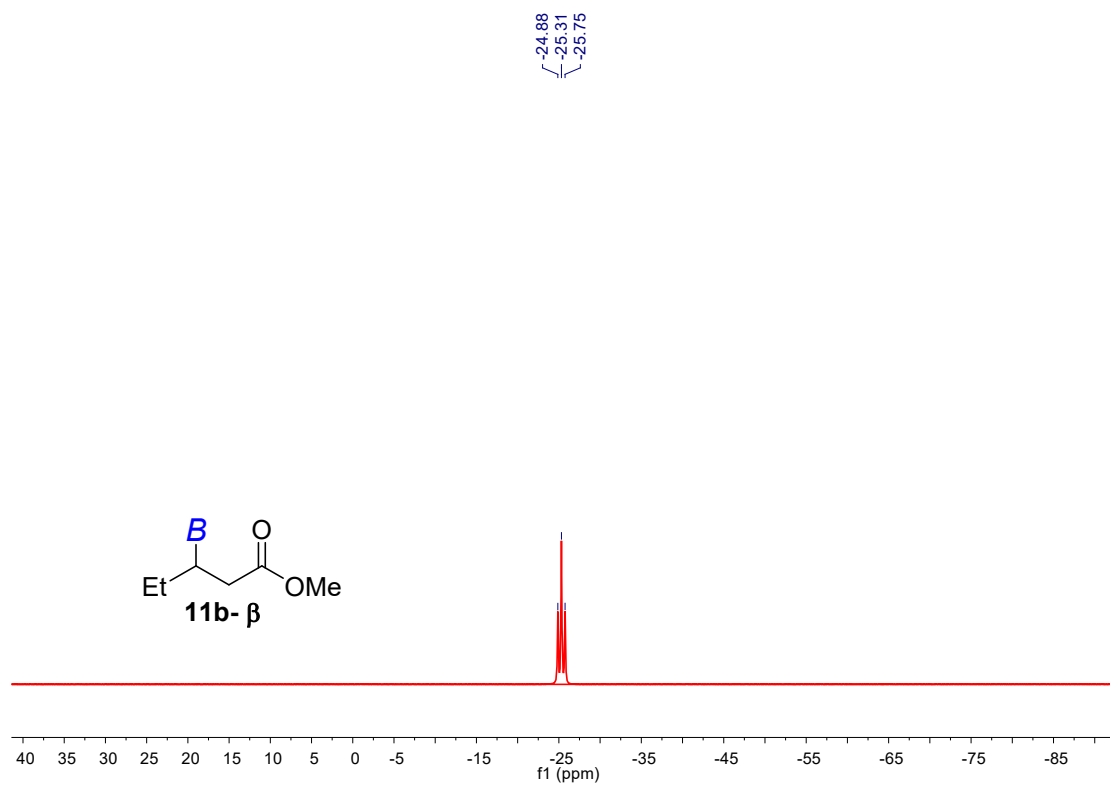

$^{11}\text{B}$  NMR (193 MHz,  $\text{CDCl}_3$ )

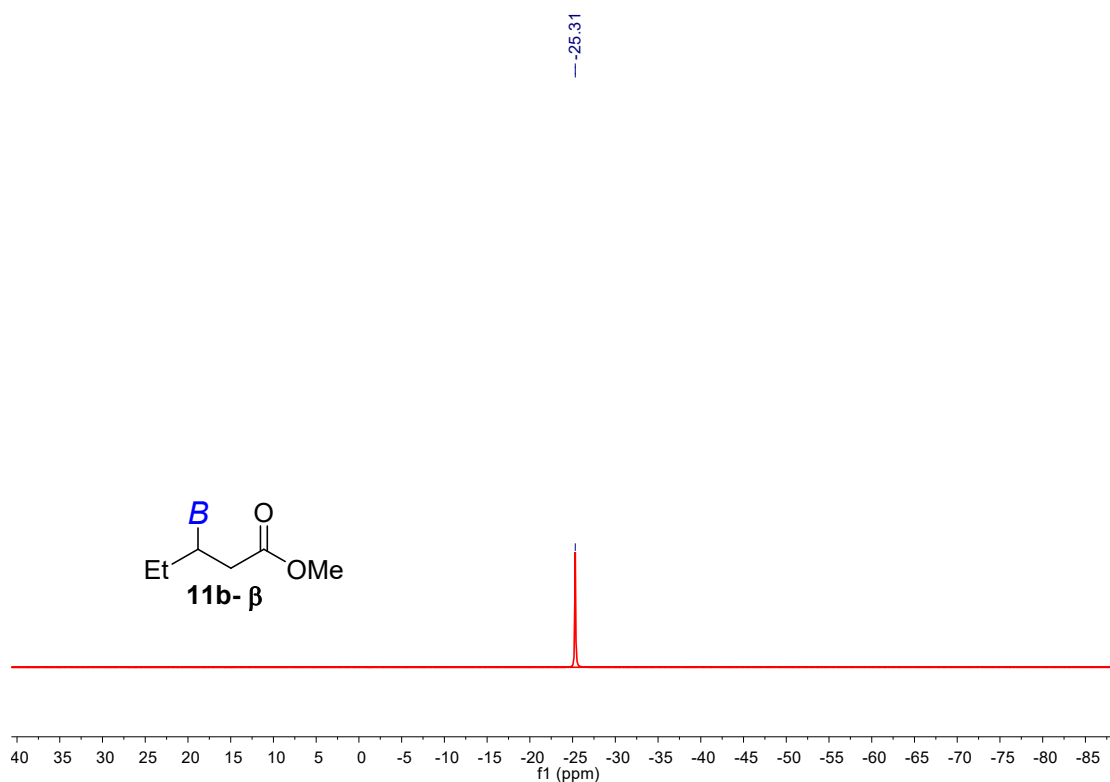

$^{11}\text{B}\{^1\text{H}\}$  NMR (193 MHz,  $\text{CDCl}_3$ )

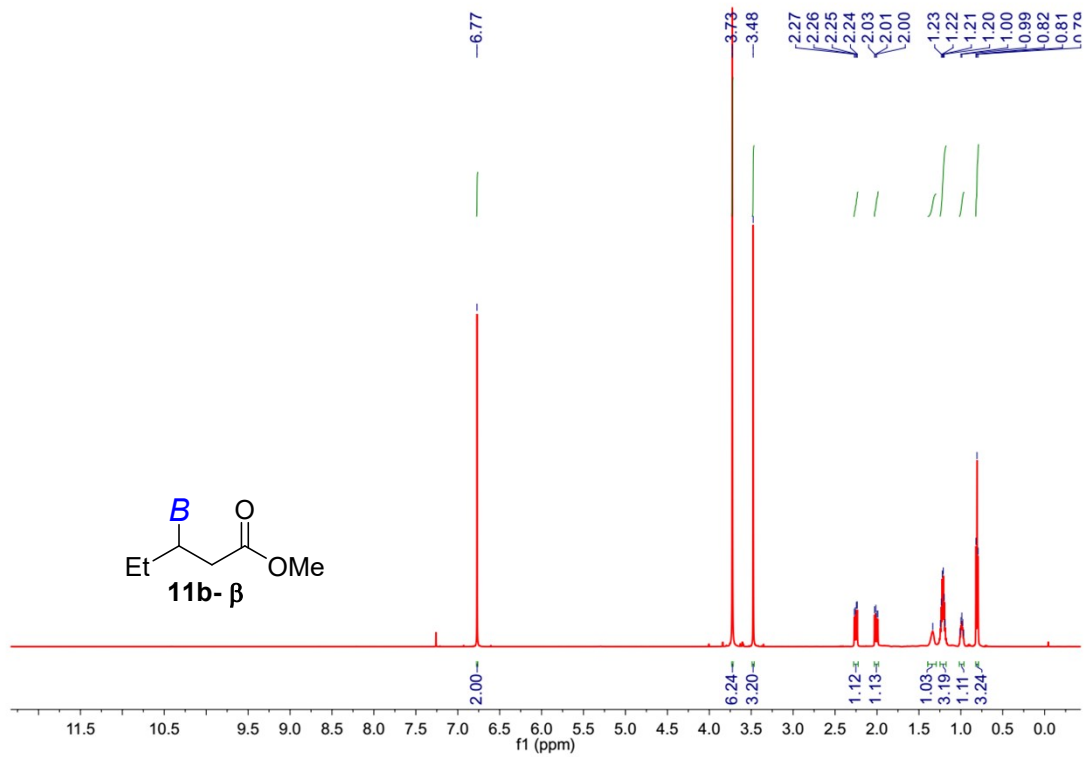

$^1\text{H}\{^{11}\text{B}\}$  NMR (600 MHz,  $\text{CDCl}_3$ )

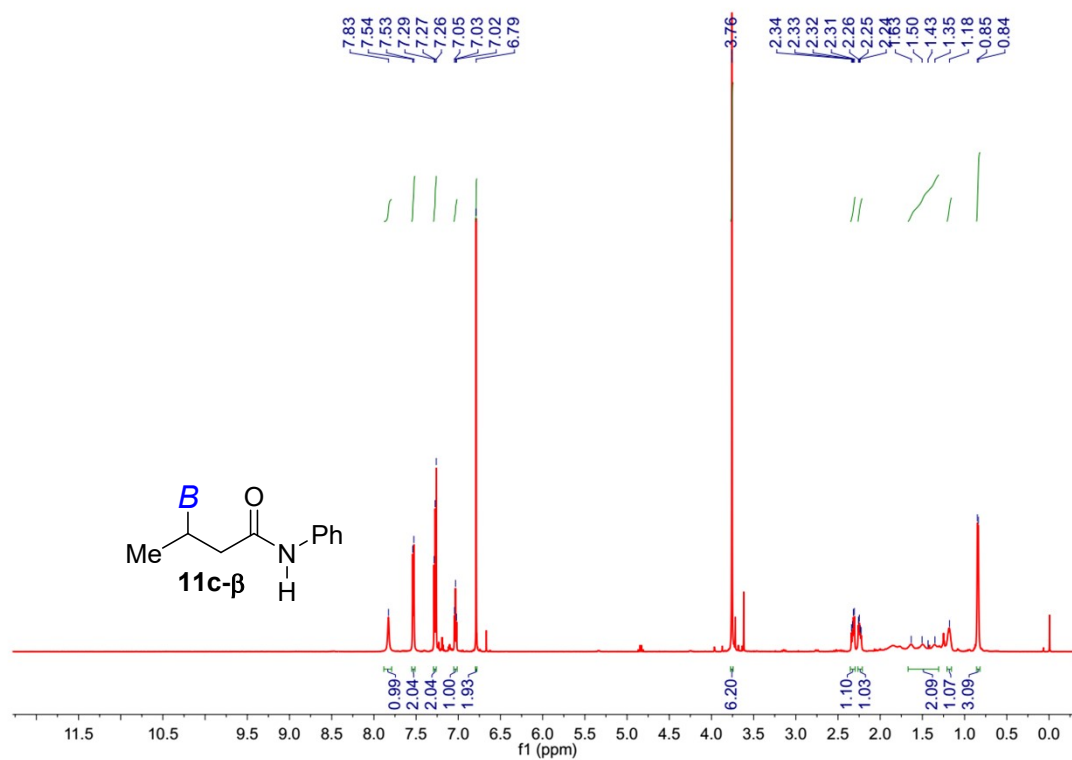

<sup>1</sup>H NMR (600 MHz, CDCl<sub>3</sub>)

— 174.65

— 138.77

— 128.82

— 123.38

— 120.32

— 119.60

— 48.69

— 36.14

— 22.57

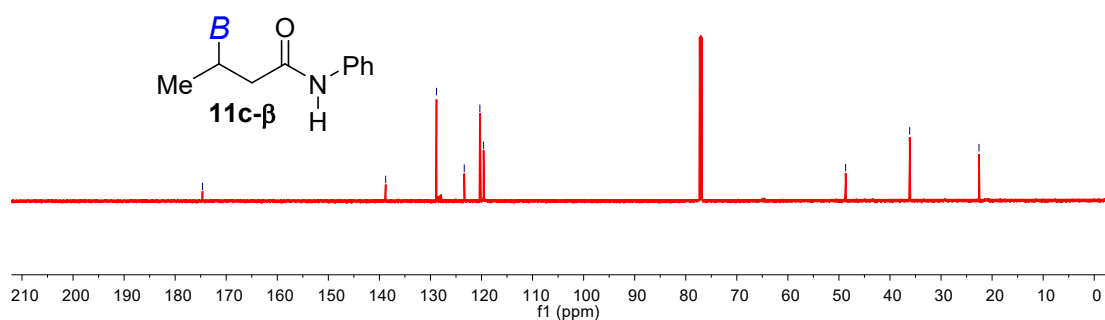

<sup>13</sup>C NMR (151 MHz, CDCl<sub>3</sub>)

-23.59  
-24.03  
-24.46

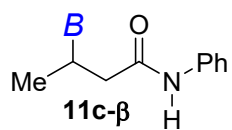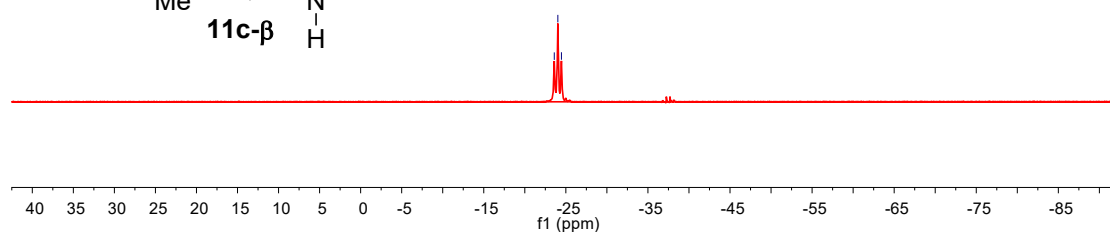

$^{11}\text{B}$  NMR (193 MHz,  $\text{CDCl}_3$ )

-24.03

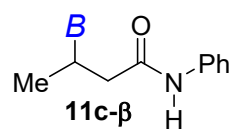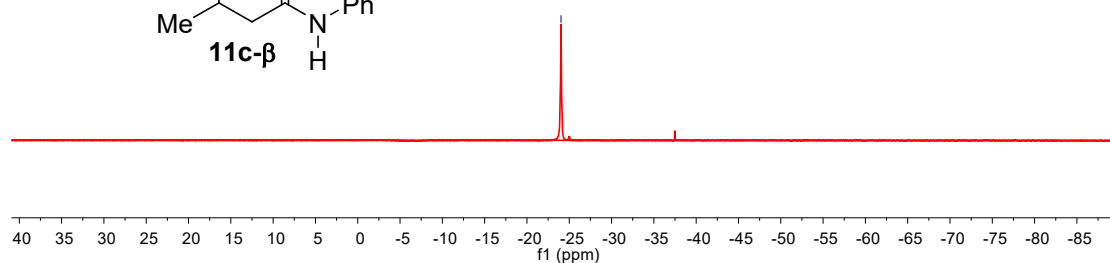

$^{11}\text{B}\{^1\text{H}\}$  NMR (193 MHz,  $\text{CDCl}_3$ )

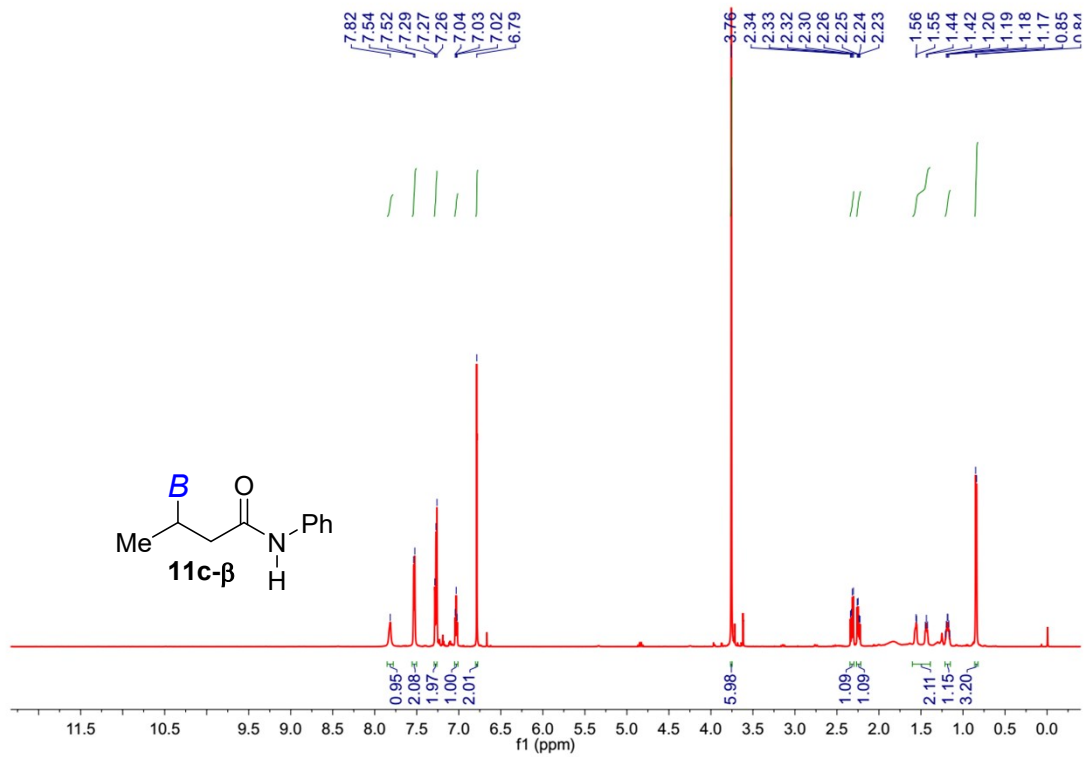

$^1\text{H}\{^{11}\text{B}\}$  NMR (600 MHz,  $\text{CDCl}_3$ )



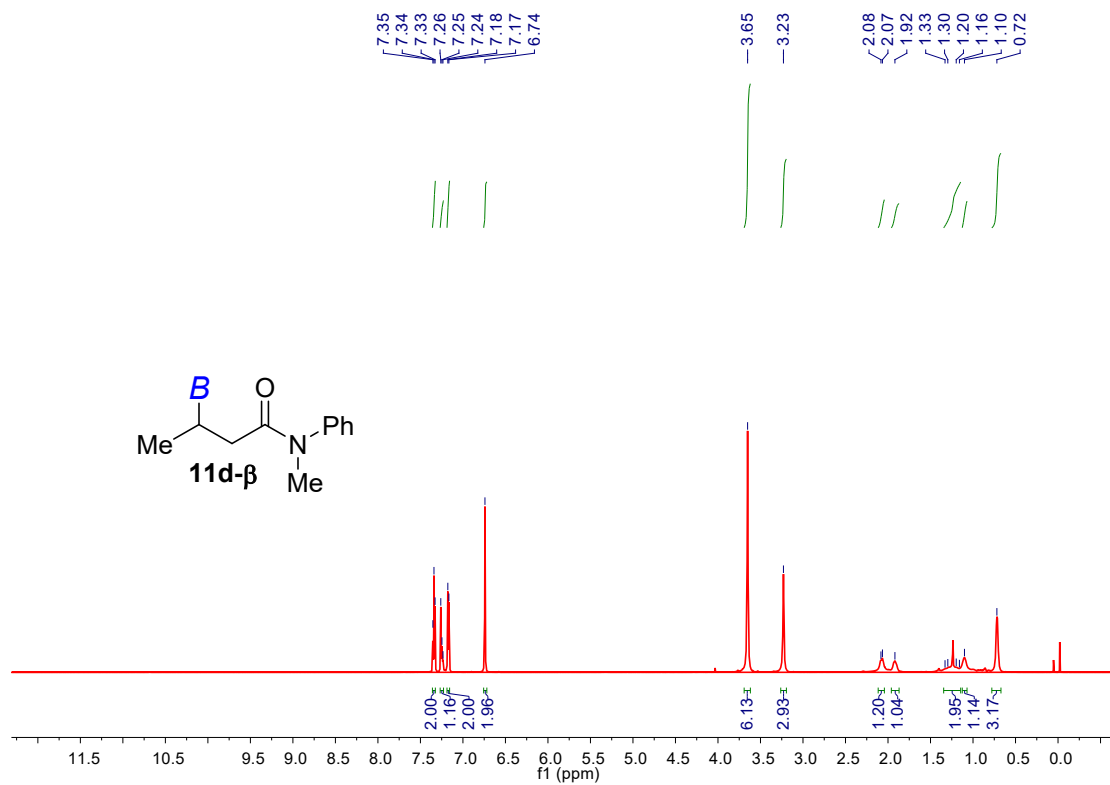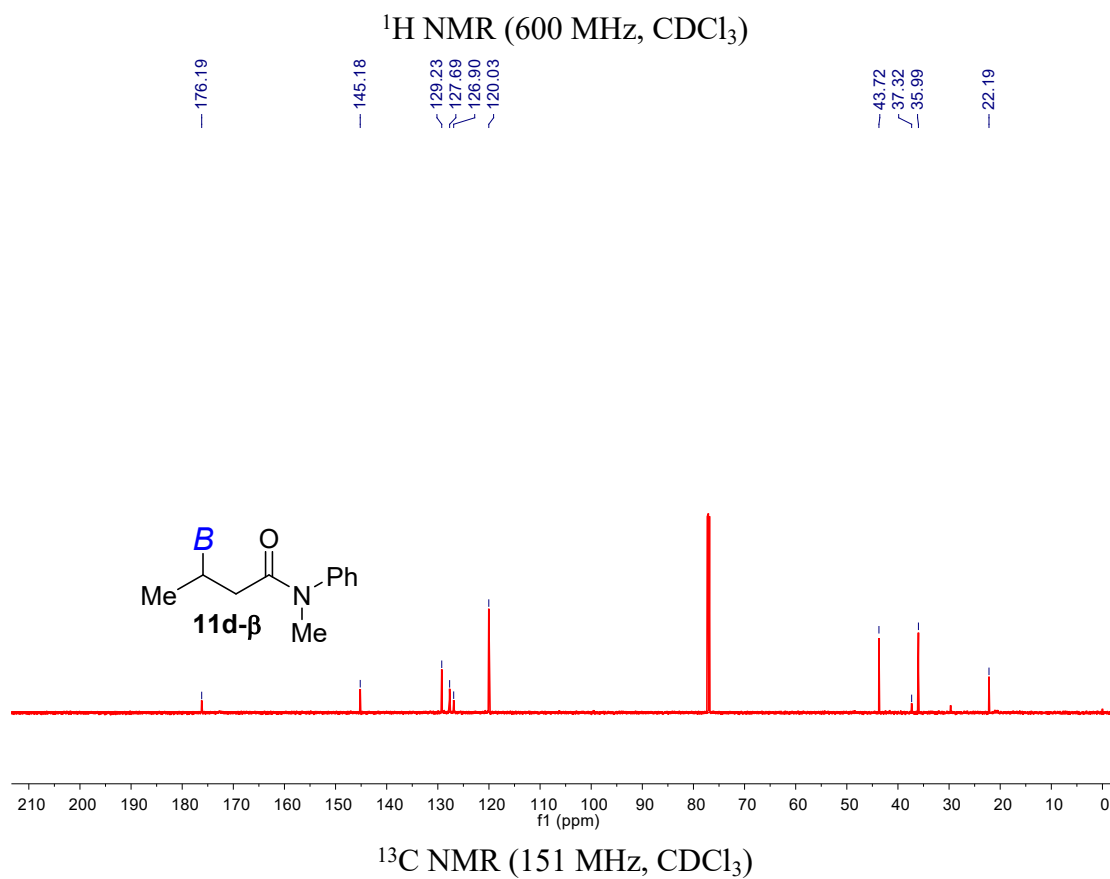

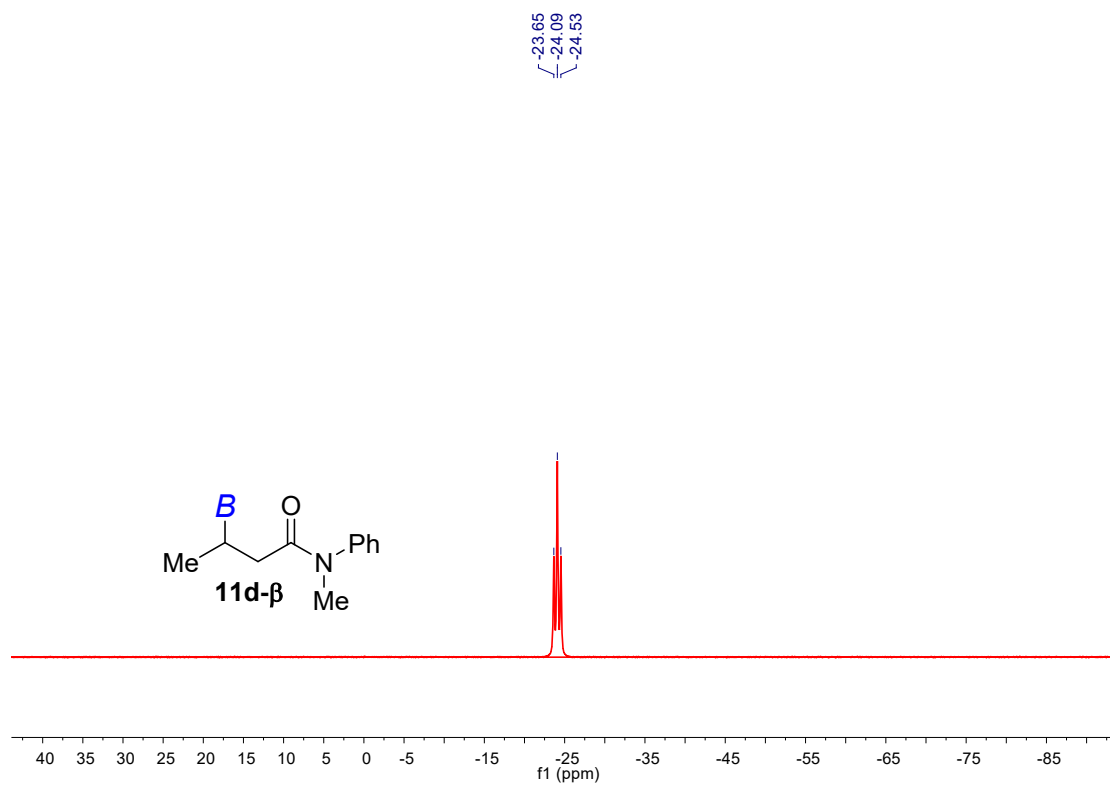

$^{11}\text{B}$  NMR (193 MHz,  $\text{CDCl}_3$ )

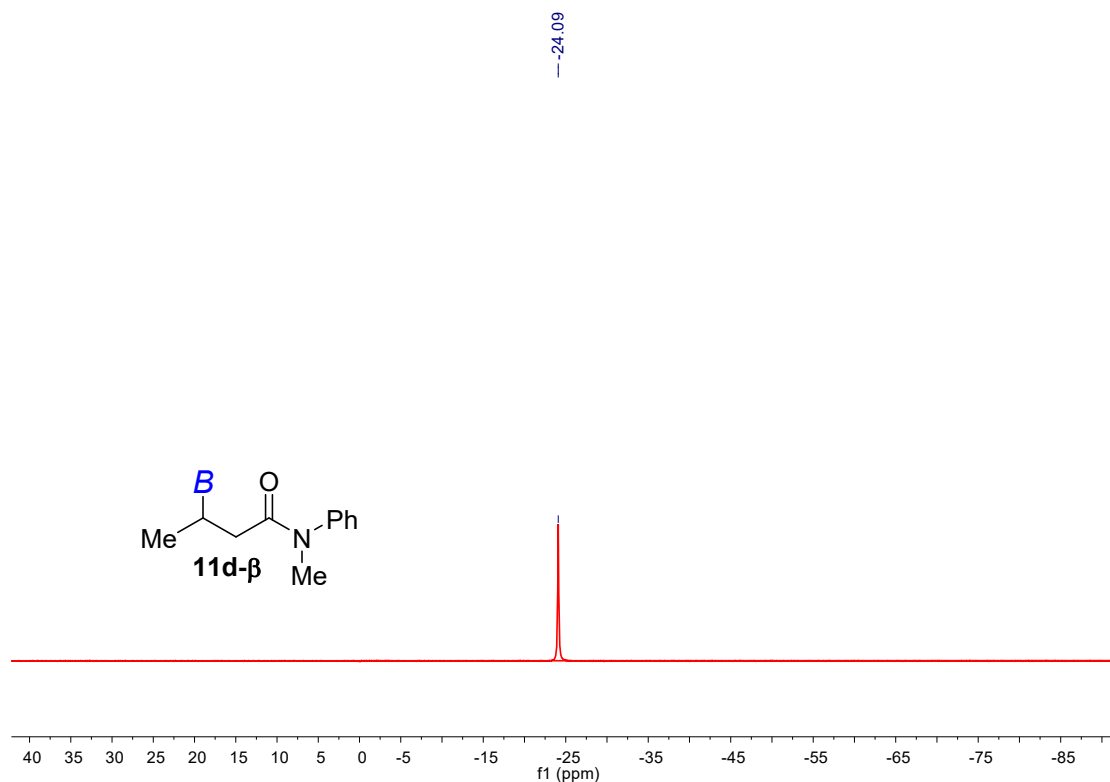

$^{11}\text{B}\{^1\text{H}\}$  NMR (193 MHz,  $\text{CDCl}_3$ )

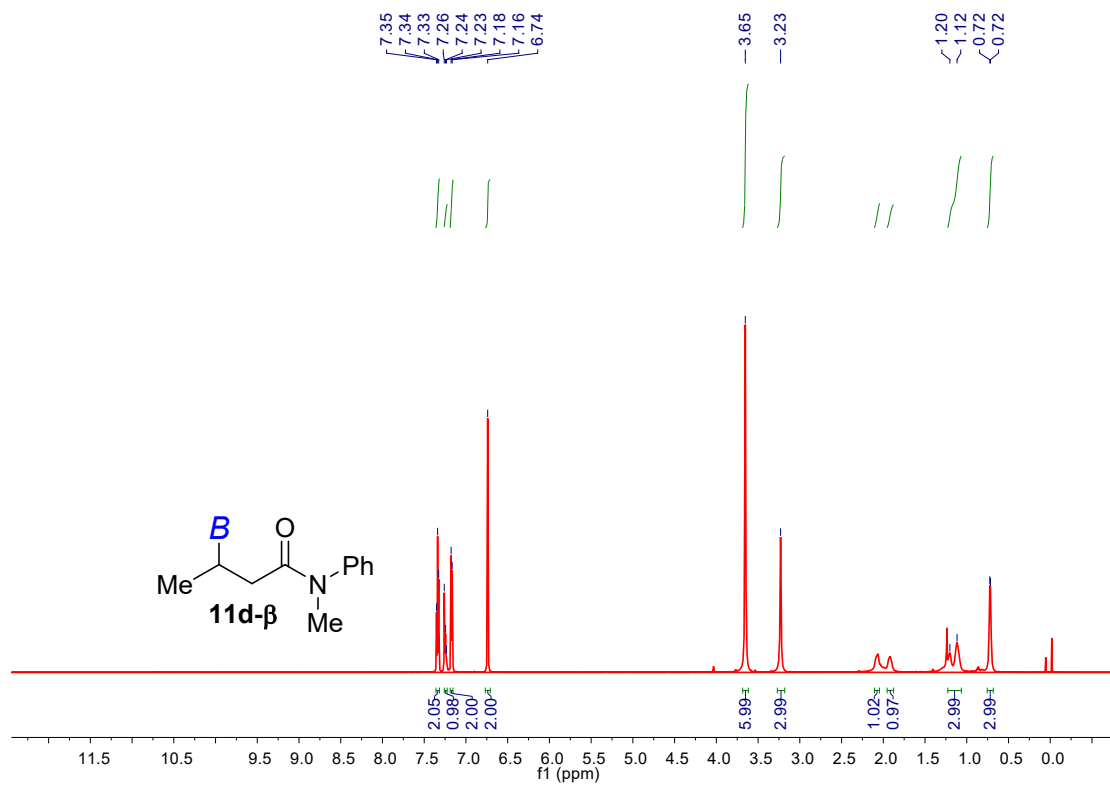

<sup>1</sup>H{<sup>11</sup>B} NMR (600 MHz, CDCl<sub>3</sub>)

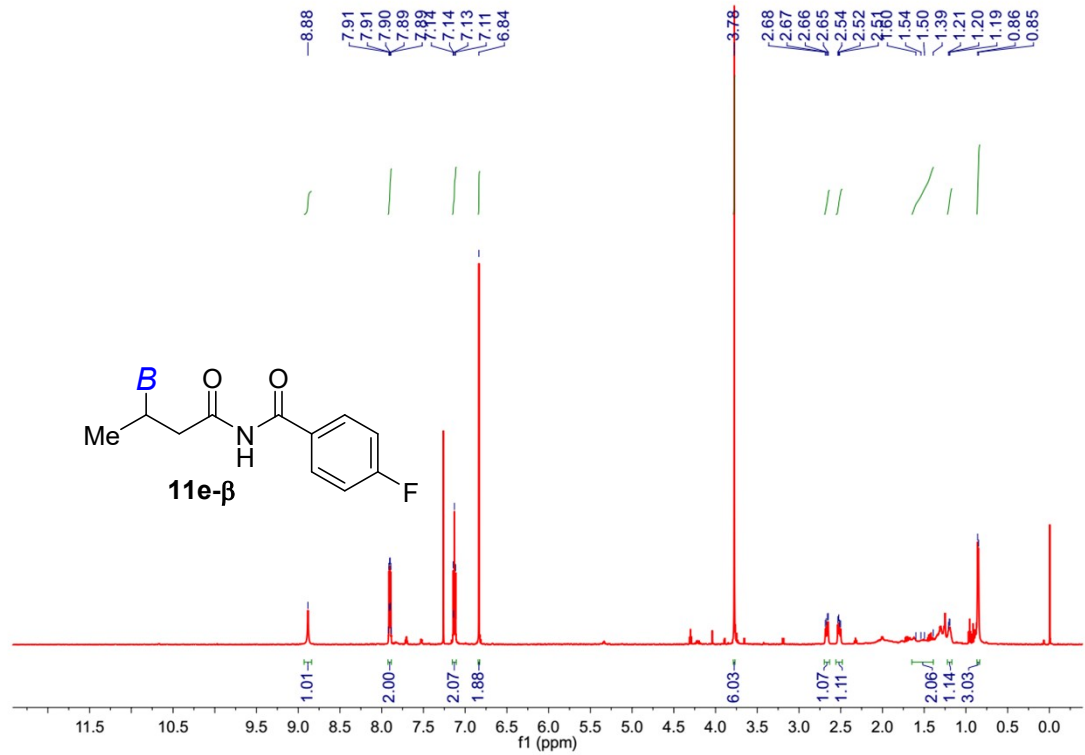

<sup>1</sup>H NMR (600 MHz, CDCl<sub>3</sub>)

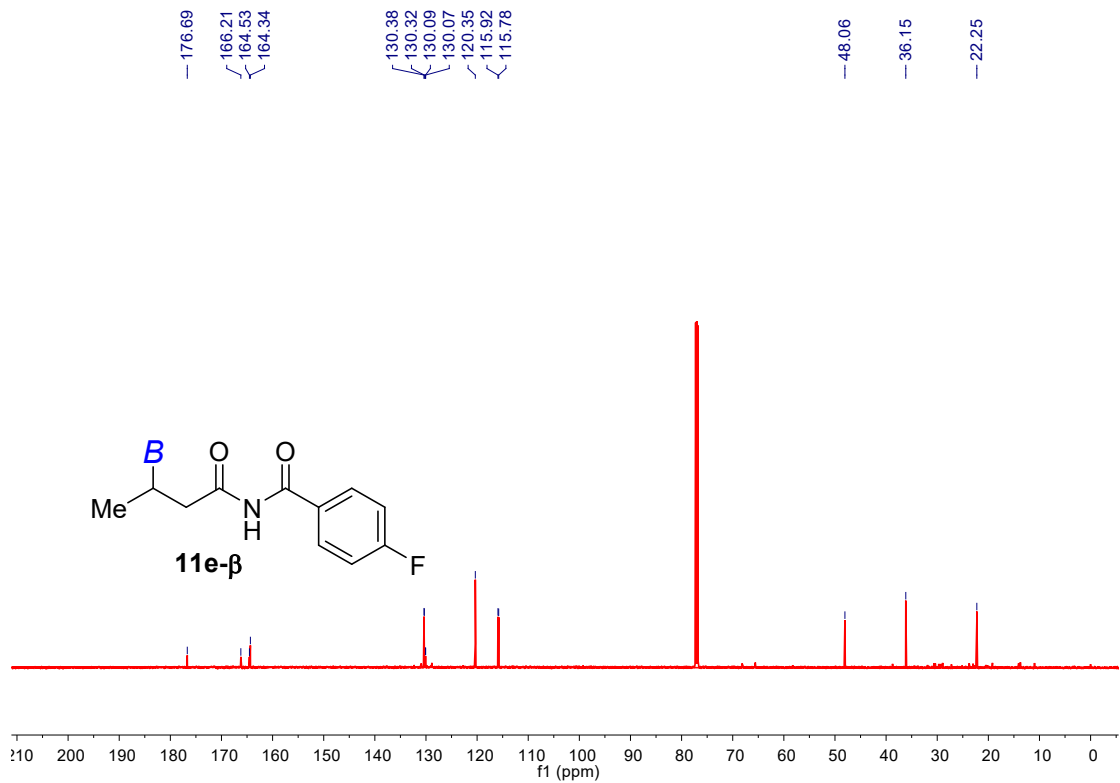

<sup>13</sup>C NMR (151 MHz, CDCl<sub>3</sub>)

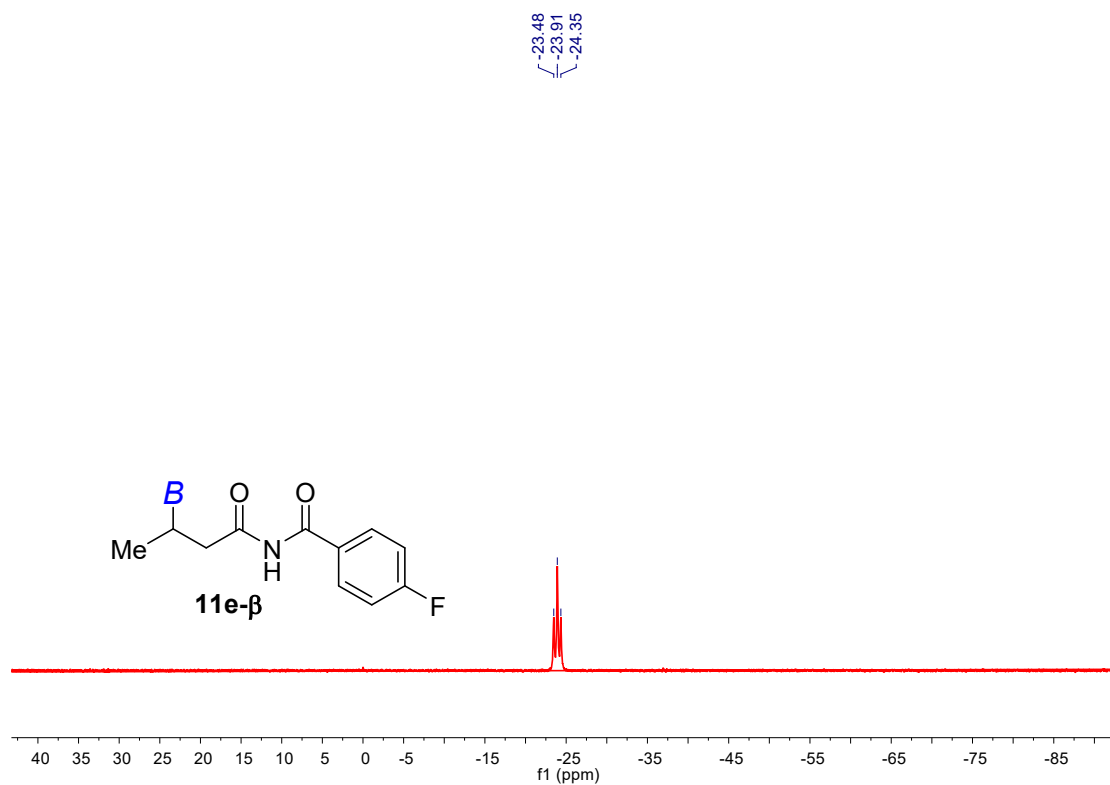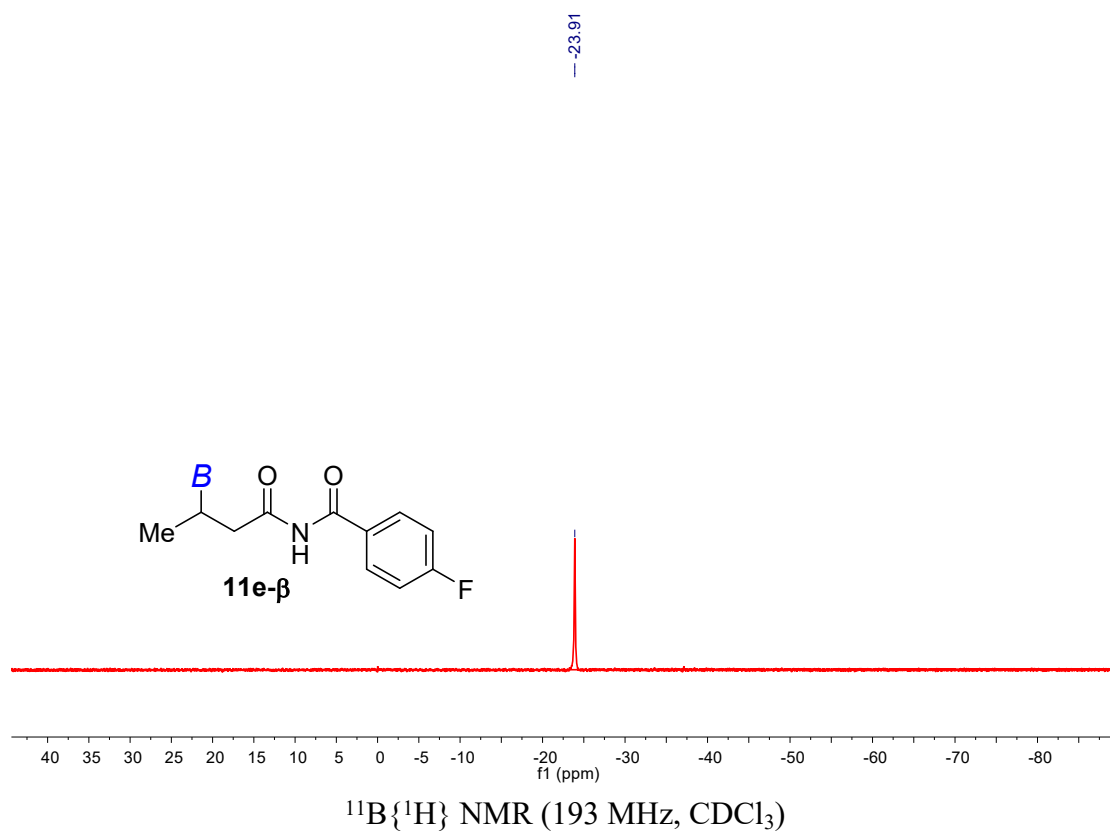

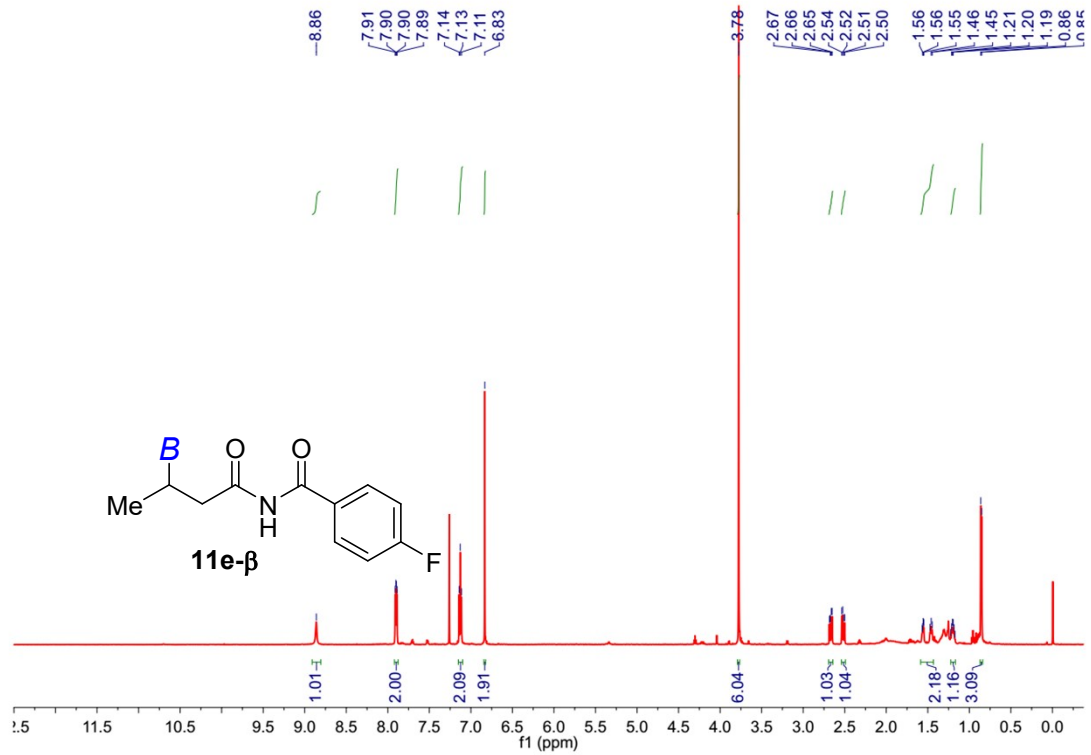

**<sup>1</sup>H{<sup>1</sup>B} NMR (600 MHz, CDCl<sub>3</sub>)**

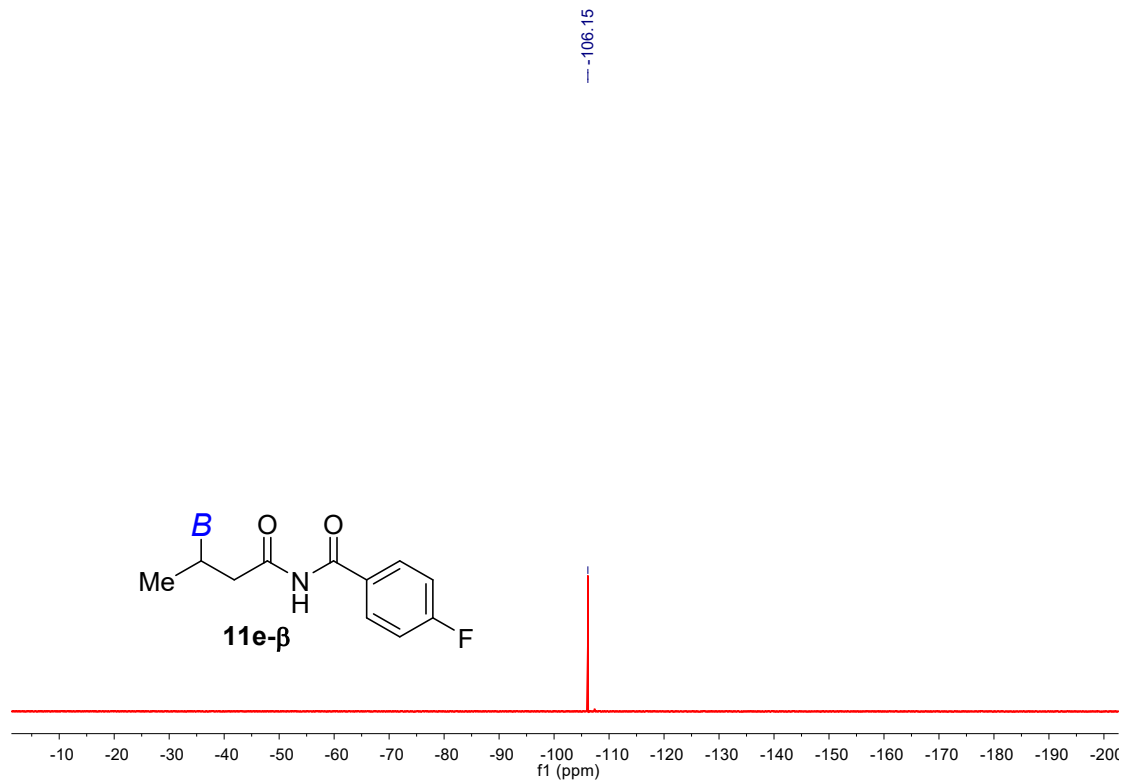

**<sup>19</sup>F NMR (565 MHz, CDCl<sub>3</sub>)**

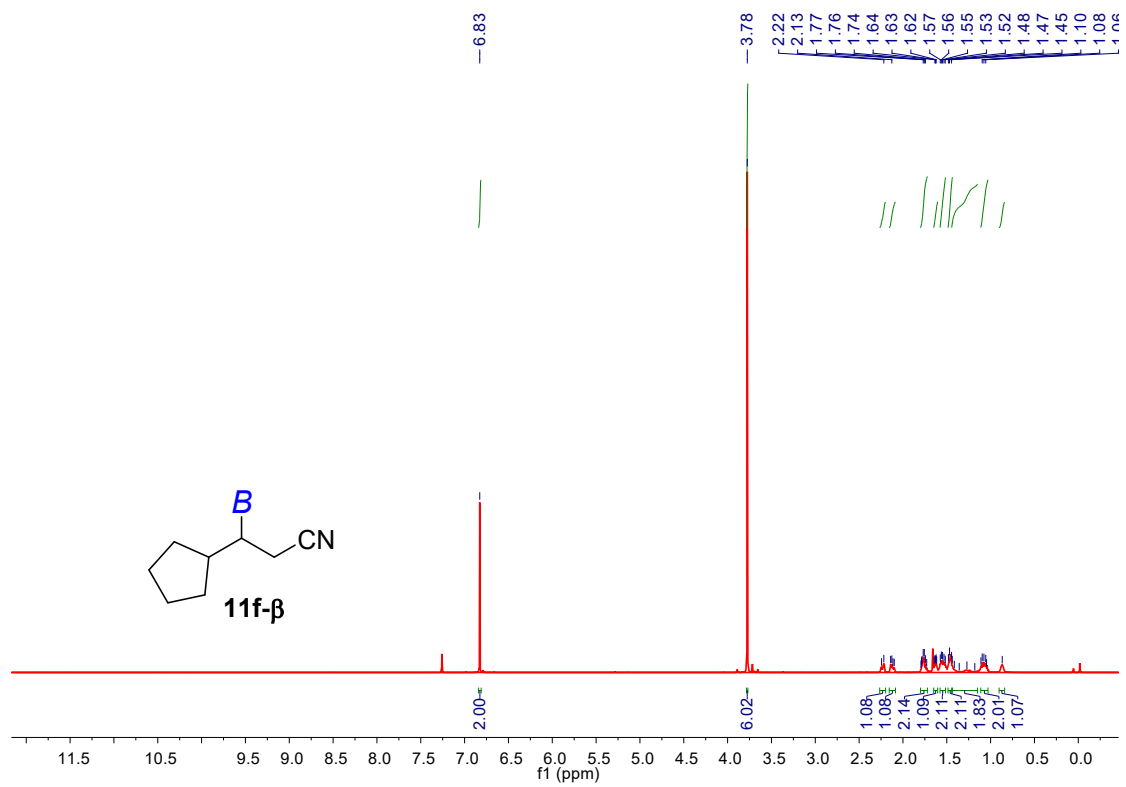

<sup>1</sup>H NMR (600 MHz, CDCl<sub>3</sub>)

122.67  
120.50

46.98  
36.10  
32.07  
31.68  
25.48  
25.43  
23.33

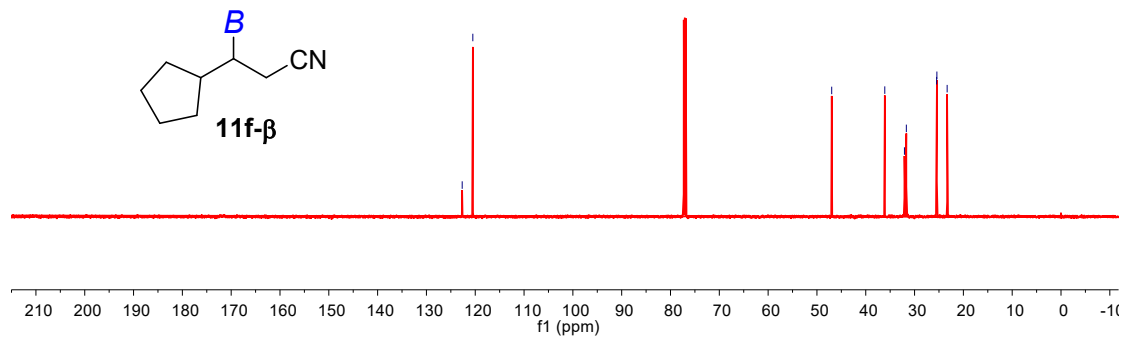

<sup>13</sup>C NMR (151 MHz, CDCl<sub>3</sub>)

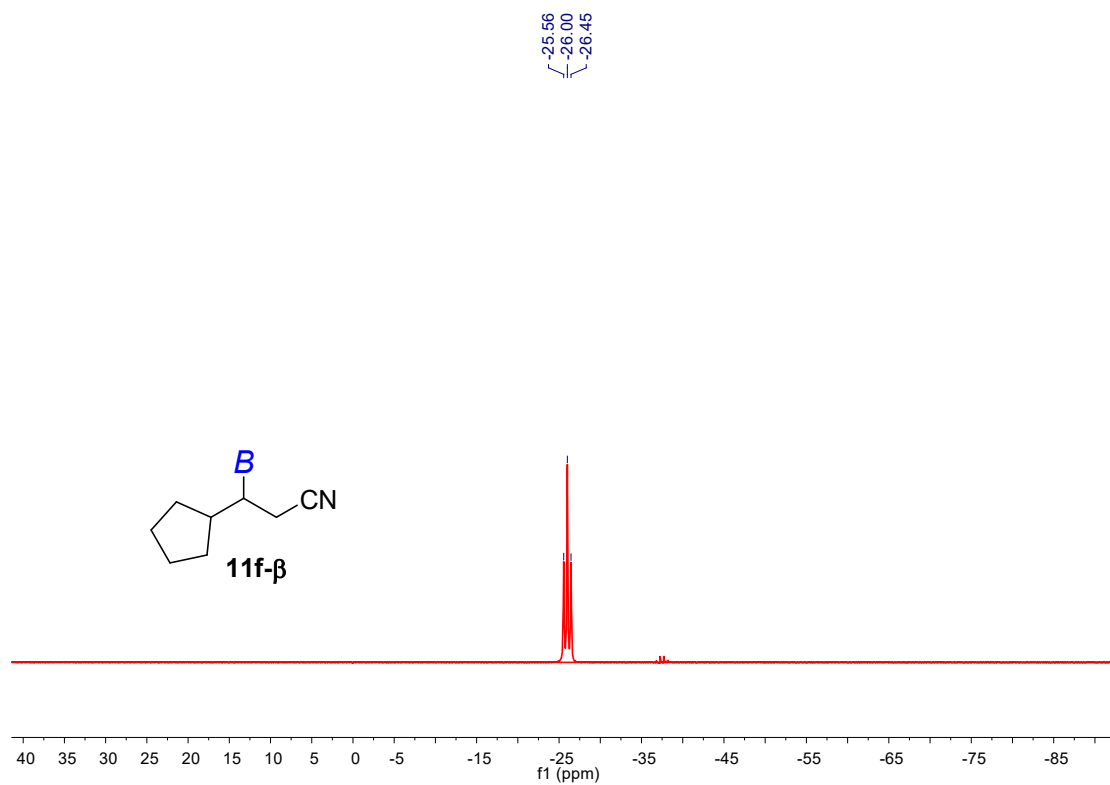

$^{11}\text{B}$  NMR (193 MHz,  $\text{CDCl}_3$ )

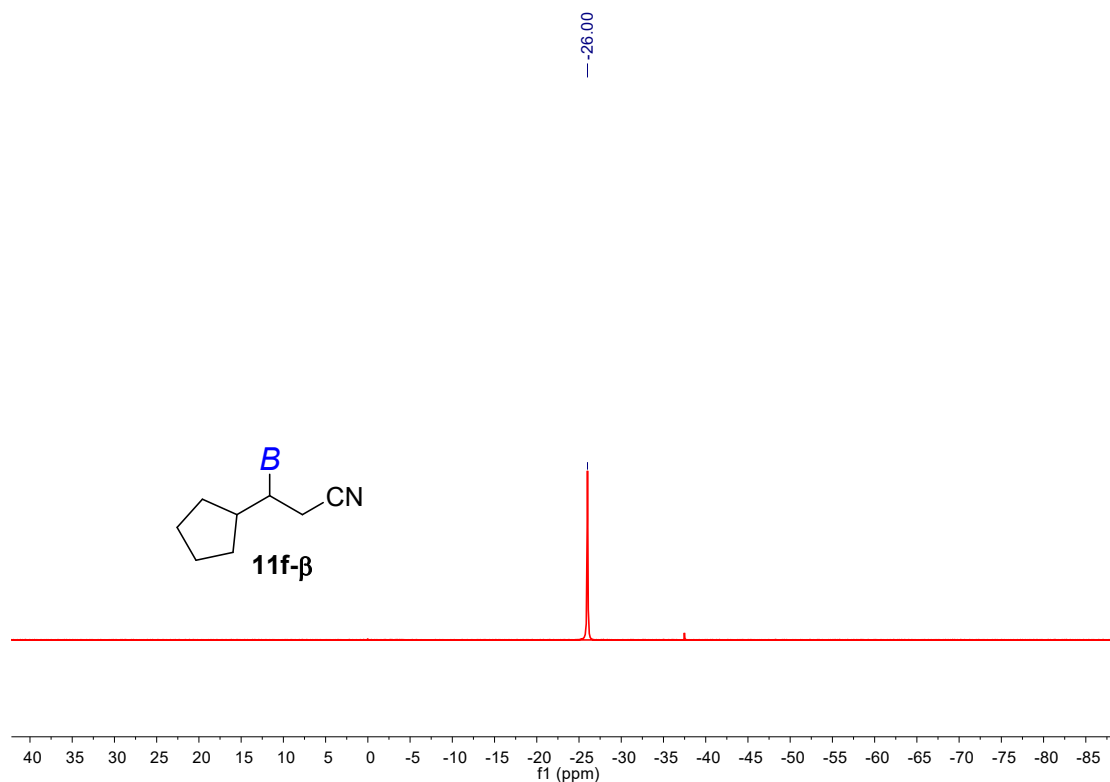

$^{11}\text{B}\{^1\text{H}\}$  NMR (193 MHz,  $\text{CDCl}_3$ )



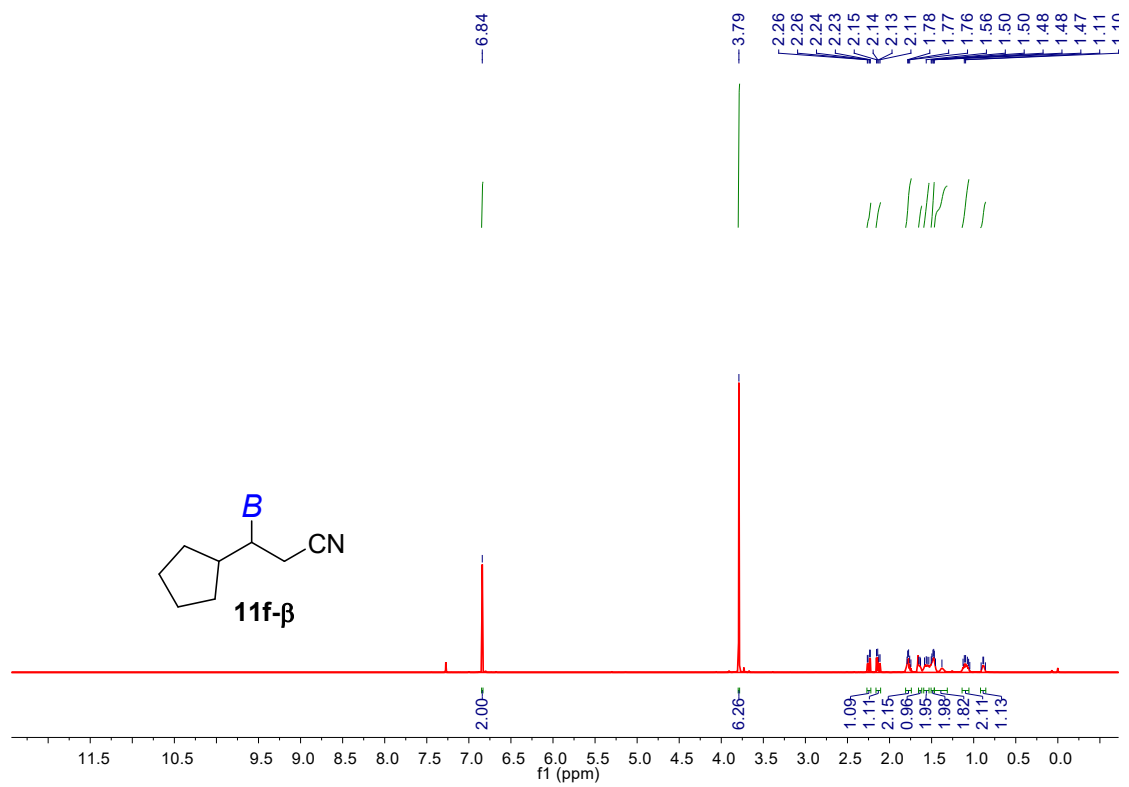

<sup>1</sup>H{<sup>11</sup>B} NMR (600 MHz, CDCl<sub>3</sub>)

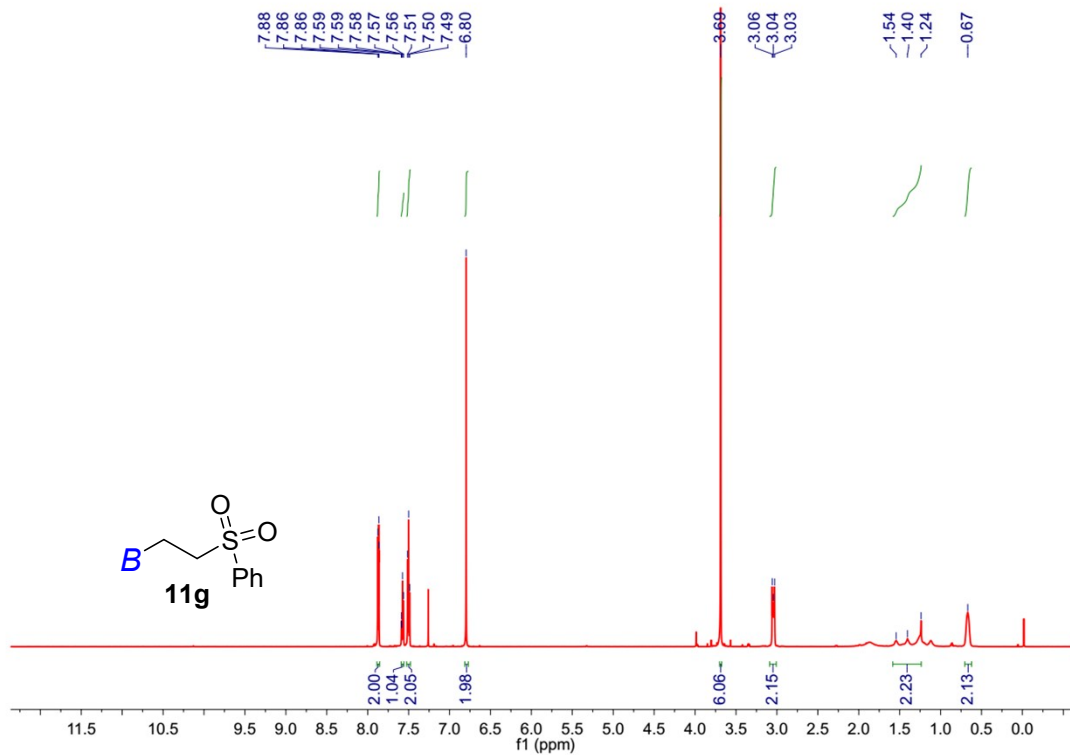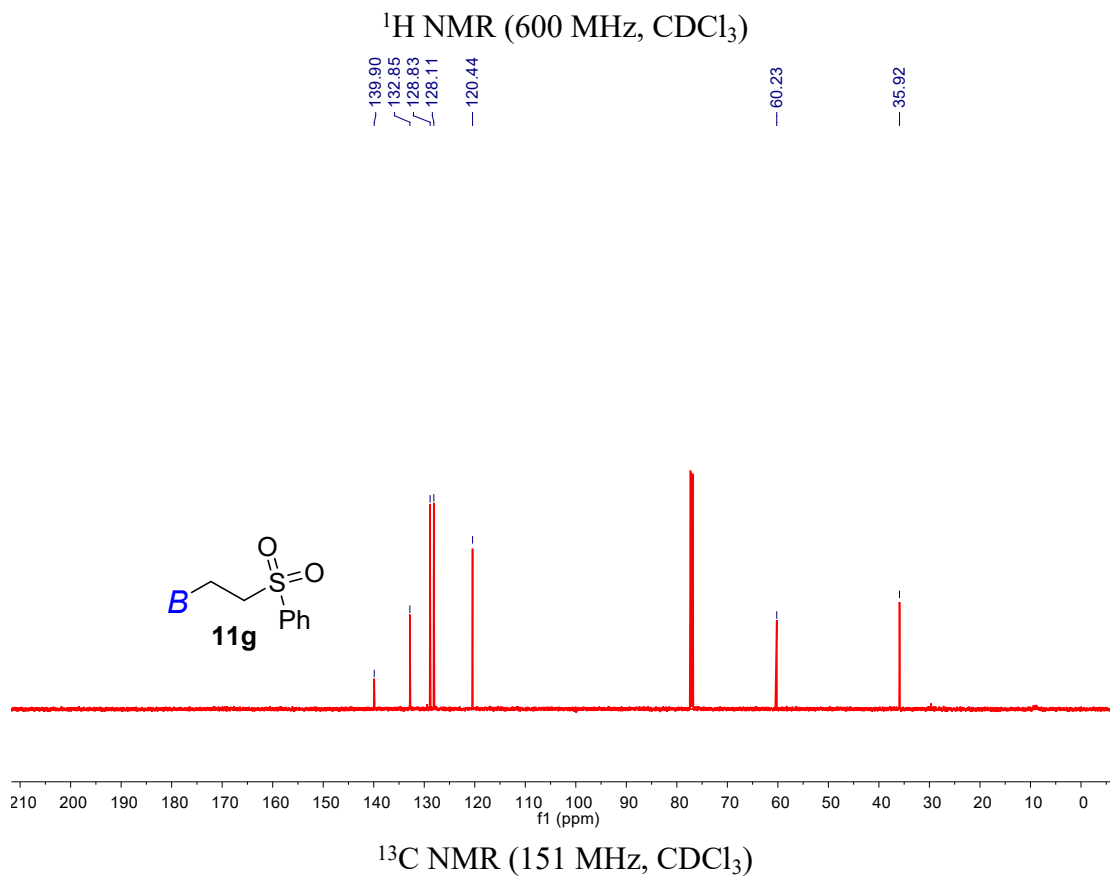

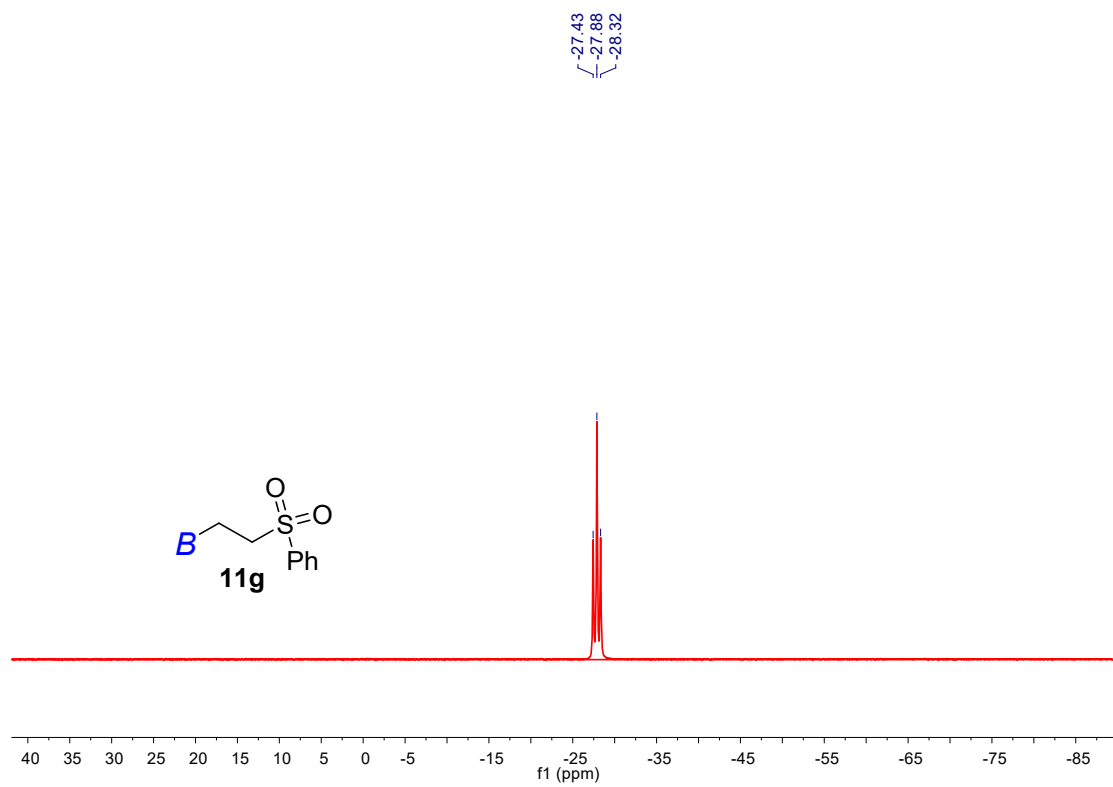

$^{11}\text{B}$  NMR (193 MHz,  $\text{CDCl}_3$ )

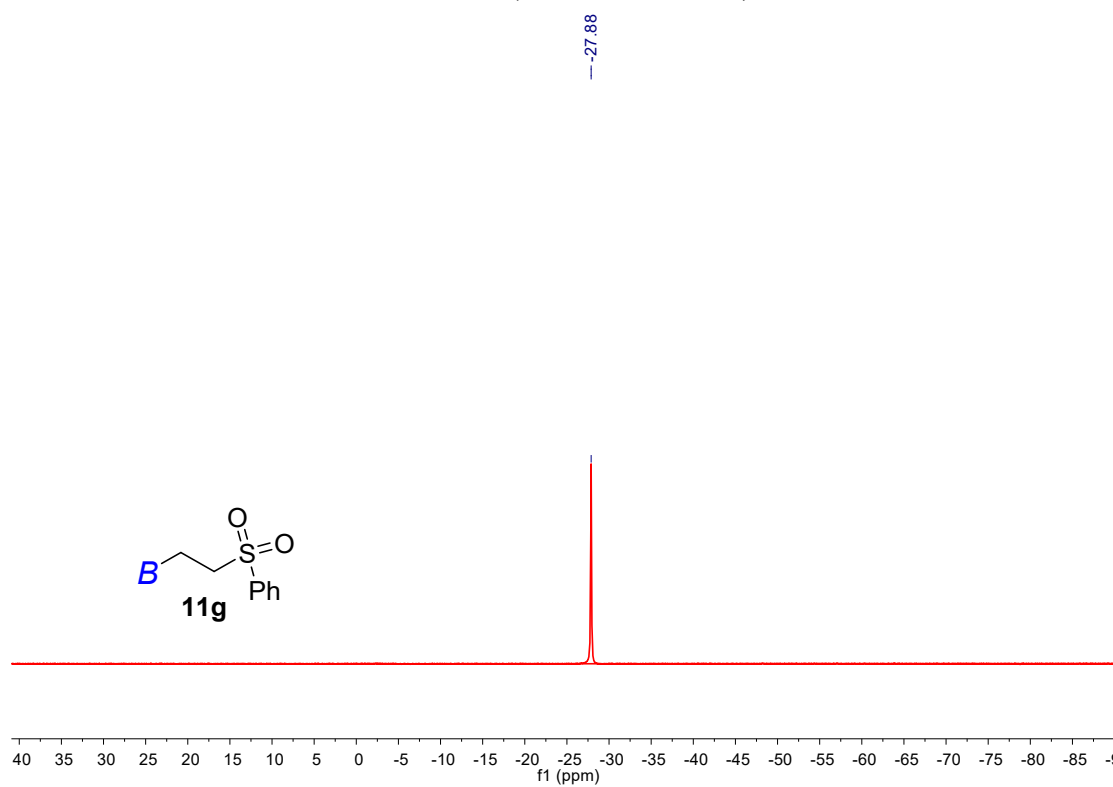

$^{11}\text{B}\{^1\text{H}\}$  NMR (193 MHz,  $\text{CDCl}_3$ )

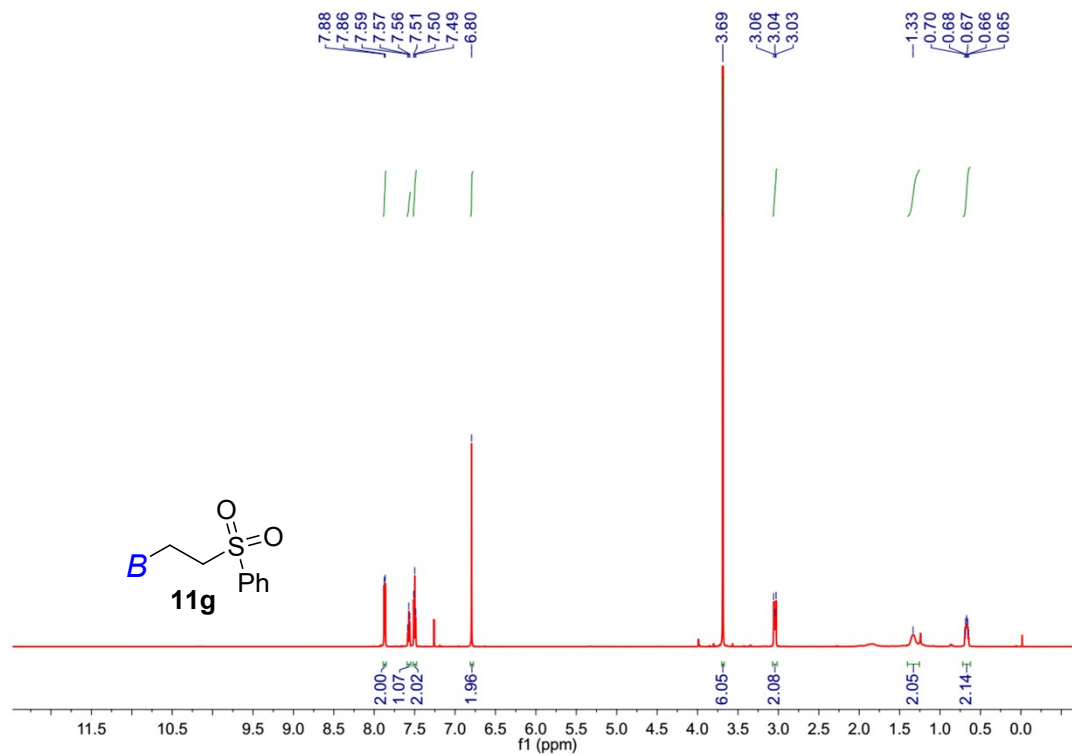

$^1\text{H}\{^{11}\text{B}\}$  NMR (600 MHz,  $\text{CDCl}_3$ )

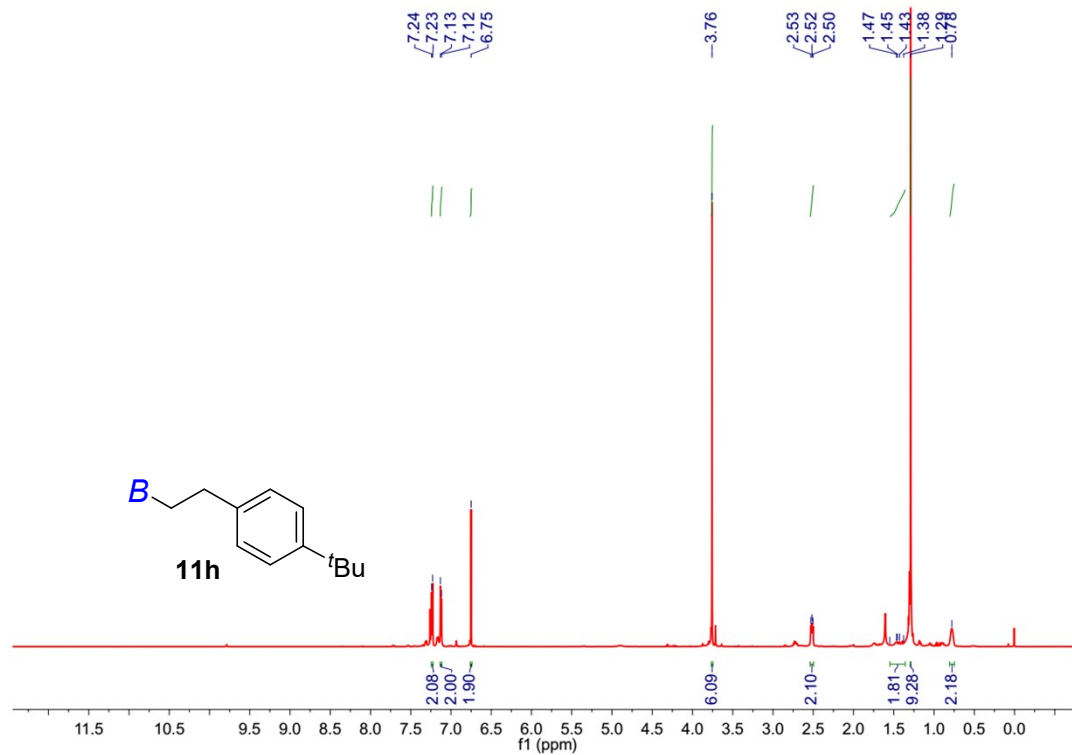

$^1\text{H}$  NMR (600 MHz,  $\text{CDCl}_3$ )

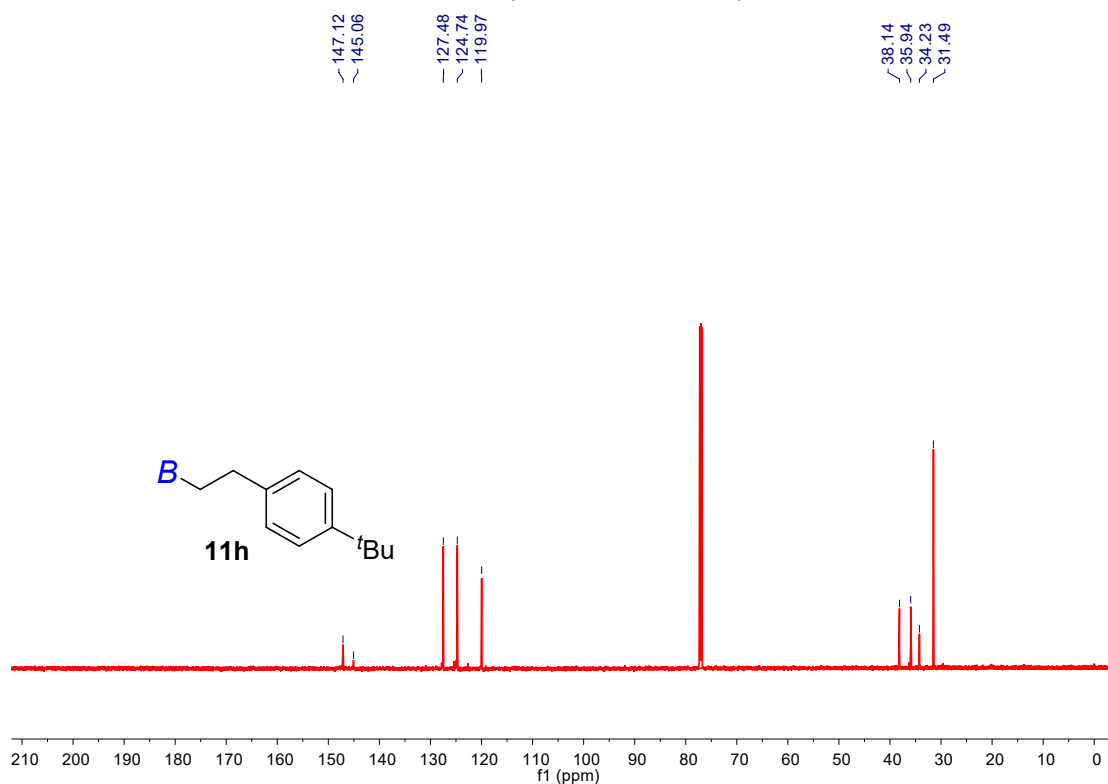

$^{13}\text{C}$  NMR (151 MHz,  $\text{CDCl}_3$ )

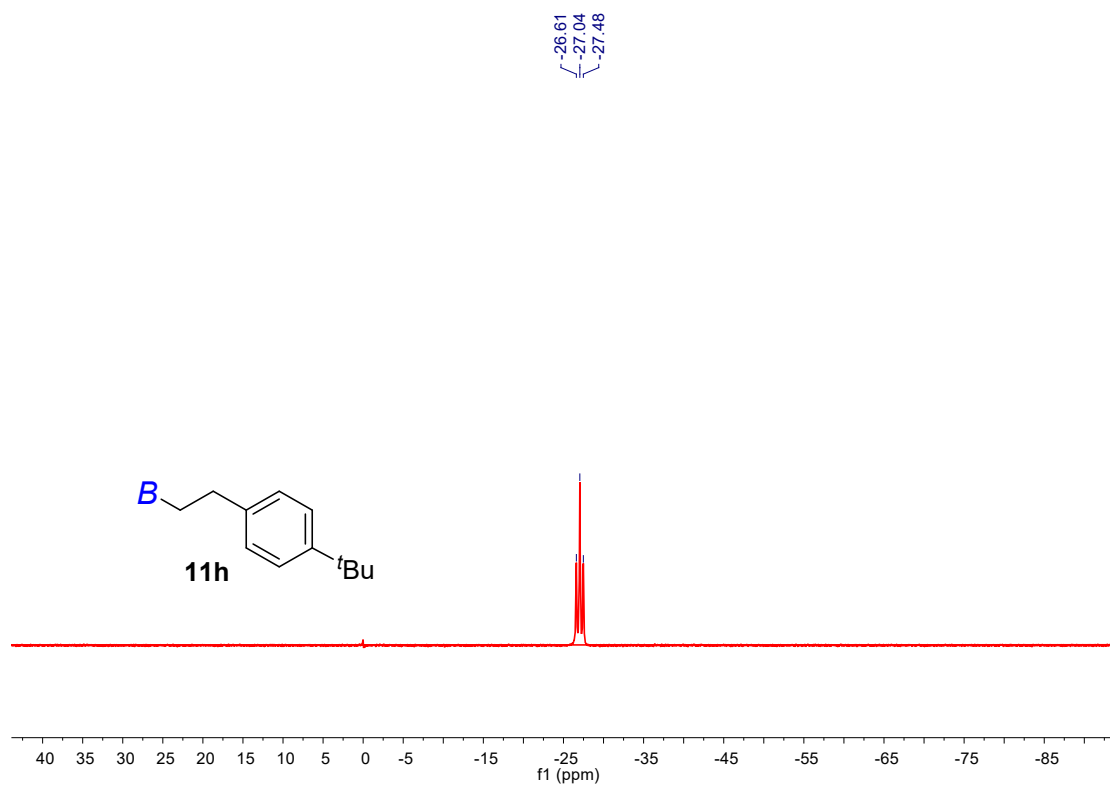

$^{11}\text{B}$  NMR (193 MHz,  $\text{CDCl}_3$ )

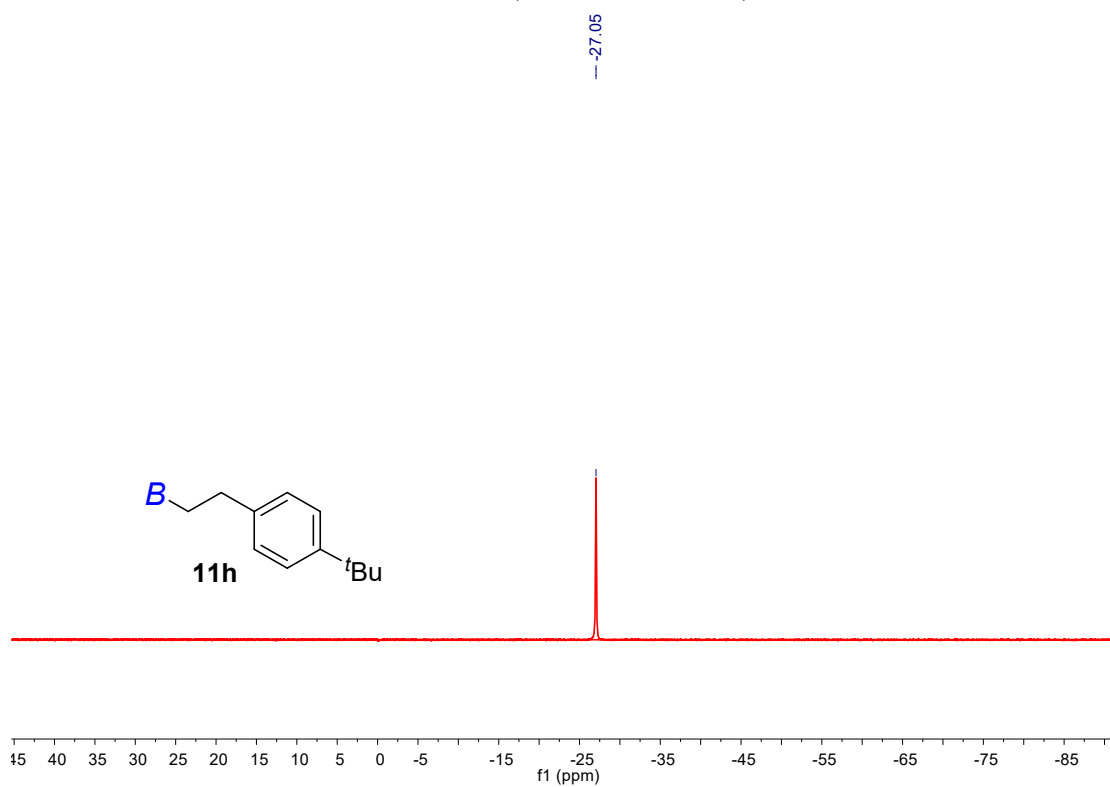

$^{11}\text{B}\{^1\text{H}\}$  NMR (193 MHz,  $\text{CDCl}_3$ )

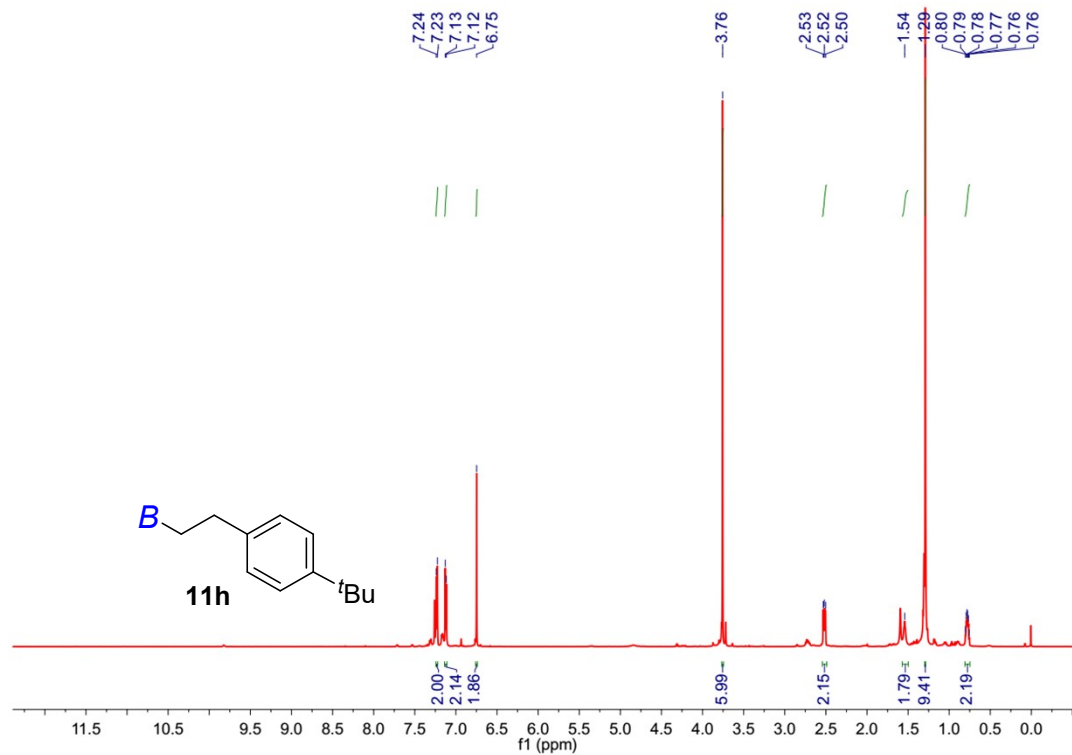

$^1\text{H}\{^{11}\text{B}\}$  NMR (600 MHz,  $\text{CDCl}_3$ )

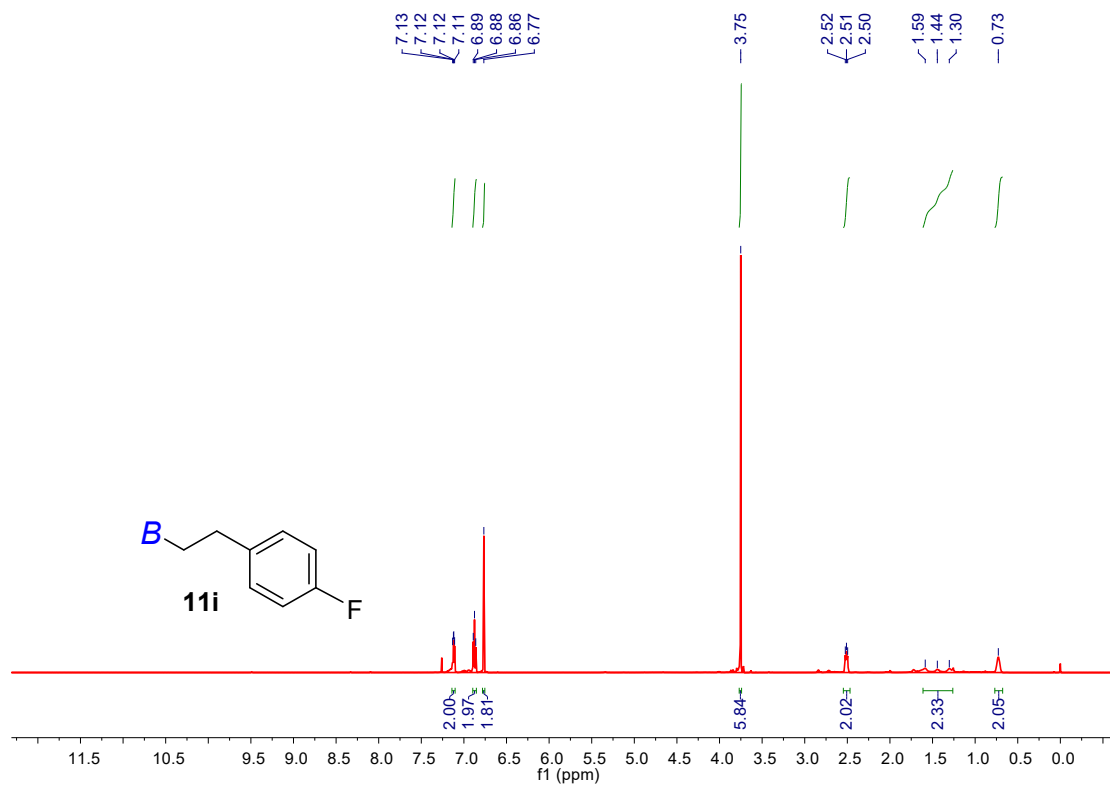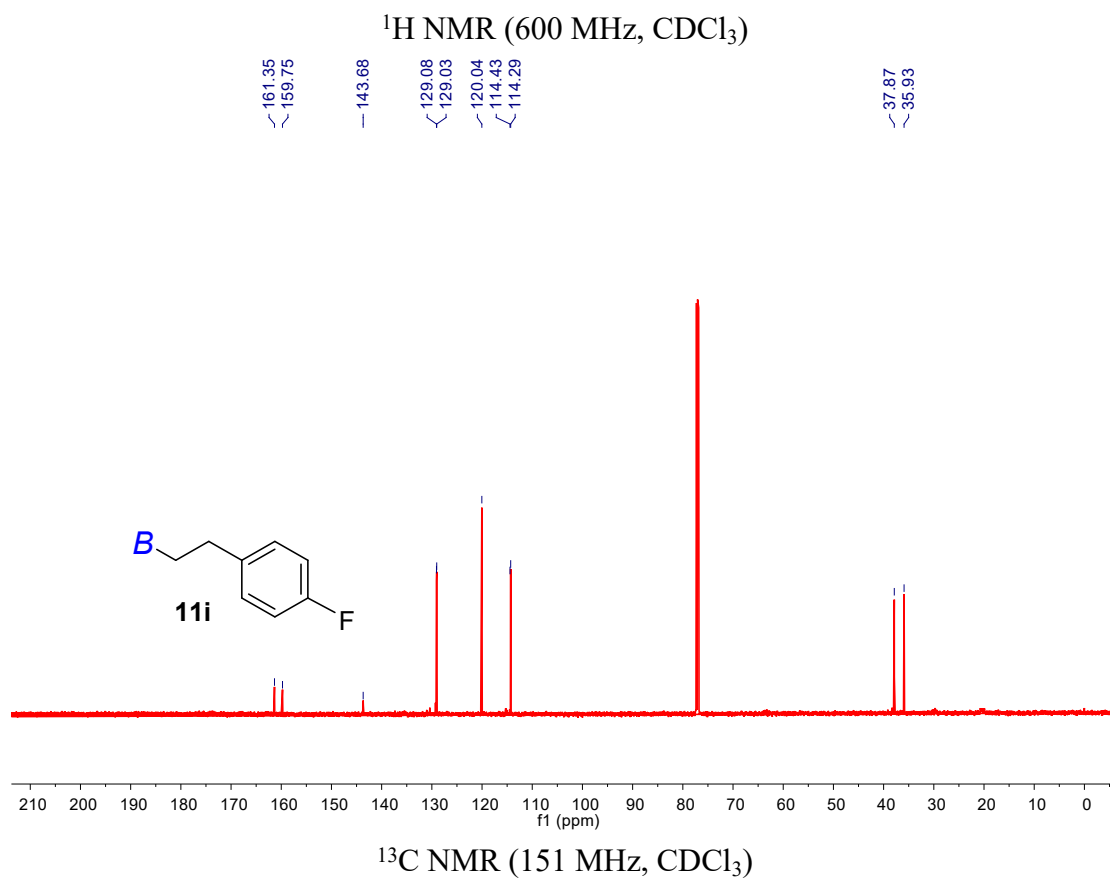



-26.73  
-27.16  
-27.60

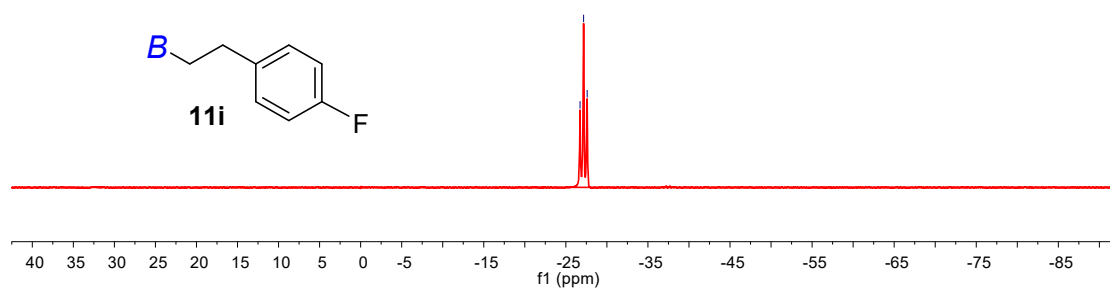

$^{11}\text{B}$  NMR (193 MHz,  $\text{CDCl}_3$ )

-27.17

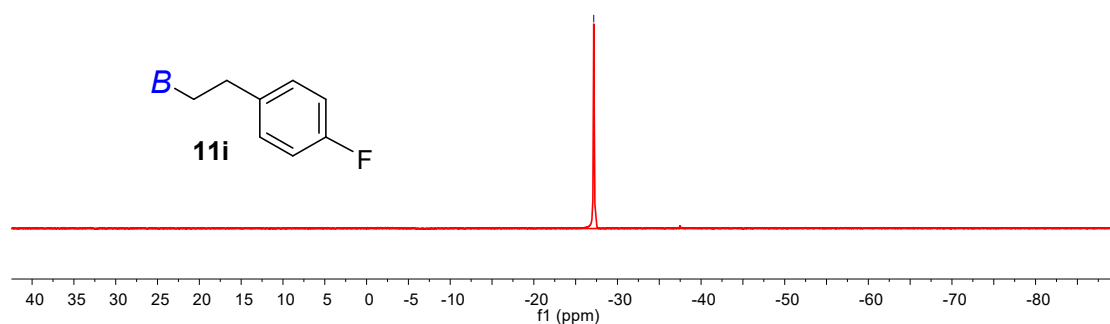

$^{11}\text{B}\{^1\text{H}\}$  NMR (193 MHz,  $\text{CDCl}_3$ )

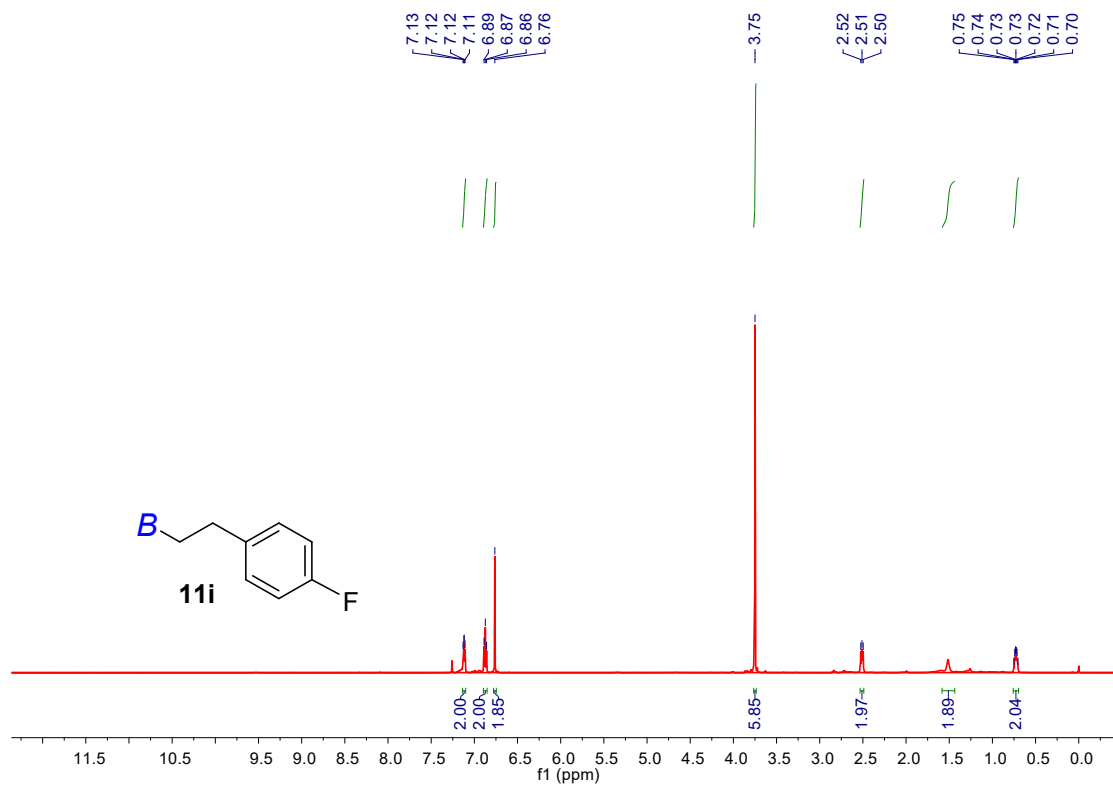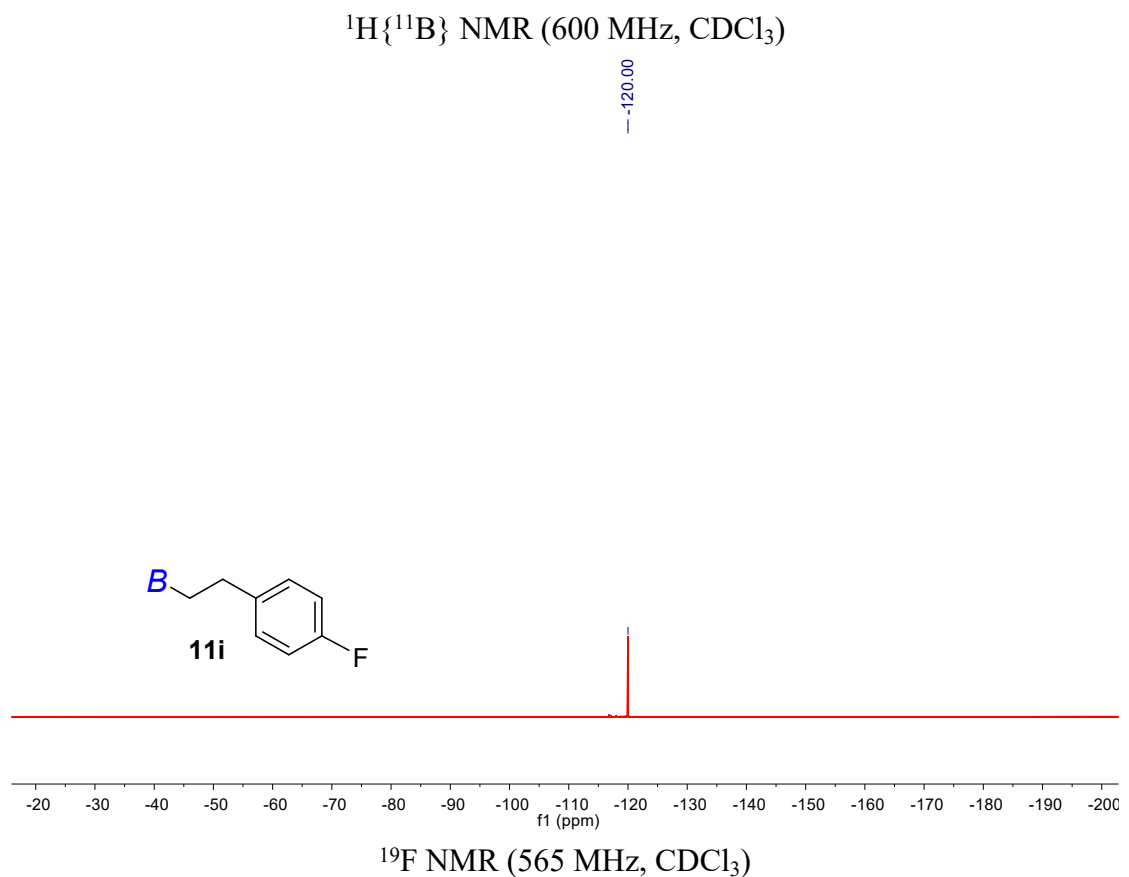

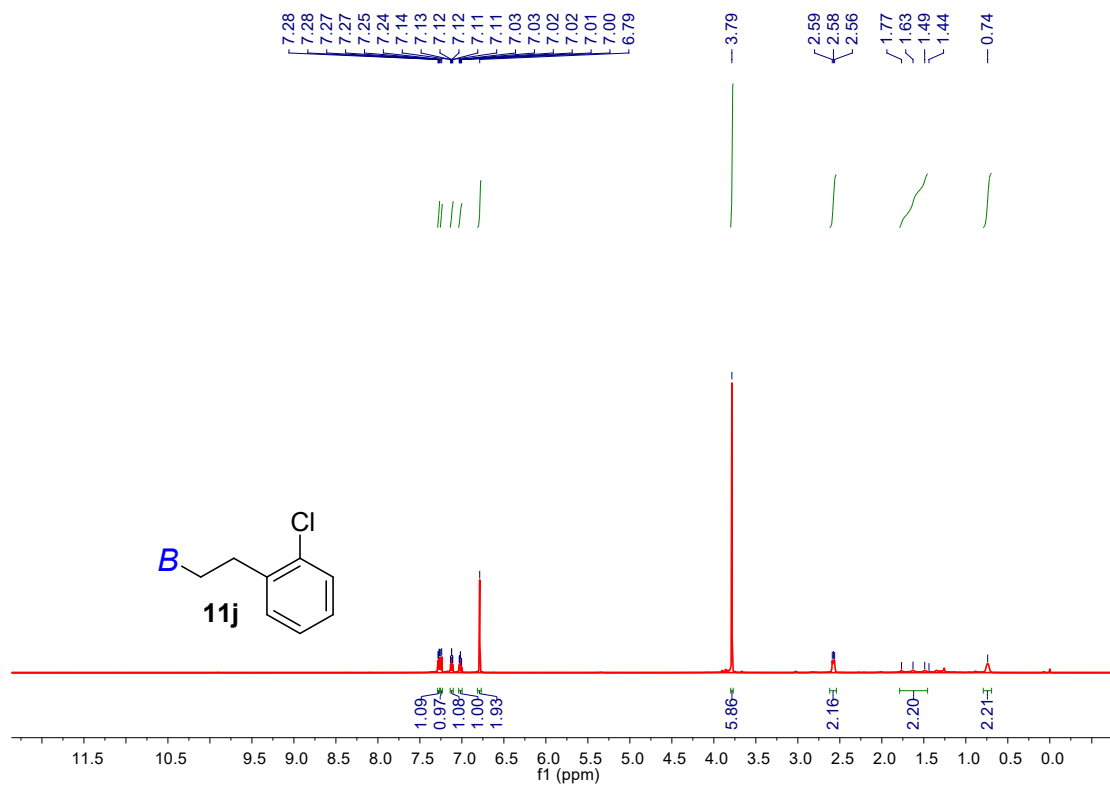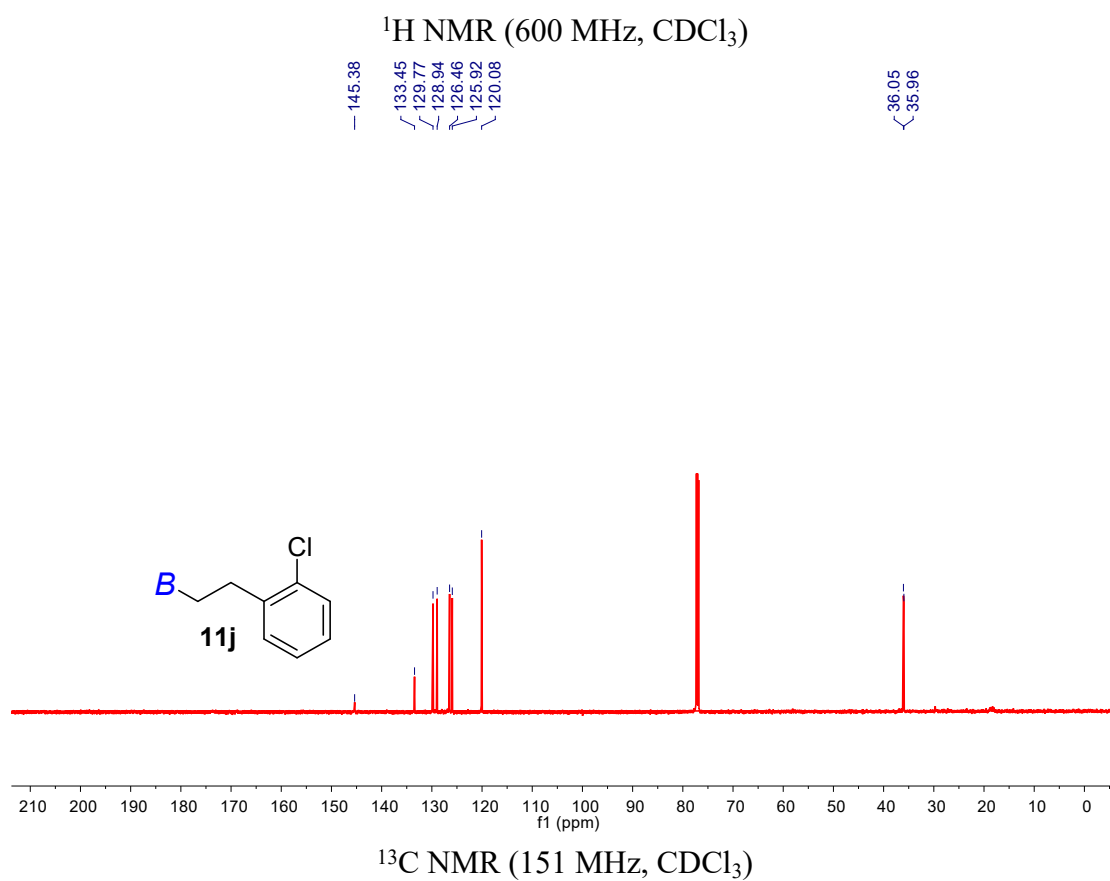

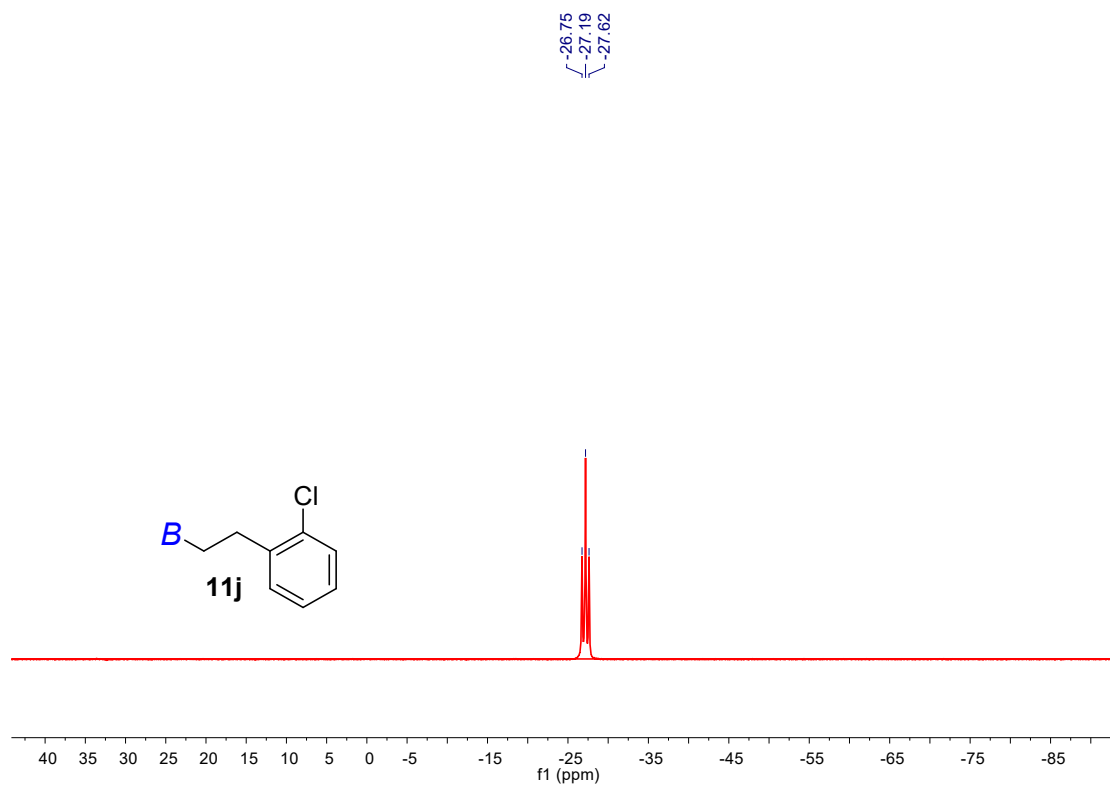

$^{11}\text{B}$  NMR (193 MHz,  $\text{CDCl}_3$ )

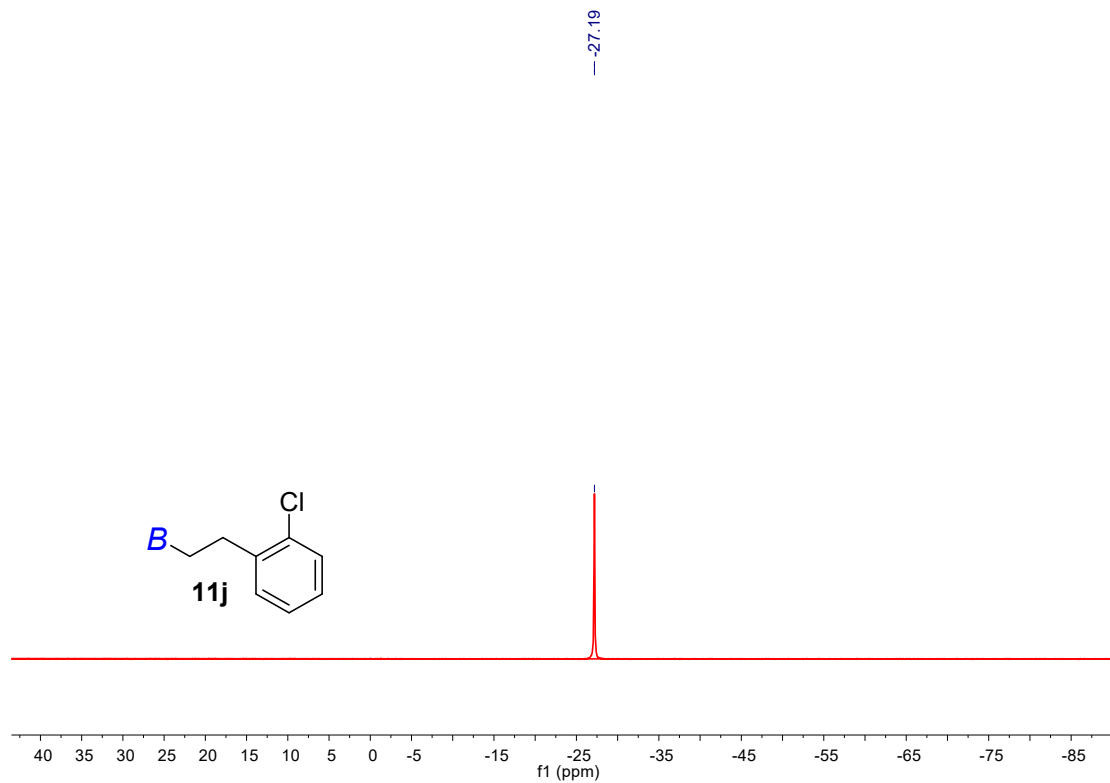

$^{11}\text{B}\{^1\text{H}\}$  NMR (193 MHz,  $\text{CDCl}_3$ )

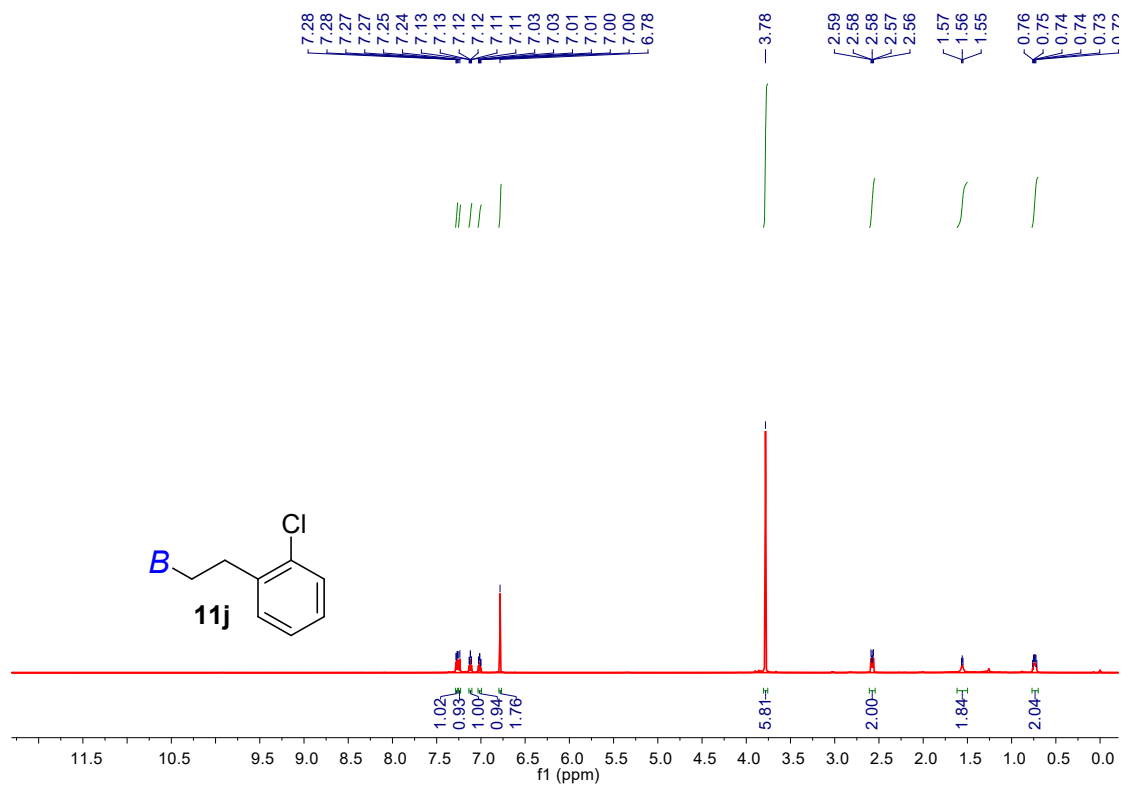

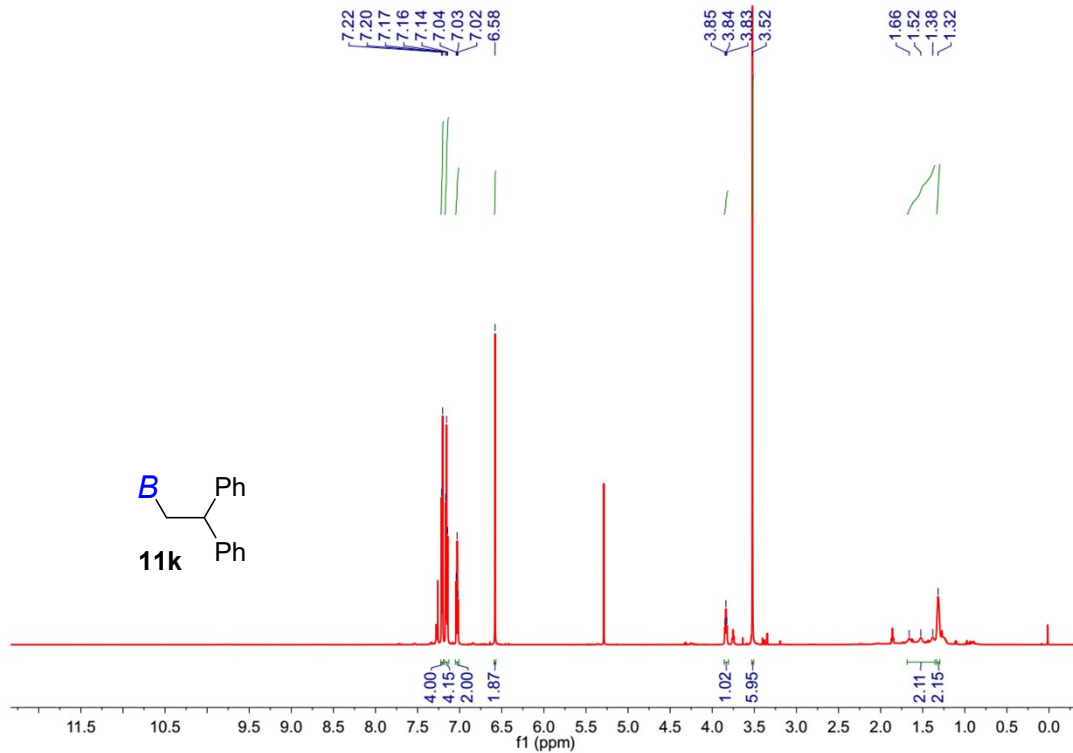

$^1\text{H}$  NMR (600 MHz,  $\text{CDCl}_3$ )

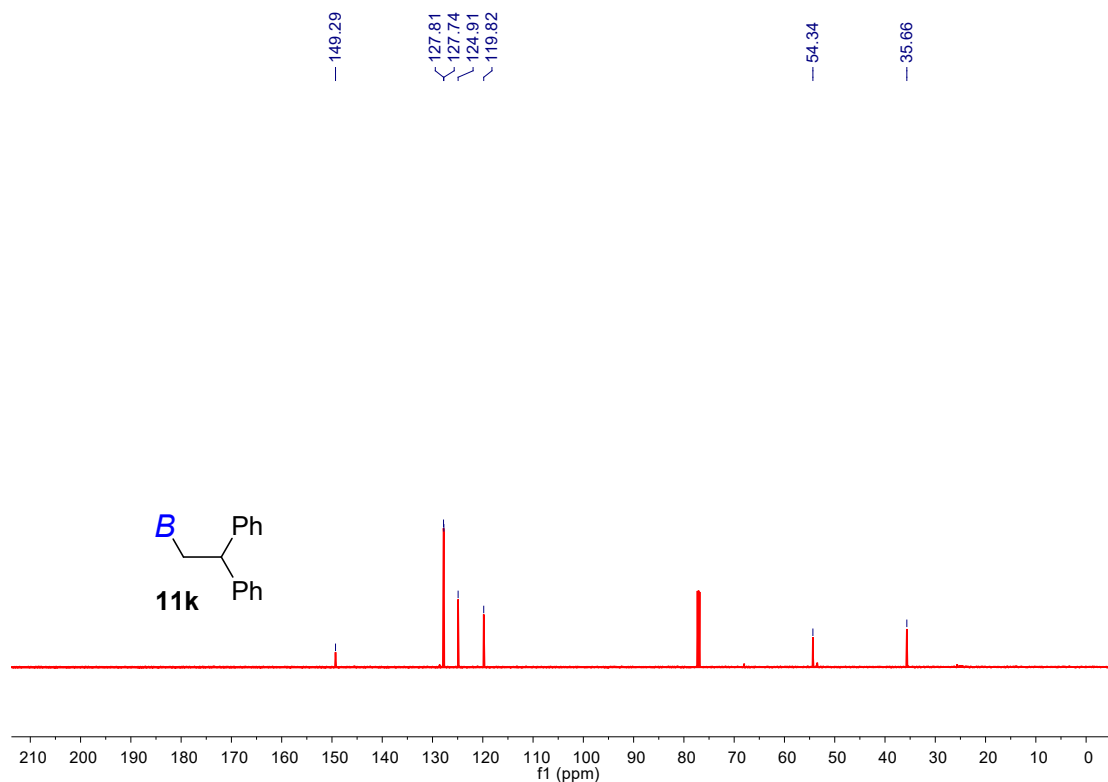

$^{13}\text{C}$  NMR (151 MHz,  $\text{CDCl}_3$ )

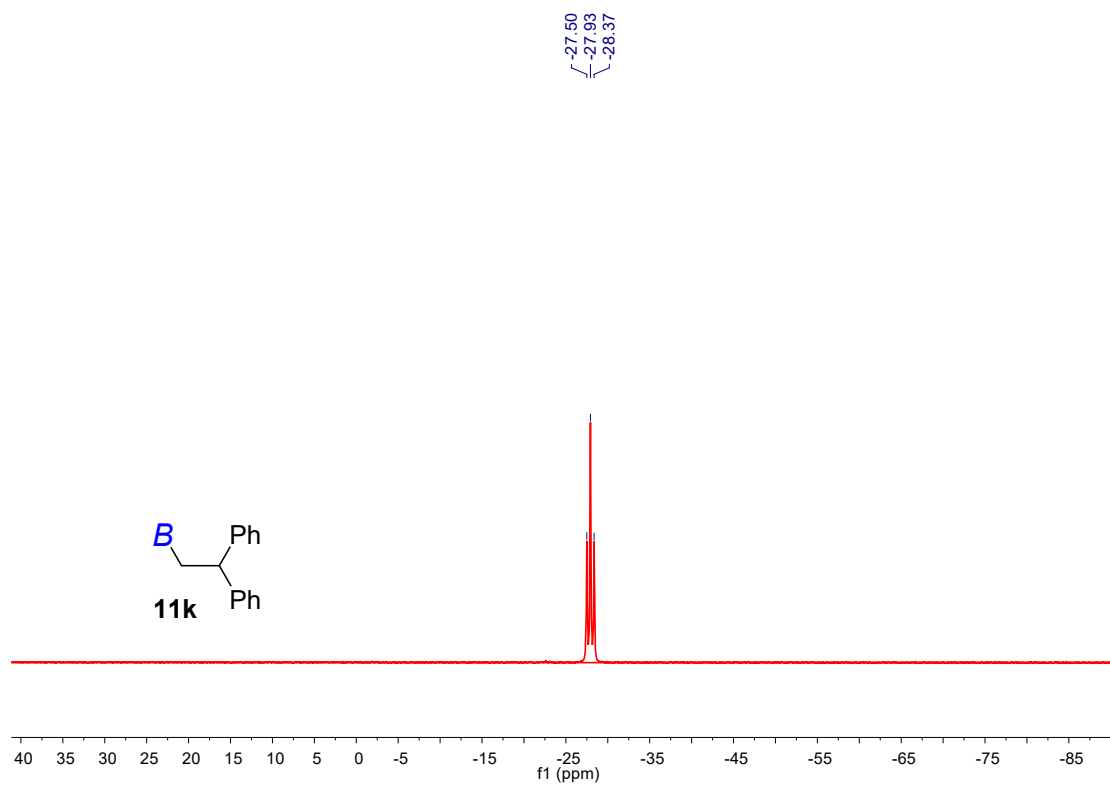

$^{11}\text{B}$  NMR (193 MHz,  $\text{CDCl}_3$ )

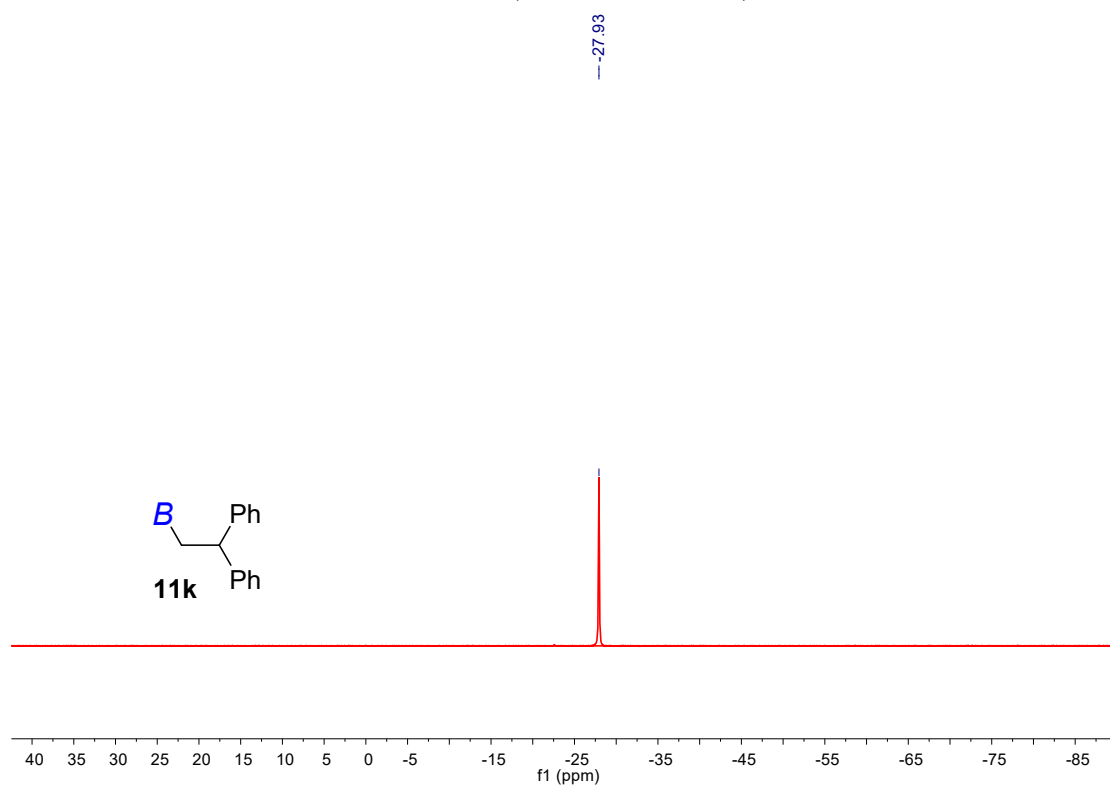

$^{11}\text{B}\{^1\text{H}\}$  NMR (193 MHz,  $\text{CDCl}_3$ )

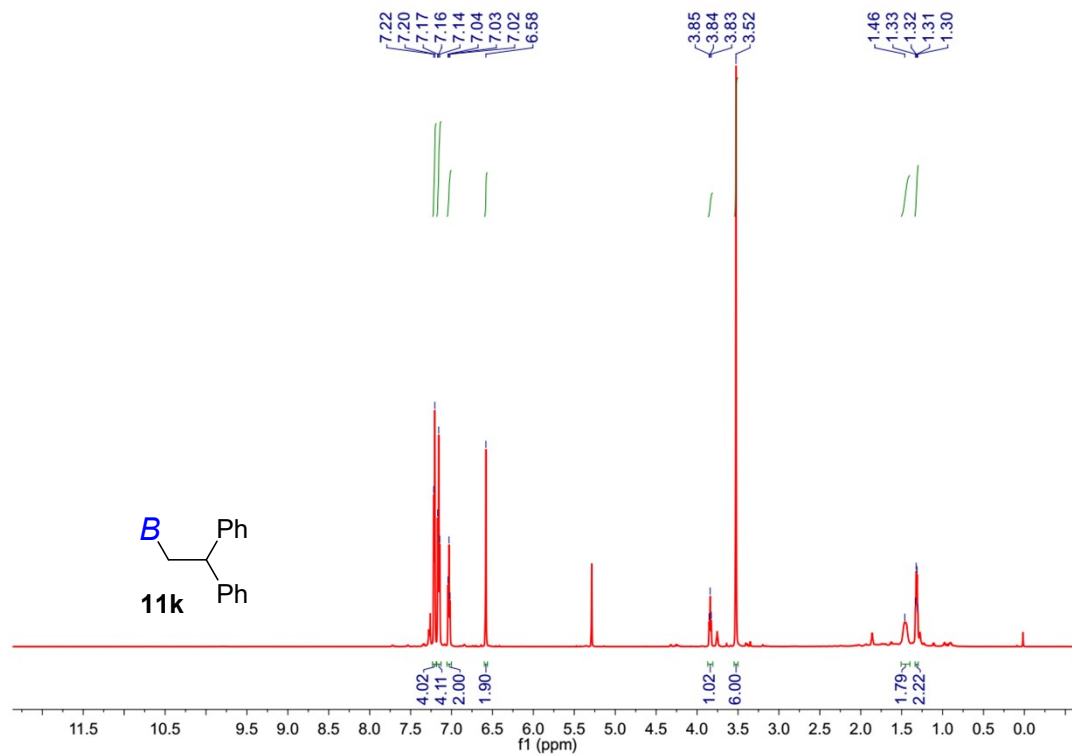

$^1\text{H}\{^{11}\text{B}\}$  NMR (600 MHz,  $\text{CDCl}_3$ )



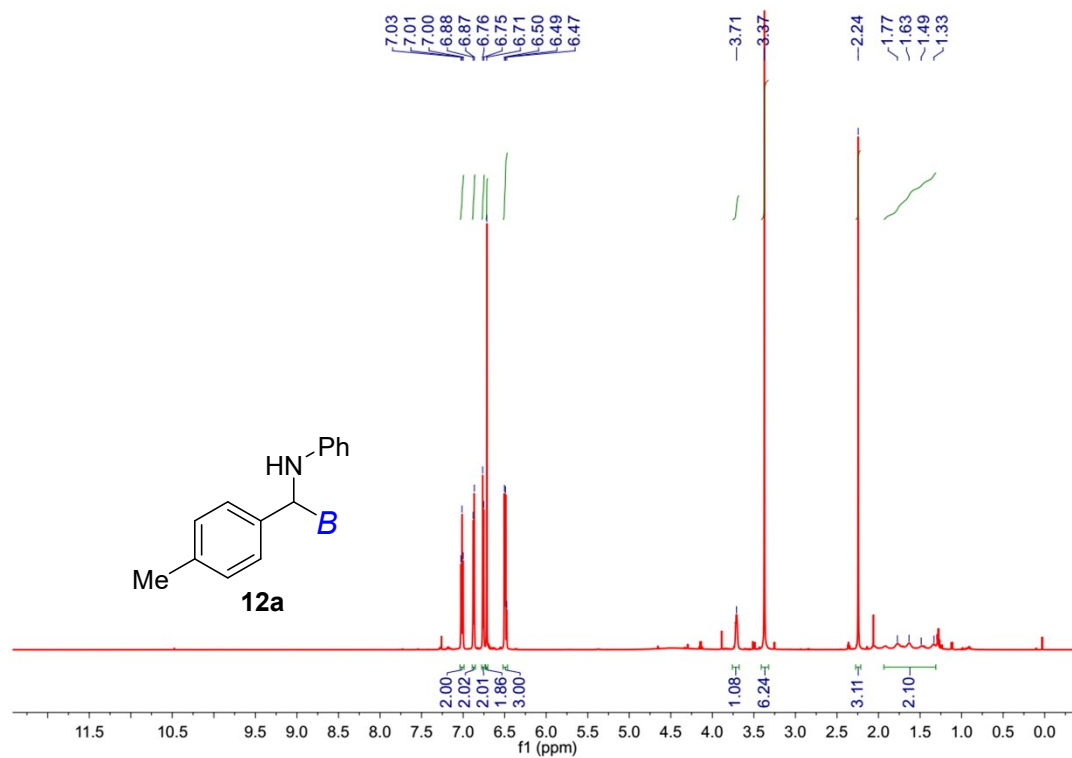

<sup>1</sup>H NMR (600 MHz, CDCl<sub>3</sub>)

150.31  
148.81

132.50  
128.77  
128.49  
124.46  
120.31  
114.97  
112.88

35.57

20.98

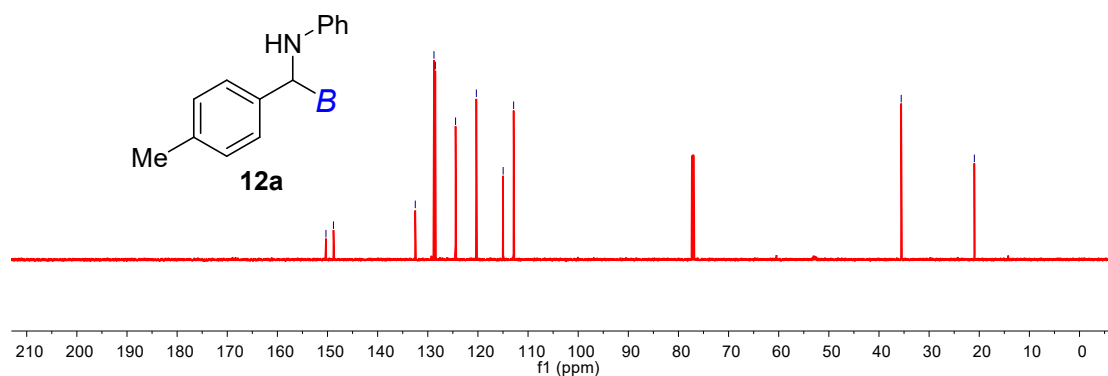

<sup>13</sup>C NMR (151 MHz, CDCl<sub>3</sub>)

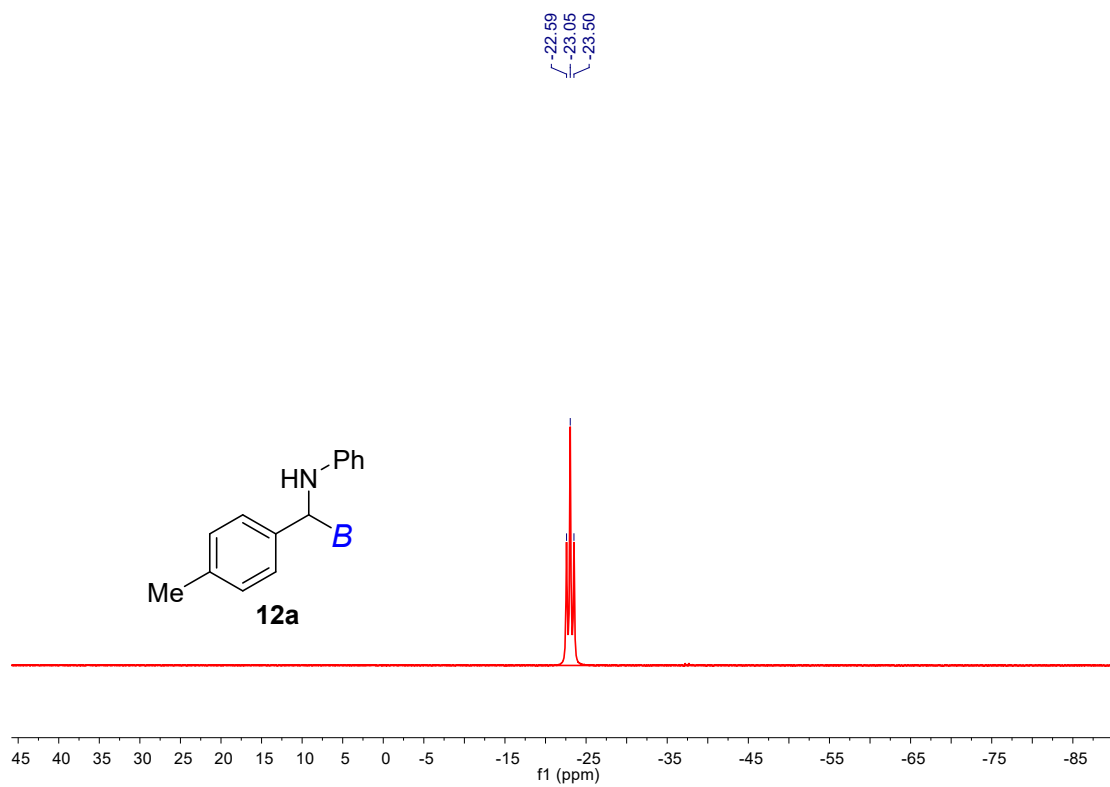

$^{11}\text{B}$  NMR (193 MHz,  $\text{CDCl}_3$ )

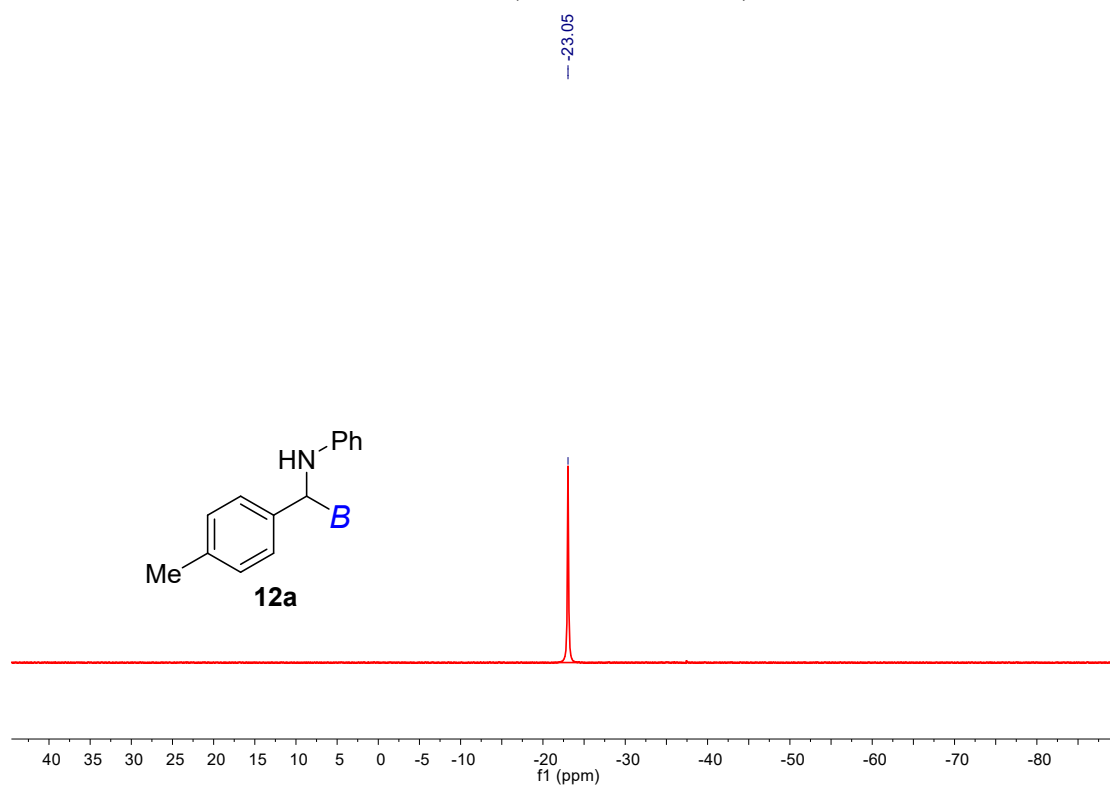

$^{11}\text{B}\{^1\text{H}\}$  NMR (193 MHz,  $\text{CDCl}_3$ )

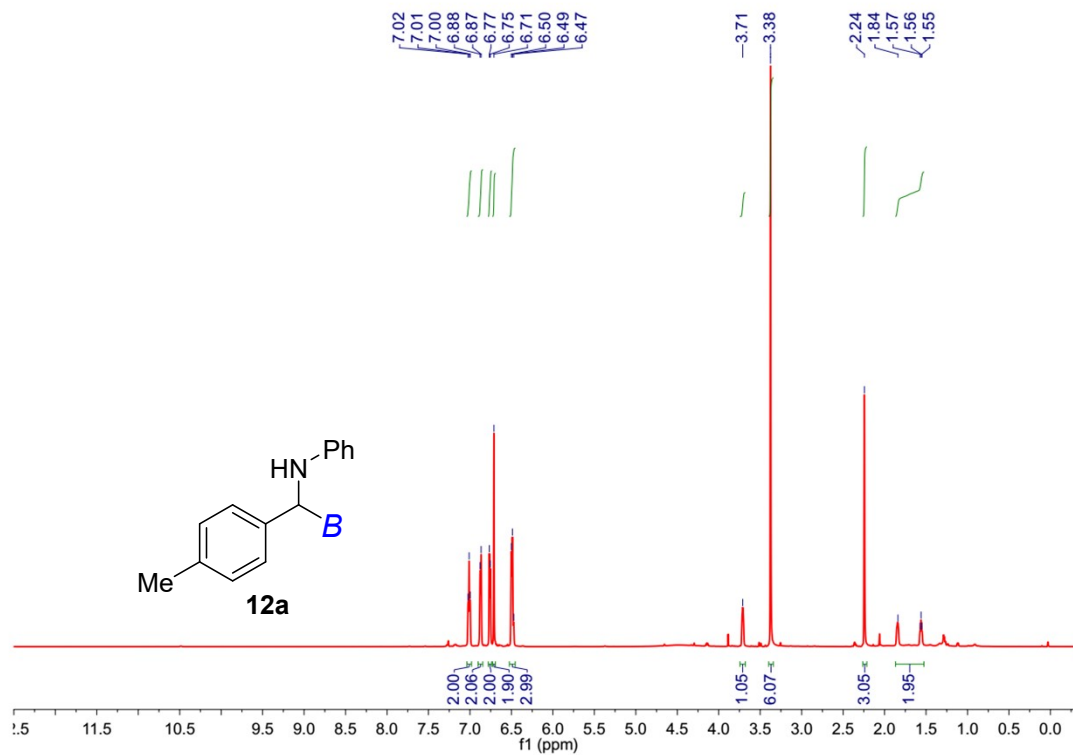

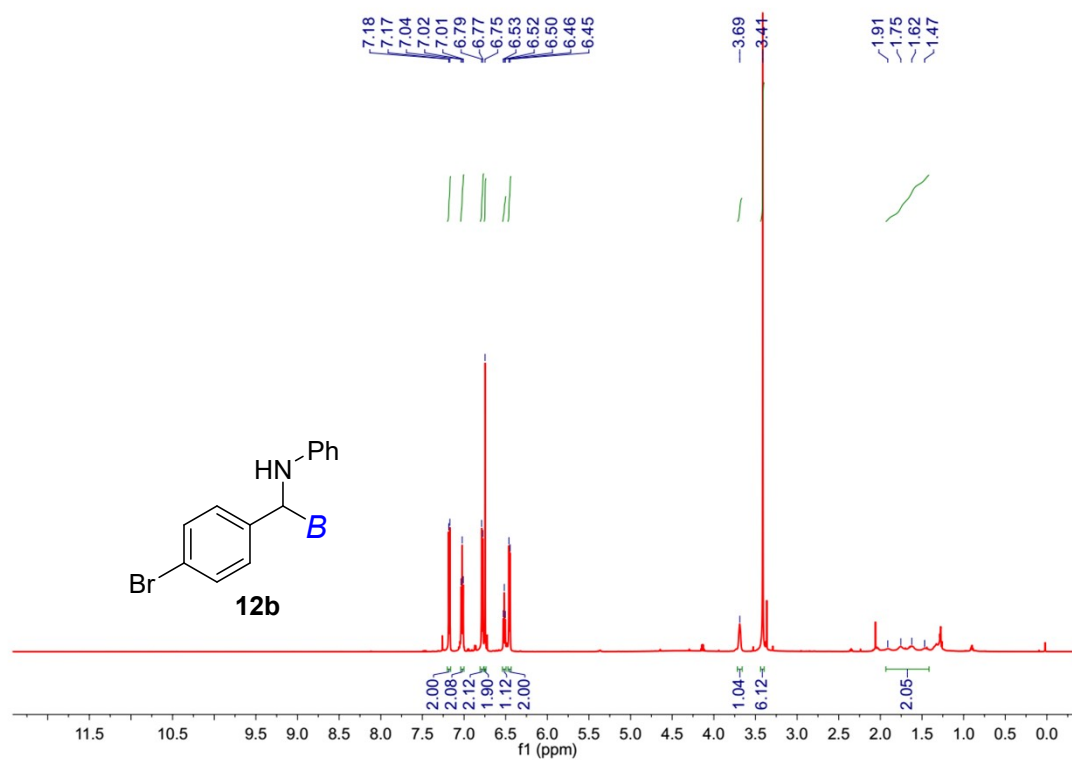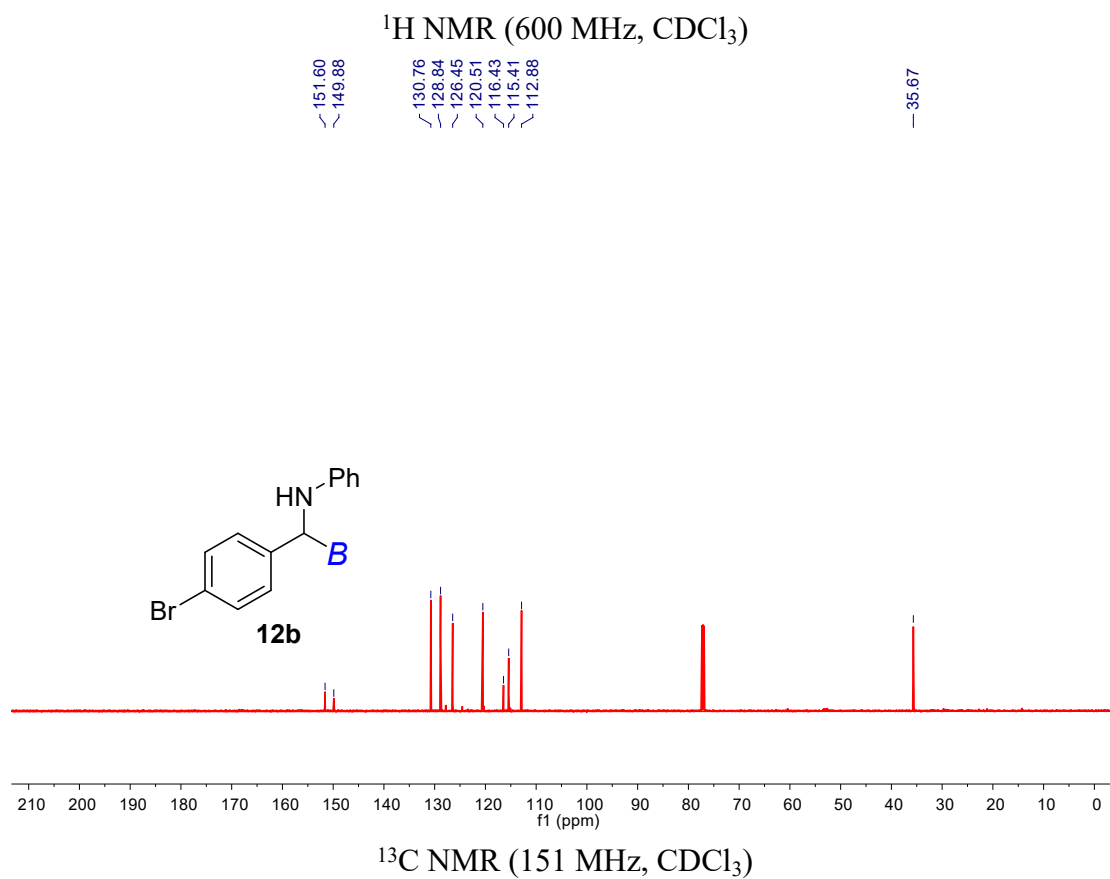

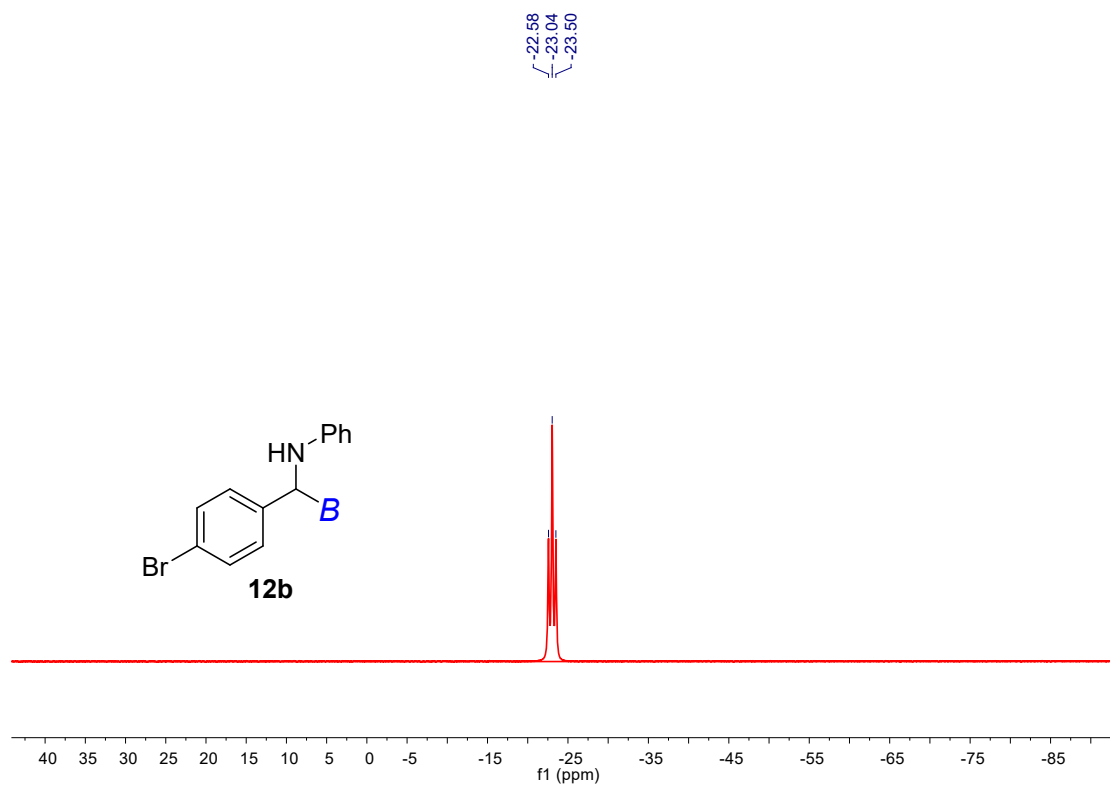

$^{11}\text{B}$  NMR (193 MHz,  $\text{CDCl}_3$ )

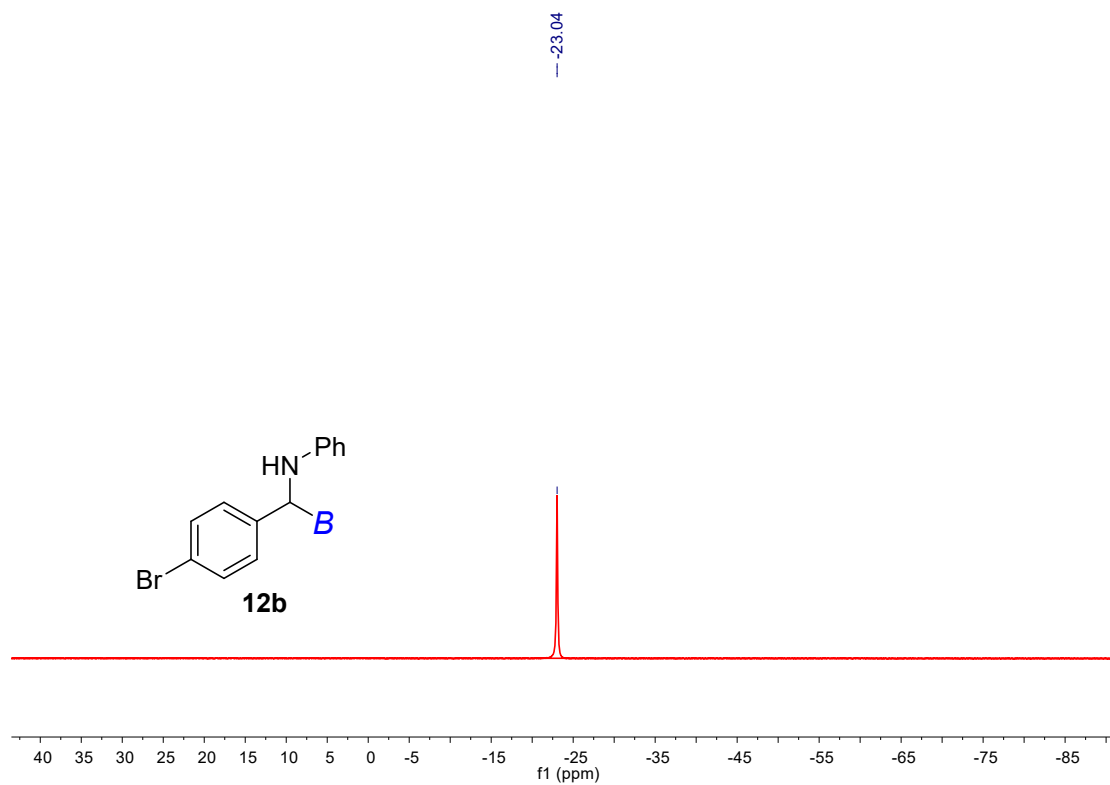

$^{11}\text{B}\{^1\text{H}\}$  NMR (193 MHz,  $\text{CDCl}_3$ )

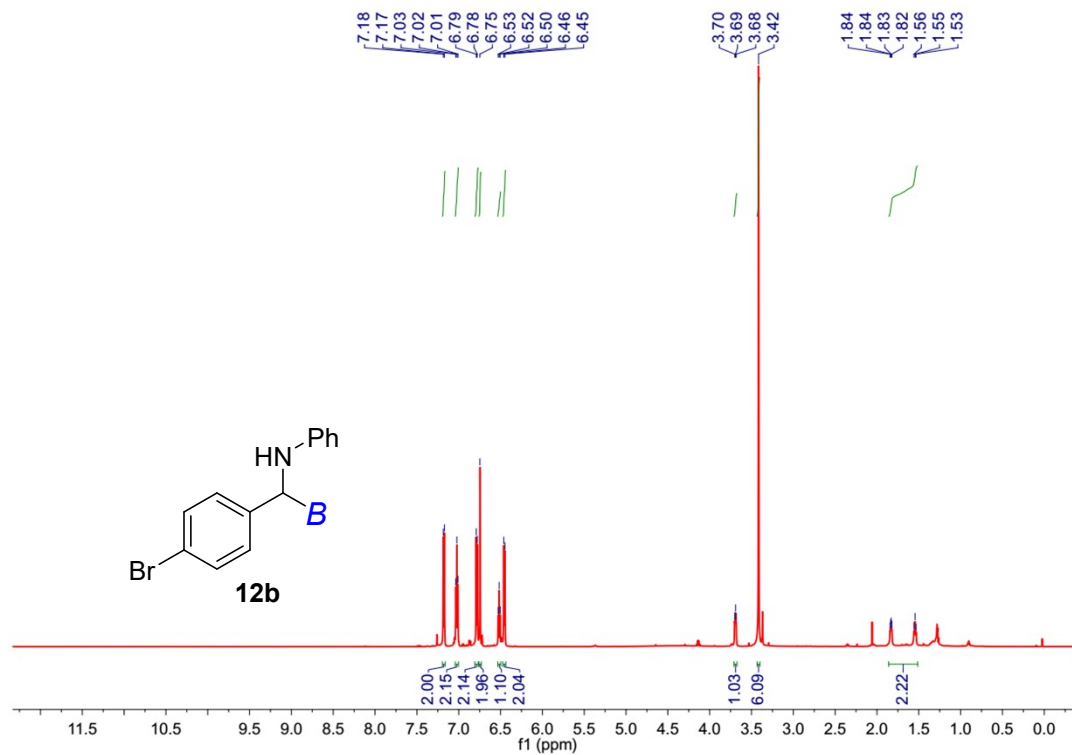

$^1\text{H}\{^{11}\text{B}\}$  NMR (600 MHz,  $\text{CDCl}_3$ )

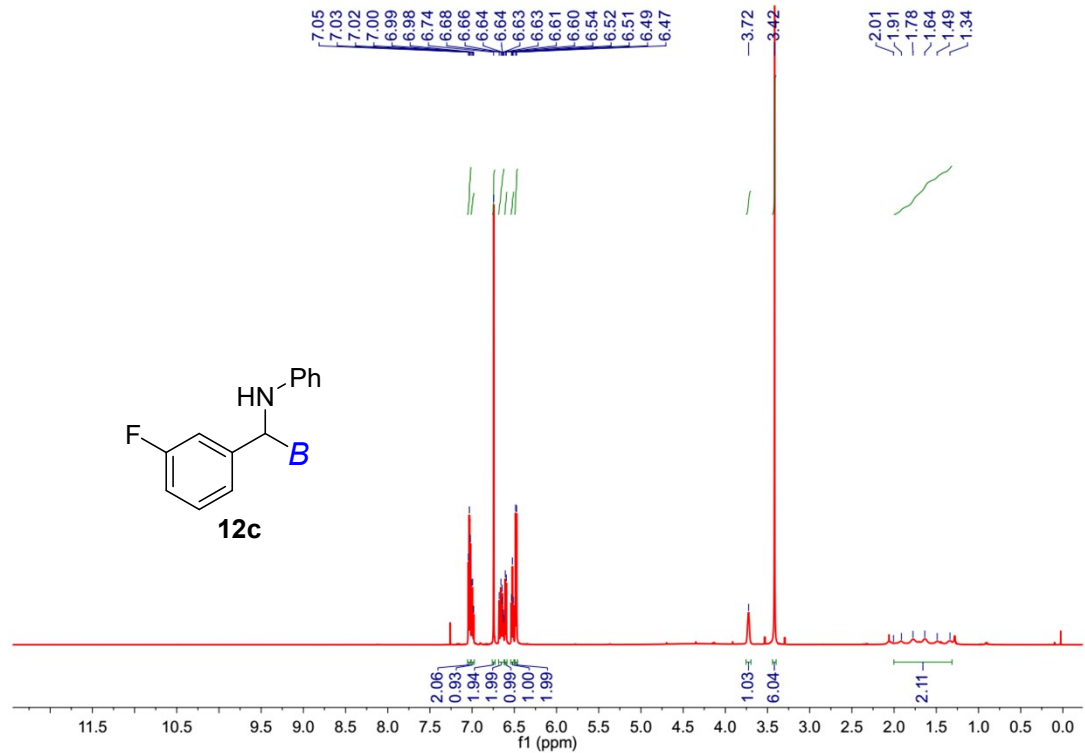

<sup>1</sup>H NMR (600 MHz, CDCl<sub>3</sub>)

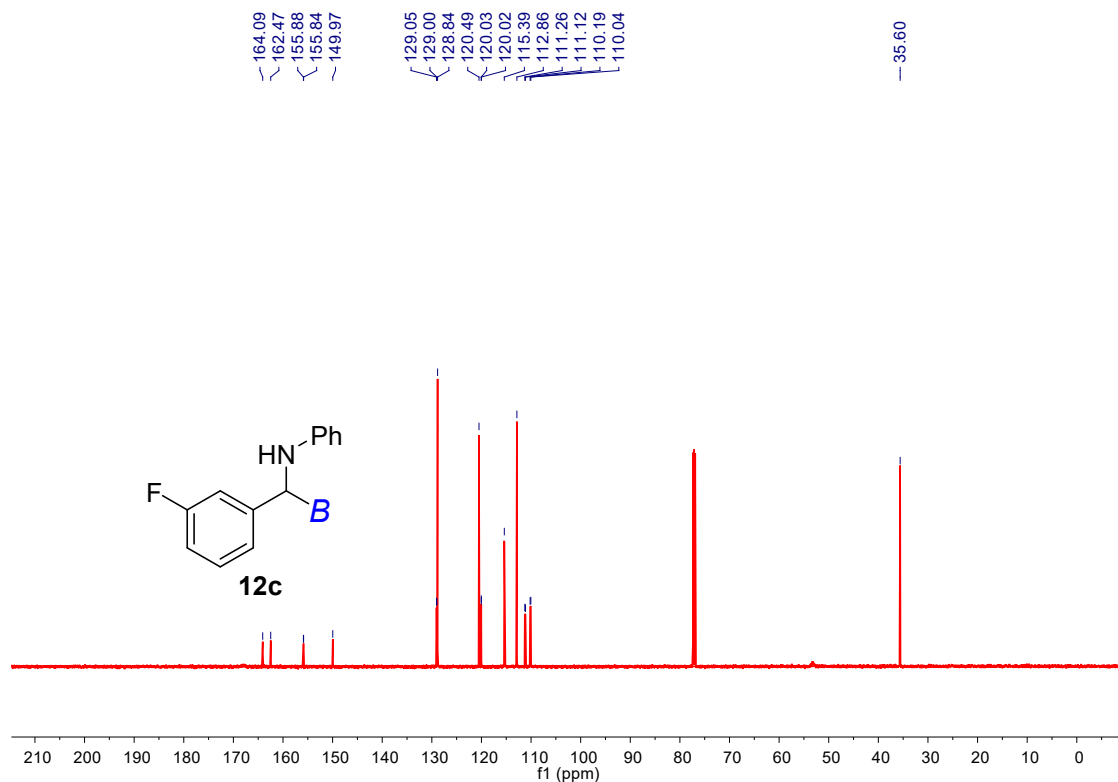

<sup>13</sup>C NMR (151 MHz, CDCl<sub>3</sub>)

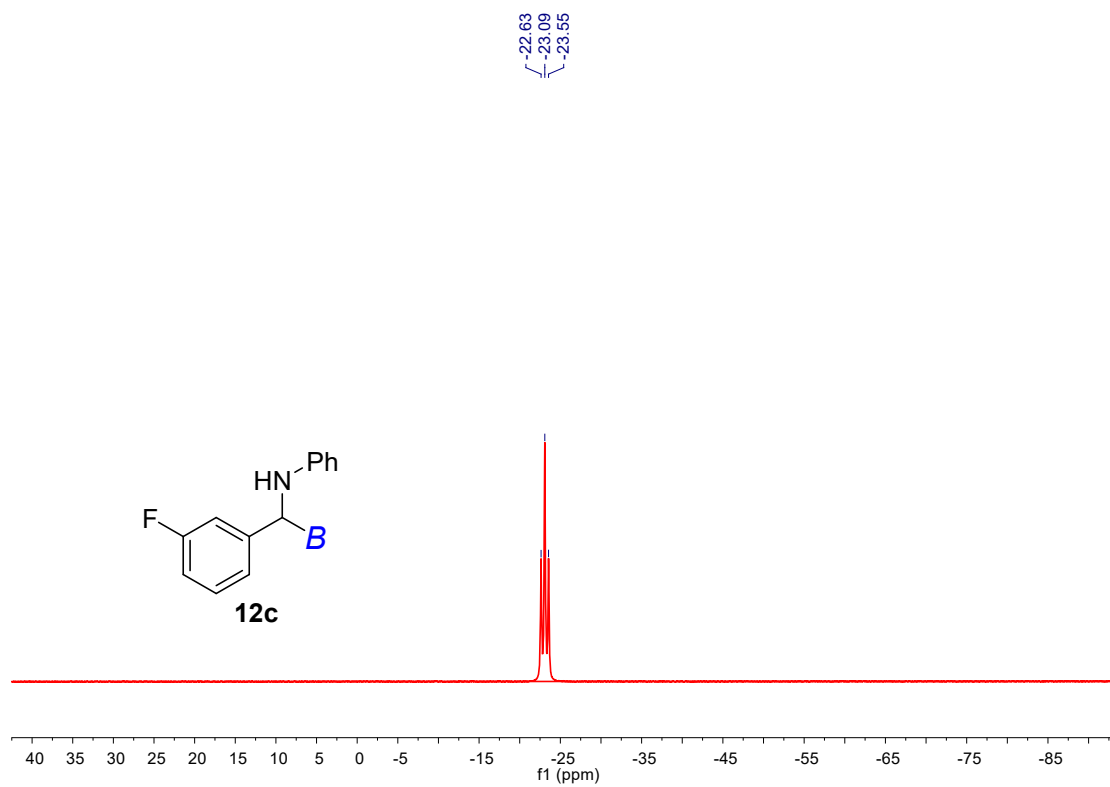

$^{11}\text{B}$  NMR (193 MHz,  $\text{CDCl}_3$ )

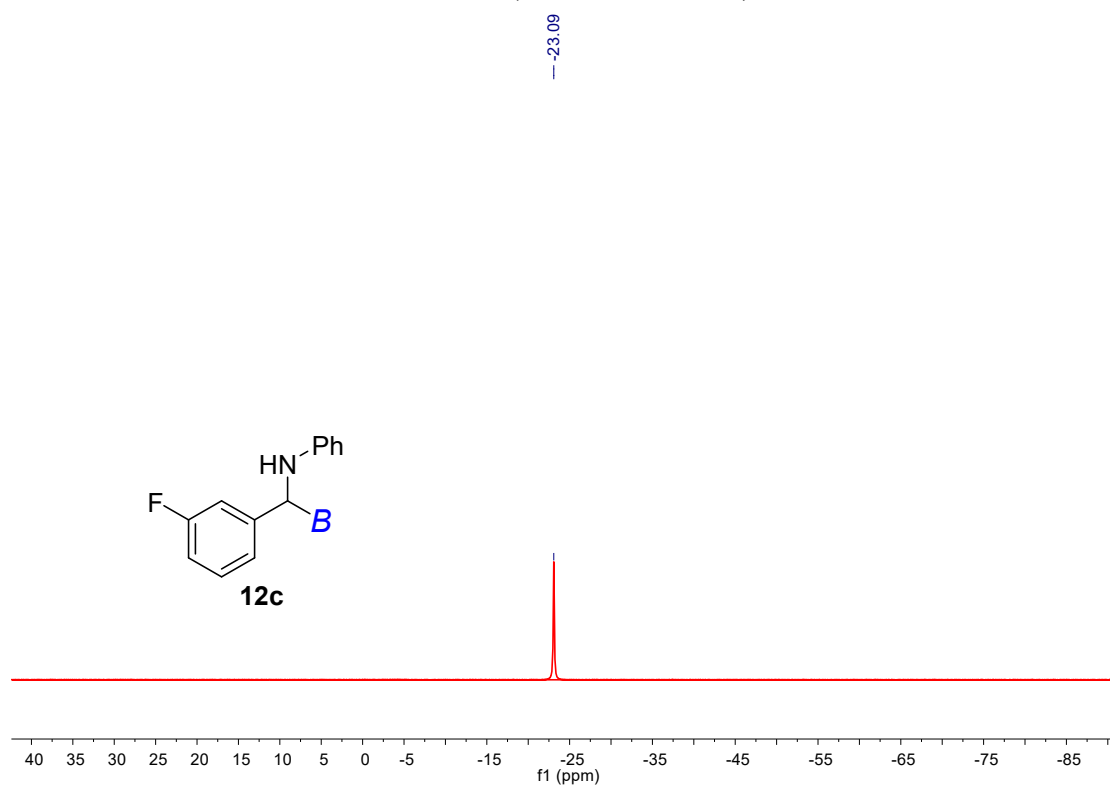

$^{11}\text{B}\{^1\text{H}\}$  NMR (193 MHz,  $\text{CDCl}_3$ )



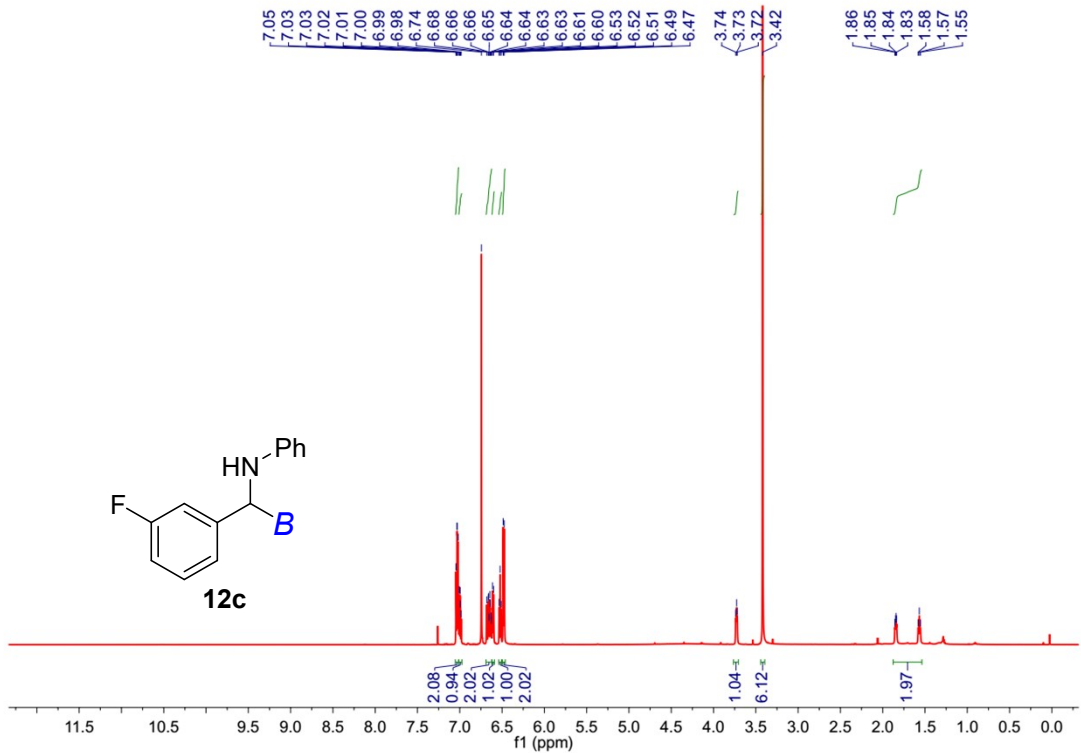

$^1\text{H}\{^{11}\text{B}\}$  NMR (600 MHz,  $\text{CDCl}_3$ )

--114.84

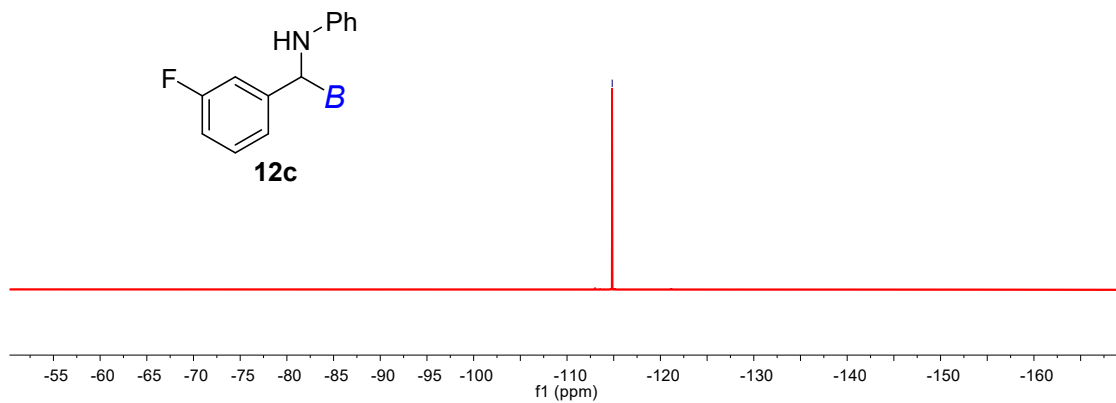

$^{19}\text{F}$  NMR (565 MHz,  $\text{CDCl}_3$ )

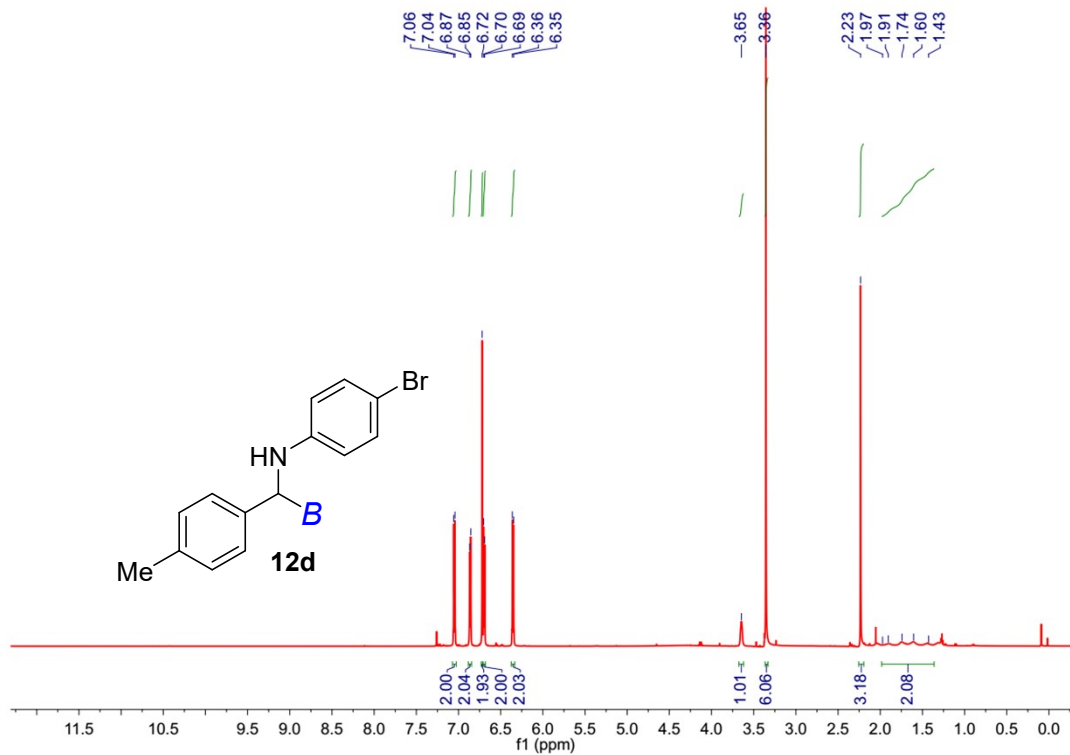

<sup>1</sup>H NMR (600 MHz, CDCl<sub>3</sub>)

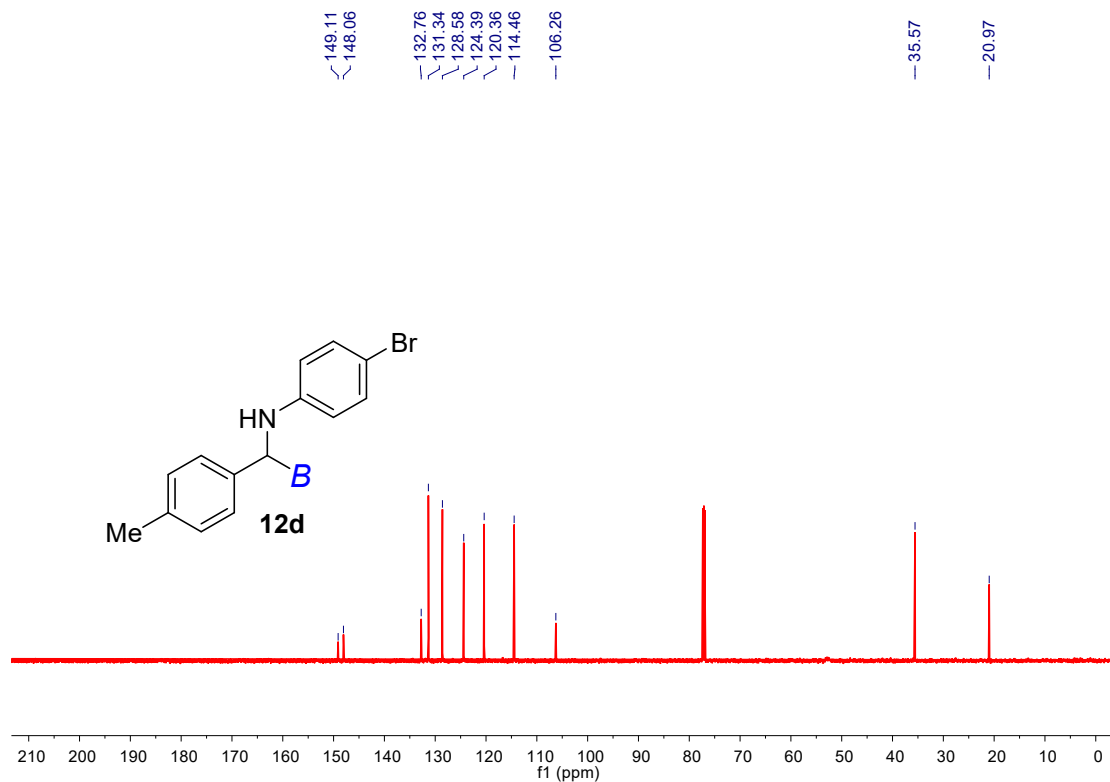

<sup>13</sup>C NMR (151 MHz, CDCl<sub>3</sub>)

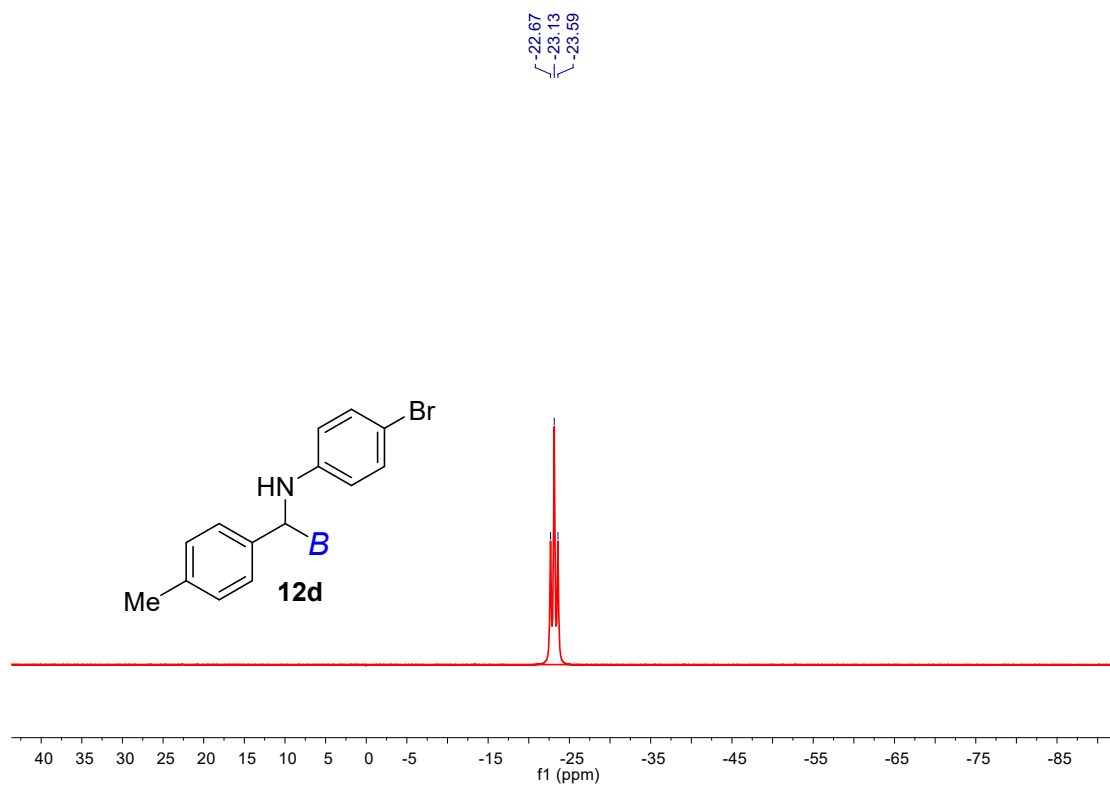

$^{11}\text{B}$  NMR (193 MHz,  $\text{CDCl}_3$ )

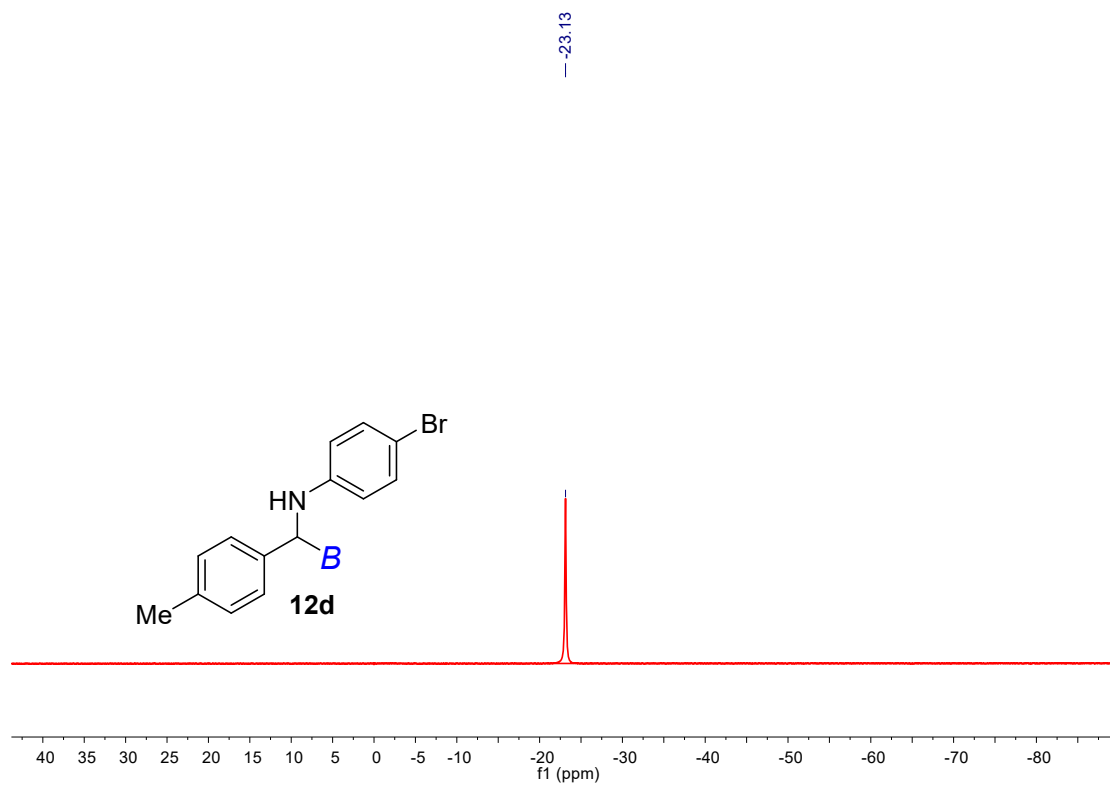

$^{11}\text{B}\{^1\text{H}\}$  NMR (193 MHz,  $\text{CDCl}_3$ )

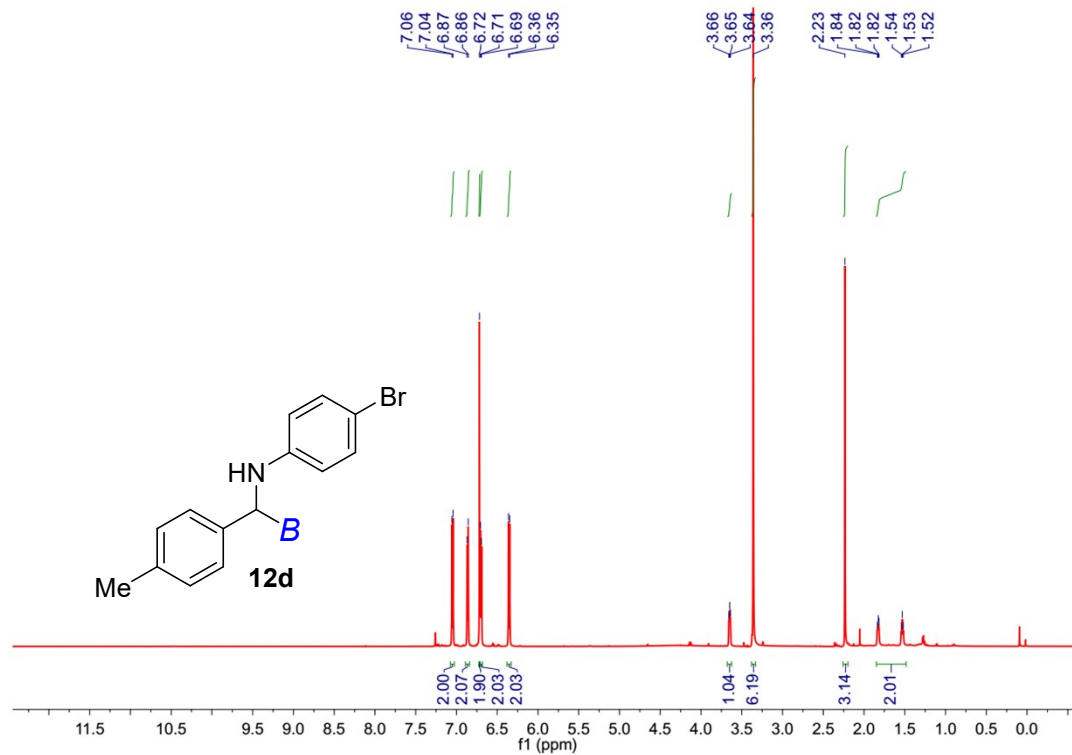

$^1\text{H}\{^{11}\text{B}\}$  NMR (600 MHz,  $\text{CDCl}_3$ )

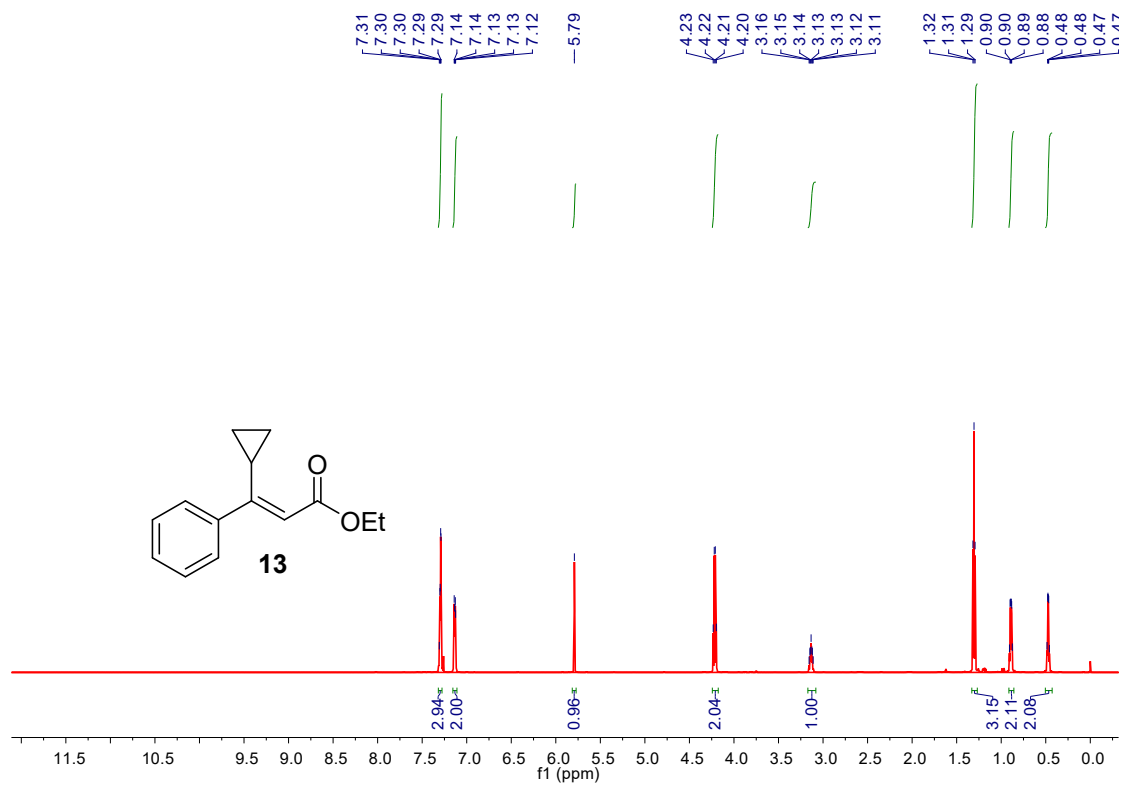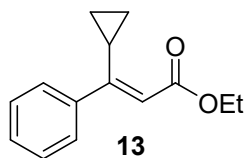

— 166.95  
— 163.18  
— 138.85  
— 128.04  
— 127.76  
— 127.73  
— 118.79  
— 59.78  
— 14.36  
— 13.51  
— 6.91

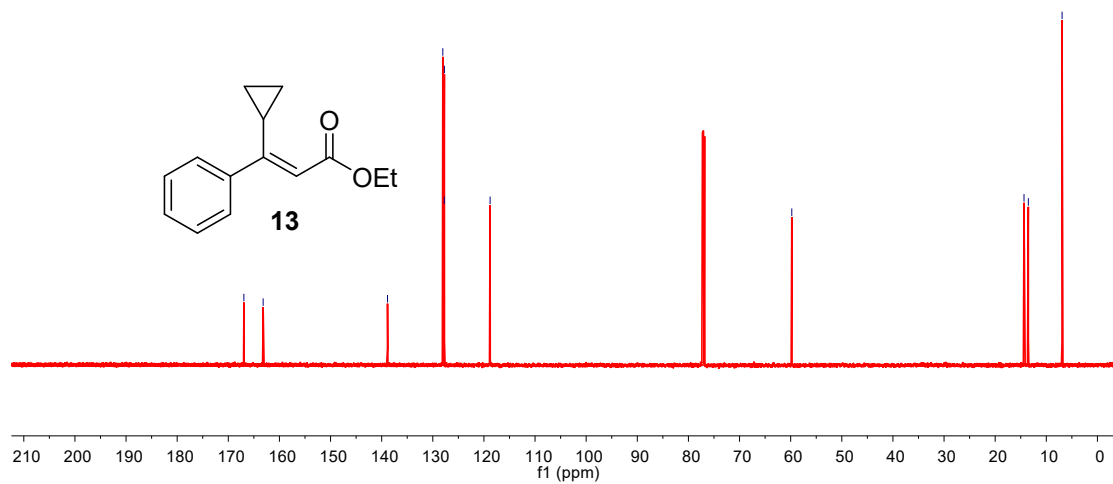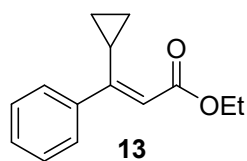

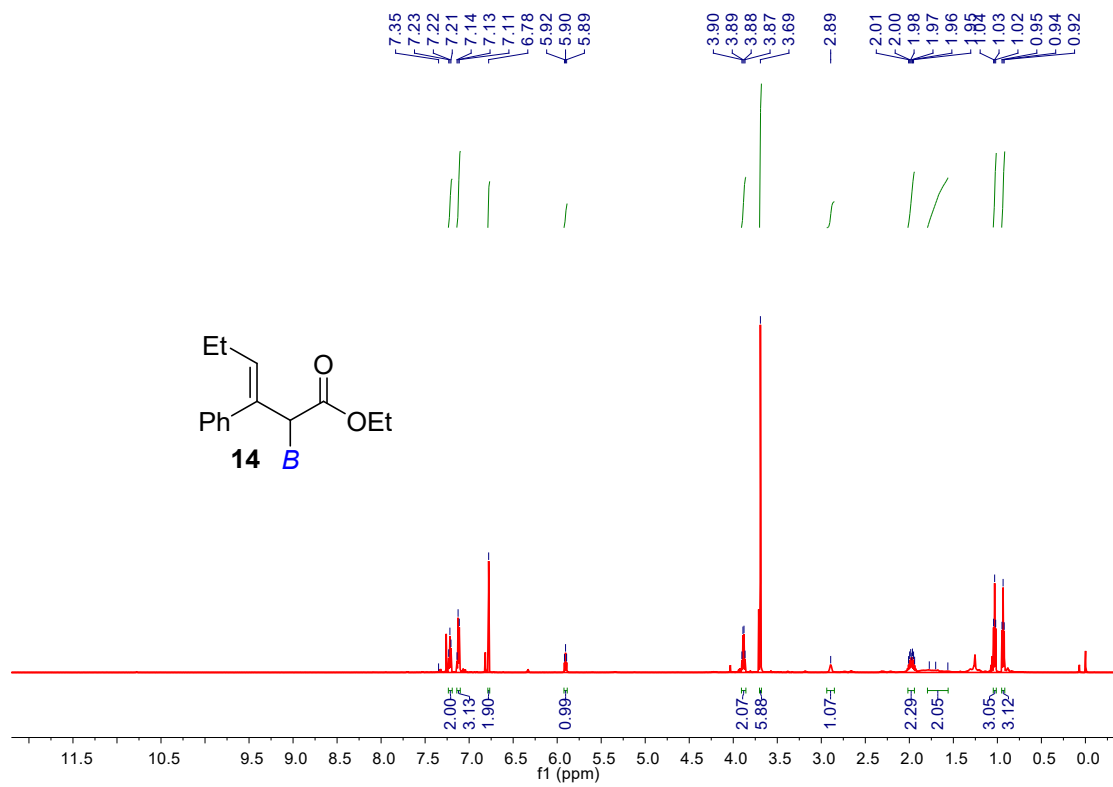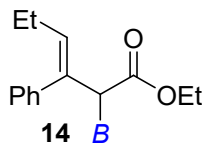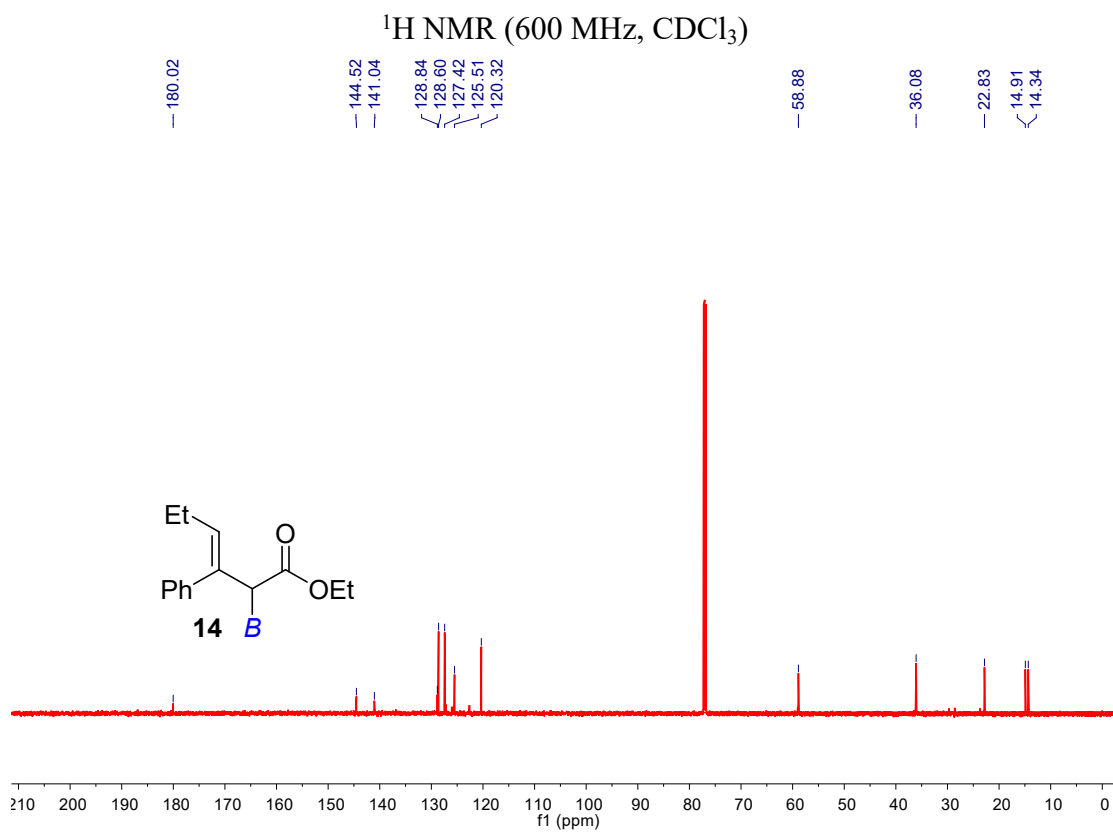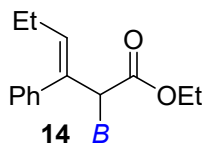

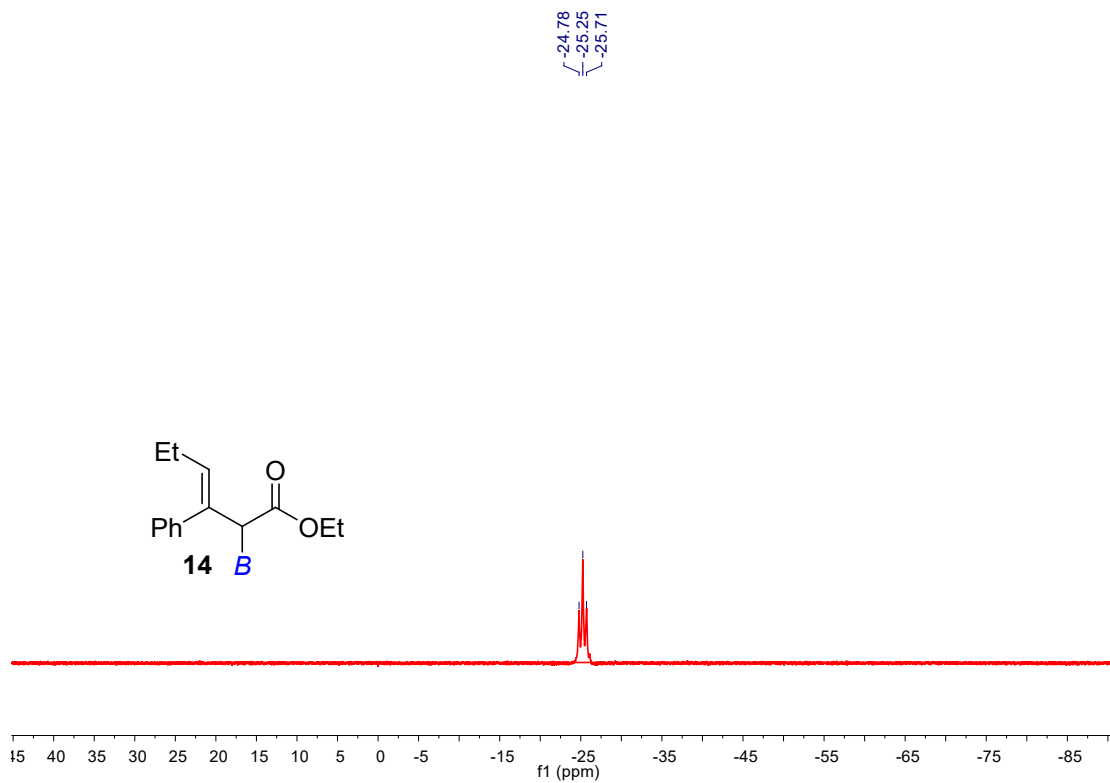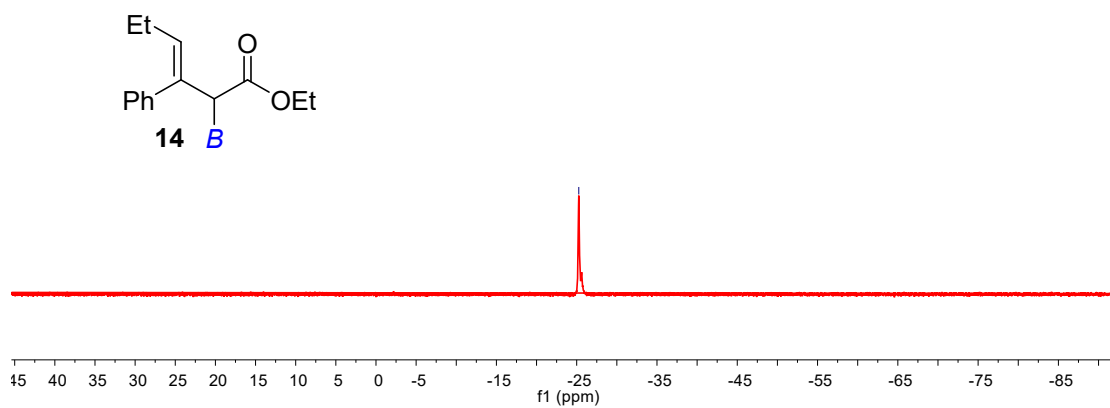

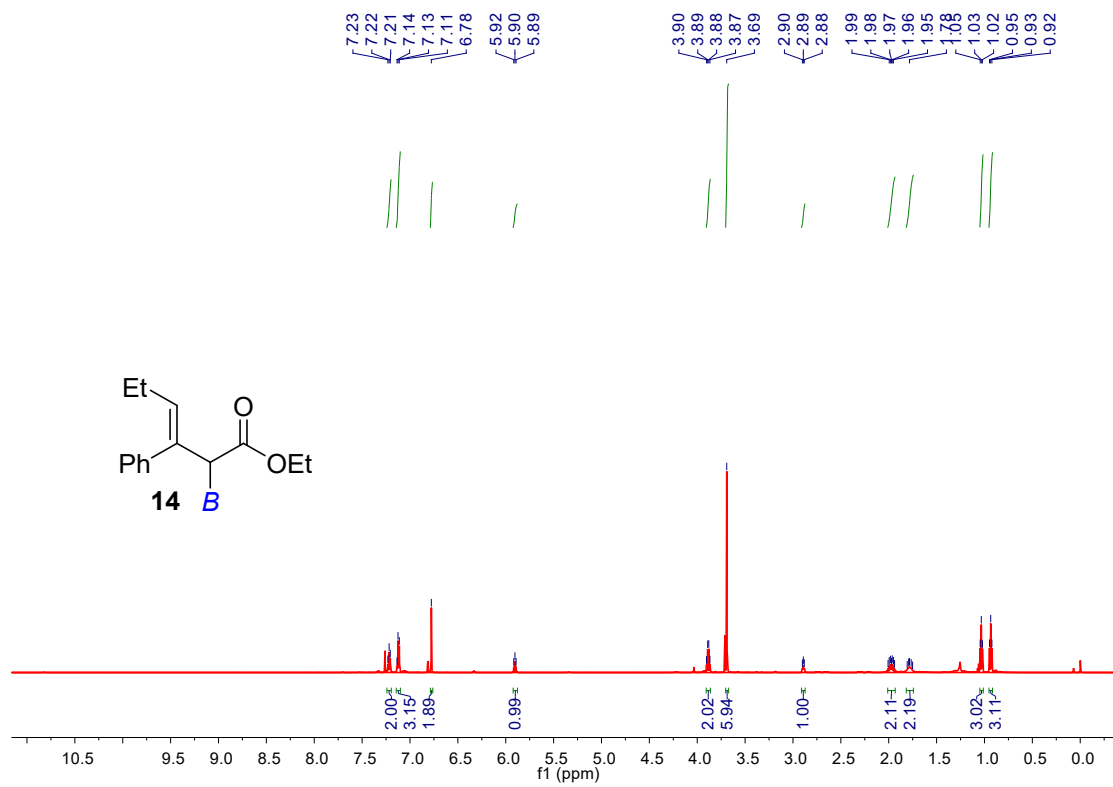

$^1\text{H}\{^{11}\text{B}\}$  NMR (600 MHz,  $\text{CDCl}_3$ )



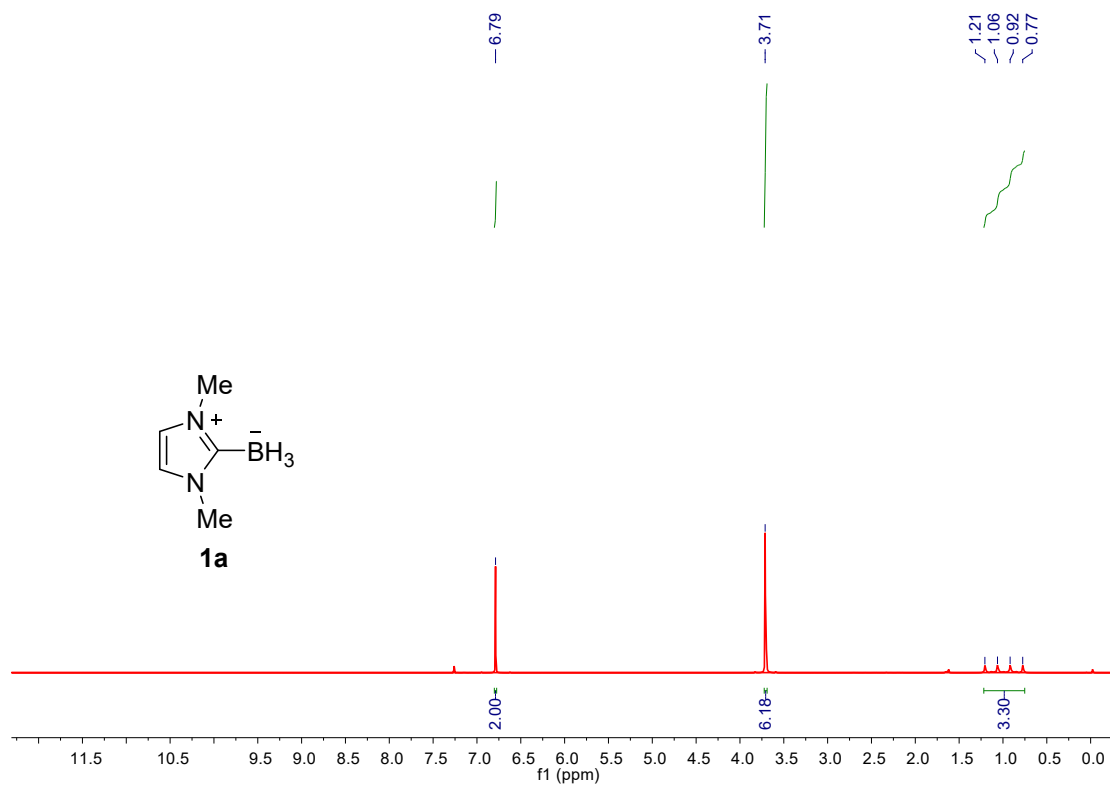

<sup>1</sup>H NMR (600 MHz, CDCl<sub>3</sub>)

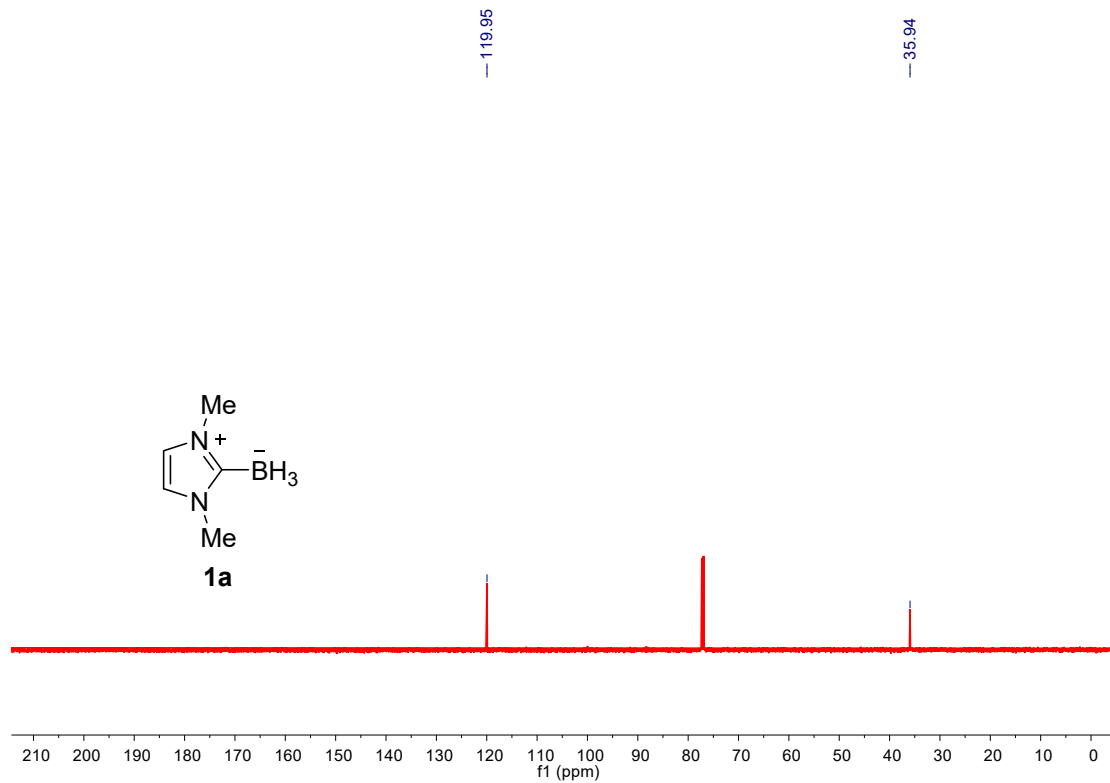

<sup>13</sup>C NMR (151 MHz, CDCl<sub>3</sub>)

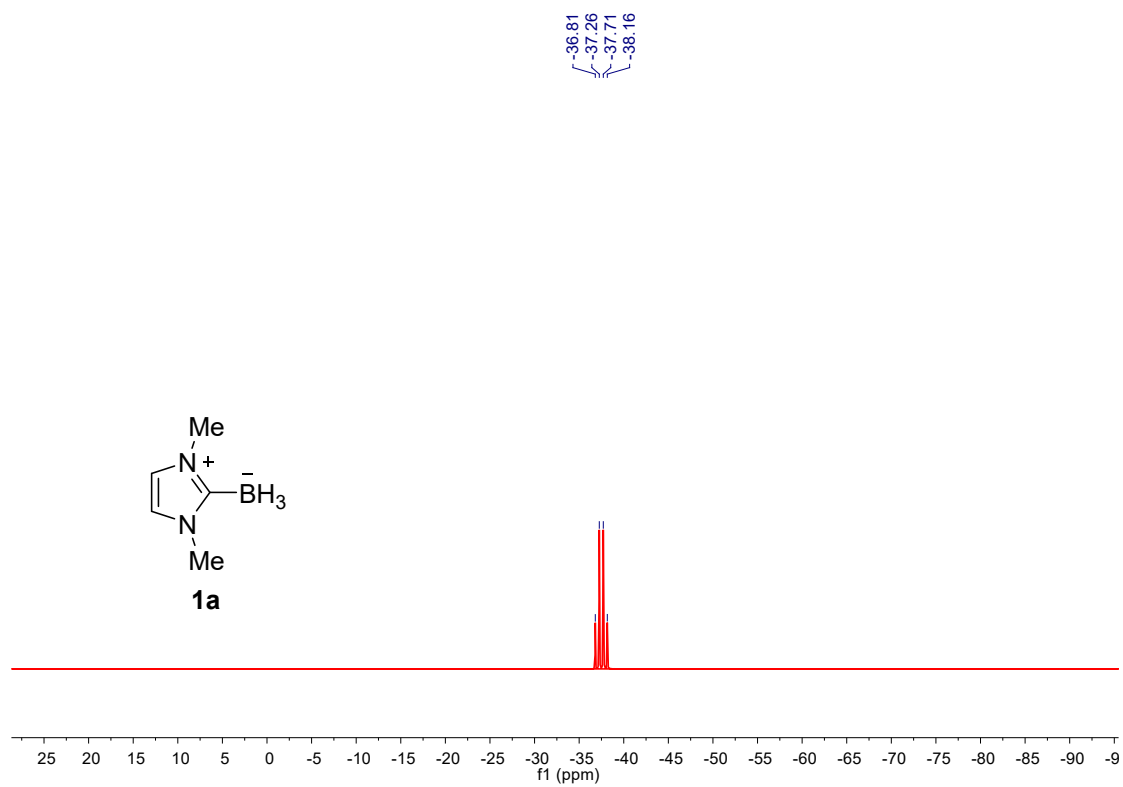

$^{11}\text{B}$  NMR (193 MHz,  $\text{CDCl}_3$ )

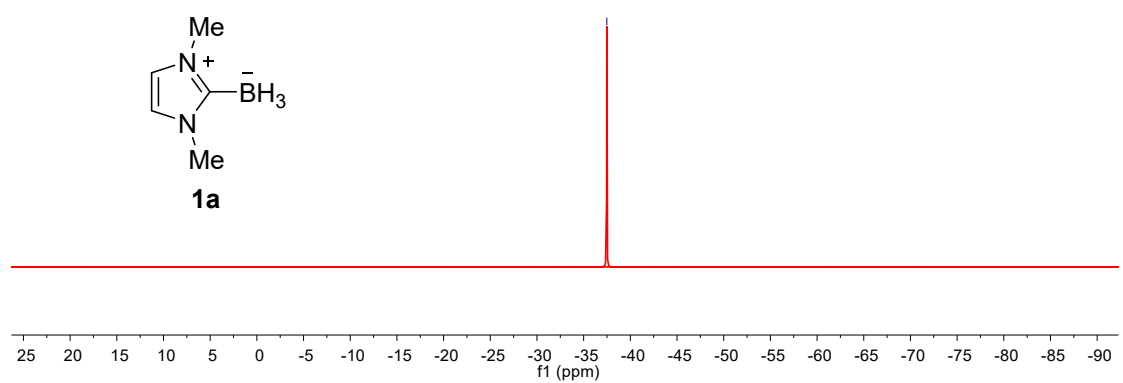

$^{11}\text{B}\{^1\text{H}\}$  NMR (193 MHz,  $\text{CDCl}_3$ )

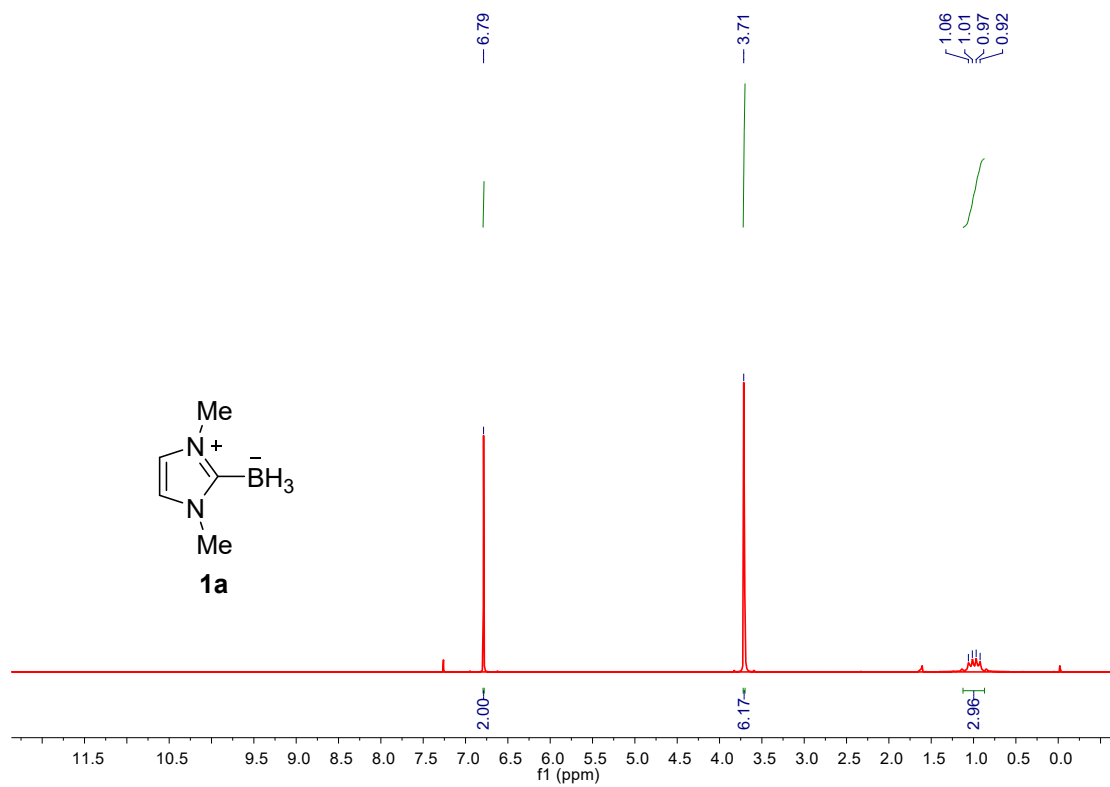

$^1\text{H}\{^{11}\text{B}\}$  NMR (600 MHz,  $\text{CDCl}_3$ )

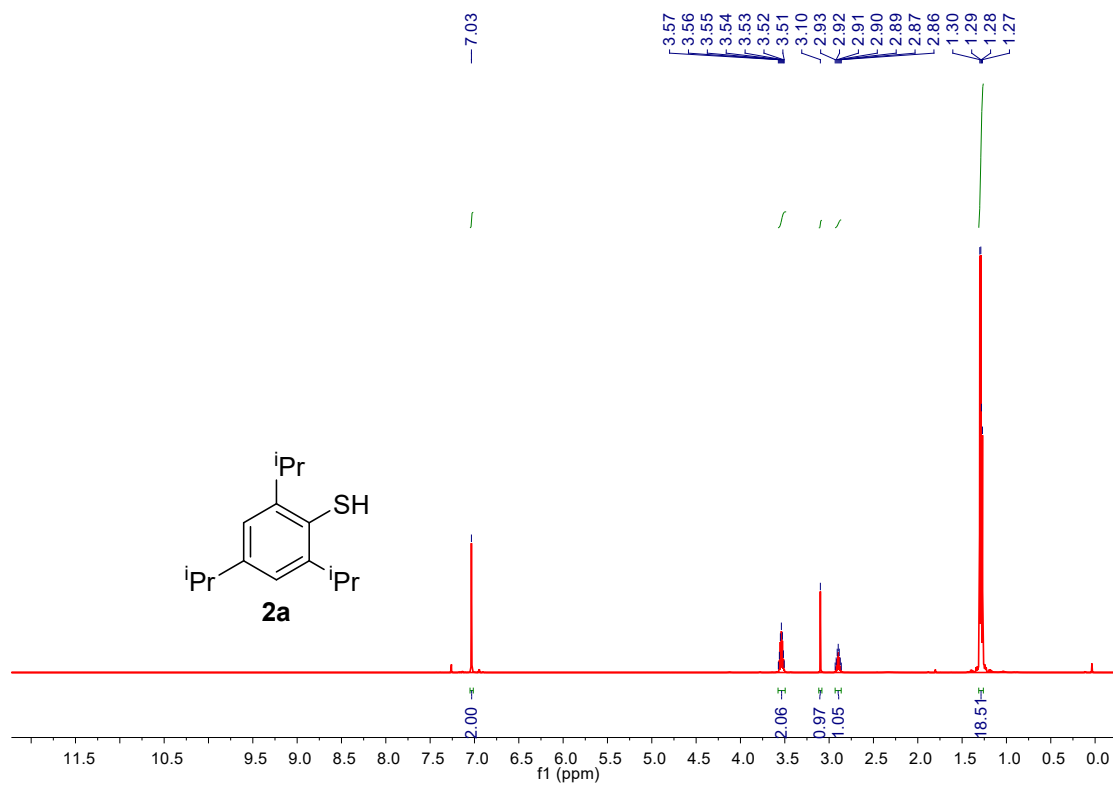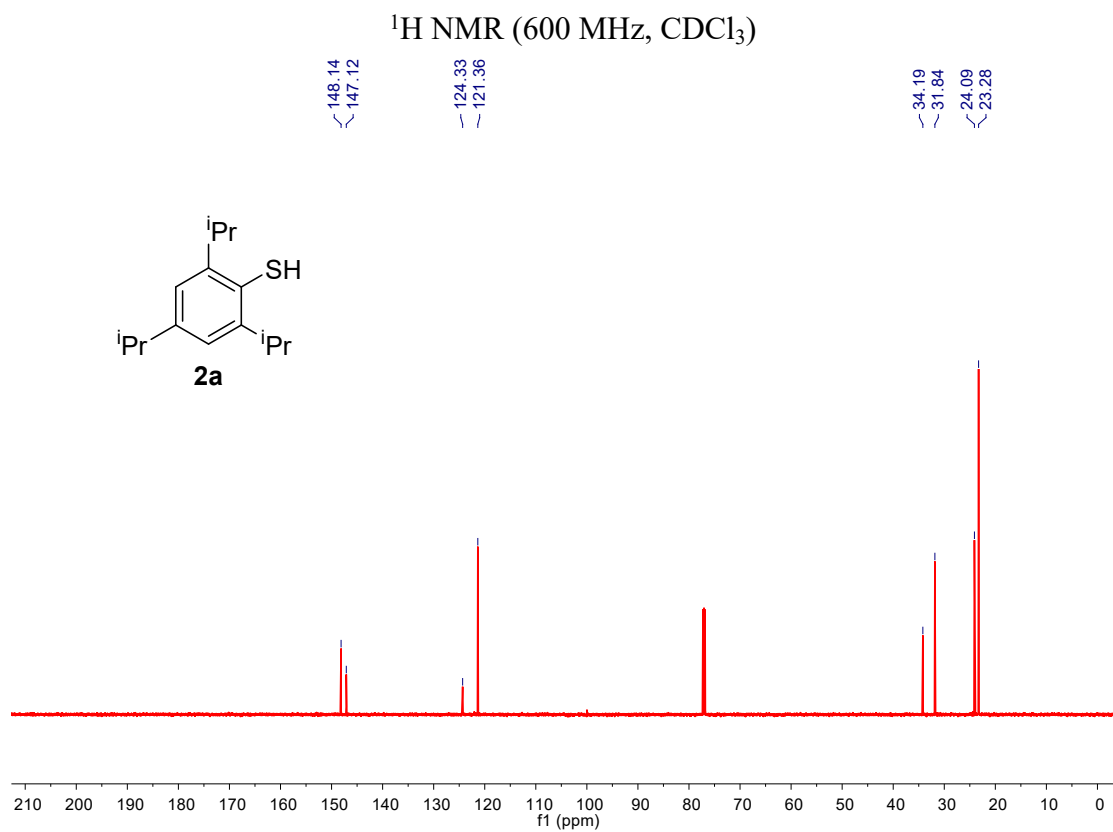

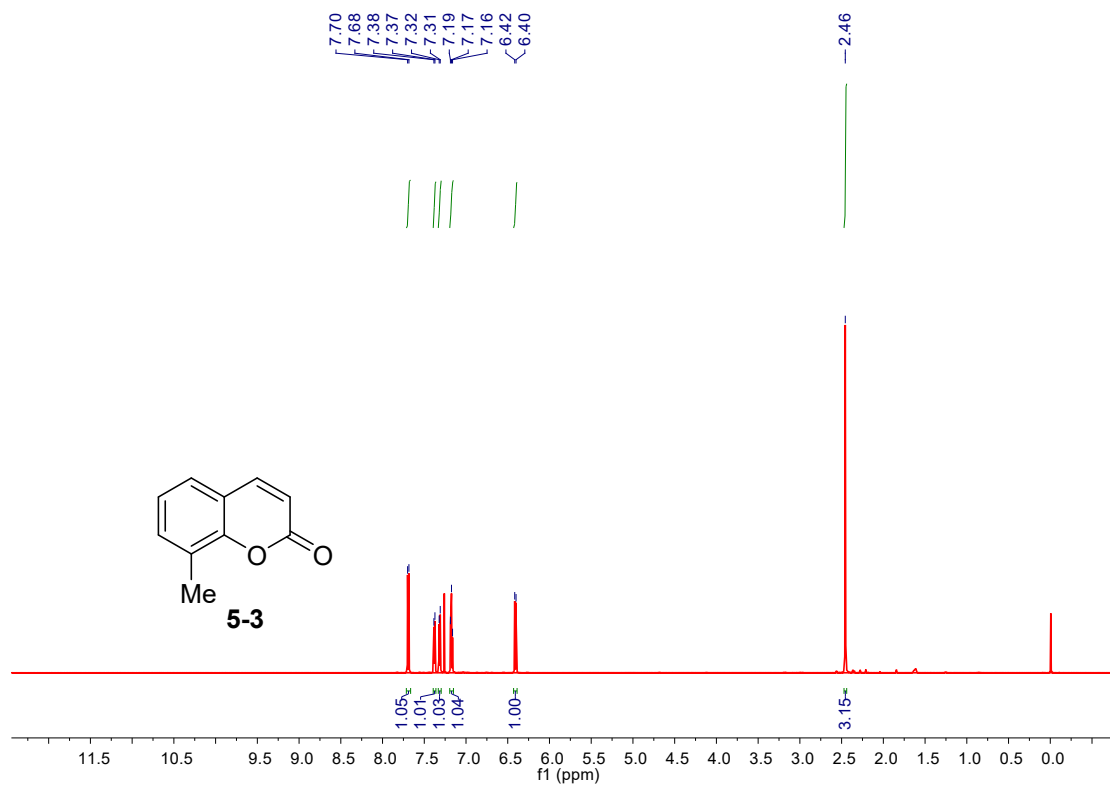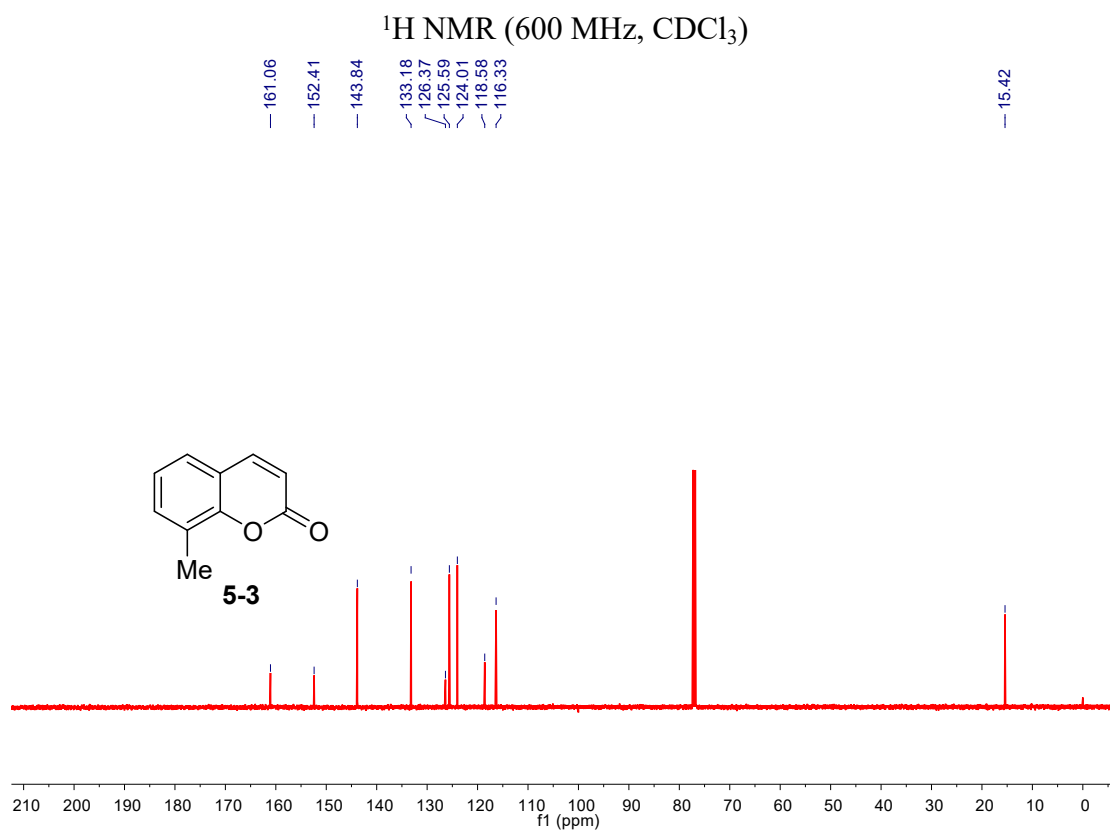

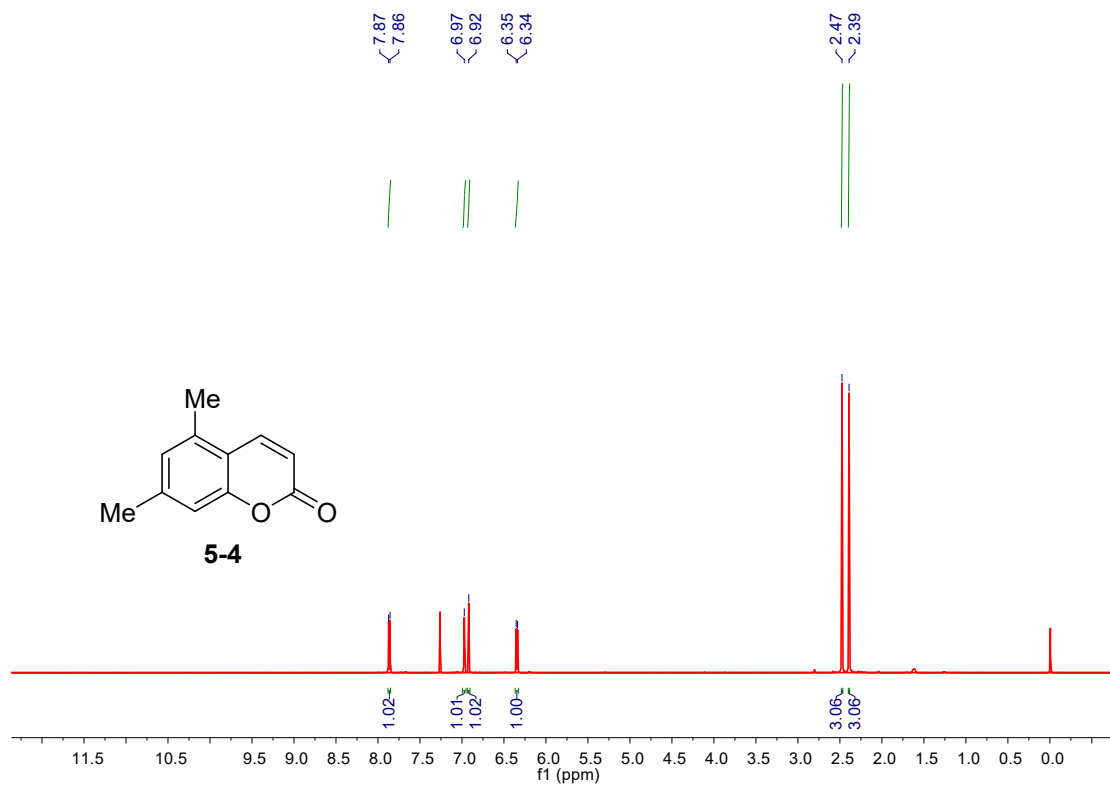

<sup>1</sup>H NMR (600 MHz, CDCl<sub>3</sub>)

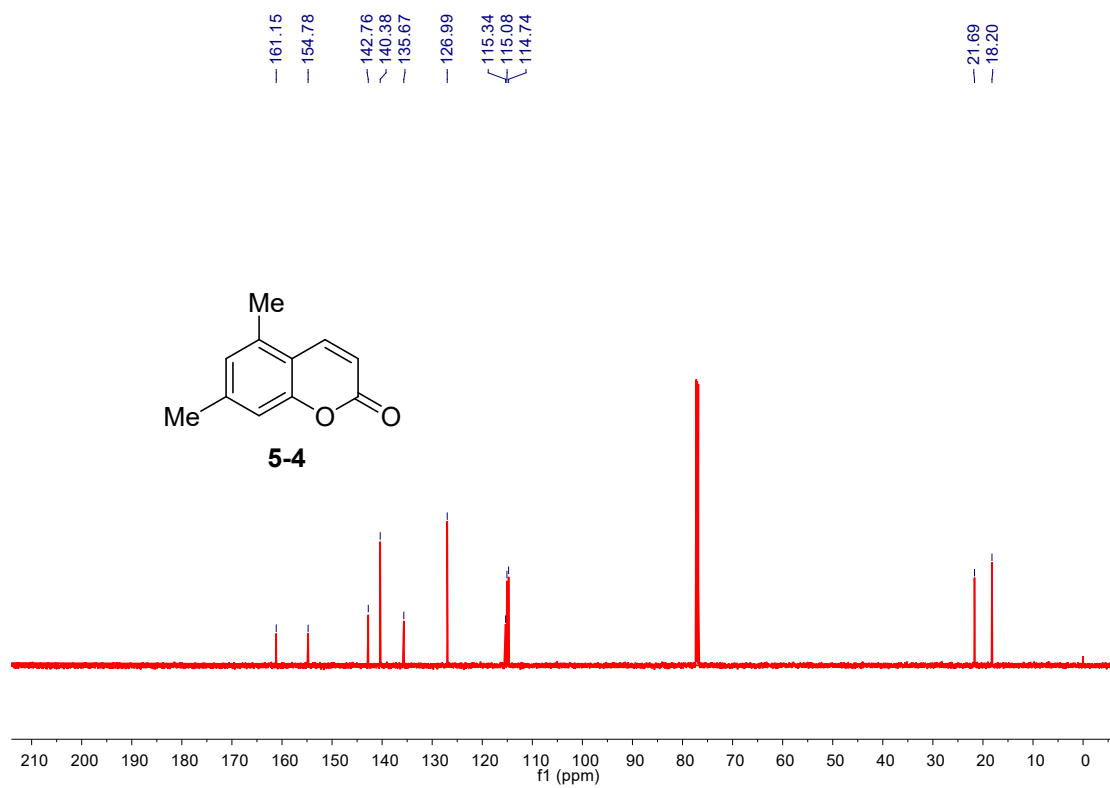

<sup>13</sup>C NMR (151 MHz, CDCl<sub>3</sub>)

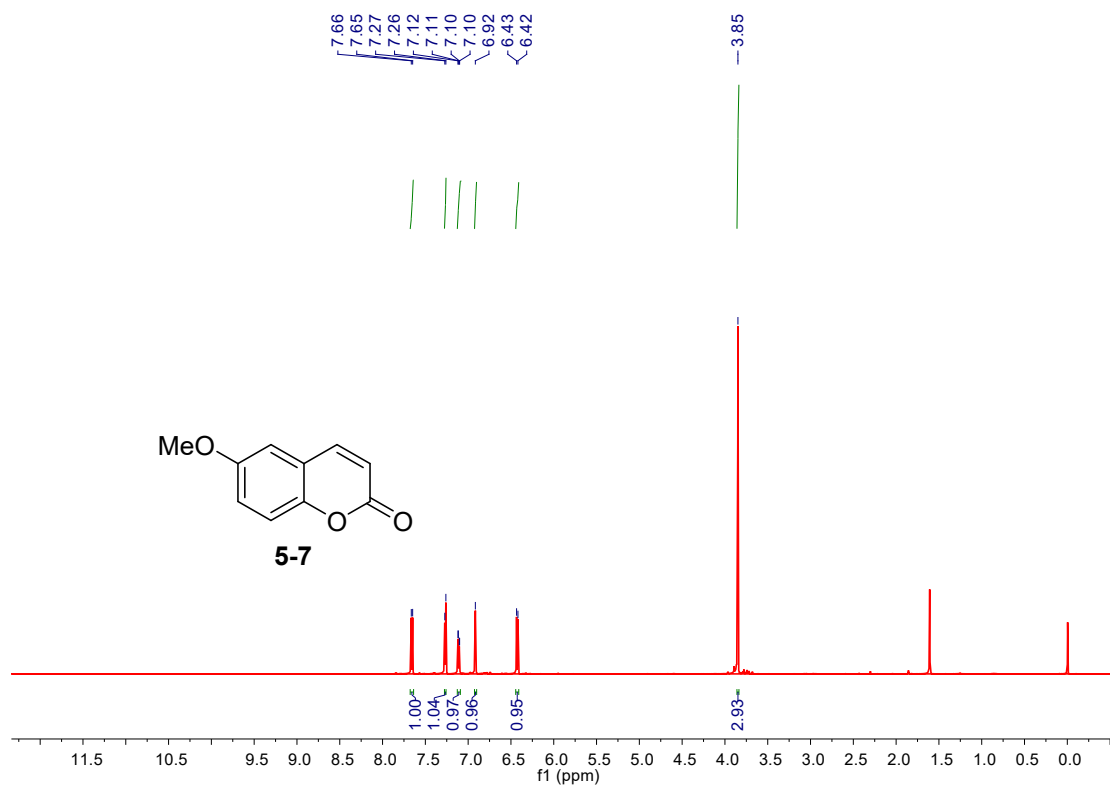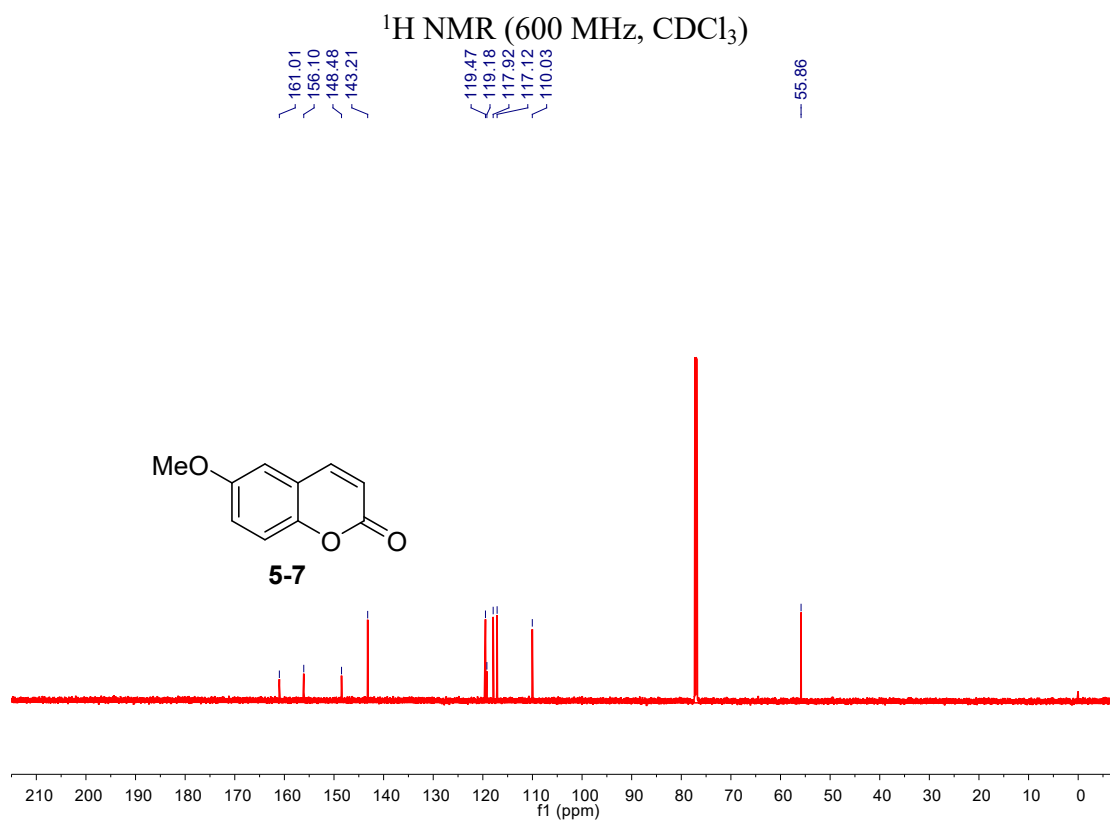

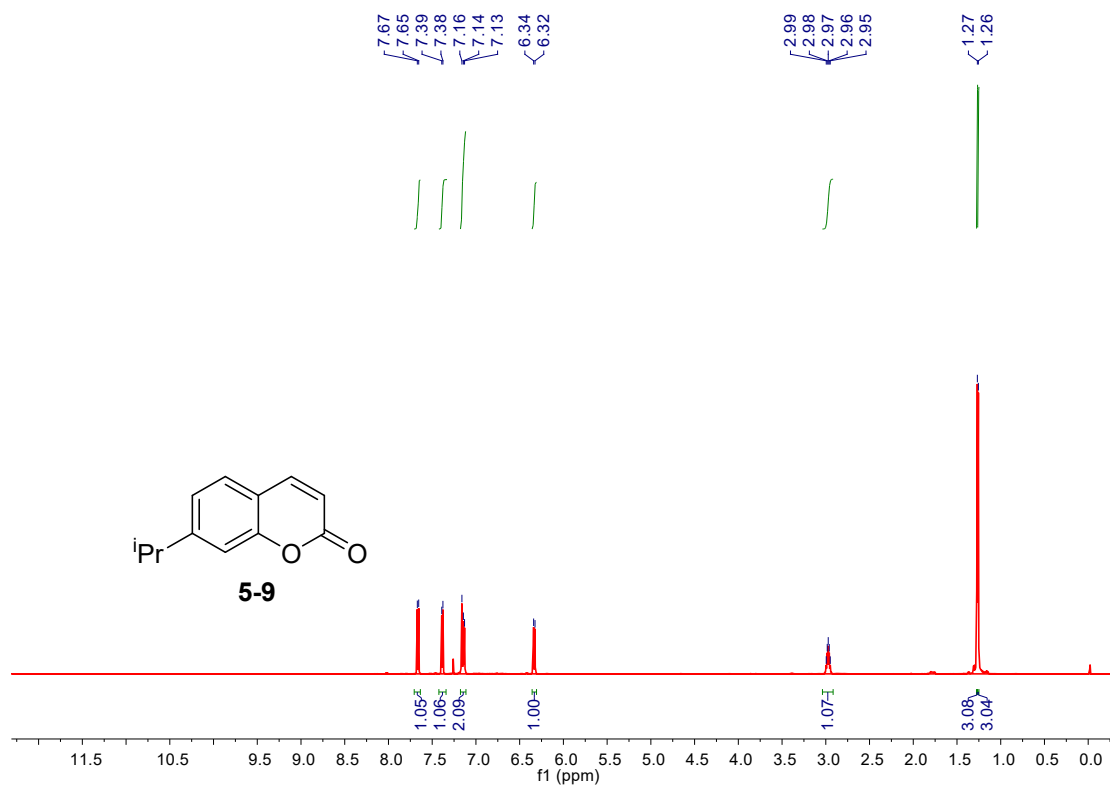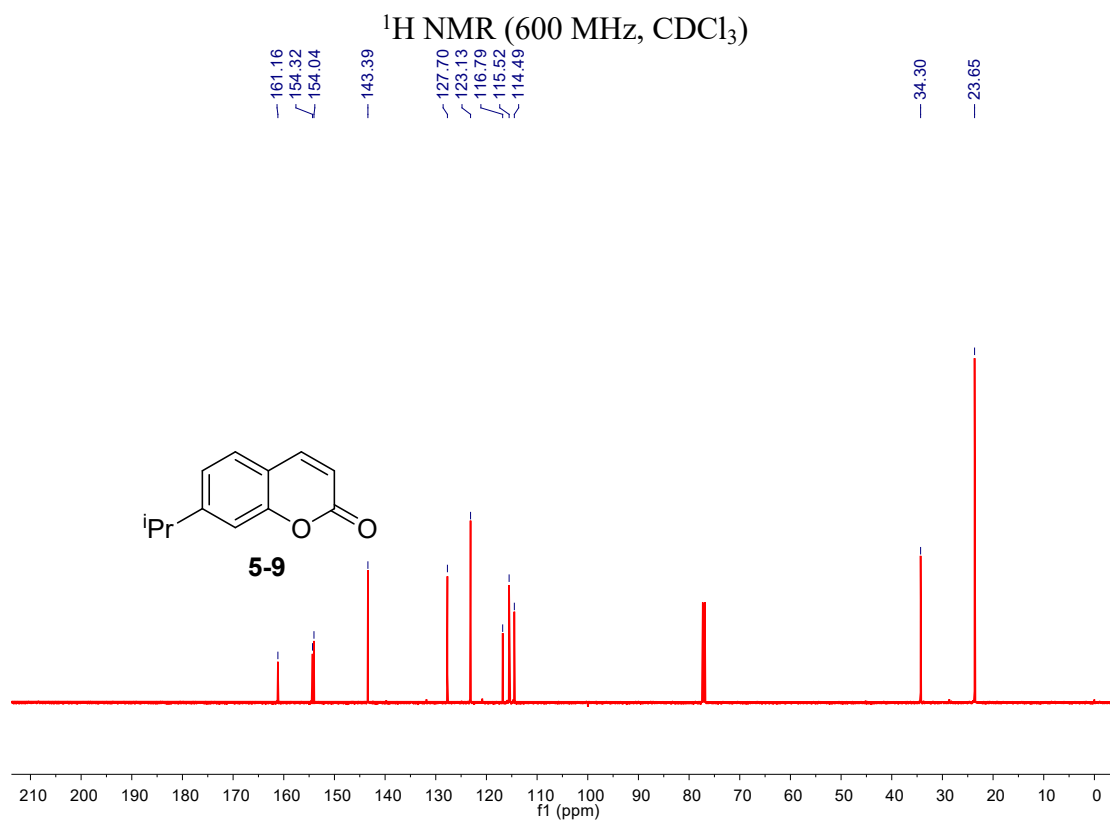



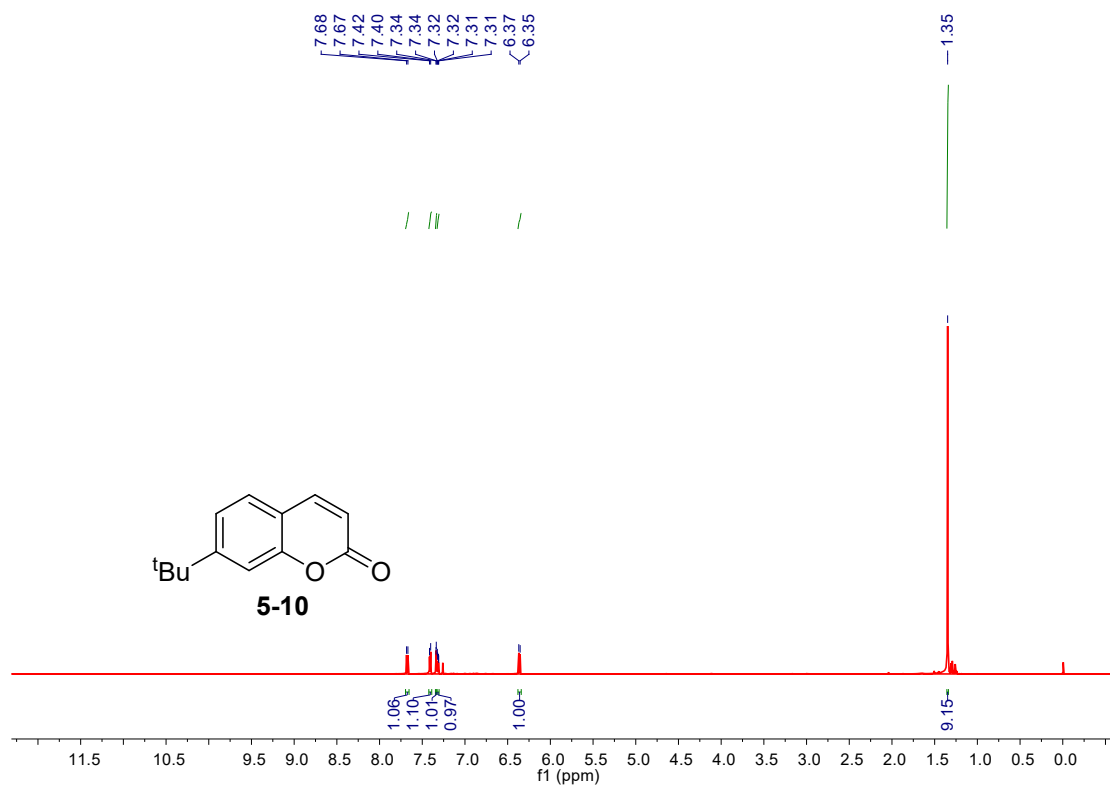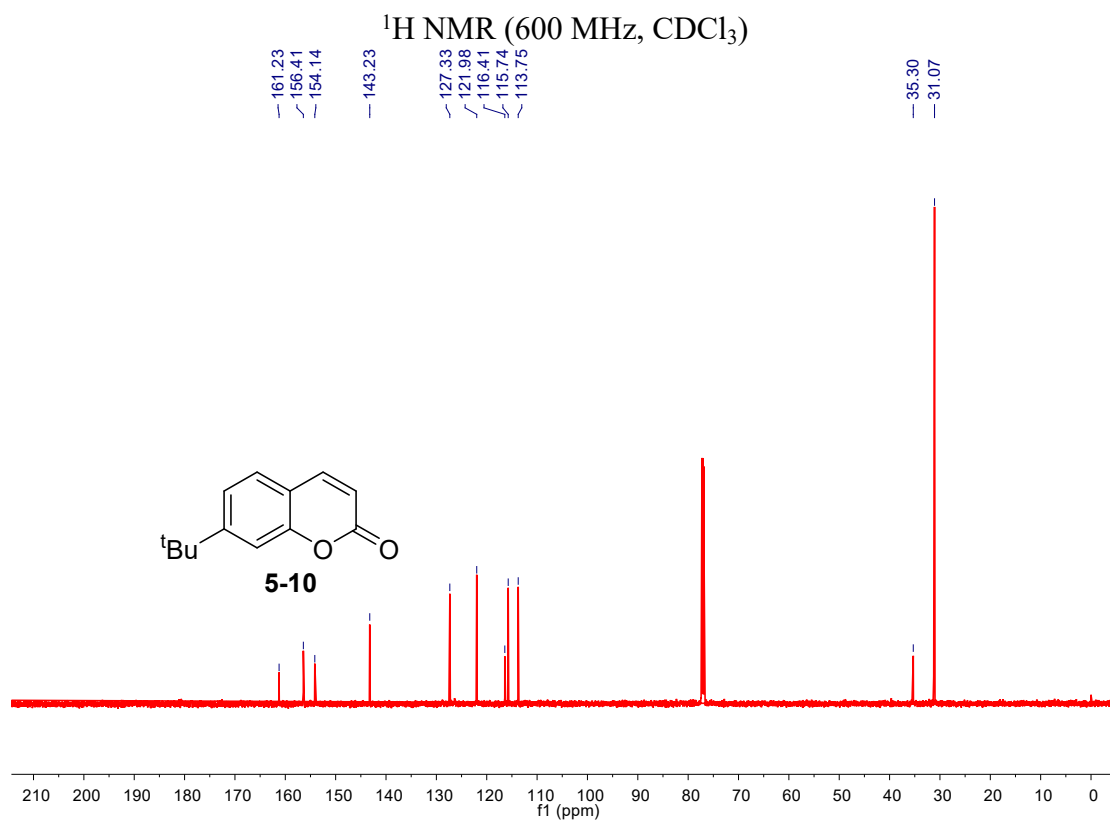

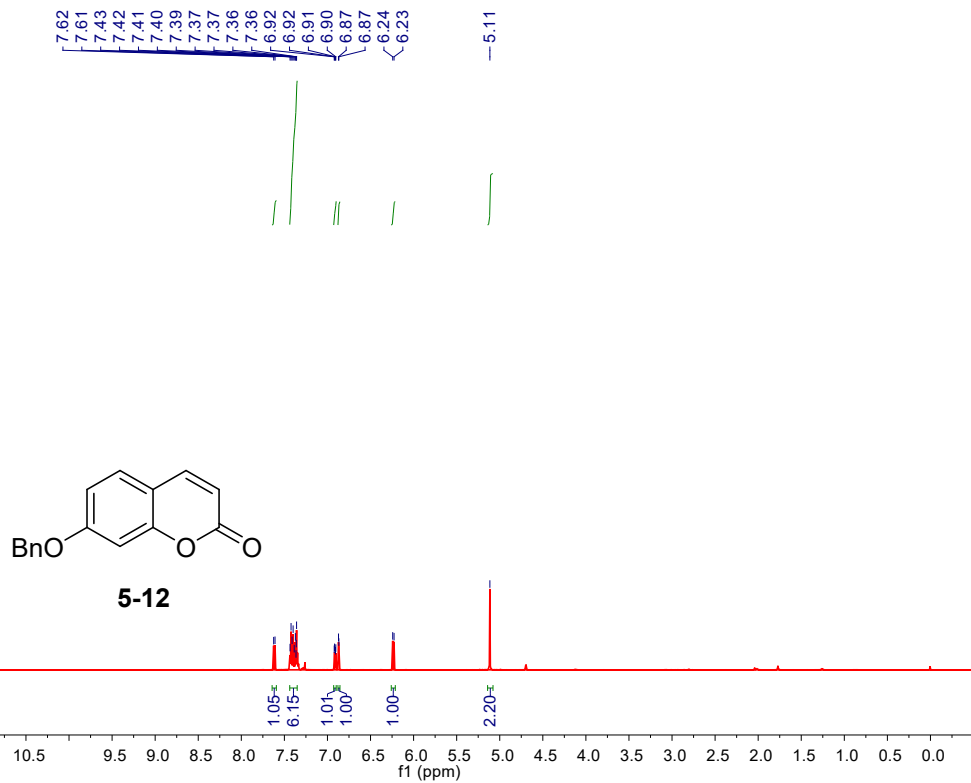

<sup>1</sup>H NMR (600 MHz, CDCl<sub>3</sub>)

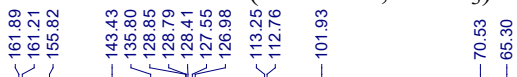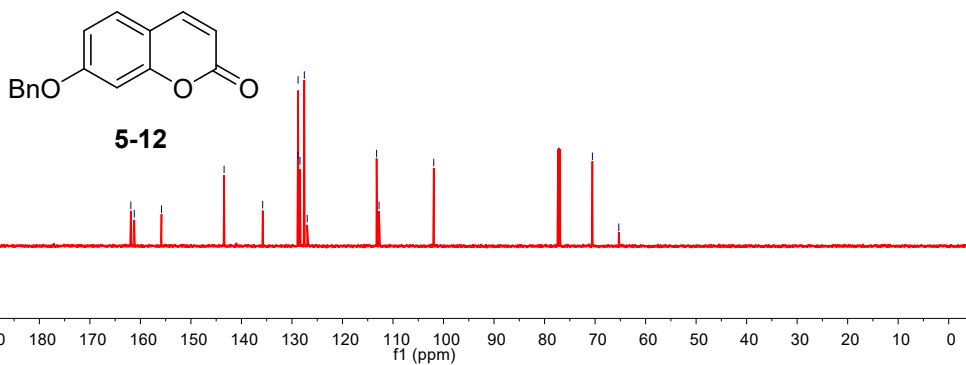

<sup>13</sup>C NMR (151 MHz, CDCl<sub>3</sub>)

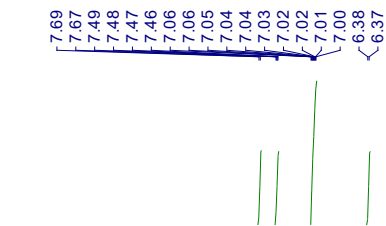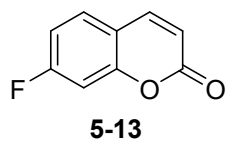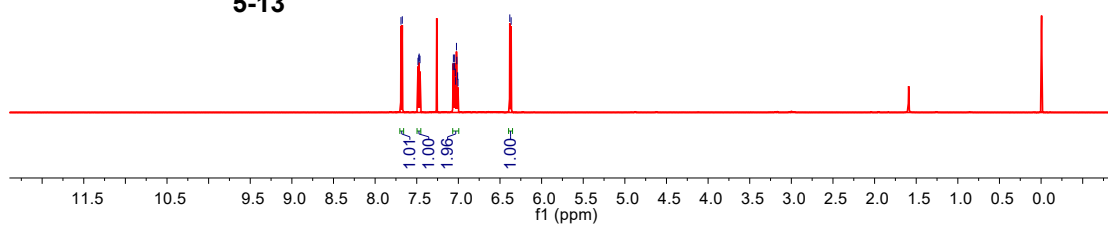

<sup>1</sup>H NMR (600 MHz, CDCl<sub>3</sub>)

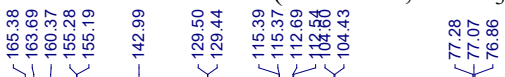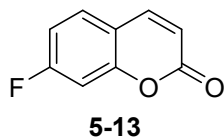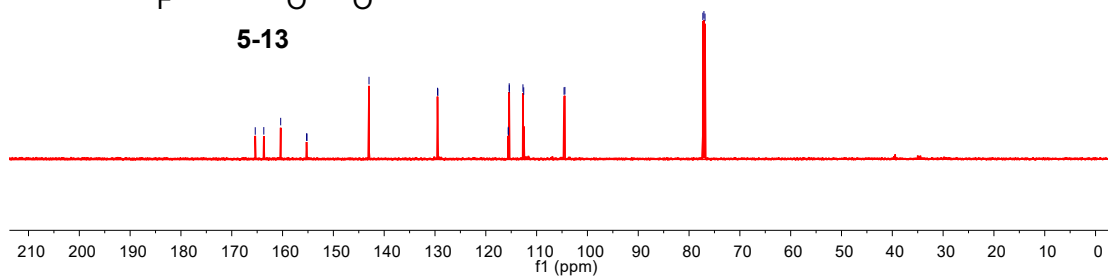

<sup>13</sup>C NMR (151 MHz, CDCl<sub>3</sub>)

-104.97

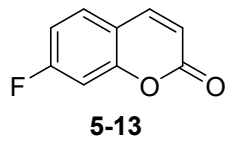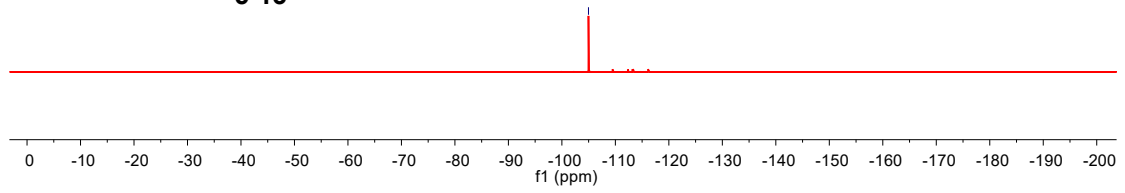

$^{19}\text{F}$  NMR (565 MHz,  $\text{CDCl}_3$ )

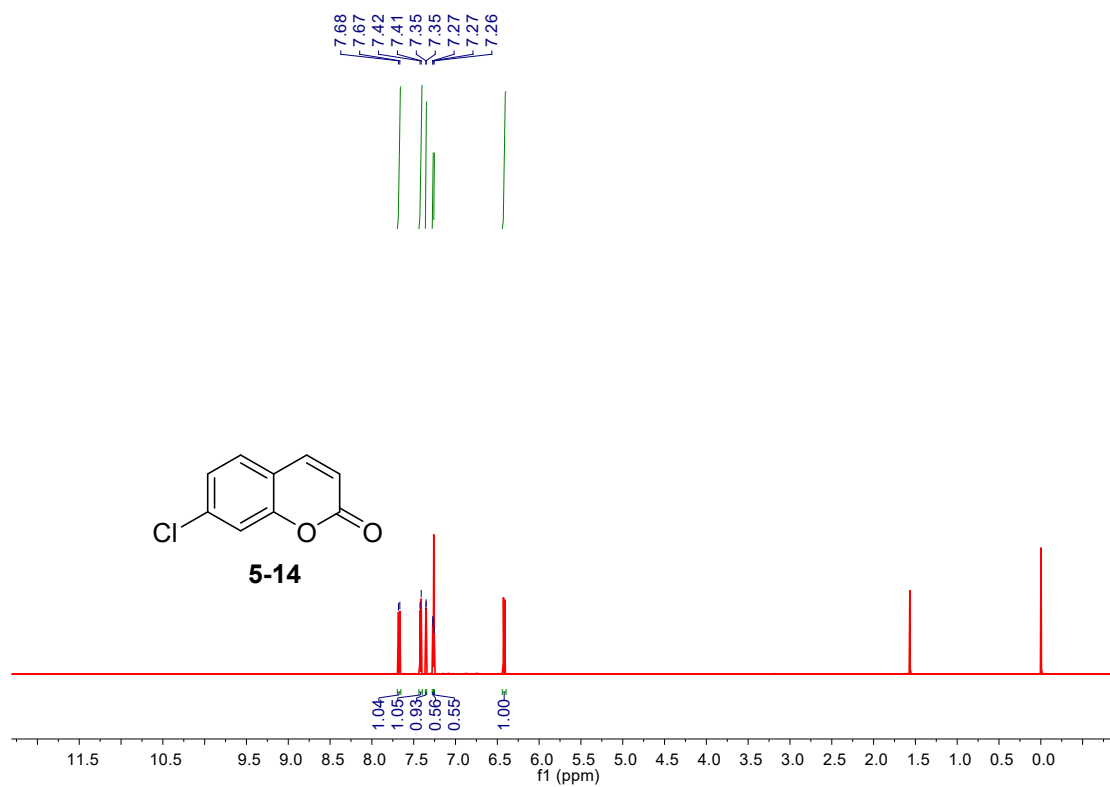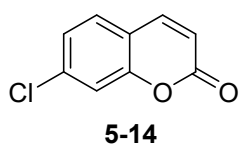

<sup>1</sup>H NMR (600 MHz, CDCl<sub>3</sub>)

— 159.96  
 — 154.38  
 — 142.64  
 — 137.85  
 — 128.64  
 — 125.06  
 — 117.42  
 — 117.29  
 — 116.67

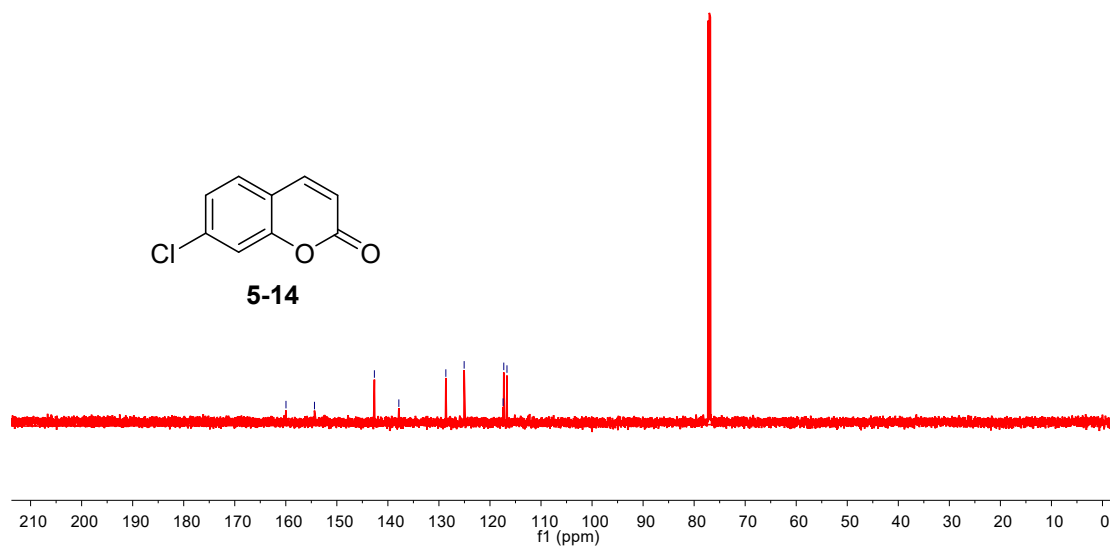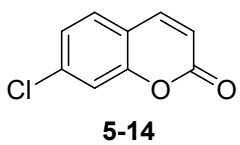

<sup>13</sup>C NMR (151 MHz, CDCl<sub>3</sub>)

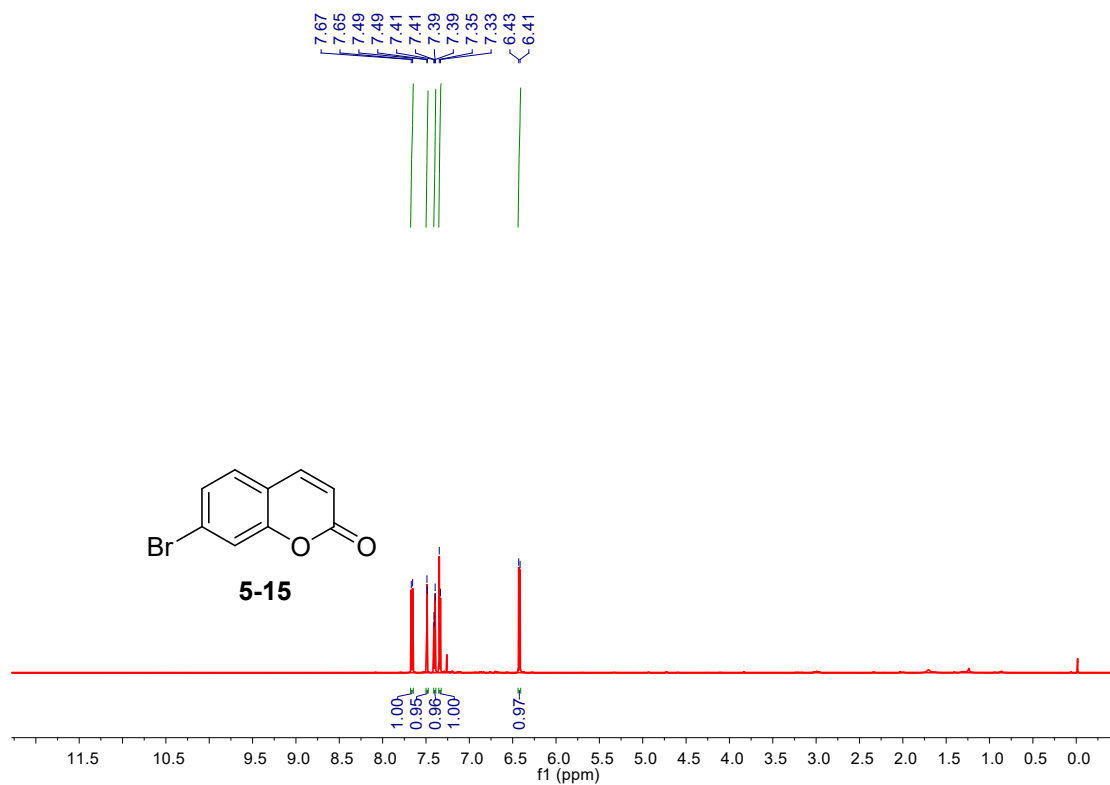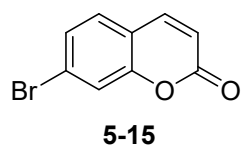

<sup>1</sup>H NMR (600 MHz, CDCl<sub>3</sub>)

— 159.93  
 — 154.28  
 — 142.79  
 — 128.81  
 — 127.91  
 — 125.82  
 — 120.20  
 — 117.76  
 — 116.88

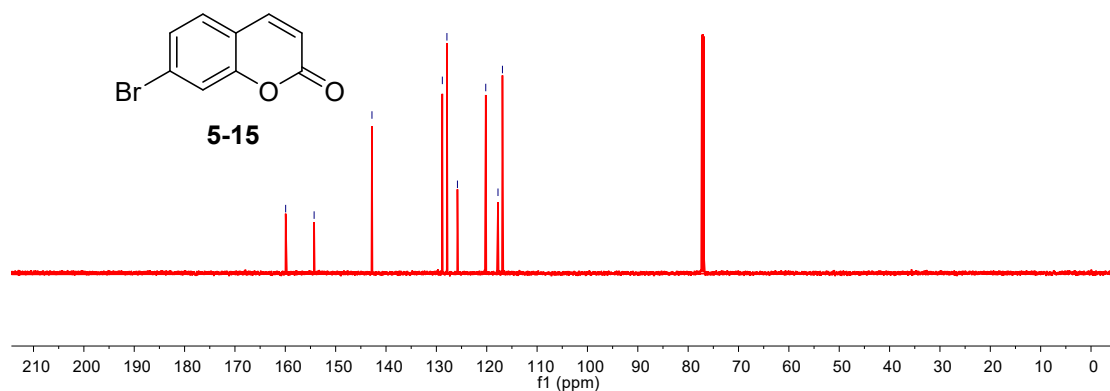

<sup>13</sup>C NMR (151 MHz, CDCl<sub>3</sub>)

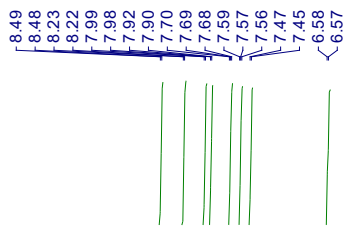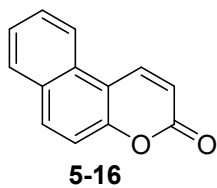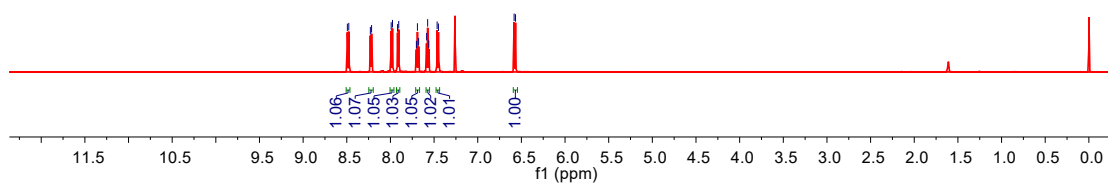

<sup>1</sup>H NMR (600 MHz, CDCl<sub>3</sub>)

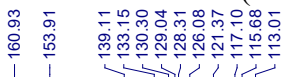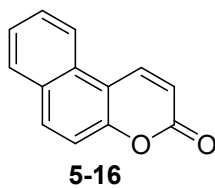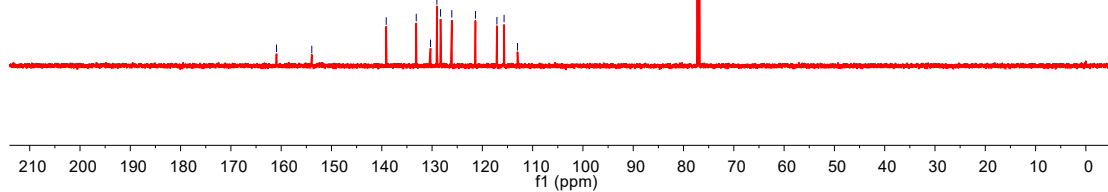

<sup>13</sup>C NMR (151 MHz, CDCl<sub>3</sub>)

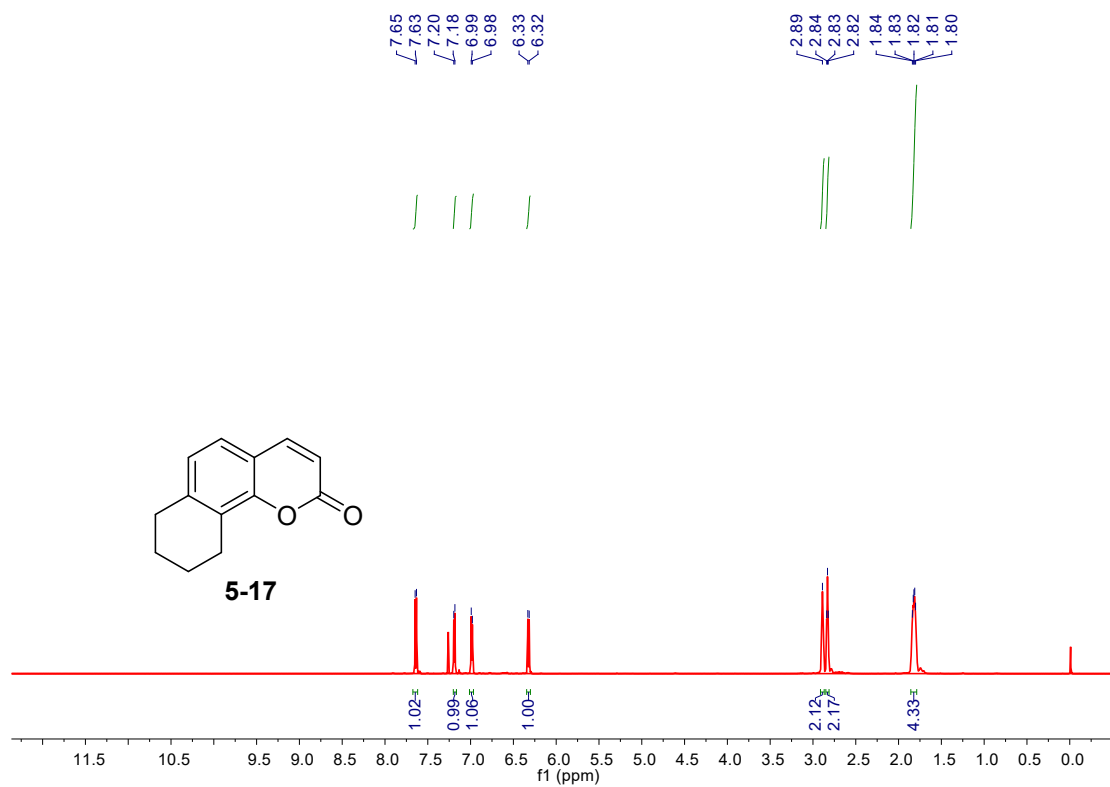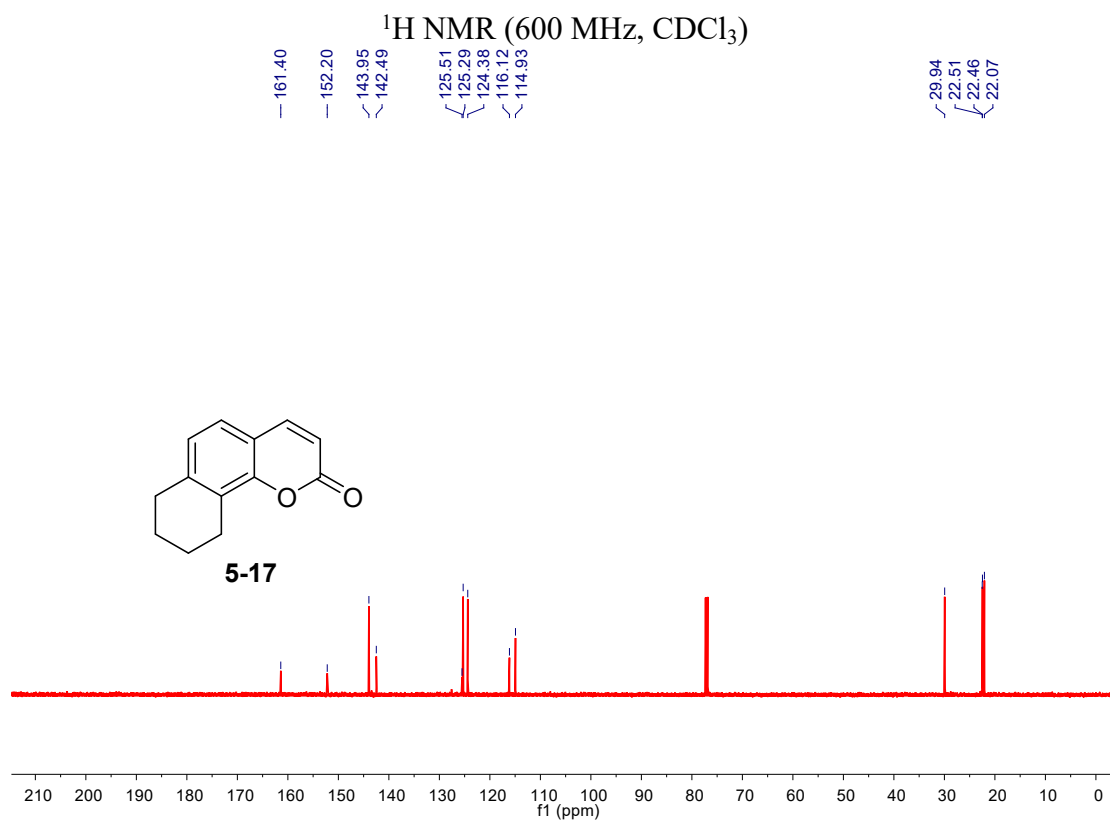



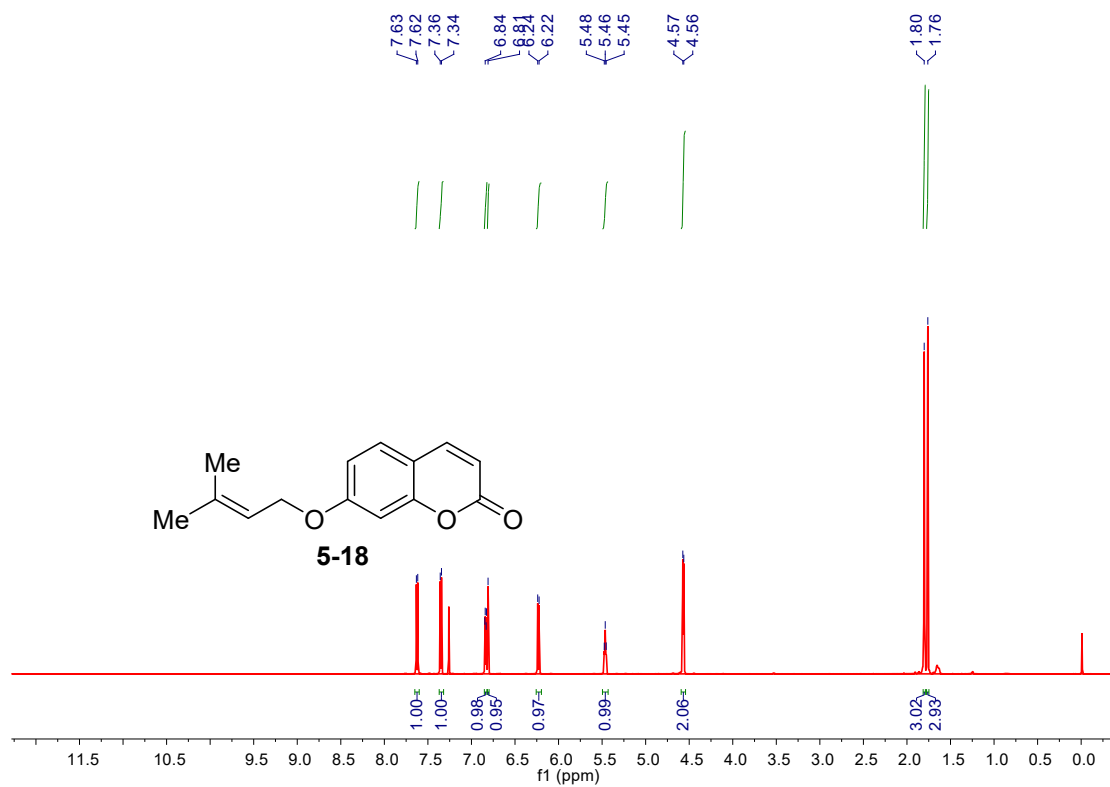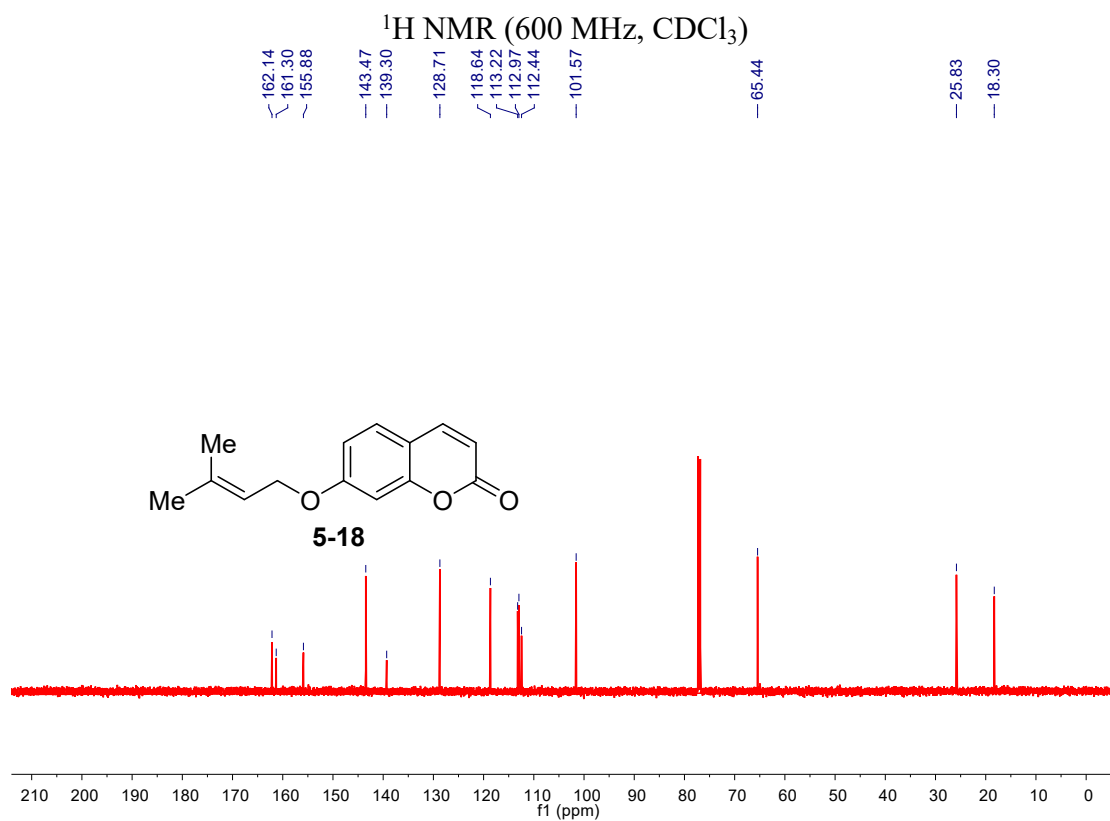

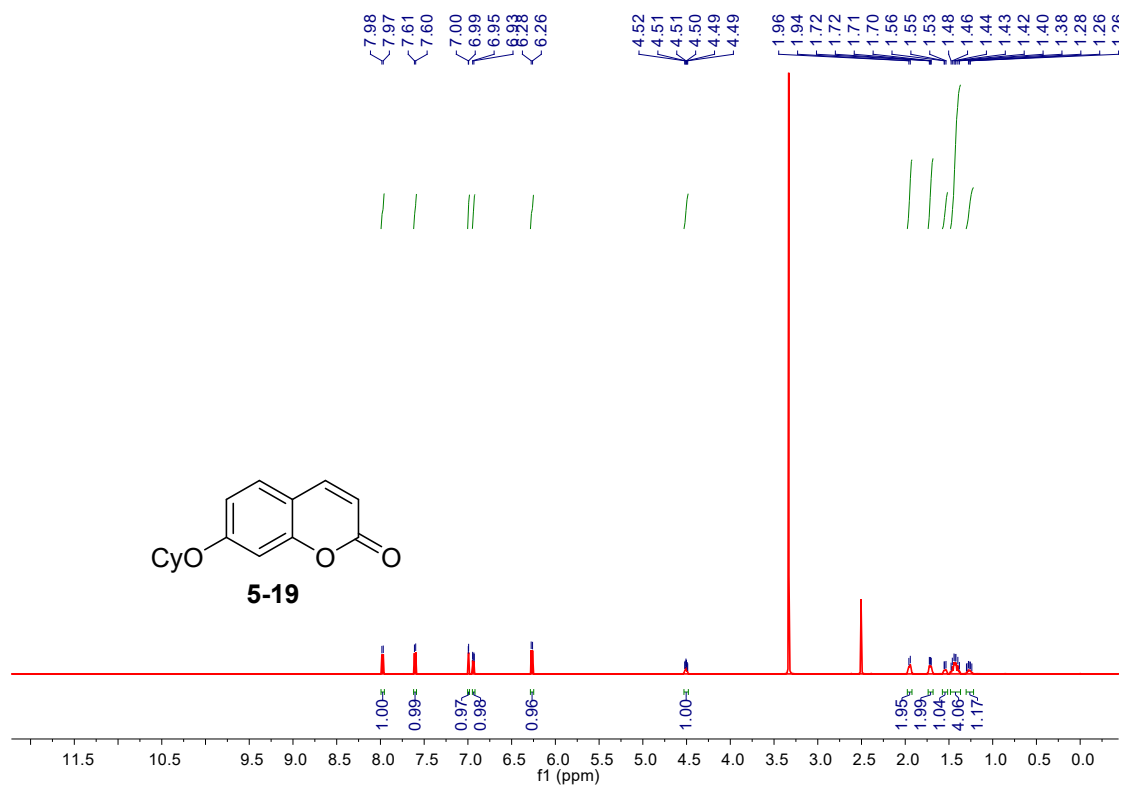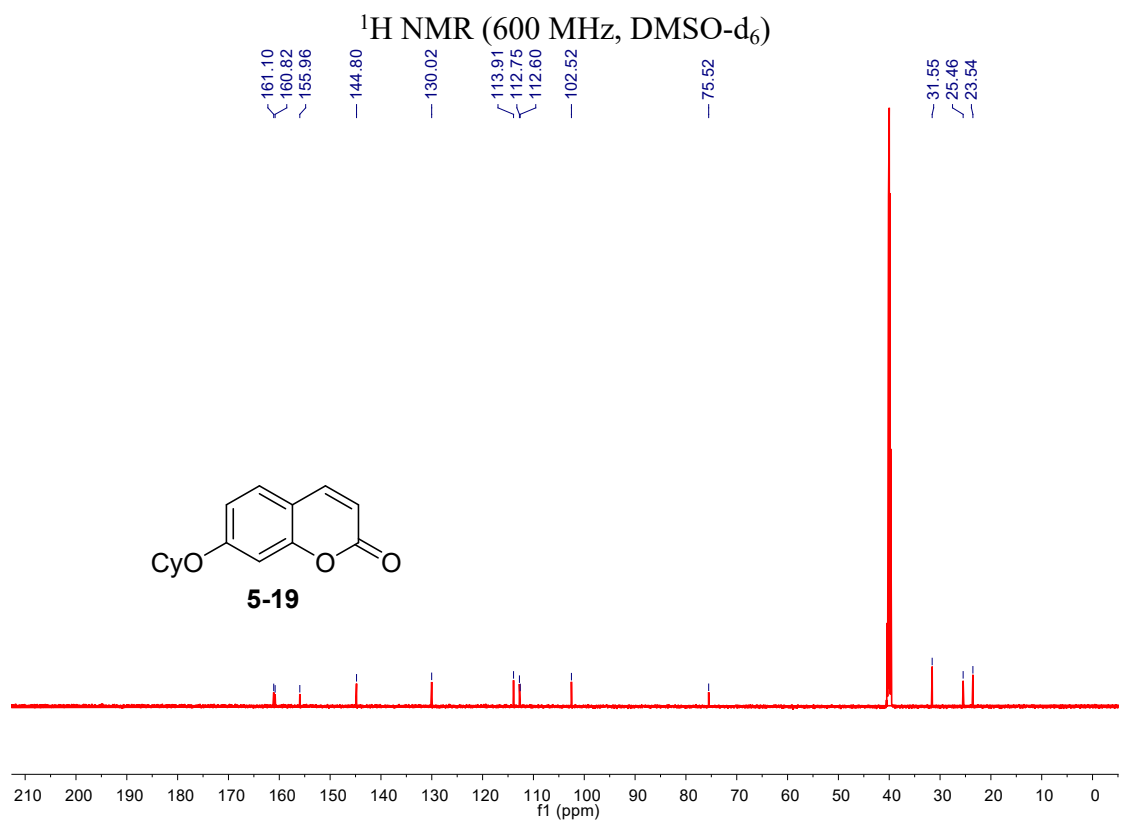

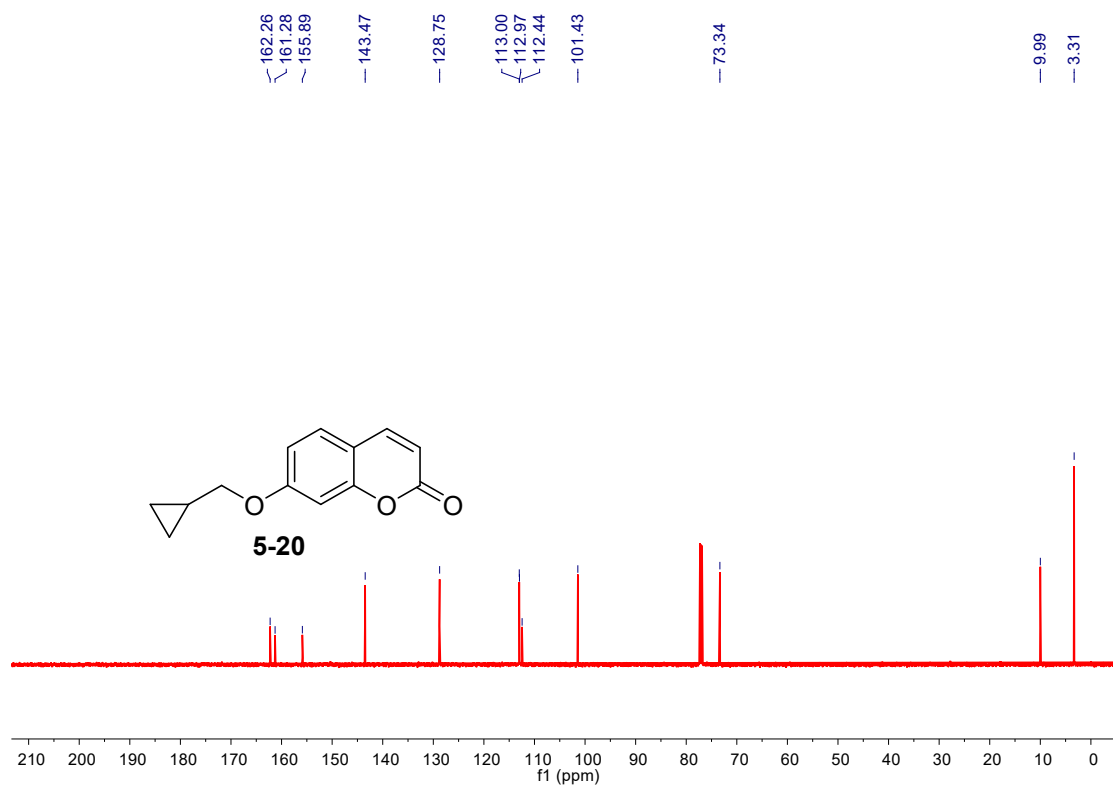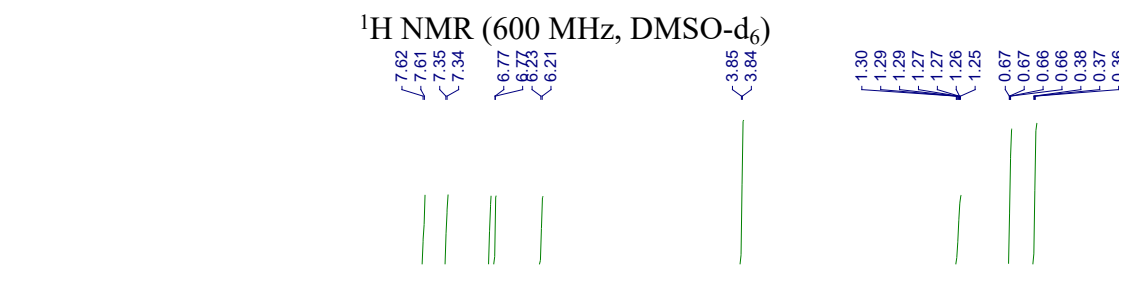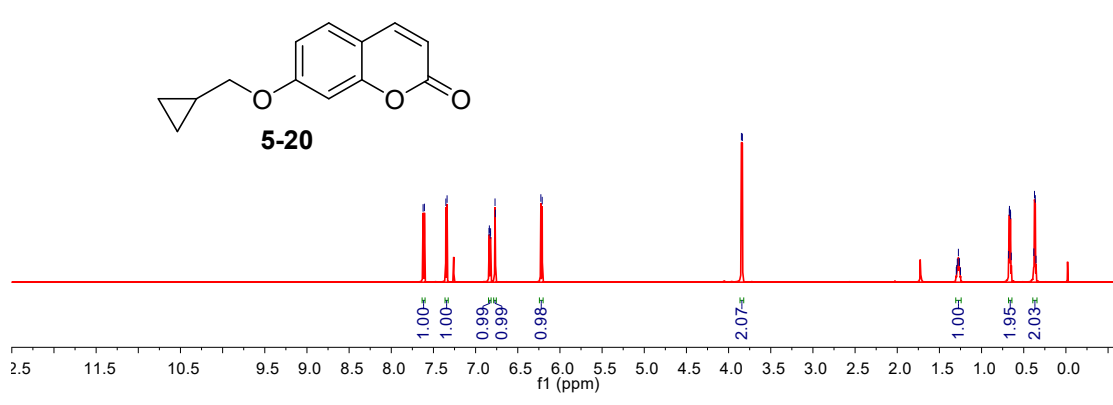

$^{13}\text{C}$  NMR (151 MHz,  $\text{CDCl}_3$ )

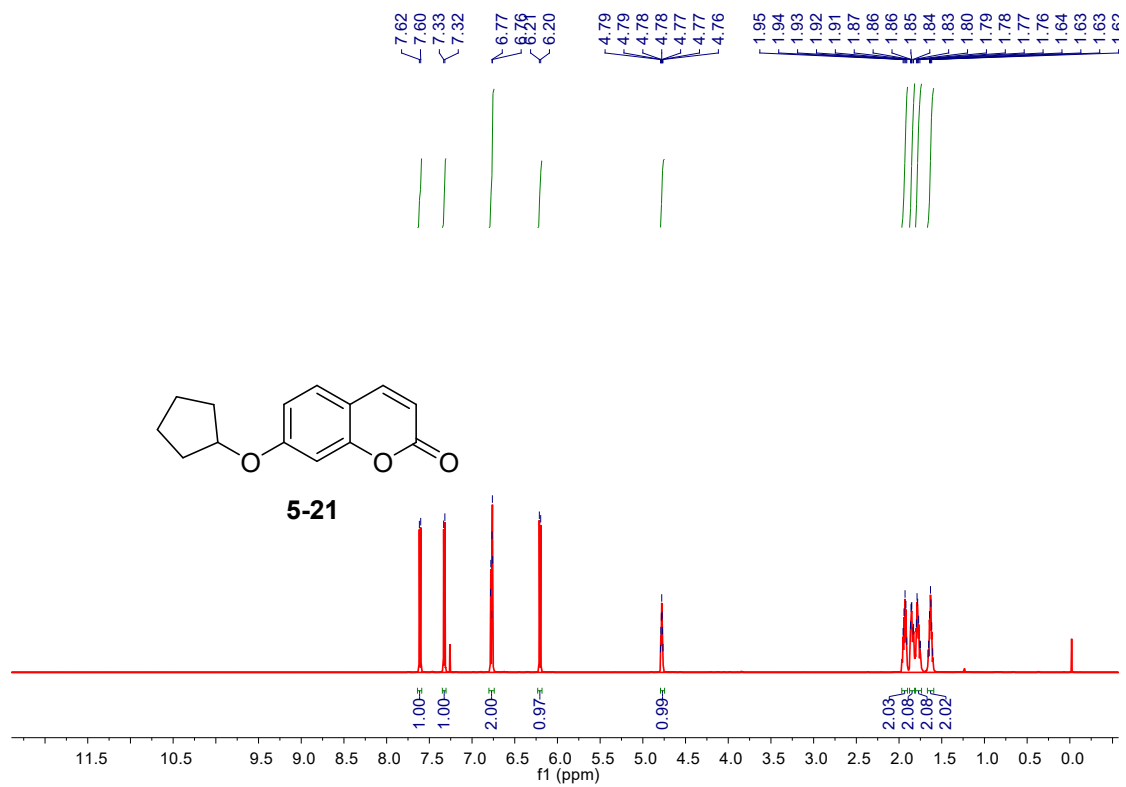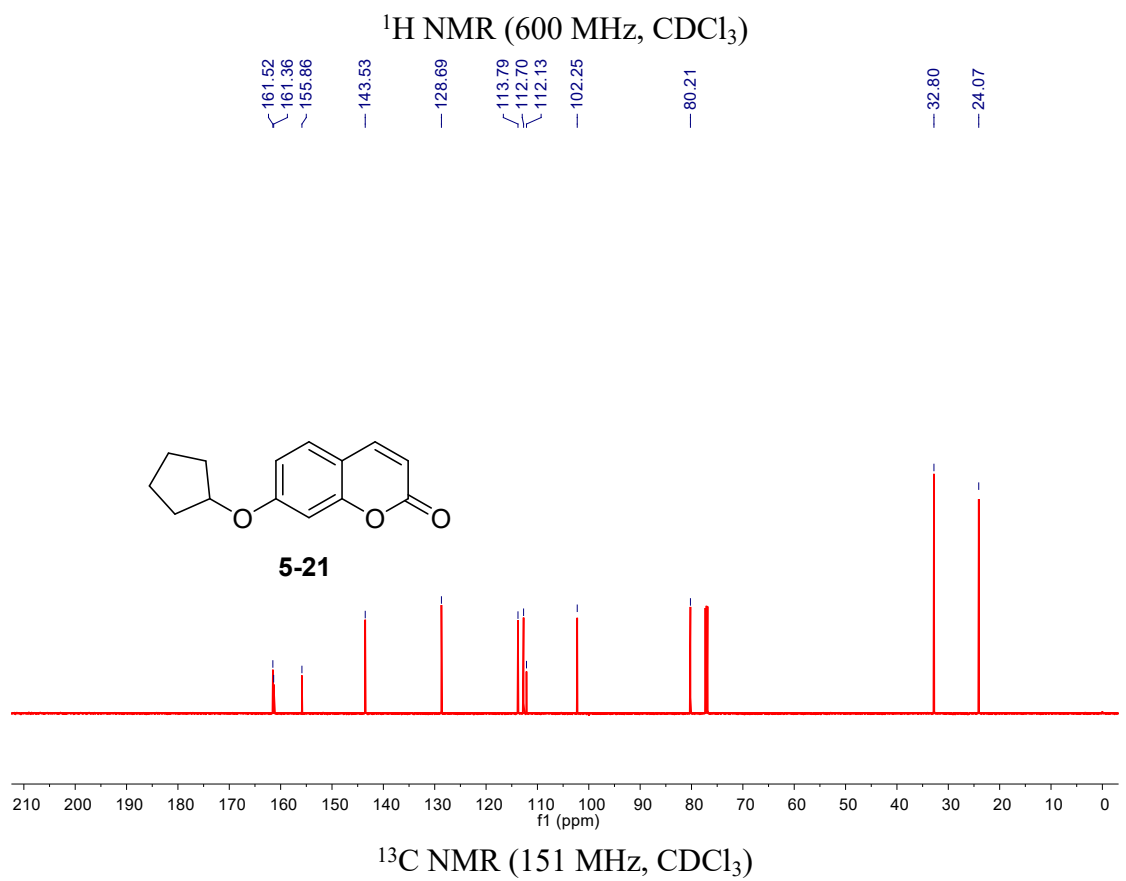

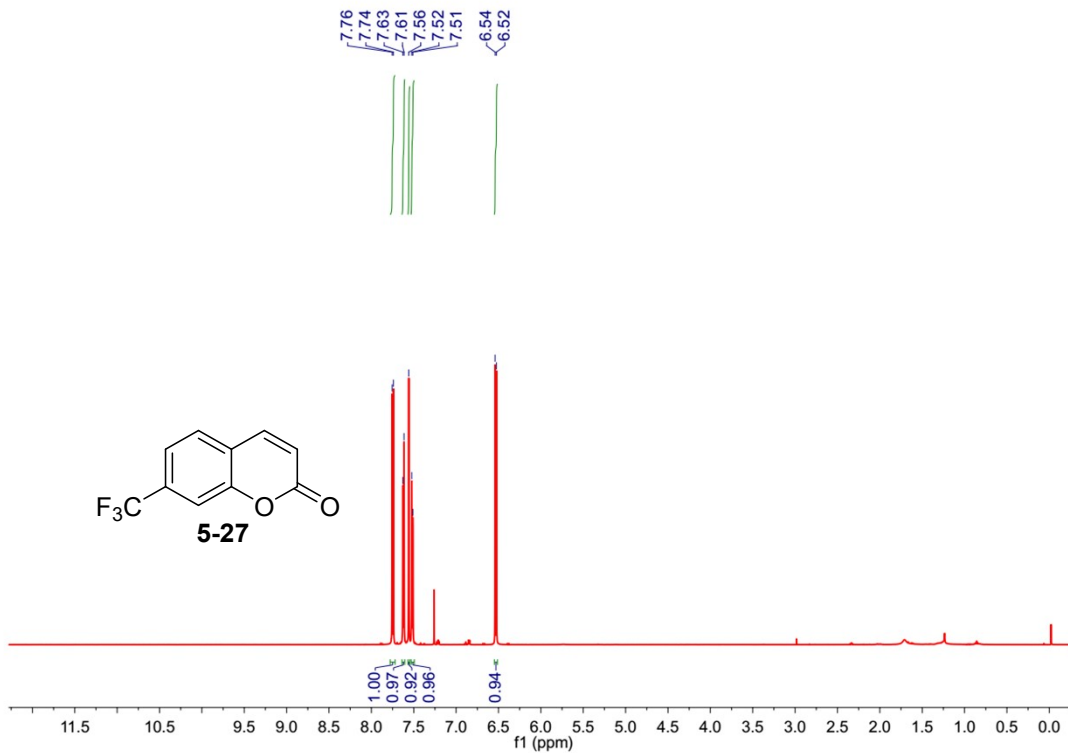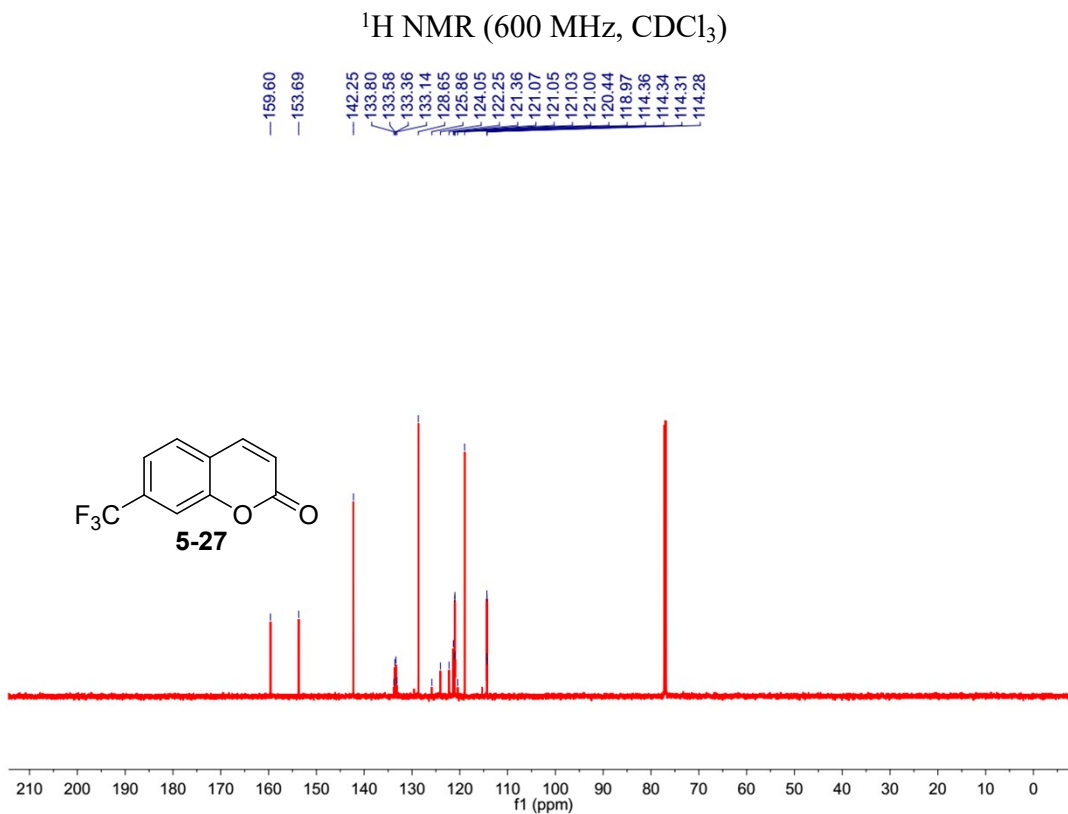

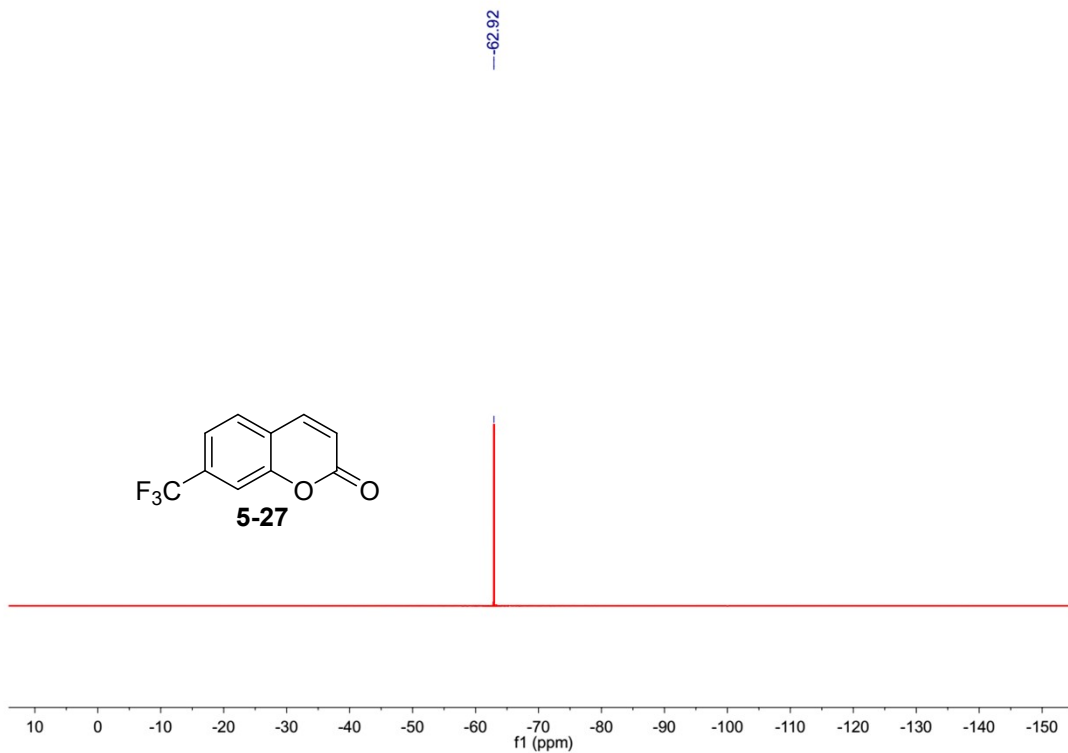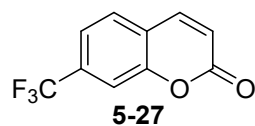

<sup>19</sup>F NMR (565 MHz, CDCl<sub>3</sub>)

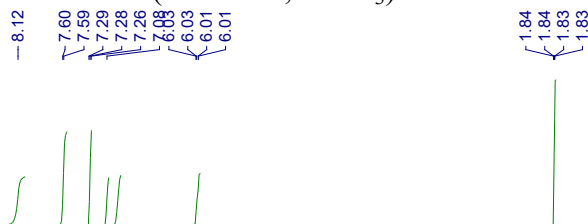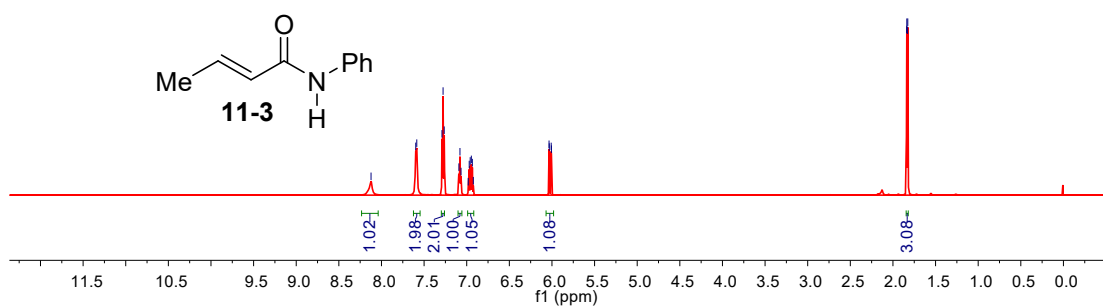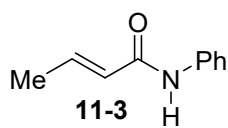

<sup>1</sup>H NMR (600 MHz, CDCl<sub>3</sub>)

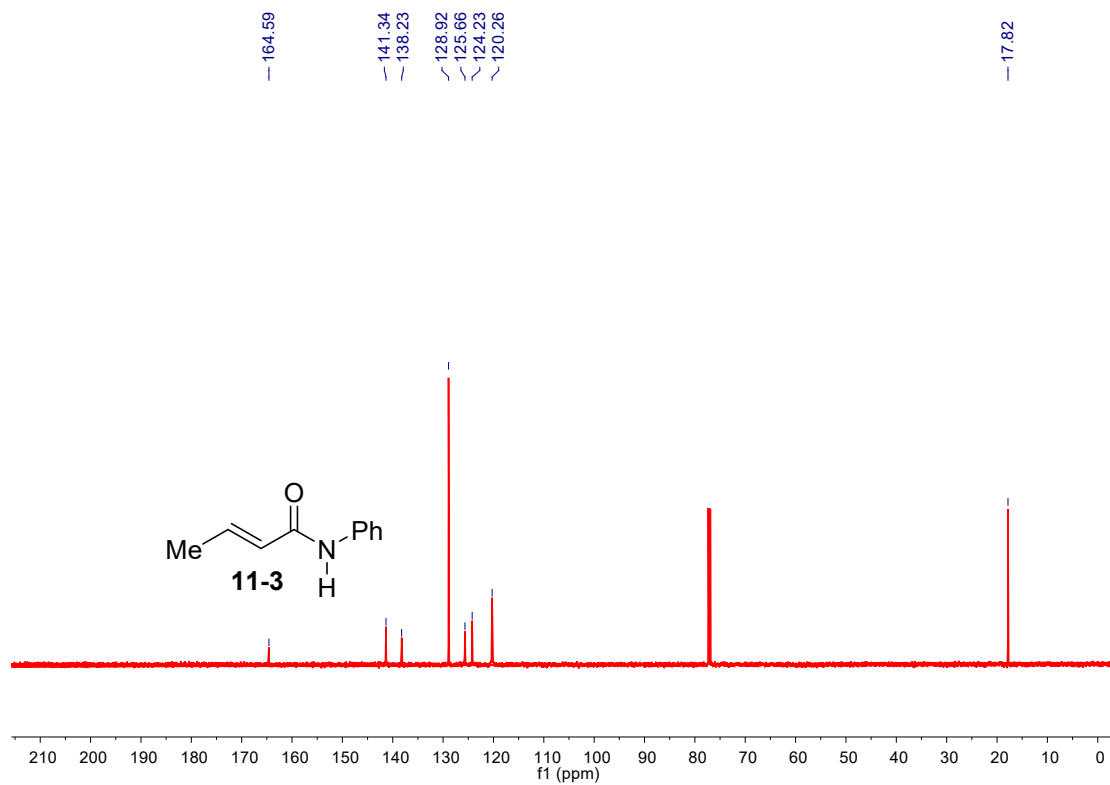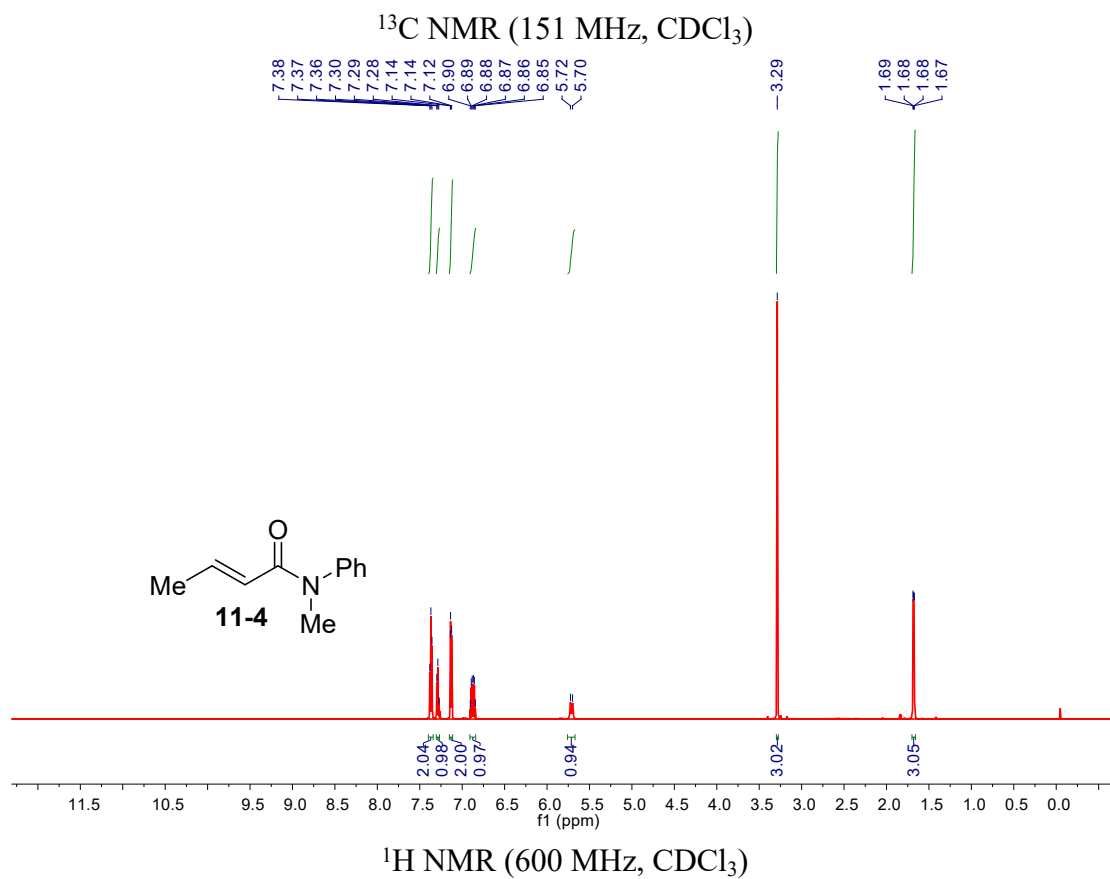

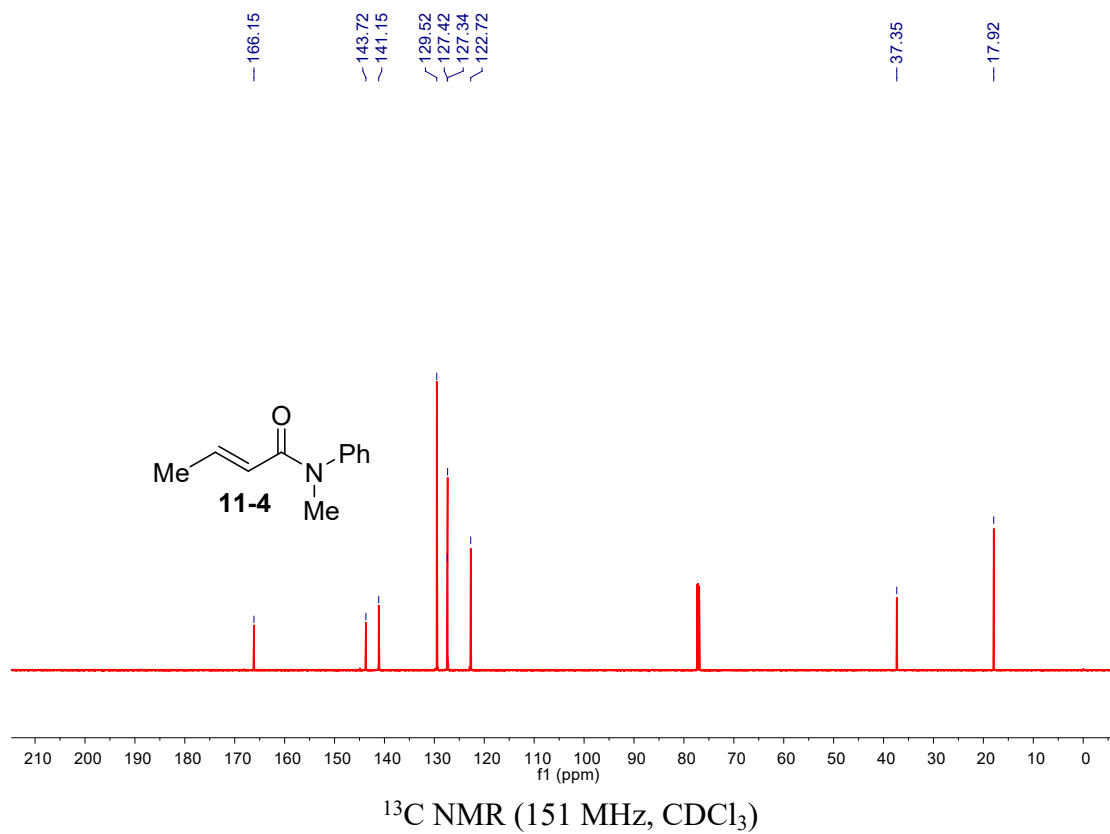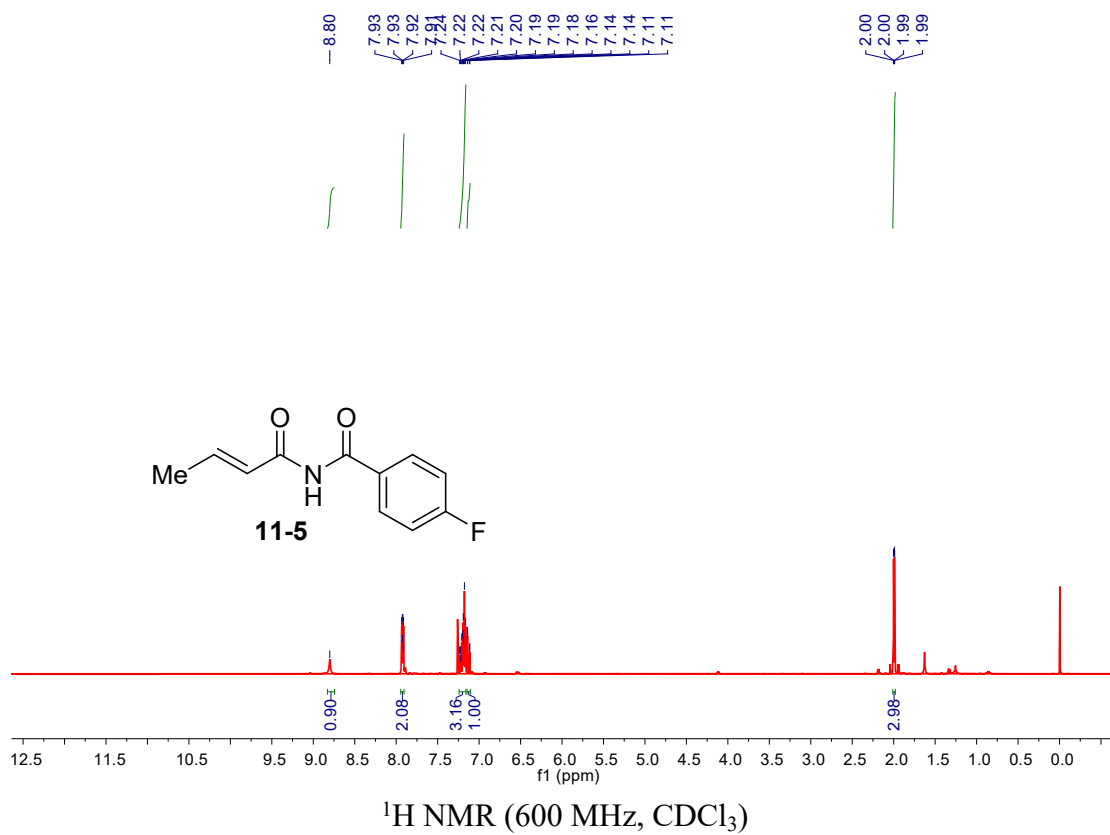



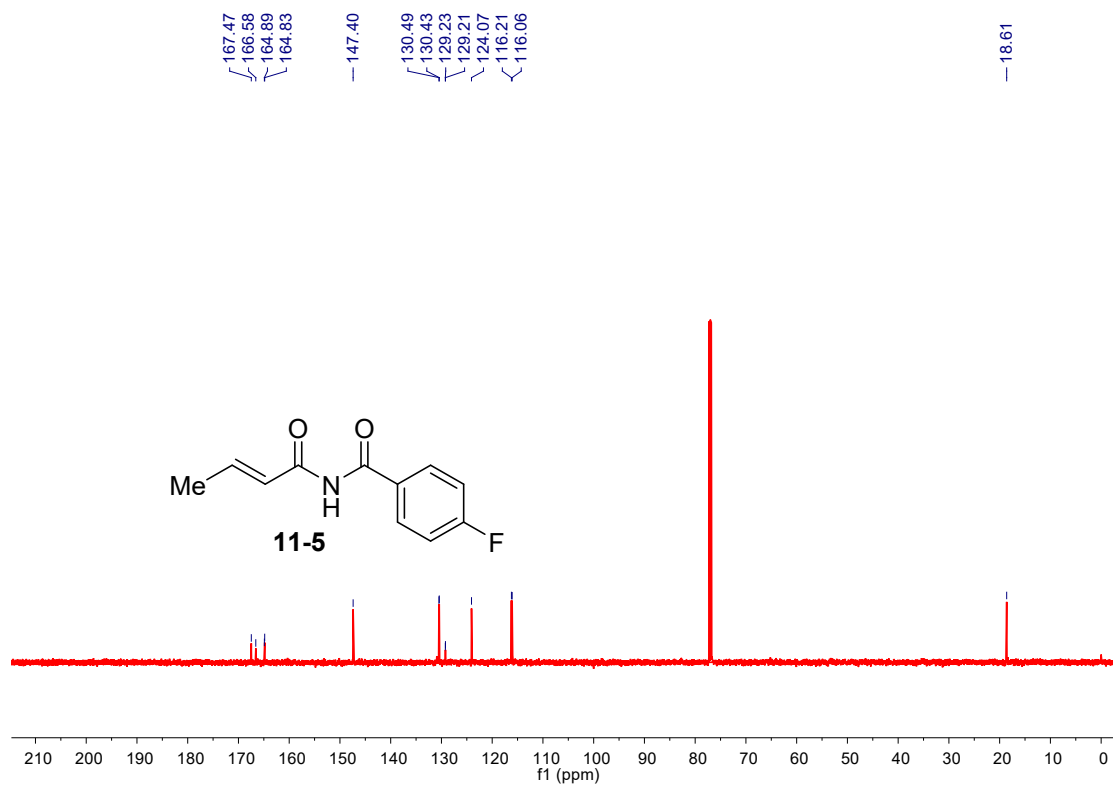

$^{13}\text{C}$  NMR (151 MHz,  $\text{CDCl}_3$ )

104.88

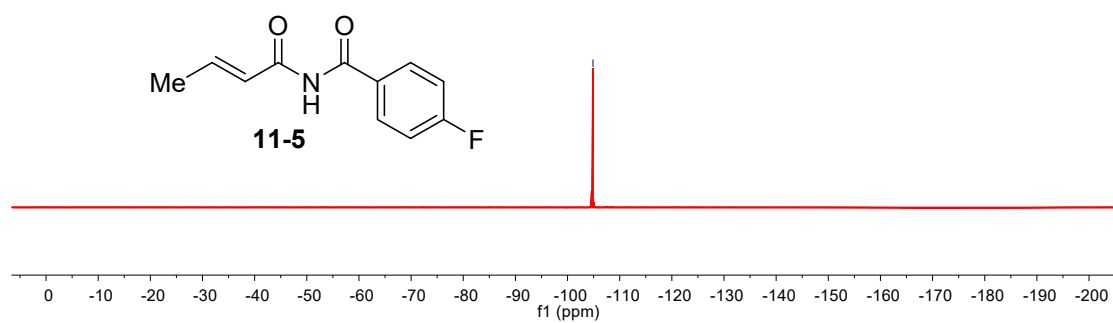

$^{19}\text{F}$  NMR (565 MHz,  $\text{CDCl}_3$ )

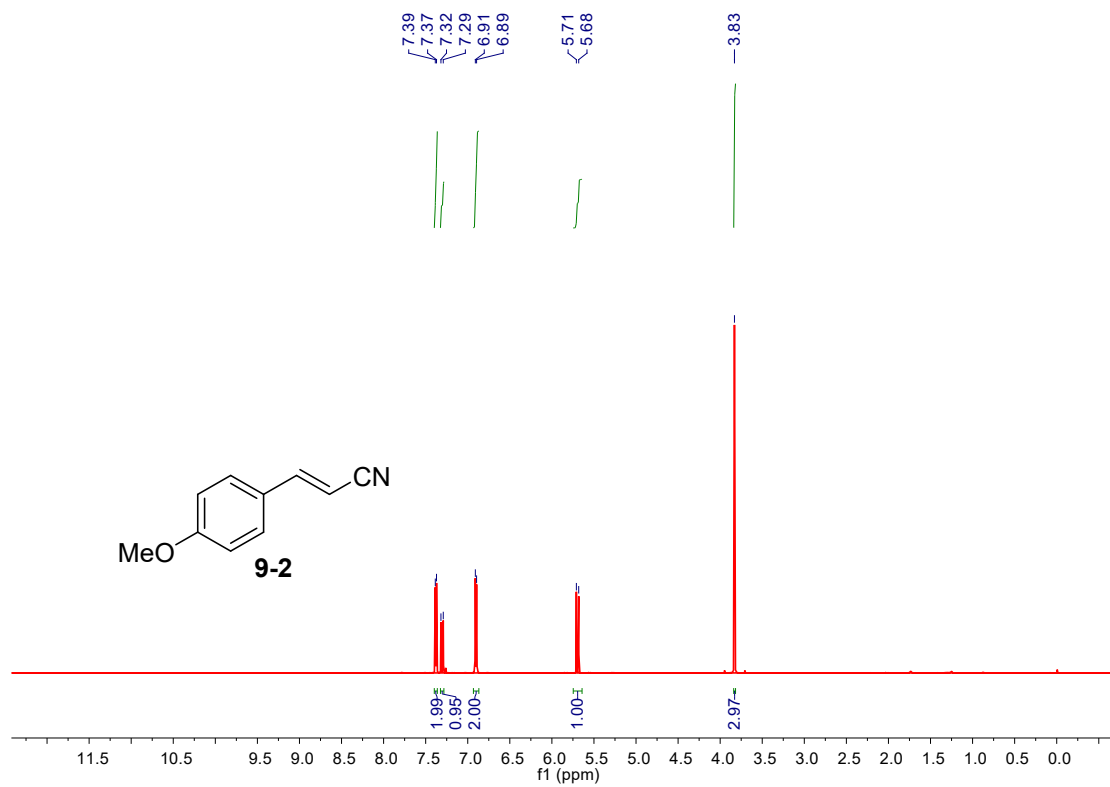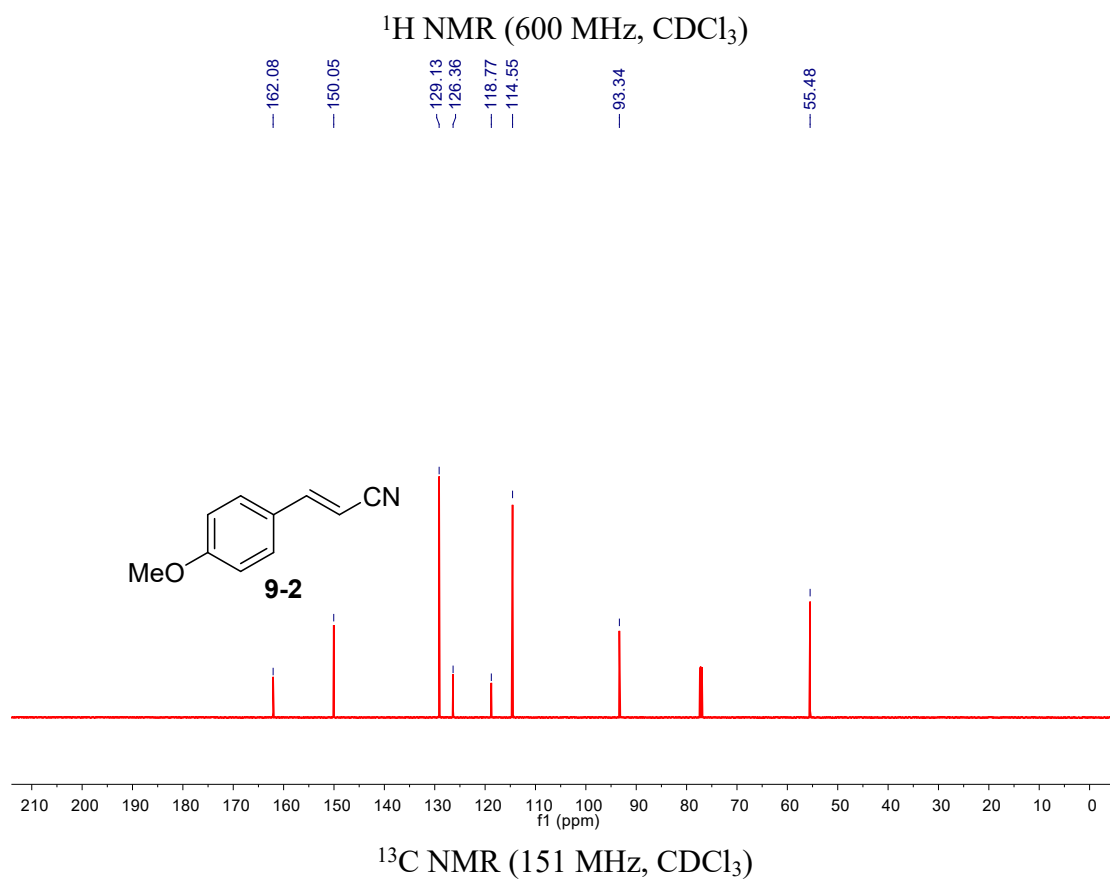

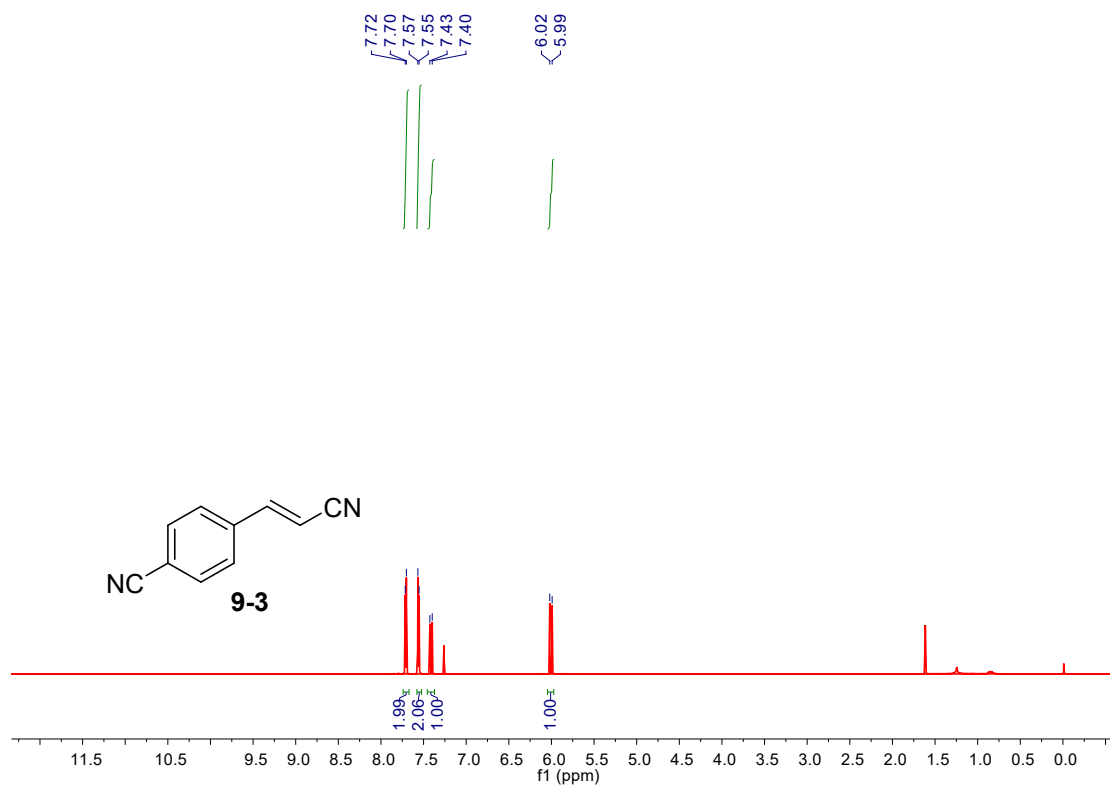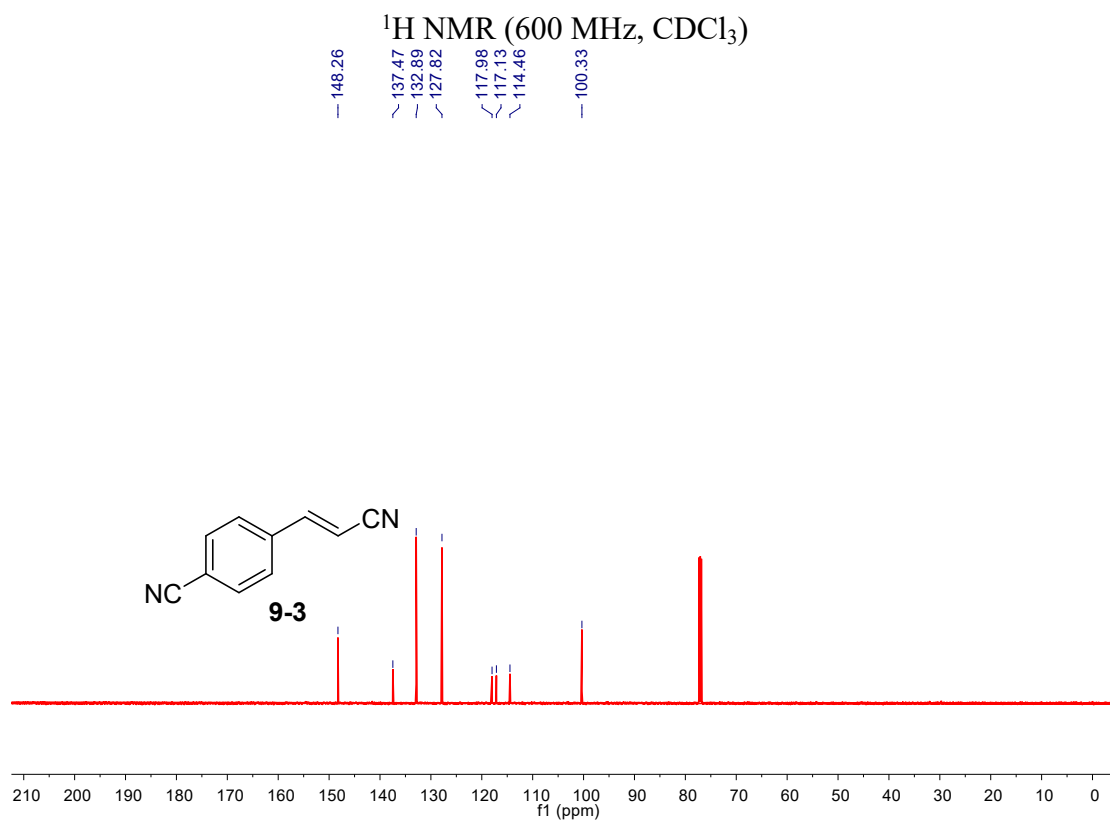

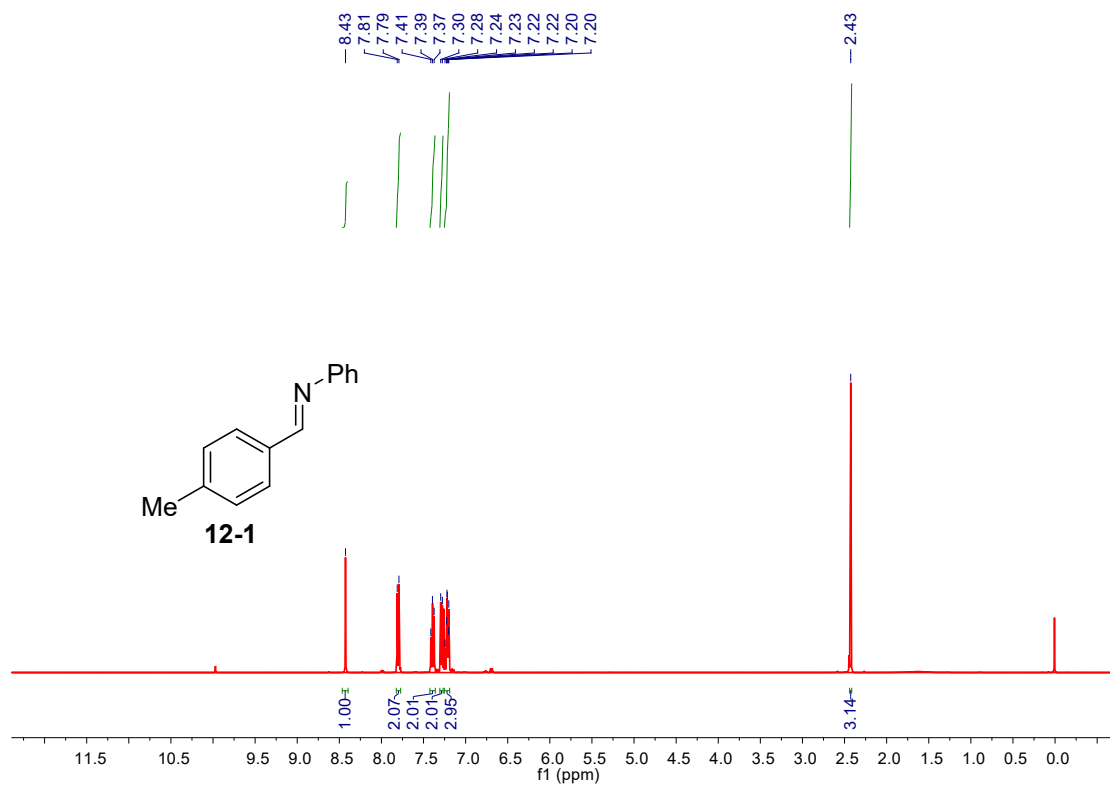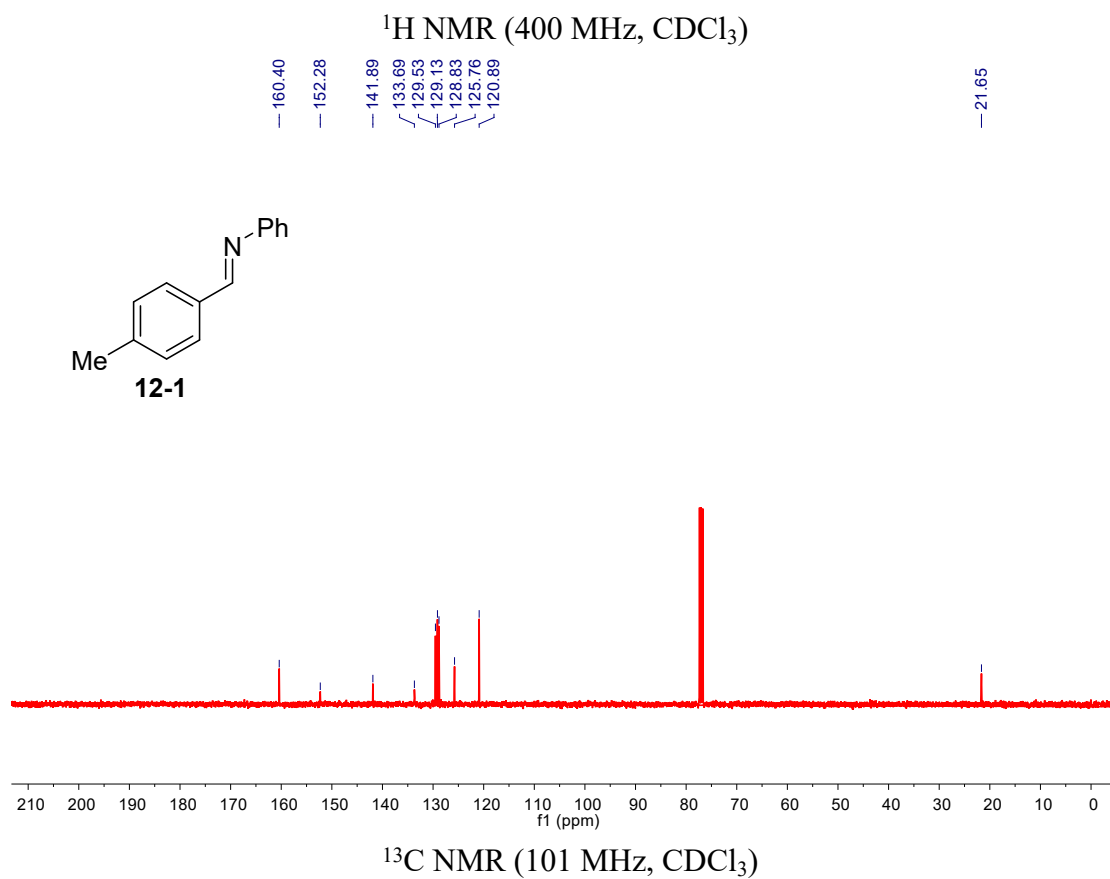

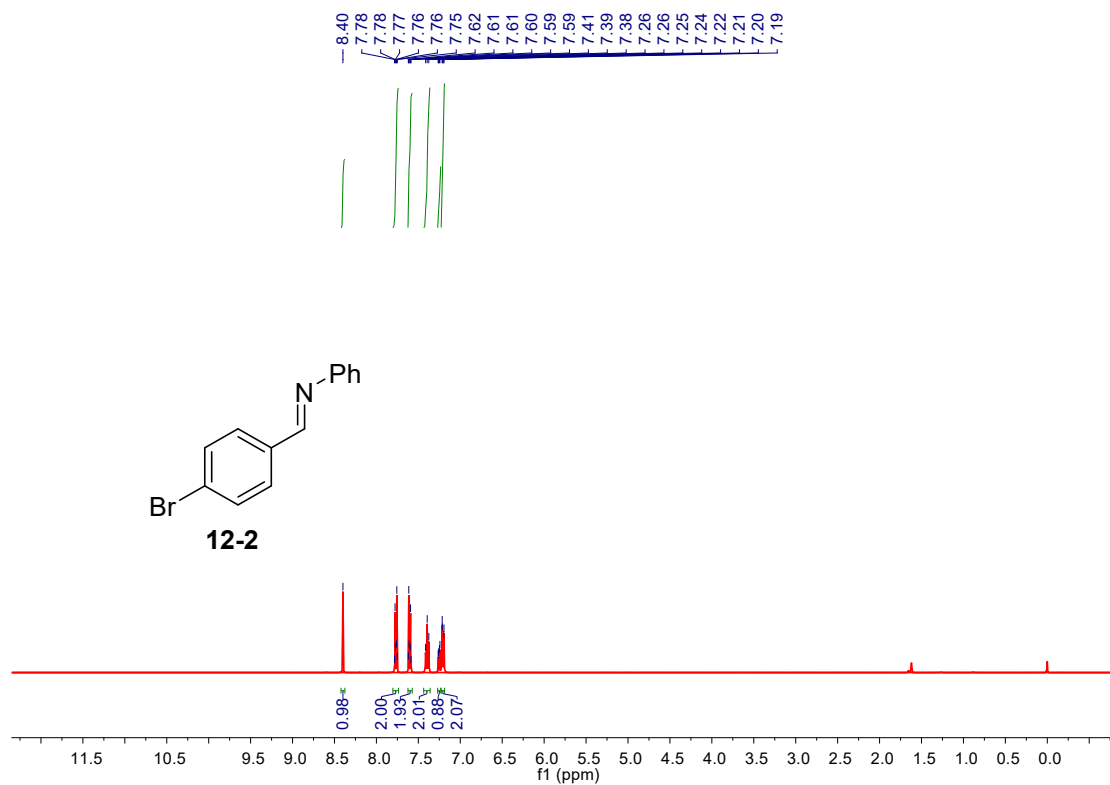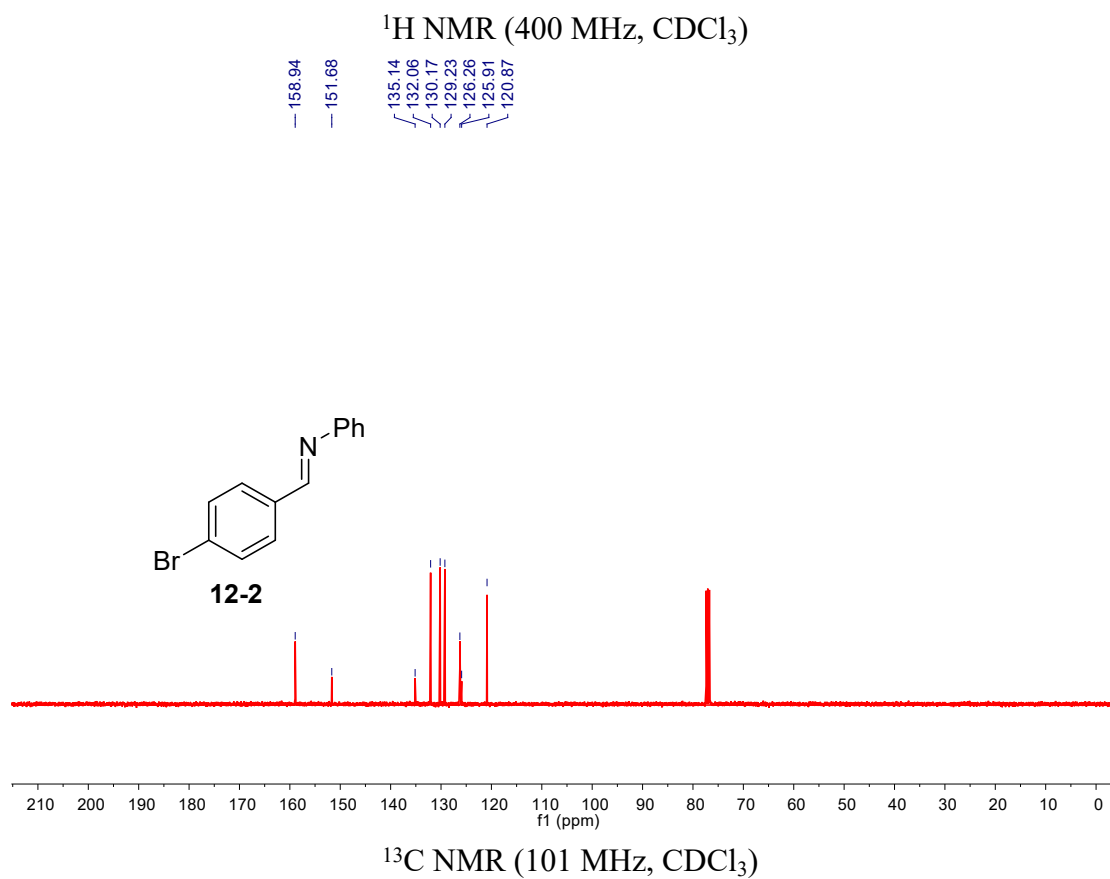

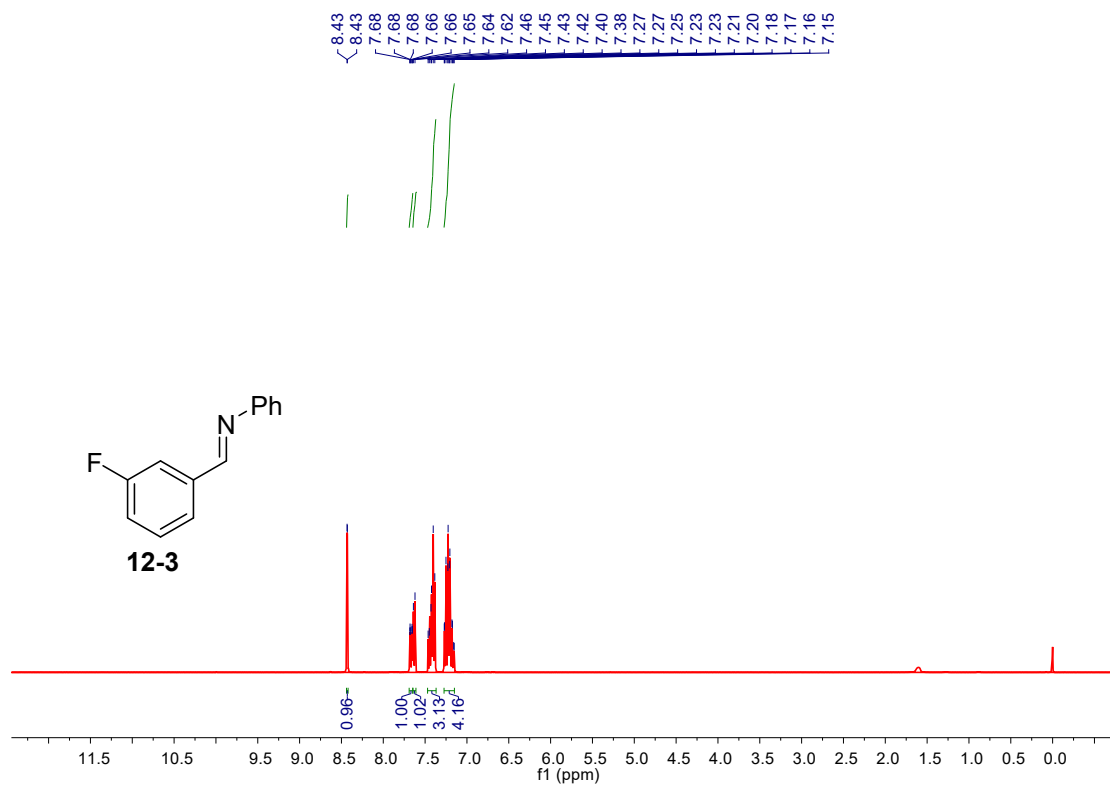

<sup>1</sup>H NMR (400 MHz, CDCl<sub>3</sub>)

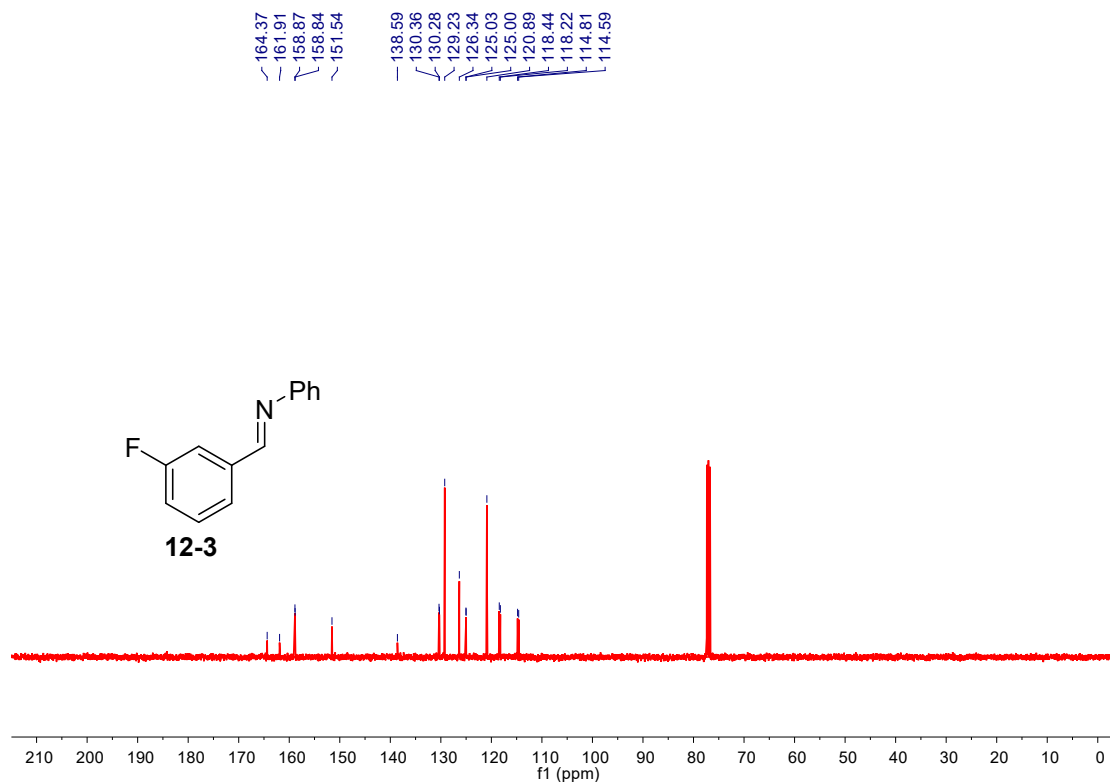

<sup>13</sup>C NMR (101 MHz, CDCl<sub>3</sub>)

--112.52

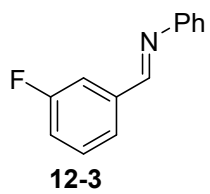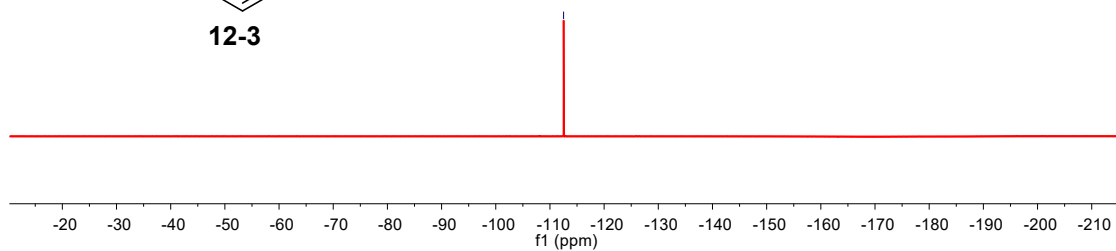

$^{19}\text{F}$  NMR (565 MHz,  $\text{CDCl}_3$ )

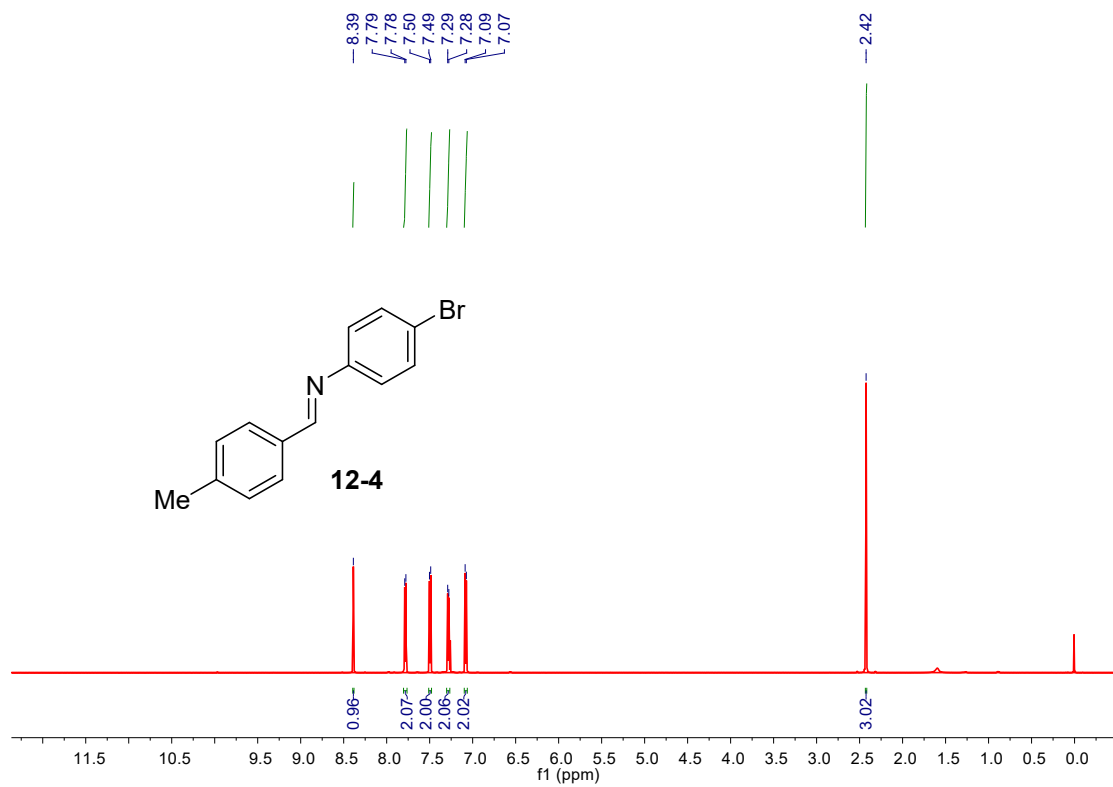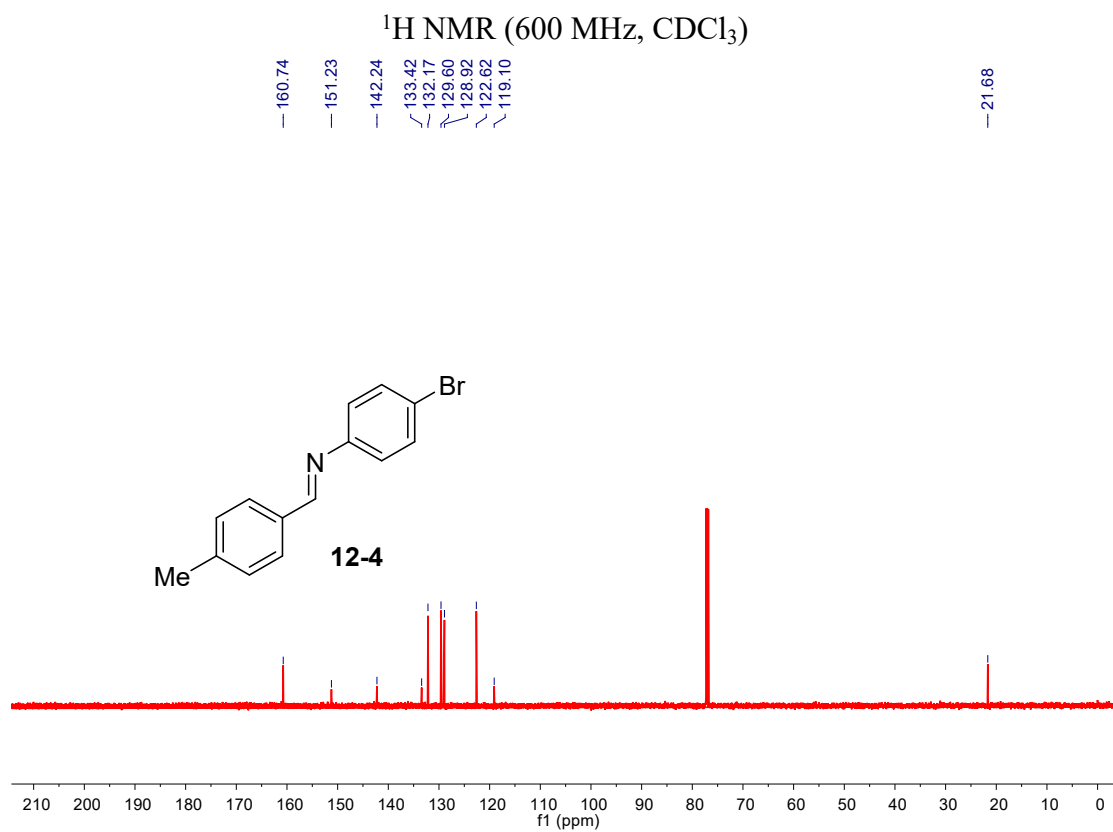

Supplement: d2gc02313j1.pdf [file d2gc02313j1.pdf]
